# Supplementary material for: Sex-specific and multiomic integration enhance accuracy of peripheral blood biomarkers of major depressive disorder
Source: Research Square preprint supplement (doi:10.21203/rs.3.rs-3978037/v1), 2024-02-23
Supplement: Supplementary file 1 [file 1970a18ba971c97c0658fc2c.xlsx]

## Sheet: Male
geneSet	description	source	normalizedEnrichmentScore	FDR	Pvalue	NumGenes
GO:0000041	transition metal ion transport	geneontology_Biological_Process_noRedundant	1.72856302925264	0.0114149728614766	0.000132135306536451	36
GO:0001101	response to acid chemical	geneontology_Biological_Process_noRedundant	1.38324646835652	0.0919046061187716	0.00964484284470159	49
GO:0001505	regulation of neurotransmitter levels	geneontology_Biological_Process_noRedundant	1.52746067927736	0.0429999386400315	0.000115593572983979	63
GO:0001562	response to protozoan	geneontology_Biological_Process_noRedundant	1.52986340808937	0.0422799260773485	0.0302158273332988	5
GO:0001818	negative regulation of cytokine production	geneontology_Biological_Process_noRedundant	1.54204186063271	0.0404047703545273	0.000572409845383811	80
GO:0001819	positive regulation of cytokine production	geneontology_Biological_Process_noRedundant	1.57918860801379	0.0300178546328508	0	113
GO:0001906	cell killing	geneontology_Biological_Process_noRedundant	1.65301349558953	0.0189789405249979	0.00037674243370881	47
GO:0001963	synaptic transmission, dopaminergic	geneontology_Biological_Process_noRedundant	1.47183127543926	0.0602121074645087	0.0495640942767898	7
GO:0002237	response to molecule of bacterial origin	geneontology_Biological_Process_noRedundant	1.91384654370609	0.00152312881931408	0	91
GO:0002269	leukocyte activation involved in inflammatory response	geneontology_Biological_Process_noRedundant	1.62440086275527	0.0228200825551581	0.00976502898843988	9
GO:0002446	neutrophil mediated immunity	geneontology_Biological_Process_noRedundant	2.71047543587996	0	0	253
GO:0002448	mast cell mediated immunity	geneontology_Biological_Process_noRedundant	1.89027797817009	0.00193183591040411	0	19
GO:0002526	acute inflammatory response	geneontology_Biological_Process_noRedundant	1.49457002718952	0.0507521776395964	0.00813524850538512	19
GO:0002532	production of molecular mediator involved in inflammatory response	geneontology_Biological_Process_noRedundant	1.85707055342439	0.00285374321536914	0	27
GO:0002576	platelet degranulation	geneontology_Biological_Process_noRedundant	1.75132825517473	0.00990358272650754	0	25
GO:0002683	negative regulation of immune system process	geneontology_Biological_Process_noRedundant	1.42045668264658	0.0747888201206404	0.00140646976074797	100
GO:0002697	regulation of immune effector process	geneontology_Biological_Process_noRedundant	1.52305096382539	0.044303089426099	0.00010907504361812	100
GO:0002764	immune response-regulating signaling pathway	geneontology_Biological_Process_noRedundant	1.82577630272281	0.00424558002911503	0	150
GO:0002791	regulation of peptide secretion	geneontology_Biological_Process_noRedundant	1.47948517623127	0.0569890374437627	0.000324534833370345	98
GO:0002831	regulation of response to biotic stimulus	geneontology_Biological_Process_noRedundant	1.57435347559848	0.0306677147061479	0.00150357098089167	35
GO:0002931	response to ischemia	geneontology_Biological_Process_noRedundant	1.44450169154126	0.0648354386626397	0.0421364985100688	10
GO:0003012	muscle system process	geneontology_Biological_Process_noRedundant	1.46839674176088	0.0607388094990255	0.00122808976206005	54
GO:0005996	monosaccharide metabolic process	geneontology_Biological_Process_noRedundant	1.51957472032827	0.0449256557644009	0.000459611628121382	57
GO:0006081	cellular aldehyde metabolic process	geneontology_Biological_Process_noRedundant	1.48767762907934	0.0539440467935155	0.0186007773433369	22
GO:0006090	pyruvate metabolic process	geneontology_Biological_Process_noRedundant	1.69056327488526	0.0138853774359752	0.00104849279147464	29
GO:0006091	generation of precursor metabolites and energy	geneontology_Biological_Process_noRedundant	1.65326579300696	0.0191791405289323	0	165
GO:0006515	protein quality control for misfolded or incompletely synthesized proteins	geneontology_Biological_Process_noRedundant	1.71252543229255	0.0117362780903256	0.00330926594414722	11
GO:0006605	protein targeting	geneontology_Biological_Process_noRedundant	1.39265849622169	0.086503575429437	0.00149588631248041	103
GO:0006643	membrane lipid metabolic process	geneontology_Biological_Process_noRedundant	1.72172563031271	0.0111388639399895	0	67
GO:0006720	isoprenoid metabolic process	geneontology_Biological_Process_noRedundant	1.3989441948298	0.0839485996902885	0.0412357286714257	18
GO:0006732	coenzyme metabolic process	geneontology_Biological_Process_noRedundant	1.51959306035025	0.0452242907202726	0	107
GO:0006836	neurotransmitter transport	geneontology_Biological_Process_noRedundant	1.54281674685034	0.040404326698222	0.00204622051010517	46
GO:0006898	receptor-mediated endocytosis	geneontology_Biological_Process_noRedundant	1.50536321053975	0.0481098274160627	0.000577767506288679	57
GO:0006907	pinocytosis	geneontology_Biological_Process_noRedundant	1.59706829373309	0.0266673514096749	0.0141021623293478	8
GO:0006909	phagocytosis	geneontology_Biological_Process_noRedundant	2.13667441414421	0	0	89
GO:0006949	syncytium formation	geneontology_Biological_Process_noRedundant	1.51057199671899	0.0466264818898216	0.0257320319394067	15
GO:0006959	humoral immune response	geneontology_Biological_Process_noRedundant	1.705479062088	0.0122615614305521	0	45
GO:0006968	cellular defense response	geneontology_Biological_Process_noRedundant	1.50295514294511	0.048925158278586	0.020576131684323	14
GO:0006979	response to oxidative stress	geneontology_Biological_Process_noRedundant	1.71622268758601	0.011369284854334	0	119
GO:0006984	ER-nucleus signaling pathway	geneontology_Biological_Process_noRedundant	1.53597716665122	0.041481950981924	0.0132139812427943	14
GO:0007006	mitochondrial membrane organization	geneontology_Biological_Process_noRedundant	1.51169605448274	0.0469955720109944	0.00421731580200728	44
GO:0007015	actin filament organization	geneontology_Biological_Process_noRedundant	1.61533298039314	0.0240831383521513	0	96
GO:0007033	vacuole organization	geneontology_Biological_Process_noRedundant	1.99136603964377	0.000588867647615854	0	56
GO:0007034	vacuolar transport	geneontology_Biological_Process_noRedundant	1.77402561283613	0.00793594035084797	0	27
GO:0007218	neuropeptide signaling pathway	geneontology_Biological_Process_noRedundant	1.39571675120283	0.0852802230043677	0.0700138185060627	8
GO:0007229	integrin-mediated signaling pathway	geneontology_Biological_Process_noRedundant	1.68700961857745	0.0143556473302551	0.000663658083267367	24
GO:0007249	I-kappaB kinase/NF-kappaB signaling	geneontology_Biological_Process_noRedundant	1.61151150103247	0.0244011190561673	0	94
GO:0008037	cell recognition	geneontology_Biological_Process_noRedundant	1.44927423081767	0.064239646047462	0.0168187744437003	22
GO:0008380	RNA splicing	geneontology_Biological_Process_noRedundant	1.45314206321163	0.0635696261076672	0.000106734977040588	133
GO:0008637	apoptotic mitochondrial changes	geneontology_Biological_Process_noRedundant	1.44285819935177	0.0655161314054757	0.0137957220587526	42
GO:0009123	nucleoside monophosphate metabolic process	geneontology_Biological_Process_noRedundant	1.62484758753897	0.022949590236641	0	126
GO:0009132	nucleoside diphosphate metabolic process	geneontology_Biological_Process_noRedundant	1.66177811317115	0.0179704287047817	0.00103842159903447	29
GO:0009141	nucleoside triphosphate metabolic process	geneontology_Biological_Process_noRedundant	1.72717936479295	0.0114047809214217	0	125
GO:0009259	ribonucleotide metabolic process	geneontology_Biological_Process_noRedundant	1.50019366964466	0.0498965535274732	0.000105909764869105	170
GO:0009299	mRNA transcription	geneontology_Biological_Process_noRedundant	1.39705840843883	0.0846514020303848	0.0790661478476162	6
GO:0009308	amine metabolic process	geneontology_Biological_Process_noRedundant	1.51822952281743	0.0452157156800006	0.0124401913858592	20
GO:0009311	oligosaccharide metabolic process	geneontology_Biological_Process_noRedundant	1.45072632210431	0.0640140902271668	0.0356196644045305	9
GO:0009593	detection of chemical stimulus	geneontology_Biological_Process_noRedundant	1.43682180378633	0.0672478426133332	0.0467085096997944	12
GO:0009595	detection of biotic stimulus	geneontology_Biological_Process_noRedundant	1.54501784922464	0.0397740460642074	0.0313763545153847	9
GO:0009612	response to mechanical stimulus	geneontology_Biological_Process_noRedundant	1.5971889266837	0.026873692309546	0.000243427458587704	51
GO:0009615	response to virus	geneontology_Biological_Process_noRedundant	1.40381646991785	0.0815098264725933	0.00312709403583571	73
GO:0009620	response to fungus	geneontology_Biological_Process_noRedundant	2.20292779172574	0	0	22
GO:0009636	response to toxic substance	geneontology_Biological_Process_noRedundant	1.6305713623413	0.0216729925277112	0	113
GO:0009743	response to carbohydrate	geneontology_Biological_Process_noRedundant	1.51018620433977	0.0464948465350184	0.00311302681955064	48
GO:0010038	response to metal ion	geneontology_Biological_Process_noRedundant	1.45626794702577	0.0633378381515839	0.00215029425054886	61
GO:0010256	endomembrane system organization	geneontology_Biological_Process_noRedundant	1.46360061167621	0.0617319682821909	0.000323624595434345	113
GO:0010324	membrane invagination	geneontology_Biological_Process_noRedundant	1.88099262809178	0.00201800413086818	0.000138178803352469	17
GO:0010498	proteasomal protein catabolic process	geneontology_Biological_Process_noRedundant	1.52367270363159	0.0443506191465473	0	132
GO:0010821	regulation of mitochondrion organization	geneontology_Biological_Process_noRedundant	1.39161192353897	0.0869257416391157	0.0123383556753662	54
GO:0010876	lipid localization	geneontology_Biological_Process_noRedundant	1.43789655684911	0.0669110389781136	0.00326099179092983	63
GO:0010959	regulation of metal ion transport	geneontology_Biological_Process_noRedundant	1.42732637297741	0.0712601079340052	0.00535124672602172	66
GO:0014074	response to purine-containing compound	geneontology_Biological_Process_noRedundant	1.3773447484317	0.0943861925728939	0.026999490572211	33
GO:0015696	ammonium transport	geneontology_Biological_Process_noRedundant	1.6238726594681	0.0227388688118243	0.00530503978705779	24
GO:0015850	organic hydroxy compound transport	geneontology_Biological_Process_noRedundant	1.51730279572681	0.0453048836010413	0.00344064880763816	39
GO:0015893	drug transport	geneontology_Biological_Process_noRedundant	1.45473451084815	0.0632599009190435	0.010350921483167	30
GO:0016042	lipid catabolic process	geneontology_Biological_Process_noRedundant	1.57882551581304	0.0299017817761653	0.000228232340496607	76
GO:0016050	vesicle organization	geneontology_Biological_Process_noRedundant	1.88690606817831	0.00188975555184415	0	95
GO:0016051	carbohydrate biosynthetic process	geneontology_Biological_Process_noRedundant	1.43426540806435	0.0685341909820612	0.00796102661502364	63
GO:0016052	carbohydrate catabolic process	geneontology_Biological_Process_noRedundant	1.92384301643479	0.00142007698098131	0	43
GO:0016197	endosomal transport	geneontology_Biological_Process_noRedundant	1.7204705541342	0.0109161042166846	0	61
GO:0016482	cytosolic transport	geneontology_Biological_Process_noRedundant	1.66115961457183	0.0178680801699147	0	44
GO:0016999	antibiotic metabolic process	geneontology_Biological_Process_noRedundant	1.46223832218568	0.0611914270472	0.0126517571868816	41
GO:0018195	peptidyl-arginine modification	geneontology_Biological_Process_noRedundant	1.39936853446194	0.0839862573581503	0.0780396441270424	9
GO:0018196	peptidyl-asparagine modification	geneontology_Biological_Process_noRedundant	1.38983653481944	0.0875520264923208	0.0753640594392187	11
GO:0018198	peptidyl-cysteine modification	geneontology_Biological_Process_noRedundant	1.47000616011403	0.0601762083263453	0.033838973157258	9
GO:0019058	viral life cycle	geneontology_Biological_Process_noRedundant	1.47165488930081	0.0599652985069496	0.00168387965854469	72
GO:0019882	antigen processing and presentation	geneontology_Biological_Process_noRedundant	1.74435610897756	0.0103910384187527	0	55
GO:0030099	myeloid cell differentiation	geneontology_Biological_Process_noRedundant	1.41129075735365	0.07825916315768	0.00228733253433315	91
GO:0031099	regeneration	geneontology_Biological_Process_noRedundant	1.53876450469777	0.0408666143749788	0.00223020691336511	45
GO:0031279	regulation of cyclase activity	geneontology_Biological_Process_noRedundant	1.46713876956634	0.0607649128261448	0.0450381679320552	9
GO:0031348	negative regulation of defense response	geneontology_Biological_Process_noRedundant	1.54933922339206	0.0383232996363155	0.00132673983821894	46
GO:0031349	positive regulation of defense response	geneontology_Biological_Process_noRedundant	1.86866527786533	0.00239321851659264	0	122
GO:0031529	ruffle organization	geneontology_Biological_Process_noRedundant	1.41267187770043	0.0786549563288678	0.0436440677904458	17
GO:0031532	actin cytoskeleton reorganization	geneontology_Biological_Process_noRedundant	1.37851601413166	0.0944972700853958	0.0386044043461655	28
GO:0031667	response to nutrient levels	geneontology_Biological_Process_noRedundant	1.47005413277983	0.0604984296258208	0.000325344322706285	105
GO:0032103	positive regulation of response to external stimulus	geneontology_Biological_Process_noRedundant	1.75285156684269	0.00995752543362732	0	69
GO:0032147	activation of protein kinase activity	geneontology_Biological_Process_noRedundant	1.46214014694594	0.0609185268068067	0.00178631238117826	80
GO:0032386	regulation of intracellular transport	geneontology_Biological_Process_noRedundant	1.42079476689419	0.0749052749513924	0.00152091254736329	90
GO:0032418	lysosome localization	geneontology_Biological_Process_noRedundant	1.99911848194724	0.0006697560607499	0	27
GO:0032527	protein exit from endoplasmic reticulum	geneontology_Biological_Process_noRedundant	1.74707354149369	0.010213779926436	0.00171379605802431	19
GO:0032602	chemokine production	geneontology_Biological_Process_noRedundant	1.46756946002058	0.0608521453310777	0.0216621253376482	29
GO:0032606	type I interferon production	geneontology_Biological_Process_noRedundant	1.75467011920098	0.00997764798194082	0	51
GO:0032612	interleukin-1 production	geneontology_Biological_Process_noRedundant	2.00898343121184	0.000577543269777088	0	36
GO:0032635	interleukin-6 production	geneontology_Biological_Process_noRedundant	1.83838598265504	0.00352443862543286	0	37
GO:0032637	interleukin-8 production	geneontology_Biological_Process_noRedundant	1.61740664634817	0.0240094504522221	0.00356018074715046	30
GO:0032963	collagen metabolic process	geneontology_Biological_Process_noRedundant	1.61008783364708	0.0245615763224751	0.00535346602534613	20
GO:0032970	regulation of actin filament-based process	geneontology_Biological_Process_noRedundant	1.38327172904583	0.092245584617914	0.00487264673257224	74
GO:0033619	membrane protein proteolysis	geneontology_Biological_Process_noRedundant	1.51481799224043	0.0461341563897938	0.0149295381589327	16
GO:0034109	homotypic cell-cell adhesion	geneontology_Biological_Process_noRedundant	1.67353496947606	0.0162956202117055	0.00109274689235176	14
GO:0034340	response to type I interferon	geneontology_Biological_Process_noRedundant	1.53010366129309	0.0424734541873168	0.0084382534143533	22
GO:0034341	response to interferon-gamma	geneontology_Biological_Process_noRedundant	1.97798208202904	0.000754203564061844	0	53
GO:0034367	protein-containing complex remodeling	geneontology_Biological_Process_noRedundant	1.44688238022076	0.0650331126724103	0.0634328358106047	5
GO:0034404	nucleobase-containing small molecule biosynthetic process	geneontology_Biological_Process_noRedundant	1.46102961331979	0.0609059609322261	0.00572961111718522	38
GO:0034612	response to tumor necrosis factor	geneontology_Biological_Process_noRedundant	1.60132606700719	0.0263845061497156	0.00023209933848995	61
GO:0034976	response to endoplasmic reticulum stress	geneontology_Biological_Process_noRedundant	1.61653772073659	0.0240088484798177	0	75
GO:0035456	response to interferon-beta	geneontology_Biological_Process_noRedundant	1.49716483919897	0.050113893541845	0.032305868400666	18
GO:0035459	cargo loading into vesicle	geneontology_Biological_Process_noRedundant	1.60746175884392	0.024866373745459	0.0131987577619257	5
GO:0035690	cellular response to drug	geneontology_Biological_Process_noRedundant	1.48491623703172	0.0547644902038158	0.00145413870229819	63
GO:0035821	modification of morphology or physiology of other organism	geneontology_Biological_Process_noRedundant	1.58747487090062	0.0290938569891205	0.00162256615057132	34
GO:0035924	cellular response to vascular endothelial growth factor stimulus	geneontology_Biological_Process_noRedundant	1.49703478488388	0.0498725600019274	0.0275841613484229	14
GO:0035966	response to topologically incorrect protein	geneontology_Biological_Process_noRedundant	1.43317884154558	0.0689083172881638	0.00665953145360215	51
GO:0036230	granulocyte activation	geneontology_Biological_Process_noRedundant	2.6955434752412	0	0	254
GO:0038061	NIK/NF-kappaB signaling	geneontology_Biological_Process_noRedundant	1.54101376623426	0.0402133804499068	0.00217530390247277	40
GO:0038127	ERBB signaling pathway	geneontology_Biological_Process_noRedundant	1.45040950108622	0.0638876666370739	0.0135876340047884	31
GO:0038179	neurotrophin signaling pathway	geneontology_Biological_Process_noRedundant	1.44601867892338	0.0649037657729608	0.0486584811204095	10
GO:0042116	macrophage activation	geneontology_Biological_Process_noRedundant	1.67430288293782	0.0163697117195894	0.00124206458718713	19
GO:0042157	lipoprotein metabolic process	geneontology_Biological_Process_noRedundant	1.48067806199379	0.0566569947651323	0.00992998090261872	29
GO:0042176	regulation of protein catabolic process	geneontology_Biological_Process_noRedundant	1.42714742081809	0.071051135978149	0.00173969772733068	99
GO:0042430	indole-containing compound metabolic process	geneontology_Biological_Process_noRedundant	1.403950399774	0.0817569908664714	0.084652665575985	3
GO:0042537	benzene-containing compound metabolic process	geneontology_Biological_Process_noRedundant	1.44632337686677	0.0650290739943387	0.0621712099374827	4
GO:0042737	drug catabolic process	geneontology_Biological_Process_noRedundant	1.46600681977	0.061088011090322	0.015846213791941	28
GO:0043062	extracellular structure organization	geneontology_Biological_Process_noRedundant	1.4851521091817	0.0549709566817663	0.00113186191271852	64
GO:0043094	cellular metabolic compound salvage	geneontology_Biological_Process_noRedundant	1.66552984646795	0.0175873792974584	0.00660759873755705	12
GO:0043112	receptor metabolic process	geneontology_Biological_Process_noRedundant	1.44496732218487	0.0648753911812774	0.00681265206729773	44
GO:0043171	peptide catabolic process	geneontology_Biological_Process_noRedundant	1.53137004020193	0.0425336246160259	0.0269588522738517	6
GO:0043254	regulation of protein complex assembly	geneontology_Biological_Process_noRedundant	1.40571044646024	0.0812119805548226	0.000430338891831056	96
GO:0043331	response to dsRNA	geneontology_Biological_Process_noRedundant	1.44213836253283	0.065326954539503	0.0402567094457035	15
GO:0043574	peroxisomal transport	geneontology_Biological_Process_noRedundant	1.46498539933657	0.0613112393906378	0.0231532524775147	20
GO:0043620	regulation of DNA-templated transcription in response to stress	geneontology_Biological_Process_noRedundant	1.51131939877988	0.0465500316649859	0.0123225287955636	20
GO:0043627	response to estrogen	geneontology_Biological_Process_noRedundant	1.51412065309492	0.0461708383744858	0.0160861658950782	19
GO:0043687	post-translational protein modification	geneontology_Biological_Process_noRedundant	1.64745240543241	0.0186476949725222	0	68
GO:0043900	regulation of multi-organism process	geneontology_Biological_Process_noRedundant	1.51975109858254	0.0454771394173358	0	80
GO:0044282	small molecule catabolic process	geneontology_Biological_Process_noRedundant	1.58044462751597	0.0301259690174191	0	92
GO:0044764	multi-organism cellular process	geneontology_Biological_Process_noRedundant	1.74068023750517	0.0102273902811677	0.00116822429889483	9
GO:0044872	lipoprotein localization	geneontology_Biological_Process_noRedundant	1.63726346366059	0.020177776433114	0.00872044272870695	4
GO:0045088	regulation of innate immune response	geneontology_Biological_Process_noRedundant	1.94179632522035	0.00110543349826112	0	118
GO:0045117	azole transport	geneontology_Biological_Process_noRedundant	1.58684615504923	0.0287755447355048	0.0157505118891557	6
GO:0045454	cell redox homeostasis	geneontology_Biological_Process_noRedundant	1.75835786556751	0.00967429678368091	0.000417188151798472	26
GO:0045576	mast cell activation	geneontology_Biological_Process_noRedundant	1.80659822036811	0.00518624149650249	0.000697544642759829	22
GO:0045730	respiratory burst	geneontology_Biological_Process_noRedundant	1.93105670702229	0.00127399250686122	0	15
GO:0045861	negative regulation of proteolysis	geneontology_Biological_Process_noRedundant	1.66046783978875	0.0177776554386006	0	80
GO:0045862	positive regulation of proteolysis	geneontology_Biological_Process_noRedundant	1.64797582172134	0.0187531697009972	0	102
GO:0046390	ribose phosphate biosynthetic process	geneontology_Biological_Process_noRedundant	1.45270388164158	0.0635004427582321	0.00336426914114104	75
GO:0046434	organophosphate catabolic process	geneontology_Biological_Process_noRedundant	1.45491842801144	0.0634831126268692	0.00599520383621161	39
GO:0046677	response to antibiotic	geneontology_Biological_Process_noRedundant	1.41566405075765	0.0769819232568851	0.00340444847896	55
GO:0046939	nucleotide phosphorylation	geneontology_Biological_Process_noRedundant	1.6498610357695	0.0192388596838599	0.002415783116036	25
GO:0048013	ephrin receptor signaling pathway	geneontology_Biological_Process_noRedundant	1.59917106125773	0.0267865337725636	0.00436264485284763	15
GO:0048193	Golgi vesicle transport	geneontology_Biological_Process_noRedundant	1.44534902323523	0.0649760916217804	0.000652032166849377	95
GO:0048284	organelle fusion	geneontology_Biological_Process_noRedundant	1.69796811337425	0.0129939395745956	0.000251130085352696	42
GO:0048857	neural nucleus development	geneontology_Biological_Process_noRedundant	1.50701911842959	0.0476606277038152	0.0223259886148656	12
GO:0050663	cytokine secretion	geneontology_Biological_Process_noRedundant	1.94600537889084	0.00112111340603788	0	62
GO:0050727	regulation of inflammatory response	geneontology_Biological_Process_noRedundant	1.68179569049029	0.0151091818581837	0	80
GO:0050817	coagulation	geneontology_Biological_Process_noRedundant	1.61208757712141	0.0244708480717904	0.000112956060079865	75
GO:0050878	regulation of body fluid levels	geneontology_Biological_Process_noRedundant	1.53264610821128	0.0422824164204172	0.000108436347852045	93
GO:0050900	leukocyte migration	geneontology_Biological_Process_noRedundant	1.58507895273381	0.0290666978126822	0	81
GO:0051047	positive regulation of secretion	geneontology_Biological_Process_noRedundant	1.70055670399496	0.0127478875217801	0	89
GO:0051051	negative regulation of transport	geneontology_Biological_Process_noRedundant	1.53412449238104	0.0419533226582971	0.000109134562904165	121
GO:0051090	regulation of DNA-binding transcription factor activity	geneontology_Biological_Process_noRedundant	1.46294321790317	0.0617952835001964	0.000326690623943516	91
GO:0051098	regulation of binding	geneontology_Biological_Process_noRedundant	1.46282953725562	0.0615240593281012	0.000766031954391986	79
GO:0051156	glucose 6-phosphate metabolic process	geneontology_Biological_Process_noRedundant	1.87204434377357	0.00230886642012696	0.000154154462747934	8
GO:0051181	cofactor transport	geneontology_Biological_Process_noRedundant	1.66682629389655	0.0175103192331926	0.00504759157700496	11
GO:0051187	cofactor catabolic process	geneontology_Biological_Process_noRedundant	1.71038694185101	0.0118634182238917	0.00213189312078853	17
GO:0051193	regulation of cofactor metabolic process	geneontology_Biological_Process_noRedundant	1.64200891541232	0.0194307020796461	0.00260238323481682	20
GO:0051235	maintenance of location	geneontology_Biological_Process_noRedundant	1.4064800981379	0.0809949991738141	0.00395614332497387	65
GO:0051258	protein polymerization	geneontology_Biological_Process_noRedundant	1.43809649778873	0.0670978956843676	0.00351673284134807	67
GO:0051346	negative regulation of hydrolase activity	geneontology_Biological_Process_noRedundant	1.41904896706332	0.0753918189740307	0.00287451630703433	65
GO:0051604	protein maturation	geneontology_Biological_Process_noRedundant	1.49901054167666	0.0495322033943684	0.000791944790045034	75
GO:0051656	establishment of organelle localization	geneontology_Biological_Process_noRedundant	1.38125819503516	0.0930765833099696	0.00192040968719509	104
GO:0051701	interaction with host	geneontology_Biological_Process_noRedundant	1.64805394271608	0.018958221828292	0	51
GO:0051702	interaction with symbiont	geneontology_Biological_Process_noRedundant	1.39398426293228	0.0858414079590561	0.038498034426122	19
GO:0052547	regulation of peptidase activity	geneontology_Biological_Process_noRedundant	1.90530636694721	0.0016521671246874	0	117
GO:0055067	monovalent inorganic cation homeostasis	geneontology_Biological_Process_noRedundant	1.57479960308713	0.0307602858565719	0.00323918113458938	26
GO:0055076	transition metal ion homeostasis	geneontology_Biological_Process_noRedundant	1.7394804245224	0.0101897715570058	0	30
GO:0055088	lipid homeostasis	geneontology_Biological_Process_noRedundant	1.41079775342388	0.0782802235340329	0.022881799160188	20
GO:0055094	response to lipoprotein particle	geneontology_Biological_Process_noRedundant	1.74301082276986	0.0101285235389927	0.00246609124499598	8
GO:0060326	cell chemotaxis	geneontology_Biological_Process_noRedundant	1.57970090261753	0.030098454083466	0.000232018561458002	53
GO:0060491	regulation of cell projection assembly	geneontology_Biological_Process_noRedundant	1.42911024053801	0.0704999657096851	0.00761451516863599	47
GO:0060627	regulation of vesicle-mediated transport	geneontology_Biological_Process_noRedundant	1.65027028098788	0.0193736040518386	0	105
GO:0060759	regulation of response to cytokine stimulus	geneontology_Biological_Process_noRedundant	1.57636199743643	0.0304849420325133	0.000612519906821938	45
GO:0061025	membrane fusion	geneontology_Biological_Process_noRedundant	1.99870027142253	0.000611516403293387	0	43
GO:0061919	process utilizing autophagic mechanism	geneontology_Biological_Process_noRedundant	1.81751411146634	0.00455639673042132	0	137
GO:0070206	protein trimerization	geneontology_Biological_Process_noRedundant	1.40331106434646	0.0815022580406128	0.0506075768333656	11
GO:0070265	necrotic cell death	geneontology_Biological_Process_noRedundant	1.40463182181493	0.0816106644039298	0.0476927405672914	24
GO:0070482	response to oxygen levels	geneontology_Biological_Process_noRedundant	1.64969126178278	0.0190415270293795	0	66
GO:0070555	response to interleukin-1	geneontology_Biological_Process_noRedundant	1.55066245732339	0.0380952070496103	0.00350613573710166	36
GO:0070646	protein modification by small protein removal	geneontology_Biological_Process_noRedundant	1.53617973795279	0.0416888377872063	0.000225479143153835	85
GO:0070671	response to interleukin-12	geneontology_Biological_Process_noRedundant	1.7035574086776	0.0123775449777717	0.0012804097309318	23
GO:0070972	protein localization to endoplasmic reticulum	geneontology_Biological_Process_noRedundant	1.74405205568755	0.0101826746548399	0	24
GO:0070997	neuron death	geneontology_Biological_Process_noRedundant	1.41151037100989	0.0784241108604567	0.00415543575874265	68
GO:0071216	cellular response to biotic stimulus	geneontology_Biological_Process_noRedundant	1.9017212228094	0.00170205398916659	0	69
GO:0071241	cellular response to inorganic substance	geneontology_Biological_Process_noRedundant	1.41266540202991	0.0783159355326959	0.0122543072055018	31
GO:0071402	cellular response to lipoprotein particle stimulus	geneontology_Biological_Process_noRedundant	1.70797407141748	0.0120565638419811	0.0039895657505003	8
GO:0071496	cellular response to external stimulus	geneontology_Biological_Process_noRedundant	1.72267373568176	0.0116423315242395	0	87
GO:0071706	tumor necrosis factor superfamily cytokine production	geneontology_Biological_Process_noRedundant	1.72228025922734	0.011486124141105	0	56
GO:0071800	podosome assembly	geneontology_Biological_Process_noRedundant	1.92086474868951	0.00133694272484731	0	8
GO:0071825	protein-lipid complex subunit organization	geneontology_Biological_Process_noRedundant	1.44264058220211	0.0653303357518435	0.0491191400344701	10
GO:0071867	response to monoamine	geneontology_Biological_Process_noRedundant	1.64938688635932	0.01887350827032	0.00705705705599744	14
GO:0071900	regulation of protein serine/threonine kinase activity	geneontology_Biological_Process_noRedundant	1.45559536699988	0.0634103228779614	0.000212765957424174	108
GO:0071985	multivesicular body sorting pathway	geneontology_Biological_Process_noRedundant	1.5908993293088	0.0282576170721844	0.011801613383358	15
GO:0072337	modified amino acid transport	geneontology_Biological_Process_noRedundant	1.39403485544898	0.0861501812974404	0.0783265177605652	3
GO:0072512	trivalent inorganic cation transport	geneontology_Biological_Process_noRedundant	1.89263702522684	0.0019073487817008	0	12
GO:0072522	purine-containing compound biosynthetic process	geneontology_Biological_Process_noRedundant	1.41773505692829	0.0759141694309678	0.00530381644121944	73
GO:0072524	pyridine-containing compound metabolic process	geneontology_Biological_Process_noRedundant	1.85240105623378	0.00302946631976379	0	51
GO:0072593	reactive oxygen species metabolic process	geneontology_Biological_Process_noRedundant	1.88859815114473	0.00190544966243592	0	62
GO:0090066	regulation of anatomical structure size	geneontology_Biological_Process_noRedundant	1.39006640756536	0.0877079885526821	0.00215308429301829	88
GO:0090077	foam cell differentiation	geneontology_Biological_Process_noRedundant	1.45360797768356	0.0636102498687337	0.0491264745335036	9
GO:0090130	tissue migration	geneontology_Biological_Process_noRedundant	1.37606732740926	0.0960813298862063	0.01123982107911	57
GO:0090382	phagosome maturation	geneontology_Biological_Process_noRedundant	1.47376152554793	0.0598201700210051	0.0480261112763404	5
GO:0090559	regulation of membrane permeability	geneontology_Biological_Process_noRedundant	1.43045889282067	0.0702869847638592	0.0253589158694004	22
GO:0090662	ATP hydrolysis coupled transmembrane transport	geneontology_Biological_Process_noRedundant	1.94608234197591	0.00122303280658677	0.00030707815134238	13
GO:0097006	regulation of plasma lipoprotein particle levels	geneontology_Biological_Process_noRedundant	1.80544192210065	0.00512428097204181	0.000137098985448711	22
GO:0097066	response to thyroid hormone	geneontology_Biological_Process_noRedundant	1.59778208600961	0.0269581577040646	0.0141172820331807	10
GO:0097164	ammonium ion metabolic process	geneontology_Biological_Process_noRedundant	1.49998443287676	0.04968918948624	0.00364121859404767	50
GO:0097191	extrinsic apoptotic signaling pathway	geneontology_Biological_Process_noRedundant	1.56992550329427	0.0319388885703843	0.000589205750578694	60
GO:0097193	intrinsic apoptotic signaling pathway	geneontology_Biological_Process_noRedundant	1.46144096032905	0.0609920205274209	0.00157427189906957	75
GO:0097194	execution phase of apoptosis	geneontology_Biological_Process_noRedundant	1.46268563739233	0.0612689024353466	0.0189012782133667	24
GO:0097242	amyloid-beta clearance	geneontology_Biological_Process_noRedundant	1.53041178693078	0.0426521692800675	0.0294766708654671	13
GO:0097722	sperm motility	geneontology_Biological_Process_noRedundant	1.39830541798916	0.0840818208346499	0.0580895008522534	10
GO:0098542	defense response to other organism	geneontology_Biological_Process_noRedundant	1.81924236649009	0.0045585768245507	0	107
GO:0098732	macromolecule deacylation	geneontology_Biological_Process_noRedundant	1.56112561032266	0.0346912269271559	0.00317097919797425	38
GO:0098780	response to mitochondrial depolarisation	geneontology_Biological_Process_noRedundant	1.51164479908415	0.0467230506830045	0.0377182044828993	10
GO:0098927	vesicle-mediated transport between endosomal compartments	geneontology_Biological_Process_noRedundant	1.69406094367848	0.0134672589725294	0.00231514976091519	14
GO:0099132	ATP hydrolysis coupled cation transmembrane transport	geneontology_Biological_Process_noRedundant	2.07762281894076	0.000101919400548898	0	22
GO:0140029	exocytic process	geneontology_Biological_Process_noRedundant	1.62308176547055	0.0227162251286565	0.00311442112347807	22
GO:0140112	extracellular vesicle biogenesis	geneontology_Biological_Process_noRedundant	1.66370211602922	0.0177353529847048	0.00676714856863009	10
GO:0140253	cell-cell fusion	geneontology_Biological_Process_noRedundant	1.47373356066192	0.0594873495400287	0.0386145910038888	14
GO:0150076	neuroinflammatory response	geneontology_Biological_Process_noRedundant	1.64605622765228	0.018728568466382	0.00451960927182977	14
GO:1901136	carbohydrate derivative catabolic process	geneontology_Biological_Process_noRedundant	1.84735360214698	0.00316289873036746	0	48
GO:1901293	nucleoside phosphate biosynthetic process	geneontology_Biological_Process_noRedundant	1.43958398113946	0.0665278887082931	0.00166833500148278	95
GO:1901522	positive regulation of transcription from RNA polymerase II promoter involved in cellular response to chemical stimulus	geneontology_Biological_Process_noRedundant	1.49961105496154	0.0495535900261354	0.039508893429953	7
GO:1901568	fatty acid derivative metabolic process	geneontology_Biological_Process_noRedundant	1.45086672718958	0.0642519461349246	0.0118928392573995	33
GO:1901571	fatty acid derivative transport	geneontology_Biological_Process_noRedundant	1.43039026599546	0.0700130435524052	0.062635323219512	8
GO:1901652	response to peptide	geneontology_Biological_Process_noRedundant	1.58262435878195	0.0296434792135612	0.000108412836068038	118
GO:1902115	regulation of organelle assembly	geneontology_Biological_Process_noRedundant	1.44821449946384	0.0645523173575544	0.00608471799601162	41
GO:1902600	proton transmembrane transport	geneontology_Biological_Process_noRedundant	1.92336789325626	0.00133769213220428	0	47
GO:1903008	organelle disassembly	geneontology_Biological_Process_noRedundant	1.73569534559397	0.0105592745610348	0.000258866166158573	34
GO:1903509	liposaccharide metabolic process	geneontology_Biological_Process_noRedundant	1.72213432560041	0.0112866299126372	0.000129735339889759	28
GO:1903513	endoplasmic reticulum to cytosol transport	geneontology_Biological_Process_noRedundant	1.72085063250216	0.0110582549595554	0.00285413850039746	10
GO:1903828	negative regulation of cellular protein localization	geneontology_Biological_Process_noRedundant	1.5566197280199	0.0360656067558352	0.00361150522331852	30
GO:1904950	negative regulation of establishment of protein localization	geneontology_Biological_Process_noRedundant	1.63748852405237	0.0203460897702502	0.000610426077327503	44
GO:1904951	positive regulation of establishment of protein localization	geneontology_Biological_Process_noRedundant	1.54132556264583	0.040387312991556	0	111
GO:1990089	response to nerve growth factor	geneontology_Biological_Process_noRedundant	1.4117300280674	0.0786223980947337	0.0558159976478441	13
GO:1990845	adaptive thermogenesis	geneontology_Biological_Process_noRedundant	1.60752336826118	0.0250860256574336	0.00100414208597915	39
GO:2001023	regulation of response to drug	geneontology_Biological_Process_noRedundant	1.58722222381953	0.028915079932511	0.00949411931281081	21
GO:2001057	reactive nitrogen species metabolic process	geneontology_Biological_Process_noRedundant	1.72613173013732	0.0113550202729184	0.000825536598675628	24
GO:2001233	regulation of apoptotic signaling pathway	geneontology_Biological_Process_noRedundant	1.61237816051521	0.0246264038437393	0	110
hsa00010	Glycolysis / Gluconeogenesis	pathway_KEGG	1.70843369483081	0.0137985634241616	0.00200028575482208	14
hsa00020	Citrate cycle (TCA cycle)	pathway_KEGG	1.48898218142689	0.0680658888359724	0.0345090853512736	16
hsa00030	Pentose phosphate pathway	pathway_KEGG	1.8421943050725	0.00296562525954251	0.00106968215142578	7
hsa00051	Fructose and mannose metabolism	pathway_KEGG	1.59388771378672	0.0341820253837973	0.0136268343795108	11
hsa00052	Galactose metabolism	pathway_KEGG	1.65794167967028	0.0219743798725089	0.00566615620127624	13
hsa00190	Oxidative phosphorylation	pathway_KEGG	1.81338486813793	0.0038089730322778	0	73
hsa00480	Glutathione metabolism	pathway_KEGG	1.76960743044727	0.00678153092229717	0.000871839581390317	15
hsa00500	Starch and sucrose metabolism	pathway_KEGG	1.60990866026043	0.0304994247696174	0.0133047866625929	8
hsa00511	Other glycan degradation	pathway_KEGG	1.84089245464016	0.00285802887824392	0.000315507177738522	8
hsa00520	Amino sugar and nucleotide sugar metabolism	pathway_KEGG	1.56299363690872	0.0445873675590335	0.0116379310328106	19
hsa00531	Glycosaminoglycan degradation	pathway_KEGG	1.80139788291267	0.00439390874498717	0.00160051216363628	8
hsa00600	Sphingolipid metabolism	pathway_KEGG	1.60793216919536	0.0305308934918407	0.00849899164383477	13
hsa00604	Glycosphingolipid biosynthesis	pathway_KEGG	1.58997653219946	0.0350540043905713	0.018214343792777	3
hsa00860	Porphyrin and chlorophyll metabolism	pathway_KEGG	1.47060817826861	0.076609830495287	0.0438881162040043	8
hsa00980	Metabolism of xenobiotics by cytochrome P450	pathway_KEGG	1.49263823572684	0.0675574515064013	0.0380664652510474	13
hsa00982	Drug metabolism	pathway_KEGG	1.63345346849934	0.02657827440724	0.00997195387815956	5
hsa00983	Drug metabolism	pathway_KEGG	1.58598534437737	0.0359803850933384	0.00818142672481966	14
hsa01200	Carbon metabolism	pathway_KEGG	1.81670209052991	0.003995524371785	0	22
hsa01230	Biosynthesis of amino acids	pathway_KEGG	1.63364544180843	0.0271769966032214	0.00376674107090308	12
hsa03010	Ribosome	pathway_KEGG	1.49883187917415	0.0645028940070149	0.00592958616356645	44
hsa03040	Spliceosome	pathway_KEGG	1.64668252722668	0.0238257012537093	0.000247341083323356	63
hsa03050	Proteasome	pathway_KEGG	2.21229808874075	0	0	35
hsa03320	PPAR signaling pathway	pathway_KEGG	1.50918941507349	0.0609399004579915	0.0196078431344689	8
hsa04130	SNARE interactions in vesicular transport	pathway_KEGG	1.60739721015649	0.030066463799126	0.00943813596675444	12
hsa04136	Autophagy	pathway_KEGG	1.48549721894341	0.0693898925996256	0.0313377679185014	15
hsa04137	Mitophagy	pathway_KEGG	1.51554482858759	0.0599588076850544	0.0124266011180627	20
hsa04140	Autophagy	pathway_KEGG	1.53425003335931	0.0523351184846433	0.00272918992646952	37
hsa04141	Protein processing in endoplasmic reticulum	pathway_KEGG	1.66191778068534	0.0215400109790317	0.000120336943427156	59
hsa04142	Lysosome	pathway_KEGG	2.25368566856192	0	0	55
hsa04144	Endocytosis	pathway_KEGG	1.69756410041218	0.0154407315009126	0	72
hsa04145	Phagosome	pathway_KEGG	2.39185772376588	0	0	59
hsa04150	mTOR signaling pathway	pathway_KEGG	1.55664297419256	0.0459285240733798	0.00147710487426427	35
hsa04216	Ferroptosis	pathway_KEGG	1.53805381583018	0.0529403830585629	0.0175671685831758	13
hsa04217	Necroptosis	pathway_KEGG	1.81619521761878	0.00383248062911185	0	46
hsa04260	Cardiac muscle contraction	pathway_KEGG	1.54278997536496	0.0513203433812668	0.00880681818056721	22
hsa04380	Osteoclast differentiation	pathway_KEGG	2.01421668734288	0.000212310716669548	0	48
hsa04620	Toll-like receptor signaling pathway	pathway_KEGG	1.67474481570979	0.0192463027047861	0.00131960939544476	37
hsa04621	NOD-like receptor signaling pathway	pathway_KEGG	1.98918125984079	0.000317558764249324	0	55
hsa04622	RIG-I-like receptor signaling pathway	pathway_KEGG	1.50179211336265	0.0635690948895807	0.0194934547496452	19
hsa04625	C-type lectin receptor signaling pathway	pathway_KEGG	1.6621927105087	0.022080314533633	0	32
hsa04657	IL-17 signaling pathway	pathway_KEGG	1.76047222971812	0.00722340335745796	0.000541125541052337	26
hsa04664	Fc epsilon RI signaling pathway	pathway_KEGG	1.50884455133052	0.0602654738650692	0.0143964562549285	20
hsa04666	Fc gamma R-mediated phagocytosis	pathway_KEGG	1.76271686666275	0.00723301154570961	0	32
hsa04668	TNF signaling pathway	pathway_KEGG	1.5107367862454	0.0609331756841604	0.00826232894290442	30
hsa04670	Leukocyte transendothelial migration	pathway_KEGG	1.72505423235071	0.0117791618767624	0.000267988744436823	33
hsa04714	Thermogenesis	pathway_KEGG	1.53737235103376	0.0524581673838744	0.000700198389461991	87
hsa04721	Synaptic vesicle cycle	pathway_KEGG	1.88245061097267	0.00160929010682658	0.000284656988288549	21
hsa04722	Neurotrophin signaling pathway	pathway_KEGG	1.51515725209018	0.0592668582412085	0.0058966799120758	33
hsa04912	GnRH signaling pathway	pathway_KEGG	1.61461285285592	0.0302036491852817	0.00339259058170816	25
hsa04928	Parathyroid hormone synthesis, secretion and action	pathway_KEGG	1.45881651986951	0.0764967709173317	0.017770172434149	20
hsa04932	Non-alcoholic fatty liver disease (NAFLD)	pathway_KEGG	1.6119445651972	0.0304541616295661	0.000864304234984034	65
hsa04966	Collecting duct acid secretion	pathway_KEGG	1.93144400195048	0.000789855253623774	0	8
hsa04975	Fat digestion and absorption	pathway_KEGG	1.51769500829999	0.0605285150874312	0.0343834959164587	5
hsa04979	Cholesterol metabolism	pathway_KEGG	1.7230883149721	0.0116489314968425	0.00330429558376325	10
hsa05010	Alzheimer disease	pathway_KEGG	1.87278818510029	0.00186724553378603	0	78
hsa05012	Parkinson disease	pathway_KEGG	1.63045107480229	0.0255949477087099	0.00111926377302335	68
hsa05016	Huntington disease	pathway_KEGG	1.65337674205926	0.0226716901331012	0.000119990400753541	83
hsa05034	Alcoholism	pathway_KEGG	1.68547951173976	0.0170892805531845	0.000513742614883927	28
hsa05100	Bacterial invasion of epithelial cells	pathway_KEGG	1.48515641700624	0.0686709128155744	0.0165873555381934	20
hsa05110	Vibrio cholerae infection	pathway_KEGG	1.99909509460469	0.000285802887824392	0	19
hsa05120	Epithelial cell signaling in Helicobacter pylori infection	pathway_KEGG	1.88366124751996	0.00156783298463666	0	24
hsa05130	Pathogenic Escherichia coli infection	pathway_KEGG	1.82117223639047	0.0038929361773133	0.000283647709504517	21
hsa05131	Shigellosis	pathway_KEGG	1.6331717507992	0.0260516137082596	0.0031173759822286	25
hsa05132	Salmonella infection	pathway_KEGG	1.92216353856899	0.000857408663473176	0	32
hsa05133	Pertussis	pathway_KEGG	1.78584681440359	0.00553504926086572	0.000276281254278729	23
hsa05134	Legionellosis	pathway_KEGG	1.84556011841128	0.00292947960020002	0.000140884756249523	21
hsa05140	Leishmaniasis	pathway_KEGG	2.13808533628043	2.28642310259514e-05	0	28
hsa05144	Malaria	pathway_KEGG	1.55926757125913	0.0454998197416432	0.0155210642992578	10
hsa05145	Toxoplasmosis	pathway_KEGG	1.53505475792557	0.0527732689721118	0.00480207657303023	31
hsa05150	Staphylococcus aureus infection	pathway_KEGG	2.04386618321087	0.000114321155129757	0	19
hsa05152	Tuberculosis	pathway_KEGG	2.3259602120484	0	0	71
hsa05164	Influenza A	pathway_KEGG	1.68908802631698	0.0167944921957808	0.00012271444347494	43
hsa05167	Kaposi sarcoma-associated herpesvirus infection	pathway_KEGG	1.4901322900197	0.0682888806929887	0.0052477422497867	45
hsa05168	Herpes simplex infection	pathway_KEGG	1.51701488005263	0.0599543007933618	0.00168512277302779	45
hsa05169	Epstein-Barr virus infection	pathway_KEGG	1.63226358743681	0.0256876976945049	0	61
hsa05203	Viral carcinogenesis	pathway_KEGG	1.47353738769438	0.0755306509729366	0.0043041606881511	47
hsa05204	Chemical carcinogenesis	pathway_KEGG	1.56919786230136	0.042486486652657	0.016804155206721	15
hsa05323	Rheumatoid arthritis	pathway_KEGG	1.97834380527947	0.000354395580902246	0	27
hsa05418	Fluid shear stress and atherosclerosis	pathway_KEGG	1.54294972131639	0.0521444861792727	0.00329991115581928	33
P00049	Parkinson disease	pathway_Panther	1.96689082429456	0.00119466128428594	0	31
P00054	Toll receptor signaling pathway	pathway_Panther	2.02166390002467	0.000325816713896166	0	25
P04393	Ras Pathway	pathway_Panther	1.67228467500659	0.0904322390347359	0.000953159041264548	27
R-HSA-1236974	ER-Phagosome pathway	pathway_Reactome	2.36113743790648	0	0	55
R-HSA-1236975	Antigen processing-Cross presentation	pathway_Reactome	2.39938948137798	0	0	60
R-HSA-1236978	Cross-presentation of soluble exogenous antigens (endosomes)	pathway_Reactome	2.25964529537389	0	0	37
R-HSA-180585	Vif-mediated degradation of APOBEC3G	pathway_Reactome	2.26453807185772	0	0	40
R-HSA-211733	Regulation of activated PAK-2p34 by proteasome mediated degradation	pathway_Reactome	2.28035352606279	0	0	39
R-HSA-450408	AUF1 (hnRNP D0) binds and destabilizes mRNA	pathway_Reactome	2.26680787933864	0	0	40
R-HSA-4641258	Degradation of DVL	pathway_Reactome	2.28431972772629	0	0	39
R-HSA-5678895	Defective CFTR causes cystic fibrosis	pathway_Reactome	2.28370607258667	0	0	44
R-HSA-6798695	Neutrophil degranulation	pathway_Reactome	2.72291677767442	0	0	248
R-HSA-8854050	FBXL7 down-regulates AURKA during mitotic entry and in early mitosis	pathway_Reactome	2.26655306178189	0	0	39
R-HSA-9013694	Signaling by NOTCH4	pathway_Reactome	2.28774702957529	0	0	50
R-HSA-9604323	Negative regulation of NOTCH4 signaling	pathway_Reactome	2.32588072010679	0	0	42
WP100	Glutathione metabolism	pathway_Wikipathway	1.60227789026163	0.0680307420413058	0.0154597233498031	6
WP127	IL-5 Signaling Pathway	pathway_Wikipathway	1.62693249239375	0.0567540928931149	0.00492182976188161	16
WP129	Matrix Metalloproteinases	pathway_Wikipathway	1.65603305406965	0.0572107897009724	0.00938207699621772	6
WP1433	Nucleotide-binding Oligomerization Domain (NOD) pathway	pathway_Wikipathway	1.82551354819969	0.0124780089842907	0.000721292556156767	20
WP1449	Regulation of toll-like receptor signaling pathway	pathway_Wikipathway	1.75882843860553	0.0245120071831644	0	49
WP15	Selenium Micronutrient Network	pathway_Wikipathway	1.7423400432671	0.0280255690012946	0.000412654745472812	18
WP167	Eicosanoid Synthesis	pathway_Wikipathway	1.63332922061453	0.0571538317563272	0.00974076983350499	8
WP1772	Apoptosis Modulation and Signaling	pathway_Wikipathway	1.56502213160697	0.0820564112904485	0.00542328042256306	25
WP183	Proteasome Degradation	pathway_Wikipathway	2.31678087219378	0	0	45
WP1946	Cori Cycle	pathway_Wikipathway	1.93471182918766	0.00399609706875243	0	6
WP195	IL-1 signaling pathway	pathway_Wikipathway	1.64237524593099	0.0610989707793654	0.00374635770726428	21
WP2018	RANKL/RANK (Receptor activator of NFKB (ligand)) Signaling Pathway	pathway_Wikipathway	1.59928223848702	0.06880638976641	0.00760777683747425	19
WP2035	Follicle Stimulating Hormone (FSH) signaling pathway	pathway_Wikipathway	1.73728215530112	0.0286442924339985	0.0029544394335322	12
WP2036	TNF related weak inducer of apoptosis (TWEAK) Signaling Pathway	pathway_Wikipathway	1.62052801428366	0.0596407920931451	0.00854577056654899	13
WP2038	Regulation of Microtubule Cytoskeleton	pathway_Wikipathway	1.58946179727312	0.0732681759076302	0.00903484870084112	10
WP2059	Alzheimers Disease	pathway_Wikipathway	1.59740938979316	0.0688028992248007	0.00442596566464244	22
WP2272	Pathogenic Escherichia coli infection	pathway_Wikipathway	1.81831852040798	0.0130551225504039	0	21
WP231	TNF alpha Signaling Pathway	pathway_Wikipathway	1.83616034224582	0.0113258366119721	0	34
WP2324	AGE/RAGE pathway	pathway_Wikipathway	1.93112247001353	0.00357298090853159	0	25
WP2359	Parkin-Ubiquitin Proteasomal System pathway	pathway_Wikipathway	1.80644928631329	0.0149265978744576	0.000416493127805568	31
WP2380	Brain-Derived Neurotrophic Factor (BDNF) signaling pathway	pathway_Wikipathway	1.71704727022148	0.0359488464914908	0	42
WP2431	Spinal Cord Injury	pathway_Wikipathway	1.98684841381487	0.00252694373465227	0	27
WP2636	Common Pathways Underlying Drug Addiction	pathway_Wikipathway	1.68196641043098	0.0446328782899628	0.00575060532600626	9
WP2637	Structural Pathway of Interleukin 1 (IL-1)	pathway_Wikipathway	1.76648134421769	0.0245348606794727	0.00112850895738066	17
WP2806	Human Complement System	pathway_Wikipathway	1.95424579870039	0.00403527449099511	0	22
WP2853	Endoderm Differentiation	pathway_Wikipathway	-1.99039650982826	0.0195141474442204	0	38
WP2865	IL1 and megakaryocytes in obesity	pathway_Wikipathway	1.75363964566246	0.0250343728130667	0.00137867647037704	8
WP2884	NRF2 pathway	pathway_Wikipathway	1.66303757936305	0.0544822848836095	0.0011726384363293	27
WP2895	Differentiation of white and brown adipocyte	pathway_Wikipathway	1.61210728416152	0.0639909768576426	0.0147631408152558	4
WP364	IL-6 signaling pathway	pathway_Wikipathway	1.53686506238015	0.0959716253537962	0.0182002022218402	15
WP3858	Toll-like Receptor Signaling related to MyD88	pathway_Wikipathway	1.78862711715331	0.0186406175030628	0.000747384155344188	17
WP3865	Novel intracellular components of RIG-I-like receptor (RLR) pathway	pathway_Wikipathway	1.54746786738707	0.0894439817384887	0.00931202223637081	21
WP3877	Simplified Depiction of MYD88 Distinct Input-Output Pathway	pathway_Wikipathway	1.63733733733576	0.0576130465309721	0.0122046628051628	11
WP3888	VEGFA-VEGFR2 Signaling Pathway	pathway_Wikipathway	1.65301761416713	0.0575566884257407	0	97
WP3937	Microglia Pathogen Phagocytosis Pathway	pathway_Wikipathway	1.9225304475837	0.0037022664019324	0	22
WP3942	PPAR signaling pathway	pathway_Wikipathway	1.56409765393274	0.0813694440284358	0.0131790891765736	7
WP3945	TYROBP Causal Network	pathway_Wikipathway	1.92071715252216	0.0033748550874758	0	29
WP395	IL-4 Signaling Pathway	pathway_Wikipathway	1.54827691646412	0.0902393155226561	0.0103438635713805	18
WP3971	Role of Osx and miRNAs in tooth development	pathway_Wikipathway	1.57389796258739	0.0781001912407645	0.020126413835641	7
WP408	Oxidative Stress	pathway_Wikipathway	1.63466079833085	0.0577856668231438	0.00766400980875782	7
WP4136	Fibrin Complement Receptor 3 Signaling Pathway	pathway_Wikipathway	1.70268543107101	0.0396818315540453	0.00372689326122139	14
WP4141	PI3K/AKT/mTOR - VitD3 Signalling	pathway_Wikipathway	1.54649235141167	0.0888221670571135	0.0235700817059129	9
WP4197	The human immune response to tuberculosis	pathway_Wikipathway	1.68723139380128	0.0433389350942257	0.00570107858155607	10
WP4217	Ebola Virus Pathway on Host	pathway_Wikipathway	1.85803667665868	0.00812147963090568	0	45
WP422	MAPK Cascade	pathway_Wikipathway	1.5518319994958	0.0886591705592701	0.0186725018207626	14
WP4290	Metabolic reprogramming in colon cancer	pathway_Wikipathway	1.9038115127135	0.00392263940204743	0	12
WP4301	Inhibition of exosome biogenesis and secretion by Manumycin A in CRPC cells	pathway_Wikipathway	1.69652257795995	0.0415970198403783	0.00390563974317987	8
WP4313	Ferroptosis	pathway_Wikipathway	1.53284831653432	0.0979539621094605	0.0182635164490124	13
WP4329	miRNAs involvement in the immune response in sepsis	pathway_Wikipathway	1.76360121714822	0.0241286829929862	0.00219619326468577	18
WP4396	Nonalcoholic fatty liver disease	pathway_Wikipathway	1.56669046537946	0.0822661758586965	0.000733048258920825	66
WP4478	LTF danger signal response pathway	pathway_Wikipathway	1.71546412572914	0.0350910467661419	0.0045030556441777	8
WP4496	Signal transduction through IL1R	pathway_Wikipathway	1.63173807105934	0.0552430320028179	0.0100449775097384	11
WP4577	Neurodegeneration with brain iron accumulation (NBIA) subtypes pathway	pathway_Wikipathway	1.5533603527436	0.0888949220142149	0.0140213934642929	18
WP4629	Computational Model of Aerobic Glycolysis	pathway_Wikipathway	1.60336188202496	0.0687511523795885	0.0172694688795586	5
WP465	Tryptophan metabolism	pathway_Wikipathway	1.58062951540006	0.0743713137595729	0.0162162162137813	15
WP4754	IL-18 signaling pathway	pathway_Wikipathway	1.63266619120754	0.0560805210692713	0	58
WP500	Glycogen Synthesis and Degradation	pathway_Wikipathway	1.6380326596222	0.0604552399401261	0.00763695109301851	13
WP524	G13 Signaling Pathway	pathway_Wikipathway	1.58370262807895	0.0746929077827769	0.0122950819654135	11
WP53	ID signaling pathway	pathway_Wikipathway	-1.82882531851787	0.0792607855843574	0.0043456032708728	4
WP534	Glycolysis and Gluconeogenesis	pathway_Wikipathway	1.69521573550651	0.0406661642878924	0.00369549149982328	16
WP581	EPO Receptor Signaling	pathway_Wikipathway	1.58774013215878	0.0731544334568497	0.0141481035499476	12
WP615	Senescence and Autophagy in Cancer	pathway_Wikipathway	1.58237391884553	0.074327857525975	0.00325309043549081	37
WP619	Type II interferon signaling (IFNG)	pathway_Wikipathway	1.86509731712688	0.00784854358928174	0	17
WP734	Serotonin Receptor 4/6/7 and NR3C Signaling	pathway_Wikipathway	1.63802112190818	0.0587791925047539	0.0101246105903233	8
WP75	Toll-like Receptor Signaling Pathway	pathway_Wikipathway	1.65087618385964	0.057102317213138	0.00052541704971425	36
WP78	TCA Cycle (aka Krebs or citric acid cycle)	pathway_Wikipathway	1.63992544191241	0.0609473939612233	0.00858704137258594	10

## Sheet: Female
geneSet	description	source	normalizedEnrichmentScore	FDR	Pvalue	NumGenes
GO:0014074	response to purine-containing compound	geneontology_Biological_Process_noRedundant	1.90735967899677	0.0635152779012861	0	27
hsa00982	Drug metabolism	pathway_KEGG	1.62289520277167	0.0925070171975045	0.0140120610120589	7
hsa04512	ECM-receptor interaction	pathway_KEGG	1.66050419762748	0.099538640678698	0.00403768505988599	26
hsa04713	Circadian entrainment	pathway_KEGG	1.60481964298066	0.0979690448664945	0.00664672648610058	10
hsa04724	Glutamatergic synapse	pathway_KEGG	1.8578227997104	0.0452135398056341	0.000165700082822585	19
hsa04726	Serotonergic synapse	pathway_KEGG	1.70286748616075	0.0774884333851635	0.00231864855874153	14
hsa04730	Long-term depression	pathway_KEGG	1.65000471562102	0.092865627126166	0.00721401580089076	13
hsa04913	Ovarian steroidogenesis	pathway_KEGG	2.02968107106878	0.00401643120100811	0.000176273576559797	7
hsa04918	Thyroid hormone synthesis	pathway_KEGG	1.84998045746938	0.0331259944768859	0.000682360968836172	14
hsa04921	Oxytocin signaling pathway	pathway_KEGG	1.61237673802269	0.0964618518695896	0.00142721217865093	31
hsa04925	Aldosterone synthesis and secretion	pathway_KEGG	1.84400950916142	0.0283445287614001	0.000679001867139874	20
hsa04927	Cortisol synthesis and secretion	pathway_KEGG	1.84285289999431	0.0255674534738459	0.00103986135163954	9
hsa04928	Parathyroid hormone synthesis, secretion and action	pathway_KEGG	1.76090410307561	0.0483884330407167	0.000327815112222945	23
hsa04972	Pancreatic secretion	pathway_KEGG	1.65376829407706	0.0973854162634043	0.00653370013642818	14
hsa05204	Chemical carcinogenesis	pathway_KEGG	1.72798507827314	0.0654432381813239	0.00471368715001507	7
hsa05414	Dilated cardiomyopathy (DCM)	pathway_KEGG	1.62657801571203	0.0949025315209629	0.00548719654049099	19
