# Supplementary material for: Sex-specific and multiomic integration enhance accuracy of peripheral blood biomarkers of major depressive disorder
Source: Research Square preprint supplement (doi:10.21203/rs.3.rs-3978037/v1), 2024-02-23
Supplement: Supplementary file 2 [file 218237804ed5d0b4f2d867fb.xlsx]

## Sheet: mrna_female
GeneID	baseMean	log2FoldChange	lfcSE	stat	pvalue	padj	symbol
ENSG00000179388	325.638221658723	2.98032815029073	0.300450412743903	9.91953421888322	3.42350024790053e-23	5.5758548537556e-19	EGR3
ENSG00000261026	19.4310990755087	5.81715765270793	0.607483105326121	9.57583445812053	1.01038057973852e-21	8.22803425110062e-18	CTD-3247F14.2
ENSG00000269688	38.7922921779385	1.26426116697494	0.140329074661973	9.00926034052681	2.07450884594593e-19	1.12625085246404e-15	AC008982.2
ENSG00000123689	1619.14522891151	2.32182625592273	0.26231485112531	8.85129547931532	8.65091865429475e-19	3.52243780306247e-15	G0S2
ENSG00000144655	1813.55342921772	1.00893898579938	0.117055367461562	8.61933124194999	6.7346275089324e-18	2.19373756475964e-14	CSRNP1
ENSG00000125740	1214.8123921138	2.13480770964545	0.267373248040781	7.98437287682513	1.41238488464352e-15	3.83391876936483e-12	FOSB
ENSG00000073756	7825.20546064094	1.40903970889426	0.186629707519166	7.54992186198198	4.35519455045976e-14	1.01332933776197e-10	PTGS2
ENSG00000258441	348.011385569713	0.606592340630367	0.0812215002645276	7.46837153530501	8.1193327512424e-14	1.65299465649356e-10	LINC00641
ENSG00000173334	2494.69837466485	0.803386639904913	0.109352455291549	7.34676361644528	2.03063519139061e-13	3.67477281801988e-10	TRIB1
ENSG00000142396	219.158295163006	0.697034466294411	0.0975177762073155	7.14776826752662	8.82000381088948e-13	1.43651402067957e-09	ERVK3-1
ENSG00000166260	441.377051616315	0.283044294429645	0.0413166608890053	6.85060913296034	7.35361870730414e-12	1.08880352623511e-08	COX11
ENSG00000178127	32.0337576529633	1.0337841043199	0.15371766229725	6.72521354326106	1.75335110045106e-11	2.3797357810872e-08	NDUFV2
ENSG00000186354	26.2279664441222	1.04946755873971	0.159523834586944	6.57875082715446	4.74417028149653e-11	5.94371549036415e-08	C9orf47
ENSG00000227155	115.176005055873	0.785423954510513	0.120134722652384	6.53785963932489	6.24054480469254e-11	7.2599823738591e-08	RP11-165F24.3
ENSG00000161960	129.195111298627	0.961055925706787	0.150304346738608	6.39406608365188	1.61531562962558e-10	1.75390971064746e-07	EIF4A1
ENSG00000108733	136.281964177307	-0.54284310908001	0.0852870014683285	-6.36489851600182	1.95418900316875e-10	1.98924226841309e-07	PEX12
ENSG00000042832	64.236131722796	0.745803620701948	0.117468977298101	6.34894112348761	2.16801981084305e-10	2.07709050936475e-07	TG
ENSG00000124659	1432.73995966799	-0.31714668222035	0.0509285053955932	-6.22729215705185	4.74565674622393e-10	4.29402841254162e-07	TBCC
ENSG00000139908	98.8380604853816	0.602453478414628	0.0970674014885343	6.20654791594262	5.4161112487394e-10	4.64274757411677e-07	TSSK4
ENSG00000170852	2905.50831370842	-0.218952527304486	0.0354085311035545	-6.18360944327641	6.26522615586489e-10	5.10208692002857e-07	KBTBD2
ENSG00000228363	29.2060032176346	1.16055760104547	0.188118308971679	6.16929637199852	6.85945505018373e-10	5.3199973524925e-07	AC015971.2
ENSG00000198783	983.225325152056	-0.305454089894072	0.0497852498528443	-6.13543350283338	8.49272850140865e-10	6.2873213228383e-07	ZNF830
ENSG00000144802	3044.59675804896	0.47164576624869	0.0773159821494376	6.10023636946221	1.0591172898012e-09	7.04909831025905e-07	NFKBIZ
ENSG00000268218	37.9107924538044	0.729189775576557	0.119639353470948	6.09489899787552	1.09506570214623e-09	7.04909831025905e-07	AC137932.4
ENSG00000218809	94.9200183924781	0.969338800458023	0.15913116631338	6.09144533352495	1.11895796595349e-09	7.04909831025905e-07	RP1-229K20.5
ENSG00000271933	20.3803883424765	1.12593245148513	0.18486573597849	6.09054157886854	1.12529352285096e-09	7.04909831025905e-07	RP11-338I21.1
ENSG00000263826	39.2931497630246	1.05962923779691	0.175290408796467	6.04499267856271	1.49416787006504e-09	9.01315262953677e-07	RP11-573D15.9
ENSG00000186594	430.820758820127	0.613433658202361	0.101952856108544	6.01683642436924	1.77858641984217e-09	1.03456560785605e-06	MIR22HG
ENSG00000163635	54.4628517979956	0.788696425616519	0.131455875453875	5.99970463772278	1.97676764541107e-09	1.1101936083038e-06	ATXN7
ENSG00000255423	77.4715504948646	0.810296225178041	0.135517376542609	5.9792791585164	2.24127184490851e-09	1.21678648460083e-06	EBLN2
ENSG00000270157	46.3967841055094	1.01857466263084	0.170694651252871	5.96723245370997	2.41311512091073e-09	1.2678195475572e-06	RP5-894A10.6
ENSG00000153234	185.30578230137	0.992407592725857	0.166489651208474	5.96077645380608	2.51042201811614e-09	1.27772635653305e-06	NR4A2
ENSG00000274008	75.6406429939065	1.30689461780419	0.219595744576638	5.95136586241127	2.65913909234738e-09	1.31240601203217e-06	Metazoa_SRP
ENSG00000104824	2497.36171555621	0.173101889306283	0.0291557489908342	5.93714431279751	2.90029362069052e-09	1.38932594706431e-06	HNRNPL
ENSG00000160613	1363.43813537619	0.325356706901842	0.0550105315976944	5.91444397013387	3.32998565817909e-09	1.50654101152119e-06	PCSK7
ENSG00000229097	44.2250440686008	0.772068615998332	0.130495607190679	5.9164337606414	3.28996879408852e-09	1.50654101152119e-06	CALM2P2
ENSG00000203668	442.996760920982	0.35192287085506	0.0606861826622193	5.799060929798	6.66873010901004e-09	2.93550289960666e-06	CHML
ENSG00000101413	780.823468266776	-0.23946859400753	0.0414327425535304	-5.77969449398965	7.48363946582174e-09	3.20752726262733e-06	RPRD1B
ENSG00000163154	1427.44465774135	-0.374354657620291	0.0653266131235976	-5.73050767092447	1.00130499135767e-08	4.1816036908314e-06	TNFAIP8L2
ENSG00000173825	372.246424443872	-0.630987001633887	0.110349227853036	-5.71809167957425	1.07727018916936e-08	4.38637489275033e-06	TIGD3
ENSG00000179456	4647.07729583453	-0.349373835734901	0.0614326404032143	-5.68710433804862	1.29211518916238e-08	5.13284880143602e-06	ZBTB18
ENSG00000163611	204.562775623245	0.379600143231943	0.0668173403413531	5.68116212487148	1.33782586194837e-08	5.18789757465551e-06	SPICE1
ENSG00000274213	204.437258665389	-0.763603081271072	0.135060278691693	-5.65379465130661	1.56943702018485e-08	5.7290460965855e-06	RP11-670E13.6
ENSG00000184277	850.094071344009	-0.241874150489429	0.0428055097779703	-5.65053778693482	1.59946640715362e-08	5.7290460965855e-06	TM2D3
ENSG00000155876	1050.0557349224	-0.154903804401553	0.0274236448999117	-5.64854908845658	1.61807650545179e-08	5.7290460965855e-06	RRAGA
ENSG00000234338	34.7513938503206	1.04911883302191	0.185544839586606	5.65426036832575	1.56518795481431e-08	5.7290460965855e-06	RP11-797H7.1
ENSG00000276842	142.4643423985	0.624878146701235	0.110860398309184	5.6366218796949	1.73418313000714e-08	6.0094980081758e-06	RP11-713N11.6
ENSG00000201217	12.1246991551871	1.2243748281937	0.217682159794784	5.62459886169799	1.85939543277213e-08	6.30916112782493e-06	Y_RNA
ENSG00000255163	59.6377413485376	0.864732780950916	0.154266805166778	5.60543650343995	2.07730768701231e-08	6.90471638742234e-06	HSPE1P18
ENSG00000235316	47.3416712036237	0.6536150856972	0.116796560548958	5.59618436215185	2.19120690114783e-08	7.13763735979894e-06	DUSP8P5
ENSG00000125245	374.37552359581	-0.485864153626801	0.0868959217130153	-5.59133436930939	2.25331176984722e-08	7.19601741088267e-06	GPR18
ENSG00000250251	130.377871374425	0.502740502552148	0.0899916320061842	5.58652500620946	2.31658204724369e-08	7.25580226989576e-06	PKD1P6
ENSG00000214293	195.103407016366	-0.398837794765022	0.0714660871040292	-5.58079798302734	2.3941759359021e-08	7.35734782415801e-06	APTR
ENSG00000189114	510.479771312163	-0.293653327608235	0.0527963556985533	-5.56199994721003	2.66700373410577e-08	7.62061224866329e-06	BLOC1S3
ENSG00000138670	284.063315695212	0.821046060236321	0.147501492652384	5.56635763796149	2.60119105236478e-08	7.62061224866329e-06	RASGEF1B
ENSG00000160321	72.3598404660784	0.954504238380813	0.171477993744745	5.56633663326882	2.60150446637979e-08	7.62061224866329e-06	ZNF208
ENSG00000252620	17.1500578661123	1.02404842641896	0.184033559134374	5.56446569438587	2.62956850766023e-08	7.62061224866329e-06	RNU6ATAC24P
ENSG00000231628	16.562845150666	1.11984614401665	0.201578332797103	5.55538945320982	2.76993473107863e-08	7.77826326984098e-06	RP3-355L5.4
ENSG00000182700	206.594619037226	-0.400119062309123	0.0728150374439749	-5.49500592672196	3.90697293143548e-08	1.07852318871677e-05	IGIP
ENSG00000013441	8288.49634581692	-0.367285862198553	0.0673307765305267	-5.45494766471364	4.89872713085857e-08	1.28686401258538e-05	CLK1
ENSG00000155926	9113.90041710023	-0.334859369106122	0.0613621439048725	-5.45710022168134	4.83973212854383e-08	1.28686401258538e-05	SLA
ENSG00000261267	13.0096664932741	1.45586550744928	0.266756593077569	5.45765520039436	4.82463388373362e-08	1.28686401258538e-05	RP11-44I10.3
ENSG00000237719	17.5227779059112	0.983728931951933	0.180965097405164	5.43601471254678	5.44854579388488e-08	1.40857881500005e-05	RP1-179N16.3
ENSG00000267046	53.6367086128651	0.74046112437616	0.136310793442424	5.43215328497755	5.56780622691583e-08	1.41691968777778e-05	E2F3P1
ENSG00000263847	15.5553038307838	0.977744434233823	0.180939191808911	5.4037183678062	6.5273404255252e-08	1.63555066939275e-05	RP11-143J12.3
ENSG00000236525	51.2873806225125	1.19686266676362	0.222295054301318	5.38411738635126	7.28009834714836e-08	1.79652972393947e-05	AC007278.2
ENSG00000230733	138.322064133271	-0.389267795999372	0.0723657111845684	-5.37917460669387	7.48281088304976e-08	1.81899314704823e-05	AC092171.4
ENSG00000243544	9.6435111895482	1.22218260393824	0.227804201335598	5.36505734649618	8.0923504531712e-08	1.93823693868822e-05	RN7SL172P
ENSG00000179144	7868.59526562903	-0.302710865685604	0.0565847300241927	-5.34969179063293	8.81041475714185e-08	2.07964094419666e-05	GIMAP7
ENSG00000225808	22.6414850921769	0.955196249126536	0.17881334831492	5.34186210441223	9.19966276027315e-08	2.14049867680813e-05	DNAJC19P5
ENSG00000129197	494.396652033478	0.253801369337885	0.0476655946968997	5.32462399665377	1.0116207546593e-07	2.31118293952891e-05	RPAIN
ENSG00000242294	133.212435971056	0.48413188358307	0.090954012617606	5.32282050730939	1.02170548072746e-07	2.31118293952891e-05	STAG3L5P
ENSG00000188186	2913.46607904963	-0.312962251227885	0.0588666672288179	-5.31645948311264	1.05805768650989e-07	2.35673935963805e-05	LAMTOR4
ENSG00000168970	102.89028509782	0.556144618944092	0.104650935248265	5.31428235805767	1.07078475233754e-07	2.35673935963805e-05	JMJD7-PLA2G4B
ENSG00000111615	721.293791251497	0.235847106774774	0.0445048710844075	5.29935490269073	1.16212546810082e-07	2.52367166652773e-05	KRR1
ENSG00000215417	59.5855933319878	-0.599483999349247	0.113260911813264	-5.29294696424157	1.20360834867139e-07	2.57936436510671e-05	MIR17HG
ENSG00000147118	665.867534184522	-0.245488666834134	0.0464239675240826	-5.28797256948764	1.23679519351421e-07	2.61606276841116e-05	ZNF182
ENSG00000204152	115.094340422402	0.422824137499228	0.0801380624956242	5.27619615862707	1.31892907137689e-07	2.75402535711737e-05	TIMM23B
ENSG00000230224	33.0268213261177	0.739820217671072	0.140455927873298	5.26727656762517	1.38462526977672e-07	2.85460655301942e-05	PHBP9
ENSG00000066379	300.679584590008	-0.328650358451772	0.0624413730187864	-5.26334291773008	1.414593742084e-07	2.86746768032792e-05	ZNRD1
ENSG00000232354	25.8418833557241	0.720059470710074	0.136845118857633	5.26185717635417	1.42607528769302e-07	2.86746768032792e-05	VIPR1-AS1
ENSG00000235314	117.457680185594	-0.381751854519669	0.072702206885013	-5.25089774954774	1.51359687958553e-07	3.00633565583044e-05	LINC00957
ENSG00000230565	18.5840444383642	0.852707279973391	0.162685473576583	5.24144695421738	1.59322280432586e-07	3.12636383301871e-05	ZNF32-AS2
ENSG00000110848	899.27589827129	0.638876420698244	0.121993176973082	5.23698485890906	1.63221077048436e-07	3.16474009748557e-05	CD69
ENSG00000272455	53.5736375564305	-0.61899933240092	0.118803672828799	-5.21027100982748	1.88564985188169e-07	3.52098557107528e-05	RP4-758J18.13
ENSG00000116863	589.536465547563	-0.291069413686503	0.0558821622127759	-5.20862833793425	1.90241745106296e-07	3.52098557107528e-05	ADPRHL2
ENSG00000110344	1718.5646416946	0.315172613024898	0.0604469263856258	5.21403869262484	1.84772901114538e-07	3.52098557107528e-05	UBE4A
ENSG00000243650	37.4347643146141	0.882390978727394	0.16930344830391	5.21189017451936	1.86926205311399e-07	3.52098557107528e-05	RN7SL834P
ENSG00000186017	198.361332536304	-0.318122750863596	0.0612319829719913	-5.19536907712283	2.04314083594805e-07	3.73894772978494e-05	ZNF566
ENSG00000140379	4262.48147925738	0.454419983889654	0.087737322021115	5.17932361532863	2.2269185970302e-07	4.02998035442564e-05	BCL2A1
ENSG00000261505	122.15589547237	0.567035191015863	0.109537840204784	5.17661467448854	2.25948195547911e-07	4.04397611086685e-05	LA16c-358B7.3
ENSG00000187726	27.2012745223225	0.833668435647449	0.161755898793957	5.15386728931207	2.55168557365862e-07	4.51731553675847e-05	DNAJB13
ENSG00000112149	324.859844072633	0.709200669891663	0.137734355455895	5.1490470009769	2.61813275786064e-07	4.58511056207271e-05	CD83
ENSG00000270060	31.1328670869663	0.585145530582865	0.113919658354786	5.13647546905836	2.79938872149167e-07	4.85038767095051e-05	RP11-390K5.6
ENSG00000159882	552.503111158391	-0.300286118892832	0.0585968129225454	-5.12461521226004	2.98145995607358e-07	5.11147771627057e-05	ZNF230
ENSG00000214029	226.23610593093	0.41089192691721	0.0803164557955147	5.11591208610274	3.12228471223948e-07	5.29715115710879e-05	ZNF891
ENSG00000152518	21814.4880526111	-0.238207731995704	0.0466098162973398	-5.11067734050045	3.21005823077591e-07	5.3899194231595e-05	ZFP36L2
ENSG00000235532	254.748767186648	0.532009754253414	0.104281375096577	5.10167567085405	3.36659325349222e-07	5.59507186934977e-05	LINC00402
ENSG00000166848	2871.53279409698	-0.134804978578186	0.0265189720366883	-5.08334102813964	3.70852979687453e-07	6.10109341431267e-05	TERF2IP
ENSG00000164011	176.427762270996	-0.277889153995557	0.0547451715787673	-5.07604864468697	3.85364673418895e-07	6.12927931935592e-05	ZNF691
ENSG00000073584	181.344715683215	0.356048041445306	0.070158086732436	5.07493944074013	3.87619432611076e-07	6.12927931935592e-05	SMARCE1
ENSG00000260007	80.9541916585923	0.734075135141258	0.144632443768044	5.07545275469823	3.86574404124365e-07	6.12927931935592e-05	RP11-315D16.2
ENSG00000178440	15.5340373195286	0.788130679462138	0.155194204619604	5.07835122705724	3.80724385817246e-07	6.12927931935592e-05	LINC00843
ENSG00000205476	170.12698318027	0.41385635117899	0.0817959115399291	5.05962148214418	4.20089566830332e-07	6.57884497592848e-05	CCDC85C
ENSG00000175793	36.9917308496247	0.871544969800912	0.172396183630305	5.05547716572367	4.29315995720247e-07	6.65930440218635e-05	SFN
ENSG00000265625	51.9060819964925	0.553040752837975	0.10966712240265	5.04290384138513	4.58519701939673e-07	7.04519847687873e-05	RP11-68I3.11
ENSG00000111961	215.327403898729	0.583702937864248	0.115892110741714	5.03660632400708	4.73857946671899e-07	7.21282652097684e-05	SASH1
ENSG00000220804	75.5141136858176	0.400635670514778	0.0796137637853007	5.03224130434528	4.847785329373e-07	7.24365868435762e-05	AC093642.5
ENSG00000269951	9.55234571156155	1.00714964526618	0.200111855181595	5.03293342791824	4.83030901990097e-07	7.24365868435762e-05	RP11-797A18.6
ENSG00000126746	601.387808761796	0.26143642261372	0.0522303619206587	5.0054491870238	5.57319136423527e-07	8.2518697953909e-05	ZNF384
ENSG00000170917	33.9454508216243	0.66145463364205	0.132976605165511	4.97421808008081	6.55115265199659e-07	9.61248858045662e-05	NUDT6
ENSG00000178988	2796.03602664284	-0.182818867239673	0.0367668728407551	-4.97238011052775	6.6135870985915e-07	9.61745473881784e-05	MRFAP1L1
ENSG00000260719	159.531669390701	0.297707839140851	0.059921530106889	4.96829501198976	6.75441504318141e-07	9.73532369984917e-05	AC009133.17
ENSG00000173517	528.85618338359	0.27104460168071	0.0545824978240588	4.96577863758443	6.84259699127158e-07	9.77591028042458e-05	PEAK1
ENSG00000103343	190.394544070672	-0.250142007039912	0.0504258870101762	-4.96058714821282	7.02804215946162e-07	9.95354110010013e-05	ZNF174
ENSG00000149925	73.7797720991321	0.533817361340849	0.107705641022656	4.95626186588093	7.1862347637036e-07	0.00010089845310038	ALDOA
ENSG00000135211	338.014389445805	-0.263245008061823	0.053151419202883	-4.95273714248338	7.31767940489199e-07	0.000101865849972202	TMEM60
ENSG00000175376	652.173711357736	-0.200678576507739	0.0405821280467609	-4.94499884965388	7.61443140892321e-07	0.000105098512167061	EIF1AD
ENSG00000159592	4269.92806638206	-0.10181985238459	0.0206086317802565	-4.94064106100126	7.78661357513335e-07	0.000106571912015292	GPBP1L1
ENSG00000106003	3314.11585247792	-0.304820181657532	0.0617971375798484	-4.93259386429787	8.11447635416294e-07	0.000110133730316877	LFNG
ENSG00000241343	178.292685139208	0.325605032139364	0.0660564978033417	4.92919005649875	8.25712185484329e-07	0.00011114358979325	RPL36A
ENSG00000230953	13.4446917509093	0.953748543087243	0.193658104368428	4.92490901012213	8.43996176845127e-07	0.000112673489608825	RP4-631H13.6
ENSG00000183161	409.118729755868	-0.244958136912356	0.0497994913103656	-4.91888833533866	8.7037101232753e-07	0.000114320424820794	FANCF
ENSG00000238018	24.2417261206651	0.871283520990059	0.177103113566387	4.91963977055355	8.67036354550262e-07	0.000114320424820794	AC093110.3
ENSG00000130772	468.557676791438	-0.398039915742469	0.0810260933702238	-4.91249052232777	8.99267314825594e-07	0.00011442474028566	MED18
ENSG00000160218	1774.51116711847	0.237800741932496	0.0483940433702383	4.91384322060472	8.93081752388514e-07	0.00011442474028566	TRAPPC10
ENSG00000239883	122.664887083355	0.376048954717766	0.0765335895854307	4.91351518666194	8.94577998619793e-07	0.00011442474028566	PARGP1
ENSG00000229807	2693.12664922875	0.898082927228011	0.182714653741527	4.91522113217293	8.86823025593417e-07	0.00011442474028566	XIST
ENSG00000154124	1105.49306628046	0.192322092173214	0.0391877112840937	4.9077143285803	9.21439358433615e-07	0.000116337076207816	OTULIN
ENSG00000275180	28.5850459768416	-0.688756842987392	0.140471026677849	-4.90319505222214	9.42902730459258e-07	0.000118131205930692	RP11-631N16.4
ENSG00000243406	27.5874870521756	0.711877234075845	0.145362978954729	4.8972388925625	9.71926523792277e-07	0.000120837918267212	MRPS31P5
ENSG00000185946	996.093504572445	0.382025021654089	0.0781450410248118	4.88866621149757	1.01521461817246e-06	0.000124321808166729	RNPC3
ENSG00000109321	52.4131772660814	1.4908294816948	0.304886166387283	4.88979050561799	1.00943349010623e-06	0.000124321808166729	AREG
ENSG00000179933	711.646072149152	-0.23914866744562	0.0489857466229712	-4.88200515317806	1.05012511292436e-06	0.000125760203780876	C14orf119
ENSG00000112031	233.51780662729	0.314217651905727	0.0643350738695245	4.88408006716491	1.03912846560096e-06	0.000125760203780876	MTRF1L
ENSG00000165995	30.6973771747649	0.606657622674712	0.124250806528758	4.8825246259814	1.04736154266879e-06	0.000125760203780876	CACNB2
ENSG00000252061	14.6944539593492	1.12324596488492	0.230161470868121	4.88025194072785	1.05950402688306e-06	0.000125957241502513	RNU6-415P
ENSG00000260822	1110.37714652107	-0.255279125672345	0.0523642090054759	-4.87506887854735	1.08770496423771e-06	0.000128372831540141	GS1-358P8.4
ENSG00000229124	586.325869263411	-0.280016510020955	0.0574946403844312	-4.87030631287817	1.11425377689808e-06	0.000129685031362763	VIM-AS1
ENSG00000018189	619.861545584913	0.261483120523538	0.0537031882502106	4.86904277089195	1.121401361786e-06	0.000129685031362763	RUFY3
ENSG00000164125	1258.1114497923	0.431608415600415	0.0886475803024408	4.86881214498904	1.12271071542639e-06	0.000129685031362763	FAM198B
ENSG00000124160	1123.75429562513	-0.155141905927317	0.0318849907422648	-4.86567197655385	1.14068572307167e-06	0.000129918520081597	NCOA5
ENSG00000267058	10.7555850865359	0.819293996922587	0.168339419407295	4.86691708814984	1.13352554684139e-06	0.000129918520081597	RP11-15A1.3
ENSG00000106993	487.187850231841	-0.217157619370384	0.0446860236434676	-4.859631752044	1.17604296500645e-06	0.000131294720992467	CDC37L1
ENSG00000152492	957.443096872615	0.374986274760779	0.0771479680946278	4.86061116089059	1.17023910208655e-06	0.000131294720992467	CCDC50
ENSG00000234750	14.0813612002271	0.842739640781227	0.17342182192198	4.85947864831198	1.17695273929515e-06	0.000131294720992467	CTD-2666L21.2
ENSG00000162971	274.687018923078	0.230149605084684	0.0474434934028028	4.85102568503288	1.22824637440465e-06	0.000136084685033527	TYW5
ENSG00000254317	37.4645683604159	0.662192282648944	0.136545580371739	4.8496061230701	1.23706871544821e-06	0.000136136068706115	RP11-473O4.5
ENSG00000244687	53.427903559693	0.553540324871495	0.114330664325722	4.84157358951828	1.28814953626206e-06	0.000140805983202015	UBE2V1
ENSG00000125384	1635.36437077314	0.264425332444662	0.0547046554700853	4.83368975039539	1.34025407803685e-06	0.000145524787793241	PTGER2
ENSG00000274536	4638.48920615745	-0.36979151144286	0.0765615810305234	-4.82998791907697	1.36541334636129e-06	0.000147274749484678	MIR223
ENSG00000228113	29.9958415746024	0.829124636982317	0.171827060105847	4.82534378736137	1.39761973642213e-06	0.000149756793730968	AC003991.3
ENSG00000135966	777.691899831705	0.209932906846419	0.0436138981427904	4.81344057252361	1.48353731462124e-06	0.000157924001589779	TGFBRAP1
ENSG00000277978	105.66252888627	-0.50776477194696	0.105536379802443	-4.81127714345957	1.49968891485076e-06	0.000158606710105028	RP11-403P17.6
ENSG00000121067	1905.70092500169	-0.160594642416275	0.0334147881852988	-4.80609488007858	1.53906880517969e-06	0.000161721378257817	SPOP
ENSG00000175592	14.2865222008236	0.983633814546931	0.204735790592297	4.80440577439488	1.55211772927172e-06	0.000162047060619542	FOSL1
ENSG00000259657	9.75092362848363	1.02820151299689	0.214075875328386	4.80297703522013	1.56323820296221e-06	0.000162168538927678	PIGHP1
ENSG00000271993	13.8792576608729	-1.03425880725408	0.215422258647403	-4.8010767956292	1.57814729535803e-06	0.000162679018984153	RP11-285J16.1
ENSG00000273174	43.5080768336129	0.677442943190349	0.141179609863468	4.79844748009638	1.59900223476027e-06	0.000163792134575726	RP11-434H6.6
ENSG00000100711	400.905266048447	-0.210554452125588	0.0439239658969336	-4.79361204813901	1.63804901245472e-06	0.000165707479912112	ZFYVE21
ENSG00000131503	116.821193806495	0.359051669463262	0.0748903714085404	4.79436358386542	1.63192067436712e-06	0.000165707479912112	ANKHD1
ENSG00000169429	8762.06243470418	0.859244319534041	0.179441598110685	4.78843439080404	1.68087498206096e-06	0.000168990190326092	CXCL8
ENSG00000120696	617.171747963117	-0.401596416713798	0.084009372448745	-4.78037634382779	1.74967350573552e-06	0.000174284847462222	KBTBD7
ENSG00000198841	148.225222082477	-0.311703991742806	0.0652131498418887	-4.7797720628208	1.75494044230395e-06	0.000174284847462222	KTI12
ENSG00000271971	47.4016630530715	-0.668319561330642	0.140121249980466	-4.76958035575483	1.84610092020786e-06	0.000180044584954643	CTD-2006H14.2
ENSG00000186130	548.393494840478	-0.317801679910951	0.0666078681321572	-4.77123332157093	1.83101288411926e-06	0.000180044584954643	ZBTB6
ENSG00000247287	95.8598494241817	0.476041180299241	0.0997926107526784	4.77030490242449	1.83947271383371e-06	0.000180044584954643	RP11-902B17.1
ENSG00000169252	663.712771459131	-0.364183685111911	0.0764654923992911	-4.76271941348654	1.91001337326208e-06	0.00018467593214102	ADRB2
ENSG00000267278	58.9952072162914	0.430798783797291	0.0904647947550799	4.76206003632258	1.91626650284475e-06	0.00018467593214102	MAP3K14-AS1
ENSG00000163660	9473.99817272243	0.291724868607861	0.0613203662320041	4.75738953521784	1.96112509915477e-06	0.000187887320529022	CCNL1
ENSG00000261087	125.537010846575	-0.459368380330927	0.0967524167380966	-4.7478749970082	2.05565014819192e-06	0.000195791660605858	KB-1460A1.5
ENSG00000163877	698.406676008672	-0.202900267110546	0.0427636408639058	-4.74469112104535	2.08824734087142e-06	0.000197740025818447	SNIP1
ENSG00000267571	16.4650069951378	0.687095396654702	0.144888576292721	4.74223306098717	2.11375250019851e-06	0.000198998190582273	AC104532.4
ENSG00000244720	53.9373134455508	0.731591789197397	0.154483903678152	4.73571531906376	2.18283814642687e-06	0.000204321177533646	RP11-402J7.2
ENSG00000255585	16.4800518022139	0.744763898748455	0.157387207718054	4.7320484907683	2.22265297095805e-06	0.000206859136788536	RP11-188C12.2
ENSG00000259436	113.050779142078	0.380982652709493	0.0806934597516056	4.72135726838646	2.34276007223194e-06	0.00021629005486141	CTC-378H22.2
ENSG00000197837	48.7621906404427	0.487231041706016	0.103211991054763	4.72068251689376	2.35054581632403e-06	0.00021629005486141	HIST4H4
ENSG00000225889	2630.0498910145	-0.517219431489164	0.109626328289186	-4.71802202592042	2.38148715869415e-06	0.000217906075020515	AC074289.1
ENSG00000175556	112.177001892622	0.361280934522004	0.0766014404898298	4.71637259314948	2.40086592292995e-06	0.000218451973669051	LONRF3
ENSG00000136709	1885.38199675313	-0.103811678364052	0.0220218218514842	-4.71403678878889	2.42856787008536e-06	0.000219744916111557	WDR33
ENSG00000251562	11447.0945274372	0.34356182808788	0.0729077179666651	4.71228338603278	2.44956406548976e-06	0.000220420165384705	MALAT1
ENSG00000198740	2745.99660331633	-0.202351637206134	0.0429524794619375	-4.71105835427844	2.46433654714128e-06	0.000220531040347747	ZNF652
ENSG00000258424	59.7878638897672	0.564147399467216	0.119854522210168	4.70693461593356	2.51469519591217e-06	0.000223807872436183	RP11-471B22.2
ENSG00000137947	1019.34786020599	-0.168054463887331	0.0357818439545987	-4.69664067901487	2.64475103977857e-06	0.000234103587961269	GTF2B
ENSG00000141854	135.088572758802	-0.433157776936273	0.0922689895922105	-4.69451089527094	2.6724536777683e-06	0.000235277043512499	MISP3
ENSG00000132825	802.62930486185	-0.319227744067766	0.0681344104636992	-4.68526463933881	2.79598429811384e-06	0.00024482901216871	PPP1R3D
ENSG00000145632	43.3262143578658	0.464414262305065	0.0992885361706168	4.67742078004876	2.905057475461e-06	0.000253019631565953	PLK2
ENSG00000113621	891.974759488284	-0.18884370692432	0.0403859322466855	-4.67597741141207	2.9255681100835e-06	0.000253450679834734	TXNDC15
ENSG00000229152	155.794711605792	0.556623351370344	0.119105415473462	4.67336727853794	2.96301207280328e-06	0.000255336389575381	ANKRD10-IT1
ENSG00000258682	76.2301431534816	0.483794342247232	0.103562468261306	4.6715219361761	2.98976162355603e-06	0.000256285513488722	CTD-2002H8.2
ENSG00000139826	1053.69065466423	0.202979110243819	0.0435486831606831	4.66097010315742	3.14722441884021e-06	0.000268370911568851	ABHD13
ENSG00000180884	294.409403852731	0.295461260586694	0.0634445728601949	4.65699818387564	3.20853274227072e-06	0.000270832400762788	ZNF792
ENSG00000235016	77.3949809421261	0.575873260892591	0.123675330470538	4.65633088427264	3.21894455648589e-06	0.000270832400762788	SEMA3F-AS1
ENSG00000139200	16.3953706831621	0.627420465071641	0.134758688688837	4.65588134743859	3.22597689862963e-06	0.000270832400762788	PIANP
ENSG00000213976	113.682686313775	0.339370644101365	0.0730519980694219	4.64560385848527	3.39083128559643e-06	0.000283212662300046	CTD-2561J22.2
ENSG00000261326	80.7739717752825	-0.534968580300103	0.115247193816347	-4.64192283200064	3.45181784252452e-06	0.000284408486834928	LINC01355
ENSG00000165572	229.786029535236	-0.402246741307225	0.0866810188075743	-4.64054007256403	3.4749977822896e-06	0.000284408486834928	KBTBD6
ENSG00000215301	24194.0249305269	0.195435061750531	0.0420927426008859	4.64296336315272	3.43447270027958e-06	0.000284408486834928	DDX3X
ENSG00000100221	1154.17969658796	0.199196703463338	0.04292391972426	4.64069229331716	3.47243873136312e-06	0.000284408486834928	JOSD1
ENSG00000119737	39.9804429485984	0.467951544786409	0.10088820764935	4.6383175565259	3.51256806827267e-06	0.000286045980639785	GPR75
ENSG00000100601	212.195391249946	-0.247169161435816	0.0533147494566782	-4.63603719335973	3.55152089559216e-06	0.000287779208092087	ALKBH1
ENSG00000198752	340.817141567785	0.345362664845532	0.0746672123220803	4.62535903116077	3.73950070590273e-06	0.000301511128698207	CDC42BPB
ENSG00000166595	551.595974512014	-0.204201409789271	0.0441649075595869	-4.62361229928455	3.77114426126109e-06	0.000302564662971229	FAM96B
ENSG00000118369	211.003335979499	0.279581261467368	0.0604846363015048	4.62235170058239	3.79414039346886e-06	0.000302917473472683	USP35
ENSG00000152464	173.836005243206	-0.323635373523328	0.0700668319230251	-4.61895257200827	3.85681992961467e-06	0.000302949671801654	RPP38
ENSG00000261468	136.725804195006	0.414253797154603	0.0896640914019402	4.62006351347067	3.83622590857288e-06	0.000302949671801654	RP11-1024P17.1
ENSG00000110844	34.5037532667487	0.477922210808027	0.103452686565359	4.61971773450357	3.8426244437552e-06	0.000302949671801654	PRPF40B
ENSG00000213782	40.8832348086068	0.617170724346207	0.133635879512908	4.61830106252711	3.86894650547947e-06	0.000302949671801654	DDX47
ENSG00000208028	13.5547193071326	1.01166520484537	0.219206922048977	4.61511523171395	3.92877271462946e-06	0.000306162302407512	MIR616
ENSG00000138031	178.198326632761	0.364065383769892	0.079229046730776	4.59509988813829	4.32542015045343e-06	0.000335467228525881	ADCY3
ENSG00000129235	382.005566395862	-0.254019286700138	0.0554145284173029	-4.58398355007605	4.56200143267164e-06	0.000350781122881123	TXNDC17
ENSG00000269954	83.2188369835267	0.620262362041177	0.135316108802001	4.58380282682208	4.56594818264862e-06	0.000350781122881123	RP11-148O21.6
ENSG00000162757	83.4372231809725	-0.342408142909159	0.0747910972913831	-4.57819386678004	4.69007922529477e-06	0.000354527398014722	C1orf74
ENSG00000205808	289.183783301515	-0.307281259776861	0.0671260916576924	-4.57767243985891	4.70178166459016e-06	0.000354527398014722	PLPP6
ENSG00000183977	33.5780299728745	0.680452524660423	0.148639487102768	4.57787185574694	4.6973028537471e-06	0.000354527398014722	PP2D1
ENSG00000086570	10.2907930661095	0.846716557164019	0.184853114244669	4.5804830533897	4.63903207291778e-06	0.000354527398014722	FAT2
ENSG00000186575	597.825084628407	-0.17378982243466	0.0380882491854491	-4.56281992875254	5.04711006401037e-06	0.000377074686296041	NF2
ENSG00000260669	11.3006766773588	0.82239387870625	0.180221153410215	4.56324833763735	5.03681770367054e-06	0.000377074686296041	AL136419.6
ENSG00000223697	17.893769015213	0.773683190415067	0.169605965819869	4.56165080441074	5.07530041078862e-06	0.000377449396303718	AF230666.2
ENSG00000166800	22.0705114675376	0.649664382395388	0.142574966026568	4.55665114641744	5.19756415059587e-06	0.00038478512418525	LDHAL6A
ENSG00000133574	11324.9108485325	-0.225977350768668	0.0496175134146771	-4.55438685288535	5.25385936618329e-06	0.000385448682419042	GIMAP4
ENSG00000226945	10.0309503305949	0.775645050853885	0.170292514962435	4.55478064332412	5.24402713012473e-06	0.000385448682419042	RP11-564A8.4
ENSG00000163528	175.561609110419	-0.270037436402328	0.059343237162562	-4.55043319700609	5.35355822435552e-06	0.000391001806278378	CHCHD4
ENSG00000204261	1802.62088617279	-0.242241760275044	0.0532524329980066	-4.54893319680084	5.39185545938008e-06	0.000392040847620194	PSMB8-AS1
ENSG00000139687	1400.81620276474	0.224104228757394	0.0494388907059377	4.53295423010935	5.81644218990128e-06	0.000415797015596202	RB1
ENSG00000147324	910.805622595958	0.296346066009386	0.0653577318641994	4.53421588474238	5.78178698853322e-06	0.000415797015596202	MFHAS1
ENSG00000038427	15469.4291680905	0.410915355843689	0.090653763054554	4.53279976470923	5.82069868950293e-06	0.000415797015596202	VCAN
ENSG00000262180	10.9221422073871	0.836876812132327	0.184532780988107	4.5351119061402	5.75729513501849e-06	0.000415797015596202	OCLM
ENSG00000124217	244.131376961952	-0.289410326747669	0.0639129445274935	-4.52819579644265	5.94894464894336e-06	0.000418964061387995	MOCS3
ENSG00000271725	27.0777220484323	0.731821331190257	0.161583218258225	4.52906767843142	5.92445217416748e-06	0.000418964061387995	RP11-761I4.4
ENSG00000231329	23.423537348435	0.777595274205164	0.171650666958159	4.53010342450175	5.89548192387031e-06	0.000418964061387995	RP1-225E12.2
ENSG00000224796	12.4646674906152	1.13626570675134	0.250968547406294	4.52752234690123	5.96792916080401e-06	0.000418964061387995	RPL32P1
ENSG00000267244	34.2274383978258	0.605374774692109	0.133762494880918	4.52574374626491	6.01834701190448e-06	0.000420690205076774	CTB-31O20.4
ENSG00000034533	348.173315843678	-0.238870322858617	0.0528554198308432	-4.51931559002066	6.2039858680794e-06	0.000431813324074398	ASTE1
ENSG00000162601	1966.58887887167	0.312250655076986	0.0691075005931765	4.51833234304262	6.23285982448033e-06	0.000431976970048132	MYSM1
ENSG00000163219	12453.1327040537	-0.218401155152152	0.0484979415786074	-4.50330772901276	6.69038973830602e-06	0.000461721939270297	ARHGAP25
ENSG00000175573	807.866418505869	-0.265732036813119	0.0590207271421237	-4.50235111765444	6.72058320173764e-06	0.000461848686104223	C11orf68
ENSG00000223117	10.2260735278369	0.997005257761413	0.221540209182825	4.50033545350063	6.78463073563346e-06	0.000464291095761605	RN7SKP296
ENSG00000072274	960.759522719521	0.273346780448367	0.0607549952985297	4.49916552713456	6.82207239148058e-06	0.000464899970878846	TFRC
ENSG00000140259	990.802307199149	-0.240060265846335	0.053375527716646	-4.4975717546202	6.87339672015939e-06	0.000466445884921817	MFAP1
ENSG00000166333	33.7988183258324	0.546331496390544	0.121505263653715	4.49636073337175	6.91264202011723e-06	0.000467162658015142	ILK
ENSG00000158480	493.922988057166	-0.216828325353177	0.0482442888122658	-4.49438328745866	6.97718579332673e-06	0.00046957613642939	SPATA2
ENSG00000205423	902.943324235698	-0.200127868484944	0.0446068581422601	-4.48648205275288	7.24088136794665e-06	0.000485317838846696	CNEP1R1
ENSG00000113240	1948.88596847472	-0.237440223954843	0.0529340965950915	-4.48558186930237	7.27152184060131e-06	0.000485374082860138	CLK4
ENSG00000230590	1185.60605874812	-0.331757800152305	0.0741988397135823	-4.47119929951649	7.77821690519813e-06	0.000515933313096669	FTX
ENSG00000236194	14.4679754952817	0.950989509751342	0.212711181587958	4.47080168824176	7.7926932536244e-06	0.000515933313096669	AC003104.1
ENSG00000100422	4277.16093200524	-0.136314450327881	0.0304988637935307	-4.46949274080158	7.84053199662216e-06	0.000516998966109252	CERK
ENSG00000211951	12.4969091222695	-1.38622550350532	0.310432833111221	-4.46546033682162	7.98967736492927e-06	0.000522601908604831	IGHV2-26
ENSG00000130921	491.49970854371	-0.182060124766456	0.0407672473838149	-4.46584296095341	7.97540971337866e-06	0.000522601908604831	C12orf65
ENSG00000161010	474.400808040729	0.256601185048137	0.0574967389977252	4.46288240900565	8.08644352310517e-06	0.000526815622643256	C5orf45
ENSG00000024862	841.233530601577	-0.20987430077357	0.0470428368812157	-4.46134448276381	8.14470422387213e-06	0.000528497201968946	CCDC28A
ENSG00000178252	1611.26065445407	0.216164119792314	0.0484968807036225	4.45727883228926	8.30066050695306e-06	0.000536479593955335	WDR6
ENSG00000121281	2332.70564004583	0.292669588034255	0.0656984462228266	4.45474139588659	8.39943757534698e-06	0.000540717943832713	ADCY7
ENSG00000173113	1024.53163189205	-0.165274417080889	0.0371080848606307	-4.45386545012015	8.43379641118261e-06	0.000540792291924926	TRMT112
ENSG00000116977	1928.02476900204	0.177152293123242	0.0398007800421314	4.45097540640451	8.54811321212592e-06	0.000545973019160372	LGALS8
ENSG00000163348	1259.79714119479	-0.179199778882608	0.0403213432926256	-4.44429089532297	8.81822257395073e-06	0.000561024965085686	PYGO2
ENSG00000265241	1822.92911248852	-0.135820763152017	0.0306395058496033	-4.43286402263488	9.29895164588348e-06	0.000589307492048655	RBM8A
ENSG00000151849	198.247411116896	0.285425208511695	0.0644129364925822	4.43117833239235	9.37195392584671e-06	0.000591631835621183	CENPJ
ENSG00000207697	11.6756816062969	0.915760742372941	0.206932061689639	4.42541738044643	9.62559919600551e-06	0.00060529781507854	MIR573
ENSG00000115325	1119.80177607651	-0.235832010745061	0.0533293593998207	-4.42217970362221	9.77101344937542e-06	0.00060973370134091	DOK1
ENSG00000189241	1599.42603663544	-0.155231986094705	0.0351024154155824	-4.42225938747782	9.76740954402357e-06	0.00060973370134091	TSPYL1
ENSG00000167778	1252.78977591528	-0.184126520834186	0.0416768324272485	-4.41795861419168	9.96374928731276e-06	0.000619387727642988	SPRYD3
ENSG00000173846	893.459826995439	0.399893337301089	0.0905420757910539	4.4166574910866	1.00238873590229e-05	0.000620756857096599	PLK3
ENSG00000270562	32.4910484764195	-0.707919107262324	0.160554782552366	-4.40920597946954	1.03750310825725e-05	0.000637653325440975	RP11-154H23.3
ENSG00000166439	1104.87034839423	0.374935186499882	0.0850326235283173	4.40930987358073	1.03700554205973e-05	0.000637653325440975	RNF169
ENSG00000257511	50.8814302275877	0.391420101045251	0.0888465684119802	4.40557365401263	1.05504294725711e-05	0.000645995657217164	RP11-278C7.1
ENSG00000122877	476.685663995874	1.08462833274421	0.246392870457291	4.4020280730169	1.0724367636296e-05	0.000654186425814058	EGR2
ENSG00000184293	94.41098924788	0.552296804331607	0.12554397297553	4.39922993706164	1.08635675101887e-05	0.000660204940441953	CLECL1
ENSG00000172315	475.092090993382	-0.209616661956933	0.0476770083396678	-4.39659847076709	1.09960487490796e-05	0.000665771918127357	TP53RK
ENSG00000100211	92.0490045749416	-0.344982996609039	0.078519670475646	-4.39358691292573	1.11495584467956e-05	0.000672566142307258	CBY1
ENSG00000272288	102.751474633299	-0.346598471478197	0.0789023972279624	-4.39274956978576	1.11926029618109e-05	0.000672671307893038	RP11-140K17.3
ENSG00000262332	18.9814063978747	-0.939109711985262	0.214085237278527	-4.3866159288857	1.15127815873809e-05	0.000686388797754148	RP11-517A5.7
ENSG00000184786	62.1092808011518	-0.515153172130334	0.117446585003703	-4.38627629840487	1.15307635191933e-05	0.000686388797754148	TCTE3
ENSG00000275131	269.631280355744	0.337229643408802	0.0768891928414582	4.3859173304648	1.15497984255926e-05	0.000686388797754148	CH17-472G23.4
ENSG00000149527	301.951309563314	0.429300112949739	0.0978981264642966	4.38517189709759	1.15894222006748e-05	0.000686388797754148	PLCH2
ENSG00000185670	198.491193099159	-0.333827407095773	0.0762125430290241	-4.38021608816597	1.1856167677031e-05	0.000699642764332625	ZBTB3
ENSG00000112079	7304.31329551454	-0.153831894175886	0.0351279478522059	-4.37918818437967	1.19122233957997e-05	0.00070041293302307	STK38
ENSG00000181631	9375.75297301266	-0.299443962340363	0.068417481139548	-4.37671713943401	1.20480161949571e-05	0.000705250904463871	P2RY13
ENSG00000154165	251.79024311139	1.07418797033443	0.245465896051083	4.37611899500241	1.20811077758593e-05	0.000705250904463871	GPR15
ENSG00000260495	15.934022198661	-0.985072440958613	0.225669528362867	-4.36511055836772	1.27058479183649e-05	0.000739071946594318	RP11-55K13.1
ENSG00000052802	261.833123450807	-0.236207866955852	0.0543366755245561	-4.34711665142457	1.37938866498899e-05	0.000799505451483122	MSMO1
ENSG00000009724	123.446152093056	0.358997320864367	0.0826902016706459	4.34147351936871	1.41530338261312e-05	0.000817412985553899	MASP2
ENSG00000214013	477.113125791527	0.209702050488515	0.0483361236219291	4.33841265652047	1.43515498887931e-05	0.000825949445366688	GANC
ENSG00000187808	351.714157826509	-0.470728902679535	0.108547508410053	-4.33661637723911	1.44692833148777e-05	0.000828433068913631	SOWAHD
ENSG00000249915	1270.41397970152	-0.157118011453055	0.0362339981019957	-4.33620410893606	1.4496434250653e-05	0.000828433068913631	PDCD6
ENSG00000206344	1229.74109250591	-0.494149417506357	0.114099854432051	-4.33085055161602	1.48534472292448e-05	0.000831046817786772	HCG27
ENSG00000260257	223.629668126419	-0.35461233889582	0.0818598927230353	-4.33194238472332	1.47799622928076e-05	0.000831046817786772	RP5-1085F17.3
ENSG00000204977	631.631614731189	-0.172764065857263	0.039889289399757	-4.33108908323433	1.48373633728299e-05	0.000831046817786772	TRIM13
ENSG00000116350	3528.61237994162	-0.0947777220202958	0.0218711490119679	-4.33345874825476	1.4678479539739e-05	0.000831046817786772	SRSF4
ENSG00000196700	369.897464463237	0.233338083800031	0.0538842975413676	4.3303540075083	1.48869818504402e-05	0.000831046817786772	ZNF512B
ENSG00000177932	173.963405759718	0.299265056807389	0.0690942658076891	4.33125749740705	1.48260174419006e-05	0.000831046817786772	ZNF354C
ENSG00000256594	157.049390105281	0.321825036232471	0.0743215505245971	4.33017118131787	1.48993473809626e-05	0.000831046817786772	RP11-705C15.2
ENSG00000146425	1948.46294641378	-0.219068264103006	0.0506870588906844	-4.32197623806632	1.54637846164098e-05	0.000859585870469167	DYNLT1
ENSG00000274460	52.0880654515999	-0.525586283853726	0.121704163692732	-4.3185563082351	1.5705315539798e-05	0.000870042429240442	CTD-2649C14.2
ENSG00000242689	10.3043746613766	0.943536879913199	0.218664698269226	4.31499408629504	1.59607175892169e-05	0.000881193923307038	CNTF
ENSG00000137955	1273.35172944342	0.190849709257481	0.0442441958368163	4.31355357799659	1.60651183972419e-05	0.000883961430188777	RABGGTB
ENSG00000127125	1205.32660363082	-0.139262160966068	0.0322914045499046	-4.31266966882305	1.61295016065368e-05	0.000884515800221095	PPCS
ENSG00000147649	3265.28846238544	0.177720846751158	0.0412510394031523	4.30827560523425	1.64532286222872e-05	0.000899240720037555	MTDH
ENSG00000111912	1047.52692414401	0.237414142601286	0.0551514185777284	4.30476946421031	1.67159715336738e-05	0.000907510094563152	NCOA7
ENSG00000278918	85.1267203291329	0.447927945275039	0.104042110249363	4.30525624866186	1.66792553484213e-05	0.000907510094563152	CTD-2267D19.1
ENSG00000125352	564.841761492987	-0.149432880881891	0.0347291248447488	-4.30281158969331	1.6864425513315e-05	0.000911790409866357	RNF113A
ENSG00000133026	185.124723294195	0.353597711397655	0.0821889048362543	4.30225602959586	1.69067786442954e-05	0.000911790409866357	MYH10
ENSG00000268403	26.8918169828069	-0.636118856322489	0.147914459385487	-4.30058602090191	1.70347029405337e-05	0.000912645417080503	CTD-2371O3.3
ENSG00000011243	751.963004654284	0.186344079544597	0.0433250087743167	4.30107424825412	1.69972091490104e-05	0.000912645417080503	AKAP8L
ENSG00000167978	15561.1902837848	0.254232246696083	0.0591558237030348	4.29767063970475	1.72602375844201e-05	0.000921696687008035	SRRM2
ENSG00000196659	68.7028644208842	-0.344564204289441	0.0801976174664336	-4.29643941023132	1.7356337900658e-05	0.000923799592771295	TTC30B
ENSG00000254909	20.6602015616816	0.599844225929184	0.139700097240239	4.2937996306305	1.75641000376404e-05	0.000931812694830781	RP11-110I1.5
ENSG00000114383	886.447819406124	-0.159640648724995	0.0371870838757218	-4.29290581801224	1.76349824154604e-05	0.000932535579872088	TUSC2
ENSG00000160714	2073.56220158034	-0.126100196981342	0.0293805666144505	-4.29195932931125	1.77103392714821e-05	0.000933489630144431	UBE2Q1
ENSG00000269553	26.424382067652	0.693422023642104	0.161602982297886	4.29089868133688	1.77951497061677e-05	0.000934934204078561	U62631.5
ENSG00000165030	2190.38181722191	0.321917126923412	0.0750654780397895	4.28848433833693	1.79896481198843e-05	0.0009421138229214	NFIL3
ENSG00000120253	1049.10469995858	-0.246157797792936	0.0574209681711483	-4.2868973762205	1.81185944349973e-05	0.000945825472957694	NUP43
ENSG00000104613	1325.02300969376	0.129819660627086	0.0303002424408918	4.28444296709281	1.83197593824247e-05	0.000953271313295692	INTS10
ENSG00000272054	30.3926258132669	0.614764995235737	0.14354119688121	4.28284707521631	1.84516992754488e-05	0.000957079064010303	RP11-423P10.2
ENSG00000139626	1017.62635149492	0.267559553662652	0.0624983234917676	4.28106769452616	1.85998762518995e-05	0.00095865881175534	ITGB7
ENSG00000240970	35.5377222584211	0.533172305069952	0.124522177961317	4.28174574038999	1.85432791687404e-05	0.00095865881175534	RPL23AP64
ENSG00000257093	1970.54275342478	0.211700208376272	0.0494685826561584	4.27948805098658	1.87323693939369e-05	0.000962441956842429	KIAA1147
ENSG00000231993	13.5142554500736	0.858407498827433	0.200845541942278	4.27396839644136	1.92024265427469e-05	0.000983490317929931	EP300-AS1
ENSG00000151093	174.081124919363	-0.267870070212078	0.0626921484065137	-4.27278498218202	1.93046590547843e-05	0.000985626902900538	OXSM
ENSG00000168092	1682.92517592659	-0.179147571258851	0.0419441752883503	-4.27109533152767	1.94515230123463e-05	0.000990021735319013	PAFAH1B2
ENSG00000157837	966.700794362137	-0.127927789512513	0.0299660226544289	-4.26909473398553	1.96267903044202e-05	0.000995830323015863	SPPL3
ENSG00000279140	19.3072184961218	-0.76811120998056	0.180118961966697	-4.26446611502558	2.00380749369542e-05	0.00101078346803674	RP11-477I4.4
ENSG00000196405	6712.68608310321	0.164170530655855	0.0384995821134129	4.26421591206466	2.00605393915303e-05	0.00101078346803674	EVL
ENSG00000264577	48.9524929885905	0.55166993808143	0.129387858478708	4.26369169849282	2.0107683652232e-05	0.00101078346803674	AC010761.8
ENSG00000279019	15.2122029117476	0.72941862663073	0.171266485277982	4.25896885457077	2.05372080022486e-05	0.00102919848225422	RP11-407G23.2
ENSG00000272994	71.0335366821422	0.358558770104895	0.0842334539587317	4.25672643413819	2.07441927991612e-05	0.00103638241754582	RP11-332H14.2
ENSG00000260051	12.4536363040311	0.755757869086749	0.177674576991432	4.25360725143695	2.10354115549434e-05	0.00104771788377787	LA16c-390E6.4
ENSG00000188211	57.7929331359978	0.511512360340374	0.120361775854666	4.24979073886393	2.13970317453866e-05	0.00106248004889363	NCR3LG1
ENSG00000120690	6595.27502058565	0.193142941906079	0.0454959467479908	4.24527800192681	2.18322568507593e-05	0.00108079625327756	ELF1
ENSG00000187650	319.712587657294	0.239523700869798	0.0564517221001594	4.24298306515474	2.20568086110436e-05	0.00108860376317596	VMAC
ENSG00000242338	13.171894801888	0.774988973386959	0.182964522791671	4.23573358136421	2.27806752238645e-05	0.00112093310384012	BMS1P4
ENSG00000272211	97.0052577602705	0.515810103611456	0.121964836616916	4.22917061932844	2.34554413828989e-05	0.00115065895723878	RP11-347P5.1
ENSG00000117318	195.192080988015	-0.482677251949809	0.114169002923899	-4.227743429375	2.36046736121186e-05	0.00115450245982155	ID3
ENSG00000165185	149.020574650111	0.335404269438137	0.0793782153092684	4.22539443764711	2.38522617897218e-05	0.00116311912505748	KIAA1958
ENSG00000168806	212.361883622157	-0.295236310355349	0.0699220041039977	-4.22236625134818	2.41750856714628e-05	0.00117184410812832	LCMT2
ENSG00000177971	325.717568756245	-0.184982327505784	0.0438065606973676	-4.22270830124539	2.41384137966188e-05	0.00117184410812832	IMP3
ENSG00000271843	18.8070140269687	0.623881882353549	0.147781214887299	4.22165890860577	2.42510895594689e-05	0.00117204004645421	RP11-245J9.5
ENSG00000110025	23.631374521992	0.615433756204144	0.146074660988102	4.21314519603281	2.51839055650916e-05	0.00120994179922905	SNX15
ENSG00000181227	12.8719506510966	0.783598053690647	0.185977183564085	4.21340961656531	2.51544273509798e-05	0.00120994179922905	RP4-682C21.2
ENSG00000134882	1703.44771575857	-0.11614676909224	0.0275917813884446	-4.20946974960024	2.55970709304651e-05	0.00122489349601149	UBAC2
ENSG00000142453	374.357644871923	0.186697535634543	0.0443562971538774	4.20904240466391	2.5645526010924e-05	0.00122489349601149	CARM1
ENSG00000140650	164.81789920363	0.282921915516049	0.0672996638325122	4.20391275980446	2.62340084655154e-05	0.00124222288088141	PMM2
ENSG00000216490	102.574242274858	0.606581258760605	0.144284522927287	4.20406323875982	2.62165638743985e-05	0.00124222288088141	IFI30
ENSG00000256249	33.4303906964942	0.751177067023232	0.178686373901118	4.20388556006471	2.62371628306751e-05	0.00124222288088141	RP11-324E6.6
ENSG00000159140	8651.04987067418	0.166823647516528	0.0397065066593604	4.2014183959243	2.65247859405659e-05	0.00125220054670724	SON
ENSG00000122696	189.299797120649	0.185400134344026	0.0441512306873747	4.19920648773767	2.6785198168983e-05	0.00125359345568456	SLC25A51
ENSG00000239653	138.368187943	0.512569817079816	0.122040846927334	4.1999857423557	2.66931788607261e-05	0.00125359345568456	PSMD6-AS2
ENSG00000237892	11.9455326269843	0.972857193086437	0.2316756570467	4.19922060646335	2.67835282607108e-05	0.00125359345568456	KLF7-IT1
ENSG00000030419	813.9684302621	0.406940989243805	0.0970123618218129	4.19473334739806	2.73192780999693e-05	0.0012749257375765	IKZF2
ENSG00000185022	315.11309565064	0.485264513467789	0.115746190217985	4.19248799942262	2.75911682049522e-05	0.00128393530444016	MAFF
ENSG00000187266	285.758822434483	-0.318357974784503	0.075965385602956	-4.19082944498494	2.77936532607137e-05	0.00128600917800353	EPOR
ENSG00000137656	592.563885801544	-0.178767336575723	0.0426511158381025	-4.19138709651344	2.77254150870904e-05	0.00128600917800353	BUD13
ENSG00000128595	894.767862466277	0.167814531621197	0.0400558570081767	4.18951294905364	2.79553830022912e-05	0.00128618452813084	CALU
ENSG00000090382	42089.4362897028	0.427695857250975	0.102083089329167	4.18968371805312	2.79343538724639e-05	0.00128618452813084	LYZ
ENSG00000176749	602.053089447706	-0.488378347529671	0.116594873689552	-4.18867770147458	2.80584555171286e-05	0.00128638059552482	CDK5R1
ENSG00000101363	301.17847604637	-0.256027363075584	0.0611306487737007	-4.18819967089455	2.81176086453512e-05	0.00128638059552482	MANBAL
ENSG00000154781	1016.05367392805	-0.150504781436495	0.0359473670154538	-4.18680960337909	2.82902947136286e-05	0.00129065554622092	CCDC174
ENSG00000272335	184.696319785655	-0.335074159760638	0.0800927204437384	-4.18357820666128	2.86956309126779e-05	0.00130048484416473	RP11-53O19.3
ENSG00000174276	74.3913093239373	-0.32562251230364	0.077820724940825	-4.18426470006857	2.8609060205135e-05	0.00130048484416473	ZNHIT2
ENSG00000247315	1128.47907401579	-0.168935380573601	0.0403843885362744	-4.18318530245564	2.87452903480877e-05	0.00130048484416473	ZCCHC3
ENSG00000152767	36.6213152404663	0.572907383098506	0.137227532751556	4.17487199260316	2.98153655684619e-05	0.00134516027427573	FARP1
ENSG00000168301	186.795671721268	-0.265544529559779	0.0636246548809693	-4.17361052970058	2.99810106311207e-05	0.00134619168428612	KCTD6
ENSG00000166326	2405.68678172677	0.169491572133577	0.0406165930423973	4.17296379232632	3.00662737206585e-05	0.00134619168428612	TRIM44
ENSG00000188529	3081.79866860021	0.180587047195734	0.0432770527285027	4.17281297616641	3.00861897881837e-05	0.00134619168428612	SRSF10
ENSG00000088833	2697.8691560601	-0.187595115327859	0.044983862207651	-4.17027587497706	3.0423112756085e-05	0.00135382851764578	NSFL1C
ENSG00000165630	174.16860025217	0.224041943371952	0.0537227926089926	4.17033315826642	3.04154662180957e-05	0.00135382851764578	PRPF18
ENSG00000180530	831.23973535368	0.326400960908234	0.0783286804284163	4.16706829635063	3.08542080123639e-05	0.00136927107873943	NRIP1
ENSG00000138433	4131.08311614452	-0.199907981999067	0.0480274270839462	-4.16237125610854	3.14959725019839e-05	0.00139395354385818	CIR1
ENSG00000140688	382.736881975721	0.224501399894425	0.054085742310596	4.15084253822735	3.3125360932768e-05	0.00146209418295933	C16orf58
ENSG00000105229	722.23305793732	-0.166719900368511	0.0401852118495417	-4.1487873945453	3.34241045374512e-05	0.00147129294757153	PIAS4
ENSG00000108591	361.371705148489	0.165913507216635	0.0400095149820979	4.14685125003072	3.37078897911558e-05	0.00147978544751632	DRG2
ENSG00000250318	98.333795274476	-0.410600281525581	0.0990658644451748	-4.14472011954044	3.40229001054456e-05	0.00148560582846486	CTA-963H5.5
ENSG00000278619	149.965651985243	-0.296984989190594	0.0716451567918786	-4.14522073073694	3.39486526187734e-05	0.00148560582846486	MRM1
ENSG00000204388	383.201057142551	-0.514970087510743	0.124270795425923	-4.14393491041678	3.41396681156971e-05	0.00148671864866406	HSPA1B
ENSG00000197992	172.48886412443	-0.525540165885504	0.126901169666497	-4.1413342939758	3.45291282641927e-05	0.00149568061712475	CLEC9A
ENSG00000090520	589.265710053712	0.174069734929682	0.0420314828948702	4.14141312513452	3.45172609945161e-05	0.00149568061712475	DNAJB11
ENSG00000135722	61.2373874708197	0.437233551031921	0.105733383726666	4.13524598968879	3.54574617818857e-05	0.00153181877995112	FBXL8
ENSG00000168564	875.326975585563	-0.175554332753471	0.0424900564988345	-4.13165684442634	3.60157814142471e-05	0.00153898458908068	CDKN2AIP
ENSG00000196214	833.784747442373	-0.154126358543374	0.0372887756923837	-4.13331775263552	3.57563843423687e-05	0.00153898458908068	ZNF766
ENSG00000084693	253.878248707124	0.200493736995992	0.0485286480110081	4.13145111626667	3.60480356860179e-05	0.00153898458908068	AGBL5
ENSG00000121350	411.062154321562	0.203792605187656	0.049324171620826	4.13169848556786	3.6009256208915e-05	0.00153898458908068	PYROXD1
ENSG00000196605	139.383143473892	0.253856961255187	0.0614495127762844	4.13114685187805	3.60957888517726e-05	0.00153898458908068	ZNF846
ENSG00000131375	1028.40803504034	0.17033852183165	0.041267260115425	4.12769157330074	3.66423131444635e-05	0.00155820719108062	CAPN7
ENSG00000169682	21.9187710959471	0.611416295469617	0.148261553698649	4.12390319821119	3.72505497396968e-05	0.00157994714481886	SPNS1
ENSG00000255026	511.819742863532	0.492105773976447	0.11937755711389	4.12226373092023	3.75167326581466e-05	0.00158710396052788	RP11-326C3.2
ENSG00000010244	3457.31668984909	0.137881364125718	0.0334599530949602	4.12078772897281	3.77579191672273e-05	0.00158905227254943	ZNF207
ENSG00000008853	251.949975506291	0.308758134563877	0.0749197507222045	4.12118475552226	3.76928986167863e-05	0.00158905227254943	RHOBTB2
ENSG00000162222	513.020261484071	-0.179639313940003	0.0436477817603601	-4.11565735290464	3.86077499274629e-05	0.00161998107928436	TTC9C
ENSG00000127980	721.001402805252	0.212030717221348	0.0515243443620767	4.11515604606914	3.86917566059811e-05	0.00161998107928436	PEX1
ENSG00000119231	938.47619751993	-0.141263972443815	0.0343435422399663	-4.11326156914073	3.90107936763138e-05	0.00162915076052852	SENP5
ENSG00000269958	253.95621274241	-0.276301295935597	0.0672797508084206	-4.10675266503834	4.01260495143883e-05	0.00166647869245127	RP11-73M18.8
ENSG00000164117	339.370721875333	-0.17448189305809	0.042491675959155	-4.10626055855764	4.02115875319795e-05	0.00166647869245127	FBXO8
ENSG00000253829	11.3994715344459	0.749205423802618	0.182435228693453	4.10669271043869	4.01364615865228e-05	0.00166647869245127	RP11-723D22.3
ENSG00000160633	4710.70428397494	-0.128926712827392	0.0314118191192694	-4.10440135090114	4.05363197085785e-05	0.00167567268805487	SAFB
ENSG00000139725	70.325680785573	0.429014666571006	0.104552383276846	4.103346601244	4.0721648700582e-05	0.00167907213262374	RHOF
ENSG00000275764	270.001056982533	-0.266999584121813	0.0651313493093277	-4.0994020076838	4.1421900365957e-05	0.00169186503900626	RP11-582E3.6
ENSG00000251034	118.013588778609	0.335413075180777	0.0817984659690044	4.10048124017233	4.12291859385329e-05	0.00169186503900626	RP11-582J16.4
ENSG00000266236	30.9437292443932	0.668178988524493	0.162999926621515	4.0992594436929	4.14474212908145e-05	0.00169186503900626	NARF-IT1
ENSG00000225920	17.0657925560348	0.702336978410222	0.17132003937333	4.09956115454615	4.13934284907682e-05	0.00169186503900626	RIMKLBP2
ENSG00000130755	11528.6070231139	-0.196788750180637	0.0480267288679219	-4.09748393903372	4.17665136912824e-05	0.00169638705359082	GMFG
ENSG00000090554	63.7703165742427	0.394270889818452	0.0962152564562415	4.09780012380641	4.17095191412564e-05	0.00169638705359082	FLT3LG
ENSG00000105732	382.820143108253	-0.269958204798776	0.0659553931179945	-4.09304216132591	4.25750269887496e-05	0.00172368226283956	ZNF574
ENSG00000204316	36.3037942224477	0.463393883276231	0.113226341080392	4.09263320579453	4.26502088736012e-05	0.00172368226283956	MRPL38
ENSG00000126777	3675.88510363863	0.18172825810092	0.0444241481375227	4.09075391920512	4.29973167616636e-05	0.00173340915370598	KTN1
ENSG00000187866	798.749603700211	-0.151977246360689	0.0371620953171762	-4.08957689450965	4.32160785460653e-05	0.00173496180307785	FAM122A
ENSG00000254428	45.9858446996224	0.546365636483114	0.13360530050464	4.08940090265461	4.32488789862839e-05	0.00173496180307785	RP11-110I1.11
ENSG00000204482	9269.01394248933	-0.260305920099162	0.0637064184468364	-4.08602345643382	4.38829437552568e-05	0.00175607249371466	LST1
ENSG00000175283	115.892243451262	-0.26984607706228	0.066083534164209	-4.08340868077285	4.43798738180973e-05	0.00176727385055098	DOLK
ENSG00000164323	823.140440965453	0.254739860262173	0.0623825434077813	4.08351193052507	4.43601507142748e-05	0.00176727385055098	CFAP97
ENSG00000132005	971.423855157871	-0.21525831766223	0.0527276755454215	-4.08245414643394	4.45626063803483e-05	0.00177022236613837	RFX1
ENSG00000129245	866.575622577043	-0.179986769057383	0.0441070949151088	-4.08067612260106	4.49048890228019e-05	0.00177737717631615	FXR2
ENSG00000278864	54.7515434476025	0.620473993223851	0.152062572612964	4.08038600532629	4.49609748045837e-05	0.00177737717631615	RP11-45M22.2
ENSG00000187764	13828.2115103393	-0.145167627028128	0.0355958521174414	-4.07821749986984	4.53823017294735e-05	0.00178968897885699	SEMA4D
ENSG00000124193	4578.99795217371	0.134262439470812	0.0329570605802789	4.07385965577139	4.62403529358042e-05	0.00181473886329022	SRSF6
ENSG00000152484	1012.15063067376	0.15537536703495	0.0381365572138461	4.07418441480445	4.61758816661092e-05	0.00181473886329022	USP12
ENSG00000243156	284.983591821554	0.401019758284483	0.0984705300084526	4.07248501912258	4.65141927808485e-05	0.00182109773514827	MICAL3
ENSG00000175938	300.125328814283	-0.252777142561169	0.0621134562814442	-4.06960355604432	4.70932040703464e-05	0.00182910793996321	ORAI3
ENSG00000101146	728.665025669059	-0.16342506365076	0.0401633044290323	-4.06901438947905	4.72124317966118e-05	0.00182910793996321	RAE1
ENSG00000090989	1765.24950531715	-0.122204433428826	0.030030413106837	-4.06935572261587	4.71433224880677e-05	0.00182910793996321	EXOC1
ENSG00000172175	2084.31620336612	0.16403767057993	0.0403119318573009	4.0692088675036	4.71730443008039e-05	0.00182910793996321	MALT1
ENSG00000204186	206.96866883226	0.389078767605978	0.0956277729036612	4.06867958744527	4.72803120724819e-05	0.00182910793996321	ZDBF2
ENSG00000107164	937.940039085132	0.129286119034278	0.031801829352983	4.06536735982298	4.79568627136385e-05	0.00185088488866595	FUBP3
ENSG00000145545	338.035393299199	0.210589527823704	0.0518312470018942	4.06298401070705	4.84493494690871e-05	0.00186547176076365	SRD5A1
ENSG00000134283	1870.45862049306	0.125418592195661	0.0308752010966466	4.06211418034401	4.86302794382986e-05	0.00186802207832917	PPHLN1
ENSG00000105186	929.729734052886	-0.146767200018226	0.0361482875368649	-4.06014254115217	4.90427666516406e-05	0.00187829810203088	ANKRD27
ENSG00000271254	137.902079696493	0.379309347417569	0.0934320465163992	4.0597349791647	4.91284454758491e-05	0.00187829810203088	AC240274.1
ENSG00000102760	750.613358645801	-0.224755034664194	0.0554231444329299	-4.05525592175992	5.00794416975467e-05	0.0019055678853405	RGCC
ENSG00000100650	13731.8817351995	0.203109182088125	0.0500919396037084	4.05472784034677	5.01927072395821e-05	0.0019055678853405	SRSF5
ENSG00000164306	249.52147488098	0.215748665507213	0.053198724661053	4.05552326454856	5.00221930920643e-05	0.0019055678853405	PRIMPOL
ENSG00000090104	178.166583299112	0.78498158851064	0.19365530076287	4.05349910598031	5.04571928426272e-05	0.00191115418564621	RGS1
ENSG00000168615	674.043474620981	0.251955122167771	0.0621792510001976	4.05207714977092	5.07649183685171e-05	0.00191390792932416	ADAM9
ENSG00000183458	67.5405002942729	0.518990202413272	0.128065398208777	4.05254041819474	5.06644676284207e-05	0.00191390792932416	RP11-958N24.1
ENSG00000182473	1264.33869897957	0.147011534895363	0.0362873924827255	4.05131162194548	5.09313219694491e-05	0.00191574697671228	EXOC7
ENSG00000136536	4349.49290225971	0.158879409256731	0.0392240460623289	4.05056145927077	5.10948870475399e-05	0.00191747102613659	MARCH7
ENSG00000173114	799.230541725956	0.55262951091872	0.136558111082399	4.04684501373385	5.19125881140216e-05	0.00194367890255878	LRRN3
ENSG00000123552	224.146741625368	0.290238283670133	0.0717571501365192	4.04472980208871	5.23835038019299e-05	0.00195233438540511	USP45
ENSG00000260618	26.6165912767563	0.569300884530019	0.1407469010218	4.04485555558941	5.23553941310606e-05	0.00195233438540511	RP11-23N2.4
ENSG00000107077	1411.99841820005	0.13402076755264	0.0331671737533538	4.04076538294398	5.32770379512839e-05	0.0019811030071063	KDM4C
ENSG00000090238	10817.9126332613	-0.258432982550284	0.0640014802852074	-4.03792195740847	5.39267863583721e-05	0.00200069605790161	YPEL3
ENSG00000278970	631.148078451832	-0.195031010163722	0.0483186078929973	-4.03635408113626	5.42882643249497e-05	0.00200497270081736	HEIH
ENSG00000164402	185.857840718923	0.265255978038379	0.0657092149922529	4.03681550707389	5.41816436735143e-05	0.00200497270081736	sept.8
ENSG00000141570	144.551017637688	-0.32815298285345	0.0813774736845915	-4.03247935817384	5.5191464127714e-05	0.00203371804581013	CBX8
ENSG00000196510	835.676399011215	-0.199189284197123	0.0494343534794362	-4.02936966253604	5.59266137166797e-05	0.00205615520903739	ANAPC7
ENSG00000255857	36.7440318426673	0.449189457401551	0.111769339620521	4.01889694371138	5.84712369744208e-05	0.00214486719955493	PXN-AS1
ENSG00000181800	106.799278316632	0.798355997802804	0.198725571902277	4.01737929427319	5.88489619688343e-05	0.00215387200805934	CELF2-AS1
ENSG00000106133	26.9757914028438	0.834309084872118	0.207781229093586	4.01532462057167	5.93640291786292e-05	0.00216785189065546	NSUN5P2
ENSG00000146414	486.047571303703	0.315877442212637	0.0786866333800995	4.01437231005648	5.96042002702118e-05	0.00217175304206027	SHPRH
ENSG00000110925	516.006978400776	-0.161912121741802	0.040369645638824	-4.0107392368609	6.05289327577653e-05	0.00220052394603956	CSRNP2
ENSG00000135976	266.905464901873	0.395227632523027	0.0986159564080126	4.00774526677829	6.13011866809452e-05	0.00222363569592997	ANKRD36
ENSG00000119820	1948.66274004192	-0.180759473949147	0.0451347213478674	-4.00488733620349	6.20470459695672e-05	0.0022456894171252	YIPF4
ENSG00000171497	946.366356052554	-0.14589359373152	0.0364662160123647	-4.00078784379633	6.31319409855101e-05	0.00227484496201549	PPID
ENSG00000196329	797.791201222044	0.334118656053046	0.0835084014254846	4.00101846460543	6.30704355361961e-05	0.00227484496201549	GIMAP5
ENSG00000264247	454.805953813451	-0.211587392094809	0.0529035785065681	-3.99949111322479	6.34788312482723e-05	0.00228229519766139	LINC00909
ENSG00000169282	30.412709046306	0.437542331910176	0.10949560670592	3.99598070711013	6.44269809728442e-05	0.00231128246498836	KCNAB1
ENSG00000273891	20.5678798706907	0.629863421427481	0.157691466638639	3.99427714672003	6.48919235235956e-05	0.00232284562292044	RP11-500G22.5
ENSG00000083750	226.070842103942	0.220651967248317	0.0552733939193535	3.99201047017773	6.55154793808053e-05	0.00234002327341047	RRAGB
ENSG00000180855	98.6363750475809	-0.327107252339214	0.0820389540085616	-3.98721870960322	6.68523931570218e-05	0.00238254907516064	ZNF443
ENSG00000128881	539.252160764038	0.242005899376013	0.060733600420722	3.98471188435326	6.75620492957874e-05	0.00240258318096177	TTBK2
ENSG00000149346	224.931231953977	-0.209411586532922	0.0525821449713758	-3.98256074655988	6.81766912031183e-05	0.00241840072045203	SLX4IP
ENSG00000234608	658.994468750603	-0.170544891592267	0.0428332333755555	-3.98160209146375	6.84523074923795e-05	0.00241840072045203	MAPKAPK5-AS1
ENSG00000188603	133.733084833419	0.281615012028343	0.0707278870830362	3.98166866907419	6.84331322091135e-05	0.00241840072045203	CLN3
ENSG00000124731	5857.06072193861	0.344778251517805	0.0867005319135678	3.97665670449999	6.98909484301489e-05	0.00246388285082648	TREM1
ENSG00000245060	372.186570647159	-0.24071231333831	0.0605646136144995	-3.97447121301675	7.05357924739811e-05	0.00248124503676831	LINC00847
ENSG00000003056	2495.9862544429	0.166784803877126	0.0419761946231968	3.97331881496848	7.08780776587919e-05	0.00248791217851022	M6PR
ENSG00000149016	194.5580229752	-0.278142782734637	0.070021587976828	-3.97224328626598	7.11989481657818e-05	0.00249380057801309	TUT1
ENSG00000196943	313.594810422516	0.210541791851016	0.0530157512449568	3.9713063930419	7.14795778916624e-05	0.00249825726420924	NOP9
ENSG00000233264	15.33712890171	0.755019835762468	0.190158596861782	3.97047437361592	7.17296714104796e-05	0.00250162988921302	AC006042.8
ENSG00000136527	3270.65552820688	0.131406974239709	0.033104729038373	3.96943210401722	7.20441311821887e-05	0.00250722812941091	TRA2B
ENSG00000122965	674.821729732485	0.17243855122575	0.0434640365314417	3.96738464686797	7.2665663477102e-05	0.00252177452684906	RBM19
ENSG00000177173	24.6855942696285	0.736321892373617	0.185610051941137	3.96703672388998	7.27717828709437e-05	0.00252177452684906	NAP1L4P1
ENSG00000162517	757.281207429859	-0.157530569058572	0.0397509575422402	-3.96293772020906	7.40330997738947e-05	0.00256003629727691	PEF1
ENSG00000048405	1111.62924498251	0.173948754241542	0.0439018921101414	3.96221542809904	7.42574901609932e-05	0.00256235538612732	ZNF800
ENSG00000013523	382.457627074826	0.192589935964035	0.0486262000787473	3.96062072817015	7.47551863126028e-05	0.002574075516857	ANGEL1
ENSG00000145428	472.888067448465	-0.299968094728205	0.0757628299154999	-3.95930425332272	7.51684254272752e-05	0.00258284418762454	RNF175
ENSG00000140945	33.1769444212489	-0.544693161220582	0.137637833321548	-3.95743777764997	7.57580127104681e-05	0.00259675072285642	CDH13
ENSG00000260565	412.853541311501	0.32423288833553	0.0819387469220532	3.95701545990161	7.58920208804356e-05	0.00259675072285642	CTD-2270P14.1
ENSG00000136897	545.925820736038	-0.191513605672067	0.0484233098041511	-3.9549879272327	7.65385166371325e-05	0.00261338117498737	MRPL50
ENSG00000108963	213.386867475497	0.259234748621004	0.0655735348991781	3.95334411999579	7.70664771101584e-05	0.00262590316463002	DPH1
ENSG00000135913	257.535058740965	0.32364605305434	0.0818841087441286	3.95248917058704	7.73424304148718e-05	0.00262980410055745	USP37
ENSG00000196470	181.847320673576	-0.247866702501547	0.0627791317104932	-3.94823400305356	7.87298293804142e-05	0.00266365299887228	SIAH1
ENSG00000160679	2626.37446995356	-0.11752390319942	0.0297677646055283	-3.948025817753	7.87983084133011e-05	0.00266365299887228	CHTOP
ENSG00000135821	23112.4578649534	0.270831437622291	0.068600803383488	3.94793390550116	7.88285593084323e-05	0.00266365299887228	GLUL
ENSG00000123136	1580.49443828999	0.180261142980954	0.0457425135161112	3.94077913793397	8.12173797840681e-05	0.00273545917772809	DDX39A
ENSG00000166503	371.021088246829	0.264398230482602	0.0670965075542273	3.94056621008054	8.12895095487441e-05	0.00273545917772809	RP11-382A20.3
ENSG00000238260	21.781207582483	-0.739788254520388	0.188038154100007	-3.93424546237002	8.34584596349632e-05	0.00280265553005082	RP11-46F15.2
ENSG00000267940	40.7622720020818	-0.572530478347429	0.14555512947451	-3.93342701431689	8.3743274816523e-05	0.00280643357394385	RP11-290F24.6
ENSG00000196757	728.93812011101	-0.212847727064125	0.0541505388572345	-3.9306668327953	8.47105893768015e-05	0.00283302129195065	ZNF700
ENSG00000198690	277.593141734658	0.243788828604578	0.0620917009929016	3.926270736768	8.62730453611367e-05	0.00286761038734048	FAN1
ENSG00000065621	41.6341717304481	0.45778657201278	0.116576726895406	3.92691220798737	8.60433696881026e-05	0.00286761038734048	GSTO2
ENSG00000261499	13.7830552806849	0.772588253641725	0.196767131171743	3.9264090960771	8.62234575352026e-05	0.00286761038734048	CH17-260O16.1
ENSG00000161217	2722.11974040775	-0.134470299122858	0.034261211603267	-3.92485533436405	8.67818742099623e-05	0.00287864844247995	PCYT1A
ENSG00000166411	328.389121858581	0.201859653630134	0.0514569213790185	3.92288633327453	8.74944360658983e-05	0.0028963859353766	IDH3A
ENSG00000198799	630.654170191756	-0.149579120414535	0.0381432578361175	-3.92150877770331	8.79962423283312e-05	0.00290708884138241	LRIG2
ENSG00000179010	4503.05898156087	-0.139424778884104	0.035563938715251	-3.92039756902162	8.84030056008894e-05	0.00291461488303985	MRFAP1
ENSG00000186591	3079.85761116608	-0.111744841284069	0.0285503984343636	-3.9139503268568	9.07983220916472e-05	0.00298753994324578	UBE2H
ENSG00000049883	238.643336983465	0.218216946136426	0.0557892519184592	3.91145137517472	9.17431287106215e-05	0.00301254100264091	PTCD2
ENSG00000107036	1208.20170264669	0.172377128507563	0.0440801944447219	3.91053466707662	9.20920409125513e-05	0.00301791362241996	RIC1
ENSG00000225873	335.489931209014	-0.365175394201132	0.0934055499130076	-3.90956848432706	9.2461140251054e-05	0.00302084882211303	LINC00694
ENSG00000235602	47.4418328808669	0.606739744506472	0.155203010570736	3.90932973706681	9.25525610753608e-05	0.00302084882211303	POU5F1P3
ENSG00000115232	6896.43929279936	0.253909207804099	0.0649683992333423	3.90819553506547	9.2988035739992e-05	0.0030289922761945	ITGA4
ENSG00000104447	654.922936749487	0.264521373715408	0.0677194469099481	3.90613606261674	9.37837174895778e-05	0.00304614136951696	TRPS1
ENSG00000215068	114.601634296769	0.294964276117159	0.0755275844615525	3.90538474413029	9.40755884366078e-05	0.00304614136951696	AC025171.1
ENSG00000267554	164.389590551162	0.415002637660788	0.106251655025163	3.90584633775826	9.38961678695004e-05	0.00304614136951696	RP11-686D22.10
ENSG00000211787	99.0902653931879	0.339722671690861	0.0870667870581977	3.90186296255289	9.54551954446578e-05	0.00307248768420384	TRAV8-3
ENSG00000260853	37.3774661667962	0.502697637210584	0.128816113064749	3.90244376460813	9.52263667439058e-05	0.00307248768420384	RP11-264B17.2
ENSG00000248592	14.448085435852	0.592274420841562	0.151791637755591	3.90189097106402	9.54441485382283e-05	0.00307248768420384	TMEM110-MUSTN1
ENSG00000226328	487.563364875769	-0.386265047390049	0.0990572671373713	-3.89941150763206	9.64267710007503e-05	0.00309604871305702	NUP50-AS1
ENSG00000248544	20.291385264987	0.637221647341037	0.163429611752605	3.89905868653499	9.65673694500502e-05	0.00309604871305702	CTB-47B11.3
ENSG00000246596	74.8509080925111	0.539746840077508	0.138462093512535	3.89815599623766	9.69279712603557e-05	0.00310150465209708	RP11-1277A3.2
ENSG00000166912	2512.84231941078	-0.191320948249872	0.0491093900761386	-3.89581194051179	9.78703083673164e-05	0.00311940061130819	MTMR10
ENSG00000213906	71.5980055755044	0.409950893438721	0.105216083087329	3.89627594384464	9.76830898289443e-05	0.00311940061130819	LTB4R2
ENSG00000140400	1050.0513901724	0.307821511629426	0.0790746223675975	3.892797744875	9.90947650146025e-05	0.00315225866756412	MAN2C1
ENSG00000100307	1864.08880084751	-0.176508710228761	0.0453631276445971	-3.89101720700654	9.98248527156827e-05	0.0031692931309558	CBX7
ENSG00000129749	61.0153593505645	-0.377707514676078	0.0972516817696636	-3.88381473515966	0.000102830272465353	0.00324524542273553	CHRNA10
ENSG00000173914	355.595882376298	-0.199495657550324	0.0513586005529932	-3.88436708559609	0.000102596799638104	0.00324524542273553	RBM4B
ENSG00000101246	852.860589359921	-0.175396446546237	0.0451659184711885	-3.88338048872233	0.000103014175941197	0.00324524542273553	ARFRP1
ENSG00000003756	4724.86031038356	-0.161980470950659	0.0417067207301479	-3.88379781759179	0.000102837431255061	0.00324524542273553	RBM5
ENSG00000269399	33.2589864604661	-0.511291604535961	0.131686203238923	-3.8826512721937	0.000103323697820999	0.00324871248341817	CTD-3222D19.12
ENSG00000143878	4956.11256222032	-0.341830772286479	0.0880662310541604	-3.88151926334004	0.00010380592761163	0.00325758601736148	RHOB
ENSG00000170915	822.759765964807	-0.203712644302669	0.0525072940074501	-3.87970182340315	0.000104584592622145	0.00326533426746339	PAQR8
ENSG00000205269	2021.0796777957	0.26630983305592	0.0686323865862793	3.88023564824074	0.000104355310512919	0.00326533426746339	TMEM170B
ENSG00000136826	1347.8545570665	0.369116237988666	0.0951443369053426	3.87953976026858	0.000104654294076005	0.00326533426746339	KLF4
ENSG00000265666	185.481607681342	-0.295247535475202	0.0761232580349611	-3.87854570464658	0.000105082785792912	0.00326618956528465	RARA-AS1
ENSG00000267023	131.616665620993	0.265949947250903	0.0685652489000752	3.87878628776642	0.000104978929863191	0.00326618956528465	LRRC37A16P
ENSG00000070214	893.076922085368	0.168090804541123	0.0433813817831998	3.87472223409488	0.000106746388467452	0.00330764239472386	SLC44A1
ENSG00000232334	12.3394331865437	0.615538399773809	0.158867134113945	3.87454839672707	0.000106822613103994	0.00330764239472386	RP11-47G11.2
ENSG00000108518	18770.6173153576	-0.13430658368645	0.034689934273274	-3.87162981135778	0.000108110056422248	0.00333482668361584	PFN1
ENSG00000259318	11.5824136515984	0.766416022689422	0.197955675927982	3.87165469793475	0.000108099016857299	0.00333482668361584	RP11-454L9.2
ENSG00000135999	1574.93422695508	0.169323863787439	0.0438153564215777	3.86448673744104	0.000111323038191054	0.00342744484502401	EPC2
ENSG00000235027	13.831128566008	0.636186596495442	0.164801040144076	3.86033119657049	0.000113233442729391	0.00347659744608605	AC068580.6
ENSG00000211891	31.2767806571705	1.12161689440333	0.290567737573926	3.86008750926096	0.00011334642622163	0.00347659744608605	IGHE
ENSG00000227825	172.201820711848	0.344184698183504	0.0892667166715787	3.85568900724549	0.000115404124964433	0.00353305823927767	SLC9A7P1
ENSG00000105643	2422.85072520661	-0.165295317329644	0.0428856388463018	-3.85432797030371	0.000116047946724255	0.00354610301744454	ARRDC2
ENSG00000163545	3258.12216344968	-0.336086706096631	0.0872522608676486	-3.85189681911435	0.000117206410340909	0.00355552496715842	NUAK2
ENSG00000221909	190.493566427537	-0.26027139092724	0.0675578710103982	-3.85256946429203	0.000116884802774636	0.00355552496715842	FAM200A
ENSG00000269867	129.863837378452	-0.252474445813963	0.0655463058852175	-3.85184858863118	0.000117229502508999	0.00355552496715842	CTD-2583A14.8
ENSG00000273369	16.5708861720689	0.550878380235421	0.142973401518167	3.85301303869044	0.000116673174912142	0.00355552496715842	RP11-700J17.1
ENSG00000259366	43.7712436926807	0.441507414995495	0.114717548517986	3.84864757571308	0.000118771736452502	0.00359560459405558	CTD-2647L4.4
ENSG00000147044	499.256346759685	0.203234618963811	0.0528449505445982	3.84586638589609	0.000120127214322987	0.0036298922814072	CASK
ENSG00000122008	634.441666083445	0.229308707178207	0.0596350188244721	3.84520222678469	0.000120453058367393	0.00363214759421506	POLK
ENSG00000116396	149.590483225885	0.27851123150972	0.0724383062738408	3.84480595745647	0.000120647869372527	0.00363214759421506	KCNC4
ENSG00000113070	72.5162131486046	0.780104670325674	0.203032789392995	3.84225953186156	0.000121906829791555	0.00366327774320121	HBEGF
ENSG00000166189	560.201616600374	-0.254429098703776	0.0662627127211997	-3.83970242471488	0.000123183527506836	0.00369482525322992	HPS6
ENSG00000091947	403.394859274236	-0.180830246273654	0.0471021912962603	-3.83910474857272	0.000123483743808157	0.00369702157243281	TMEM101
ENSG00000173295	151.680985246248	-0.319447609060884	0.0832676900695044	-3.83639330926844	0.000124854399084956	0.00373119926219575	FAM86B3P
ENSG00000143412	596.169152672049	-0.222547756965105	0.0580339087470201	-3.83478834650324	0.000125672464853136	0.00374476720695765	ANXA9
ENSG00000138080	44.6127789864433	0.393373259753343	0.102585185448567	3.83460104919895	0.000125768260711355	0.00374476720695765	EMILIN1
ENSG00000145623	12.9377254392402	0.677123697617058	0.17673874989505	3.83121244220152	0.000127513344093363	0.00378979896943174	OSMR
ENSG00000231731	54.6470048582013	0.389767570283249	0.101776788072917	3.82963127116965	0.000128335409992735	0.00380728382978447	AC010976.2
ENSG00000103502	1298.34858238994	-0.171166655018081	0.0447051527987909	-3.82879029154577	0.000128774675555243	0.00381336934685136	CDIPT
ENSG00000235245	52.9214175269033	0.390738159025949	0.102306863315848	3.81927611073011	0.000133843879279918	0.00394933618361384	RP11-122K13.12
ENSG00000218226	69.2997038370377	0.551139928392516	0.144305319765248	3.81926272218582	0.00013385114344906	0.00394933618361384	TATDN2P2
ENSG00000145569	1279.23571670293	0.151111467397264	0.0396206409281005	3.81395817577727	0.000136758622610282	0.00402055539071058	FAM105A
ENSG00000260588	17.3482228108107	0.512262915122472	0.134298769198328	3.81435301440462	0.000136540174237678	0.00402055539071058	RP11-930P14.2
ENSG00000196812	261.078043965784	-0.197401421964853	0.0517971590206357	-3.81104727937317	0.000138379295225256	0.00405198087173147	ZSCAN16
ENSG00000203879	4523.37993556474	-0.183768118946757	0.0482212959678222	-3.81093281004693	0.000138443395475459	0.00405198087173147	GDI1
ENSG00000100564	226.884960278756	0.230336609742254	0.0604446995772805	3.81069988523577	0.000138573914505706	0.00405198087173147	PIGH
ENSG00000228352	11.6335144529656	0.655845051832177	0.17217443357057	3.80918954243787	0.00013942304915584	0.0040695039455218	RP11-537H15.3
ENSG00000126883	2984.52236863415	-0.193985576415511	0.0509421191238156	-3.80796048048228	0.000140117658426576	0.00408246208013173	NUP214
ENSG00000145246	574.711873244286	0.188455650394014	0.049505157954663	3.80678818491201	0.000140783222010201	0.00409452917300025	ATP10D
ENSG00000119048	2962.36585017354	-0.190546915639015	0.0500761092445461	-3.8051461767623	0.000141720469712224	0.00411444080250087	UBE2B
ENSG00000182827	992.292191118792	0.154604891578973	0.0406359980361912	3.80462887711725	0.000142016956252224	0.00411571203999996	ACBD3
ENSG00000102908	1384.0548609152	0.342458074755535	0.0900341255966027	3.80364747795648	0.00014258104415683	0.00412472018860086	NFAT5
ENSG00000221823	1417.1122553531	-0.149408197790565	0.0392864771897772	-3.80304390920149	0.000142929010186605	0.00412745529948445	PPP3R1
ENSG00000270062	79.3388233711868	0.355230439344293	0.0934202582094473	3.80249900988145	0.000143243839222989	0.00412922550340675	RP11-248J18.3
ENSG00000182872	1685.05688589838	-0.153873980025436	0.040486562462561	-3.80061854270112	0.00014433534871108	0.00414601379974842	RBM10
ENSG00000131779	509.780577292054	-0.135002421758578	0.035517516204424	-3.8010096477907	0.000144107690276007	0.00414601379974842	PEX11B
ENSG00000123358	142.514200295124	0.703538761100505	0.185257592379503	3.79762444315532	0.000146089439088151	0.00418901178596604	NR4A1
ENSG00000100902	59.5020210363146	0.405815802657136	0.106885803146714	3.79672314479504	0.000146621382074976	0.0041968760102902	PSMA6
ENSG00000187837	693.809723057196	-0.38293365485305	0.100880206954157	-3.79592455660868	0.000147094229276254	0.00420302405653043	HIST1H1C
ENSG00000171604	772.804134457701	0.24118227178163	0.0635505367698644	3.79512564394261	0.000147568705033318	0.00420919702080148	CXXC5
ENSG00000161298	190.107973468384	0.220572893789182	0.0581369037915643	3.79402547098126	0.000148224458860742	0.00422051007249109	ZNF382
ENSG00000171467	1318.7857834703	0.184087168395289	0.0485625008532731	3.79072669571713	0.000150207165860709	0.00426950106522403	ZNF318
ENSG00000174010	403.446907740732	0.257304227224642	0.0678978087799725	3.78958072208861	0.000150901769913058	0.00427472248014606	KLHL15
ENSG00000236991	10.293463547155	0.833198482899269	0.219866950305611	3.78955764720954	0.000150915787197396	0.00427472248014606	EDRF1-AS1
ENSG00000213066	385.627716703342	-0.209357239403204	0.0552847705956765	-3.78688809137569	0.000152545760671522	0.00430674284872756	FGFR1OP
ENSG00000177119	1932.13020929243	0.220400636674908	0.0582064183627582	3.78653493677126	0.000152762626288302	0.00430674284872756	ANO6
ENSG00000121454	46.3870809002809	0.615190738574385	0.16247336328198	3.7864098221854	0.000152839526405386	0.00430674284872756	LHX4
ENSG00000236682	56.7401463280064	-0.39486729382245	0.104303780167346	-3.78574288668082	0.000153250065203672	0.00431085287041833	AC068282.3
ENSG00000113369	6659.74610380039	-0.31409381038064	0.0830128233127889	-3.78367820592184	0.000154527590637099	0.00433182593581143	ARRDC3
ENSG00000246575	154.754921745492	0.341035058563847	0.0901275713566106	3.78391488232234	0.000154380639574608	0.00433182593581143	AC093162.5
ENSG00000268205	420.098917593809	-0.272732788694887	0.0721622196662613	-3.77944012748267	0.000157181381103247	0.00437860083391183	CTC-444N24.11
ENSG00000227372	430.554680207289	0.216911032069836	0.057384542288929	3.77995577585506	0.000156856216718088	0.00437860083391183	TP73-AS1
ENSG00000126861	71.7281508980679	0.381611526974545	0.100973616804271	3.77931918309185	0.000157257739614707	0.00437860083391183	OMG
ENSG00000225422	33.5732732208144	0.549608703847036	0.145426161158891	3.77929733871295	0.00015727153483382	0.00437860083391183	RBMS1P1
ENSG00000143452	65.4459408690747	0.38523360404619	0.10196123715331	3.77823587474666	0.000157943247285865	0.00438979806918922	HORMAD1
ENSG00000205189	299.720133451915	0.237886356428501	0.0629737624279175	3.77754714434913	0.000158380530887602	0.00439445265173147	ZBTB10
ENSG00000168894	802.056311296507	-0.166150801727056	0.0440176808250719	-3.77463779582906	0.000160240315369359	0.0044260599509847	RNF181
ENSG00000155868	320.310738086117	-0.157742471660912	0.0417905860172098	-3.77459343585064	0.00016026883064924	0.0044260599509847	MED7
ENSG00000203667	76.1186454528734	0.34383812386512	0.091095239109173	3.77449060156752	0.000160334952482408	0.0044260599509847	COX20
ENSG00000175538	1714.81715443072	-0.335092594441514	0.0888105264523333	-3.77311798305087	0.000161219999763114	0.0044285584469839	KCNE3
ENSG00000142046	606.045729431108	-0.321779060455508	0.0852823688807991	-3.77310181082406	0.000161230454761268	0.0044285584469839	TMEM91
ENSG00000258926	15.1245877886927	0.807968517114944	0.214140012983844	3.77308521586716	0.000161241183708568	0.0044285584469839	RP11-47I22.1
ENSG00000273306	15.5779404891644	0.571788955259527	0.151578486062372	3.7722302822331	0.00016179482385945	0.00443628332693412	RP11-527J8.1
ENSG00000060642	250.507791239788	-0.21727995869582	0.0576228418894084	-3.77072618377327	0.000162773196000076	0.00445560847605587	PIGV
ENSG00000008324	410.739932023204	-0.193558703346965	0.0513461292542266	-3.76968441746817	0.000163454094630663	0.00446673966317048	SS18L2
ENSG00000130758	344.444692071565	0.226172441755907	0.0600147120161862	3.76861663011741	0.000164154781158275	0.00447837340154912	MAP3K10
ENSG00000252498	18.177626572234	0.746896910628442	0.198220854835244	3.7680036807895	0.000164558276801096	0.00448187400377835	RNU6-1016P
ENSG00000186222	430.927023986946	-0.16935335783995	0.0449701265173512	-3.76590796947408	0.000165944913635375	0.00450457468063226	BLOC1S4
ENSG00000026508	12376.5967318289	0.157855341468642	0.041915631292289	3.76602562342135	0.000165866777030183	0.00450457468063226	CD44
ENSG00000012174	152.936554951995	0.244690256287093	0.0650423302497577	3.76201552661937	0.000168549581485231	0.00456766561339427	MBTPS2
ENSG00000142961	760.172431252912	-0.172647518399872	0.0459072015139136	-3.76079379065496	0.000169375016294498	0.00458241011692441	MOB3C
ENSG00000152684	433.876273571142	-0.304833590222938	0.081074202451086	-3.75993325875579	0.00016995869349917	0.00459057585575619	PELO
ENSG00000184209	666.651982010463	-0.194419745581022	0.0517172202110251	-3.75928452433674	0.000170399963998809	0.00459487452590829	SNRNP35
ENSG00000268903	795.627620851773	-0.488669972752567	0.130093575432923	-3.75629596716348	0.000172446739777017	0.0046423802491707	RP11-34P13.15
ENSG00000213694	329.898670390977	0.373557254839356	0.0994798593764115	3.75510437168887	0.000173269258498003	0.00465682576428545	S1PR3
ENSG00000198742	598.138813563426	-0.153031506826924	0.0408153996047779	-3.7493570639698	0.000177288510313894	0.00474917428862236	SMURF1
ENSG00000120910	708.347449249606	0.180853210565635	0.0482356535268968	3.74936789163204	0.000177280856465266	0.00474917428862236	PPP3CC
ENSG00000219481	147.178246252575	0.298421669261071	0.0796157855091921	3.7482726239838	0.000178056654293903	0.00476191909439212	NBPF1
ENSG00000174173	434.006559591372	-0.183702926877042	0.049038964050424	-3.74606051400578	0.000179633276538397	0.00478835871518965	TRMT10C
ENSG00000135924	1169.25917985857	-0.16073870028107	0.0429081816492921	-3.74610841342241	0.000179598998912047	0.00478835871518965	DNAJB2
ENSG00000114784	1121.63316316068	-0.170512872981338	0.0455267394587936	-3.74533461012885	0.000180153499090238	0.00479437914980833	EIF1B
ENSG00000072849	1116.86356492735	-0.134963785937605	0.0360641511611009	-3.74232531731341	0.000182325269181299	0.00484426045539284	DERL2
ENSG00000259250	83.4129821149165	-0.304100742684421	0.0813336526555039	-3.73892887821561	0.000184805997484057	0.00489420370898023	RP11-50C13.1
ENSG00000046653	76.0062022682654	0.324519656328201	0.0867874098274904	3.73924808878681	0.000184571504980278	0.00489420370898023	GPM6B
ENSG00000150627	36.0284518306338	0.48586078862855	0.130038627204398	3.73628051198097	0.000186762319568437	0.00493798360196612	WDR17
ENSG00000198208	23.3714485922827	0.510956805667335	0.136785107671527	3.73547101994711	0.000187364156988799	0.00494586713918407	RPS6KL1
ENSG00000272072	28.0171784756568	0.554815356052015	0.148554833360862	3.7347512935125	0.000187900786384121	0.00495200664698733	CTA-363E19.2
ENSG00000270069	23.2131227670139	0.570654376578648	0.152822981892569	3.73408743574841	0.000188397040479401	0.00495706397138612	MIR222HG
ENSG00000159692	2397.65512585665	-0.136452393898364	0.0365651746684925	-3.73175829557687	0.000190147904625712	0.00499506277844996	CTBP1
ENSG00000110944	135.778314968822	-0.291867781757558	0.0782997594476054	-3.72756932864988	0.000193335387178056	0.00506865527705624	IL23A
ENSG00000264176	34.842191466102	0.473180077712887	0.126951143354064	3.72726125351386	0.000193571780090194	0.00506865527705624	MAGOH2P
ENSG00000196230	2830.164322001	-0.145712441863745	0.0391112045275668	-3.72559330820512	0.0001948563549243	0.00509410185016384	TUBB
ENSG00000171311	561.004221358627	-0.169271812114423	0.0454430807965797	-3.72491937490213	0.000195377656082702	0.00509954468688937	EXOSC1
ENSG00000165195	352.616420836199	0.206710427124703	0.0555184615648077	3.72327368767965	0.000196656141299494	0.00512470171735176	PIGA
ENSG00000167985	193.753802274913	-0.242464230529594	0.0651373460261701	-3.72235353943004	0.000197374399113693	0.00513520261719605	SDHAF2
ENSG00000136280	3571.67561949218	-0.160346558785089	0.0430958359661072	-3.72069725973511	0.000198673488679122	0.00515253998426251	CCM2
ENSG00000230202	126.642952316054	1.02182281395673	0.274610232145968	3.72099322727924	0.000198440760976881	0.00515253998426251	RP11-632C17__A.1
ENSG00000038382	965.23785929177	0.242334448282595	0.0651445422676136	3.71995012701272	0.000199262121665594	0.0051595901042409	TRIO
ENSG00000158050	504.253837811323	0.620851227262055	0.166990100841278	3.71789240280876	0.000200891794238955	0.00519353119487279	DUSP2
ENSG00000113448	824.03961929757	0.325833093968007	0.0876610307593203	3.71696626363664	0.000201629355003884	0.00520433804270723	PDE4D
ENSG00000085491	791.989365978486	0.225045278816952	0.0606058827709043	3.71325799621867	0.000204608114557938	0.00527286766108408	SLC25A24
ENSG00000229036	51.2012551722931	0.348037297924077	0.0937548999779501	3.71220382087689	0.000205462423760667	0.00528651895069508	VDAC1P8
ENSG00000006712	1745.8764308324	-0.127989841397085	0.0344947966399527	-3.71041008686057	0.000206923780789191	0.00531572179450087	PAF1
ENSG00000188997	331.976178740432	-0.236369830824323	0.0637282537165998	-3.70902726874428	0.000208057022321842	0.0053362127901296	KCTD21
ENSG00000172530	1057.89800058532	-0.20107776910361	0.0542245751300165	-3.70824056475275	0.00020870433765043	0.0053362127901296	BANP
ENSG00000260966	79.9482795680286	0.313196985261159	0.0844552479718917	3.70843722305329	0.000208542346293982	0.0053362127901296	RP11-690D19.3
ENSG00000162194	45.032731288094	0.390531476910301	0.105371873259625	3.70622126027952	0.000210374529841106	0.00537048584251112	LBHD1
ENSG00000124688	383.299803973535	-0.176251605155355	0.0475692741408378	-3.7051564973123	0.000211260255251433	0.00538465692845083	MAD2L1BP
ENSG00000234327	38.0826583370632	-0.433858737747222	0.117129790561909	-3.70408531993325	0.000212154849420566	0.00539058663418528	AC012146.7
ENSG00000135775	721.687645862581	0.128075118300176	0.0345751716275483	3.70425112215872	0.000212016147315935	0.00539058663418528	COG2
ENSG00000213937	134.442589093898	-0.429419327192009	0.115989292958984	-3.70223247540496	0.000213710657187911	0.00542165961622976	CLDN9
ENSG00000187134	45.9650061940688	-0.505296629229805	0.136593539713431	-3.69927179784565	0.000216218952896924	0.00547676218636424	AKR1C1
ENSG00000100441	1886.24556398868	0.151996941501447	0.0411115845681837	3.6971803227229	0.000218007489701087	0.00551349065956771	KHNYN
ENSG00000132965	5769.60187380042	-0.270727926043668	0.0732561448074385	-3.69563436289617	0.000219338444435243	0.00552997715869474	ALOX5AP
ENSG00000182621	303.017398142886	0.290106014348943	0.0784961369252251	3.69579989172328	0.00021919557277309	0.00552997715869474	PLCB1
ENSG00000104427	77.9122238759474	0.392652017538271	0.106382701969973	3.69093856677092	0.000223428099994897	0.00562437938889783	ZC2HC1A
ENSG00000244462	1890.7657583268	0.110014166187978	0.0298280357966863	3.68828061417975	0.000225774575220059	0.0056746767077301	RBM12
ENSG00000140932	2795.77353593939	-0.325409885478259	0.0882887663889604	-3.68574507026919	0.000228034527335043	0.0057226476836762	CMTM2
ENSG00000175505	141.580462752412	-0.325404134251617	0.088394372785256	-3.68127657902103	0.000232069095236706	0.00581493746787727	CLCF1
ENSG00000178803	12.3801207783372	0.760632532716732	0.206853796240182	3.67715046347782	0.000235853933556181	0.00590069587685027	ADORA2A-AS1
ENSG00000146457	3117.03725957241	-0.119460768027706	0.032545675252273	-3.67055736597024	0.000242022142661981	0.00603646958274989	WTAP
ENSG00000173258	44.8963596439954	0.526777908186726	0.143505220698024	3.67079264172009	0.000241799449539118	0.00603646958274989	ZNF483
ENSG00000134769	13.9673289819413	0.601586479076181	0.164040174913963	3.66731186059576	0.000245113777035476	0.00610423254828257	DTNA
ENSG00000241764	82.1378820364847	-0.432021020379086	0.117856574604757	-3.66565057425017	0.000246710598881533	0.00612381012377283	AC002467.7
ENSG00000138709	292.288665318	0.171442793250347	0.0467711507587981	3.66556713848007	0.000246791053791399	0.00612381012377283	LARP1B
ENSG00000273151	90.0364991609724	0.297142663396072	0.0810686454667199	3.6653216750495	0.00024702789042296	0.00612381012377283	RP11-449P15.2
ENSG00000009790	5152.23339661438	0.134142408070655	0.036620650729866	3.6630263361556	0.000249252900804154	0.00616021547101254	TRAF3IP3
ENSG00000162804	154.384816614682	0.304176489864012	0.0830309019918314	3.66341304944438	0.000248876724357078	0.00616021547101254	SNED1
ENSG00000138018	418.522590889318	0.188352151533287	0.0514346338810145	3.66197126957311	0.000250281933919017	0.00617627554202884	EPT1
ENSG00000179085	270.899813981481	-0.268819101503405	0.0734606705437959	-3.65936084592557	0.000252845096756351	0.00623008788331419	DPM3
ENSG00000132522	24.0782182577458	0.491125482161324	0.134279312198615	3.65749179169828	0.000254695413257123	0.00626619969141807	GPS2
ENSG00000138107	2199.98501828981	-0.125131082176572	0.0342355022234673	-3.65500939229099	0.000257172562751486	0.00631760110035212	ACTR1A
ENSG00000111276	5268.11792895888	-0.157601571399104	0.0431509908650924	-3.65232798226652	0.000259873673218279	0.00636475566271595	CDKN1B
ENSG00000236337	18.6947695242215	0.52405189353668	0.143476100992025	3.65253787852659	0.000259661278971454	0.00636475566271595	FMR1-IT1
ENSG00000135218	4806.70236231333	0.270323912069744	0.0740309736664576	3.65149745683034	0.000260715681273881	0.00637579024160316	CD36
ENSG00000158161	891.634743005648	-0.20553525291898	0.0562949132151792	-3.65104484899641	0.000261175622888794	0.00637746232382276	EYA3
ENSG00000120616	2012.68157417985	0.133821171994591	0.0366580808182252	3.65052313180727	0.000261706737507126	0.00638086472122539	EPC1
ENSG00000270426	23.7796433166134	-0.637902931660004	0.174844684916834	-3.64839761622393	0.000263881023072422	0.00641838775308272	RP11-326I11.5
ENSG00000141385	548.274612956276	0.153235904473714	0.0420025915406139	3.64824880687528	0.000264033879447745	0.00641838775308272	AFG3L2
ENSG00000259494	87.6372115127659	-0.313256096793721	0.0858930101421152	-3.6470499319493	0.000265268390839409	0.0064387873049202	MRPL46
ENSG00000088986	1417.45831574069	-0.184800662057162	0.0507519781775495	-3.64125042398663	0.000271317064121	0.00656603421001297	DYNLL1
ENSG00000198482	469.084951014228	0.172409332843569	0.047346638903839	3.64142707560999	0.000271130929615472	0.00656603421001297	ZNF808
ENSG00000261997	56.6415927302375	0.44080995702819	0.121165169065688	3.63809137912572	0.00027466597976737	0.00663721782265749	RP11-212I21.4
ENSG00000204282	616.88105890825	-0.22952694062254	0.0631259607671788	-3.63601500607779	0.000276888208897503	0.0066810048271313	TNRC6C-AS1
ENSG00000139625	329.9932442157	0.19385712136696	0.0533298258231115	3.63506008832582	0.000277915851759503	0.00668321679733811	MAP3K12
ENSG00000167604	447.6863596643	0.262388912931708	0.0721882594454914	3.63478652826968	0.000278210903702047	0.00668321679733811	NFKBID
ENSG00000165997	678.09001056995	0.269768714372763	0.074204243824119	3.63548902960558	0.000277453801582687	0.00668321679733811	ARL5B
ENSG00000152804	1388.12691059363	-0.232758616356862	0.0640527353213569	-3.63385911919447	0.000279213359361124	0.00669741971121448	HHEX
ENSG00000176095	2144.76432306514	-0.165589698350912	0.0455921898818978	-3.63197509880216	0.000281260267377833	0.00673253116121682	IP6K1
ENSG00000136877	608.245223656013	0.162210281650467	0.0446644742948129	3.63175172688208	0.000281503881671803	0.00673253116121682	FPGS
ENSG00000018699	342.765092915182	0.165376551337504	0.0455562221300304	3.63016386357658	0.000283241346803911	0.00676415222198723	TTC27
ENSG00000267074	181.88868906043	0.263898948410561	0.0727324579304316	3.62835185169983	0.00028523635279816	0.00679187789184741	RP11-1094M14.5
ENSG00000152455	96.8115869393287	0.274493742717163	0.0756509287371732	3.62842528570681	0.000285155247420737	0.00679187789184741	SUV39H2
ENSG00000167987	833.301141656155	-0.250885805080493	0.0692056116609578	-3.62522343288571	0.000288711727451176	0.00685458878279491	VPS37C
ENSG00000179240	65.0429995069227	0.363411050421118	0.100237836593845	3.62548776759446	0.000288416549474886	0.00685458878279491	RP11-111M22.2
ENSG00000165494	4312.70161466504	0.128956528508975	0.0355809412972233	3.62431469790931	0.000289728656320409	0.00686871997887991	PCF11
ENSG00000260267	53.8794628168942	0.315635654920494	0.0871016506795737	3.62376203502322	0.000290348759105272	0.00687341604585402	RP11-452L6.5
ENSG00000140545	235.377296526878	0.238333767206972	0.0657984935244202	3.6221766554354	0.000292134503978727	0.00690565263614156	MFGE8
ENSG00000239382	32.6072397613257	0.420039504426046	0.115977987117275	3.62171749024503	0.000292653618112937	0.00690789779450059	ALKBH6
ENSG00000276390	11.7268998143578	-0.671324842471991	0.185384031148271	-3.62126574934095	0.000293165181779336	0.00690995848862526	RP1-197B17.5
ENSG00000164967	235.319556168062	-0.237093367466331	0.0655086497876252	-3.61926811550799	0.00029543741468052	0.00694341871991577	RPP25L
ENSG00000102078	243.34360474898	-0.194208230326106	0.0536593472752789	-3.61928052031259	0.000295423253924222	0.00694341871991577	SLC25A14
ENSG00000198887	1769.74190259219	0.176725613863987	0.0488453578893304	3.61806365027352	0.000296815408863252	0.00696575297428788	SMC5
ENSG00000007202	2255.04664669362	0.101153550971885	0.0279672554495709	3.61685654690999	0.000298202459228216	0.00698823518482009	KIAA0100
ENSG00000240053	65.9698699007119	0.425373385862942	0.11762551409667	3.61633604009885	0.000298802431032555	0.00699223447446439	LY6G5B
ENSG00000180573	4292.58125203423	-0.233263938224302	0.064519248898068	-3.61541620846871	0.000299865457122263	0.00700704261140646	HIST1H2AC
ENSG00000171456	1828.2266582932	0.130848776723492	0.0362420062013052	3.61041759103225	0.000305704422232391	0.00712304424162941	ASXL1
ENSG00000103064	432.261250895274	0.236607078341073	0.0655326869503923	3.61052002217126	0.000305583709671694	0.00712304424162941	SLC7A6
ENSG00000168488	2324.52564446477	0.174263631071412	0.0483008105807589	3.60788212404931	0.000308706677117624	0.00718272235744963	ATXN2L
ENSG00000100147	78.7347966779517	0.346218904614885	0.0959723199475827	3.60748708381729	0.000309176923848686	0.00718340165295799	CCDC134
ENSG00000116560	7367.54701552684	0.0995382140513758	0.0276068914694368	3.60555675605757	0.000311484402471657	0.00721947571174657	SFPQ
ENSG00000103035	511.951202507424	0.131841424765224	0.0365672897694909	3.60544698817747	0.000311616100285985	0.00721947571174657	PSMD7
ENSG00000278897	40.4676319850191	0.613910683181473	0.170310440053553	3.6046567843312	0.000312565714329999	0.00723119004160893	AC020951.1
ENSG00000115825	1173.28780135785	0.176681571475915	0.0490457516801553	3.60238278389775	0.0003153135942534	0.00728441490724131	PRKD3
ENSG00000164296	53.6172460125502	-0.306771463251901	0.0851817487586108	-3.6013755026471	0.000316537996326775	0.00730234326653568	TIGD6
ENSG00000078401	41.0212308397638	-0.503850488948454	0.14000173439795	-3.59888747889562	0.000319581417769781	0.00734135761807676	EDN1
ENSG00000125834	1094.2496281916	-0.178785601651331	0.049669087087222	-3.59953468315962	0.000318787114066312	0.00734135761807676	STK35
ENSG00000234511	53.8182660281234	0.388700448989526	0.108000449204563	3.59906326179524	0.000319365499103394	0.00734135761807676	C5orf58
ENSG00000238142	71.1871545386877	-0.513467332591564	0.142773424697052	-3.59637890371462	0.000322677692544326	0.00740204447671752	RP11-108M9.4
ENSG00000115998	313.125359087629	-0.208951873038862	0.0581361557160662	-3.59418111612627	0.000325413422691358	0.00744037283458712	C2orf42
ENSG00000167193	1646.28618920534	-0.164379298665821	0.0457525902946352	-3.59278671671396	0.00032716036211571	0.00744037283458712	CRK
ENSG00000213246	1293.06191916304	-0.14969398867879	0.0416533256934518	-3.59380640529078	0.000325882010281653	0.00744037283458712	SUPT4H1
ENSG00000172869	1436.78325226518	0.220343607080998	0.0613111329338744	3.59385965545025	0.000325815380822993	0.00744037283458712	DMXL1
ENSG00000151623	341.163247525889	0.271677276140346	0.0756105333654109	3.59311413434135	0.000326749378190052	0.00744037283458712	NR3C2
ENSG00000160229	135.940988770234	0.378202212828875	0.105276092957267	3.59247956686986	0.000327546345084973	0.00744037283458712	ZNF66
ENSG00000166402	28.2455126514481	0.513384269545068	0.142876640140798	3.59319948340857	0.000326642325031108	0.00744037283458712	TUB
ENSG00000236772	10.3911576141641	0.829325470904033	0.230979811457004	3.59046734722271	0.000330085581856597	0.00748760984916211	RP5-1184F4.5
ENSG00000198563	2997.53324744213	0.232204624610869	0.06469140474533	3.58942004003447	0.000331414465063307	0.00749687137845289	DDX39B
ENSG00000244560	29.7642299633623	0.471402808992404	0.131328791335458	3.58948562762816	0.000331331097053293	0.00749687137845289	RP4-800G7.2
ENSG00000123700	2740.51910330604	-0.446314046160019	0.12448240091415	-3.58535859593374	0.000336615354336308	0.00757631347843865	KCNJ2
ENSG00000260711	160.583881759612	-0.336384320254331	0.0937993559043113	-3.5862114085036	0.000335516990381941	0.00757631347843865	RP11-747H7.3
ENSG00000125347	7992.04052639259	-0.241973110088045	0.067491740649133	-3.585225507014	0.000336787066887062	0.00757631347843865	IRF1
ENSG00000172586	340.913958861561	-0.17955292823149	0.0500776146048396	-3.58549283244291	0.000336442244134356	0.00757631347843865	CHCHD1
ENSG00000148842	235.796838347992	0.249240670729264	0.0695377776499515	3.58424843520201	0.000338050205636802	0.00759423958511253	CNNM2
ENSG00000112419	809.63422434381	0.2126218280708	0.0593805752105531	3.58066299150657	0.000342723470898423	0.00768861869217992	PHACTR2
ENSG00000102910	1532.42639108568	0.142040463275053	0.0397030598775734	3.57756968135561	0.000346803783174898	0.00776945421811494	LONP2
ENSG00000270681	13.0362963002929	0.69551091647541	0.19446922194188	3.57645754701109	0.000348281846014285	0.00778502975483768	RP11-372K14.2
ENSG00000242472	12.2425908859204	0.748633995838252	0.209330377694753	3.57632754539771	0.000348455006525245	0.00778502975483768	IGHJ5
ENSG00000180953	283.279127779741	-0.357276291521265	0.0999309156627816	-3.57523284112496	0.000349916336226957	0.00780696899743623	ST20
ENSG00000153064	1562.0351480793	0.319878954379735	0.089493840641167	3.57431251232492	0.000351149323886283	0.00782376065408468	BANK1
ENSG00000173110	5211.57412322075	-0.307612464276446	0.0861649210879622	-3.57004289439802	0.000356922777405933	0.00793069751106471	HSPA6
ENSG00000165879	2625.64487472295	-0.262698255087833	0.0735784787116183	-3.57031376141176	0.000356553884899193	0.00793069751106471	FRAT1
ENSG00000273576	119.747110554798	-0.282144366770257	0.0790510050342988	-3.56914332269197	0.000358150462465738	0.00793632188051629	RP11-390P24.1
ENSG00000271614	282.892255132744	0.354627190766227	0.0993562243015431	3.56924987094864	0.000358004845484945	0.00793632188051629	LINC00936
ENSG00000124574	488.572306807326	0.187238190771966	0.0524672968772477	3.56866470956236	0.000358805255173378	0.00794002879213153	ABCC10
ENSG00000139624	817.155224581458	-0.135088599113976	0.0378764036161751	-3.56656351228358	0.000361693179957987	0.00799307574216518	CERS5
ENSG00000099985	598.625045648703	0.565110549847402	0.158466726706306	3.56611486583393	0.000362312617316167	0.00799591544475394	OSM
ENSG00000231074	496.877171189342	0.176789540925928	0.0495800925344391	3.56573640525434	0.000362835921597928	0.0079966287619289	HCG18
ENSG00000182796	145.725923199575	0.246832705775646	0.0692529922646712	3.56421719414376	0.000364943683037295	0.00803221319679517	TMEM198B
ENSG00000186577	427.535029664347	-0.208353642157821	0.0584894527332041	-3.5622429758099	0.000367699831019532	0.00807106084611201	C6orf1
ENSG00000155508	3083.97496548999	-0.0905804468409646	0.025426798082578	-3.56240083972778	0.000367478728024492	0.00807106084611201	CNOT8
ENSG00000008323	29.6583352440808	0.557462633470755	0.156617028730898	3.55939988127726	0.00037170320027367	0.00814795427033278	PLEKHG6
ENSG00000174915	204.664540234326	0.186661219580889	0.052500611878455	3.5554103638455	0.000377389594433229	0.00825222488190891	PTDSS2
ENSG00000205056	144.112439742906	0.463860835372198	0.130468326989777	3.55535206187281	0.000377473293855353	0.00825222488190891	RP11-693J15.5
ENSG00000142185	463.474954859919	0.280887588185869	0.0790195898023476	3.55465763475178	0.000378471561722031	0.00826295754124225	TRPM2
ENSG00000005075	993.796520384843	-0.188874386397572	0.0532177941275345	-3.54908333751942	0.000386574714700196	0.00842857078757978	POLR2J
ENSG00000174428	233.809034775767	0.204869125522376	0.057738271431212	3.54823794415896	0.000387817698594135	0.00844436745588593	GTF2IRD2B
ENSG00000088356	242.282970550836	-0.16630932414276	0.0468837380538668	-3.54727099515146	0.000389243984749258	0.00846410784994814	PDRG1
ENSG00000188283	460.550291658424	-0.138933180748712	0.0391805814715789	-3.54597036415838	0.000391170196298076	0.00849465198280902	ZNF383
ENSG00000213190	522.582848127044	0.257820174283359	0.0727314399621357	3.5448242798105	0.000392874905758464	0.00850898083788311	MLLT11
ENSG00000151208	132.851905280419	0.368317113774283	0.103895843734349	3.54506109711214	0.000392522090848236	0.00850898083788311	DLG5
ENSG00000107185	696.499583946257	0.137316371317366	0.0387523351157907	3.54343476095232	0.00039495101455305	0.00854258588848011	RGP1
ENSG00000064419	1731.03761340995	-0.114865147716326	0.0324226617698495	-3.54274268200711	0.000395988884064749	0.00854594886343301	TNPO3
ENSG00000103966	657.032292212698	0.187295403047389	0.0528690057622859	3.54263145952702	0.000396155915263211	0.00854594886343301	EHD4
ENSG00000132664	266.036487155532	-0.181725464511093	0.0513031402133279	-3.54218988848335	0.000396819705539042	0.00854894516417246	POLR3F
ENSG00000180787	323.915951008391	0.17678318163709	0.0499189712797008	3.54140273938252	0.000398005562949223	0.00856316592305679	ZFP3
ENSG00000175906	35.3269504315353	-0.378297337550208	0.106914501565176	-3.53831643053205	0.000402687169785908	0.00865246165475341	ARL4D
ENSG00000142599	6141.16816728137	-0.219026221645617	0.0619143654492566	-3.53756709055066	0.000403831575826515	0.00865421694142954	RERE
ENSG00000105939	5475.35338117496	0.168925882287543	0.0477494712500666	3.53775398690529	0.000403545860169701	0.00865421694142954	ZC3HAV1
ENSG00000123384	3881.65659711735	0.30430659969395	0.0860692047290435	3.535603711594	0.000406844510479407	0.00870732791350604	LRP1
ENSG00000162413	2148.58146300402	-0.24928961703804	0.070536029443785	-3.53421675424354	0.000408985529860045	0.0087240976413182	KLHL21
ENSG00000164442	2063.16721235581	-0.18916013311328	0.0535249456924497	-3.53405558223599	0.000409235009391975	0.0087240976413182	CITED2
ENSG00000168906	2807.22446740171	0.152399200521352	0.0431215280088332	3.53417904138587	0.000409043893180898	0.0087240976413182	MAT2A
ENSG00000108187	142.176623369893	0.232190777518845	0.0657158480759574	3.53325391540968	0.000410478029644942	0.00873915773702899	PBLD
ENSG00000132950	505.095950195173	0.152767339309623	0.0432477096705823	3.53237987568016	0.00041183728529777	0.00875664995514984	ZMYM5
ENSG00000167110	1551.68089102184	-0.101850391514077	0.0288375406211525	-3.53186815935923	0.00041263502664991	0.00876217298441601	GOLGA2
ENSG00000205352	3562.09152892924	-0.184313779362226	0.0522089197739334	-3.53031206468764	0.000415069780493885	0.00879095125475149	PRR13
ENSG00000235859	248.229566362196	0.219388939727754	0.06214198154333	3.53044647562099	0.000414858945288001	0.00879095125475149	AC006978.6
ENSG00000176597	518.321259486491	0.43293539673427	0.122688053297474	3.52874941853189	0.000417528282200477	0.00880865690699375	B3GNT5
ENSG00000275560	94.9429499822258	0.478580805597454	0.13561872478801	3.52886967743975	0.000417338597636237	0.00880865690699375	RP11-180M15.7
ENSG00000187583	15.8184672982078	0.513249245082475	0.145427687017809	3.52924024033761	0.000416754614132391	0.00880865690699375	PLEKHN1
ENSG00000267249	16.7711659484376	-0.461380613089829	0.13078337799204	-3.52782303205161	0.000418992174322719	0.00881740254888201	RP11-973H7.3
ENSG00000053702	113.113800878497	0.273930795760992	0.0776491427948855	3.52780192930906	0.00041902557701447	0.00881740254888201	NRIP2
ENSG00000137275	1845.23576183668	-0.106619694403299	0.0302317491164467	-3.52674580596116	0.000420700452749729	0.00884122357927075	RIPK1
ENSG00000160588	3625.63271351717	-0.254884644568285	0.0722949519767112	-3.5256216042635	0.000422490159802949	0.00884407570346174	MPZL3
ENSG00000085185	589.346415773058	-0.236281287294542	0.0670080820068139	-3.52616102741928	0.00042163052330943	0.00884407570346174	BCORL1
ENSG00000153113	4527.74169773908	0.169079143124414	0.0479616731741189	3.52529701185764	0.000423008225762675	0.00884407570346174	CAST
ENSG00000185829	83.6357298741722	0.472483051015447	0.134003871068936	3.52589106006039	0.000422060544801569	0.00884407570346174	ARL17A
ENSG00000157999	9.47363313079147	0.640551946965526	0.181785989318916	3.52365960306092	0.000425630669278483	0.00888749578274186	ANKRD61
ENSG00000274828	82.61246167888	-0.306734065500342	0.0870788118627505	-3.52248795015488	0.000427516475915319	0.00891544282104072	RP11-567M16.6
ENSG00000173221	2772.3246875819	-0.185949754242799	0.052826169359863	-3.52003100917786	0.000431496348093793	0.00896543343098034	GLRX
ENSG00000133422	715.196405308684	-0.143147750703798	0.0406702604280962	-3.5197156152191	0.000432009736366976	0.00896543343098034	MORC2
ENSG00000140455	1774.08216500639	-0.112980415793773	0.0320938618475093	-3.52031227437158	0.000431038994077246	0.00896543343098034	USP3
ENSG00000264304	30.6670452539359	0.536226777018886	0.152352271772604	3.51965068049159	0.000432115505821795	0.00896543343098034	RP11-20B24.7
ENSG00000172780	169.32694368112	0.351557410621605	0.0999235381287738	3.51826423688625	0.00043437960270223	0.00898950519594819	RAB43
ENSG00000167680	62.0834942355789	0.764682298932206	0.217338001457333	3.51840126349153	0.00043415534263994	0.00898950519594819	SEMA6B
ENSG00000196544	318.63888389078	-0.214869703966956	0.0610818148916538	-3.51773607821066	0.000435245008272856	0.00899598407327412	BORCS6
ENSG00000186431	1259.10850168584	0.401309904826069	0.114225364668269	3.51331690637668	0.0004425493010052	0.00913056516828951	FCAR
ENSG00000161055	21.3672056744972	1.35246382737377	0.384975138241048	3.51311992133617	0.000442877539322694	0.00913056516828951	SCGB3A1
ENSG00000173218	108.422906591449	0.33528810076668	0.0954577219722055	3.5124251222369	0.000444037105811254	0.00914289803078116	VANGL1
ENSG00000153487	998.485259244303	-0.1490222314077	0.042451589673323	-3.51040402855271	0.000447426287448419	0.0092010504339298	ING1
ENSG00000123297	215.174467715173	-0.20046574888005	0.0571718497453775	-3.50637157574665	0.000454260586627415	0.00930659706735122	TSFM
ENSG00000135622	132.960065525089	0.212271825484689	0.0605314978799233	3.50679948323389	0.000453530765118709	0.00930659706735122	SEMA4F
ENSG00000272498	56.4772566778553	0.423846219732377	0.120879117077707	3.50636429169073	0.00045427301949679	0.00930659706735122	RP11-415F23.3
ENSG00000272155	59.0868146373907	-0.432018258889357	0.123251018375933	-3.50519017677923	0.00045628122625499	0.00932706942820558	RP11-707M3.3
ENSG00000105829	426.773121697951	-0.194325764312816	0.0554406942180412	-3.50511058805573	0.000456417654219921	0.00932706942820558	BET1
ENSG00000138604	319.405710330906	0.209394004762996	0.0597471604373308	3.50466872785746	0.000457175766725924	0.00933085427652271	GLCE
ENSG00000173065	374.939388905428	-0.204456634717211	0.0583972764391169	-3.5011330525041	0.000463284483938292	0.00944369760939043	FAM222B
ENSG00000214176	1399.72932493804	0.237934729199098	0.0680174589701882	3.49814198885883	0.000468511631809998	0.0095321616078507	PLEKHM1P1
ENSG00000137857	44.0519583538329	0.37459158377793	0.107087946542889	3.49798082670216	0.000468794833172985	0.0095321616078507	DUOX1
ENSG00000222020	33.3059044822042	-0.503269335046172	0.143926076724976	-3.49672100079441	0.000471014165739828	0.00954710753893857	AC062017.1
ENSG00000009335	1852.5291633858	0.105996631839059	0.0303093112984725	3.49716398354458	0.000470232684259482	0.00954710753893857	UBE3C
ENSG00000102119	713.327933736195	0.164451981568919	0.0470324299650143	3.49656570352093	0.000471288417836717	0.00954710753893857	EMD
ENSG00000114982	1332.63607802749	-0.132480509413189	0.0379012639903755	-3.49541137854481	0.000473331607907661	0.00956470458807951	KANSL3
ENSG00000136874	431.101451198728	0.225479931548191	0.0645055526251668	3.4955119733401	0.000473153223951049	0.00956470458807951	STX17
ENSG00000242259	576.812687210072	-0.14659044049639	0.0419438741671607	-3.49491894602241	0.000474205740196741	0.00957049428820857	C22orf39
ENSG00000273893	35.870686587334	-0.4125624353826	0.11807716511353	-3.49400694864181	0.00047582863343955	0.0095913625653836	RP1-101A2.1
ENSG00000150995	1315.51065923968	0.182508816157544	0.0522508213330964	3.49293679029578	0.000477739579108315	0.00961797839918062	ITPR1
ENSG00000181704	578.981449657587	-0.136632121200322	0.0391327275502835	-3.49150518641351	0.00048030714051227	0.0096577313549671	YIPF6
ENSG00000185304	74.0922818786595	-0.768938043422895	0.220405760797447	-3.48873840974396	0.000485305828098992	0.00971251392440659	RGPD2
ENSG00000112305	301.727889426482	0.191237763194928	0.0548099113213892	3.48910915169277	0.000484633211363147	0.00971251392440659	SMAP1
ENSG00000167633	95.101577332133	0.547631221532004	0.156973887710561	3.48867719032202	0.000485416978846133	0.00971251392440659	KIR3DL1
ENSG00000277778	16.3543469640623	0.554145407463996	0.158804306931176	3.48948601062915	0.000483950388051982	0.00971251392440659	PGM5P2
ENSG00000132801	127.468712122116	-0.301256315100949	0.0863952415310379	-3.48695494985937	0.000488553646170255	0.00976328004315944	ZSWIM3
ENSG00000162613	3076.51119748689	0.142719580711655	0.0409342690098599	3.48655501035764	0.000489284743900735	0.00976590762734224	FUBP1
ENSG00000204599	469.792130068311	-0.160559242933519	0.046060418089945	-3.48583989446178	0.000490594534357958	0.00977521979752467	TRIM39
ENSG00000137497	3302.18630649609	0.130085638963974	0.0373238901152807	3.48531834602941	0.00049155185203983	0.00977521979752467	NUMA1
ENSG00000181523	803.243549461029	0.188834564972693	0.0541790658365606	3.48537875389621	0.00049144088247065	0.00977521979752467	SGSH
ENSG00000089094	1092.81217541306	0.128999023927413	0.0370207428841369	3.48450662730185	0.000493045251919408	0.00978337277434636	KDM2B
ENSG00000101452	278.647604823846	0.144780350460126	0.0415505050406817	3.48444261551991	0.000493163200573363	0.00978337277434636	DHX35
ENSG00000237914	24.085853969515	0.775313582320626	0.222649439049222	3.48221664348871	0.00049728119913458	0.00985306434343663	SIRPG-AS1
ENSG00000103150	292.062250736742	-0.175722175733247	0.05050612528822	-3.47922503915049	0.000502866113476235	0.00993562573488118	MLYCD
ENSG00000145860	3389.45919653349	-0.127636417125018	0.036689666441054	-3.47881105242753	0.000503643559817582	0.00993562573488118	RNF145
ENSG00000232160	39.7032306300726	0.359152923075847	0.103228698112697	3.47919647968196	0.000502919710776607	0.00993562573488118	RAP2C-AS1
ENSG00000270871	25.4762667478881	0.434539947835926	0.124915149894751	3.47868091422102	0.000503888184258111	0.00993562573488118	AC015849.19
ENSG00000173214	175.433223292138	0.187539314809873	0.0539970092519991	3.47314263156029	0.00051440190589414	0.0101306696992719	MFSD4B
ENSG00000044574	8136.81613601933	0.161126636172757	0.0464144081277064	3.47147885047735	0.000517600102318599	0.010181344041622	HSPA5
ENSG00000130770	1208.83165860136	-0.143358193135421	0.0413297266592593	-3.46864605027104	0.00052308811723304	0.0102768831910429	ATPIF1
ENSG00000180776	3116.61571722212	0.169856797269975	0.0490291199140636	3.46440640924606	0.000531403014256831	0.0104276637267482	ZDHHC20
ENSG00000242028	31.9580413541835	0.403463573478118	0.116526175179262	3.46242870202712	0.000535323726529137	0.0104871026347576	HYPK
ENSG00000279155	21.5929175963783	0.49025749339296	0.141601668700373	3.46222963255001	0.000535719861983074	0.0104871026347576	LL0XNC01-36H8.1
ENSG00000075945	397.720132010286	-0.176620393532089	0.0510386407861066	-3.46052306275694	0.000539127050726094	0.0105217983790076	KIFAP3
ENSG00000100410	569.978310266792	-0.139255564308175	0.0402400887163578	-3.46061772601328	0.000538937526638556	0.0105217983790076	PHF5A
ENSG00000167377	26.5616989122825	0.411644130820989	0.118959514314066	3.46037164992289	0.000539430321512331	0.0105217983790076	ZNF23
ENSG00000104980	348.64745397598	0.137739733048846	0.0398175617336012	3.45927091092095	0.000541639817894353	0.0105430630923895	TIMM44
ENSG00000147202	523.111411976077	0.193652136274192	0.0559820326092154	3.45918372821486	0.000541815178260576	0.0105430630923895	DIAPH2
ENSG00000260911	39.467240713325	-0.463623579030255	0.134074794303716	-3.45794734527073	0.000544307754911348	0.0105789264967078	RP11-196G11.2
ENSG00000141741	438.304516922707	-0.199650054063962	0.0577439323154963	-3.45750706711714	0.000545197942303046	0.0105835981958161	MIEN1
ENSG00000261270	21.4460491136945	0.521510149471761	0.150930155270287	3.45530784446512	0.000549664838659618	0.0106576086038681	RP11-325K4.3
ENSG00000157514	21680.3922016508	-0.235207627501757	0.0680789242096938	-3.45492573850433	0.000550444411341544	0.0106600334453267	TSC22D3
ENSG00000123144	4645.38826487095	-0.143017205256531	0.0414210809630905	-3.45276371188794	0.000554874813639868	0.0107330713655018	C19orf43
ENSG00000162337	51.6881751574645	0.453833495823245	0.131564512482127	3.44951299754862	0.000561598694705363	0.010850246667457	LRP5
ENSG00000279159	216.285411549956	0.318222342647688	0.0923109447901079	3.44728724607083	0.000566246193010249	0.0109270755279122	RP3-394A18.1
ENSG00000173889	2291.69050330645	0.216368684937125	0.0627913914221215	3.44583357744957	0.000569300845983186	0.0109730211580215	PHC3
ENSG00000264608	29.8979217474658	-0.484174882959162	0.140539355292279	-3.44511956776965	0.000570806836739794	0.0109760695985608	RP11-192H23.8
ENSG00000118200	138.860451656526	0.290280036800603	0.0842545080620097	3.44527602709356	0.000570476515355997	0.0109760695985608	CAMSAP2
ENSG00000170260	381.679154441587	-0.194084929309315	0.0563489350735213	-3.44434067930622	0.000572453900175666	0.010994760226605	ZNF212
ENSG00000111537	42.8506939280612	-0.596279960284944	0.173178740752127	-3.44314756935673	0.000574985473747535	0.0110303750423158	IFNG
ENSG00000139613	2571.42932059038	0.13430772253086	0.0390203663455768	3.44199030171548	0.000577450952081206	0.0110425166868343	SMARCC2
ENSG00000272617	126.379594646185	0.20171698404617	0.058605494680778	3.4419466151581	0.000577544215778535	0.0110425166868343	COG8
ENSG00000222937	11.3784367632078	0.607532853143173	0.176511103247796	3.44189595988352	0.000577652374113268	0.0110425166868343	SNORD63
ENSG00000265749	21.9478483830034	0.523260975165315	0.152057283650837	3.44120954026022	0.000579119866861273	0.011057591174173	RP11-849F2.5
ENSG00000182117	2144.63278609516	-0.178604452904702	0.0519301123683847	-3.43932344374123	0.000583170033897869	0.0111218856464808	NOP10
ENSG00000177051	681.925787743559	-0.1444610951048	0.0420093290133434	-3.43878606246996	0.000584328814010991	0.0111248463314607	FBXO46
ENSG00000141956	365.535775393958	0.180056321084655	0.0523629883735555	3.43861812851743	0.000584691377155422	0.0111248463314607	PRDM15
ENSG00000168522	1505.54283690467	-0.112794808776372	0.0328120849936317	-3.43759955511098	0.000586894930507008	0.0111537429791921	FNTA
ENSG00000097096	38.2257283586951	0.527225270425971	0.153389714596536	3.43716181891818	0.000587844289913634	0.0111587645102836	SYDE2
ENSG00000131100	2656.42534111265	-0.12736472867571	0.0370627172327498	-3.43646494874818	0.000589358607458671	0.0111679493633134	ATP6V1E1
ENSG00000185624	3822.71111366563	0.145259831658611	0.0422720604886666	3.436308284465	0.000589699542730369	0.0111679493633134	P4HB
ENSG00000160294	1378.16508820129	0.165523387382134	0.0481841385919184	3.43522562028112	0.000592060676746499	0.011199642557689	MCM3AP
ENSG00000185477	1622.88886489078	0.241692626498913	0.0703890820722491	3.43366640654347	0.000595476563044487	0.0112511911627675	GPRIN3
ENSG00000171861	160.825234324789	-0.195062880163105	0.0568326331585858	-3.4322337242197	0.000598631410709532	0.0112846178081321	MRM3
ENSG00000108786	74.3996601733565	0.319914634061522	0.0932071171114811	3.43229834776335	0.000598488771610872	0.0112846178081321	HSD17B1
ENSG00000006327	144.822951019599	-0.278641480473817	0.0812123299931458	-3.43102433457252	0.0006013066571246	0.0113010823127489	TNFRSF12A
ENSG00000204642	6674.42827049508	-0.218903546228767	0.0637976543804967	-3.43121621561823	0.000600881462757732	0.0113010823127489	HLA-F
ENSG00000133030	3567.1309036139	0.14307989833713	0.0417033360867586	3.43089814300396	0.000601586441036	0.0113010823127489	MPRIP
ENSG00000154429	970.634270736538	-0.167830543802832	0.0489369348799371	-3.42952708858026	0.000604634075094238	0.0113452479044468	CCSAP
ENSG00000086712	806.929708858607	0.142177687231659	0.0414627495841474	3.42904628027896	0.000605706233499315	0.0113522870253203	TXLNG
ENSG00000181322	21.5330364975298	0.471697611687639	0.137591520146617	3.42824624064767	0.000607494170801163	0.0113727098388949	NME9
ENSG00000108424	8656.83342327263	-0.137562792303144	0.0401485446688886	-3.42634567299129	0.00061176129181406	0.0114394445003164	KPNB1
ENSG00000121864	604.686680812647	0.16888283467639	0.0493206885932051	3.424178361931	0.000616661331671182	0.0115178476019823	ZNF639
ENSG00000146826	1387.6184136542	-0.216210450808491	0.063149322946325	-3.42379681556148	0.000617527735293062	0.0115208181268249	C7orf43
ENSG00000138829	263.134023778351	0.40242045324884	0.117566974192973	3.42290388955927	0.000619559792939167	0.0115455038302062	FBN2
ENSG00000189164	163.098568295678	0.185048828600142	0.0540846808658173	3.42146474080606	0.000622848004775893	0.0115935148043257	ZNF527
ENSG00000166133	165.185467403019	-0.183634469658021	0.053711519334961	-3.4189029081978	0.000628741569435609	0.0116632277236877	RPUSD2
ENSG00000178951	3376.20372544897	-0.148144611770492	0.0433290303872706	-3.41906131862148	0.000628375642430144	0.0116632277236877	ZBTB7A
ENSG00000198711	16.202459983194	0.571834612253641	0.167248970356039	3.41906207874596	0.000628373887025486	0.0116632277236877	SSBP3-AS1
ENSG00000171824	1003.94967309065	0.106060733005558	0.0310267740964594	3.41836159556339	0.000629993494646823	0.0116731559127563	EXOSC10
ENSG00000240710	18.3484679529078	0.582091967949375	0.170410876768292	3.41581464157859	0.000635915169578057	0.0117694890533157	RP11-430C7.4
ENSG00000162909	5741.20097422638	0.119427264120197	0.0349701699661768	3.41511820605125	0.00063754337532389	0.0117862303676506	CAPN2
ENSG00000128829	895.848320155874	0.181020505932109	0.053016866862933	3.4143946378444	0.000639239121700994	0.0118041809241996	EIF2AK4
ENSG00000213462	811.8900625128	0.384967054132465	0.112762812191078	3.41395400356045	0.000640273841672092	0.0118098981419177	ERV3-1
ENSG00000171867	1825.03853235993	0.125266113052233	0.0367084049545293	3.41246407212191	0.000643784126030223	0.0118612127382967	PRNP
ENSG00000168140	37.1861082294736	-0.408435045043455	0.119739748426087	-3.41102307639785	0.000647196137831311	0.0118837468961201	VASN
ENSG00000178074	360.465224998094	0.192212479995817	0.0563499645811957	3.41104881652329	0.000647135042717772	0.0118837468961201	C2orf69
ENSG00000151835	1060.06195818864	0.224547082433734	0.0658266550643838	3.41118779640418	0.000646805261629522	0.0118837468961201	SACS
ENSG00000082293	90.8006770196674	0.454019910885761	0.133141737657874	3.41004946211853	0.00064951098913405	0.0119128214865161	COL19A1
ENSG00000188811	651.966421802032	0.149284307508602	0.043804763309411	3.40794690417903	0.000654536294624993	0.0119511576575754	NHLRC3
ENSG00000188277	48.7849438933412	0.296685666117494	0.0870340216380912	3.40884702939714	0.000652380503108699	0.0119511576575754	C15orf62
ENSG00000222009	85.3832300866403	0.367188494374903	0.107736098742786	3.40822155860261	0.000653877798549452	0.0119511576575754	BTBD19
ENSG00000232439	10.9674473410321	0.692621103866138	0.203227337215691	3.40810991943983	0.000654145384008629	0.0119511576575754	RPL18AP7
ENSG00000271913	155.407453683079	0.466629803005907	0.136952126047405	3.40724760157712	0.000656215688433614	0.0119684041629544	RP1-111C20.4
ENSG00000104219	992.813637041901	0.169926125553758	0.0498787255561993	3.40678563172789	0.000657327318266331	0.0119752684928453	ZDHHC2
ENSG00000134830	2516.72032527605	-0.239803091291346	0.0704168052990647	-3.40548098245705	0.000660476135409021	0.0120057754658557	C5AR2
ENSG00000187862	79.6347087252553	0.345155955812061	0.101349197523899	3.40561113698675	0.000660161374168158	0.0120057754658557	TTC24
ENSG00000100485	3785.42333824328	0.186055392524341	0.054644397535244	3.40483930496884	0.000662029987160867	0.0120072187092306	SOS2
ENSG00000101445	1407.83792659718	0.191779801264703	0.0563230327883527	3.40499777391891	0.000661645931503629	0.0120072187092306	PPP1R16B
ENSG00000269737	59.7421202934296	0.554133198757606	0.16289110986386	3.40186274880645	0.000669282410807023	0.0121252531977909	RP11-345P4.6
ENSG00000186026	92.132002700365	-0.327830428880206	0.096398560243609	-3.40078138150347	0.00067193542070903	0.0121597913300978	ZNF284
ENSG00000177576	238.164310501067	-0.234403319533514	0.0689505993902344	-3.39958349320329	0.000674885713778208	0.0121996266596067	C18orf32
ENSG00000236814	9.86800144655273	-0.522422049837168	0.153748635082345	-3.39789715568771	0.000679059427861189	0.012237183127197	RP11-446E9.1
ENSG00000158793	537.147312049352	-0.167929184174678	0.0494224284275126	-3.39783352452982	0.000679217384845954	0.012237183127197	NIT1
ENSG00000277476	79.1956668498324	0.27537334066958	0.0810383262832501	3.39806303139922	0.000678647821127961	0.012237183127197	RP11-147L13.13
ENSG00000170946	288.182233213029	0.175952113252917	0.0518048935295917	3.3964380826767	0.000682690007279959	0.0122861570702417	DNAJC24
ENSG00000166780	129.104065390879	-0.376866031753334	0.111048896718741	-3.39369451555959	0.000689565673759471	0.0123961988173516	C16orf45
ENSG00000128563	995.398019978979	-0.155300571768953	0.0457869553259773	-3.39180822710969	0.000694330188368134	0.0124680879580505	PRKRIP1
ENSG00000165501	141.17674457999	-0.245401331371724	0.072380383781068	-3.39043976492304	0.000697805872684888	0.0125167007141176	LRR1
ENSG00000147364	390.939113673436	0.150033316321841	0.0442562998952569	3.39010076931263	0.000698669364909632	0.0125184025811696	FBXO25
ENSG00000108306	1557.08814659175	-0.153838979547068	0.0453841385054566	-3.38970804807876	0.000699670948959235	0.012522572248021	FBXL20
ENSG00000112146	1642.16932634746	0.110837464061938	0.0327122547781164	3.38825509931174	0.000703388116331021	0.0125614936959247	FBXO9
ENSG00000163661	60.7861874990751	0.3734394680864	0.110206838269255	3.38853263509855	0.000702676664761783	0.0125614936959247	PTX3
ENSG00000135482	190.09316766857	-0.2300284857438	0.0679306631589157	-3.38622464505721	0.0007086135003329	0.0126151010827529	ZC3H10
ENSG00000144827	626.240554627027	-0.147937639368617	0.0436885757173199	-3.38618590649016	0.000708713543974879	0.0126151010827529	ABHD10
ENSG00000146109	855.84767028762	-0.116806663750599	0.0344946007096111	-3.38623034758171	0.000708598774481194	0.0126151010827529	ABT1
ENSG00000189077	963.228357977012	-0.193007825963431	0.0570614440186596	-3.38245603984918	0.000718407748556232	0.0127597677216307	TMEM120A
ENSG00000120688	483.015530178252	-0.135846056147497	0.0401608487064731	-3.38254943615277	0.000718163508076589	0.0127597677216307	WBP4
ENSG00000177034	589.023180683372	0.201989717098591	0.0597428729315835	3.38098432812072	0.00072226662217105	0.01281433167244	MTX3
ENSG00000189376	48.2344234329868	-0.347209571287684	0.102802807747276	-3.37743276566185	0.000731658373975447	0.012954353685369	C8orf76
ENSG00000143499	605.619458694937	0.12007556008195	0.0355526777941875	3.3773984839359	0.000731749578838306	0.012954353685369	SMYD2
ENSG00000273559	1888.35906162624	-0.140856340194733	0.0417097825703756	-3.37705764725746	0.000732656932852108	0.0129563338386127	CWC25
ENSG00000249087	28.6314733219563	-0.466052226722226	0.138050464825346	-3.37595550519768	0.000735598144837692	0.0129942375108151	ZNF436-AS1
ENSG00000117281	306.719639938246	0.392954537512733	0.116437768829373	3.37480305113512	0.000738685347834312	0.0130346351681229	CD160
ENSG00000064999	807.853370997609	-0.163707249454496	0.048535107672471	-3.37296561819211	0.000743632376332627	0.0131077278282787	ANKS1A
ENSG00000011198	2541.76939004334	-0.176648088989333	0.052384961870757	-3.37211449013087	0.000745934330390276	0.013127508402204	ABHD5
ENSG00000144136	2647.48144653908	-0.138251378205033	0.0410003635493384	-3.37195493495238	0.000746366597927239	0.013127508402204	SLC20A1
ENSG00000168612	328.340754676905	-0.173689181457316	0.0515237007987866	-3.37105407345673	0.000748811583469802	0.0131436439344842	ZSWIM1
ENSG00000119138	1030.87847583827	0.254257236106154	0.0754243711529687	3.37102228655633	0.000748897990495567	0.0131436439344842	KLF9
ENSG00000221869	10419.7432976677	-0.249853268329694	0.0741453978728749	-3.36977446338715	0.000752297300815539	0.0131890916451913	CEBPD
ENSG00000179967	30.1644853519192	-0.501768109227537	0.148925574018222	-3.36925415621458	0.000753718945991818	0.0131998069606116	PPP1R14BP3
ENSG00000198258	2076.64094755119	-0.191046398669701	0.0567267836777174	-3.36783413907432	0.000757611591090524	0.0132537271579929	UBL5
ENSG00000114120	1122.77405618915	0.173256066551159	0.051455362329279	3.36711391598876	0.00075959304171061	0.0132741329080909	SLC25A36
ENSG00000173273	914.738839284882	-0.145580696858961	0.0432492771261622	-3.36608393324791	0.000762435053759211	0.0133095173853979	TNKS
ENSG00000170464	87.6293869244148	0.23264551368195	0.0691483969716633	3.36443827869629	0.000766996374166126	0.0133748072227449	DNAJC18
ENSG00000167261	3579.57421259948	-0.234338309136806	0.0696689353907285	-3.36359824967257	0.000769334467898511	0.0133869129045545	DPEP2
ENSG00000034713	2458.48086178489	-0.152936453153617	0.0454647275838811	-3.36384844430122	0.000768637397989727	0.0133869129045545	GABARAPL2
ENSG00000122557	2274.63184974899	0.0982101944747938	0.0292129856880079	3.36186775031043	0.000774171922208765	0.0134521873636926	HERPUD2
ENSG00000179832	669.265239168306	0.176710844499152	0.0525664484709641	3.36166603678316	0.000774737627994329	0.0134521873636926	MROH1
ENSG00000170876	2763.79171410223	-0.126357413035666	0.037596484904773	-3.36088369313548	0.000776935344000899	0.0134681355391728	TMEM43
ENSG00000271730	11.9147391669961	0.728116006831035	0.216652797673582	3.36075054026325	0.000777309965421652	0.0134681355391728	RP11-787I22.3
ENSG00000213551	217.294405597174	0.152257671840763	0.0453307004679074	3.35882018740382	0.000782759823093633	0.0135481500942891	DNAJC9
ENSG00000174501	133.382423458345	0.334946235477214	0.0997316021450947	3.35847643347709	0.00078373403691868	0.0135506117402278	ANKRD36C
ENSG00000272630	25.3221504046708	-0.433959348539627	0.129258009815743	-3.35731108005016	0.000787045081353001	0.0135790288559283	RP11-344N10.5
ENSG00000082512	1470.65475915324	0.159593895087863	0.0475323777109766	3.35758282613765	0.000786271827754757	0.0135790288559283	TRAF5
ENSG00000146535	769.149145014645	0.178060992238394	0.0530659193068453	3.35546796445351	0.000792308324820566	0.0136553710966694	GNA12
ENSG00000175213	244.504613061537	-0.223414895901265	0.0665926249285295	-3.3549495329407	0.000793794645644038	0.0136665257860512	ZNF408
ENSG00000237522	55.3897679975007	0.341115520183311	0.101799286892278	3.35086355314328	0.000805599861551391	0.0138551266579593	NONOP2
ENSG00000204427	35.7881462117441	0.388225360721021	0.115898573687045	3.34969921001208	0.000808993589232235	0.0138988170757652	ABHD16A
ENSG00000261360	14.2238120621125	-0.64210749576539	0.191755020071379	-3.34858245445867	0.000812261072201183	0.013901395266442	CTD-2165H16.4
ENSG00000169490	462.425385425298	-0.156681455915328	0.0468001003941465	-3.34788717536436	0.00081430155001853	0.013901395266442	TM2D2
ENSG00000130939	1985.73648007631	-0.108238385579809	0.0323358419826869	-3.34731922668849	0.000815971871720918	0.013901395266442	UBE4B
ENSG00000143379	791.822621423164	0.121475482702889	0.0362799398971191	3.34828235789152	0.000813141201202051	0.013901395266442	SETDB1
ENSG00000179583	2648.22291384931	0.242598506465024	0.0724751760891232	3.3473324185746	0.000815933038705524	0.013901395266442	CIITA
ENSG00000189136	22.7806923985651	0.546560249436398	0.163253585109475	3.3479218791421	0.000814199590065927	0.013901395266442	UBE2Q2P1
ENSG00000253364	37.0740832863081	0.6795606377059	0.202994966720443	3.34767235210203	0.000814932966025354	0.013901395266442	RP11-731F5.2
ENSG00000121742	14.5063448891816	0.96855195328407	0.289279644626867	3.34815107552201	0.000813526506822455	0.013901395266442	GJB6
ENSG00000132205	2937.41989105849	0.228008939867438	0.0681715200202764	3.34463629092649	0.000823905377523171	0.0140218880707627	EMILIN2
ENSG00000187626	246.70942076387	-0.183278021848729	0.0548120842150344	-3.34375210272442	0.000826535581771902	0.0140519676621284	ZKSCAN4
ENSG00000115289	287.907137750935	-0.191707073081358	0.0573530627684564	-3.34257777749919	0.000830040903505186	0.0140968469190709	PCGF1
ENSG00000198838	38.130293655107	0.424485757590874	0.127079473397461	3.34031725378045	0.000836827345931653	0.0141972989408217	RYR3
ENSG00000076984	1343.79248110304	-0.144092672488322	0.0431858050064387	-3.33657488767058	0.000848175746604647	0.0143669475848243	MAP2K7
ENSG00000219200	134.825770393586	0.27975423243666	0.0838481536231267	3.33643879260687	0.000848591120316878	0.0143669475848243	RNASEK
ENSG00000254505	59.6936802458916	0.342400435384117	0.102636459250679	3.33605073561471	0.000849776539394105	0.01437207735941	CHMP4A
ENSG00000158201	1634.73369794575	-0.214393412165656	0.0642895064468615	-3.33481191588961	0.000853571115099887	0.0144212358938336	ABHD3
ENSG00000119318	2840.00526014832	0.118361380339579	0.0354987973625839	3.33423634413974	0.000855339465429068	0.0144212358938336	RAD23B
ENSG00000145075	42.6525624021779	0.507398745636887	0.152172310395566	3.33436973072121	0.000854929354738264	0.0144212358938336	CCDC39
ENSG00000089682	397.20982057818	0.213432100000735	0.0640240475945049	3.33362397442447	0.000857224601231341	0.0144380735059512	RBM41
ENSG00000172819	384.51584643581	-0.173171450987552	0.0519711226778921	-3.33207062046433	0.000862023784864183	0.0145039063885154	RARG
ENSG00000133639	10611.8213422995	-0.126047236542801	0.0378431473631501	-3.33078100859919	0.000866027036503101	0.0145562253287162	BTG1
ENSG00000196924	28455.0099957972	0.187314910694943	0.0562535033266614	3.32983547010779	0.000868973150863261	0.0145812348426773	FLNA
ENSG00000151067	17.5506050425889	0.517101829360936	0.155298473782287	3.32972898423884	0.00086930552171914	0.0145812348426773	CACNA1C
ENSG00000100784	1262.14639453113	-0.182792947683764	0.0549066446140431	-3.32915895641914	0.000871086736110925	0.014596079908476	RPS6KA5
ENSG00000001167	1349.66744065509	0.120404963234693	0.0361726984955567	3.32861434845629	0.000872791679319018	0.0146096177606052	NFYA
ENSG00000163453	145.105831909358	0.316936035885639	0.0952622350883249	3.32698509112014	0.00087791070355548	0.0146802172780371	IGFBP7
ENSG00000261485	50.6989460715041	-0.385734295681092	0.11598222597437	-3.32580524679992	0.000881635061964579	0.0147273746197098	PAN3-AS1
ENSG00000224046	11.7986185793139	-0.532055559431527	0.160111562908609	-3.32303020322912	0.000890452726073673	0.0148594298663544	AC005076.5
ENSG00000178977	397.549572329542	-0.188978103349411	0.0568857534609266	-3.32206381830233	0.000893542543328754	0.0148803815139314	LINC00324
ENSG00000138796	398.273803140377	0.115470890306762	0.0347586116285683	3.32208005143266	0.000893490559265699	0.0148803815139314	HADH
ENSG00000145088	215.982916825383	0.268180200967722	0.080738189148939	3.32160287213039	0.000895019821944473	0.0148803815139314	EAF2
ENSG00000184616	11.2890818986043	0.494303871805493	0.148819651834288	3.32149595643392	0.000895362797547295	0.0148803815139314	SPDYE12P
ENSG00000260005	24.091417055095	0.430226738641714	0.129671205290055	3.31782786841042	0.000907203731283687	0.015061801397979	AC027601.1
ENSG00000277687	51.4276295416548	0.424835731204814	0.128057845685075	3.3175298938699	0.000908171966870568	0.0150625222244612	RP11-427L15.2
ENSG00000233730	109.2849405548	-0.495546912111597	0.149515570269275	-3.31434987820416	0.000918564895102583	0.0152039293155851	RP4-666F24.3
ENSG00000167196	385.292599524588	0.178164003001602	0.0537549974000893	3.31437097234993	0.000918495593574052	0.0152039293155851	FBXO22
ENSG00000273183	38.2957339887188	-0.392928233364524	0.118585532955461	-3.31345842592874	0.00092149805561925	0.0152100718471076	RP11-5C23.2
ENSG00000108651	1491.51213222357	-0.139423565473602	0.0420788815223788	-3.3133857276946	0.000921737638183531	0.0152100718471076	UTP6
ENSG00000173744	2111.20387911371	0.115468571572403	0.0348441762727689	3.31385568332814	0.000920189882488866	0.0152100718471076	AGFG1
ENSG00000103522	424.778088054067	-0.176161206715688	0.0532034730675638	-3.31108471982607	0.000929350675910575	0.0153201765774854	IL21R
ENSG00000181274	11466.6404095676	-0.271264639931038	0.0819568112004515	-3.3098486380537	0.000933464348731684	0.0153572567315658	FRAT2
ENSG00000125458	414.833334873048	-0.195406474517908	0.059038003446044	-3.30984218828629	0.000933485857693258	0.0153572567315658	NT5C
ENSG00000144597	703.388119276578	-0.102345766918791	0.0309255899547615	-3.30942003268182	0.000934894679355678	0.0153649138674732	EAF1
ENSG00000102100	300.710626494135	-0.140112532596615	0.0423591189954926	-3.30773009258112	0.000940554112422633	0.0154423435776486	SLC35A2
ENSG00000275491	38.1223986583977	-0.647882217451194	0.195924477408299	-3.3067956899588	0.000943696938787942	0.015447228182954	RP5-1009E24.8
ENSG00000092421	45.5070842544458	0.362826236741237	0.10971169258768	3.30708813421387	0.000942712269708909	0.015447228182954	SEMA6A
ENSG00000273340	19.1712942599266	0.53874739211997	0.162911723664678	3.3069896997031	0.000943043595512761	0.015447228182954	MICE
ENSG00000109458	583.656248695763	-0.226889647353428	0.0686341603997573	-3.30578309739519	0.000947113735608236	0.0154875917789672	GAB1
ENSG00000141968	4929.47946236539	-0.150914719405574	0.0456696882149138	-3.30448324270127	0.000951516640269574	0.0155335090544197	VAV1
ENSG00000170633	1223.63871648425	-0.133863351860328	0.0405130659730288	-3.30420195670813	0.000952471912035691	0.0155335090544197	RNF34
ENSG00000127022	8332.75140528278	0.156790773081512	0.047453248396476	3.30411043247265	0.000952782927817601	0.0155335090544197	CANX
ENSG00000129317	755.15054999558	0.175143709347578	0.0530213851683672	3.30326544264011	0.000955658801572204	0.0155648149012065	PUS7L
ENSG00000164032	2128.81844466709	-0.12924855551054	0.0391378059419562	-3.30239655493778	0.000958624393189966	0.0155975179739111	H2AFZ
ENSG00000136051	4077.66700819333	0.169461777203126	0.0513281929478485	3.30153405897819	0.000961576597085033	0.0156299381604031	KIAA1033
ENSG00000167447	392.942410267048	-0.201032800696624	0.060900806466752	-3.30098749687946	0.000963451759617521	0.0156388429616379	SMG8
ENSG00000131374	1625.79319649651	0.160076379655473	0.0484960192317847	3.30081483369582	0.0009640448414984	0.0156388429616379	TBC1D5
ENSG00000197054	97.014906697041	-0.343391662143387	0.104119254818647	-3.29806108141575	0.000973549538325629	0.0156546729139986	ZNF763
ENSG00000165175	3000.98215027537	-0.193843195569434	0.0587561609654067	-3.29911267830382	0.00096990970993807	0.0156546729139986	MID1IP1
ENSG00000198876	1673.98525933594	-0.158576155877182	0.048077981548059	-3.29831142596261	0.000972681890564982	0.0156546729139986	DCAF12
ENSG00000145833	2985.79738933317	0.107005754196836	0.0324250094603486	3.30009939789501	0.000966505901471195	0.0156546729139986	DDX46
ENSG00000134900	2749.87502973623	0.1351928558496	0.0409862947349515	3.29848932975913	0.000972065744318645	0.0156546729139986	TPP2
ENSG00000139921	1134.60943552687	0.152345965720344	0.0461884023183324	3.29835971961898	0.000972514596126272	0.0156546729139986	TMX1
ENSG00000087074	6112.70840387438	0.249264769306863	0.0755863393953187	3.29774892263536	0.000974632426769485	0.0156546729139986	PPP1R15A
ENSG00000269858	329.197147878589	0.29892610267876	0.0906054679600374	3.29920599064291	0.000969587343107131	0.0156546729139986	EGLN2
ENSG00000124491	4216.0205763875	0.311677185572405	0.0944554136618661	3.29972813086347	0.000967785331697653	0.0156546729139986	F13A1
ENSG00000184110	157.348111343151	0.347844772337512	0.105476589444365	3.29783864049745	0.000974321078570289	0.0156546729139986	EIF3C
ENSG00000100767	77.1966045314327	0.295660170370091	0.0896771544714717	3.29693969565178	0.000977444856045609	0.0156843786900639	PAPLN
ENSG00000273749	947.9026304305	0.225126973835002	0.068305166375782	3.29589964829985	0.000981070526727716	0.0157270626661558	CYFIP1
ENSG00000122042	2082.80104821016	0.141478267164367	0.0429533081149421	3.29376882417937	0.000988537638529188	0.0158311824176253	UBL3
ENSG00000206527	772.718751314541	0.14014642293757	0.0425534780848478	3.29341875787757	0.000989769407393946	0.0158353382497301	HACD2
ENSG00000196371	354.224288274261	0.163054999765237	0.0495202014215335	3.29269661844174	0.00099231487059338	0.0158604831181103	FUT4
ENSG00000101457	1512.91276914951	-0.160314030050933	0.0487053519018745	-3.29150747897098	0.000996519669492918	0.0159120743696384	DNTTIP1
ENSG00000134294	5739.29977035089	0.149904209818822	0.0455537303831098	3.29071205712722	0.000999341482951998	0.0159415031663459	SLC38A2
ENSG00000169359	372.442461241483	-0.181303590277429	0.0551179683457041	-3.2893736057229	0.00100410643284113	0.0159705873746909	SLC33A1
ENSG00000172671	305.922647328579	0.152355684658691	0.046313658432606	3.28964909736928	0.00100312395400972	0.0159705873746909	ZFAND4
ENSG00000215302	88.4296682831745	0.295468008683008	0.0898202664697693	3.28954722910394	0.00100348714046562	0.0159705873746909	CTD-3092A11.1
ENSG00000237668	12.5252609710179	-0.513394321967301	0.156134401924121	-3.28815632967809	0.00100845824626932	0.0159929498120628	RPS15AP38
ENSG00000149428	1469.18216951782	0.1467813265887	0.0446358275859701	3.28841951694508	0.00100751586395891	0.0159929498120628	HYOU1
ENSG00000272578	55.9357252530971	0.326536892796995	0.0993030701088301	3.28828597584275	0.00100799392640024	0.0159929498120628	AP000347.2
ENSG00000172824	69.0851293460992	0.352037762088695	0.107087113803859	3.2873961168987	0.00101118488878163	0.016020591715551	CES4A
ENSG00000170854	400.006208177223	0.165736142098693	0.0504374146999458	3.28597615648351	0.00101629612278951	0.0160859231796626	MINA
ENSG00000134852	479.564819325711	0.183706596528823	0.0559132804159742	3.28556284235362	0.00101778835932394	0.0160939019498145	CLOCK
ENSG00000169914	388.514916550533	0.172212846464133	0.0524496904585512	3.28339109265527	0.00102566266119952	0.01620268454215	OTUD3
ENSG00000269246	13.9723779237321	-0.737197342267848	0.224607148304514	-3.28216331418083	0.00103013923454185	0.016257633442813	CTC-246B18.10
ENSG00000084070	25987.9995994364	-0.164998816077074	0.050290851507315	-3.2808912780702	0.00103479624048739	0.0163153207829798	SMAP2
ENSG00000181220	2668.71840804982	-0.218994060600351	0.0667657946025316	-3.28003376435585	0.00103794663895413	0.0163267840889923	ZNF746
ENSG00000136003	3073.11401493572	-0.14164265774763	0.0431839416247438	-3.27998446687579	0.00103812802126048	0.0163267840889923	ISCU
ENSG00000125676	2498.68551419828	0.127599864620129	0.0389146984632096	3.27896321079715	0.00104189217603201	0.0163267840889923	THOC2
ENSG00000068796	2156.66412943131	0.199567167308098	0.0608661451796066	3.27878768598218	0.00104254039740603	0.0163267840889923	KIF2A
ENSG00000188647	2472.91865969299	0.210996089467077	0.064350345078072	3.27886492622672	0.00104225509959676	0.0163267840889923	PTAR1
ENSG00000179630	204.588748975435	0.243274936956962	0.0741925131843987	3.27896881390612	0.00104187148963186	0.0163267840889923	LACC1
ENSG00000075391	28.5344855101113	0.417744768580268	0.127389218850477	3.27927883026425	0.00104072751670151	0.0163267840889923	RASAL2
ENSG00000179241	104.812858523194	0.289793163375883	0.0884186702451222	3.27751098916657	0.00104726653918522	0.016385043346503	LDLRAD3
ENSG00000271553	39.2630749089541	-0.537981783974092	0.16418579741243	-3.27666456205526	0.00105041080647087	0.0164160625979194	RP11-274B21.10
ENSG00000261136	31.2874389272976	-0.480006164866742	0.146502574413182	-3.2764350168549	0.00105126501440596	0.0164160625979194	RP11-37C7.3
ENSG00000108239	174.660582500601	0.277434438699608	0.0847063088760395	3.27525118708229	0.00105568062106491	0.0164692244016132	TBC1D12
ENSG00000138756	704.689163458701	0.192624078873038	0.0588304585703478	3.27422365138806	0.00105952716542849	0.0165013035372589	BMP2K
ENSG00000100385	3814.33630600415	0.259847781765158	0.0793631727360332	3.27416070712581	0.00105976321606022	0.0165013035372589	IL2RB
ENSG00000089053	2318.85807602051	0.0897392124656185	0.0274112072281205	3.27381467437002	0.00106106176109898	0.0165057429828263	ANAPC5
ENSG00000069966	319.259057542933	0.161821919884414	0.0494440579544387	3.27282845662726	0.00106477078658596	0.0165476353064175	GNB5
ENSG00000235079	9.63798953552654	0.696639737258765	0.212881812592922	3.27242486698897	0.00106629208576736	0.0165554806490876	ZRANB2-AS1
ENSG00000125449	462.625793981979	-0.162891278817694	0.0498054420881762	-3.27055181097097	0.00107337877805645	0.0166460065944773	ARMC7
ENSG00000147274	4362.555993635	0.0920042880349403	0.0281329743927475	3.27033632315317	0.00107419686295991	0.0166460065944773	RBMX
ENSG00000196628	716.477702418246	0.282306297461735	0.0863302140845337	3.2700752622402	0.00107518873564132	0.0166460065944773	TCF4
ENSG00000108953	3716.25554336881	-0.127605489161361	0.0390380422139522	-3.26874714828182	0.00108024789170373	0.0167084495842153	YWHAE
ENSG00000226167	33.3147464703479	0.432756239595466	0.132434158338974	3.267708611005	0.0010842193004645	0.0167539656040467	AP4B1-AS1
ENSG00000181827	810.940082104724	0.187742913981538	0.0574611340762314	3.26730262115028	0.00108577549028228	0.0167621093935805	RFX7
ENSG00000272034	30.9176282980909	-0.486686632089135	0.148973511092911	-3.26693402416757	0.00108719013935385	0.0167680547345229	SNORD14A
ENSG00000134709	257.041036083544	0.256391158496582	0.0785065032763654	3.26585884985874	0.00109132632634327	0.0168159241978741	HOOK1
ENSG00000233231	25.3861502981356	0.47348289183193	0.145066823816277	3.26389507522122	0.00109891853955656	0.0169169057218882	HNRNPA1P49
ENSG00000267288	14.2673343255698	-0.649576970420942	0.199077090396983	-3.26294185396024	0.00110262140152269	0.0169337732413916	RP13-890H12.2
ENSG00000040633	1241.03743130156	-0.158628498352095	0.0486171380886273	-3.26281028848142	0.001103133383012	0.0169337732413916	PHF23
ENSG00000205710	9.87600797779565	0.737539753694439	0.226017311982649	3.26320027092022	0.0011016164224689	0.0169337732413916	C17orf107
ENSG00000157429	43.5126453245713	-0.318847117217791	0.0978172501081395	-3.25962053590034	0.00111561364533066	0.0171092273460456	ZNF19
ENSG00000183255	3990.10153011688	-0.122605728333224	0.0376186478961418	-3.2591742444257	0.0011173701842027	0.0171179863476279	PTTG1IP
ENSG00000133858	2828.9512843592	0.196017023572019	0.06014744882428	3.25894160772604	0.00111828682224327	0.0171179863476279	ZFC3H1
ENSG00000269514	27.0903297495739	-0.474780460389234	0.145741884817522	-3.25768025426382	0.00112326893885481	0.0171351502370783	RP11-370I10.12
ENSG00000131944	67.8994127666131	-0.365327087339585	0.112162149419834	-3.25713343787779	0.00112543513382443	0.0171351502370783	FAAP24
ENSG00000181135	295.973250834579	-0.167193116024726	0.051324974211728	-3.25753921151549	0.00112382730581022	0.0171351502370783	ZNF707
ENSG00000143376	3099.15229873679	-0.156404362487644	0.0480194263902732	-3.25710601406363	0.00112554387399041	0.0171351502370783	SNX27
ENSG00000077721	1398.6865484351	-0.0776801381963342	0.0238497612501715	-3.2570614599245	0.00112572055956737	0.0171351502370783	UBE2A
ENSG00000140968	2407.39115335123	0.186165633692011	0.0571555149188025	3.25717708879861	0.00112526207040738	0.0171351502370783	IRF8
ENSG00000112763	3460.89528728935	-0.150711030412792	0.0463058575676712	-3.25468608787869	0.00113517763556149	0.0172629674606816	BTN2A1
ENSG00000167962	649.26973478484	0.149570875510345	0.0459799761887808	3.25295678484585	0.00114210865291881	0.0173439873102478	ZNF598
ENSG00000106392	1407.35433007594	0.185356762760747	0.0569833039891123	3.25282582414251	0.00114263513132534	0.0173439873102478	C1GALT1
ENSG00000143870	1470.99359369676	0.150957459418707	0.0464183431497332	3.25210787752072	0.001145525354634	0.0173580808337711	PDIA6
ENSG00000182150	566.637882060462	0.181804335508722	0.0559042619024372	3.2520657517311	0.00114569514927881	0.0173580808337711	ERCC6L2
ENSG00000163833	13.7157925545055	0.642756808370495	0.197696715909154	3.25122653360542	0.00114908260212219	0.0173932233650224	FBXO40
ENSG00000135437	24.409285113972	0.54388333280897	0.167299337011348	3.25095928367055	0.00115016328207796	0.0173934163186665	RDH5
ENSG00000166579	3608.12974587213	-0.180232491656728	0.0554609919242542	-3.24971633942069	0.0011552017374318	0.0174372295621425	NDEL1
ENSG00000141551	4454.57669781695	-0.117990749282714	0.036307563405261	-3.24975675083767	0.00115503760354722	0.0174372295621425	CSNK1D
ENSG00000234436	17.3779455574403	0.619768749746131	0.19082042931539	3.24791612706085	0.00116253533644778	0.0175316787265973	AC008984.7
ENSG00000162980	424.306975230107	0.217202870805648	0.06688914592618	3.24720652055203	0.00116543789374542	0.0175591923917036	ARL5A
ENSG00000257715	18.615693636563	-0.620443227991706	0.191192308326009	-3.24512650861333	0.00117398455541691	0.0176716140980362	RP11-256L6.2
ENSG00000197782	590.138791247587	-0.227909205832419	0.0702683357011622	-3.24341260623667	0.00118107037449402	0.0177006550887684	ZNF780A
ENSG00000119559	558.557006536396	-0.167587384482519	0.0516664844291615	-3.24363823732373	0.00118013529020577	0.0177006550887684	C19orf25
ENSG00000163755	915.455689044576	0.128339307738805	0.0395763720739263	3.24282648998435	0.00118350261958026	0.0177006550887684	HPS3
ENSG00000177082	88.5611694135316	0.241140056481225	0.0743548597170649	3.24309745723159	0.00118237759436381	0.0177006550887684	WDR73
ENSG00000225614	119.305402482823	0.303039641242425	0.0934219809151659	3.24377237855412	0.0011795796921708	0.0177006550887684	ZNF469
ENSG00000161509	20.4767705625779	0.506857448216277	0.156301349233289	3.24282196348645	0.00118352142148148	0.0177006550887684	GRIN2C
ENSG00000121594	12.6104234486718	0.623839159436656	0.19233442544256	3.24351274090016	0.00118065530133648	0.0177006550887684	CD80
ENSG00000270179	31.0735634578699	-0.417232847991682	0.128731946527835	-3.24109795000626	0.00119070263164199	0.0177917190472964	RP11-159N11.4
ENSG00000226696	69.4564068790615	0.308176001276791	0.0951052598211944	3.24036758698926	0.00119375701007878	0.0178210086371706	LENG8-AS1
ENSG00000187984	41.9148820012034	-0.350679174949642	0.108244784674096	-3.23968656786069	0.00119661155231984	0.0178472640591879	ANKRD19P
ENSG00000107104	193.805346435758	0.422538242234332	0.130457399885962	3.23889823500766	0.0011999237822755	0.0178802915296624	KANK1
ENSG00000168813	815.152210689882	0.170525110790953	0.0526575161984311	3.23838120560714	0.00120210071063654	0.0178963567405277	ZNF507
ENSG00000164597	912.528669411424	0.172998932901457	0.0534278308539246	3.23799282389824	0.00120373837290285	0.0179043715794235	COG5
ENSG00000122566	17910.7832324682	0.0944846554152023	0.0291943220150909	3.23640519435122	0.00121045427567757	0.0179878364853654	HNRNPA2B1
ENSG00000180425	138.814619419922	-0.242977718188155	0.0750957747764974	-3.23557109452981	0.00121399649115185	0.0180187969114342	C11orf71
ENSG00000092439	1902.39932838388	0.149251742424468	0.0461309344201604	3.23539386965553	0.00121475035357983	0.0180187969114342	TRPM7
ENSG00000112983	1717.4272552219	-0.125078790836611	0.0386714205912326	-3.23439865731149	0.00121899173170382	0.0180652578109738	BRD8
ENSG00000103249	917.800646655824	0.183319328208825	0.0566839741885772	3.23405919985348	0.00122044155102547	0.0180703014014108	CLCN7
ENSG00000102349	167.578428919512	0.315538590192371	0.0975966902475656	3.23308699702797	0.00122460263653153	0.0181154433616612	KLF8
ENSG00000126003	1291.36294519163	-0.162185718722896	0.0501854013503188	-3.2317310285268	0.00123042814681116	0.0181851027469268	PLAGL2
ENSG00000213398	140.79639143529	-0.288709424832855	0.0893890291079528	-3.22980826298256	0.0012387326146641	0.0182293625990502	LCAT
ENSG00000138386	802.754898247869	-0.178806746343788	0.055362545549399	-3.22974214009437	0.00123901911936812	0.0182293625990502	NAB1
ENSG00000184208	455.028466931378	0.158553748873363	0.0490876355663875	3.23001397488233	0.00123784167414305	0.0182293625990502	C22orf46
ENSG00000163013	501.659156343136	0.190409008892537	0.0589490182514855	3.23006242581043	0.00123763191875493	0.0182293625990502	FBXO41
ENSG00000247240	50.7316185186798	0.27690157430619	0.0857159616356307	3.23045520370253	0.00123593270270957	0.0182293625990502	UBL7-AS1
ENSG00000125498	68.4550999419931	0.657673500325327	0.203648518098757	3.22945389667111	0.00124026876790666	0.0182312792625413	KIR2DL1
ENSG00000147548	3896.08171690268	0.111296368890179	0.034470802176052	3.22871421215432	0.00124348091860948	0.0182620141761881	WHSC1L1
ENSG00000260022	25.4870105277382	-0.516568265408786	0.160118092368517	-3.22617049558576	0.00125458597592748	0.0184085061170548	LA16c-306A4.1
ENSG00000059728	26153.5399329489	-0.215762766850739	0.06690270889507	-3.22502287895607	0.00125962601958279	0.0184658226651169	MXD1
ENSG00000244045	189.067865497007	-0.172985784734853	0.0536485850498624	-3.22442399131451	0.00126226360049275	0.0184712374314693	TMEM199
ENSG00000188313	1573.46580001531	0.304378721228611	0.0943977043102661	3.22442927455291	0.00126224031013106	0.0184712374314693	PLSCR1
ENSG00000005436	311.079403444762	0.150688263526998	0.0467400480218484	3.22396467065158	0.00126428996390937	0.0184842824436193	GCFC2
ENSG00000158716	352.575379546429	-0.199221943330911	0.0618081954700699	-3.22322859963421	0.00126754351756467	0.0185109109550167	DUSP23
ENSG00000108932	669.383056608375	-0.188919036923757	0.0586151944264402	-3.22303864675981	0.00126838439404425	0.0185109109550167	SLC16A6
ENSG00000170089	116.41272684454	-0.306935124114167	0.0952753817837422	-3.22155753530176	0.00127495860840037	0.0185699325571494	RP11-423H2.1
ENSG00000064547	2406.82690622793	-0.298940054729373	0.0928067798387157	-3.22110146746699	0.00127698928372366	0.0185699325571494	LPAR2
ENSG00000080986	157.662074073162	-0.230150610580707	0.0714466580098356	-3.2212928776742	0.00127613665249164	0.0185699325571494	NDC80
ENSG00000234389	263.087712040521	0.731002354975559	0.226919238912634	3.22142079480973	0.00127556714230187	0.0185699325571494	AC007278.3
ENSG00000155621	204.824264736611	-0.169493514369005	0.0526295594579978	-3.22050034456916	0.00127967038853579	0.018592320801144	C9orf85
ENSG00000105617	391.849460272537	-0.158100546765173	0.0491137116504321	-3.21907144567809	0.00128606437708275	0.0186685655165301	LENG1
ENSG00000278090	56.4158413397955	-0.501753549492823	0.155940007639053	-3.21760629032551	0.001292651215694	0.0187474713713341	RP11-6O2.2
ENSG00000273599	72.8142645712472	0.390124762887473	0.121287655474693	3.21652489167683	0.0012975327721839	0.0188015269222056	RP11-59C5.3
ENSG00000100372	222.006743386522	-0.168312172184887	0.0523371923887496	-3.21591901481263	0.00130027520039132	0.0188104928256235	SLC25A17
ENSG00000138032	2387.14188765508	-0.0950813934960081	0.0295662322609343	-3.21587791967793	0.00130046140613079	0.0188104928256235	PPM1B
ENSG00000174021	1751.60665603874	-0.156922329764584	0.0488144778682547	-3.2146677915536	0.00130595564997252	0.0188732029024867	GNG5
ENSG00000165178	6150.77679754946	-0.282765513651356	0.0880443528941125	-3.21162578128579	0.00131986178282449	0.0190572596248781	NCF1C
ENSG00000146576	961.191607965961	0.132055010351439	0.0411326882967655	3.21046388698653	0.00132520918932151	0.0191175217595035	C7orf26
ENSG00000106399	232.029524974416	-0.180038227177661	0.0560973732298003	-3.20938783425996	0.0013301793482779	0.0191552882806385	RPA3
ENSG00000179833	1497.57895327487	-0.162895311277245	0.0507550755518794	-3.20943884933717	0.00132994332789992	0.0191552882806385	SERTAD2
ENSG00000257365	142.519932569262	-0.214601568888592	0.0668840885019546	-3.20855937032498	0.00133401763625756	0.019193591202939	FNTB
ENSG00000257315	16.1488358310701	0.684919361122655	0.213486033047863	3.2082630949871	0.00133539276393062	0.0191964183108013	ZBED6
ENSG00000260924	16.1960908930471	-0.508400062665002	0.15850536887208	-3.20746272686385	0.00133911412114222	0.0192329379991564	LINC01311
ENSG00000151458	420.181210729259	0.246431480326874	0.0768373202370058	3.20718473219462	0.00134040891029088	0.0192345726184208	ANKRD50
ENSG00000121542	201.55976105032	-0.170978563805959	0.0533369954353933	-3.20562795879763	0.00134768111408782	0.019291640637218	SEC22A
ENSG00000198912	636.705843118107	-0.140978802717179	0.0439792854364471	-3.20557283544095	0.00134793927949617	0.019291640637218	C1orf174
ENSG00000242588	40.3899980991627	0.401678729700872	0.125296181001904	3.20583378111714	0.00134671756637458	0.019291640637218	RP11-274B21.14
ENSG00000253352	3158.681173735	0.149821184973793	0.0467543304587832	3.20443440219659	0.00135328124308577	0.0193439660017712	TUG1
ENSG00000053254	3605.3258076785	0.159188291478208	0.0496797738018438	3.20428776735493	0.00135397072769811	0.0193439660017712	FOXN3
ENSG00000120802	2938.57069445438	0.127758744824732	0.0398774632105642	3.20378315315922	0.00135634592687701	0.0193609168370253	TMPO
ENSG00000156313	673.971409097295	-0.167574885124384	0.0523159873034377	-3.20312955488031	0.00135942810156838	0.0193741105868503	RPGR
ENSG00000184307	146.490732422709	0.197560642620618	0.0616782834800408	3.20308269740595	0.00135964931545219	0.0193741105868503	ZDHHC23
ENSG00000100150	386.786556817064	-0.165065553236057	0.0515628574967841	-3.20124914035944	0.00136833164399581	0.0194807845155243	DEPDC5
ENSG00000142252	120.967903447333	-0.245711522774969	0.0768153793469758	-3.19872823468186	0.00138035223150647	0.0196347570258042	GEMIN7
ENSG00000262370	872.289619956964	-0.308776586757804	0.0965578164451887	-3.1978414397252	0.00138460389276287	0.0196780485178263	RP11-473M20.9
ENSG00000175087	337.180817216827	-0.160589374593848	0.0502295948207576	-3.19710670904085	0.00138813563973988	0.0197066493124304	PDIK1L
ENSG00000147140	7328.97349641533	0.0620331060209642	0.0194040242763259	3.19691962541237	0.00138903625042489	0.0197066493124304	NONO
ENSG00000176396	399.794769858249	-0.142378477273285	0.0445479123616662	-3.1960751856871	0.00139310804752445	0.0197472156397135	EID2
ENSG00000143207	2570.57153694049	-0.142758728820872	0.0447097820453068	-3.19300882916868	0.00140798641437926	0.0199366014943813	RFWD2
ENSG00000137496	389.730807935435	0.145824476198638	0.0456726543709555	3.19281807039819	0.00140891682446325	0.0199366014943813	IL18BP
ENSG00000170234	1061.2215081013	-0.0891651896037568	0.0279467008433691	-3.19054439031979	0.00142005024079001	0.0200766998886691	PWWP2A
ENSG00000247271	116.079483105211	-0.191066369584936	0.0598900072107471	-3.19028797095636	0.0014213109131684	0.0200770952669329	ZBED5-AS1
ENSG00000233750	44.5663465209399	-0.545592986017526	0.171053973188407	-3.18959551682897	0.00142472048479188	0.0201078184885662	CICP27
ENSG00000175548	221.670814894423	0.233442148828174	0.0732075038160527	3.18877350899356	0.00142877775304864	0.0201476218735092	ALG10B
ENSG00000105967	1122.18104301305	0.293752803764558	0.0921311038673522	3.18842162346709	0.00143051784401049	0.0201547094510371	TFEC
ENSG00000272906	11.1615619043742	-0.647953341931308	0.203239674563652	-3.18812428391474	0.00143198972508778	0.0201580092070048	RP11-533E19.7
ENSG00000067082	14570.6845804479	0.183447924809185	0.0575494465844918	3.18765749623419	0.00143430321941149	0.0201731403579922	KLF6
ENSG00000165521	52.3826886577127	0.350840758095145	0.110081179807598	3.18710935609839	0.00143702431118159	0.0201939732150255	EML5
ENSG00000004487	1119.44472830256	0.0953767605684196	0.0299429283448723	3.18528500185096	0.00144611513061885	0.0202578013706526	KDM1A
ENSG00000163512	469.358774348574	0.175819289623837	0.0551914322262138	3.18562650998446	0.0014444093616775	0.0202578013706526	AZI2
ENSG00000213204	42.5158346767146	0.403807642581435	0.126760612590555	3.18559238811632	0.00144457971056595	0.0202578013706526	RP3-382I10.7
ENSG00000270878	12.4036071965961	0.660377548478995	0.20732689163855	3.18519967795728	0.00144654159722902	0.0202578013706526	CTD-2302E22.5
ENSG00000260526	15.0985193555394	-0.608132189729687	0.190994663658934	-3.18402712452558	0.00145241401822007	0.0203225662497855	RP11-73K9.2
ENSG00000168386	39.6719325601726	-0.441534091710767	0.138719171335499	-3.1829348997688	0.00145790389263713	0.0203643916804297	FILIP1L
ENSG00000028116	345.440373675416	0.216441518010546	0.0679995518729705	3.18298447635182	0.00145765429096263	0.0203643916804297	VRK2
ENSG00000241685	235.900828725933	-0.224032225020711	0.0703948807831198	-3.18250734326739	0.0014600581332872	0.0203770066982422	ARPC1A
ENSG00000073050	631.716056536541	-0.116714771158458	0.0366904802592427	-3.18106414344511	0.00146735136829333	0.0204612600474259	XRCC1
ENSG00000207721	10.8809431693216	0.780304293929809	0.245333197681964	3.18058991323853	0.00146975521755692	0.0204772482706155	MIR186
ENSG00000231616	11.1284103999336	0.700919949230175	0.220483374700837	3.17901497190534	0.00147776457952843	0.0205712407750252	RP11-575L7.4
ENSG00000123427	53.6974076218303	-0.386828932610732	0.121804146743651	-3.17582728463959	0.00149409877714083	0.0207623350833621	METTL21B
ENSG00000147168	2855.61864220661	-0.189742625517766	0.0597503359877737	-3.17559093820982	0.00149531645194227	0.0207623350833621	IL2RG
ENSG00000152795	8903.8198728992	0.133589894082279	0.0420627010985986	3.17597041067649	0.00149336182510642	0.0207623350833621	HNRNPDL
ENSG00000115827	547.48524204651	0.163035130746852	0.0513495613510914	3.17500532540356	0.00149833751415383	0.0207865614080267	DCAF17
ENSG00000109390	338.963297865679	-0.199961293271657	0.0629871270947779	-3.17463746156848	0.00150023812648654	0.0207952156307117	NDUFC1
ENSG00000270120	24.1649399164381	0.591054496420823	0.186221200785174	3.17393773602968	0.00150385947372997	0.0208276864359184	RP11-327F22.6
ENSG00000229980	13.0230014811543	-0.514943196705652	0.162302034337955	-3.17274640953301	0.00151004357629468	0.0208955647639009	TOB1-AS1
ENSG00000136541	222.53197256913	-0.327750929735672	0.103337641586578	-3.17165095606596	0.00151575067359449	0.0209047997261665	ERMN
ENSG00000163684	379.101983089189	-0.133273378901546	0.0420236877985649	-3.17138704105109	0.00151712858576342	0.0209047997261665	RPP14
ENSG00000111540	4625.99840528181	-0.0893368700357847	0.0281657791914901	-3.1718231343224	0.00151485234464885	0.0209047997261665	RAB5B
ENSG00000176624	1301.94143007238	0.164451816021648	0.0518513598170328	3.17160083365117	0.00151601227626499	0.0209047997261665	MEX3C
ENSG00000207741	12.6764870358759	0.657656388570223	0.207319851487921	3.17218242175202	0.00151297936493624	0.0209047997261665	MIR590
ENSG00000114988	217.911397634028	-0.131612029388512	0.0415198717970529	-3.16985635292481	0.00152514315650267	0.0209974696449358	LMAN2L
ENSG00000228393	38.9215520431422	-0.347602670066755	0.109689311973723	-3.16897484186996	0.00152977636157294	0.0210434692575494	LINC01004
ENSG00000166532	422.533404925784	0.194236855373641	0.0613011842069154	3.16856611966933	0.0015319289934871	0.0210552974826366	RIMKLB
ENSG00000178104	796.555695561223	0.154753659211471	0.0488545351004576	3.16764163026539	0.0015368083311081	0.021104550833691	PDE4DIP
ENSG00000262152	10.9974122484402	-0.604629498788368	0.19093791620575	-3.16662877024821	0.00154217050598461	0.0211315620860187	LA16c-380H5.1
ENSG00000240065	3820.38479468442	-0.209361256309095	0.0661168292303937	-3.16653503723757	0.00154266760731112	0.0211315620860187	PSMB9
ENSG00000148925	844.021924294672	-0.150868513615952	0.0476432568399251	-3.16662889195105	0.00154216986064466	0.0211315620860187	BTBD10
ENSG00000176896	269.311436532646	-0.14594058040103	0.0461353485307365	-3.16331370735826	0.00155984147596132	0.0213309304105643	TCEANC
ENSG00000028203	710.72598658074	0.115727505888772	0.0365835116711545	3.16337881745839	0.00155949261835815	0.0213309304105643	VEZT
ENSG00000169410	769.99273949021	0.114771586861296	0.0363061322127677	3.16121767498369	0.00157111040882423	0.0214670094198995	PTPN9
ENSG00000007923	402.095541499504	0.123480551589261	0.0390674609085162	3.16070071403959	0.00157390125422547	0.0214871162846356	DNAJC11
ENSG00000143793	502.442583277225	-0.132081030034291	0.0417921567462288	-3.16042626936715	0.00157538471477277	0.0214893558203552	C1orf35
ENSG00000259628	27.4576455637212	-0.628144240503062	0.19880484963039	-3.15960220120828	0.00157984680430614	0.0215099678817914	RP11-467H10.2
ENSG00000080802	793.630962114619	-0.103125240156306	0.0326406042587644	-3.15941577976809	0.00158085783474577	0.0215099678817914	CNOT4
ENSG00000180385	36.6757188326555	0.356142768579445	0.112722803671182	3.15945626776932	0.0015806382031458	0.0215099678817914	EMC3-AS1
ENSG00000151229	116.781630890139	0.289105691256666	0.0915159598594786	3.15907402053788	0.00158271286499981	0.0215172324142336	SLC2A13
ENSG00000120693	35.90178245726	-0.376554353422065	0.119208426698538	-3.1587897252794	0.00158425751404511	0.0215202686665994	SMAD9
ENSG00000204217	668.901490900091	0.185403981447816	0.0587197334490007	3.15743908491756	0.00159161486639288	0.0215483219691944	BMPR2
ENSG00000102189	872.465802395589	0.214181144335338	0.067822527989399	3.15796462745853	0.00158874834457502	0.0215483219691944	EEA1
ENSG00000146070	291.771752264388	0.343827828387538	0.108894262502167	3.15744668715392	0.00159157336680076	0.0215483219691944	PLA2G7
ENSG00000006453	26.062505165918	0.490649739743689	0.155385100308601	3.15763698558767	0.00159053487758433	0.0215483219691944	BAIAP2L1
ENSG00000167257	354.83858049947	0.144218129737757	0.0457098529094479	3.15507752832755	0.00160455461334553	0.0217054659365105	RNF214
ENSG00000162946	493.47578568416	-0.219151571454285	0.0694725254399244	-3.15450705248644	0.00160769492608177	0.0217298981419866	DISC1
ENSG00000101181	843.93261094596	-0.145643806727768	0.0462037149769177	-3.15220987750722	0.00162039758311171	0.0218834290515261	MTG2
ENSG00000197483	158.302519468385	0.272653198537499	0.0865122378798309	3.15161421342753	0.00162370646684478	0.0219099479913015	ZNF628
ENSG00000154822	2884.25304929533	0.107654903215649	0.034165146320952	3.15101542971086	0.00162703894656421	0.0219367411611683	PLCL2
ENSG00000120647	253.140540163468	-0.203618399691191	0.0646317775858222	-3.15043786968127	0.00163025927046634	0.0219619791051161	CCDC77
ENSG00000166747	3291.02945588631	-0.0985055076503668	0.0312758892757732	-3.14956696456496	0.00163512630268094	0.0220093405717062	AP1G1
ENSG00000272518	16.9608028670068	0.5037689093443	0.159993695609677	3.14867974906524	0.00164009823165246	0.0220580345986157	RP11-26J3.3
ENSG00000069493	3204.7120403943	-0.16267941512294	0.0516788522230353	-3.1478914125424	0.00164452771471517	0.022099358819774	CLEC2D
ENSG00000140678	23442.5221039635	-0.250013434600089	0.079511905450843	-3.14435219710156	0.00166454973016657	0.0223499764676199	ITGAX
ENSG00000188021	1359.39951874626	-0.111309442903017	0.035404786886232	-3.14390941712752	0.00166707034392773	0.0223653827772248	UBQLN2
ENSG00000169045	13881.1303564478	0.14828497547686	0.0472002156797399	3.14161648080159	0.0016801796141287	0.0225054187673384	HNRNPH1
ENSG00000136925	195.683334193147	0.182051927184727	0.0579487855343936	3.14160038913457	0.00168027194824605	0.0225054187673384	TSTD2
ENSG00000175701	141.998539831081	-0.252663607033538	0.0804619601691867	-3.14016221457027	0.00168854308256168	0.0225962837722864	LINC00116
ENSG00000139998	157.918702874365	0.246786026414137	0.0785958053540939	3.13993889753154	0.00168983076285656	0.0225962837722864	RAB15
ENSG00000114268	2032.50004018109	-0.197411261173866	0.0628785698190898	-3.13956347515291	0.00169199754173828	0.0226066972619289	PFKFB4
ENSG00000125735	1821.24251267486	-0.295928487300502	0.0943146489348911	-3.13767257411723	0.00170294992570676	0.0226600861437795	TNFSF14
ENSG00000159128	4396.88641279217	-0.187659853322498	0.0598063549530072	-3.13779118406316	0.00170226100677514	0.0226600861437795	IFNGR2
ENSG00000205138	253.685879283265	-0.169326713861419	0.0539574494340774	-3.13815266728451	0.00170016299437813	0.0226600861437795	SDHAF1
ENSG00000031823	1604.14688926024	-0.0940294548062506	0.0299672937339578	-3.13773594776428	0.00170258180237353	0.0226600861437795	RANBP3
ENSG00000196123	119.13384355411	0.294427911625922	0.0938091777227065	3.13858322579301	0.0016976671795641	0.0226600861437795	KIAA0895L
ENSG00000197062	406.911489767001	-0.146690978498927	0.0467575111967333	-3.13727088428042	0.00170528495519925	0.0226726335227185	ZSCAN26
ENSG00000161904	1542.47899602357	-0.107694964425683	0.0343382506103169	-3.13629735095841	0.00171095634243077	0.0227109583937815	LEMD2
ENSG00000215630	11.5927757989549	0.655337956016816	0.208943160774721	3.1364412866492	0.00171011674352045	0.0227109583937815	GUSBP9
ENSG00000109133	1754.78277895563	-0.132453604679393	0.0422526735831795	-3.13479819019362	0.00171972374249025	0.0228087464120022	TMEM33
ENSG00000177337	201.312064350694	-0.2350166418517	0.0749921783146442	-3.13388205454764	0.00172510181152043	0.0228614590758611	DLGAP1-AS1
ENSG00000005007	4865.13763504309	-0.156506327144023	0.0499630721246784	-3.13244002997805	0.00173359839134668	0.0229553796746857	UPF1
ENSG00000111786	1417.57428300848	0.102219908245738	0.0326486548665971	3.13090718938988	0.00174267224994018	0.0230567854872264	SRSF9
ENSG00000170956	2913.3779015809	-0.270062499625585	0.0863771469118917	-3.12655035829164	0.0017687021007698	0.0233821843467838	CEACAM3
ENSG00000239789	71.0661745500684	-0.224510896800642	0.0718211817913195	-3.12597051734642	0.0017721931783168	0.0233904618803695	MRPS17
ENSG00000143178	112.839414618406	-0.216652310714338	0.0693072420270031	-3.12596929812799	0.00177220052559562	0.0233904618803695	TBX19
ENSG00000253522	132.431304993376	-0.289200802316877	0.0925424341260913	-3.12506154660719	0.00177767861453443	0.0234349404811489	MIR3142HG
ENSG00000101190	308.879341040677	-0.14262752968999	0.0456417702165964	-3.12493422172586	0.00177844823691902	0.0234349404811489	TCFL5
ENSG00000260296	67.197175952315	-0.348820039905643	0.111663596422862	-3.12384744070652	0.00178502982099984	0.0235026521379341	RP11-395I6.3
ENSG00000268355	23.1381793222904	0.509249797063057	0.163076737140352	3.12276175003901	0.0017916271502164	0.0235704615473138	AC006129.1
ENSG00000229419	10.9050396729494	0.536496652097589	0.171820284724751	3.12242907149778	0.00179365319258921	0.023578070659968	RALGAPA1P1
ENSG00000259529	37.0288627357835	0.534390679399835	0.171210516859668	3.1212491452137	0.00180085604193249	0.0236536631894794	RP11-468E2.4
ENSG00000234290	222.69343918223	0.249035830474207	0.0798037716738094	3.12060226291206	0.0018048162023684	0.023686576541478	AC116366.6
ENSG00000255389	73.5267784061631	-0.301755871607982	0.0967590503546531	-3.11863200911904	0.00181692729966735	0.023826324420034	C6orf3
ENSG00000172667	783.742524995294	0.157591677304382	0.0505431785932341	3.11796134890255	0.00182106683832645	0.0238613962959155	ZMAT3
ENSG00000167797	1090.09990411525	-0.1431856667787	0.0459359845104842	-3.11706972876612	0.00182658363596821	0.0239144434718763	CDK2AP2
ENSG00000177721	420.977500124987	-0.189900626171538	0.0609294484674578	-3.11672977432191	0.00182869110618703	0.0239228048566009	ANXA2R
ENSG00000216895	56.7998577442557	-0.308075198148521	0.0989051921144689	-3.11485364481136	0.00184036198908112	0.0239983792763525	AC009403.2
ENSG00000174842	161.176938180869	-0.221633524011817	0.0711495391098778	-3.1150380843584	0.0018392116157315	0.0239983792763525	GLMN
ENSG00000158042	272.453977608869	-0.178985202569213	0.0574539328655065	-3.11528199450155	0.00183769133117588	0.0239983792763525	MRPL17
ENSG00000157881	857.723274537719	-0.105726714483191	0.0339400269100047	-3.11510402639148	0.00183880048709186	0.0239983792763525	PANK4
ENSG00000171943	288.421377181294	-0.173449983521437	0.0556938000968624	-3.11434994954148	0.00184350697063149	0.0240089839342818	SRGAP2C
ENSG00000166946	3712.92559618414	-0.10465426188295	0.0336049507991015	-3.11425130507103	0.00184412346667812	0.0240089839342818	CCNDBP1
ENSG00000151006	22.8546002818019	0.525036112468389	0.168675393960122	3.1127012668636	0.00185383561091487	0.0241161506349605	PRSS53
ENSG00000086200	244.687272649275	-0.148283880011132	0.0477056768935819	-3.10830680260365	0.00188162623936585	0.0244191606060172	IPO11
ENSG00000184203	2368.33986469532	0.113387392986083	0.0364748441817878	3.10864639807558	0.00187946506789481	0.0244191606060172	PPP1R2
ENSG00000251022	957.372075546409	0.14619062081906	0.0470295268790322	3.10848589217338	0.00188048623646962	0.0244191606060172	THAP9-AS1
ENSG00000125637	7807.65729300017	-0.159054034805247	0.0511936867019672	-3.10690721946257	0.00189055723963927	0.0245155300652905	PSD4
ENSG00000244459	84.6839310386398	-0.220607533615622	0.0710338716580636	-3.10566675398973	0.00189850540992483	0.0245599345603222	RP11-1398P2.1
ENSG00000156711	2528.06498994738	-0.208401196158937	0.0670990495768774	-3.10587403954456	0.00189717511439732	0.0245599345603222	MAPK13
ENSG00000066294	2181.24555384375	0.17708669701538	0.0570127651514637	3.10608854955413	0.00189579935596693	0.0245599345603222	CD84
ENSG00000137992	499.939180483477	-0.142771351551235	0.0459775645569857	-3.10523954295753	0.00190124982289029	0.0245759173535033	DBT
ENSG00000157045	252.56841055829	0.147434900032965	0.0475019955944462	3.10376223541654	0.00191076818729919	0.0246630808943275	NTAN1
ENSG00000130558	98.4457806408256	0.562280268529033	0.181163160471389	3.10372300342946	0.00191102155637264	0.0246630808943275	OLFM1
ENSG00000165548	114.581984928288	0.588877597115876	0.189766147110515	3.10317517682923	0.00191456276979011	0.0246892191857256	TMEM63C
ENSG00000197170	948.268325174796	-0.103773485935688	0.0334499454667949	-3.10235142352332	0.00191989894926021	0.0247384447678806	PSMD12
ENSG00000188315	1016.32370344014	-0.192877152982308	0.062201035241438	-3.10086724816782	0.0019295477514597	0.0248431179668175	C3orf62
ENSG00000226396	25.4248491305658	-0.436734186448474	0.140859161886089	-3.10050252039448	0.00193192569621914	0.0248540867411699	RP5-1056L3.3
ENSG00000148337	1737.22427366057	0.102027323342	0.0329254016759314	3.09874194842649	0.00194344212698678	0.0249825113829784	CIZ1
ENSG00000051825	721.777701496321	0.172164851840385	0.0555698643099162	3.09816937612466	0.00194720105584303	0.0250110911644444	MPHOSPH9
ENSG00000168487	94.9781800133003	0.263733760987875	0.0851496535938684	3.0972969337701	0.00195294146306815	0.025065057217487	BMP1
ENSG00000267632	11.5593942488325	0.630424937987952	0.203574257996407	3.09678121483846	0.00195634204012438	0.025069191823372	RP11-400F19.18
ENSG00000213759	38.9238757551932	0.658299324934531	0.212559440938733	3.0970128733274	0.00195481384516709	0.025069191823372	UGT2B11
ENSG00000100554	909.52465163421	-0.14217153151983	0.0459201415378573	-3.09606039438318	0.00196110413665141	0.0251072981810252	ATP6V1D
ENSG00000203761	149.382436003326	0.189080372502277	0.0610751409824948	3.0958646916013	0.00196239888158931	0.0251072981810252	MSTO2P
ENSG00000112851	7116.10948185128	0.130798397380425	0.0422620958425553	3.09493400108945	0.00196856695906378	0.025139615281066	ERBIN
ENSG00000100890	176.018137986187	0.196914134690181	0.0636277247463925	3.09478510311412	0.00196955541834839	0.025139615281066	KIAA0391
ENSG00000234484	95.7134869361436	0.397276493961021	0.128355366355576	3.09512960183112	0.00196726915548029	0.025139615281066	RP1-55C23.7
ENSG00000124171	57.9846236236398	-0.328739670949625	0.10628907805744	-3.09288289030009	0.00198222341249437	0.0252222443119498	PARD6B
ENSG00000268001	1099.09401802134	-0.151595640913464	0.0490130055294893	-3.09296765778329	0.00198165730579796	0.0252222443119498	CARD8-AS1
ENSG00000183506	234.117561870664	0.241894095477314	0.0781925984540495	3.09356768108256	0.00197765438287468	0.0252222443119498	PI4KAP2
ENSG00000162433	23.0037272988147	0.453428575068565	0.146583598426494	3.09331043811115	0.00197936961276009	0.0252222443119498	AK4
ENSG00000004660	546.517915877938	-0.217378094467665	0.0703045868737806	-3.09194754046317	0.00198847986695011	0.0252230308356826	CAMKK1
ENSG00000237441	3298.33042731778	-0.214111040419341	0.069245326155089	-3.09206487005052	0.00198769406899486	0.0252230308356826	RGL2
ENSG00000152193	303.742843508271	-0.17032697910102	0.0550784530594242	-3.09244304514606	0.00198516323539816	0.0252230308356826	RNF219
ENSG00000074181	11.7836923484298	0.66964953014741	0.216574279636066	3.09200857679267	0.00198807104937801	0.0252230308356826	NOTCH3
ENSG00000099968	1023.5636225125	0.1086775214594	0.0351528614545642	3.09156970336165	0.00199101231429341	0.0252355000489469	BCL2L13
ENSG00000276966	9.83203019595731	-0.746721128813855	0.241715040743729	-3.08926215975754	0.00200654294257469	0.0253666367287503	HIST1H4E
ENSG00000272301	17.8461789103402	-0.503795459869625	0.163069996383929	-3.08944300632411	0.00200532177437533	0.0253666367287503	RP11-111M22.4
ENSG00000265972	100839.435968976	-0.116568475925115	0.0377353264595816	-3.08910739251114	0.00200758855181182	0.0253666367287503	TXNIP
ENSG00000135945	947.368343906149	0.119000779459091	0.0385224817605949	3.08912546701024	0.0020074664145116	0.0253666367287503	REV1
ENSG00000078124	702.942963468113	0.145382183668294	0.0470684852991067	3.08873724625792	0.00201009129237072	0.0253785712239084	ACER3
ENSG00000156304	1231.16387721489	-0.0891482291774337	0.0288770747262181	-3.08716274147028	0.00202076931882987	0.0254913950207233	SCAF4
ENSG00000062194	4819.5673496051	-0.0841692240357839	0.0272660684547023	-3.08695858281204	0.00202215769428222	0.0254913950207233	GPBP1
ENSG00000001084	597.143713775929	0.137072648531434	0.0444122740285363	3.0863686115996	0.00202617469861152	0.0255222794402829	GCLC
ENSG00000243927	524.095841975732	-0.160669577882964	0.0520660735923447	-3.08587851545978	0.00202951723856652	0.0255225171382961	MRPS6
ENSG00000107854	2936.65398811442	0.115385570184665	0.0373919384774815	3.0858408224584	0.00202977452073536	0.0255225171382961	TNKS2
ENSG00000102317	4295.33549440629	0.129207470699552	0.0418733006546411	3.08567676012019	0.00203089471426486	0.0255225171382961	RBM3
ENSG00000170881	1125.08495446704	0.124704981691456	0.040430658739822	3.0844162716703	0.00203952008367422	0.0255907213033056	RNF139
ENSG00000140382	594.153361318636	0.161830577393862	0.0524637794641304	3.08461531073083	0.00203815585264973	0.0255907213033056	HMG20A
ENSG00000198056	147.539947601942	0.189732580737563	0.0615176933209829	3.08419530211558	0.00204103560956554	0.0255907213033056	PRIM1
ENSG00000182584	44.0510814377807	-0.323616469692057	0.104937328465895	-3.08390231029404	0.00204304669552413	0.025596231946155	ACTL10
ENSG00000249667	40.2243921334138	0.403133694124162	0.130760099480279	3.08300235107242	0.00204923535963702	0.0256540325153022	LINC01259
ENSG00000275056	13.8436757485303	0.627598790573385	0.203596377752163	3.082563636458	0.0020522584582702	0.0256721455528777	RP11-127I20.8
ENSG00000122224	1068.11995302907	0.131602163764945	0.0427050655480982	3.0816523069546	0.00205855133737245	0.0257311017895511	LY9
ENSG00000177272	641.683867683709	0.272574204903385	0.0884665035385511	3.08110068783949	0.00206236895280334	0.0257590514833651	KCNA3
ENSG00000085788	1014.47547653863	0.148803818214584	0.0483011889879828	3.08074855572615	0.00206480936475053	0.0257697702097256	DDHD2
ENSG00000234515	13.5358034798333	0.549116789999855	0.178298384311066	3.07976312921515	0.00207165283888296	0.0258353826852119	PPP1R2P1
ENSG00000079332	2840.35342933655	-0.12165928360778	0.0395282571504655	-3.07778010916798	0.00208548738675945	0.0259880130590292	SAR1A
ENSG00000113282	2857.85052942241	0.130643771328799	0.0424553112770647	3.07720677104953	0.00208950304570019	0.0260181468695099	CLINT1
ENSG00000134243	1898.23277102131	0.191561139491967	0.0622694938516758	3.07632401747572	0.00209569971761433	0.0260753715055651	SORT1
ENSG00000168066	9175.09754798088	0.0939802538212909	0.0305596702001494	3.0753032740789	0.002102886048145	0.026144813027586	SF1
ENSG00000198848	415.983204461083	0.486415765596021	0.158218459370866	3.07433005940132	0.00210975880219502	0.0262102529453473	CES1
ENSG00000010327	1497.28973215675	0.313059013240881	0.10184117440914	3.0739925679096	0.00211214694285474	0.0262199216907585	STAB1
ENSG00000159556	86.3223923242626	-0.47280457002067	0.153960310973348	-3.07095099400337	0.00213378169399709	0.0264432885752273	ISL2
ENSG00000253710	170.204727152818	0.2194650866261	0.0714688635811443	3.07077901661224	0.0021350110196122	0.0264432885752273	ALG11
ENSG00000164620	132.631999122269	0.275671785522076	0.0897707579443074	3.07084168424978	0.00213456298477533	0.0264432885752273	RELL2
ENSG00000197226	2095.69234922293	0.151057081933222	0.0491999319649378	3.07027013860248	0.00213865237681031	0.0264682608367093	TBC1D9B
ENSG00000114021	444.538168696592	0.13289677988931	0.0432995285252169	3.06924311686011	0.00214601874293352	0.0265392614017906	NIT2
ENSG00000236861	22.764435570347	0.502090276041901	0.163614634556364	3.06873695866696	0.00214965773983224	0.0265640937850134	AC006378.2
ENSG00000259315	12.2632178622807	-0.503379759046104	0.164144279079036	-3.06669085191647	0.00216442584697131	0.0267263106668853	ACTG1P17
ENSG00000227051	67.2792518237434	0.485841341822868	0.15844386115437	3.06633111742661	0.0021670318825059	0.0267382183866466	C14orf132
ENSG00000273899	97.8982990992588	-0.299642006032028	0.097750984877044	-3.06536048111364	0.00217407785089686	0.0267441132609948	NOL12
ENSG00000181826	563.136931487743	-0.290449064701702	0.0947515769947614	-3.06537446566995	0.00217397618634842	0.0267441132609948	RELL1
ENSG00000029363	6755.74143639925	0.11814895923824	0.0385389890806172	3.06569949178198	0.00217161454769163	0.0267441132609948	BCLAF1
ENSG00000211701	12.1322574484412	0.6439312617212	0.21002694491275	3.06594595273813	0.00216982533126331	0.0267441132609948	TRGV1
ENSG00000178307	530.75752270209	-0.160809151956885	0.0524896923705094	-3.06363296667429	0.00218667006279477	0.0268533151614354	TMEM11
ENSG00000169955	155.076626735458	-0.15481329674522	0.0505283485223107	-3.06388990087144	0.00218479299360507	0.0268533151614354	ZNF747
ENSG00000114796	1906.89626862794	-0.144398128884885	0.0471355640331926	-3.06346453779997	0.00218790134581106	0.0268533151614354	KLHL24
ENSG00000162819	1845.43395727068	-0.117882199768533	0.0385139236265603	-3.06076838370313	0.00220769802493992	0.0270758868465335	BROX
ENSG00000100982	1492.81539304394	-0.121051370668617	0.0395620257927928	-3.0597869609263	0.00221494484383244	0.0271443240568088	PCIF1
ENSG00000162972	105.140019634879	-0.18692722829724	0.0611127990236987	-3.05872470715591	0.00222281308097134	0.0271998171673781	C2orf47
ENSG00000068745	1461.70277969465	-0.118396422297503	0.0387075979225458	-3.05873855914321	0.00222271031307263	0.0271998171673781	IP6K2
ENSG00000128245	1537.1154037892	-0.116768691106163	0.0381803958984916	-3.05834154828071	0.00222565746340345	0.0272141765063453	YWHAH
ENSG00000100321	158.990065845035	0.284460370874158	0.0930192505149599	3.05808065856658	0.00222759608821423	0.0272174474784285	SYNGR1
ENSG00000204177	25.8803143762788	0.483278386955697	0.158068863944205	3.05739141091242	0.00223272521090951	0.0272596667991628	BMS1P1
ENSG00000125962	177.9978979479	0.167977458546563	0.0549514585409172	3.05683348552953	0.00223688500562611	0.0272899970686386	ARMCX5
ENSG00000263843	24.1501618974731	0.478306428964003	0.156504811114429	3.05617715876023	0.00224178755423313	0.0273293367483496	RP11-649A18.12
ENSG00000235111	24.2926191329345	-0.467835866701151	0.153116177294674	-3.05543068647014	0.00224737542620979	0.0273769660184583	RP1-29C18.8
ENSG00000121486	762.659965821125	-0.14059570581015	0.046020257777503	-3.05508296998023	0.00224998268398905	0.0273882421331313	TRMT1L
ENSG00000182487	3514.58940497536	-0.254079978375697	0.0832180240257311	-3.05318446755159	0.00226426702882525	0.0274259417816675	NCF1B
ENSG00000104886	664.979244822122	-0.144677458305717	0.0473823535640555	-3.05340379747346	0.00226261255467729	0.0274259417816675	PLEKHJ1
ENSG00000185236	2569.20552492561	-0.117396993405477	0.0384451281864633	-3.05362470990052	0.00226094726284803	0.0274259417816675	RAB11B
ENSG00000163946	3187.84554803571	0.114086711456767	0.0373660174635781	3.05322106023128	0.00226399092179532	0.0274259417816675	FAM208A
ENSG00000115464	3656.25873503904	0.205595931562954	0.0673399491194015	3.05310494367035	0.00226486717605101	0.0274259417816675	USP34
ENSG00000146373	139.673722500237	0.226449030490666	0.0741489267818082	3.05397583375709	0.00225830271615252	0.0274259417816675	RNF217
ENSG00000261592	9.97728890472113	0.66540451192139	0.217915650799117	3.05349574241818	0.00226191931475228	0.0274259417816675	RP11-178L8.3
ENSG00000104774	2731.83303016629	0.154833169868266	0.0507300774236343	3.05209803989243	0.00227247864665822	0.0274772529458963	MAN2B1
ENSG00000198833	4183.32820588636	0.179887047864707	0.0589362171735038	3.05223267613416	0.00227145953777324	0.0274772529458963	UBE2J1
ENSG00000214655	1471.07612766584	0.161878349615529	0.0530448546332383	3.05172576557679	0.00227529870212689	0.0274909421079679	ZSWIM8
ENSG00000132953	914.399799403663	0.165390720885665	0.0542055117688705	3.05117903121886	0.00227944614069425	0.027510787304486	XPO4
ENSG00000219626	154.39328692991	0.191509808134983	0.0627682036935658	3.05106402391142	0.00228031944870487	0.027510787304486	FAM228B
ENSG00000179115	618.688699601851	-0.114312086901187	0.0374713046215155	-3.05065671067002	0.00228341484746754	0.0275277406518903	FARSA
ENSG00000074319	1097.1236693313	-0.0996622080550146	0.0326808921950224	-3.04955591359878	0.00229179968161591	0.0276083886201763	TSG101
ENSG00000174780	2391.54663529151	0.137015642855791	0.0449683851005595	3.04693269614626	0.00231189468572382	0.0278093269914209	SRP72
ENSG00000178425	586.72766751502	0.138470779425734	0.045443012817029	3.04713025923855	0.00231037566443926	0.0278093269914209	NT5DC1
ENSG00000115486	529.087800242199	0.116958380883972	0.0384098547105304	3.04500971861023	0.00232672791207938	0.0279670977889571	GGCX
ENSG00000158552	1086.28926369807	-0.136574226040185	0.0448598896869634	-3.04446192340671	0.00233096934914252	0.0279767854012412	ZFAND2B
ENSG00000112855	997.219523239983	-0.123418062023604	0.0405377991159981	-3.04451807239081	0.0023305342765736	0.0279767854012412	HARS2
ENSG00000103365	2290.49444653649	0.110009976629128	0.0361513817141405	3.04303657046938	0.00234203869158705	0.0280682738556868	GGA2
ENSG00000092529	27.0462510915801	0.404647109971422	0.132968950341644	3.04316991998314	0.00234100105711412	0.0280682738556868	CAPN3
ENSG00000106615	831.492579352776	-0.104984019931088	0.0345031252565613	-3.04273943738252	0.00234435229243121	0.0280753424903141	RHEB
ENSG00000276791	38.0530380265467	-0.407518169146389	0.133948973329398	-3.04233887738915	0.00234747453024243	0.0280920776444221	CTD-2270P14.5
ENSG00000112367	877.648568943353	0.110807000088848	0.0364376245431567	3.04100504569415	0.00235789879409045	0.0281799145623598	FIG4
ENSG00000153989	958.171683518474	0.119698648167251	0.0393621637431738	3.04095702025551	0.00235827491548452	0.0281799145623598	NUS1
ENSG00000139133	79.4545028488639	0.293147046252678	0.0964149236190414	3.04047376950661	0.00236206265474174	0.028204482740307	ALG10
ENSG00000101138	697.780143658633	-0.105959865804864	0.0348607967924696	-3.03951359562019	0.00236960507084419	0.0282738152299189	CSTF1
ENSG00000198408	9912.53798392212	-0.129941738469904	0.0427575885052988	-3.03903337424655	0.00237338560103178	0.0282859889666654	MGEA5
ENSG00000138744	1835.12700078291	0.223238383281617	0.0734592236577889	3.03894286062124	0.00237409878537678	0.0282859889666654	NAAA
ENSG00000204564	301.164378641007	-0.159464895807234	0.0524842871901686	-3.03833593527598	0.00237888600540069	0.0283223072879832	C6orf136
ENSG00000138061	1184.00200185301	0.309337608616441	0.101820734371607	3.0380610641392	0.00238105700130807	0.0283274473194336	CYP1B1
ENSG00000129055	827.909981982876	-0.140192237103431	0.0461625656990048	-3.0369247241917	0.00239005134007017	0.0283722785537338	ANAPC13
ENSG00000088205	2304.45126713417	0.103220663020558	0.0339858221293493	3.03716834118952	0.00238812045176686	0.0283722785537338	DDX18
ENSG00000124134	19.3117487425576	0.620389050531572	0.204281681012005	3.03692943712909	0.00239001397216282	0.0283722785537338	KCNS1
ENSG00000115904	1872.27891468761	0.144559317255394	0.0476115345769596	3.03622469932633	0.00239560763597191	0.0284175248121446	SOS1
ENSG00000138246	2566.20911327117	0.123296820689545	0.0406129073810099	3.03590234338154	0.00239817024062467	0.0284272188566623	DNAJC13
ENSG00000198920	467.408678472874	-0.153224407274857	0.0504746167626657	-3.03567252417836	0.00239999874604055	0.0284282033285545	KIAA0753
ENSG00000153187	16435.5038093566	0.0808785573106105	0.0266516477086036	3.03465505003285	0.00240810939513711	0.0285035448536323	HNRNPU
ENSG00000161328	57.9317806182504	0.328346939935871	0.108207699689176	3.03441382525495	0.00241003595937296	0.0285056322950672	LRRC56
ENSG00000155846	251.79153818656	0.206956391455846	0.0682288767964034	3.03326686841715	0.00241921555319705	0.0285934424636578	PPARGC1B
ENSG00000141446	1257.20943274905	-0.116067150996249	0.0382713053658526	-3.03274607141594	0.00242339427307186	0.0286220612947943	ESCO1
ENSG00000126882	3734.53893616401	-0.0968316370143115	0.0319480146563408	-3.03091250132168	0.00243815891997713	0.0287755756012083	FAM78A
ENSG00000257433	42.0877540303377	-0.349254067498225	0.115281027176186	-3.02958844185568	0.00244887191972944	0.0288810839657012	RP1-197B17.3
ENSG00000066933	632.896990337399	0.197317274269183	0.0651594668215995	3.02822113031432	0.00245998006774835	0.028991096500302	MYO9A
ENSG00000136286	5768.10511099622	0.125029444479187	0.0412956042696951	3.02766957138197	0.00246447401267274	0.0290230572989161	MYO1G
ENSG00000245148	23.8636913303258	0.550465415140029	0.181833974453045	3.02729683380581	0.00246751522444866	0.0290378760553435	ARAP1-AS2
ENSG00000213903	1903.73999006555	-0.185262391563445	0.0612221910226955	-3.02606601411515	0.00247758204158564	0.0290723189562719	LTB4R
ENSG00000163686	180.452300492896	-0.182972706480774	0.0604623412242027	-3.026225957779	0.00247627174888979	0.0290723189562719	ABHD6
ENSG00000215193	1078.06272665092	0.0965197516038622	0.0318940661612831	3.02626046850776	0.00247598911279431	0.0290723189562719	PEX26
ENSG00000178149	195.885344006758	0.172983079736103	0.0571543347573062	3.02659597860143	0.00247324288892157	0.0290723189562719	DALRD3
ENSG00000247796	32.2055157822435	-0.357760051545867	0.118256752155169	-3.02528223569371	0.00248401209763927	0.0291219354059923	CTD-2366F13.1
ENSG00000205890	182.19511729345	-0.351524053221975	0.116218101059719	-3.02469279756466	0.00248885785614276	0.0291219354059923	RP11-473M20.5
ENSG00000125686	1584.70395873213	0.121772491166359	0.0402542513493174	3.02508398702151	0.00248564093159618	0.0291219354059923	MED1
ENSG00000112992	1197.44932283707	0.139924027638686	0.0462607695898739	3.02468006648368	0.0024889626134427	0.0291219354059923	NNT
ENSG00000189266	3704.56723643174	-0.10322971495068	0.0341402512254731	-3.02369523495648	0.00249707850525193	0.0291749767683201	PNRC2
ENSG00000143382	968.444386638915	0.259893318222281	0.0859512336887282	3.02372993462179	0.00249679213800403	0.0291749767683201	ADAMTSL4
ENSG00000178502	137.68811771309	0.273445056820891	0.0904427003984444	3.02340659463098	0.0024994617430274	0.029181887748163	KLHL11
ENSG00000169826	2972.12609334949	0.115475156984119	0.0382019391789591	3.02275642194941	0.00250483769612834	0.0292237045536119	CSGALNACT2
ENSG00000165792	492.317377154219	0.17245819148845	0.0570691694777328	3.02191521388339	0.0025118089215396	0.0292840600609273	METTL17
ENSG00000229358	17.0328939891736	0.649348254318108	0.214966789309452	3.0206910397836	0.00252198555804334	0.0293816729498225	DPY19L1P1
ENSG00000111452	115.3055728204	0.337825667563627	0.111865113825567	3.01993763748728	0.00252826737228385	0.0294338032111416	ADGRD1
ENSG00000258317	11.5206208187151	0.575890153797137	0.190774119409945	3.01870167493546	0.00253860374400831	0.0295330279847595	RP11-603J24.5
ENSG00000152217	291.050885156266	0.252032307473648	0.0835199358170094	3.01763052148227	0.00254759306285133	0.0295953268292865	SETBP1
ENSG00000239388	37.9710063154535	0.339191731390648	0.112396838937788	3.01780490088686	0.00254612765737917	0.0295953268292865	ASB14
ENSG00000197114	199.80290380537	0.189834264980716	0.0629463023654634	3.01581280944109	0.00256291428334975	0.0297520918980166	ZGPAT
ENSG00000261799	248.714507373897	-0.18492238238999	0.0613223416978271	-3.01557926964394	0.00256488885179218	0.0297538067871362	RP11-283I3.6
ENSG00000026297	5398.28204205901	-0.252347825810403	0.0836873974165226	-3.01536233173122	0.0025667242983074	0.0297539065099876	RNASET2
ENSG00000115368	1218.85060825919	-0.132382705005604	0.0439090067230612	-3.01493280958406	0.00257036189996132	0.0297748821228093	WDR75
ENSG00000139194	53.2949824175103	0.392039567284399	0.130065603408766	3.01416790457896	0.00257685151729553	0.0298288419773932	RBP5
ENSG00000135951	123.312360843757	0.299790966444703	0.0995026453636459	3.012894434606	0.00258768915289576	0.0299330207622254	TSGA10
ENSG00000163191	16584.8548050279	-0.197694201731443	0.0656298754384249	-3.01225928604607	0.00259311003221099	0.0299744379663736	S100A11
ENSG00000131781	187.863170911219	0.177663369719769	0.0589907768468411	3.01171435970474	0.00259776915444527	0.0300069973180498	FMO5
ENSG00000100142	466.810575686628	-0.133929672149873	0.0444844985618707	-3.01070432352067	0.00260642521377084	0.0300856466737673	POLR2F
ENSG00000143486	869.390549780083	0.0858097265209082	0.0285055330973872	3.01028316950765	0.0026100423079895	0.0301060616644652	EIF2D
ENSG00000234222	12.9073053256718	0.478901127673041	0.159125228532817	3.00958642503552	0.00261603639689387	0.0301325210722847	RP11-315I20.1
ENSG00000261208	25.870257349816	0.578288030955743	0.192145707978349	3.00963283041901	0.0026156367807894	0.0301325210722847	RP11-452D12.1
ENSG00000143390	1137.11780515956	0.123976703874887	0.0411990044066253	3.00921601530133	0.00261922815094211	0.0301479638829641	RFX5
ENSG00000109270	1059.35805340016	-0.11367174960578	0.0377816133348486	-3.00865261094958	0.00262408973091816	0.0301612910708991	LAMTOR3
ENSG00000109920	3556.54118400013	0.130521195079139	0.0433816589917197	3.00867228484856	0.00262391982720278	0.0301612910708991	FNBP4
ENSG00000260231	221.660505973552	-0.175566213639843	0.0583959720446234	-3.00647814382958	0.00264293052456672	0.0303564241562893	JHDM1D-AS1
ENSG00000129003	5156.49527989716	0.198087759829136	0.0658974540310892	3.00600019745348	0.00264708825888388	0.0303827529756461	VPS13C
ENSG00000096433	961.270601651492	0.212724729130702	0.0707718999482855	3.00577954366273	0.00264900977904274	0.0303833959656825	ITPR3
ENSG00000078177	622.776215934098	0.196277278022749	0.0653732234542199	3.00241089014372	0.0026785037774765	0.0307000640561293	N4BP2
ENSG00000115649	1632.44005250513	-0.107340388214678	0.0357637435383324	-3.0013745093443	0.00268763791743818	0.030783093362388	CNPPD1
ENSG00000248019	454.628157018424	-0.23310142299691	0.0776779132603853	-3.0008713315396	0.00269208293107172	0.0308123364008188	FAM13A-AS1
ENSG00000224152	375.964263193407	-0.302129776291179	0.100810413566086	-2.99700959061257	0.00272642135807984	0.031161561164243	AC009506.1
ENSG00000103490	1456.89184734027	-0.224121936171867	0.0747805981652315	-2.99705995499873	0.00272597095653173	0.031161561164243	PYCARD
ENSG00000181004	66.6602527918765	-0.247158707745888	0.0824880648545311	-2.99629659371639	0.0027328048866138	0.031211618323084	BBS12
ENSG00000135679	2123.00199206948	-0.162030296186877	0.0540824912751729	-2.99598432628526	0.00273560494375193	0.031211618323084	MDM2
ENSG00000111602	283.058518691912	0.137438632931586	0.0458758959831254	2.99587899018125	0.00273655006848185	0.031211618323084	TIMELESS
ENSG00000112773	976.422049577209	-0.197916732289405	0.0660698216782309	-2.99556934258558	0.00273933009898879	0.0312207607447582	FAM46A
ENSG00000182149	4312.05999632433	-0.0645407842622949	0.0215469001922617	-2.99536284506827	0.00274118547706786	0.0312207607447582	IST1
ENSG00000272112	28.7364328686296	-0.391813639393861	0.130825598254166	-2.99493099685775	0.0027450693402826	0.0312392883937488	CTB-113P19.5
ENSG00000254470	3147.99297367854	0.260555647549146	0.0870039773447982	2.99475559050087	0.00274664830722959	0.0312392883937488	AP5B1
ENSG00000259562	27.8760412179499	0.362508277214078	0.121078973563382	2.99398208083018	0.00275362116155229	0.0312967396079568	RP11-762H8.2
ENSG00000135637	127.968010142356	0.215269400945065	0.0719117924431034	2.9935201672992	0.00275779281944463	0.0313222954325626	CCDC142
ENSG00000138964	3352.83464627529	-0.143663130684601	0.048005487869758	-2.99263973890586	0.00276576018347159	0.0313690362870485	PARVG
ENSG00000169251	650.675469202113	0.132774710238726	0.044366462410105	2.99268192743005	0.00276537792280804	0.0313690362870485	NMD3
ENSG00000189195	126.224368064012	0.243471604795032	0.0813635168416098	2.9923928346042	0.00276799829540416	0.0313725735819399	BTBD8
ENSG00000108091	763.631095405855	0.172084074251229	0.0575213982538475	2.99165318429509	0.00277471290375224	0.031426807415447	CCDC6
ENSG00000177946	238.518564554296	-0.184085306394371	0.061541191434808	-2.99125353446198	0.00277834714678809	0.0314461014452659	CENPBD1
ENSG00000143443	91.4819653139039	-0.269916298348322	0.0902651510771376	-2.99026030674518	0.00278739796763264	0.031526632429745	C1orf56
ENSG00000007545	368.004396942953	-0.136106805140945	0.0455447869887165	-2.9884167681949	0.00280426868559718	0.0316954365595568	CRAMP1
ENSG00000132467	1043.41882726025	-0.11480260267729	0.0384516771642579	-2.9856331672316	0.00282991892244082	0.0319631688556128	UTP3
ENSG00000279089	47.5382068543846	0.314632264741097	0.105395940349155	2.98524083279475	0.00283355136858005	0.0319820174220813	RP11-481C4.2
ENSG00000116704	545.892365315479	0.152340973351671	0.0510611066181204	2.98350316790058	0.00284969085754838	0.0321419078925834	SLC35D1
ENSG00000163602	2922.39834253233	-0.131871682793956	0.044203958025082	-2.98325509039551	0.00285200184377478	0.0321457121311833	RYBP
ENSG00000269918	121.376429719381	-0.321025721897847	0.107621841043293	-2.98290494555571	0.00285526655850803	0.0321602534152284	AF131215.9
ENSG00000179941	376.304406555954	-0.194795726078938	0.0653161635084151	-2.98235100801414	0.00286043838474718	0.0321962404784916	BBS10
ENSG00000261220	45.0258606322352	-0.327514263437044	0.109832896978395	-2.98193230304641	0.00286435328877743	0.0322180400651367	RP11-629O1.2
ENSG00000186416	268.592497008112	-0.168349102150515	0.0565128650161326	-2.9789518210138	0.00289236252847444	0.0324658225370525	NKRF
ENSG00000198863	801.030594460956	-0.147420129243104	0.0494866265090806	-2.97898926725289	0.00289200908009221	0.0324658225370525	RUNDC1
ENSG00000127334	2645.70402935729	0.131347135936484	0.0440906695805272	2.97902338944053	0.00289168704117117	0.0324658225370525	DYRK2
ENSG00000262246	663.211263943903	-0.212146286007883	0.071228028420132	-2.97841019488223	0.00289747925272403	0.0325008571550388	CORO7
ENSG00000258515	29.0395134586479	0.441312868286271	0.148197140461752	2.97787708258897	0.00290252361408654	0.0325350324175	RP11-203M5.7
ENSG00000001629	1161.39459036392	0.131145143483894	0.0440674652911574	2.97600832308842	0.00292026936291177	0.0327114354289848	ANKIB1
ENSG00000145416	2299.46134724478	0.192979006920995	0.0648506600464367	2.97574468452305	0.00292278083050729	0.0327170662449981	MARCH1
ENSG00000118596	679.329204946134	0.245076295601604	0.0823727942576402	2.97520920360029	0.00292788798543232	0.0327517250128683	SLC16A7
ENSG00000274487	42.2198857717514	0.386493832078116	0.129941630556941	2.97436495464593	0.00293595656310589	0.0328194403179861	CH17-431G21.1
ENSG00000086717	14.9055846901305	-0.502834744365701	0.169069181996645	-2.97413602187819	0.00293814799256252	0.0328214103942838	PPEF1
ENSG00000135829	4023.27966593021	0.0805275443467925	0.0270864860990933	2.97297863045764	0.00294924983939158	0.0329228458767448	DHX9
ENSG00000134058	431.068033862455	-0.128446403874131	0.0432093421351023	-2.97265354035057	0.00295237502394794	0.0329351589144111	CDK7
ENSG00000161920	320.00721870644	-0.178550040067534	0.0600892848339291	-2.97141230022956	0.0029643352370585	0.0330459466159971	MED11
ENSG00000249684	27.3255264330626	-0.522475738249997	0.175886839197939	-2.9705220733543	0.00297294039891923	0.0331192067559491	RP11-423H2.3
ENSG00000142552	890.340268901399	-0.278385791249658	0.093735758132228	-2.96989960711636	0.00297897085079903	0.03316196535176	RCN3
ENSG00000270091	95.5854609596293	-0.276982079706437	0.0932691987686009	-2.96970579101494	0.00298085081813573	0.03316196535176	RP11-78O7.2
ENSG00000104904	17806.2308991224	-0.129333669515968	0.0435775993484209	-2.96789340050359	0.00299848300752733	0.033290835781288	OAZ1
ENSG00000121390	1321.75805628464	0.0940537520663261	0.0316916962779867	2.96777273268444	0.00299966031917021	0.033290835781288	PSPC1
ENSG00000108654	37044.8444064097	0.15045586405726	0.0506982220691395	2.9676753526401	0.00300061072799968	0.033290835781288	DDX5
ENSG00000183891	460.43581753507	0.190940613511806	0.0643274114627208	2.96826203899811	0.00299488894749922	0.033290835781288	TTC32
ENSG00000203772	46.9185169644554	-0.332923124668923	0.11221857762465	-2.96673805457139	0.00300977261776201	0.0333697526381823	SPRN
ENSG00000196312	869.410849719983	0.131359942667984	0.0442851621181827	2.96622923762653	0.00301475687521107	0.0333935618248733	MFSD14C
ENSG00000242258	75.0908352786333	0.381235633984078	0.128530929582468	2.96610034038127	0.0030160207186338	0.0333935618248733	LINC00996
ENSG00000116641	214.169030910328	0.193006011729252	0.0650822574079787	2.96557033231596	0.00302122255307964	0.0334284318763642	DOCK7
ENSG00000255274	54.4199859186507	0.351989521485703	0.118741720061043	2.96432897640991	0.00303343805085393	0.0335408048433523	TMPRSS4-AS1
ENSG00000131791	652.056968901303	0.152217600631534	0.0513657226395256	2.96340814086793	0.00304252856948452	0.033618495801353	PRKAB2
ENSG00000264204	289.361587166236	-0.360613224593258	0.121769402417929	-2.96144365852749	0.00306200510320087	0.0338107641463272	AGAP7P
ENSG00000275371	34.0811056799266	-0.435094308549512	0.146934227318047	-2.96115014514437	0.00306492483639857	0.0338200750748127	RP11-455F5.6
ENSG00000196646	546.800072903104	-0.119965075019293	0.0405268165463278	-2.96014059930308	0.00307498671929397	0.0338893933309208	ZNF136
ENSG00000173473	2482.25008996735	0.121392604098428	0.0410095965452131	2.960102374199	0.00307536829023767	0.0338893933309208	SMARCC1
ENSG00000101577	4542.01282896688	-0.161748119443089	0.0546660586591961	-2.95883997146152	0.00308799414238489	0.0339825409439343	LPIN2
ENSG00000188690	452.452490039805	0.124976377176215	0.0422367219317802	2.95895068225403	0.00308688498656655	0.0339825409439343	UROS
ENSG00000157212	324.085850040831	0.143081652189284	0.0483741324550592	2.95781329664591	0.00309829720585687	0.0340729011423301	PAXIP1
ENSG00000073150	1204.70632891191	-0.254917908665668	0.0862500546226928	-2.95556808376325	0.00312093805990604	0.0342756022803032	PANX2
ENSG00000243364	111.342368188844	-0.225636568734185	0.0763380660670631	-2.95575432230577	0.00311905429869258	0.0342756022803032	EFNA4
ENSG00000143819	405.22222392087	0.134300404027957	0.0454489718092263	2.9549712277692	0.00312698211561313	0.0343188394319347	EPHX1
ENSG00000187051	892.945280120968	-0.130515236252087	0.044177801081891	-2.95431716961545	0.0031336176810357	0.0343453776386463	RPS19BP1
ENSG00000172269	326.272489237881	0.110303188217054	0.0373336722716472	2.95452286114438	0.0031315295123363	0.0343453776386463	DPAGT1
ENSG00000164284	545.984514632665	-0.135951982311517	0.0460246346120239	-2.95389596153361	0.00313789772324618	0.0343460619748055	GRPEL2
ENSG00000207034	10.7178391205498	0.710916694891457	0.240655933732974	2.95407922781689	0.00313603483612774	0.0343460619748055	Y_RNA
ENSG00000159352	2911.82934516638	-0.110078988601066	0.0372684637963972	-2.95367657766746	0.00314012906928567	0.0343474023851281	PSMD4
ENSG00000197774	270.720037301236	0.201816172953159	0.0683477363445089	2.95278503352179	0.00314921182611432	0.0344188630258642	EME2
ENSG00000257337	13.9079988397814	0.490225580879263	0.166030666520626	2.95262068840976	0.00315088873159965	0.0344188630258642	RP11-983P16.4
ENSG00000102931	27.1142999337212	0.400260974534769	0.135580664495864	2.95219805879457	0.00315520479756585	0.0344429092077446	ARL2BP
ENSG00000166024	810.328838900516	-0.104815737458601	0.0355083064790943	-2.95186529158499	0.00315860694337365	0.0344569533065818	R3HCC1L
ENSG00000196169	34.6645282945586	-0.550841750579914	0.186684820105234	-2.95065099706235	0.00317105003215925	0.0345695394068123	KIF19
ENSG00000136636	165.079031162405	0.196172159502525	0.0665453572944056	2.94794659580281	0.00319892321725516	0.0348500752103243	KCTD3
ENSG00000166886	248.576292865151	-0.174654588428217	0.0592584093858885	-2.94733844931398	0.00320522181062585	0.0348953526936252	NAB2
ENSG00000169738	624.654964929065	-0.20421335265673	0.06929960787492	-2.94681829982816	0.00321061798095704	0.0349149066076768	DCXR
ENSG00000181722	71.4429173980315	0.386018070177169	0.130997809445852	2.94675210074204	0.00321130534157916	0.0349149066076768	ZBTB20
ENSG00000267534	85.432833756828	-0.257659813412452	0.0874648280548407	-2.94586771783165	0.0032205009680027	0.0349915271953702	S1PR2
ENSG00000196981	365.684987037767	-0.18206551966809	0.0618205073108192	-2.94506673574687	0.0032288501105217	0.0350588545000447	WDR5B
ENSG00000100401	1235.18921114368	-0.114000751930678	0.0387198671229869	-2.94424439961466	0.00323744235411721	0.0351287299277195	RANGAP1
ENSG00000176407	2087.74649150108	-0.0832515542370078	0.0282816048773896	-2.94366442774134	0.00324351475808802	0.0351711883255523	KCMF1
ENSG00000214114	552.736471636271	-0.128763983035572	0.0437591679914436	-2.94256012958815	0.0032551056470006	0.0352499372823795	MYCBP
ENSG00000196912	103.362712509753	0.416357597642874	0.141492871465078	2.94260476398372	0.00325463642642809	0.0352499372823795	ANKRD36B
ENSG00000252965	35.0834134806134	-0.304288332885372	0.103475921623647	-2.94066801349305	0.00327505335450769	0.0353718793003095	Y_RNA
ENSG00000244041	116.811135550233	-0.238206269748673	0.0810000883077588	-2.9408149389123	0.00327350040886002	0.0353718793003095	LINC01011
ENSG00000186106	207.278998168454	-0.172701400636722	0.0587260514480819	-2.94079708031116	0.0032736891316431	0.0353718793003095	ANKRD46
ENSG00000136813	1917.47793470263	0.0924510896839906	0.0314342425908548	2.94109487183532	0.00327054348110583	0.0353718793003095	KIAA0368
ENSG00000136895	19.6279920727186	0.410223894311903	0.139528666180421	2.94006891588466	0.00328139253781781	0.0354168590214968	GARNL3
ENSG00000187098	86.7481592397386	0.290962256740308	0.0990093413267755	2.93873540457159	0.00329554286167114	0.0355460308530052	MITF
ENSG00000225342	289.806445505931	-0.271589045815922	0.0924447812678292	-2.93785157032368	0.00330495211996386	0.0356239279800473	AC079630.4
ENSG00000221184	23.6879621393769	0.424473454888625	0.144501258010866	2.93750698597175	0.00330862717397026	0.0356399542211995	MIR1254-1
ENSG00000116489	9207.3029013186	-0.11641206469531	0.0396351027969367	-2.93709506171148	0.00331302530439477	0.0356624247009283	CAPZA1
ENSG00000120756	33.2527634198959	0.345864811030671	0.117765201265748	2.93690162555062	0.00331509246621265	0.0356624247009283	PLS1
ENSG00000112893	1942.22841292275	0.144657277860113	0.0492622865982045	2.93647103797625	0.00331969817294526	0.0356883987740987	MAN2A1
ENSG00000270277	24.5969861943284	-0.399510106317987	0.136127102516144	-2.93483148420504	0.00333728877403347	0.0358538405426669	RP11-65L3.2
ENSG00000135900	726.334462411256	-0.160999423925011	0.0548696359510549	-2.93421709720522	0.00334390230292576	0.035877560479415	MRPL44
ENSG00000050628	14.7131904451511	0.596867787007659	0.20340609431035	2.93436531010215	0.00334230578341616	0.035877560479415	PTGER3
ENSG00000002919	1197.12893729875	-0.145888789467478	0.0497564523950367	-2.93205770196814	0.00336724177717402	0.0360567171760902	SNX11
ENSG00000224870	467.603298719463	-0.10963314266783	0.0373869184285825	-2.9323931277528	0.00336360667774091	0.0360567171760902	RP4-758J18.2
ENSG00000111684	224.607770214123	0.17777581518938	0.0606302816790393	2.93212913194892	0.00336646737162212	0.0360567171760902	LPCAT3
ENSG00000183044	931.770822117597	-0.198611381177263	0.0677727159157822	-2.93055071636892	0.00338361756390665	0.0362081938105778	ABAT
ENSG00000134313	4176.98928719561	0.100362922050311	0.0342494978731845	2.93034725419697	0.00338583405007122	0.0362081938105778	KIDINS220
ENSG00000137996	714.579421839641	-0.0828039002743312	0.0282609973358478	-2.92997091681892	0.00338993729695036	0.0362282865849281	RTCA
ENSG00000143811	939.462087666795	-0.122274068148837	0.0417369343819662	-2.92963702196752	0.00339358157820845	0.0362434512552662	PYCR2
ENSG00000123975	74.3038155103899	-0.280545366460548	0.0957679017028026	-2.92943002271437	0.0033958426535544	0.0362438330920318	CKS2
ENSG00000122547	921.046453091879	-0.171209850446736	0.0584537846564575	-2.92897802003693	0.00340078469609657	0.0362728096564014	EEPD1
ENSG00000153944	1178.92105949056	0.138737168912045	0.0473749340097007	2.9284931327532	0.00340609356681867	0.0363056583264239	MSI2
ENSG00000151665	135.881113720961	0.212340040209689	0.072541336167543	2.92715920918887	0.00342073720652969	0.0364140829299014	PIGF
ENSG00000232713	24.6425448048554	0.392338090368133	0.134027844837056	2.92728791427719	0.00341932180478044	0.0364140829299014	AC010733.5
ENSG00000104343	1349.69542161111	-0.13824807473735	0.0472355471530711	-2.92678042427124	0.00342490589338289	0.0364346455163469	UBE2W
ENSG00000130703	3575.12701492345	-0.144547979506762	0.0494099773029679	-2.92548160102231	0.00343923512711892	0.0365632000753171	OSBPL2
ENSG00000186496	84.6623782786846	-0.287985987051345	0.0984651910312265	-2.92474918329276	0.00344733954886661	0.0365840510087936	ZNF396
ENSG00000110876	17486.5902628247	-0.148273025616731	0.0506905351189759	-2.92506333319857	0.00344386125937452	0.0365840510087936	SELPLG
ENSG00000257800	36.5964039840428	0.423975168293553	0.144963870195506	2.9246954273624	0.00344793505854351	0.0365840510087936	FNBP1P1
ENSG00000159247	24.4041777934918	-0.656704287905341	0.224585618659986	-2.92407097045499	0.00345485967418062	0.0366336585373566	TUBBP5
ENSG00000129493	444.878036356825	-0.172273825829922	0.0589354512963545	-2.92309335112495	0.00346572593861356	0.0366860874140949	HEATR5A
ENSG00000250539	22.7494763834659	0.494800765431632	0.16927734183702	2.92301828503443	0.00346656158471738	0.0366860874140949	KRT8P33
ENSG00000211900	16.2135961754855	0.576108871236356	0.19707234490573	2.92333696801518	0.0034630152245269	0.0366860874140949	IGHJ6
ENSG00000113851	1562.08450483872	0.0975798792208924	0.0333941906692727	2.92206151025781	0.00347722860994811	0.036775079461185	CRBN
ENSG00000120318	2926.91072142613	-0.206361370974324	0.0706530212884394	-2.9207720662342	0.00349165180328136	0.0368220042471808	ARAP3
ENSG00000119912	597.745953148016	0.150416240338525	0.0514932352360624	2.9210873942755	0.00348811965264133	0.0368220042471808	IDE
ENSG00000058063	4289.64166275554	0.158819005890283	0.0543762065661151	2.92074449322201	0.0034919608173908	0.0368220042471808	ATP11B
ENSG00000165819	993.912639329502	0.180594031117536	0.0618334115161846	2.92065449227666	0.00349296964216212	0.0368220042471808	METTL3
ENSG00000127337	271.178586253972	0.183470929876716	0.0628167237277769	2.92073382674027	0.00349208036462797	0.0368220042471808	YEATS4
ENSG00000010322	2279.91127292673	0.106453171126011	0.0364534829218199	2.92024691726485	0.00349754149031869	0.0368463507456795	NISCH
ENSG00000129204	30.3520170339703	-0.496502048036126	0.170057817542532	-2.91960731480015	0.00350472701418963	0.0368743468217743	USP6
ENSG00000149257	130.618910814463	-0.220028701782492	0.0753599038713425	-2.91970518112834	0.00350362667894989	0.0368743468217743	SERPINH1
ENSG00000166348	91.0590474996327	0.21563061089687	0.073864778473247	2.91926159333124	0.00350861656378912	0.0368846976364804	USP54
ENSG00000072954	73.0577558309505	0.28453135221978	0.0974717062550376	2.91911738443662	0.00351024015082855	0.0368846976364804	TMEM38A
ENSG00000248367	24.9286071278296	-0.448223704282202	0.153603874279841	-2.91804947227837	0.00352228461509939	0.0369429732439366	CTB-129O4.1
ENSG00000137413	1490.36651981005	-0.106281844687661	0.0364176678102995	-2.91841435979058	0.00351816500282193	0.0369429732439366	TAF8
ENSG00000091409	2133.35031277203	0.16983020763709	0.0582004476197552	2.91802236207276	0.00352259086681608	0.0369429732439366	ITGA6
ENSG00000254676	34.7965840738775	0.307441959508336	0.105413040543793	2.9165457890441	0.00353930768520005	0.0370944042914113	RP11-727A23.4
ENSG00000211785	84.9189494722468	0.258466206225398	0.0886428466919263	2.91581572423643	0.00354759965057747	0.0371573990411288	TRAV12-1
ENSG00000188428	328.694955853496	-0.147380122446906	0.0505644878648473	-2.91469623584116	0.00356034896366093	0.0372430337643838	BLOC1S5
ENSG00000093183	757.279821232861	0.0899209533958697	0.0308502312806316	2.91475783691527	0.00355964633650726	0.0372430337643838	SEC22C
ENSG00000133789	1649.54525574475	0.1784296784857	0.0612432926987311	2.91345665170934	0.00357451460759416	0.0373672140012106	SWAP70
ENSG00000131370	516.556153495483	0.189243987015169	0.0649833748715016	2.9121908086396	0.00358903322439194	0.0374949224667553	SH3BP5
ENSG00000180089	106.675722377841	-0.283345470340469	0.0973134646137845	-2.91167796219161	0.00359493058133949	0.0375324579347925	TMEM86B
ENSG00000151465	1400.29248726818	-0.126413023397372	0.0434226929049498	-2.91122026158267	0.00360020124362301	0.0375453586347853	CDC123
ENSG00000196459	688.388382791415	-0.123144973954766	0.0423008481711106	-2.91117032586757	0.00360077670458247	0.0375453586347853	TRAPPC2
ENSG00000174529	79.8470114081945	-0.289308345944355	0.0993881921761781	-2.91089252767089	0.00360397958849439	0.0375547124490135	TMEM81
ENSG00000069667	2519.87473912576	0.244708176677772	0.0840918207100314	2.91001163503861	0.00361415301400308	0.0376366433114246	RORA
ENSG00000188404	41307.2515169089	-0.17752569128549	0.0610174880586383	-2.90942313316613	0.00362096416577871	0.0376834781904395	SELL
ENSG00000184076	773.639975158371	-0.138202548479482	0.0475213945766333	-2.90821743997044	0.00363495498460218	0.0378049245429219	UQCR10
ENSG00000223534	23.5441320398455	0.763337783432779	0.262610029750794	2.90673507084689	0.00365222371005079	0.0379602856193984	HLA-DQB1-AS1
ENSG00000271533	74.9768267710639	-0.293879576472123	0.101133595762668	-2.90585511427651	0.00366250993749883	0.0379944581860149	RP3-368A4.6
ENSG00000161654	203.487378676283	0.159292570020271	0.0548153937014285	2.9059824123113	0.00366102026277385	0.0379944581860149	LSM12
ENSG00000236675	68.4295652848829	0.260757318138684	0.0897336766624519	2.90590253110397	0.00366195498904346	0.0379944581860149	MTX1P1
ENSG00000100246	211.620475296559	-0.147571518582456	0.0507950322901256	-2.90523525488817	0.00366977157254164	0.0379971834723367	DNAL4
ENSG00000041988	241.883534212372	-0.147280828557695	0.0506945182300141	-2.9052614306234	0.00366946466000648	0.0379971834723367	THAP3
ENSG00000132254	492.450680791412	0.0974599057223193	0.0335436904769772	2.90546163336474	0.00366711803904712	0.0379971834723367	ARFIP2
ENSG00000246451	131.738433572773	0.296261127819343	0.101985105638946	2.90494505019374	0.00367317580940846	0.0380082683658421	RP11-894P9.1
ENSG00000196159	22.129974022621	0.537710167780838	0.185123984372395	2.90459482926415	0.00367728788810702	0.0380266589419676	FAT4
ENSG00000099860	1872.10733972329	-0.214004606226447	0.073700382589834	-2.90371092667796	0.00368768474750931	0.0380616739433993	GADD45B
ENSG00000143977	603.296914976963	-0.138588777197992	0.0477252517221616	-2.9038878203263	0.00368560190833343	0.0380616739433993	SNRPG
ENSG00000118412	1421.44007178992	0.144155303562121	0.0496449913249009	2.90372300840377	0.00368754245685034	0.0380616739433993	CASP8AP2
ENSG00000130816	1941.78164402563	0.109304902944574	0.0376497069339663	2.90320727160727	0.00369362091075189	0.0380746859325418	DNMT1
ENSG00000142192	2681.54800443554	0.148044008049364	0.0509913798562823	2.90331441248739	0.00369235740336083	0.0380746859325418	APP
ENSG00000141540	502.557855182988	0.166965396220947	0.0575247568022172	2.90249634248799	0.00370201482736	0.0381370749482684	TTYH2
ENSG00000144357	1314.1417561023	0.155379282311498	0.053583573560521	2.89975587641614	0.00373453393684893	0.0384477586785452	UBR3
ENSG00000268895	18.6940825281857	0.439476377030719	0.151568944443169	2.89951466407092	0.00373740862431576	0.0384530475453132	A1BG-AS1
ENSG00000169446	870.52038211779	0.153489187248514	0.0529464500287438	2.89895143423568	0.0037441288409183	0.0384978702222452	MMGT1
ENSG00000204520	455.292018582083	-0.191519977325956	0.0660809012781434	-2.89826521160513	0.00375233139678807	0.0385499761765283	MICA
ENSG00000126457	1108.54287337016	0.10534096509117	0.0363486569770933	2.89807035119772	0.00375466357773208	0.0385499761765283	PRMT1
ENSG00000186687	594.838770282783	0.132974729392833	0.0458860460107244	2.89793392443869	0.00375629718131949	0.0385499761765283	LYRM7
ENSG00000070761	345.758898276165	-0.127689878260839	0.0440717000219605	-2.89732136943236	0.00376364001271896	0.0386010106342278	CFAP20
ENSG00000186854	1419.13685893824	0.206493361048471	0.0713093782510509	2.89573918764925	0.00378266637754583	0.0387474783191224	TRABD2A
ENSG00000130066	25114.0625896212	0.301247733949694	0.104031413788262	2.89573815235108	0.00378267885598358	0.0387474783191224	SAT1
ENSG00000196655	488.265408355356	-0.144703419615288	0.0499785419303286	-2.8953109479866	0.00378783113939501	0.0387710308660136	TRAPPC4
ENSG00000204209	1803.23985564948	-0.0988762777663772	0.0341523511385657	-2.8951528802573	0.00378973912560285	0.0387710308660136	DAXX
ENSG00000160799	1098.24042871367	-0.11258092920865	0.0388937295116717	-2.894577882403	0.00379668711463728	0.0387933770615417	CCDC12
ENSG00000141424	983.280177352513	0.104498889969134	0.0361007508810003	2.8946458846132	0.003795864806525	0.0387933770615417	SLC39A6
ENSG00000137801	864.027013041736	0.613777260296507	0.212078397306971	2.89410551989461	0.00380240356754206	0.0388274275263683	THBS1
ENSG00000267414	15.5773076314352	-0.442507268344403	0.152965859360987	-2.89284988292794	0.00381763712608837	0.0389585563111536	RP11-456K23.1
ENSG00000128335	3276.09884395507	-0.22046965415849	0.0762501335608298	-2.89140023581213	0.00383529339765934	0.0391142289090029	APOL2
ENSG00000260260	72.1215452102565	-0.301249157893543	0.104249419680323	-2.88969625746899	0.00385614218847288	0.0392572216286803	SNHG19
ENSG00000111752	340.34358031444	0.196052718518888	0.0678403681166829	2.88991236282333	0.00385349237241215	0.0392572216286803	PHC1
ENSG00000229151	11.0717892018764	0.565891030847897	0.195832854920655	2.88966338706126	0.00385654538011227	0.0392572216286803	RP11-348F1.3
ENSG00000204305	1280.14103504053	-0.238249095496343	0.0824801613877338	-2.88856243110813	0.00387007195752544	0.0393703072905789	AGER
ENSG00000005700	1182.23222817105	0.118188790801146	0.0409193696408694	2.88833361409121	0.00387288865560497	0.0393712141815677	IBTK
ENSG00000153107	623.686653376696	0.139350880595485	0.0482489744745238	2.88816253844037	0.00387499578394137	0.0393712141815677	ANAPC1
ENSG00000142065	389.216325256654	-0.145876155876633	0.0505323907805756	-2.88678516142376	0.00389199883610976	0.039502672209374	ZFP14
ENSG00000112293	11.4739759515363	0.499085109773079	0.172889934370922	2.88672161042257	0.00389278497550471	0.039502672209374	GPLD1
ENSG00000130713	475.789050421664	0.0970554119512377	0.0336358638267664	2.885474041966	0.00390824689961324	0.0395927515954409	EXOSC2
ENSG00000101346	650.442120927922	0.111872984566954	0.0387718596368092	2.88541704253834	0.00390895466110819	0.0395927515954409	POFUT1
ENSG00000163590	487.706023339984	0.229207736731296	0.0794365062153906	2.88542066678768	0.00390890965536389	0.0395927515954409	PPM1L
ENSG00000213619	579.575454702255	-0.124436280838144	0.0431471502307598	-2.88399767244496	0.00392661655530744	0.0397222384076349	NDUFS3
ENSG00000143633	533.473417639177	-0.121414900591823	0.0420984058965424	-2.88407358915685	0.00392567005621531	0.0397222384076349	C1orf131
ENSG00000184983	884.917053550619	-0.162413742434907	0.0563281528303114	-2.88334934263119	0.00393470811791328	0.0397793861678794	NDUFA6
ENSG00000170160	71.3795097537137	1.34500363885166	0.466528527723453	2.88300405854055	0.00393902365708481	0.0397983116023203	CCDC144A
ENSG00000214954	30.6514852775511	0.278264878491918	0.096547495607425	2.88215532408401	0.00394964985436555	0.0398809343943284	LRRC69
ENSG00000232630	28.626860759989	0.390756863034789	0.135602774806141	2.88162881322613	0.00395625487286088	0.03992287677465	PRPS1P2
ENSG00000168172	1732.7910242398	0.15145411964108	0.052595834822071	2.87958390913353	0.00398200319804903	0.0401578242022443	HOOK3
ENSG00000205809	54.1841569542827	-0.729485620923634	0.253382199510296	-2.8789931665819	0.00398946978369312	0.0401833607711873	KLRC2
ENSG00000177479	1411.60497235895	0.0809125698575682	0.0281032294713598	2.87911999366574	0.00398786570451593	0.0401833607711873	ARIH2
ENSG00000145723	216.778682446115	-0.160532502478629	0.0557741282556676	-2.87826107730006	0.00399874053323225	0.0402518461463249	GIN1
ENSG00000198780	148.596661159525	0.292033170505258	0.1014691034915	2.87805016952496	0.00400141497244329	0.0402538886078961	FAM169A
ENSG00000166619	1132.62965888234	-0.0758898747154193	0.0263749546141318	-2.8773461727497	0.0040103538425166	0.0403189092796715	BLCAP
ENSG00000176390	2308.69992707035	-0.0934653651563628	0.0324887557992099	-2.87685270971922	0.00401663030213814	0.0403570991554126	CRLF3
ENSG00000269981	243.704333174127	-0.373056107901566	0.129709519936582	-2.87608887985987	0.00402636320092801	0.0404299491082087	RP11-34P13.16
ENSG00000073060	238.198775055288	0.206772358833415	0.0719085539705292	2.87549043077904	0.00403400373211927	0.0404817121287902	SCARB1
ENSG00000100439	850.724676811148	-0.153210832863681	0.0532932008536175	-2.87486640715222	0.00404198479444376	0.0405368265684147	ABHD4
ENSG00000106560	2065.15545797428	-0.119809918963037	0.0416816712408118	-2.87440295449879	0.00404792147808515	0.0405713828391217	GIMAP2
ENSG00000260563	179.443490398261	-0.268986137796515	0.0936154963130864	-2.87330782178328	0.00406198124699737	0.040637277991306	RP13-516M14.1
ENSG00000092200	380.445293171868	-0.254644398323871	0.0886220900230896	-2.87337387616931	0.00406113195883384	0.040637277991306	RPGRIP1
ENSG00000165138	191.363458878974	0.16270216586444	0.0566247331568184	2.8733409729958	0.0040615549881975	0.040637277991306	ANKS6
ENSG00000198171	658.917290778989	0.118937985240153	0.0414035624046653	2.87265100712085	0.00407043495618139	0.0406968533648412	DDRGK1
ENSG00000149089	357.179010477901	-0.179202260168556	0.062395235456948	-2.8720503874403	0.00407817936713109	0.0406993304855784	APIP
ENSG00000119392	1228.2623397169	-0.0999018388507774	0.0347838695757521	-2.87207375341641	0.00407787783559424	0.0406993304855784	GLE1
ENSG00000240041	9.72309965868207	0.619629421062403	0.215741973351733	2.87208562819714	0.00407772460254868	0.0406993304855784	IGHJ4
ENSG00000015285	12971.8835894309	-0.146231040964152	0.0509335706422435	-2.87101491453007	0.00409156219800909	0.0408078833551586	WAS
ENSG00000268713	84.3868940691054	-0.254140165917759	0.088579363360549	-2.86906742469259	0.00411684029256606	0.0409847052842441	CTC-444N24.8
ENSG00000114626	12238.7222666532	-0.214729090281455	0.0748342341407912	-2.86939651012489	0.0041125588926971	0.0409847052842441	ABTB1
ENSG00000076944	3328.04339789306	-0.162879086638441	0.0567672028397367	-2.86924629875239	0.00411451264043586	0.0409847052842441	STXBP2
ENSG00000119969	99.8901793875742	-0.248199918059919	0.0865225020714798	-2.86861697382342	0.00412270721341528	0.0409929990139772	HELLS
ENSG00000185305	330.026778526391	-0.156295065137628	0.0544836825098444	-2.8686582466115	0.00412216933827283	0.0409929990139772	ARL15
ENSG00000066583	288.82557486975	-0.16302419301681	0.056845757286747	-2.86783395626989	0.00413292372594552	0.0410564245669646	ISOC1
ENSG00000141378	366.080329885829	-0.147045250839178	0.0512756241299261	-2.86774180391416	0.00413412760421329	0.0410564245669646	PTRH2
ENSG00000228649	29.0905668707717	0.448937925782264	0.156567282838404	2.86738019363612	0.00413885475522419	0.041078322607152	AC005682.5
ENSG00000226471	26.9036378508069	0.360819054578698	0.12591164674195	2.86565273281017	0.00416150473833763	0.0412779705683953	CTA-292E10.6
ENSG00000126561	3879.67512923136	-0.131337256803364	0.0458423518831864	-2.86497641172583	0.00417040306217262	0.0413159091688598	STAT5A
ENSG00000108604	2352.33256102587	-0.100479993323319	0.0350703164592555	-2.86510084504245	0.0041687646043557	0.0413159091688598	SMARCD2
ENSG00000169087	964.794655819871	-0.206640075310607	0.0721479161762884	-2.86411702876762	0.00418173482388755	0.0413784330601149	HSPBAP1
ENSG00000251192	308.204866235094	-0.187526250757477	0.065474472247062	-2.86411244446329	0.00418179534702211	0.0413784330601149	ZNF674
ENSG00000116903	1370.03745445511	-0.134867130075567	0.0470992358708063	-2.86346747631976	0.00419031830302408	0.0414375921076826	EXOC8
ENSG00000213985	12.7204887632646	0.422939507266735	0.147757571817314	2.86238804593821	0.00420461773866042	0.0415537676635694	AC078899.1
ENSG00000117560	228.403635985564	-0.330635863944801	0.115547662428071	-2.86146735465656	0.0042168492877094	0.0415737435526168	FASLG
ENSG00000108799	2806.75461585544	-0.120678926170387	0.0421701455364535	-2.86171471867622	0.0042135598453637	0.0415737435526168	EZH1
ENSG00000122741	648.489567684193	0.118291682726041	0.0413373550392422	2.86161711637681	0.00421485748090122	0.0415737435526168	DCAF10
ENSG00000269825	87.4025375038451	0.299875760975786	0.104791300406047	2.86164748231793	0.00421445372283974	0.0415737435526168	CTD-3099C6.9
ENSG00000234329	14.8623355641678	0.40606305679769	0.141967573470349	2.86025214682209	0.00423304295456626	0.0417081491839206	RP11-767N6.2
ENSG00000170144	6788.36047142485	0.0948903621710028	0.0331872638508834	2.85924029764439	0.00424656970895235	0.0418161311062315	HNRNPA3
ENSG00000135452	273.027202661314	0.135400526997492	0.0473680139221835	2.85848013851559	0.00425675755797795	0.0418658275040984	TSPAN31
ENSG00000085224	3803.55829318291	0.170156561711229	0.0595262762148804	2.85851177884857	0.00425633306433921	0.0418658275040984	ATRX
ENSG00000101342	42.1541115939445	0.305686510293191	0.106954486942286	2.85809898240308	0.00426187424989548	0.0418852633524132	TLDC2
ENSG00000162888	15.9273566716433	0.49899032171949	0.174597295202225	2.85794989631164	0.00426387711907049	0.0418852633524132	C1orf147
ENSG00000165525	1576.75273603059	0.122131332656321	0.0427444836597129	2.85724196901297	0.00427339929077227	0.0419282254510892	NEMF
ENSG00000178381	370.15401483361	0.17261859565847	0.0604110985348747	2.85739872051521	0.00427128920068593	0.0419282254510892	ZFAND2A
ENSG00000116106	413.571844482657	0.252588657142256	0.0884111141421561	2.85697855516354	0.00427694733138348	0.0419377731404231	EPHA4
ENSG00000240376	37.0205167463226	-0.256207374212618	0.0897111910164466	-2.85591319555269	0.00429132440963733	0.0420534299998575	RP11-36C20.1
ENSG00000105609	29.8517652600295	0.64466797483242	0.225829885083519	2.85466192658249	0.00430826629665631	0.0421940668512575	LILRB5
ENSG00000248455	12.0076195177319	-0.642105798673311	0.224971927557805	-2.85415965291192	0.00431508400486645	0.0422354406173437	RP11-321E2.3
ENSG00000259956	1502.12195240736	0.130329882288597	0.0456675690577262	2.85388263438882	0.00431884835297217	0.0422468967716863	RBM15B
ENSG00000204584	36.1021201936325	-0.426098751284375	0.149344568766542	-2.85312519098341	0.00432915630202717	0.0422715639634991	RP11-304F15.3
ENSG00000048740	12197.9297535331	-0.114322567893339	0.0400676505671217	-2.85323861706901	0.00432761128248482	0.0422715639634991	CELF2
ENSG00000108344	1151.30928454401	0.0925500829853673	0.0324358722142677	2.85332493524429	0.00432643584502544	0.0422715639634991	PSMD3
ENSG00000151655	19.321473017784	-0.446906340371271	0.156672476684426	-2.85248787680456	0.0043378467019446	0.0423310420818284	ITIH2
ENSG00000178917	176.791658496969	0.196442243284592	0.0688925648077647	2.85142879834329	0.00435232325389951	0.0424398782666598	ZNF852
ENSG00000237484	21.3523912778801	0.401446267870536	0.140794566057752	2.85129092060178	0.00435421112442982	0.0424398782666598	AP000476.1
ENSG00000134222	166.71625870018	-0.221961931115672	0.0778665854374103	-2.85054147255612	0.00436448582101663	0.0424891694960537	PSRC1
ENSG00000132313	559.403056601729	-0.151072671326081	0.0529962686544423	-2.85062845294143	0.00436329222099126	0.0424891694960537	MRPL35
ENSG00000256043	765.875004604169	0.145045474478463	0.0508881191729331	2.85028169316997	0.00436805244087016	0.0424984887123371	CTSO
ENSG00000167977	863.5802303628	-0.114537874328835	0.0401995665766897	-2.84923157343819	0.00438249691613654	0.0426135685212632	KCTD5
ENSG00000070501	834.525354321137	-0.177302061246352	0.0622394763934169	-2.84870746864293	0.00438972220141536	0.0426583565002697	POLB
ENSG00000165029	1221.65775696391	0.280964760809012	0.0986403651171841	2.84837510967471	0.00439430968005183	0.0426774727245105	ABCA1
ENSG00000138639	259.89833910787	0.237022230876495	0.0832190170634421	2.84817388188809	0.00439708929494601	0.0426790186810403	ARHGAP24
ENSG00000138785	175.805032584909	0.124990016768518	0.0438954985883907	2.84744497244587	0.00440717126857902	0.0427513987202779	INTS12
ENSG00000239569	182.620553410598	-0.246309527368076	0.0865282042042696	-2.84658083029905	0.00441915086512944	0.0428329737940343	KMT2E-AS1
ENSG00000159885	130.705171334228	-0.191110460093998	0.0671441837307332	-2.84626976567925	0.00442347037033006	0.0428329737940343	ZNF222
ENSG00000092051	20.4166050072766	0.436212444030488	0.153249304419779	2.84642364728533	0.00442133306171141	0.0428329737940343	JPH4
ENSG00000236345	153.690927274071	-0.243841304669808	0.0856926995634937	-2.84553183540606	0.00443373272655083	0.0429068359580115	RP11-59D5__B.2
ENSG00000153823	571.470407383485	0.263326067585701	0.0925481633108029	2.84528680165567	0.00443714516637996	0.0429130774277598	PID1
ENSG00000204524	111.185108142638	0.286824067764386	0.100813095371072	2.84510724235425	0.00443964729328761	0.0429130774277598	ZNF805
ENSG00000162924	1033.09191349908	0.221767996945432	0.0779649671049216	2.84445700652944	0.00444871891646313	0.0429752580026305	REL
ENSG00000213020	535.98680704013	0.144428145609459	0.0507870151501461	2.84380062861488	0.00445789326256165	0.0430383565900069	ZNF611
ENSG00000175564	103.542996798505	-0.213048119784546	0.0749325402279856	-2.84319895116778	0.00446631810459431	0.04309414867863	UCP3
ENSG00000067167	3437.52653827619	0.153414270967793	0.0539766426415168	2.84223440844007	0.00447985398534136	0.0431991603666398	TRAM1
ENSG00000188958	10.5046707573567	0.801275161498381	0.281982054914016	2.84158210614754	0.00448902910645916	0.04326202192716	UTS2B
ENSG00000177169	3119.5065881446	-0.183201426122238	0.0644825890911694	-2.84109910449186	0.00449583385429666	0.0432739932652247	ULK1
ENSG00000100124	236.419797936031	-0.161534342258135	0.0568634730176077	-2.84073999855964	0.0045008991583036	0.0432739932652247	ANKRD54
ENSG00000157954	2675.1944156603	-0.0930220173664574	0.0327452824796939	-2.84077614612555	0.00450038905139564	0.0432739932652247	WIPI2
ENSG00000125944	3822.0383224197	0.0933515172762183	0.0328584120748815	2.84102339040238	0.00449690139586888	0.0432739932652247	HNRNPR
ENSG00000149636	308.074280210293	-0.144295789428951	0.0508131198165878	-2.83973489425158	0.00451510397588075	0.0433849548408081	DSN1
ENSG00000261643	22.2985528463971	-0.430247035877558	0.151539090864125	-2.83918184690267	0.00452293732727397	0.0434345992036033	RP11-529E10.6
ENSG00000254802	16.8590497875582	-0.464786878259191	0.16376959522011	-2.83805353267501	0.00453895694038903	0.0435498053931388	AC022182.3
ENSG00000005156	501.278719224595	0.118245357620223	0.0416656125403523	2.83796038053454	0.00454028179269047	0.0435498053931388	LIG3
ENSG00000100796	4967.34816246997	0.0632539903319577	0.0222995760201788	2.83655573876021	0.00456030176043625	0.0436440016102556	PPP4R3A
ENSG00000116151	88.1702189771645	0.211503681971441	0.0745672196917447	2.8364163615833	0.00456229261874727	0.0436440016102556	MORN1
ENSG00000116962	507.039580480476	0.286295719192977	0.100912363079396	2.837072787283	0.00455292313128823	0.0436440016102556	NID1
ENSG00000262766	52.0232424770432	0.369328884788528	0.130213567583554	2.83633181735491	0.00456350062886138	0.0436440016102556	RP11-196G11.4
ENSG00000141527	22.5829087101526	0.37083989439602	0.130742833017311	2.83640705832738	0.00456242553412517	0.0436440016102556	CARD14
ENSG00000269821	75.4075752073641	-0.302146014913379	0.106571542362154	-2.83514724678205	0.00458045685879996	0.0437325153571862	KCNQ1OT1
ENSG00000185650	21776.1616290432	-0.199647152343011	0.0704191365457627	-2.83512638944768	0.00458075592626773	0.0437325153571862	ZFP36L1
ENSG00000111860	1685.74139361169	0.176480241832872	0.0622478356593466	2.83512253821427	0.00458081114995761	0.0437325153571862	CEP85L
ENSG00000031081	588.475963431751	0.235885990961913	0.0832608025067645	2.83309773458824	0.0046099288930331	0.0439847169776392	ARHGAP31
ENSG00000166704	287.180466442262	-0.148192114217483	0.0523168349947404	-2.83258943765198	0.00461726474186403	0.0440289173599177	ZNF606
ENSG00000198551	214.857734130451	-0.158126076063188	0.0558331028297944	-2.83212051719982	0.00462404167388375	0.0440677394631624	ZNF627
ENSG00000256967	31.5535448215353	0.456514520878338	0.161254289072009	2.83102250182305	0.00463994566385718	0.044193447384352	RP11-273B20.1
ENSG00000148334	481.813710415839	0.127658754373145	0.0451285440376351	2.82878069956531	0.00467257050449006	0.0444544837299338	PTGES2
ENSG00000164649	353.179789414649	0.233172084043102	0.0824289571455524	2.82876421245229	0.00467281120805837	0.0444544837299338	CDCA7L
ENSG00000180398	1065.3083241757	0.110468847840104	0.0390781550170347	2.82686958460422	0.00470054670858219	0.0446922383203025	MCFD2
ENSG00000198824	531.49191308852	-0.137145792976667	0.0485241855562453	-2.82633889481151	0.00470834216163241	0.0447402384985455	CHAMP1
ENSG00000023892	5593.1235777412	-0.132301790523315	0.046814441513072	-2.82608926321107	0.00471201311678618	0.0447490131971408	DEF6
ENSG00000138380	372.510713237874	0.188965936206551	0.0668905774266033	2.82500082188551	0.0047280494756575	0.0448751409149381	CARF
ENSG00000134884	6332.04366393252	0.15491896053913	0.054855833283357	2.82411096991087	0.00474119663875514	0.044973715582647	ARGLU1
ENSG00000279145	27.0288661627293	0.387949692299314	0.137383726504404	2.82384021870945	0.0047452034267168	0.0449855228235952	RP11-547D13.1
ENSG00000111348	39711.0749334062	-0.111335847386489	0.0394379652624616	-2.82306266678677	0.00475672729308968	0.0450685383493611	ARHGDIB
ENSG00000137094	112.53471673342	-0.373530077993886	0.132324529525364	-2.82283322172923	0.0047601326668948	0.0450745818289044	DNAJB5
ENSG00000164209	1153.43209521733	0.121489731011288	0.0430676706650373	2.82090322358471	0.00478886473675113	0.045293983720944	SLC25A46
ENSG00000141447	289.504999783626	0.210781954744381	0.0747205245225437	2.82093783590594	0.00478834808072178	0.045293983720944	OSBPL1A
ENSG00000049247	41.429769970523	0.775429980386268	0.274932017163611	2.82044262573032	0.00479574485723505	0.0453327315669108	UTS2
ENSG00000211595	14.536145068119	0.578521413728197	0.205158728055366	2.81987229698593	0.00480427646329335	0.0453870364023543	IGKJ3
ENSG00000124172	4203.55360263812	-0.170104680074306	0.060345475496948	-2.81884729009897	0.00481964417612789	0.0455058230125188	ATP5E
ENSG00000163156	1155.55342594902	-0.111470893053127	0.0395669580640812	-2.81727225207945	0.00484334509026274	0.0457031063065523	SCNM1
ENSG00000074966	1040.50618018644	0.19195441935656	0.0681440049641748	2.81689371585182	0.00484905693590619	0.0457305097365976	TXK
ENSG00000204406	483.451166216165	-0.130752431185767	0.0464210600721528	-2.81666189833962	0.00485255790751482	0.0457370431942673	MBD5
ENSG00000141569	576.814423487073	-0.120493555267064	0.04278301575441	-2.81638760480889	0.00485670331729058	0.0457496396348824	TRIM65
ENSG00000196456	81.8027134191746	-0.253620013553241	0.090075861732444	-2.81562683581733	0.00486821762297431	0.0457789380222127	ZNF775
ENSG00000172775	2831.78285008956	-0.126455141898843	0.0449232859677582	-2.81491300501929	0.0048790439666007	0.0457789380222127	FAM192A
ENSG00000145348	409.342329538742	0.118324167066919	0.0420351886009994	2.81488369637304	0.00487948894250392	0.0457789380222127	TBCK
ENSG00000164068	525.124533303235	0.128507462543305	0.0456405178088819	2.81564427207917	0.00486795344733263	0.0457789380222127	RNF123
ENSG00000221890	147.918469192225	0.2140936375553	0.076044534914044	2.81537177914624	0.00487208345237218	0.0457789380222127	NPTXR
ENSG00000230982	78.9731230395221	0.310125458722109	0.110152045914412	2.81543076342928	0.00487118919574637	0.0457789380222127	DSTNP1
ENSG00000171631	32.8444765277331	0.432641793638378	0.153697223217659	2.81489661674428	0.00487929277559722	0.0457789380222127	P2RY6
ENSG00000169951	267.783298377286	-0.122109240846597	0.0433908716711703	-2.81416888261612	0.00489035291138622	0.0458544489739479	ZNF764
ENSG00000204271	394.12232736458	0.176657661052461	0.062781036412984	2.81386977893097	0.0048949052749493	0.045870726244591	SPIN3
ENSG00000115355	1424.34529047567	0.196346591732113	0.0697920496488801	2.81330886139499	0.00490345278661034	0.0459244022630952	CCDC88A
ENSG00000272825	87.4631270384787	-0.349770069110879	0.124342457760362	-2.81295766072898	0.00490881140976937	0.0459360357493323	LL21NC02-1C16.2
ENSG00000204390	309.781343803938	-0.147024349501728	0.0522693889943375	-2.81281936388534	0.00491092299757157	0.0459360357493323	HSPA1L
ENSG00000138764	3176.22306813988	-0.134995445632546	0.047995425626821	-2.81267316352555	0.00491315615370153	0.0459360357493323	CCNG2
ENSG00000163607	231.30789473622	0.140289116935422	0.0498892008057395	2.81201371578762	0.00492324039245281	0.0460039106551227	GTPBP8
ENSG00000185669	405.527949371122	-0.194120784231815	0.0690492963600799	-2.8113361679967	0.00493362091149321	0.046046514701575	SNAI3
ENSG00000254838	3261.47343155061	0.178982975246646	0.0636644025944043	2.81135089552191	0.00493339506491616	0.046046514701575	GVINP1
ENSG00000177575	2226.22622178159	0.249992997960678	0.0889286827031766	2.81116272457445	0.00493628136973967	0.046046514701575	CD163
ENSG00000129484	195.700056489423	0.14372345269976	0.0511588260978919	2.80935790873596	0.00496404264010009	0.0462789710814598	PARP2
ENSG00000166783	5603.19046381921	-0.0980918459269865	0.0349199073878659	-2.80905229322205	0.00496875750303611	0.0462964264599252	KIAA0430
ENSG00000154229	1036.87086983913	0.157729405700072	0.0561658312665412	2.80828044637227	0.00498068315347194	0.0463280334212436	PRKCA
ENSG00000149557	85.5773386603459	0.428044452134602	0.152417481291035	2.80836849230745	0.00497932146676628	0.0463280334212436	FEZ1
ENSG00000120500	10.3920406644502	0.563707007467074	0.200722702800867	2.80838689197164	0.00497903694672089	0.0463280334212436	ARR3
ENSG00000275111	168.738672673632	-0.18617232720036	0.0663167688752567	-2.80731902892546	0.00499557401838259	0.0463537466447748	ZNF2
ENSG00000139718	4063.40710938489	-0.150304169932284	0.0535426967915885	-2.80718340574687	0.00499767784786791	0.0463537466447748	SETD1B
ENSG00000204130	304.757642754958	0.119777690122634	0.0426673593477302	2.80724403744957	0.00499673721078713	0.0463537466447748	RUFY2
ENSG00000122644	236.632142362676	0.203626058778995	0.0725250024835445	2.80766703627754	0.00499017928205393	0.0463537466447748	ARL4A
ENSG00000259162	21.7444394098554	0.546103319190523	0.194520731139558	2.80742991243809	0.00499385455345116	0.0463537466447748	RP11-203M5.6
ENSG00000278156	23.8272933481158	-0.338488359628208	0.120601941196047	-2.80665763976362	0.00500584127057987	0.0463656523305642	TSC22D1-AS1
ENSG00000176444	1785.82491359781	-0.126993215837953	0.045245329947818	-2.80676958228431	0.00500410216049799	0.0463656523305642	CLK2
ENSG00000135473	945.307386025659	0.162086942201978	0.0577530764926495	2.80655078561239	0.00500750183885691	0.0463656523305642	PAN2
ENSG00000221510	14.9590910815485	-0.50191399120806	0.178921629122725	-2.80521697499071	0.00502827189281149	0.0465050904703128	MIR548O
ENSG00000049759	86.125462047653	0.219609490062169	0.0782837687707228	2.80530042830923	0.00502697007985653	0.0465050904703128	NEDD4L
ENSG00000138175	320.199438534631	-0.146702663878248	0.0522998027639557	-2.80503283234853	0.0050311454666096	0.0465052589186552	ARL3
ENSG00000105204	532.676800289339	-0.163194747554194	0.0581936447018158	-2.80433969019132	0.0050419753726373	0.0465789296052999	DYRK1B
ENSG00000272644	13.8460611428896	-0.419974809752856	0.149795996631301	-2.80364508529929	0.00505284927145038	0.046652922950177	RP11-33O4.1
ENSG00000186446	83.452444062204	-0.268921624560071	0.0959283484324221	-2.80335926714632	0.00505732985020547	0.0466678364137657	ZNF501
ENSG00000171109	1251.1279921089	0.101532432551985	0.0362383144687987	2.80179787719998	0.0050818701759158	0.0468677347424352	MFN1
ENSG00000140280	1011.28143178688	-0.169577826265347	0.0605305072256305	-2.80152660266395	0.00508614474958615	0.0468806109431293	LYSMD2
ENSG00000167085	429.443834002132	0.131402107063053	0.0469085231941408	2.8012416105964	0.00509063897603132	0.046895496042207	PHB
ENSG00000132424	10412.9273026965	0.158227994717889	0.0564971326097395	2.80063761484794	0.00510017564779898	0.0469567895849079	PNISR
ENSG00000131013	838.443561320551	-0.139432532370933	0.049795432949431	-2.8001068393668	0.00510856955014959	0.0470074984538341	PPIL4
ENSG00000100242	7319.68386946252	0.117245647568974	0.0419063822482113	2.79779931549635	0.00514520701364997	0.0473079658793694	SUN2
ENSG00000107669	549.333970807467	0.126677064236788	0.0452792490787075	2.79768474111815	0.00514703232874333	0.0473079658793694	ATE1
ENSG00000205758	508.180032628677	0.132032658402758	0.047252262524469	2.7942081785901	0.00520269741221333	0.0477926298661695	CRYZL1
ENSG00000102595	83.8229175437517	0.286475744370566	0.102532186573183	2.7940079495534	0.00520591989017439	0.0477952746624973	UGGT2
ENSG00000148450	381.281602247958	-0.194745928951415	0.0697098997445571	-2.79366244486129	0.00521148466961355	0.0477989680926274	MSRB2
ENSG00000099338	52.8812216511349	0.303323152773044	0.108577153805074	2.79361856655031	0.00521219176843534	0.0477989680926274	CATSPERG
ENSG00000265206	902.766207183959	-0.280293255609665	0.100378632310353	-2.7923597797492	0.00523251406254694	0.0479044162657122	MIR142
ENSG00000198677	1913.38060240483	0.127535241325592	0.0456679874496724	2.7926617407027	0.00522763258370092	0.0479044162657122	TTC37
ENSG00000159905	20.787455925558	0.475640056408301	0.170329552641135	2.79246935738991	0.00523074216251551	0.0479044162657122	ZNF221
ENSG00000228382	50.3211651764472	-0.292991824480992	0.104950074111788	-2.79172575113106	0.00524277712676213	0.0479175707427468	ITPKB-IT1
ENSG00000182979	903.542248700644	0.119726205568213	0.0428818178184831	2.79200396949142	0.00523827135024315	0.0479175707427468	MTA1
ENSG00000256973	11.6039514318224	0.551461099365631	0.197531105340555	2.79176840738516	0.00524208607692066	0.0479175707427468	RP11-359J14.2
ENSG00000163141	42.6054661197452	-0.336221458959321	0.120483545910717	-2.7906006286408	0.00526103433945836	0.0479398271131165	BNIPL
ENSG00000174306	203.175310612793	0.153145347970805	0.0548799776903034	2.79055047789978	0.00526184946428107	0.0479398271131165	ZHX3
ENSG00000143537	709.613571570713	0.189333503896754	0.0678333137237788	2.79115811248336	0.00525198095713104	0.0479398271131165	ADAM15
ENSG00000124762	585.161568538876	0.230110442158457	0.0824624516096696	2.7904875208861	0.00526287289729553	0.0479398271131165	CDKN1A
ENSG00000237399	13.6217069322333	0.515887259833024	0.184839967683138	2.79099410316596	0.0052546429604713	0.0479398271131165	PITRM1-AS1
ENSG00000229515	13.4586265666168	0.640332345231007	0.229454555693907	2.79067174454017	0.00525987865309952	0.0479398271131165	FLT1P1
ENSG00000071051	2057.41328651154	0.123449530471162	0.0442444574826203	2.79016937928675	0.00526804737708806	0.0479601384184647	NCK2
ENSG00000143190	741.787389635665	-0.147747781409648	0.0529612535862412	-2.78973346371151	0.00527514487860958	0.0479720357732589	POU2F1
ENSG00000167220	15.4876851265029	0.536524155290848	0.192321361422015	2.78972731538407	0.00527524504635026	0.0479720357732589	HDHD2
ENSG00000175110	439.033950229392	0.12572480610655	0.045089718929716	2.78832534535255	0.00529813067076449	0.0481532668720654	MRPS22
ENSG00000204370	870.330258014684	-0.140357044508136	0.0503554139175999	-2.78732778838462	0.00531446925926323	0.0482748247772562	SDHD
ENSG00000105176	1455.56833767202	0.103428727408159	0.0371141304304239	2.78677490779561	0.0053235442573584	0.0483303039685598	URI1
ENSG00000231621	47.5020568725202	-0.417908377063888	0.14997322146584	-2.78655331251303	0.00532718545589739	0.0483364175600004	AC013264.2
ENSG00000101868	272.775848979606	0.142298541253062	0.0510797117065631	2.78581331998352	0.00533936113147903	0.0484199191249438	POLA1
ENSG00000180901	1269.92387008662	-0.110818782414613	0.039785906136659	-2.78537786808137	0.00534653770211298	0.0484580186724063	KCTD2
ENSG00000124813	1261.17418686707	-0.157498147731208	0.0565575060917589	-2.78474350470268	0.00535700807029784	0.0485057700946019	RUNX2
ENSG00000253476	22.624742456064	0.436204086670564	0.156643238612035	2.78469783014976	0.00535776265734566	0.0485057700946019	RP11-395I14.2
ENSG00000121892	3134.12760777323	0.10995780144914	0.0395144237804213	2.78272567152105	0.0053904362816973	0.0487744642888911	PDS5A
ENSG00000124209	1664.77966160604	-0.0826143441291218	0.029692571876186	-2.78232362200258	0.00539711925002409	0.0488078185592129	RAB22A
ENSG00000249592	52.4260621257748	0.287741787726607	0.103441972941253	2.78167343047511	0.00540794272996871	0.0488648520782389	RP11-440L14.1
ENSG00000197057	178.151746673768	0.361617277684796	0.130004064820442	2.7815843926438	0.00540942643194356	0.0488648520782389	DTHD1
ENSG00000160392	210.625982391576	0.1696644894402	0.0610135422213323	2.78076773226387	0.0054230521904082	0.048960782164733	C19orf47
ENSG00000043143	2678.00449947639	0.119198873750022	0.0428883359266782	2.77928418472109	0.00544788407723351	0.0491577218647658	JADE2
ENSG00000140264	1911.22451814377	-0.187005377522694	0.0672986498162352	-2.77873892022096	0.00545703657776907	0.0492130424928709	SERF2
ENSG00000184207	303.385980813043	0.158275548875943	0.0569760700943681	2.77793025411888	0.00547063594676047	0.0493083827697221	PGP
ENSG00000169871	3586.35037164375	-0.137509045013638	0.0495157154873164	-2.77707882558743	0.00548498750722931	0.0494103935454888	TRIM56
ENSG00000147669	516.979090284202	-0.126311965208699	0.0454911946063401	-2.77662449407505	0.00549265955274126	0.0494521537509657	POLR2K
ENSG00000174799	778.237759851299	0.123976829386712	0.0446754499592077	2.77505496866652	0.00551923784477251	0.0496365691760408	CEP135
ENSG00000198252	1189.86073146612	0.125195614685914	0.0451128158565637	2.77516737336844	0.00551733053564729	0.0496365691760408	STYX
ENSG00000109606	2972.30093090307	0.0959350634276763	0.034574808316435	2.77470991450368	0.00552509652169371	0.0496618361196609	DHX15
ENSG00000153214	1005.13760992871	0.126411580317654	0.0455663711028991	2.77422970620566	0.00553325932221627	0.0497077741759163	TMEM87B
ENSG00000258727	13.0527351812807	0.42991191598258	0.154991589763059	2.77377576834847	0.00554098557067002	0.0497497420008284	RP11-66N24.3
ENSG00000198839	535.683614287247	0.166410679639013	0.0600035393747971	2.7733477286993	0.00554827993573776	0.0497877880514385	ZNF277
ENSG00000152433	56.1389378304484	-0.368674082788667	0.133004263592245	-2.77189672594949	0.00557307147346553	0.0498322607450166	ZNF547
ENSG00000162881	454.320347770164	-0.276690480391402	0.0997942581910118	-2.77260922028	0.0055608854768971	0.0498322607450166	OXER1
ENSG00000276180	194.084719952944	-0.220809015759158	0.0796381565653861	-2.77265352793375	0.00556012846498313	0.0498322607450166	HIST1H4I
ENSG00000115307	2700.0869301901	-0.147173902739623	0.0530967863201907	-2.77180433957183	0.00557465334791062	0.0498322607450166	AUP1
ENSG00000159479	579.759822421865	-0.101677540803081	0.0366767058112343	-2.77226480825158	0.00556677305001843	0.0498322607450166	MED8
ENSG00000168014	746.097286420584	-0.101563246051647	0.0366326669377931	-2.77247753280193	0.00556313595298803	0.0498322607450166	C2CD3
ENSG00000130489	91.7064950907479	0.442998256246262	0.159818904570205	2.7718764400094	0.00557341878228424	0.0498322607450166	SCO2
ENSG00000144959	252.102096697923	0.209119527610985	0.0754613234423101	2.77121468417998	0.00558475919869386	0.0498952128739039	NCEH1
ENSG00000111652	727.898080500641	-0.10499548719277	0.0378964992444567	-2.77058539142314	0.00559556260873008	0.0499643246756507	COPS7A
ENSG00000136628	2380.36400164775	0.122557387073746	0.0442418826335141	2.77016663348106	0.00560276209822541	0.050001197969204	EPRS
ENSG00000100099	726.210335406787	0.0798244868782833	0.0288234936334786	2.76942441098003	0.00561554328425026	0.0500878167965958	HPS4
ENSG00000179562	1020.66841908421	-0.118511083676642	0.0428087902071947	-2.76838198657443	0.0056335384099279	0.050220821063216	GCC1
ENSG00000134686	7894.49770068513	-0.188054904425626	0.0679435331214851	-2.76781167810891	0.00564340551084017	0.050281261244559	PHC2
ENSG00000155629	6173.22109122902	0.17888876705136	0.064659711006244	2.76661872234605	0.00566409567447822	0.0504111033044298	PIK3AP1
ENSG00000113356	45.4565537527313	0.290598912974271	0.105037731954747	2.76661450667525	0.00566416891061009	0.0504111033044298	POLR3G
ENSG00000064607	2079.11583261477	0.15600157305734	0.0563929110522282	2.76633303985423	0.0056690605850981	0.0504270834240812	SUGP2
ENSG00000173281	3914.83354992472	-0.237308203030727	0.0857995650805502	-2.7658438921915	0.00567757065728706	0.0504752146808048	PPP1R3B
ENSG00000125945	313.149214230392	-0.160464329010954	0.0580235953070074	-2.7655013130766	0.00568353762472091	0.0504815921265306	ZNF436
ENSG00000178761	233.732331281701	0.171167220248478	0.0618949596162381	2.76544683621657	0.00568448701173065	0.0504815921265306	FAM219B
ENSG00000259448	88.2151849121171	-0.303416904137807	0.109744812297539	-2.76474940168639	0.00569665408783886	0.0505620736395812	RP11-16E12.1
ENSG00000063169	818.671495954054	-0.154672881734462	0.0559557523948494	-2.76419983852633	0.00570625801867271	0.050619730038193	GLTSCR1
ENSG00000167210	88.9310206058899	0.432779788134841	0.156621360067031	2.76322327905734	0.0057233599905212	0.050743801941001	LOXHD1
ENSG00000120709	3016.67479123339	0.210223408129706	0.0760894578167496	2.76284539490344	0.00572999007131787	0.0507749446635224	FAM53C
ENSG00000175137	1973.30029762934	-0.161975740911346	0.0586530195733905	-2.76159253333362	0.00575202145015431	0.0508845694260637	SH3BP5L
ENSG00000116584	6302.68699640925	-0.123264952616298	0.0446331040463359	-2.76173829380834	0.00574945435385563	0.0508845694260637	ARHGEF2
ENSG00000141568	866.682216155677	0.0931324433071232	0.0337204289756842	2.7618997188405	0.00574661258305149	0.0508845694260637	FOXK2
ENSG00000106546	904.618739734178	0.230966949541367	0.083640295777302	2.76143152525826	0.00575485828469389	0.0508845694260637	AHR
ENSG00000090339	904.492827017566	0.231469735519001	0.0838395536824783	2.7608655503539	0.00576484032840952	0.0509451733200249	ICAM1
ENSG00000257596	17.0055764099347	-0.492009534147276	0.17828455926147	-2.75968674003732	0.00578568102900867	0.0510739224495741	RP11-968A15.2
ENSG00000135486	19025.1728913791	0.123042949975479	0.0445847697238735	2.75975295459683	0.00578450859468994	0.0510739224495741	HNRNPA1
ENSG00000127957	141.456154645196	0.239377497960289	0.0867556423801935	2.75921532470768	0.00579403438370273	0.0511199555836221	PMS2P3
ENSG00000183718	715.61313434687	0.106552162288979	0.0386204774252728	2.75895507752714	0.00579865055189917	0.0511329840491509	TRIM52
ENSG00000175193	175.052620104254	-0.241151987428923	0.0874254381299166	-2.75837322165392	0.0058089832926972	0.0511410329125185	PARL
ENSG00000118680	7776.29459554908	-0.111851958808493	0.0405480254036871	-2.75850569034917	0.00580662942244051	0.0511410329125185	MYL12B
ENSG00000163995	19.5337041351001	0.345219823490379	0.125143306533771	2.75859598928864	0.00580502537032882	0.0511410329125185	ABLIM2
ENSG00000197111	2761.6306190982	-0.0949229251096509	0.0344178852159981	-2.75795344524913	0.0058164480909796	0.0511790870112289	PCBP2
ENSG00000183691	339.401708113683	-0.31678689737686	0.114877388019858	-2.75760881090105	0.00582258311687565	0.0512054056288087	NOG
ENSG00000248971	26.932351851595	0.474291098317052	0.172026116919975	2.75708774230884	0.00583187002473056	0.0512593994024752	KRT8P46
ENSG00000198589	1634.60630993477	0.142893119928846	0.0518495608305471	2.75591765175879	0.00585277300786289	0.0514153797082324	LRBA
ENSG00000011009	1210.83843864569	-0.0962609486190162	0.0349425288863438	-2.75483634662278	0.00587214991134142	0.0515577927795244	LYPLA2
ENSG00000162129	367.789982918799	0.137338510228018	0.0498693317769716	2.75396732489279	0.00588776460307555	0.0516670377641656	CLPB
ENSG00000140577	1284.98976002478	0.11215864026448	0.0407411301977255	2.75295848986393	0.00590593841118402	0.0517986100715962	CRTC3
ENSG00000271680	14.6826388214106	0.48531290882355	0.176324904046915	2.75237869231689	0.00591640612388747	0.0518624900644538	RP11-564A8.8
ENSG00000143641	986.766369979386	0.120973795962862	0.0439784529383569	2.75075151307453	0.00594587272285987	0.0520761728041556	GALNT2
ENSG00000116668	274.49757614108	0.151647200389973	0.0551308116779991	2.75067962495626	0.00594717759045432	0.0520761728041556	SWT1
ENSG00000182544	502.133337846257	-0.134772398868359	0.0490074743266548	-2.75003763650512	0.00595884200570771	0.0521502739102426	MFSD5
ENSG00000039650	781.813983636769	0.150459377374543	0.0547217543555235	2.74953497281938	0.00596798938740862	0.0522022788145673	PNKP
ENSG00000167615	4978.58658295174	0.19538408031882	0.0710893366649529	2.74843020746802	0.00598813818432132	0.052350406123479	LENG8
ENSG00000148200	222.689697307861	-0.266879833565105	0.0971175654262099	-2.74800786442573	0.00599585709030102	0.052366261653148	NR6A1
ENSG00000157168	183.290215974407	0.479610483526057	0.174532068066976	2.74797914697262	0.00599638226703021	0.052366261653148	NRG1
ENSG00000153363	78.5654817353507	-0.228115893056076	0.0830508450032942	-2.74670165062171	0.00601978673457424	0.0525424793922887	LINC00467
ENSG00000159086	1367.75877861591	0.14196742305948	0.0516931958834978	2.74634641238735	0.0060263095115452	0.0525712388936993	PAXBP1
ENSG00000185049	587.63897872881	-0.121652110319331	0.0443078158712695	-2.74561288854263	0.00603979840687512	0.0526607048462393	NELFA
ENSG00000204516	770.826780433989	-0.16714042690998	0.0609060950796281	-2.74423153694983	0.00606527417940795	0.0528469185861442	MICB
ENSG00000106211	646.319084839032	-0.161360765042908	0.0588064921137829	-2.74392774067692	0.0060708899536241	0.0528469185861442	HSPB1
ENSG00000242553	14.8840394237851	0.522940285258519	0.190579976101535	2.74394139382153	0.00607063747026515	0.0528469185861442	AP001432.14
ENSG00000274341	19.6181235312914	-0.467611156872012	0.170448224263723	-2.74342052486571	0.00608027644361131	0.0529003538659709	RP11-227G15.10
ENSG00000134755	1628.64651226093	0.354895191119754	0.12937816074271	2.74308421979751	0.0060865072800156	0.0529262915481122	DSC2
ENSG00000270210	38.8581428587026	-0.42258863339621	0.154106515137798	-2.74218538404001	0.00610318854715564	0.0530147369960127	RP11-373D23.3
ENSG00000266993	15.8134336780353	0.497415877504247	0.181392556606934	2.74220666387163	0.00610279314468409	0.0530147369960127	RP4-657D16.3
ENSG00000163125	1419.55638256334	0.104741142052081	0.038206410310231	2.74145467217664	0.0061167799775133	0.0530896760047139	RPRD2
ENSG00000135164	2554.60310594802	0.120026352581153	0.0437833279017338	2.74137116416863	0.00611833498255344	0.0530896760047139	DMTF1
ENSG00000130724	3178.96358565772	-0.137323348294063	0.0500988917374652	-2.74104563058366	0.00612440015256241	0.0530959036624797	CHMP2A
ENSG00000038358	895.660445621542	0.129171524857942	0.0471259900658813	2.74098272900712	0.00612557272559706	0.0530959036624797	EDC4
ENSG00000076053	465.073522360312	-0.161679982299403	0.0589930323026416	-2.74066234585068	0.0061315482521967	0.0531194289274083	RBM7
ENSG00000225231	23.8523242555659	1.01295613844052	0.369644095810309	2.74035524960837	0.00613728088916669	0.0531408260722264	AC091814.2
ENSG00000122484	679.265084490876	0.143322044533594	0.0523111970308019	2.73979669112146	0.00614772000516844	0.0532029307779906	RPAP2
ENSG00000188352	456.592156838532	-0.148796082679834	0.0543208134130173	-2.73920939932347	0.00615871337194122	0.0532697635097221	FOCAD
ENSG00000171262	474.325988958135	-0.142197086516484	0.0519300616877079	-2.73824220297706	0.00617685666412233	0.0533700076862389	FAM98B
ENSG00000129194	14.1651726269353	0.447879840389935	0.163563883399348	2.7382563380231	0.00617659116364424	0.0533700076862389	SOX15
ENSG00000260916	1044.14467695303	-0.16207775964817	0.0591994995374197	-2.73782313895613	0.00618473267029167	0.0533992701857084	CCPG1
ENSG00000183250	127.268291493511	0.267434217982732	0.0976852577322239	2.73771318406945	0.00618680069014746	0.0533992701857084	LINC01547
ENSG00000197147	392.604128209026	-0.198599553659895	0.0725680125935992	-2.73673684261008	0.00620519094505173	0.0535296318443102	LRRC8B
ENSG00000182749	163.177760308742	-0.229065011485868	0.0837332352870039	-2.73565222579452	0.00622567835890112	0.0536607822951677	PAQR7
ENSG00000177425	123.898607930946	0.213607101421881	0.0780846650480315	2.73558324532079	0.00622698339398704	0.0536607822951677	PAWR
ENSG00000110066	2278.12920339407	-0.0780713161755263	0.0285521653467853	-2.73433959306755	0.00625055422038445	0.0538354186078274	KMT5B
ENSG00000109323	2596.19203194256	-0.110694190679107	0.0404856401751012	-2.73415932662426	0.0062539774505518	0.0538364327363304	MANBA
ENSG00000196204	319.859145401757	-0.127757282852071	0.0467304656281054	-2.7339184648576	0.00625855401001948	0.0538473688120376	RNF216P1
ENSG00000164976	27.5832220965344	-0.381808535935004	0.139737975253012	-2.73231764839654	0.00628904743996222	0.0539626713207853	KIAA1161
ENSG00000251023	38.4560543170299	-0.307046590067485	0.112405692778747	-2.73159288001417	0.00630289724474222	0.0539626713207853	RP11-549J18.1
ENSG00000178700	326.650497303454	-0.145950716616351	0.053408064666381	-2.73274677762708	0.00628086000498133	0.0539626713207853	DHFR2
ENSG00000107371	318.010648107531	-0.115033292217411	0.0420989785282942	-2.73244853530351	0.00628654920712592	0.0539626713207853	EXOSC3
ENSG00000223501	599.091243233515	0.111033478618945	0.0406466395048068	2.73167671354022	0.0063012938432306	0.0539626713207853	VPS52
ENSG00000179195	1171.31109064942	0.113266922119339	0.0414491121744185	2.73267426435361	0.00628224282496478	0.0539626713207853	ZNF664
ENSG00000081014	572.384080820326	0.13386176157941	0.049004086394017	2.7316448775944	0.00630190269485413	0.0539626713207853	AP4E1
ENSG00000165732	3041.89076036403	0.146416543821547	0.053594894762033	2.73191214334223	0.00629679297170192	0.0539626713207853	DDX21
ENSG00000177301	47.1265614584683	0.317782658676167	0.116340901927253	2.7314783830271	0.00630508770942804	0.0539626713207853	KCNA2
ENSG00000273311	36.2508332702894	0.334076713351695	0.122253878938426	2.73264714586238	0.00628276004195173	0.0539626713207853	DGCR11
ENSG00000124177	1386.32907456698	0.127210531034519	0.0465861702315661	2.73065011358936	0.00632095391445381	0.0540700506327254	CHD6
ENSG00000176658	122.774191714627	0.230225629946187	0.0843252879844471	2.73020864142972	0.00632942536174305	0.0541140949431543	MYO1D
ENSG00000101343	1641.68158284667	-0.109906752074422	0.0402668526456861	-2.72945971321642	0.00634381998304108	0.0542087072737618	CRNKL1
ENSG00000113593	1917.52660834848	-0.13208592150827	0.0484034665057106	-2.72885251912044	0.00635551205142348	0.05428013884716	PPWD1
ENSG00000166471	656.087827626461	-0.14791716590341	0.0542233374030428	-2.72792441387256	0.00637342103041291	0.0544045641102385	TMEM41B
ENSG00000176024	163.462398819947	-0.148995173907516	0.0546516771134103	-2.72626901455063	0.00640547684787133	0.0546258629792107	ZNF613
ENSG00000075292	4356.17163128453	-0.0769369905481234	0.0282209235554418	-2.72623928827048	0.00640605380305105	0.0546258629792107	ZNF638
ENSG00000122707	319.331531067132	0.140845529904525	0.0516754132999347	2.72558110153911	0.0064188404861369	0.0547062558857727	RECK
ENSG00000100429	58.7755674106001	-0.339527392839986	0.12459335225761	-2.72508433787042	0.00642850638291199	0.0547313557022936	HDAC10
ENSG00000110218	342.983337268723	0.196199947542395	0.0719946720225265	2.72520093543874	0.00642623648269161	0.0547313557022936	PANX1
ENSG00000118496	584.64951490424	-0.154411136707796	0.0566842055973237	-2.72405928742672	0.00644849294697912	0.0548113762037084	FBXO30
ENSG00000162664	665.734497385328	0.124424897255851	0.0456743841958897	2.72417240968621	0.00644628453377864	0.0548113762037084	ZNF326
ENSG00000163600	340.732529084535	0.201360188796497	0.073919330898194	2.72405318540859	0.00644861209210488	0.0548113762037084	ICOS
ENSG00000172250	18.8066269865863	0.526034493267322	0.193117276239464	2.72391214038791	0.00645136662261368	0.0548113762037084	SERHL
ENSG00000181908	59.3142052605563	-0.273196786117769	0.100367332779835	-2.72196917613673	0.00648941950342093	0.0550490812335852	AP003774.4
ENSG00000125534	1938.46643168603	-0.182972006321644	0.0672187726905933	-2.72203729698934	0.00648808195124278	0.0550490812335852	PPDPF
ENSG00000205683	36.0771926071641	0.312541177353395	0.114821857952291	2.72196586022198	0.00648948461770022	0.0550490812335852	DPF3
ENSG00000274383	68.2060523434861	-0.647799376391071	0.238004597668728	-2.72179353985727	0.00649286926408128	0.0550491211369557	CTD-2017F17.2
ENSG00000272669	145.06302044943	-0.293401401282107	0.107865425907805	-2.72006900091309	0.00652682952235961	0.0553082582885905	RP3-508I15.21
ENSG00000123415	275.434423168557	-0.145735067748019	0.0535829765799551	-2.71980164316845	0.00653210870993453	0.0553235426960291	SMUG1
ENSG00000244038	2100.46870974362	0.0982168651348107	0.0361144830574583	2.71959770207834	0.00653613826789211	0.0553235426960291	DDOST
ENSG00000173068	47.9905697651373	0.496800991264911	0.182683566555314	2.71946185764054	0.00653882358260305	0.0553235426960291	BNC2
ENSG00000102096	4273.02967840036	-0.148090843052989	0.054469513102728	-2.71878404298738	0.00655223716543747	0.0554082485532087	PIM2
ENSG00000080819	414.033958543155	0.118288463070633	0.0435310682274108	2.71733426004348	0.00658101068664085	0.055622688662854	CPOX
ENSG00000102245	648.826175966851	-0.14139328434884	0.0520417767310417	-2.71691885308947	0.00658927609371528	0.0556636616900108	CD40LG
ENSG00000113916	11096.8227635334	-0.223217227665801	0.0821773150645494	-2.71628767002751	0.00660185269500993	0.0556832598879475	BCL6
ENSG00000133706	1996.18980537151	0.105663618575796	0.0388970571507725	2.7164939025136	0.00659774104951346	0.0556832598879475	LARS
ENSG00000271032	26.2417809548946	0.392069963231941	0.144337298634011	2.71634544183964	0.00660070066938078	0.0556832598879475	CTD-2527I21.14
ENSG00000115594	566.003442503367	-0.232857234719825	0.0857453444164025	-2.7156837062664	0.00661390714412705	0.055756058828363	IL1R1
ENSG00000088812	787.185975493164	0.117889894005683	0.0434158746067713	2.71536379431354	0.00662030024784915	0.0557810812916291	ATRN
ENSG00000230989	1596.22962340323	-0.11021443407689	0.0406210333916449	-2.71323560418233	0.00666297150735664	0.0560974278265689	HSBP1
ENSG00000269956	26.8016523886216	0.404088543498103	0.14893715667465	2.71314796468705	0.00666473401144538	0.0560974278265689	MKNK1-AS1
ENSG00000101782	2269.34459566814	0.0939217314226874	0.0346225486858677	2.71273303057046	0.00667308437747307	0.0561330027700689	RIOK3
ENSG00000115816	757.927842544515	0.158825376139752	0.0585510719144012	2.71259553321153	0.00667585352524243	0.0561330027700689	CEBPZ
ENSG00000089195	558.813170772498	0.107648470553744	0.0396954116279403	2.71186180314033	0.00669064805980525	0.0562104141117204	TRMT6
ENSG00000103479	6042.30454501917	0.149158864822468	0.0550037049717328	2.71179668531643	0.0066919624831231	0.0562104141117204	RBL2
ENSG00000235513	10.7656243121063	0.529945198344067	0.195434749262311	2.71162216721642	0.00669548632948833	0.0562110236331838	RP4-756G23.5
ENSG00000117305	407.859518939851	-0.131241037219186	0.0484122191557424	-2.7109072772926	0.0067099387103091	0.0562743417995902	HMGCL
ENSG00000108788	1419.45992972985	-0.111922078226666	0.0412835192012479	-2.71105953155473	0.00670685835471031	0.0562743417995902	MLX
ENSG00000101898	10.0630634623356	0.544405429078829	0.200854216425626	2.71045058832717	0.00671918591326365	0.0563228929332604	MCTS2P
ENSG00000122705	1552.57379378648	-0.0970415859069308	0.0358114239179458	-2.70979411847127	0.00673249842003874	0.0564054535839357	CLTA
ENSG00000272927	36.9761879457495	-0.323251224574479	0.119327307954038	-2.70894592459077	0.00674973398747593	0.0565207801820157	RP11-1191J2.5
ENSG00000183208	54.3647802299848	-0.237579865840353	0.0877133773724582	-2.7085932950856	0.00675691119387144	0.0565518050434657	GDPGP1
ENSG00000179598	70.094147322813	-0.240995135344424	0.0890330666287377	-2.70680483633523	0.00679341811529274	0.0567433838433009	PLD6
ENSG00000187531	1843.67713937764	-0.120522191139574	0.0445248909588063	-2.70684977647848	0.00679249860765731	0.0567433838433009	SIRT7
ENSG00000143614	2226.06524393068	-0.0997433817250059	0.0368451979694306	-2.70709311448836	0.00678752167920762	0.0567433838433009	GATAD2B
ENSG00000132670	2505.52746289678	0.0696808308896063	0.025742983549599	2.70678924046827	0.0067937372440865	0.0567433838433009	PTPRA
ENSG00000111640	6993.84198726342	0.156849527473024	0.0579602364774639	2.70615747977512	0.00680667591277529	0.0568223119381707	GAPDH
ENSG00000109686	16.5765746063902	0.486305833439921	0.179732691180894	2.70571719727087	0.00681570613371481	0.056868548053183	SH3D19
ENSG00000226742	185.064858166654	0.215362104266839	0.0796467122950165	2.70396728328376	0.00685170349349541	0.0571396286730977	HSBP1L1
ENSG00000266896	18.2852165596091	0.424635559260403	0.15705813314528	2.70368398475494	0.00685754724722727	0.057159095197334	RP1-266L20.9
ENSG00000180233	479.776538609824	0.140747131060957	0.0520731442194509	2.70287368221533	0.00687428653098321	0.0572693118824162	ZNRF2
ENSG00000008516	11448.6391644009	-0.238298312095289	0.0882081543850461	-2.70154515482854	0.0069018107860906	0.0573812109612341	MMP25
ENSG00000157916	2405.20020950087	-0.0810462281288027	0.029999689931161	-2.70156886003742	0.00690131879844678	0.0573812109612341	RER1
ENSG00000067369	631.133144490294	0.124158135616056	0.0459498226594915	2.70203731875361	0.00689160267499877	0.0573812109612341	TP53BP1
ENSG00000138760	1268.20543062323	0.135795772102517	0.05026137319465	2.70179192232996	0.00689669081485642	0.0573812109612341	SCARB2
ENSG00000124444	111.029396210805	-0.197272362820481	0.0730472840412364	-2.70061187639937	0.00692120548704288	0.0574170951920231	ZNF576
ENSG00000176623	741.154869902385	0.104804352733358	0.0388079527185499	2.70058958001312	0.00692166943222038	0.0574170951920231	RMDN1
ENSG00000198728	2309.61803181768	0.109645250559419	0.0405996711256678	2.70064381112928	0.00692054103501619	0.0574170951920231	LDB1
ENSG00000111371	6242.50498223875	0.130078830205512	0.0481686128903213	2.70048943492929	0.00692375360453941	0.0574170951920231	SLC38A1
ENSG00000108785	52.9506300560114	0.324144769836281	0.1200127829599	2.70091870084029	0.00691482389354783	0.0574170951920231	HSD17B1P1
ENSG00000130222	53.5536601607035	-0.388237593538864	0.143805000411092	-2.69975030373782	0.00693915349762693	0.0574993335232513	GADD45G
ENSG00000112308	8416.48158087343	-0.0777742113647697	0.0288105404892707	-2.69950546029268	0.00694426162216709	0.0574993335232513	C6orf62
ENSG00000182606	1520.56984162651	0.0942543363732892	0.0349135207460516	2.69965143472242	0.00694121577760376	0.0574993335232513	TRAK1
ENSG00000067225	10297.3762555836	0.120775969153003	0.0447435028617695	2.69929624254336	0.00694862917016549	0.0575062618366288	PKM
ENSG00000261218	115.603906623435	-0.251612324383118	0.0932262052033794	-2.69894418456923	0.00695598416445379	0.0575086873535324	RP11-960L18.1
ENSG00000171045	245.061968064261	0.170706870856376	0.063246880469182	2.69905597857203	0.0069536478706072	0.0575086873535324	TSNARE1
ENSG00000117602	3204.56634020869	0.163407729291493	0.0605731580623891	2.69769208868367	0.00698219892964787	0.0576961308813672	RCAN3
ENSG00000143727	1253.22751365279	0.0860955568459209	0.0319245018036478	2.69684887724962	0.00699990296398261	0.0578130930904588	ACP1
ENSG00000139154	662.193077444676	0.114475682598045	0.0424674619065365	2.69560923725525	0.0070260036023757	0.0579756450603619	AEBP2
ENSG00000036448	480.411852379862	0.910606137037386	0.33781504308198	2.69557604282413	0.00702670371149717	0.0579756450603619	MYOM2
ENSG00000203950	225.138105173457	-0.15414564080239	0.0571931397352138	-2.6951771054367	0.00703512266666775	0.0580157179098824	FAM127B
ENSG00000166200	1135.71176310581	0.13018956734165	0.0483119989796726	2.69476672651089	0.0070437925281981	0.0580578182726531	COPS2
ENSG00000023697	350.136664839142	0.159622473530428	0.059252911770253	2.69391779680545	0.00706175788191924	0.0581378453772079	DERA
ENSG00000037757	342.123484974689	0.169698247002932	0.0629951344501632	2.6938310154284	0.00706359669636287	0.0581378453772079	MRI1
ENSG00000228878	51.6289038509085	0.281940516859695	0.104662670565693	2.69380205316595	0.00706421047470341	0.0581378453772079	SEPT7-AS1
ENSG00000130165	591.661696327983	-0.10211392389816	0.0379193446066084	-2.69292428330538	0.00708283521297457	0.0582145322984426	ELOF1
ENSG00000116580	1645.51293543896	0.0868888557892767	0.0322647034825051	2.69300028857822	0.00708122077251906	0.0582145322984426	GON4L
ENSG00000153015	554.711898750879	0.13635407330046	0.050635455858581	2.69285762295261	0.00708425142847137	0.0582145322984426	CWC27
ENSG00000165813	1774.22680569712	0.177739719550002	0.0660091147785506	2.69265419095967	0.00708857496294486	0.0582206860420993	CCDC186
ENSG00000272690	11.4086011062616	-0.473002195191668	0.175685890797823	-2.69231748231845	0.0070957362281996	0.0582501290063946	RP11-803B1.8
ENSG00000200814	12.9303620707994	0.549193644986146	0.2040338342884	2.69167928398515	0.0071093275326308	0.0583323010196261	RNU6-595P
ENSG00000162869	1304.72186720068	-0.0895105042604575	0.0332600244575038	-2.69123386769678	0.00711882712390123	0.0583808345251659	PPP1R21
ENSG00000197442	2738.30482574203	-0.11204298581657	0.0416566885212446	-2.68967577102122	0.00715214706289798	0.0586245693072066	MAP3K5
ENSG00000186162	231.926374022969	-0.130722433590312	0.0486219263902976	-2.68854904145462	0.00717632935748779	0.0587931973065411	CIDECP
ENSG00000073169	861.985939137168	-0.164042572290652	0.0610406321114022	-2.68743239734585	0.00720036757720359	0.0589012489853917	SELO
ENSG00000090615	1903.65519967557	-0.0933900631964793	0.0347490545320239	-2.6875569552666	0.00719768261763809	0.0589012489853917	GOLGA3
ENSG00000123124	1616.99297269211	0.128096069563508	0.0476647461865454	2.68743840703942	0.00720023801214132	0.0589012489853917	WWP1
ENSG00000259298	15.8734738191352	0.501675000444005	0.186725779947732	2.68669382762484	0.00721630659750699	0.0590020007799178	RP11-562A8.4
ENSG00000258311	19.8869783226558	0.396435888856755	0.147605600547242	2.68577809640681	0.00723611289483989	0.0591342552525124	RP11-644F5.10
ENSG00000185513	105.469279345163	0.168632463749093	0.0627930462240776	2.68552768004479	0.00724153762374168	0.0591489083640325	L3MBTL1
ENSG00000119801	4711.54407715939	0.12769225604289	0.047552236212364	2.68530496594583	0.00724636530908482	0.0591586725759721	YPEL5
ENSG00000259635	12.6600172488165	0.523249548097158	0.194887791842574	2.68487596452335	0.00725567274392959	0.0592049809520948	AC100830.3
ENSG00000170632	562.546457074849	-0.099649859438587	0.0371184257148837	-2.68464670899633	0.00726065097272037	0.0592159350989969	ARMC10
ENSG00000078403	1070.20953424053	0.112009042592627	0.0417436764731763	2.6832577304158	0.00729087790453896	0.0594326969125256	MLLT10
ENSG00000130810	42.7484801706011	-0.327511670684264	0.122082373293158	-2.68271054903075	0.00730281662722915	0.0594692826739889	PPAN
[truncated: 14,288 more rows]

## Sheet: mrna_male
GeneID	baseMean	log2FoldChange	lfcSE	stat	pvalue	padj	symbol
ENSG00000136682	334.42785906062	0.356109728154896	0.0640722363313907	5.5579412947762	2.72975158162991e-08	0.000444676532647512	CBWD2
ENSG00000168591	2659.54160894571	0.294556443280654	0.0545196178718791	5.40276059844845	6.56230179522401e-08	0.000534499481220995	TMUB2
ENSG00000087258	101.870588163321	-0.641248782236356	0.128293941092981	-4.99827799172224	5.78445534173433e-07	0.000951222446366615	GNAO1
ENSG00000175505	182.879204281873	-0.424693088847749	0.0841244208694474	-5.04839242230065	4.45543239863769e-07	0.000951222446366615	CLCF1
ENSG00000111237	3378.94174737334	0.254171893990622	0.050870420233749	4.99645752527117	5.83930292428861e-07	0.000951222446366615	VPS29
ENSG00000266173	342.46440607788	0.334090446892599	0.0646205073189199	5.17003751214411	2.34047009343103e-07	0.000951222446366615	STRADA
ENSG00000135124	742.788176391764	0.345492087073513	0.0670799827341863	5.15044985092755	2.59862411068649e-07	0.000951222446366615	P2RX4
ENSG00000182117	3432.01219771181	0.411884712818561	0.0809132835322785	5.0904461521976	3.57222007717059e-07	0.000951222446366615	NOP10
ENSG00000145431	185.498998685682	0.521647105381732	0.104242359751421	5.00417590915695	5.61015099198338e-07	0.000951222446366615	PDGFC
ENSG00000136810	2233.8507975975	0.58433075843528	0.115424932845575	5.06243100194866	4.1394389805241e-07	0.000951222446366615	TXN
ENSG00000090615	1714.40487893527	-0.202089229222079	0.0411728555744606	-4.90831219750116	9.18635381594577e-07	0.00136041548783415	GOLGA3
ENSG00000113648	9395.56166578757	0.260557514703256	0.0535037784631337	4.86988998137375	1.11660401804271e-06	0.00139919072722428	H2AFY
ENSG00000254901	610.271464331119	0.322971898399968	0.0661444654928628	4.8828257359615	1.04576285812396e-06	0.00139919072722428	BORCS8
ENSG00000213626	5974.19246950828	-0.319127867997834	0.0662578403842247	-4.81645441727701	1.46131527655375e-06	0.00148666256621743	LBH
ENSG00000101417	331.983647984199	-0.235396057721365	0.0488620256430688	-4.81756649715885	1.45319667833235e-06	0.00148666256621743	PXMP4
ENSG00000112679	2754.55714684199	0.240780115897157	0.050010636852007	4.81457807885313	1.47511220958675e-06	0.00148666256621743	DUSP22
ENSG00000175592	12.7739230879388	2.26034798828031	0.470465676651095	4.8044907428106	1.55145878610781e-06	0.00148666256621743	FOSL1
ENSG00000134243	2652.83572217008	0.39979893508735	0.0836509872407095	4.77936899820333	1.75846203633325e-06	0.00159140814288159	SORT1
ENSG00000170989	3595.9254042458	-0.338042103220419	0.0726682505814722	-4.65185415247368	3.28963717375164e-06	0.00206108421386209	S1PR1
ENSG00000090470	665.372373660361	-0.190880766615543	0.0407643258395669	-4.68254442295398	2.83335758754975e-06	0.00206108421386209	PDCD7
ENSG00000129071	2883.07052888755	0.211326701730414	0.0454036555897294	4.65439839558242	3.24928013116843e-06	0.00206108421386209	MBD4
ENSG00000005302	4429.33063933798	0.236738354406839	0.0507253622730997	4.66706089021635	3.05538805693199e-06	0.00206108421386209	MSL3
ENSG00000213719	17623.6151579605	0.320930524194644	0.0686673066578838	4.67370193786096	2.95818560824193e-06	0.00206108421386209	CLIC1
ENSG00000135404	5960.51829898357	0.369219031226731	0.0788040719062268	4.68527859405647	2.79579379819303e-06	0.00206108421386209	CD63
ENSG00000111452	183.127624192357	0.650337672373714	0.139140331516514	4.67396954776212	2.95433156018007e-06	0.00206108421386209	ADGRD1
ENSG00000163221	7918.33715476376	0.823151954655144	0.174955212921141	4.70492956975321	2.53953609394952e-06	0.00206108421386209	S100A12
ENSG00000182944	8046.95095024236	0.150920818927978	0.0325715179104912	4.63352120532789	3.59497916162644e-06	0.00207190880701412	EWSR1
ENSG00000198563	5180.95948814416	0.269724799795312	0.058453199408751	4.61437188252405	3.94285899431785e-06	0.00207190880701412	DDX39B
ENSG00000100906	6350.9279683665	0.35694455442481	0.0772381955538131	4.62134766180705	3.81255240890221e-06	0.00207190880701412	NFKBIA
ENSG00000163958	41.1518444487694	0.969727320959537	0.20995610332523	4.61871460558302	3.86124498018704e-06	0.00207190880701412	ZDHHC19
ENSG00000118520	595.605698091751	1.16592821770844	0.251812469561914	4.63014488415463	3.65409961526455e-06	0.00207190880701412	ARG1
ENSG00000214212	3391.52210767171	0.467343351188051	0.101700634267137	4.59528452851613	4.32159163059383e-06	0.00213329477764768	C19orf38
ENSG00000279520	78.9443901169469	0.749208001743769	0.162827482006203	4.60123802513403	4.1998715139432e-06	0.00213329477764768	RP11-20I23.2
ENSG00000184898	598.121356070449	-0.396231543066515	0.086506749556293	-4.58035407755868	4.64189393317534e-06	0.0022240132991596	RBM43
ENSG00000268734	658.068111027768	0.709028935515481	0.155184150872085	4.568951993686	4.90169029106747e-06	0.00228138670975683	CTB-61M7.2
ENSG00000147894	6362.35988624037	0.339296339789956	0.0747058920974238	4.54176143626636	5.57861490294083e-06	0.00252432324358073	C9orf72
ENSG00000027869	606.497997014765	-0.49042310273245	0.108397961272151	-4.52428345493661	6.06004624963183e-06	0.00259784614227638	SH2D2A
ENSG00000121316	10835.3264756193	0.450589442376796	0.0995422287336157	4.52661597102287	5.99357140371855e-06	0.00259784614227638	PLBD1
ENSG00000107745	2033.58385761861	0.267958686692346	0.0594841717597677	4.50470568497654	6.64649942196342e-06	0.00266342136525816	MICU1
ENSG00000139278	13203.9396252693	0.321556121024309	0.0713056801954587	4.50954426271342	6.49670391116439e-06	0.00266342136525816	GLIPR1
ENSG00000110203	1519.37915737879	1.47803272234491	0.328240814339391	4.50289134615864	6.70351602060064e-06	0.00266342136525816	FOLR3
ENSG00000204282	1483.53061570432	-0.256116154775406	0.0569603910257274	-4.49639038923953	6.91167841399992e-06	0.0026807438420014	TNRC6C-AS1
ENSG00000140320	1330.64697679253	-0.190729953225204	0.0425501731017656	-4.48247185197209	7.37833773725738e-06	0.00276688970666051	BAHD1
ENSG00000144848	4550.95446522653	0.292246014751317	0.0652373081352961	4.47973748618239	7.47348969263736e-06	0.00276688970666051	ATG3
ENSG00000111229	9222.34574741622	0.317116467331863	0.0711826328132058	4.4549696295166	8.3905071417837e-06	0.0030373635853257	ARPC3
ENSG00000078246	173.472712883455	-0.26423404928218	0.0594388816362572	-4.44547478028253	8.76979690859939e-06	0.00310565199219748	TULP3
ENSG00000209082	161.290367360287	-0.563544109150017	0.127225867941764	-4.42947741891588	9.44617026675296e-06	0.00327400241798736	MT-TL1
ENSG00000096006	456.634069378738	1.48966686787612	0.33680678535922	4.42291228274194	9.73792847745426e-06	0.00330480947703604	CRISP3
ENSG00000090339	2262.15102980912	0.442430071366865	0.100266149611724	4.41255671111494	1.02157023701947e-05	0.00339619982878513	ICAM1
ENSG00000185862	36706.9047662671	0.323435599749442	0.0736819000650765	4.38962078154582	1.13548497929773e-05	0.00369941006255201	EVI2B
ENSG00000186431	1777.60866172441	0.654859396571674	0.14951664046254	4.37984290274195	1.18764898032256e-05	0.00379349056655971	FCAR
ENSG00000136026	3234.25502046502	0.518808760197181	0.118615873768519	4.37385607603959	1.2207087460923e-05	0.00382410489881607	CKAP4
ENSG00000240225	395.16633375072	-0.348211727054792	0.0799632518099471	-4.35464690558615	1.33281575019384e-05	0.00385749140418513	ZNF542P
ENSG00000183401	817.313157479799	0.29353736437743	0.0675099036595881	4.34806374272969	1.3734469087952e-05	0.00385749140418513	CCDC159
ENSG00000171314	363.623797032483	0.300816214523047	0.0690001071562926	4.35964851245327	1.30271518305208e-05	0.00385749140418513	PGAM1
ENSG00000100764	140.595669463274	0.354627326087847	0.0814843850878507	4.35208936909217	1.34846270666627e-05	0.00385749140418513	PSMC1
ENSG00000122862	76667.7299469537	0.355179656070688	0.0816315830861148	4.35100781637423	1.35513220816618e-05	0.00385749140418513	SRGN
ENSG00000267422	27.2602332519425	0.524294868176026	0.120556100810283	4.34897002019915	1.3677840693856e-05	0.00385749140418513	CTD-2554C21.1
ENSG00000158869	10443.065244486	0.427451003609048	0.0985193633910904	4.33875117434737	1.43294649858944e-05	0.00395638956983423	FCER1G
ENSG00000121552	3555.10552266318	0.522030568020029	0.120490015607485	4.33256287160445	1.47383555493585e-05	0.00400146353165084	CSTA
ENSG00000102144	16082.4555926403	0.231838689221468	0.0536034393653308	4.32507115152417	1.52482637698398e-05	0.00407203634115885	PGK1
ENSG00000070010	1642.91828817844	0.187929835476746	0.0434894465335684	4.32127448050387	1.55130553077331e-05	0.00407593017682213	UFD1L
ENSG00000139572	75.9944364361723	0.815294513906619	0.189550241828239	4.30120534821262	1.69871546295481e-05	0.00436864084328663	GPR84
ENSG00000229314	398.929495780091	1.34509552580967	0.312891720447258	4.29891696682465	1.71634753818505e-05	0.00436864084328663	ORM1
ENSG00000188322	681.849551946661	-0.417927863715906	0.0978683913470899	-4.27030482429946	1.95205984770221e-05	0.00445535470806523	SBK1
ENSG00000143458	983.058017310635	-0.310230047432781	0.0725217732765576	-4.27775043847503	1.88791504575023e-05	0.00445535470806523	GABPB2
ENSG00000112146	2480.37042088632	0.16503823403022	0.0386381209681712	4.27138354285326	1.9426396720004e-05	0.00445535470806523	FBXO9
ENSG00000150403	1458.67636595249	0.300394338066219	0.0701109702473929	4.28455542700736	1.83104957699025e-05	0.00445535470806523	TMCO3
ENSG00000163131	100809.785590668	0.318480348624822	0.0746315659410788	4.2673678973353	1.97792824776201e-05	0.00445535470806523	CTSS
ENSG00000159720	7738.80125390065	0.376582376931322	0.0880774807743005	4.27558070031906	1.90639727709033e-05	0.00445535470806523	ATP6V0D1
ENSG00000110446	2491.59647299962	0.393401443646509	0.0922335630344716	4.26527427439269	1.99656779428337e-05	0.00445535470806523	SLC15A3
ENSG00000072954	116.71582427058	0.40768772627709	0.0955729997332527	4.26572073090684	1.99257900994876e-05	0.00445535470806523	TMEM38A
ENSG00000269858	671.235619500101	0.421996128567008	0.0987631592580177	4.27280912981476	1.93025678236787e-05	0.00445535470806523	EGLN2
ENSG00000101421	4438.36990740969	0.273260651614025	0.0642267376601417	4.25462450015746	2.09400123112903e-05	0.00460963243987728	CHMP4B
ENSG00000139926	19.4144294557495	-0.705354001548631	0.16602858241492	-4.24838898995047	2.15313294409612e-05	0.0046328881192135	FRMD6
ENSG00000131236	29899.6760434685	0.224226131427288	0.0527898257877095	4.24752550480081	2.16144565414503e-05	0.0046328881192135	CAP1
ENSG00000143546	114989.725700444	0.572733681555859	0.135166596301935	4.23724275986419	2.26281438558425e-05	0.00478717484950227	S100A8
ENSG00000100902	87.7295567750539	0.446310669647288	0.105469804160128	4.23164405396719	2.31989338269303e-05	0.00484500810308583	PSMA6
ENSG00000107742	10889.2783578897	-0.303978689241072	0.0722592286537094	-4.20678015673044	2.59034907936315e-05	0.00514760178789263	SPOCK2
ENSG00000013563	1452.26041959759	0.248507863789284	0.0591413506428271	4.20193081639444	2.64648021193609e-05	0.00514760178789263	DNASE1L1
ENSG00000167552	8271.36053166927	0.411684923279635	0.097781975298924	4.2102332461693	2.55107175332392e-05	0.00514760178789263	TUBA1A
ENSG00000269929	128.197793709599	0.433478092667583	0.102869782747856	4.21385251420312	2.51051256115412e-05	0.00514760178789263	RP11-2B6.2
ENSG00000254419	22.923686116431	0.633035000970752	0.150677553403528	4.20125617035621	2.65438029578257e-05	0.00514760178789263	RP11-261P9.4
ENSG00000102010	318.393159342698	0.781548737147488	0.185938292846457	4.20326940289202	2.63087155456272e-05	0.00514760178789263	BMX
ENSG00000211858	18.0014680267704	-0.957928472630464	0.228768770133291	-4.1873218624742	2.82265405226103e-05	0.00517000269834831	TRAJ31
ENSG00000143119	27746.0476627583	0.181968061730373	0.0434096244715212	4.19188288186537	2.76648810847337e-05	0.00517000269834831	CD53
ENSG00000163719	3423.32645511994	0.215184856594859	0.0513357874752188	4.19171239359548	2.76856830345728e-05	0.00517000269834831	MTMR14
ENSG00000167604	549.078174018232	0.461530867967007	0.110088088205825	4.1923778992702	2.76045662304536e-05	0.00517000269834831	NFKBID
ENSG00000164047	1230.87586412622	1.17462457125945	0.280529872379194	4.18716395975009	2.82461780327195e-05	0.00517000269834831	CAMP
ENSG00000182253	186.601484355667	-0.725714535320201	0.1735894443837	-4.18063746846318	2.90693008182624e-05	0.0052615434481055	SYNM
ENSG00000135218	8786.36280886897	0.420880508539761	0.100961463588199	4.16872431897825	3.06309205567039e-05	0.00548327138317259	CD36
ENSG00000119655	3363.72863968276	0.338746207497036	0.0815757912899579	4.15253351687361	3.28814576309608e-05	0.00552205097740569	NPC2
ENSG00000085871	453.005330189397	0.344584188989133	0.0829548085130141	4.15387842086422	3.26886904493011e-05	0.00552205097740569	MGST2
ENSG00000165030	3217.87118286088	0.400738163329818	0.09649147920648	4.15309379258543	3.28010215761583e-05	0.00552205097740569	NFIL3
ENSG00000252965	39.0535388888882	0.564086133488093	0.13572340009229	4.15614502071509	3.23662423043659e-05	0.00552205097740569	Y_RNA
ENSG00000183087	166.219254600156	0.591682738024588	0.142187201350272	4.16129393085812	3.16449471398445e-05	0.00552205097740569	GAS6
ENSG00000216490	139.059102522346	0.593229657123093	0.142656824095349	4.15843869289133	3.20430204034893e-05	0.00552205097740569	IFI30
ENSG00000163156	1510.52650737591	0.247972580266378	0.0598565044783649	4.14278418740619	3.43114793452022e-05	0.00566926796460539	SCNM1
ENSG00000243696	57.6753481255125	0.453976960962247	0.109607740936785	4.14183302276133	3.44541147020217e-05	0.00566926796460539	RP5-966M1.6
ENSG00000112367	1423.56576092098	0.195724527179176	0.0473000984500467	4.13793065115666	3.50452252815293e-05	0.00570886719836113	FIG4
ENSG00000230551	777.285942628786	0.324625910851384	0.0785690574414576	4.13172718908159	3.60047589953964e-05	0.00580710419836641	CTB-89H12.4
ENSG00000168894	1382.71856325045	0.25320045006825	0.061418060528285	4.12257319574008	3.74663502829858e-05	0.0058309506848533	RNF181
ENSG00000204482	17501.9674792328	0.380606622000654	0.0923234652286252	4.12253397398093	3.74727322194382e-05	0.0058309506848533	LST1
ENSG00000254554	15.4673826864736	0.713965964421249	0.173214984345987	4.12184873679948	3.75843966795333e-05	0.0058309506848533	RP11-351I24.1
ENSG00000185883	18.16115553215	0.718432967683995	0.174030293602878	4.12820637608873	3.65603912222117e-05	0.0058309506848533	ATP6V0C
ENSG00000159352	3052.80165009689	0.222895675994768	0.0541130686608439	4.11907292472687	3.80399755938208e-05	0.0058438595980426	PSMD4
ENSG00000172936	11953.9822823939	0.273150084627658	0.0663470177596166	4.1169911452134	3.83850814604394e-05	0.0058438595980426	MYD88
ENSG00000137462	15784.2201948014	0.386969289181616	0.0940802924004835	4.11318119138442	3.90243846564058e-05	0.00588617801900787	TLR2
ENSG00000112799	1467.74375851033	0.3763024937991	0.0916139506545623	4.10748025939825	3.99998952909237e-05	0.00597796600265273	LY86
ENSG00000078687	1260.0807406991	-0.348083101298384	0.0851966883233282	-4.08564121620996	4.39552564972055e-05	0.00602894174652531	TNRC6C
ENSG00000119661	237.300880749522	-0.261011867745405	0.0637095433833002	-4.09690375859486	4.1871287579962e-05	0.00602894174652531	DNAL1
ENSG00000176915	2485.22607529539	0.1070881642135	0.0261237160147055	4.09926995658727	4.14455388280042e-05	0.00602894174652531	ANKLE2
ENSG00000115091	19615.7514305526	0.180043086719743	0.0440001977927842	4.09186994039533	4.27908636715539e-05	0.00602894174652531	ACTR3
ENSG00000168288	2929.70328465769	0.192704305219867	0.04703815202465	4.09676607020789	4.18961891000009e-05	0.00602894174652531	MMADHC
ENSG00000093144	2226.10675430292	0.193677372277304	0.0473342395685037	4.09169713177726	4.28227699376886e-05	0.00602894174652531	ECHDC1
ENSG00000169826	4112.84975904973	0.224201883243211	0.0547461028066085	4.0953030763707	4.21616469070361e-05	0.00602894174652531	CSGALNACT2
ENSG00000060971	3777.78269317081	0.257632935321124	0.063011304590874	4.08867800776239	4.3383856239535e-05	0.00602894174652531	ACAA1
ENSG00000149573	419.165575017174	0.420851000838563	0.10301887270032	4.08518351839097	4.40419931145802e-05	0.00602894174652531	MPZL2
ENSG00000049247	77.0294945453021	1.51990757070905	0.371675003617874	4.089345680808	4.32591758114926e-05	0.00602894174652531	UTS2
ENSG00000177628	1180.8596343665	0.36488674106893	0.089487598783407	4.07751181202314	4.55202180558632e-05	0.00617936960108343	GBA
ENSG00000248712	149.923313929318	0.589603653012967	0.144964306128248	4.06723329873598	4.75746082048811e-05	0.00640487907154969	CCDC153
ENSG00000197461	26.8262388864517	-0.646728143053112	0.159369949828377	-4.05803066230217	4.94882714700913e-05	0.00660420075658735	PDGFA
ENSG00000197405	19144.768256326	0.410054971989766	0.101092028426186	4.0562542702284	4.98659725635509e-05	0.00660420075658735	C5AR1
ENSG00000067560	25740.3012513889	0.214553601681404	0.053080292345015	4.04205764894499	5.29842015724834e-05	0.00676273404816083	RHOA
ENSG00000113732	7623.54027505823	0.246213641441012	0.0609533875894104	4.03937584403901	5.35936278134773e-05	0.00676273404816083	ATP6V0E1
ENSG00000023318	3147.08115087547	0.249704213668783	0.0618267113619215	4.03877560634049	5.37309353964239e-05	0.00676273404816083	ERP44
ENSG00000130830	4320.86457706459	0.307116503734611	0.0760615190447616	4.03773823599126	5.39690255531558e-05	0.00676273404816083	MPP1
ENSG00000198833	5818.10958940617	0.332520468367471	0.0822181898222509	4.0443662051713	5.24648590723389e-05	0.00676273404816083	UBE2J1
ENSG00000169084	451.271090932188	0.362111877088644	0.0896058160718973	4.04116488150831	5.31863454570564e-05	0.00676273404816083	DHRSX
ENSG00000226091	188.863626306391	0.590260354169109	0.146065430829704	4.04106810773923	5.32083011979105e-05	0.00676273404816083	LINC00937
ENSG00000161405	4624.64216080016	-0.353893404305438	0.0877948085967441	-4.03091492494651	5.55601531179067e-05	0.00690896865870763	IKZF3
ENSG00000033627	2030.60463270898	0.30367225515002	0.0754495578894825	4.02483809904937	5.70145266644677e-05	0.0069695726990435	ATP6V0A1
ENSG00000105518	882.031145350446	0.315264307533314	0.0783333648763264	4.02464911383619	5.70603297828143e-05	0.0069695726990435	TMEM205
ENSG00000102882	3199.45820155575	0.367284460861262	0.0912840216040712	4.02353505473603	5.73310461431448e-05	0.0069695726990435	MAPK3
ENSG00000138964	9477.61392960337	0.240451379730517	0.0598653520314828	4.01653663715308	5.9059685893437e-05	0.0071265354311414	PARVG
ENSG00000183161	654.6667652146	-0.252594826347704	0.0630732601787918	-4.00478468421771	6.20739951446314e-05	0.00737013343071201	FANCF
ENSG00000103264	595.3490573055	-0.235966765365619	0.0589665851339733	-4.00170308030384	6.28881858114776e-05	0.00737013343071201	FBXO31
ENSG00000143549	13542.3459068094	0.165445702620886	0.0413026538259541	4.005691821113	6.18362281731837e-05	0.00737013343071201	TPM3
ENSG00000177156	19859.9579663455	0.377768215774484	0.0943780940248596	4.00271079510229	6.26208314844303e-05	0.00737013343071201	TALDO1
ENSG00000137767	1981.55145362457	0.324242878451063	0.0812006257203129	3.99310812662804	6.52128125939377e-05	0.00758797655110889	SQRDL
ENSG00000140022	107.370538915628	-0.389030693061071	0.0975566139434502	-3.98774288421467	6.67048991712045e-05	0.00764699088977791	STON2
ENSG00000100612	4449.23698772458	0.304756366353486	0.0764170079288011	3.98806986315706	6.66130487734106e-05	0.00764699088977791	DHRS7
ENSG00000012223	4439.90928378664	1.5648888050831	0.392572535855805	3.98624117112945	6.71282809845452e-05	0.00764699088977791	LTF
ENSG00000112294	376.297034713433	-0.341857081010839	0.0858312311728236	-3.98289848974087	6.80798393834241e-05	0.00770153183024985	ALDH5A1
ENSG00000283646	32.8916510199826	1.38046126340397	0.346941728881344	3.97894271137415	6.92224167755526e-05	0.00777678047775001	RP11-24F11.5
ENSG00000136048	827.293858364091	0.248270544237795	0.0624443131720711	3.97587116626078	7.01220820543713e-05	0.00781802013244886	DRAM1
ENSG00000132170	15.1183172371964	0.868187782018208	0.218443594257062	3.97442545738619	7.05493529447503e-05	0.00781802013244886	PPARG
ENSG00000130338	487.78676118936	-0.293290973540594	0.0739399229819555	-3.96661183447769	7.29015764759373e-05	0.00783108661240006	TULP4
ENSG00000174282	2723.47888399395	-0.201871312864961	0.0508758283251426	-3.9679218896412	7.25020874370302e-05	0.00783108661240006	ZBTB4
ENSG00000144744	3830.34299062352	0.185353803388691	0.0467350141006563	3.96605857418769	7.30709125282264e-05	0.00783108661240006	UBA3
ENSG00000196189	5445.81403278774	0.40513628724441	0.102083224087002	3.96868624465786	7.22699619626333e-05	0.00783108661240006	SEMA4A
ENSG00000154447	119.601364076361	0.541898405281523	0.136468269383365	3.97087475154557	7.16092202083689e-05	0.00783108661240006	SH3RF1
ENSG00000163931	26480.0639169436	0.351973872191333	0.0887884300519478	3.96418623446098	7.36467424570688e-05	0.00783862613311985	TKT
ENSG00000175806	431.06070877902	0.446228726075502	0.112606948270994	3.96271040932243	7.4103647912858e-05	0.00783862613311985	MSRA
ENSG00000234390	29.1188032474769	-0.391040978635716	0.0987816393000981	-3.95864030407246	7.53776564807484e-05	0.00789242812848729	USP27X-AS1
ENSG00000129219	648.867419556607	0.286492339987185	0.0723831831295685	3.95799587142159	7.55812638455505e-05	0.00789242812848729	PLD2
ENSG00000104687	2112.21608686654	0.181869190616174	0.045970092896373	3.95625023047373	7.61354116465333e-05	0.00789965513198744	GSR
ENSG00000120533	1923.13557836004	0.221521945365319	0.0560639471261361	3.95123705555239	7.77482640366895e-05	0.00801594443770679	ENY2
ENSG00000166133	226.009839182054	-0.220250040425116	0.0558113706980103	-3.94632917397543	7.93584938765876e-05	0.00802950226863113	RPUSD2
ENSG00000164032	4687.46240182864	0.266924009156456	0.0676260303486937	3.94706014503795	7.91166871501512e-05	0.00802950226863113	H2AFZ
ENSG00000008438	1186.37915357769	0.922351453527932	0.233595809940809	3.94849314190031	7.86446686409859e-05	0.00802950226863113	PGLYRP1
ENSG00000148719	2056.75384591004	0.222116938026279	0.0563271985538957	3.94333365991477	8.03567332014448e-05	0.0080555665880925	DNAJB12
ENSG00000090487	4123.6089197087	0.224048244674749	0.0568276260099015	3.94259377711311	8.06051168728715e-05	0.0080555665880925	SPG21
ENSG00000242951	16.099082819165	-1.74600943963951	0.443586761612837	-3.93611710433195	8.28105757092371e-05	0.00817566229274832	RP11-507E23.1
ENSG00000170915	1210.99269355799	-0.299104407943216	0.0759813148925997	-3.93655214266828	8.26606660166689e-05	0.00817566229274832	PAQR8
ENSG00000136167	120185.786446536	0.211369923707452	0.0537766148921271	3.93051745877736	8.47632379942893e-05	0.00831598595499566	LCP1
ENSG00000225808	15.1502229408326	0.8758992693734	0.222924345963426	3.92913239506421	8.52528946890285e-05	0.00831598595499566	DNAJC19P5
ENSG00000180539	624.828954811915	0.474057862413298	0.120872710136195	3.92195940571819	8.78317922410435e-05	0.00851654699765833	C9orf139
ENSG00000166167	606.865267262067	-0.19574961935136	0.0499791629612977	-3.91662460419639	8.97974122600562e-05	0.0085405132527016	BTRC
ENSG00000182446	3337.16204179466	0.142368512758176	0.0363786302219158	3.91352043465363	9.09601989978634e-05	0.0085405132527016	NPLOC4
ENSG00000105700	2172.54764571843	0.194324347187333	0.0496590453218252	3.91317122445621	9.1091895524356e-05	0.0085405132527016	KXD1
ENSG00000204397	3040.52351916136	0.346566818278718	0.0885721403319174	3.91281973067361	9.12246351117298e-05	0.0085405132527016	CARD16
ENSG00000279861	111.569203448538	0.507849919072632	0.129739738118815	3.91437447335946	9.06388754538207e-05	0.0085405132527016	RP11-43N16.4
ENSG00000104918	230.326591333517	0.840397779526077	0.21444370426269	3.91896690283154	8.89293239299335e-05	0.0085405132527016	RETN
ENSG00000172243	14798.8718638064	0.363188506044507	0.0930653170146904	3.90251188836737	9.51995608073621e-05	0.00881136844063596	CLEC7A
ENSG00000250254	28.5070512880029	0.552365865793545	0.141533234132245	3.90272905992827	9.51141537858869e-05	0.00881136844063596	PTTG2
ENSG00000163466	26724.0823293071	0.198549672503772	0.0509043454787035	3.90044642822955	9.60154715382659e-05	0.00883667814326752	ARPC2
ENSG00000272632	51.2638982351405	0.674316335590433	0.173439755062871	3.88789949193597	0.000101115478114811	0.00925377044095661	RP11-362F19.3
ENSG00000270696	111.780705379514	-0.338745202012843	0.0873313254921726	-3.87885103201834	0.000104950997338933	0.00955112707626375	RP11-342K6.1
ENSG00000167565	965.887638458663	0.283847180547103	0.073283867992209	3.87325598830672	0.000107390923960616	0.00968958467407567	SERTAD3
ENSG00000205155	917.394039804646	0.333799004117896	0.0861941360701106	3.8726416823342	0.000107662051934174	0.00968958467407567	PSENEN
ENSG00000185730	102.101359313843	-0.367710271331534	0.0951624398225038	-3.86402736223855	0.000111532719769319	0.00971036804064034	ZNF696
ENSG00000101096	1998.47839590785	-0.349280021337051	0.0903348901104717	-3.86650186777126	0.000110407618777375	0.00971036804064034	NFATC2
ENSG00000164088	4410.83769373978	0.229282548784653	0.0592767937189911	3.86799849316404	0.000109732342866563	0.00971036804064034	PPM1M
ENSG00000006007	2952.5993433166	0.236449239059786	0.0611023012849337	3.86972722937505	0.00010895718891819	0.00971036804064034	GDE1
ENSG00000152422	519.15881546485	0.273005721600992	0.0706981553452541	3.86156781980761	0.000112661728648313	0.00971036804064034	XRCC4
ENSG00000184014	10964.7127509938	0.287533728513192	0.0744550241845873	3.86184453852764	0.000112534169750352	0.00971036804064034	DENND5A
ENSG00000141447	376.097074707405	0.297239313726879	0.0769231612352395	3.86410684316377	0.000111496414107521	0.00971036804064034	OSBPL1A
ENSG00000144802	4388.22179632529	0.364317587200507	0.0942208060784996	3.86663628091844	0.000110346811834283	0.00971036804064034	NFKBIZ
ENSG00000235192	88.850222672317	0.416941241011997	0.108021230543729	3.85980828873461	0.000113476015100188	0.0097290751893793	AC009495.2
ENSG00000163041	769.335385932173	0.352529377306523	0.0915382530850455	3.85117003466297	0.000117554841022241	0.0100260123573419	H3F3A
ENSG00000198934	208.865069284768	-0.350017203529362	0.0909679028778734	-3.84770003986207	0.000119231912159896	0.0101160825473162	MAGEE1
ENSG00000118113	683.47399858303	1.48360553752864	0.38618437023656	3.84170269920516	0.000122183774925866	0.0103128170649863	MMP8
ENSG00000162408	590.647740044098	-0.20557040837452	0.0535370991864878	-3.83977487570719	0.000123147181736294	0.0103405545901249	NOL9
ENSG00000136560	4412.7403175468	0.219733444415669	0.05724558156471	3.83843500947378	0.000123820977225275	0.0103438139435884	TANK
ENSG00000244682	850.830669535882	0.71052206343535	0.185221096109473	3.83607525470751	0.000125016114839788	0.0103903699527558	FCGR2C
ENSG00000071575	2734.19676389512	-0.347840594110136	0.0907324679835953	-3.83369483758589	0.000126232728410331	0.0103977714652137	TRIB2
ENSG00000102804	1370.86533004998	-0.312784950912101	0.0817253767861328	-3.82726838605624	0.000129573211015247	0.0103977714652137	TSC22D1
ENSG00000168758	654.244607867534	-0.296243228899898	0.0773926639349332	-3.82779470091584	0.000129296530116589	0.0103977714652137	SEMA4C
ENSG00000141378	562.801546765319	0.179559754927194	0.0469075730766719	3.8279480934496	0.000129215997325913	0.0103977714652137	PTRH2
ENSG00000126860	6002.54073356463	0.315837352350461	0.0824820988687043	3.8291624083574	0.000128580134761866	0.0103977714652137	EVI2A
ENSG00000042493	3845.9454898235	0.442974774951344	0.115571661717294	3.83290132173516	0.000126640762497271	0.0103977714652137	CAPG
ENSG00000163220	234783.814430285	0.505080875838696	0.131808611970163	3.83192621702918	0.000127143873926428	0.0103977714652137	S100A9
ENSG00000277791	4170.75104202802	0.297044887153614	0.0778003566721593	3.8180401717864	0.000134516025582778	0.0107415002781542	PSMB3
ENSG00000068615	10.3002064494749	-1.43901887922785	0.377081886739106	-3.81619730311647	0.000135524149943761	0.0107444681951934	REEP1
ENSG00000170266	2391.81703075756	0.242772229843244	0.063626830120043	3.81556380201893	0.000135872341817669	0.0107444681951934	GLB1
ENSG00000168528	98.6871281860464	0.652753494131029	0.171439753507366	3.8074803584163	0.000140389885632999	0.0110480736085099	SERINC2
ENSG00000198695	2019.33961521151	-0.598167728384563	0.157223943177605	-3.80455874782924	0.000142057195281425	0.0110723048379637	MT-ND6
ENSG00000137409	4809.99812307182	0.190101880897823	0.0499646735156238	3.80472576966562	0.00014196137856678	0.0110723048379637	MTCH1
ENSG00000124160	1256.99542475018	-0.143159015990854	0.0376455995528745	-3.80280876626185	0.00014306478981272	0.0110977401240438	NCOA5
ENSG00000117862	2923.86938087537	0.23603738912521	0.0621005614604811	3.80088977577791	0.000144177430635233	0.0111310442893268	TXNDC12
ENSG00000181873	253.260566660906	-0.236453617287051	0.062293507460843	-3.79579874252036	0.000147168855086682	0.0111827320649807	IBA57
ENSG00000219200	165.519912605273	0.349691919391756	0.0920619657643234	3.79844071858035	0.000145609244993956	0.0111827320649807	RNASEK
ENSG00000011422	3457.20866689073	0.406516967128186	0.107066229390509	3.79687385501803	0.000146532306652481	0.0111827320649807	PLAUR
ENSG00000115718	35.8619434677721	0.639552959887533	0.168521376598966	3.79508506751337	0.000147592841864386	0.0111827320649807	PROC
ENSG00000165457	132.40704085666	0.48066859114585	0.126975227863437	3.78553044742564	0.000153381052134487	0.0115674876818092	FOLR2
ENSG00000011295	861.431612396842	-0.210304423203569	0.055623323918973	-3.78086759989248	0.000156282775662057	0.0117320111314973	TTC19
ENSG00000085265	45933.0590548897	0.422052974660482	0.111736470588958	3.77721770193618	0.000158590100626946	0.0118506088954722	FCN1
ENSG00000270120	44.8018278217802	0.71517688995406	0.189412638294347	3.77576119732136	0.000159519764934928	0.0118656482684474	RP11-327F22.6
ENSG00000111640	29401.4480424057	0.286686004098759	0.0760749835096814	3.76846620101173	0.000164253720173547	0.0121622413710322	GAPDH
ENSG00000051620	3454.07364655708	0.291862943824329	0.0775379146768033	3.76413197389799	0.000167128606523659	0.0123191176482823	HEBP2
ENSG00000141569	674.132505487366	-0.169340778398638	0.0450292392456615	-3.76068486244644	0.000169448795197205	0.0124338778097409	TRIM65
ENSG00000134996	5916.25273238847	0.241027025190082	0.0642302812011973	3.75254507192769	0.000175048347022749	0.0127871640044869	OSTF1
ENSG00000159128	8255.87338211681	0.331632810445827	0.0884177437217852	3.75074952703319	0.000176306752582845	0.0128215937481007	IFNGR2
ENSG00000102854	13.2801522022374	2.15210731427325	0.574209595864397	3.74794731710036	0.000178287689198621	0.0129080286979801	MSLN
ENSG00000111412	1346.67183832528	-0.159005368356899	0.0424466954539598	-3.7460011116617	0.000179675794397041	0.0129509676580876	C12orf49
ENSG00000163812	2122.79369517799	0.177194512575807	0.0473227290562404	3.74438490994933	0.000180836245457012	0.0129771913590076	ZDHHC3
ENSG00000139173	57.2190536595178	-0.377248590482762	0.100784960147407	-3.74310402991678	0.000181760933226585	0.0129863403607942	TMEM117
ENSG00000168374	2666.60098974836	0.187696059869153	0.0501765544646085	3.74071240785459	0.000183499394312676	0.0130532975255611	ARF4
ENSG00000137509	4856.8162304549	0.235627087128556	0.0630458736269953	3.73739110227294	0.000185939579254153	0.0130666751461763	PRCP
ENSG00000230956	67.6861107879511	0.353503374859831	0.0945908777203315	3.73718252097208	0.000186093838791461	0.0130666751461763	RP3-452M16.1
ENSG00000109743	3375.96549298003	0.38470389771621	0.102922692016473	3.73779474845682	0.000185641397775987	0.0130666751461763	BST1
ENSG00000188818	31.9923502751948	-0.645574691892326	0.17280681301018	-3.73581735955223	0.000187106439225293	0.0130813901072104	ZDHHC11
ENSG00000070190	5722.00607453124	0.270708044207001	0.0724966879808582	3.73407464184403	0.000188406616404646	0.0131159990650927	DAPP1
ENSG00000064309	20.6526316854318	-0.601375079523873	0.161265010365023	-3.72911072378727	0.000192156709182629	0.013320139542915	CDON
ENSG00000197548	1775.94579262741	0.243657977366568	0.0653937604894744	3.72601262785287	0.000194532662533414	0.0134276994604632	ATG7
ENSG00000111679	19282.1534654942	0.235493028656454	0.0632617559761094	3.72251805254011	0.000197245801265807	0.0135005634563865	PTPN6
ENSG00000135838	4770.0602931173	0.34309529910709	0.0921585334136829	3.72288149993661	0.000196961977995245	0.0135005634563865	NPL
ENSG00000198734	2726.44059600319	0.474567225582718	0.127554204330749	3.72051417726821	0.000198817579986573	0.0135512066024321	F5
ENSG00000079739	1097.48562470019	0.267876545587644	0.0721019379688699	3.71524751114595	0.000203004884899253	0.0137789565625368	PGM1
ENSG00000180891	821.270700364391	0.37802064658315	0.101846744770041	3.71166155027025	0.000205903186666717	0.0138031395506206	CUEDC1
ENSG00000262877	53.0338059646762	0.737132682596081	0.198584574184771	3.71193324366788	0.000205682240689763	0.0138031395506206	RP11-1055B8.4
ENSG00000197403	14.5625331130185	1.00716700641897	0.271287863451133	3.71253985934534	0.000205189733305042	0.0138031395506206	OR6N1
ENSG00000065882	3891.32863218728	0.222518114289371	0.0599930656935835	3.70906390124967	0.000208026926380515	0.0138883550440106	TBC1D1
ENSG00000124203	1297.31506771205	-0.328377519746638	0.088577850047927	-3.70721935076277	0.000209547433915774	0.0139327661162774	ZNF831
ENSG00000041353	685.105376686154	-0.43440074927761	0.117325297904764	-3.70253267654367	0.000213457857275203	0.0140405420644432	RAB27B
ENSG00000254635	992.410027585737	0.237078953575916	0.0640047987330149	3.70408091688328	0.000212158533959979	0.0140405420644432	WAC-AS1
ENSG00000133742	34.0423298725708	1.0510825021827	0.283909005996766	3.70218091001551	0.000213754108777281	0.0140405420644432	CA1
ENSG00000143393	3349.54868271667	0.15015642306209	0.0405827926046206	3.70000222816094	0.000215597574004964	0.0141047569499633	PI4KB
ENSG00000162444	1155.47547962054	0.460599265569313	0.124604734798404	3.69648285287482	0.000218607017038035	0.0142444332301983	RBP7
ENSG00000198948	526.416049630843	-0.4487266836269	0.121585066716616	-3.69063977793232	0.000223690728029598	0.0143461494472526	MFAP3L
ENSG00000185989	5341.47724435043	-0.172756939893316	0.0468061742501853	-3.69090066985408	0.000223461394416764	0.0143461494472526	RASA3
ENSG00000110934	18391.2445899611	0.194816409806395	0.0527498065524367	3.69321562559164	0.000221436109012034	0.0143461494472526	BIN2
ENSG00000109113	371.588293000284	0.355138475132868	0.096226174823824	3.69066395690231	0.000223669464538482	0.0143461494472526	RAB34
ENSG00000198851	8021.98777006216	-0.277137450684661	0.0751465221307194	-3.68796110354346	0.000226058195644012	0.0143847187775037	CD3E
ENSG00000185000	1694.05575865426	0.324062218783067	0.087857973635084	3.68847818103626	0.00022559936794577	0.0143847187775037	DGAT1
ENSG00000118680	8853.48634972762	0.199650592192444	0.0541805608272116	3.6849118788038	0.00022878178105087	0.0144919080407811	MYL12B
ENSG00000082014	908.501397349024	0.335842601814801	0.0911846766515786	3.68310350101994	0.000230411552029607	0.0144919080407811	SMARCD3
ENSG00000148346	1175.60494639078	1.26488506016483	0.343428858458337	3.68310649793072	0.000230408842121506	0.0144919080407811	LCN2
ENSG00000196954	13557.7149189808	0.28753367507625	0.0781227377501619	3.68053761756006	0.000232742718803119	0.0145822264973185	CASP4
ENSG00000088970	879.614553853646	0.147978314188173	0.0402265354406878	3.67862438480094	0.000234495321646576	0.0145997998988356	KIZ
ENSG00000239653	211.664781439299	0.392310517808007	0.106656081943702	3.67827610632732	0.000234815688980659	0.0145997998988356	PSMD6-AS2
ENSG00000068001	301.130110275652	0.332529068749901	0.0904803268932214	3.67515326444751	0.000237706673245643	0.014723352498751	HYAL2
ENSG00000166797	1611.05212704612	0.194088092267608	0.0528540836963718	3.67214941011136	0.000240518987698643	0.0148411148091322	FAM96A
ENSG00000151023	279.803274391935	-0.600604203145745	0.163861195065967	-3.66532297597338	0.000247026634658227	0.0149506414872892	ENKUR
ENSG00000183283	26121.1347019121	0.211280502100955	0.057609396802165	3.66746596612541	0.000244966143831954	0.0149506414872892	DAZAP2
ENSG00000125734	2555.22416470099	0.25783808510505	0.0703349142107993	3.66586194066135	0.000246506893925454	0.0149506414872892	GPR108
ENSG00000026025	38407.6500543426	0.293882578334305	0.0801582117885793	3.66628161702799	0.000246102897216227	0.0149506414872892	VIM
ENSG00000214530	623.222876027657	0.410856065761878	0.112074447744885	3.66592094834239	0.0002464500532885	0.0149506414872892	STARD10
ENSG00000224505	43.7145984360378	0.420342277011757	0.114705887170407	3.66452226107016	0.000247800687634627	0.0149506414872892	AC002117.1
ENSG00000213160	31.8605631711874	-0.463008225283435	0.126615000072445	-3.65681968975647	0.000255363875644948	0.0153501016024214	KLHL23
ENSG00000186575	578.514269432836	-0.19103856562984	0.0522738858177771	-3.65456982279425	0.000257613550158527	0.0153575630385166	NF2
ENSG00000137404	466.520513149082	0.252659258371044	0.0691547767284667	3.6535329925668	0.000258656535201342	0.0153575630385166	NRM
ENSG00000132965	8785.82297532013	0.406135351003661	0.111179876155651	3.65295739702997	0.000259237255420964	0.0153575630385166	ALOX5AP
ENSG00000249476	79.1919023406003	0.450862015614756	0.123424565163638	3.65293582373165	0.000259259044542177	0.0153575630385166	CTD-2587M2.1
ENSG00000253719	4136.44986844218	-0.110301842037397	0.0302234076246553	-3.64955015685977	0.000262699944400413	0.0153600173014978	ATXN7L3B
ENSG00000100991	4630.45419147524	0.18395686942017	0.0504103782808527	3.64918645115668	0.000263072119528415	0.0153600173014978	TRPC4AP
ENSG00000197006	5278.62867374067	0.235836516735814	0.0646106222206415	3.65011988168828	0.000262117944808648	0.0153600173014978	METTL9
ENSG00000092841	30992.3649099082	0.258806894361639	0.0709148324476529	3.64954531271976	0.000262704898098176	0.0153600173014978	MYL6
ENSG00000154310	1064.89377392909	-0.286340061323257	0.0784934858483708	-3.64794681021547	0.000264344344431052	0.0153791763242209	TNIK
ENSG00000198786	106520.974920053	-0.384416934205908	0.10544547905444	-3.64564642934989	0.000266720487343655	0.0154621948001001	MT-ND5
ENSG00000157429	74.1451751858757	-0.305524698879491	0.0839306352220345	-3.64020477232467	0.000272421302727614	0.0157366773809675	ZNF19
ENSG00000181894	426.625347528683	-0.210562634300348	0.0578931299690756	-3.63709190387224	0.000275733569024733	0.0157835829394852	ZNF329
ENSG00000131475	1116.44676158835	0.16389779392403	0.0450669864212479	3.63675956479655	0.000276089417619259	0.0157835829394852	VPS25
ENSG00000163563	84033.5694221227	0.370608738547883	0.101907631214167	3.636712325979	0.000276140033011251	0.0157835829394852	MNDA
ENSG00000101082	1360.5169458524	-0.265924015723319	0.0732607437158512	-3.62982959543423	0.00028360838625822	0.0159556494909237	SLA2
ENSG00000027075	3575.29040500385	-0.243000571965377	0.0668894254602852	-3.63286977415668	0.000280286493737387	0.0159556494909237	PRKCH
ENSG00000163348	1915.2730411346	-0.165801551734589	0.0456696472583117	-3.6304539598653	0.000282923170555437	0.0159556494909237	PYGO2
ENSG00000273033	780.116762391712	0.22582987569317	0.0622370982100607	3.62854121075755	0.000285027256099373	0.0159556494909237	RP11-67L2.2
ENSG00000196118	151.133552750075	0.383904479133395	0.105797201789243	3.62868273111952	0.000284871078295557	0.0159556494909237	CCDC189
ENSG00000151012	67.355420216794	0.585998842807968	0.161403864254204	3.63063700807711	0.000282722576496545	0.0159556494909237	SLC7A11
ENSG00000138279	4195.90619329672	0.117272656095983	0.0323436647062271	3.62583081296303	0.000288033898205885	0.0160687404170338	ANXA7
ENSG00000260302	57.4932753016659	-0.625941563177824	0.172677125299779	-3.62492462213017	0.000289045745011517	0.016070154219241	RP11-973H7.1
ENSG00000273226	54.2789795499272	-0.44662065688139	0.123282128787903	-3.62275263472912	0.000291484544023843	0.0160958753293166	RP11-513M16.8
ENSG00000101298	296.998717160963	-0.397629608267035	0.109756344471422	-3.62283939194575	0.000291386760894828	0.0160958753293166	SNPH
ENSG00000049245	3843.77892720901	0.228672451791955	0.0631411840549539	3.62160537871659	0.000292780498184907	0.0161128186332167	VAMP3
ENSG00000160746	683.817763521277	0.303202926655572	0.0837771530867857	3.61916006314371	0.000295560789197672	0.0161386643109091	ANO10
ENSG00000101474	7631.03711110124	0.390999219087622	0.108053175904925	3.61858146059177	0.000296222260832525	0.0161386643109091	APMAP
ENSG00000132522	113.157482225991	0.397013796822569	0.109707601508962	3.61883580865759	0.0002959313137119	0.0161386643109091	GPS2
ENSG00000196998	2124.63414143977	0.187648240729492	0.0519056242351302	3.61518127360253	0.000300137532668468	0.0162433236118583	WDR45
ENSG00000161944	747.980007216479	0.506901140895874	0.140210903598944	3.61527618669231	0.000300027587016175	0.0162433236118583	ASGR2
ENSG00000179388	459.752249102166	1.86741699357851	0.51689656864539	3.61274790133038	0.000302969226172096	0.0163422804448458	EGR3
ENSG00000157570	678.551460966295	-0.284088047585872	0.0786874945864345	-3.6103328626611	0.000305804306260763	0.0163576296245885	TSPAN18
ENSG00000089050	412.792336522139	-0.187456758111387	0.0519279233607855	-3.60994135677202	0.000306266239134407	0.0163576296245885	RBBP9
ENSG00000145491	252.718135947565	0.491501846224641	0.13614412509203	3.61015832223679	0.000306010163660632	0.0163576296245885	ROPN1L
ENSG00000164221	434.11803031341	0.216667117899137	0.0601255300059534	3.60357934271321	0.00031386487751981	0.0167086890679664	CCDC112
ENSG00000011243	2115.11964290722	0.232969172448417	0.0646982541348517	3.60085717248004	0.000317169786319766	0.0168296280754038	AKAP8L
ENSG00000169299	2428.10137080055	0.259103409560141	0.0719780014750436	3.59975831851872	0.0003185130797474	0.0168460326918349	PGM2
ENSG00000198821	6070.65066888659	-0.30759897693122	0.0855773547536046	-3.59439688007257	0.000325143889317899	0.0171169824793749	CD247
ENSG00000105088	216.981592119805	-0.299632729555353	0.0834043747324447	-3.59253013425919	0.000327482769769996	0.0171169824793749	OLFM2
ENSG00000151465	2896.80584800848	0.237573593106287	0.0661200638260736	3.59306357796653	0.00032681280643145	0.0171169824793749	CDC123
ENSG00000134248	1926.6905569262	0.282399523705297	0.0786136185833024	3.5922468497752	0.000327839075111417	0.0171169824793749	LAMTOR5
ENSG00000163171	6972.8218994912	0.300680734328149	0.0837322511804071	3.59097874581577	0.000329438503516506	0.0171455374513862	CDC42EP3
ENSG00000204344	321.112300511426	0.189938886779478	0.0529110621557208	3.5897764860678	0.000330961625003879	0.0171699518194688	STK19
ENSG00000164124	222.336127274574	0.443455024266083	0.123600065639816	3.58782191555108	0.000333451908231949	0.0172442272542808	TMEM144
ENSG00000270049	119.486701346956	0.233927036545924	0.0652401270125561	3.58563122510326	0.000336263861403669	0.0173346148805879	RP11-297D21.4
ENSG00000173928	217.660999252064	0.252261360497159	0.0704020707129921	3.58315256841737	0.000339472193092687	0.0174190833079181	SWSAP1
ENSG00000224080	19.3267130095508	0.737461828632153	0.205838797984533	3.58271538627799	0.000340041036950151	0.0174190833079181	UBE2FP1
ENSG00000152969	170.056517742176	-0.575270704516274	0.160739258755009	-3.57890604306615	0.000345035476363037	0.0176195232286955	JAKMIP1
ENSG00000238113	214.261081533547	0.472063139776254	0.131958760802093	3.57735353762708	0.000347090585083032	0.0176690800968831	LINC01410
ENSG00000067992	856.580040587269	0.251844950568799	0.0704539031999848	3.57460607759278	0.000350755586428955	0.0178000264888712	PDK3
ENSG00000111348	49517.6910509051	0.208637197529941	0.0584071718812201	3.57211607427657	0.000354108388111546	0.0178734994651431	ARHGDIB
ENSG00000115828	5356.10489093468	0.460681652391244	0.12897375990753	3.57190216615796	0.000354397810143721	0.0178734994651431	QPCT
ENSG00000198301	1354.59634911947	-0.166658930521652	0.0466863254393341	-3.56975900230603	0.000357309791760189	0.0179647423079428	SDAD1
ENSG00000115956	18019.2773023083	0.204704089686765	0.057372334044738	3.56799305963637	0.000359726030345685	0.0180305754902499	PLEK
ENSG00000149925	144.901654933517	0.535977952769846	0.15033470715117	3.56523096313941	0.000363535907798412	0.0181343954580516	ALDOA
ENSG00000285130	23.3018204774944	0.58849370982675	0.16508096709561	3.5648792236958	0.000364023776229765	0.0181343954580516	ENSG00000285130
ENSG00000150637	2435.27001037677	-0.352448652120406	0.098900164548924	-3.56368114985346	0.000365690122116395	0.0181618661258417	CD226
ENSG00000100567	1801.22884599042	0.235179867701025	0.0660523672180314	3.56050627110339	0.000370140470924636	0.0183270160223779	PSMA3
ENSG00000213523	1540.48508026644	0.273580043319564	0.076887076355599	3.55820582973229	0.000373396667297994	0.0184322173038919	SRA1
ENSG00000167705	286.240642625422	0.344545763141488	0.0968697230519527	3.55679517073361	0.000375406631593239	0.0184754502376249	RILP
ENSG00000138078	1319.49180416792	-0.237989218073507	0.0669947559775456	-3.55235592101079	0.000381798043535666	0.0187334040036024	PREPL
ENSG00000126432	3533.60919106421	0.299319038583907	0.0843186146282572	3.5498571685925	0.000385440213598841	0.0188553185571325	PRDX5
ENSG00000197249	38490.1806363716	0.373820980509126	0.105343363417624	3.5485954537748	0.0003872915962773	0.0188891619860995	SERPINA1
ENSG00000168661	159.505128671091	-0.337525892944641	0.0952648916845128	-3.54302500088301	0.000395565199932955	0.0189173203259978	ZNF30
ENSG00000111371	8423.49473098013	-0.274422006887126	0.0774407553167071	-3.54363804646315	0.00039464664266424	0.0189173203259978	SLC38A1
ENSG00000136925	568.56595294057	-0.177567260786284	0.050101096712284	-3.54417911859298	0.000393837583017349	0.0189173203259978	TSTD2
ENSG00000126581	3851.91863684839	0.110306180632823	0.0311281722693731	3.54361250889609	0.000394684867079644	0.0189173203259978	BECN1
ENSG00000159377	5651.02573380105	0.179725249070538	0.0506909831459185	3.54550726611837	0.000391858183983242	0.0189173203259978	PSMB4
ENSG00000154813	1444.97511421963	0.183585356228052	0.051762485141336	3.5466874460679	0.000390107111767403	0.0189173203259978	DPH3
ENSG00000105355	3015.19337855267	0.321716227585381	0.0908100879397898	3.54273665937523	0.00039599792702058	0.0189173203259978	PLIN3
ENSG00000179335	3503.85947589939	0.173314184898511	0.0489416561491545	3.54124070444856	0.000398250082709216	0.01896928025536	CLK3
ENSG00000100592	435.723092844143	-0.236135459185299	0.0667515124660432	-3.53752971972616	0.000403888728711746	0.0191817708184092	DAAM1
ENSG00000217555	1306.68770563154	0.349004880909227	0.0987218516020614	3.53523435030406	0.000407413661265	0.0192929318081594	CKLF
ENSG00000204472	14147.0694789162	0.304537911607432	0.0862115058297878	3.53245090288411	0.000411726671189146	0.0194406593439744	AIF1
ENSG00000213949	223.342879084258	0.506750990486753	0.143575148405812	3.52951744165664	0.000416318261595678	0.0196006487901549	ITGA1
ENSG00000172508	227.845564074742	-0.408036930040674	0.115667692359994	-3.52766551934602	0.000419241554918414	0.019653857554978	CARNS1
ENSG00000167984	2549.47271738977	-0.316602995100265	0.0897778767237006	-3.52651462313637	0.000421067912012727	0.019653857554978	NLRC3
ENSG00000115661	1005.04102015182	0.174866569567179	0.0495854428709663	3.52657069176987	0.000420978764815154	0.019653857554978	STK16
ENSG00000185869	162.235691800917	-0.297731518849717	0.0845444875920259	-3.52159587608405	0.000428957520958504	0.0199649086183258	ZNF829
ENSG00000153310	11788.7804453095	0.196043313598124	0.055694623869965	3.5199683555785	0.000431598288274518	0.0200071118368259	FAM49B
ENSG00000255422	47.6588796095083	0.914608416008491	0.259867019886456	3.5195247800514	0.000432320648653328	0.0200071118368259	AP002954.4
ENSG00000101665	483.59264093035	-0.275869619515398	0.0784676696860954	-3.51571061838583	0.000438578735828326	0.0201252045257562	SMAD7
ENSG00000111786	3086.07587928313	0.171542637966022	0.0487894753870198	3.51597627572892	0.000438140133264198	0.0201252045257562	SRSF9
ENSG00000197448	6832.15602954522	0.196141786777988	0.0557760410329819	3.51659571287973	0.000437119027138565	0.0201252045257562	GSTK1
ENSG00000204427	118.85346785083	0.305056740612259	0.0868848382121305	3.51104688561955	0.000446345667791178	0.0204240756413435	ABHD16A
ENSG00000169372	254.445989328018	0.181849186789918	0.0518119714953748	3.50979091398117	0.000448459185524353	0.0204633056924137	CRADD
ENSG00000100319	594.000046142681	0.261726030521756	0.0746108099687027	3.50788351756995	0.000451686774832535	0.020495759225688	ZMAT5
ENSG00000085514	6928.32990091251	0.343361466960443	0.0978720219875744	3.50826988129494	0.000451031246089927	0.020495759225688	PILRA
ENSG00000135506	11799.8298143178	0.214083024484998	0.0610821614774365	3.50483708020187	0.000456886781214947	0.0205599051546726	OS9
ENSG00000101150	6345.95558011625	0.241173406739306	0.0688003356194556	3.50541032347967	0.000455904057327099	0.0205599051546726	TPD52L2
ENSG00000113494	77.3709231819481	0.546113251389045	0.155808719853667	3.5050236719867	0.000456566685924564	0.0205599051546726	PRLR
ENSG00000151692	930.360771132182	-0.237033766403693	0.0677149883171541	-3.50046233920188	0.000464451859805063	0.0207853339859907	RNF144A
ENSG00000127804	1065.45609871837	-0.194103999573983	0.0554463009130655	-3.50075652257342	0.000463939496446122	0.0207853339859907	METTL16
ENSG00000277687	72.2134162003873	0.434596109323038	0.124179785875755	3.49973311886575	0.000465724180778798	0.0207853339859907	RP11-427L15.2
ENSG00000124535	1185.85293502718	-0.093865385913873	0.0268315958123211	-3.49831544014128	0.000468207013777871	0.0208390498755233	WRNIP1
ENSG00000069020	349.7736564033	-0.345744360595775	0.0989873928743712	-3.49281206986199	0.000477962753333283	0.0208710543512718	MAST4
ENSG00000110619	2286.54806374375	0.173105706023306	0.049570163095216	3.49213509124026	0.000479175833479167	0.0208710543512718	CARS
ENSG00000066322	2820.04912250928	0.175770090701729	0.0502930953608129	3.49491494688721	0.000474212845346462	0.0208710543512718	ELOVL1
ENSG00000115425	284.977436377982	0.214668079376069	0.0613938119925283	3.4965751825639	0.000471271673755195	0.0208710543512718	PECR
ENSG00000185973	437.242722772928	0.223820322227174	0.0640300347890311	3.49555209464788	0.000473082094648326	0.0208710543512718	TMLHE
ENSG00000070759	623.419600855761	0.239424696925372	0.0684902605875377	3.49574807967569	0.000472734784754927	0.0208710543512718	TESK2
ENSG00000116701	45559.1007123545	0.286257012163261	0.0819407199981674	3.49346469215383	0.00047679602969226	0.0208710543512718	NCF2
ENSG00000113269	8513.77326455073	0.288319630449728	0.08251966352846	3.49395063093405	0.000475929020071122	0.0208710543512718	RNF130
ENSG00000171827	310.103691319921	-0.211783554224691	0.0606944631047758	-3.48933895105214	0.000484216735591656	0.0210002393901551	ZNF570
ENSG00000087263	897.63127979575	-0.140986851374391	0.0404082477826797	-3.48906124642264	0.000484720074321567	0.0210002393901551	OGFOD1
ENSG00000185630	127.253129608187	-0.457286672496038	0.131369677808461	-3.48091492743682	0.000499704178646615	0.0214215291319825	PBX1
ENSG00000225828	325.242516350792	0.271718614459021	0.0780504890399976	3.48131853882141	0.000498951732338559	0.0214215291319825	FAM229A
ENSG00000159496	1169.47436378989	0.478274616408007	0.13732171439561	3.48287682332704	0.000496056548931787	0.0214215291319825	RGL4
ENSG00000278869	22.373053748412	0.545942406617515	0.156835511033906	3.48098720129454	0.000499569361922666	0.0214215291319825	CITF22-49E9.3
ENSG00000197746	104735.18442777	0.295381056053107	0.0850051845676383	3.47485929894163	0.000511121363494408	0.0218534567226349	PSAP
ENSG00000160539	17.7431948681949	0.600905003719398	0.17298759056455	3.4736884984543	0.000513356634976372	0.0218915695910081	PLPP7
ENSG00000111775	753.024839297933	0.21484059388036	0.0618875541305043	3.4714668708238	0.000517623197215704	0.0220158795891483	COX6A1
ENSG00000107485	761.133714902644	-0.337998771887545	0.0974005652327485	-3.47019312546968	0.000520084266424483	0.0220629497397261	GATA3
ENSG00000166710	448482.417840878	0.201019661992998	0.0579479649131744	3.46896844943896	0.000522460806167102	0.0221061987856158	B2M
ENSG00000108100	6056.73957728236	0.147783114919503	0.0426150236270136	3.46786420237542	0.000524612321272361	0.022110241759318	CCNY
ENSG00000105501	491.361402504517	0.48473420340336	0.139814697905165	3.46697600943321	0.000526348865237132	0.022110241759318	SIGLEC5
ENSG00000273812	21.3805697456541	0.546894963798302	0.157750576377398	3.46683337935911	0.000526628226066016	0.022110241759318	WI2-87327B8.2
ENSG00000014914	753.5078478151	0.317572969851248	0.0916397450224457	3.46545016873916	0.000529344613202246	0.0221671561672612	MTMR11
ENSG00000071553	4112.13107789729	0.231002947772389	0.0667039372276462	3.46310813684094	0.000533973749479728	0.0223036727667302	ATP6AP1
ENSG00000168792	617.07326070717	-0.1624286027695	0.0469241784527415	-3.46151191401434	0.000537150344394816	0.0223218854851825	ABHD15
ENSG00000100504	12443.1732655995	0.371194211875912	0.107224201894257	3.46185101234867	0.000536474045696573	0.0223218854851825	PYGL
ENSG00000163798	1029.83185131371	0.124126367811607	0.0359040796194376	3.45716612505527	0.000545888216127823	0.0225652506899469	SLC4A1AP
ENSG00000116209	7759.61814290248	0.203684930803398	0.0589390613735098	3.45585637193307	0.000548547530584344	0.0225652506899469	TMEM59
ENSG00000204316	78.9684694270464	0.336346436170302	0.097325123239944	3.45590557682704	0.000548447407490999	0.0225652506899469	MRPL38
ENSG00000143452	82.6510037853234	0.517921720019726	0.14986557289989	3.45590858526058	0.000548441286423106	0.0225652506899469	HORMAD1
ENSG00000004059	2933.5576813799	0.286627606434503	0.0829886121678887	3.4538185293983	0.000552709159569435	0.0226791743309473	ARF5
ENSG00000158292	64.2049877846272	-0.617516063583607	0.179010769705852	-3.44960286243281	0.000561411799842276	0.0227916714908458	GPR153
ENSG00000106992	110.269554920905	-0.39548358083273	0.114631226664216	-3.45005102310562	0.000560480610284845	0.0227916714908458	AK1
ENSG00000090565	495.311704983067	-0.23751108185062	0.0688616411517995	-3.44910574127978	0.000562446405114795	0.0227916714908458	RAB11FIP3
ENSG00000049860	3508.60887967913	0.264411989021395	0.0766555259679404	3.44935326817769	0.00056193103200647	0.0227916714908458	HEXB
ENSG00000280332	132.965282235724	0.392219207424512	0.113679763679666	3.4502113193139	0.000560147895775089	0.0227916714908458	CTD-2013N17.6
ENSG00000178033	19.5992986460304	-0.605145321190197	0.175622822303357	-3.44571003502562	0.000569561156932102	0.0229882767754231	FAM26E
ENSG00000266236	40.7345450080729	0.493863818885373	0.143338192369014	3.44544472567336	0.000570120553546404	0.0229882767754231	NARF-IT1
ENSG00000007402	327.630823669412	-0.532807773140307	0.154737526873172	-3.44330030282191	0.000574660818856488	0.0231141351584499	CACNA2D2
ENSG00000150527	1792.71783486001	0.145820885863137	0.0424297318989721	3.4367618963595	0.000588712888869507	0.0232770217468065	CTAGE5
ENSG00000162736	4700.84597917712	0.199253574195414	0.057960840288617	3.43772749330802	0.000586617728642759	0.0232770217468065	NCSTN
ENSG00000129255	1128.2038247038	0.203191335900984	0.0591119405564822	3.43739917837466	0.000587329328988277	0.0232770217468065	MPDU1
ENSG00000237765	1423.68328148392	0.258461619017187	0.0751622424469658	3.43871617720236	0.000584479668264088	0.0232770217468065	FAM200B
ENSG00000110077	9465.39670983046	0.360709374902578	0.104850624658523	3.44022151586923	0.000581238253544196	0.0232770217468065	MS4A6A
ENSG00000108405	2230.06322941557	0.40685034214664	0.118333208689363	3.43817552699567	0.00058564794097435	0.0232770217468065	P2RX1
ENSG00000186594	831.722730214357	0.55563170678716	0.161566588595631	3.43902604874449	0.00058381105585396	0.0232770217468065	MIR22HG
ENSG00000115216	4298.8805105015	0.153397782572013	0.0446622136427539	3.43462112735875	0.000593382813898004	0.0234048572358317	NRBP1
ENSG00000141425	1335.252225009	0.154797418270497	0.0450989092660227	3.43239827281412	0.000598268276200081	0.0235335204995341	RPRD1A
ENSG00000100284	2572.46482938556	0.326796659807916	0.0952253255561547	3.43182507278699	0.000599534131817474	0.0235335204995341	TOM1
ENSG00000126267	3953.17362529023	0.238170306319319	0.0694811647093067	3.42783986589415	0.000608404221385255	0.0238242903037639	COX6B1
ENSG00000074800	17273.7860768139	0.206349595208783	0.0602360680716915	3.42568168565038	0.000613258627116908	0.0239567938506821	ENO1
ENSG00000123353	839.43119856879	0.169629102461387	0.0495649250102573	3.42236172911152	0.000620796637084615	0.0240208484990698	ORMDL2
ENSG00000103066	378.046690610975	0.274275839321169	0.0801262970429229	3.42304398734715	0.000619240557365048	0.0240208484990698	PLA2G15
ENSG00000168615	1049.95807854555	0.276926170389305	0.0808736126741254	3.42418449272397	0.000616647419295192	0.0240208484990698	ADAM9
ENSG00000165264	852.30754026821	0.306828390423892	0.0896450034642278	3.42270487552973	0.00062001354201364	0.0240208484990698	NDUFB6
ENSG00000189013	30.9491624588526	-0.737694545960434	0.215736124302379	-3.41942986296755	0.000627525074033221	0.0241663911489389	KIR2DL4
ENSG00000041357	3559.97700456664	0.225954038096353	0.0660715366798743	3.41983930525381	0.000626581372812228	0.0241663911489389	PSMA4
ENSG00000131981	2397.64401053909	0.321709595265679	0.0941391208821196	3.41738474133959	0.000632258592606221	0.0242912558338569	LGALS3
ENSG00000265874	13.325529916945	0.503795229038167	0.147519300089153	3.41511401378463	0.000637553188210183	0.0244370386728091	MIR4489
ENSG00000279148	17.9273884097344	0.451765491088918	0.132310661246946	3.41443000005673	0.000639156149801769	0.0244409710804479	RP11-135F9.4
ENSG00000140612	3335.78128749271	0.180936648447624	0.0530272582075352	3.4121441417824	0.000644540213897259	0.0245891336870875	SEC11A
ENSG00000146425	3031.82719908974	0.278176585627707	0.08157629690652	3.41001732337121	0.000649587532881599	0.0246949481767053	DYNLT1
ENSG00000133216	121.270301394837	0.553025761876436	0.162191952544171	3.40969914475766	0.000650345780712497	0.0246949481767053	EPHB2
ENSG00000158773	5627.15181985003	0.204264315635708	0.059923697067381	3.40874020850254	0.000652635992404272	0.0247242798052688	USF1
ENSG00000177674	4414.52192913621	0.315375007180847	0.0925607454850395	3.40722198733609	0.000656277277720507	0.0248045402646567	AGTRAP
ENSG00000205758	742.076324091473	0.185033728690422	0.0543257449853146	3.40600444118051	0.000659211068214762	0.0248370216411299	CRYZL1
ENSG00000118564	16533.8226905433	0.232863168965199	0.0683765282516405	3.40560094113307	0.000660186026433963	0.0248370216411299	FBXL5
ENSG00000100522	374.328433291704	-0.233514500658151	0.0686575593929464	-3.40114770642636	0.000671035591679764	0.0251745530944665	GNPNAT1
ENSG00000251429	15.2485726122916	0.746548923662023	0.219530987405576	3.40065396910368	0.000672248655377097	0.0251745530944665	RP11-597D13.7
ENSG00000186462	222.472406394306	-0.362693478243032	0.106746815172236	-3.39769835435208	0.000679553042517242	0.0252016840300506	NAP1L2
ENSG00000177842	58.9829973355329	-0.299538738194429	0.0881451885346409	-3.39824264005869	0.000678202398764674	0.0252016840300506	ZNF620
ENSG00000109762	330.077793619415	-0.284732401700727	0.0838792668170873	-3.39455043546856	0.000687413771793186	0.0252016840300506	SNX25
ENSG00000160208	1181.76215521003	-0.182952996455549	0.0539315963552114	-3.39231561496084	0.000693045594740141	0.0252016840300506	RRP1B
ENSG00000130921	527.589968281862	-0.162586018415333	0.0479031418177079	-3.39405751368131	0.000688652282398418	0.0252016840300506	C12orf65
ENSG00000043462	11610.6131164095	0.149298126473869	0.0440108848261589	3.39230004267331	0.000693084987443993	0.0252016840300506	LCP2
ENSG00000144455	829.849011924318	0.205365992983439	0.0605271024994462	3.39295926127172	0.000691419203163704	0.0252016840300506	SUMF1
ENSG00000170310	766.559894877149	0.227020059808965	0.0668318523943188	3.39688414544475	0.00068157816866987	0.0252016840300506	STX8
ENSG00000143862	1209.85614827843	0.229002778134976	0.0673612293374802	3.3996229045594	0.000674788455804315	0.0252016840300506	ARL8A
ENSG00000158062	3602.73206673601	0.311861267614196	0.0918781102628641	3.3942934472853	0.000688059219310528	0.0252016840300506	UBXN11
ENSG00000280387	32.5869113051279	0.525627142503404	0.154873361413189	3.39391576257633	0.000689008828669151	0.0252016840300506	RP5-1153D9.5
ENSG00000167434	511.888557783877	0.60488922784631	0.178088327159535	3.39656864374069	0.000682364401486774	0.0252016840300506	CA4
ENSG00000138670	387.422668210085	0.722006628270523	0.212779379395218	3.39321709802275	0.000690768686512791	0.0252016840300506	RASGEF1B
ENSG00000178229	137.615765352144	-0.285127025503204	0.0840911144499	-3.39069148230967	0.000697165337978303	0.0252373852348146	ZNF543
ENSG00000254789	167.983224495014	0.893046824811652	0.263376262066612	3.39076429213574	0.000696980163770534	0.0252373852348146	RP11-531H8.2
ENSG00000063587	596.869608406227	-0.231630154622129	0.0683670098169287	-3.38803986370592	0.000703940324745505	0.0254261372286126	ZNF275
ENSG00000248429	208.991664174655	0.411529594303297	0.121506361315946	3.38689752409935	0.000706877859955006	0.0254757529616527	RP11-597D13.9
ENSG00000247626	323.827071603009	-0.21341004379499	0.0630416940745578	-3.38522063735463	0.000711210625575395	0.0255189891863947	mars2
ENSG00000010244	6172.25577544775	0.136769777290428	0.0403985479896635	3.38551220517684	0.000710455500268215	0.0255189891863947	ZNF207
ENSG00000113360	872.149905072508	-0.179566406371584	0.0530763778636796	-3.38316994488167	0.000716542774869041	0.0255415356731218	DROSHA
ENSG00000114480	732.305975626533	0.175756216651085	0.0519430041070196	3.38363596161997	0.000715327801057302	0.0255415356731218	GBE1
ENSG00000110801	271.311824732224	0.234644563115517	0.0693554228966823	3.38321869171015	0.000716415595026452	0.0255415356731218	PSMD9
ENSG00000198342	38.919533520342	-0.387835465793159	0.114687527360554	-3.38167082959147	0.000720464204125453	0.025581176485334	ZNF442
ENSG00000140948	495.698114247243	-0.207760108574985	0.0614502790126855	-3.38094654593995	0.000722365941267872	0.025581176485334	ZCCHC14
ENSG00000258311	48.7706156890534	0.37448958906672	0.110755012682273	3.38124279883415	0.000721587513008612	0.025581176485334	RP11-644F5.10
ENSG00000245888	47.7842596693179	0.514074511406516	0.152144407763122	3.37885906530914	0.000727873118706045	0.0257202887282461	FLJ21408
ENSG00000028528	5607.54884034993	0.109085985317587	0.0322979629104933	3.37748809793034	0.000731511187444711	0.0257928944663947	SNX1
ENSG00000279227	49.8735757950184	0.280559283310179	0.0830839464566045	3.37681700587872	0.000733298182513128	0.0258000591644468	AC009303.2
ENSG00000189241	2356.70690337509	-0.133343853068125	0.039503548665711	-3.37549049571506	0.000736842370839414	0.0258688840969268	TSPYL1
ENSG00000183891	665.625593085684	0.249742582392777	0.0740687580175359	3.3717668430953	0.000746876475915885	0.0261647694466017	TTC32
ENSG00000100985	5387.14233974905	0.874786054037139	0.25954401029308	3.37047290380279	0.000750392853376466	0.0262315441663147	MMP9
ENSG00000178719	3072.8911092208	0.350519777981916	0.104119013318618	3.36652996229689	0.000761203124330193	0.0265524601613251	GRINA
ENSG00000188636	860.963921538899	-0.247110826443556	0.0734425601747172	-3.36468153963707	0.000766320527004514	0.0266169752343359	LDOC1L
ENSG00000100365	11911.3724966478	0.362724159522282	0.10779076020149	3.36507655057123	0.000765224253542751	0.0266169752343359	NCF4
ENSG00000131669	7190.17322808811	0.376385229807815	0.111900284187292	3.363577068114	0.000769393509002614	0.0266668516205374	NINJ1
ENSG00000082996	5383.97989966531	0.242370224631675	0.0720714823531135	3.36291438330884	0.000771242790900495	0.0266741933413356	RNF13
ENSG00000137266	103.275618407788	-0.374035745869264	0.111243746330959	-3.3623080685945	0.000772938381062914	0.0266761996345654	SLC22A23
ENSG00000198189	9155.49802810493	0.265834150807718	0.0791075347467361	3.36041505602203	0.000778254583397433	0.0268028904091843	HSD17B11
ENSG00000222365	36.9242519411417	0.573395931606688	0.170734228329116	3.35841229505183	0.000783915932591519	0.0269409083162781	SNORD12B
ENSG00000126001	1748.36693410203	-0.193333921707757	0.0575887994152302	-3.35714450849668	0.000787519409641917	0.0269709762386835	CEP250
ENSG00000125037	2062.16046674169	0.178696507731374	0.0532319638932261	3.35693997857766	0.000788102190890935	0.0269709762386835	EMC3
ENSG00000107521	2730.64301559308	0.173127752232121	0.0515994724245688	3.35522330165699	0.000793009440374543	0.0270820205109042	HPS1
ENSG00000170468	338.422511711266	-0.1797563670704	0.0536065729051085	-3.35325235934398	0.000798678490819116	0.0271617382368338	C14orf169
ENSG00000158517	4349.44776750035	0.404873665496815	0.120731462094734	3.35350585897091	0.000797947244342471	0.0271617382368338	NCF1
ENSG00000149218	812.797799131122	-0.216801225332931	0.0646801521842256	-3.35189726696106	0.000802597956749178	0.0272381681571752	ENDOD1
ENSG00000197959	220.815730403128	-0.473634799680372	0.141352468022136	-3.35073597445925	0.000805971071465418	0.0272391467928873	DNM3
ENSG00000204020	422.596719578801	0.531989681200661	0.158749830532599	3.35111967940916	0.000804855101493101	0.0272391467928873	LIPN
ENSG00000135372	1247.58823213099	-0.160306910883532	0.0478699060285737	-3.34880354241439	0.000811613226754112	0.0273730423681666	NAT10
ENSG00000123130	1622.52374264772	0.193279994065263	0.0577310917846338	3.3479358884515	0.000814158433968723	0.0274021505978316	ACOT9
ENSG00000117335	25946.8548298891	0.224059037587749	0.0669805017053176	3.34513823998367	0.000822415681660917	0.0275661552556715	CD46
ENSG00000228278	24.887439188396	1.12286933846088	0.335657659257427	3.34528144224384	0.000821991141107998	0.0275661552556715	ORM2
ENSG00000109083	793.62893948686	0.251912028637288	0.0753206764829485	3.34452690018414	0.000824230361919894	0.0275702517364991	IFT20
ENSG00000264364	4229.60725825119	-0.168874576617944	0.0505140232923084	-3.3431226738904	0.000828412694523881	0.0276533663807254	DYNLL2
ENSG00000001461	1159.93248708124	-0.213538373631434	0.063941004978432	-3.33961553628165	0.000838944456025431	0.0279476588725036	NIPAL3
ENSG00000165178	1890.62907670289	0.41196267692535	0.123393256087664	3.33861582056538	0.000841969220618275	0.027991180824228	NCF1C
ENSG00000135441	1010.6263193333	0.245967716195983	0.0736887486672317	3.33792771141684	0.000844057054539398	0.0280034407707674	BLOC1S1
ENSG00000161526	2849.00860404973	0.165707389187665	0.0496733310272852	3.33594276366614	0.000850106640250215	0.0281468235156016	SAP30BP
ENSG00000145022	1043.00035950836	0.154741087869704	0.0464187680971875	3.33358885237371	0.000857332838659948	0.0283285029244839	TCTA
ENSG00000175746	64.7147967083861	-0.858081469656601	0.257525351491534	-3.33202717591402	0.000862158366963501	0.0283711613409262	C15orf54
ENSG00000121289	409.343709438295	-0.154912922482703	0.0464997021330377	-3.33148203916427	0.000863848743100025	0.0283711613409262	CEP89
ENSG00000261662	161.513413251299	0.325863317190035	0.0978030879671122	3.33183055835222	0.000862767690561441	0.0283711613409262	RP5-1042I8.7
ENSG00000175197	1292.64302514887	0.313399862195797	0.0942085035931071	3.32666214028186	0.000878928694593182	0.0288083469515552	DDIT3
ENSG00000107968	1699.61028877031	0.145548415335459	0.0437661236200166	3.32559530743755	0.000882299300627218	0.0288607542313602	MAP3K8
ENSG00000132275	663.040698889512	-0.114631139136322	0.0344754561213222	-3.32500717997537	0.000884162580502186	0.0288637443614842	RRP8
ENSG00000197044	713.323784134046	-0.235901869928707	0.0709969763536936	-3.32270305081005	0.000891497618101381	0.029019741232757	ZNF441
ENSG00000204435	767.558180193433	0.204756020346787	0.0616392319833188	3.32184574269516	0.000894241168238869	0.029019741232757	CSNK2B
ENSG00000048052	1116.6706885242	0.340219983197387	0.102435684311531	3.32130336692725	0.000895980914139933	0.029019741232757	HDAC9
ENSG00000241975	122.263896619933	0.477251256699329	0.143695125803923	3.3212765849174	0.000896066902398821	0.029019741232757	TCEB1P19
ENSG00000079246	12343.8699668454	0.103049632837248	0.0310357998626516	3.32034725360043	0.000899055422813076	0.0290587556302083	XRCC5
ENSG00000117614	4105.04161435932	0.17785762576566	0.053604779754231	3.31794341066427	0.000906828546871621	0.0291941443251753	SYF2
ENSG00000231113	258.853931901853	0.222615182367878	0.0670872821042184	3.3182918637552	0.000905697933842604	0.0291941443251753	RP3-475N16.1
ENSG00000164167	746.251247477137	0.254485486418737	0.0767844329311242	3.31428489739595	0.000918778409875122	0.0294624021591845	LSM6
ENSG00000169682	31.833447778922	0.439352238347375	0.132562742338086	3.31429654062873	0.00091874014901003	0.0294624021591845	SPNS1
ENSG00000186205	1451.52644223074	0.469469390927436	0.141688495323531	3.31339104036253	0.000921720127927318	0.0294986657837643	MARC1
ENSG00000210194	32.2615866880746	-0.718647110601534	0.217171626169945	-3.30912064009304	0.000935895008732885	0.029526399137712	MT-TE
ENSG00000165244	168.924741807829	-0.309674413115443	0.0935205517039851	-3.31129797112015	0.000928642678004062	0.029526399137712	ZNF367
ENSG00000198804	213275.25560418	-0.235527612359346	0.0711475074576811	-3.31041270137875	0.000931585061115058	0.029526399137712	MT-CO1
ENSG00000159596	722.534799885113	0.120153458155029	0.0363225729426202	3.30795558852173	0.00093979711944593	0.029526399137712	TMEM69
ENSG00000171155	872.415641158804	0.217177360498176	0.0656157326060494	3.30983670946857	0.000933504129050789	0.029526399137712	C1GALT1C1
ENSG00000131174	1894.32820219898	0.260454524654964	0.0787492887994048	3.3073889126594	0.000941700532065399	0.029526399137712	COX7B
ENSG00000183723	303.846306826018	0.280844367032298	0.0848934994167181	3.30819637500997	0.000938989419044313	0.029526399137712	CMTM4
ENSG00000270959	52.650414488229	0.284262756255535	0.0859541548171974	3.30714387059113	0.000942524711578283	0.029526399137712	LPP-AS2
ENSG00000130724	4609.93670456329	0.288970948954706	0.0873747061308191	3.30726089678692	0.000942131019949802	0.029526399137712	CHMP2A
ENSG00000100979	50.0011481486712	0.462725098113607	0.139882110060462	3.30796481346758	0.000939766163196442	0.029526399137712	PLTP
ENSG00000227376	11.8837199192084	0.536895810824316	0.162173913548239	3.31061758995299	0.000930903302969274	0.029526399137712	FTH1P16
ENSG00000147604	87.7650268923546	0.302892284014612	0.0916190849406772	3.30599551622605	0.000946396021125563	0.0295907700271313	RPL7
ENSG00000213373	134.531961937356	0.576987247166365	0.174720445835586	3.3023453231645	0.000958799517651414	0.0299211573611907	LINC00671
ENSG00000213903	2855.73515251969	0.349534462963165	0.105864183218585	3.30172540264592	0.00096092092839184	0.029930022798285	LTB4R
ENSG00000112877	79.2831732608077	-0.286473356178797	0.0868165300005272	-3.29975588954151	0.000967689617774706	0.030083328002958	CEP72
ENSG00000109861	7545.70825258692	0.22027363535825	0.0667883457812002	3.2980849096019	0.000973466923400417	0.0302052879660815	CTSC
ENSG00000234076	13.9430974596515	0.714449041166104	0.216671174948692	3.29738850280978	0.00097588412163756	0.0302227230826537	TPRG1-AS1
ENSG00000080839	514.35403135906	-0.245446284856885	0.0744610928606411	-3.29630247727165	0.000979664764466585	0.0302822372166237	RBL1
ENSG00000144476	144.088701234045	-0.294264904725218	0.0893866958512261	-3.29204365283832	0.00099462172004608	0.0305947913926443	ACKR3
ENSG00000022840	5711.3809662497	0.222946192696934	0.0677273203501318	3.29182066475335	0.000995410646906167	0.0305947913926443	RNF10
ENSG00000132963	1757.54113716459	0.278036091828519	0.0844439035993763	3.29255375435501	0.000992819168592548	0.0305947913926443	POMP
ENSG00000160049	804.028726460153	-0.129003266496478	0.0392047189091356	-3.29050354360319	0.00100008242172831	0.0306265665163257	DFFA
ENSG00000102125	1673.55049897814	0.188150870564239	0.0571897439117701	3.28994077774697	0.00100208471167597	0.0306265665163257	TAZ
ENSG00000116815	1503.10059052253	0.217715029841028	0.0661748391255422	3.28999711548969	0.00100188409805204	0.0306265665163257	CD58
ENSG00000166750	7876.32331423648	-0.322155814328842	0.0979883282534365	-3.2876957906213	0.00101010924023753	0.0308140065982574	SLFN5
ENSG00000118971	1836.17933186846	-0.197986980980521	0.0602627431798712	-3.285396092733	0.00101839096899864	0.0310085773551175	CCND2
ENSG00000176407	2066.37820656557	0.145035898536746	0.0441585199515749	3.2844374923751	0.00102186162670003	0.0310562050353424	KCMF1
ENSG00000171262	870.315322619289	-0.19393022113651	0.0590809390683387	-3.28244987629922	0.00102909279266696	0.031058728167358	FAM98B
ENSG00000172315	702.87558974906	-0.173497117679925	0.0528494992406646	-3.28285263195888	0.00102762370854576	0.031058728167358	TP53RK
ENSG00000162882	160.030945748432	0.349062982646055	0.106346457306278	3.28231886127389	0.00102957109947043	0.031058728167358	HAAO
ENSG00000134363	15.1078154146926	1.67787469605239	0.511075250556917	3.28302866206888	0.00102698223409685	0.031058728167358	FST
ENSG00000145569	2031.19815045806	0.197741562378472	0.0603230240444338	3.2780445859746	0.00104528883699017	0.0314745936313674	FAM105A
ENSG00000134769	25.9995280161981	0.57842665149859	0.176526470739784	3.27671339643584	0.00105022916166232	0.0315650056152752	DTNA
ENSG00000137752	11706.3229534861	0.232918774358509	0.0711089939442927	3.27551778528859	0.00105468473299801	0.0316405419899404	CASP1
ENSG00000175087	538.582358297176	-0.238274904973666	0.07282225028519	-3.27200689405397	0.00106786972096464	0.0318153280245109	PDIK1L
ENSG00000088298	1631.24191726503	0.194393922661407	0.0593933457453319	3.27299161584419	0.00106415634098492	0.0318153280245109	EDEM2
ENSG00000125753	16625.2702881322	0.301005887177747	0.0919976452790714	3.27188686476329	0.00106832316939272	0.0318153280245109	VASP
ENSG00000126759	8586.95474758965	0.364511257867821	0.111399271608725	3.27211527152637	0.00106746044391304	0.0318153280245109	CFP
ENSG00000185022	312.69138025749	0.608389275025328	0.185999502066163	3.27091883723922	0.00107198671432811	0.0318661744094979	MAFF
ENSG00000149269	8877.34668744773	0.260012247770378	0.0795241153552537	3.26960251753622	0.00107698703435629	0.0319565005276209	PAK1
ENSG00000172575	3138.07052367503	-0.297145326583762	0.0909112160173179	-3.2685221868241	0.0010811070100978	0.0320204239899875	RASGRP1
ENSG00000071909	12.5131868754526	-1.01819984039835	0.311683083314885	-3.26677928609198	0.00108778452098278	0.0321046225257049	MYO3B
ENSG00000126861	87.2058069650923	0.488446388028506	0.149520523443756	3.26675145845274	0.0010878914447016	0.0321046225257049	OMG
ENSG00000178732	105.939834887597	-0.462434317650922	0.141809545209585	-3.26095339328164	0.00111038289811948	0.0323088035797899	GP5
ENSG00000186310	143.195230673295	-0.360343672932902	0.110598290194334	-3.25813059406014	0.0011214878279865	0.0323088035797899	NAP1L3
ENSG00000158555	687.137171885583	-0.325217303073954	0.0996832961975706	-3.26250550974336	0.00110432026117279	0.0323088035797899	GDPD5
ENSG00000164916	1091.33253180262	-0.190546244087069	0.0584911047133164	-3.25769610645922	0.00112320619844164	0.0323088035797899	FOXK1
ENSG00000158796	1385.65779201279	0.135382375925954	0.0415620691576354	3.2573540891932	0.00112456056658937	0.0323088035797899	DEDD
ENSG00000081791	2274.59361393704	0.144818077721674	0.0443817972729596	3.2630061561276	0.0011023712523109	0.0323088035797899	KIAA0141
ENSG00000101608	16073.5379664134	0.168835677808423	0.0517878043308638	3.2601435799394	0.00111355826911084	0.0323088035797899	MYL12A
ENSG00000067365	470.386148768122	0.170171188640146	0.0521532887794185	3.2629042697553	0.00110276763644037	0.0323088035797899	METTL22
ENSG00000105053	1986.32463663932	0.189681145763195	0.0581724753492264	3.26066829070765	0.00111149986182928	0.0323088035797899	VRK3
ENSG00000075624	124928.36635247	0.248405909994893	0.0761553212838351	3.26183260482968	0.00110694488972607	0.0323088035797899	ACTB
ENSG00000198692	2368.39221325063	0.29580343656515	0.0906233553730579	3.26409715627338	0.00109813501885278	0.0323088035797899	EIF1AY
ENSG00000150540	950.269588352208	0.325530283025551	0.0998032720090651	3.26171954558748	0.00110738643665016	0.0323088035797899	HNMT
ENSG00000198736	14339.8524855396	0.360811973290444	0.110751342674434	3.25785642482993	0.00112257186643116	0.0323088035797899	MSRB1
ENSG00000065833	74.8059654706977	0.41335005188813	0.126862296345818	3.25825768407476	0.00112098565481628	0.0323088035797899	ME1
ENSG00000124134	23.8109479688233	0.805710537798181	0.247234315267394	3.25889444969148	0.00111847271965416	0.0323088035797899	KCNS1
ENSG00000112182	1268.60664983162	-0.363978887963425	0.111817153217519	-3.25512568948499	0.00113342192890518	0.0324390839656835	BACH2
ENSG00000120942	749.178402872072	-0.144631242203354	0.0444251548377485	-3.25561593947355	0.0011314669007102	0.0324390839656835	UBIAD1
ENSG00000178585	597.33926334923	0.194165648812191	0.0596685529275298	3.25407001319463	0.00113764238153213	0.0324390839656835	CTNNBIP1
ENSG00000104915	3515.89559020694	0.279893657119398	0.0860227088564878	3.2537182430089	0.00113905193544328	0.0324390839656835	STX10
ENSG00000207031	11.9693154670929	0.586917864851546	0.180365411902412	3.2540488703516	0.00113772705598678	0.0324390839656835	SNORD59A
ENSG00000240053	119.295945630392	0.355376052376749	0.109242266165071	3.25310033242771	0.00114153183128374	0.0324529730045587	LY6G5B
ENSG00000198899	84652.6833405245	-0.255971608147216	0.0787322906282992	-3.25116424410508	0.00114933439858584	0.0326178699528979	MT-ATP6
ENSG00000103187	29224.3363628321	0.244253242243708	0.0751454967757938	3.25040425206674	0.00115241066826911	0.0326482952801806	COTL1
ENSG00000239839	1124.86874034307	1.57102860558817	0.483469539990057	3.24948828342005	0.00115612840748401	0.0326967565241571	DEFA3
ENSG00000104218	413.528088393331	-0.209139347829243	0.0644168484204353	-3.24665600627081	0.00116769431569672	0.0328527468094985	CSPP1
ENSG00000179195	1855.33538007602	-0.197592973381479	0.0608575475727307	-3.246811303813	0.00116705738100447	0.0328527468094985	ZNF664
ENSG00000023902	6173.37136096651	0.211031564815741	0.0649852575515432	3.24737598598207	0.0011647441083741	0.0328527468094985	PLEKHO1
ENSG00000064651	317.451225859474	-0.25601367728217	0.0789106852454555	-3.24434740980676	0.00117720071443698	0.0330061955906685	SLC12A2
ENSG00000203896	82.9889682332515	0.361513030262378	0.111424132544655	3.24447695491366	0.00117666538203569	0.0330061955906685	LIME1
ENSG00000109103	3399.04626364491	0.265560240249409	0.0820726411314872	3.235673137702	0.00121356262561124	0.0339672425622114	UNC119
ENSG00000084234	19953.4053439215	0.202292427566917	0.0625462173950047	3.23428715583803	0.00121946777781335	0.0340739795893301	APLP2
ENSG00000160593	46258.348287426	0.283106781626773	0.0875499070359387	3.23366170463847	0.00122214127334052	0.0340902077786251	JAML
ENSG00000100106	2462.81808122607	0.31392972649449	0.0971441398237739	3.23158686734969	0.00123104899470578	0.0342214814398587	TRIOBP
ENSG00000170412	37.732131216007	0.670239981666096	0.207374252740712	3.23203084668435	0.00122913786889421	0.0342214814398587	GPRC5C
ENSG00000169991	1059.66323225968	-0.232210980274484	0.0719439309281206	-3.22766600710888	0.00124804600704553	0.0342844341564447	IFFO2
ENSG00000160691	1854.96067989764	0.116693810076125	0.0361482257135911	3.22820298292678	0.00124570546798613	0.0342844341564447	SHC1
ENSG00000077549	12855.4051712744	0.164014252516721	0.0508021545117258	3.22849009245985	0.00124445569517049	0.0342844341564447	CAPZB
ENSG00000134046	4110.59041308715	0.180021844884899	0.0557599942827793	3.22851261375571	0.00124435771013411	0.0342844341564447	MBD2
ENSG00000115128	1937.53760780183	0.248999657206871	0.0771394067124053	3.22791771182792	0.00124694838597048	0.0342844341564447	SF3B6
ENSG00000213654	15174.2793082436	0.279943347689435	0.0867103373309326	3.22848873971073	0.00124446158090109	0.0342844341564447	GPSM3
ENSG00000261471	147.654516791121	0.519998218219279	0.161083375085993	3.22813088527405	0.00124601948731441	0.0342844341564447	RP11-61F12.1
ENSG00000138002	280.058779532994	-0.23417606365845	0.0725762714458837	-3.22662020234896	0.00125261605976299	0.0343520464874396	IFT172
ENSG00000251301	203.014023521933	-0.566570834780926	0.175640865379403	-3.22573470335092	0.00125649766893148	0.0343591284423714	RP11-81H14.2
ENSG00000172785	191.989016262762	0.311810887540893	0.0966675865079306	3.22559917760347	0.00125709272876939	0.0343591284423714	CBWD1
ENSG00000152465	570.396011474773	-0.286830687184946	0.0889631183989859	-3.22415279889981	0.00126345964448181	0.0343874935417948	NMT2
ENSG00000087995	157.949986561436	-0.200816685592236	0.0622879312713445	-3.22400634430159	0.00126410599041673	0.0343874935417948	METTL2A
ENSG00000118096	224.145003643861	-0.173060152047882	0.0536799494553817	-3.22392539120642	0.00126446339051781	0.0343874935417948	IFT46
ENSG00000177885	15318.6136610515	0.179912192488446	0.0558146179206761	3.22338840954062	0.00126683647554181	0.0343946103109601	GRB2
ENSG00000175354	1844.96540561459	0.139515856959731	0.0433247779669196	3.22023247450357	0.00128086680499216	0.0347176709705862	PTPN2
ENSG00000149923	3700.75448370935	0.259902424672969	0.0807648826115772	3.21801278314139	0.0012908206485014	0.0347409894647711	PPP4C
ENSG00000104805	5477.3738234183	0.297721856615513	0.0925479677838614	3.2169464521449	0.00129562778029365	0.0347409894647711	NUCB1
ENSG00000133318	9974.04105908162	0.30140706974653	0.0937001579775042	3.21671890690827	0.00129665571483001	0.0347409894647711	RTN3
ENSG00000143797	1791.82706023483	0.311773263170665	0.096920223551826	3.21680297202318	0.00129627586342597	0.0347409894647711	MBOAT2
ENSG00000239998	9308.76835148666	0.347892026874901	0.108092195251514	3.21847498855406	0.00128874209694362	0.0347409894647711	LILRA2
ENSG00000277855	12.368294283984	0.47546936211528	0.147721410196433	3.21868956898681	0.00128777817275633	0.0347409894647711	RP11-154H23.4
ENSG00000172322	7874.49595011908	0.807023034775712	0.250863291590812	3.21698336037169	0.00129546111846233	0.0347409894647711	CLEC12A
ENSG00000196867	181.781502399437	-0.310770347534437	0.0966302599033367	-3.21607690846857	0.00129955999895358	0.0347616295286599	ZFP28
ENSG00000130755	16413.2214556746	0.266555747717878	0.0828986840166326	3.21544003840154	0.00130244701420613	0.0347817407564228	GMFG
ENSG00000125245	425.083047705679	-0.382600273408636	0.119162253102497	-3.2107505812226	0.00132388787684675	0.034913574318124	GPR18
ENSG00000103522	785.687309941674	-0.244614175031656	0.0761892839853388	-3.21061128594839	0.00132452970709642	0.034913574318124	IL21R
ENSG00000163935	469.283395517626	-0.223226362680925	0.0695056725158131	-3.21162798086932	0.00131985167855202	0.034913574318124	SFMBT1
ENSG00000163655	1045.54507886167	-0.114405414204104	0.0356266592367206	-3.21123048456324	0.00132167882510903	0.034913574318124	GMPS
ENSG00000047249	851.899766997988	0.144989369590148	0.0451279782470922	3.21284877413028	0.00131425469573766	0.034913574318124	ATP6V1H
ENSG00000159346	6781.59019630406	0.23146012552825	0.0720772657320059	3.21127783050003	0.00132146107060522	0.034913574318124	ADIPOR1
ENSG00000163932	8897.60639875069	0.245224957542882	0.0763740711163295	3.21084045879088	0.00132347390068759	0.034913574318124	PRKCD
ENSG00000103507	1491.92204325765	0.289799884473003	0.0901957316340558	3.2130110729495	0.00131351225445348	0.034913574318124	BCKDK
ENSG00000114353	31523.3550396387	0.223492788255546	0.0696302753164492	3.20970708847319	0.00132870295974447	0.0349669971150848	GNAI2
ENSG00000125780	347.074865994278	0.763054306920776	0.237771024796641	3.20919804073434	0.00133105776414561	0.0349724693192452	TGM3
ENSG00000111674	884.554022715065	-0.269912288951985	0.0841816676244834	-3.2063072230406	0.00134450358160916	0.0350431413510612	ENO2
ENSG00000117174	645.883864365489	-0.219743943921925	0.0685262179144768	-3.20671343917117	0.00134260664586377	0.0350431413510612	ZNHIT6
ENSG00000172757	28624.494203816	0.207962693675789	0.0648475687474589	3.20694665494206	0.00134151869795056	0.0350431413510612	CFL1
ENSG00000150977	3656.00974116957	0.225010917545671	0.0701481371542934	3.20765349834952	0.00133822625080184	0.0350431413510612	RILPL2
ENSG00000225217	481.03925760489	0.592948749338106	0.184849963905431	3.20772986269805	0.00133787099542052	0.0350431413510612	HSPA7
ENSG00000279673	49.3838834408912	-0.284315742156101	0.0887266071496261	-3.20440227897635	0.00135343226041851	0.0351633357611124	RP11-185E8.2
ENSG00000132823	2919.11387090722	0.219606994213585	0.0685301436884668	3.20453135501806	0.00135282554378953	0.0351633357611124	OSER1
ENSG00000109016	377.599772492305	0.217194366220562	0.0678041208256712	3.20326203740599	0.00135880283189506	0.0351906170613204	DHRS7B
ENSG00000160055	353.269168618639	0.248638964653974	0.0776175512758468	3.20338583950336	0.00135821877049955	0.0351906170613204	TMEM234
ENSG00000082898	6026.2108956771	-0.198528720372871	0.0620204105673789	-3.20102234984707	0.0013694090974847	0.0352512677333828	XPO1
ENSG00000230989	3179.24579099218	0.192671810367543	0.0601922597307498	3.20093997516286	0.00136980064304673	0.0352512677333828	HSBP1
ENSG00000106245	1813.88417777958	0.202328536894371	0.0632065837176472	3.20106743623736	0.0013691948353579	0.0352512677333828	BUD31
ENSG00000183023	1891.47501832282	0.315507979404153	0.0985442433850564	3.20168858744312	0.0013662461107265	0.0352512677333828	SLC8A1
ENSG00000259768	31.0284202065431	-0.341058119657362	0.106594377239417	-3.19958827557412	0.00137624034429549	0.0353054412733441	RP5-991G20.1
ENSG00000256660	465.337671309912	0.711878663857513	0.222465393030634	3.19995237982694	0.0013745029545183	0.0353054412733441	CLEC12B
ENSG00000163644	1571.44115871155	-0.255475434046479	0.0799790431003933	-3.19427970306915	0.00140180227734452	0.0354036575161895	PPM1K
ENSG00000188042	7022.71442778477	-0.245468033604977	0.0767752782607099	-3.19722753425169	0.00138755427979426	0.0354036575161895	ARL4C
ENSG00000068697	4339.64787171956	0.173809296895024	0.0543640189712725	3.19713847842761	0.00138798275709005	0.0354036575161895	LAPTM4A
ENSG00000132424	12418.4329411732	0.189004964333905	0.0591645130955091	3.19456637847749	0.00140041076664453	0.0354036575161895	PNISR
ENSG00000104904	29253.9499697155	0.231983041349075	0.0725732032234398	3.19653854377684	0.00139087242413606	0.0354036575161895	OAZ1
ENSG00000267796	126.707579403228	0.232230783307808	0.0726615291615296	3.19606242791215	0.00139316964845047	0.0354036575161895	LIN37
ENSG00000130725	1035.48039649695	0.236150570171759	0.0738824072234701	3.19630313962945	0.00139200779503772	0.0354036575161895	UBE2M
ENSG00000198223	4074.28588328026	0.301177795888753	0.0942662445833757	3.19496970755391	0.00139845518027655	0.0354036575161895	CSF2RA
ENSG00000160211	5291.02511316274	0.324748219381107	0.101609756043384	3.19603384582925	0.00139330766617695	0.0354036575161895	G6PD
ENSG00000179542	177.903663564925	0.360586892160521	0.112881836480661	3.19437478519669	0.00140134061134861	0.0354036575161895	SLITRK4
ENSG00000105058	3151.84289208876	0.147312939818302	0.0461465194546552	3.19228712282528	0.00141150946274251	0.0355386231036716	FAM32A
ENSG00000023330	1486.61635614655	0.20131802285795	0.0630616966343228	3.192397819953	0.00141096856156455	0.0355386231036716	ALAS1
ENSG00000115998	472.689851707916	-0.157834075368489	0.049478735151541	-3.18993755368003	0.00142303538986227	0.0357184075513966	C2orf42
ENSG00000070540	877.290579013817	0.258530994096754	0.081039063844876	3.19020213006941	0.00142173317586276	0.0357184075513966	WIPI1
ENSG00000197363	177.71938326235	-0.19363698268101	0.0607241613545851	-3.18879632689055	0.00142866498483745	0.035804542466157	ZNF517
ENSG00000172830	936.761187201344	0.304400258702888	0.0954969758966207	3.18753820050191	0.00143489502575909	0.0358503680515576	SSH3
ENSG00000065618	67.2513786267788	1.19860544774594	0.376009528754799	3.18769966206779	0.00143409409552644	0.0358503680515576	COL17A1
ENSG00000182919	846.752423401313	0.221582493217131	0.0695310520066304	3.1868134714257	0.00143849512654126	0.0358852765870707	C11orf54
ENSG00000196502	1907.08839587041	0.488744180671036	0.153527045545631	3.18344027877338	0.00145536132161581	0.036250513653091	SULT1A1
ENSG00000158864	2714.34841972742	0.139224865864914	0.0437405698149122	3.18296872798052	0.00145773357452729	0.0362541678306101	NDUFS2
ENSG00000210077	111.980804448841	-0.592146027819083	0.186089645171377	-3.18204716481541	0.0014623800170442	0.0363028463685399	MT-TV
ENSG00000101425	806.900725376192	1.02648856876262	0.322622957376252	3.18169722672744	0.00146414794746045	0.0363028463685399	BPI
ENSG00000117461	117.486306104513	-0.350926637246922	0.110331315756567	-3.18066212516853	0.00146938894481256	0.0363774253966515	PIK3R3
ENSG00000131238	13998.2872272453	0.299866227941161	0.0943008867742914	3.17988767866933	0.00147332147577286	0.0364194337486189	PPT1
ENSG00000165025	10804.6807621003	0.2133821765394	0.0671156849598246	3.17931906181289	0.00147621500463947	0.0364356703417832	SYK
ENSG00000159339	5501.91159679559	0.481739719809874	0.151579780873264	3.17812650892178	0.00148230058129492	0.0365305241592955	PADI4
ENSG00000100603	2870.20247247511	0.107293190275187	0.0337705749432821	3.17712062810263	0.00148745153628737	0.0366020929397601	SNW1
ENSG00000104490	606.298176978377	-0.324622298408797	0.102219903281585	-3.17572496145452	0.00149462584179462	0.0367214846265853	NCALD
ENSG00000160883	7642.17828842369	0.351377868186665	0.110659706598744	3.17530092015132	0.00149681189638138	0.0367214846265853	HK3
ENSG00000172819	503.517474529126	-0.211458395074658	0.0666367309196809	-3.17330085309159	0.00150716258540261	0.0368091132177039	RARG
ENSG00000254996	104.357317489535	0.243279840469568	0.0766588896048561	3.17353723388862	0.00150593584753379	0.0368091132177039	ANKHD1-EIF4EBP3
ENSG00000106605	1188.5147000001	0.303157818459894	0.0955174947118055	3.17384599935938	0.00150433484272266	0.0368091132177039	BLVRA
ENSG00000079215	37.4774625026444	0.442166676110539	0.139393072255946	3.17208501796027	0.00151348692390622	0.0369082365126232	SLC1A3
ENSG00000105245	139.249322306596	-0.261907726696226	0.0826071616320299	-3.17052083042004	0.0015216592230052	0.0369967593175443	NUMBL
ENSG00000206053	805.802613074921	-0.131794107421494	0.0415682703418976	-3.17054585955807	0.00152152813567446	0.0369967593175443	HN1L
ENSG00000198715	677.05599706692	0.295648334446731	0.093320435058678	3.16809854412737	0.00153439501164931	0.0372323430822155	GLMP
ENSG00000124107	1207.40911965555	0.565827813788313	0.178666726825334	3.16694565262547	0.00154049105202046	0.0372323430822155	SLPI
ENSG00000163661	114.296164092508	0.588756596331345	0.185899414562133	3.16707073940012	0.00153982856486539	0.0372323430822155	PTX3
ENSG00000284874	12.4978785573624	0.811244366757239	0.256122976061015	3.16740176626708	0.00153807663932978	0.0372323430822155	ENSG00000284874
ENSG00000173171	643.41670201381	0.327329754875631	0.103430683383048	3.16472582573385	0.00155229149452537	0.037461968067879	MTX1
ENSG00000172927	45.7406927469484	-0.656448094151991	0.207739553843875	-3.15995717717455	0.00157792328796454	0.0379623170698763	MYEOV
ENSG00000115165	8598.68662597652	0.175504056567282	0.0555454735858256	3.15964641648258	0.00157960709634775	0.0379623170698763	CYTIP
ENSG00000269220	441.24958336156	0.297083738004633	0.0940266030081077	3.15957110541382	0.00158001540659153	0.0379623170698763	LINC00528
ENSG00000130749	1534.9559468922	-0.173358133353105	0.0548781625348851	-3.15896388190666	0.00158331111182495	0.0379854757166839	ZC3H4
ENSG00000196417	524.672649721929	-0.182526682368059	0.0577895051370179	-3.15847456965225	0.0015859714573368	0.0379933456470832	ZNF765
ENSG00000211654	19.5241871885064	-1.66969113241429	0.528821791690764	-3.15737959110178	0.00159193966958447	0.0380244827236525	IGLV5-37
ENSG00000259529	37.8175887695206	0.442898847750072	0.140264639686914	3.15759444959663	0.0015907669491931	0.0380244827236525	RP11-468E2.4
ENSG00000211632	16.2047551208149	-0.893011647766979	0.282951492283625	-3.15605915543942	0.00159916423950903	0.0380861696307752	IGKV3D-11
ENSG00000213928	703.484265074707	0.347102855171362	0.109980048203364	3.15605294634474	0.00159919828283918	0.0380861696307752	IRF9
ENSG00000176160	43.8155041881136	-0.363809271028712	0.115322102402834	-3.15472284539074	0.00160650638081064	0.0381494685488961	HSF5
ENSG00000211765	53.8669357032985	-0.320357221814332	0.101555166881544	-3.15451425714265	0.0016076552311823	0.0381494685488961	TRBJ2-2
ENSG00000132478	723.968207481631	-0.126476603246248	0.0400972103193993	-3.15424944126494	0.00160911485833991	0.0381494685488961	UNK
ENSG00000158825	3814.85337979501	0.471951321120529	0.149642101934995	3.15386722732315	0.00161122371771888	0.0381494685488961	CDA
ENSG00000138185	4067.8832432365	0.273785356596392	0.0868234598180313	3.15335690572807	0.00161404337491789	0.0381607642632982	ENTPD1
ENSG00000136014	96.1336222201724	-0.40339514784852	0.127978067849681	-3.15206468285125	0.00162120355955447	0.0381638814814194	USP44
ENSG00000177613	1884.42557257244	-0.130982500138455	0.0415523183584891	-3.15223085769643	0.0016202811524491	0.0381638814814194	CSTF2T
ENSG00000186105	28.2863142197472	0.589317422573116	0.186942850545049	3.15239347669573	0.00161937895087147	0.0381638814814194	LRRC70
ENSG00000275004	75.4647562835089	-0.306586471115223	0.0973237917051735	-3.15016981709854	0.0016317558537315	0.038328072782177	ZNF280B
ENSG00000100941	5980.64619477008	0.179131667198336	0.0568677757878154	3.14996788104937	0.00163288413203382	0.038328072782177	PNN
ENSG00000138772	2067.44540397691	0.589871080979352	0.187353695273149	3.14843579743309	0.00164146776576816	0.038474114970307	ANXA3
ENSG00000115944	2228.82710433855	0.169935277240079	0.0539870860848076	3.1477023407622	0.00164559170132347	0.038515357492183	COX7A2L
ENSG00000171720	2025.99417620558	0.110317139728009	0.0350627724459557	3.14627543780365	0.00165364193790008	0.0386482455787552	HDAC3
ENSG00000139977	697.171676497204	-0.229801484592196	0.0730924230476684	-3.14398503990389	0.00166663959759863	0.0387416051469463	NAA30
ENSG00000185163	600.474939912475	-0.154346215459575	0.0490820471374632	-3.14465725170958	0.00166281518625407	0.0387416051469463	DDX51
ENSG00000272106	99.1864191619668	0.350670053025974	0.111539982917855	3.14389552385201	0.00166714949097664	0.0387416051469463	RP11-345P4.9
ENSG00000185271	34.8817555381469	0.913478830191304	0.290456525575233	3.14497609713608	0.00166100400518635	0.0387416051469463	KLHL33
ENSG00000126803	16.7379482988154	-0.694868831402711	0.221166637519638	-3.14183386425546	0.00167893272344725	0.0387641261093625	HSPA2
ENSG00000183495	1721.08781787509	-0.216960347228902	0.069040699930259	-3.14249924244776	0.00167512146637186	0.0387641261093625	EP400
ENSG00000169714	15868.1304873145	0.139643100656765	0.0444325545574981	3.14281053717179	0.00167334111822361	0.0387641261093625	CNBP
ENSG00000130066	35257.5594706057	0.314372308402989	0.100051508682158	3.14210462734431	0.00167738084277663	0.0387641261093625	SAT1
ENSG00000255423	112.41351668789	0.519468163590341	0.165349104061402	3.14164486429534	0.00168001676078637	0.0387641261093625	EBLN2
ENSG00000124102	3226.66813488169	0.596214818078641	0.189845965389022	3.14051877192602	0.00168648898912591	0.0388080430875972	PI3
ENSG00000257017	276.635681060387	0.960431148824619	0.305822577650005	3.14048477455374	0.00168668474561196	0.0388080430875972	HP
ENSG00000134954	24564.2498270308	-0.248049675254005	0.0790053697676489	-3.13965589913075	0.00169146387269316	0.0388083753326359	ETS1
ENSG00000106608	604.764031646823	-0.178734188631512	0.056925312991826	-3.13980159682523	0.00169062290813374	0.0388083753326359	URGCP
ENSG00000214787	41.7530988715674	0.454760365020956	0.144869561690919	3.13910223592167	0.00169466311778029	0.0388270916858521	MS4A4E
ENSG00000123609	4493.52834037761	0.271513253684405	0.0865474600542563	3.13716027615593	0.0017059284388868	0.0390303009402611	NMI
ENSG00000130844	561.499368189466	-0.237518476397186	0.0757460014210137	-3.13572296809443	0.0017143105820137	0.0391562669958626	ZNF331
ENSG00000107874	836.269119369612	0.195917051224555	0.062485648553538	3.13539277833841	0.00171624153683523	0.0391562669958626	CUEDC2
ENSG00000132334	9668.49798882007	0.202920612917353	0.0647516605752818	3.13382870978935	0.00172541544181012	0.0392834670927052	PTPRE
ENSG00000157557	3196.70159792618	0.228695257479452	0.0729811584281232	3.13362054542731	0.00172663980591632	0.0392834670927052	ETS2
ENSG00000151090	16.6386418624228	-0.584880467253301	0.186829627195977	-3.1305552338323	0.00174476185408548	0.0395851958259784	THRB
ENSG00000134014	971.732693897629	-0.1418597283992	0.0453116815512379	-3.13075400300001	0.00174358145371005	0.0395851958259784	ELP3
ENSG00000151532	1216.19542095613	0.11164145019805	0.035668966966876	3.12993225460457	0.00174846620857391	0.0396140675071892	VTI1A
ENSG00000117118	2042.13483340939	0.224140506012597	0.071621543525626	3.12951236428464	0.00175096703532839	0.0396156291743049	SDHB
ENSG00000274173	160.325848136024	0.845068389890099	0.270181399675158	3.12778152347324	0.00176131051649418	0.0397943804628159	RP4-568C11.4
ENSG00000085511	1184.02477259361	-0.166331449723899	0.0531977700243344	-3.12666206962836	0.00176803024148847	0.039804582049401	MAP3K4
ENSG00000170248	5524.50179497373	0.118628724771948	0.0379431557799881	3.12648545787314	0.00176909253552893	0.039804582049401	PDCD6IP
ENSG00000158552	1624.88522266579	0.203817391820356	0.0651809518244378	3.12694715427491	0.00176631673597841	0.039804582049401	ZFAND2B
ENSG00000086061	5990.71753436381	0.166962550103094	0.0534225894942264	3.12531743001972	0.00177613283872971	0.0399078675074579	DNAJA1
ENSG00000210176	11.2684724676559	-0.773158037577361	0.247462065159709	-3.12434973448708	0.00178198513457446	0.0399842119038815	MT-TH
ENSG00000114423	1548.46220563442	-0.283832139550716	0.090905466820888	-3.12227800457758	0.00179457389884527	0.0402112913510171	CBLB
ENSG00000075884	4330.57616115541	0.218808835357551	0.0700942084734037	3.12163929264678	0.00179847145384906	0.0402432692076939	ARHGAP15
ENSG00000142657	11331.6313431951	0.287361652913884	0.0921013242937435	3.12005994612398	0.00180814238724353	0.0404041693939604	PGD
ENSG00000182149	6588.42319712718	0.117567441696094	0.0376967124795932	3.11877174328499	0.00181606590305481	0.0405256350147437	IST1
ENSG00000131634	606.94668269351	-0.44591863171905	0.143080405627241	-3.11655973970871	0.0018297460351284	0.0405531468193765	TMEM204
ENSG00000198890	412.948431422898	-0.169349391229449	0.0543270976133282	-3.11721771766254	0.00182566690991478	0.0405531468193765	PRMT6
ENSG00000117308	228.442805997754	0.160384084090387	0.0514581195160808	3.11678867394808	0.00182832581140824	0.0405531468193765	GALE
ENSG00000165233	1313.43004941299	0.277613984981311	0.0890407382913485	3.11783112212003	0.00182187164563161	0.0405531468193765	CARD19
ENSG00000086504	1252.10064148994	0.290483361900497	0.0931749812303351	3.11761116626792	0.0018232317248576	0.0405531468193765	MRPL28
ENSG00000074319	2321.55831794347	0.169891552055752	0.0545307737995803	3.11551698642977	0.00183622772578078	0.0406415076806642	TSG101
ENSG00000211692	10.5553589437388	-0.647725900158487	0.208061641533938	-3.11314423640569	0.00185105529181973	0.0409140986482273	TRGJP1
ENSG00000254995	137.16033884405	0.389445917180202	0.125120093553298	3.11257693405023	0.00185461668093163	0.0409372706400763	STX16-NPEPL1
ENSG00000140350	10501.512565309	0.225778418583334	0.072559176359918	3.11164527920489	0.00186047904882861	0.0409556806829973	ANP32A
ENSG00000223773	140.028039172823	0.236606739063833	0.0760334325776883	3.11187764437804	0.00185901531714026	0.0409556806829973	CD99P1
ENSG00000117586	318.721495579756	-0.397661185181519	0.127842967478612	-3.11054407625548	0.00186743023620561	0.0409978956169669	TNFSF4
ENSG00000104043	801.471581354326	0.290476348816861	0.093375108922228	3.11085418983338	0.00186547027879316	0.0409978956169669	ATP8B4
ENSG00000198589	2211.11817859298	-0.268004305080444	0.0862052579286911	-3.10890903316057	0.00187779523294547	0.0411146294955398	LRBA
ENSG00000165119	18101.2694072485	0.108750460258327	0.0349797745492574	3.10895257787292	0.00187751850722668	0.0411146294955398	HNRNPK
ENSG00000204104	207.945189296447	-0.18497111057479	0.0595097602048135	-3.1082482930225	0.00188199882235088	0.0411513568001287	TRAF3IP1
ENSG00000205710	27.0373021253859	0.965874016600466	0.310814116065865	3.10756161536687	0.00188637658241046	0.0411917889108128	C17orf107
ENSG00000157379	601.954990163395	0.185913862584647	0.0598545129803096	3.10609598721164	0.00189575167104308	0.0413410906576865	DHRS1
ENSG00000187699	1041.46067285606	-0.447824893109149	0.14419632910312	-3.10566084375763	0.00189854335255227	0.0413466192688189	C2orf88
ENSG00000186272	291.96953804589	-0.189223516943188	0.0609556197606889	-3.10428337347857	0.0019074054848174	0.0414700659314304	ZNF17
ENSG00000271605	566.686170375959	0.386816266203626	0.124619077402187	3.10398916656429	0.00190930321967912	0.0414700659314304	MILR1
ENSG00000058056	246.312538054922	-0.224069612412424	0.0722632393170073	-3.10074132477603	0.00193036844030343	0.0416041911218113	USP13
ENSG00000164284	643.347381470888	-0.200347933651222	0.0645865296624295	-3.10200803013211	0.00192212744291049	0.0416041911218113	GRPEL2
ENSG00000136888	4658.87848113726	0.146908063070303	0.0473833110036613	3.10041784667499	0.00193247813494842	0.0416041911218113	ATP6V1G1
ENSG00000108523	4991.90380709698	0.165267323780782	0.0532669095285291	3.10262647567844	0.00191811567603175	0.0416041911218113	RNF167
ENSG00000267121	1457.30763991441	0.1984737073026	0.0639944794942135	3.10141919851925	0.00192595426744308	0.0416041911218113	CTD-2020K17.1
ENSG00000139192	1827.45130015473	0.237676043084193	0.076662685154599	3.10028330738602	0.00193335621112408	0.0416041911218113	TAPBPL
ENSG00000226450	20.6099398483876	0.466571728724157	0.15045707075171	3.10102892734175	0.00192849449885063	0.0416041911218113	CYP2D8P
ENSG00000112695	2170.38122735058	0.225905290097326	0.07288560721332	3.09944992892975	0.00193880345755819	0.0416114734171581	COX7A2
ENSG00000177706	183.79662061759	0.429430772834126	0.138542104928922	3.09964088573969	0.00193755405551562	0.0416114734171581	FAM20C
ENSG00000197471	7184.63198276566	-0.251682897373091	0.0812692951359949	-3.09690021245943	0.00195555690469089	0.0418229065824267	SPN
ENSG00000271601	1464.09098604698	-0.165043482288825	0.053307592331383	-3.0960595868379	0.00196110947765749	0.0418229065824267	LIX1L
ENSG00000152382	458.669954385799	-0.152221026166381	0.0491531882486812	-3.096869838763	0.00195575728006555	0.0418229065824267	TADA1
ENSG00000120705	3053.87944528111	0.222444648468546	0.0718451627200941	3.09616736947457	0.00196039673446882	0.0418229065824267	ETF1
ENSG00000086730	9288.63987178618	0.240398907735894	0.0776481810349827	3.09600179336574	0.00196149175131823	0.0418229065824267	LAT2
ENSG00000197124	128.236873209043	-0.308837860079626	0.0997866555743378	-3.09498157145423	0.00196825125917081	0.0419121738717549	ZNF682
ENSG00000104870	10582.8945812091	0.339771137072021	0.109830728414382	3.09358903448308	0.00197751206524325	0.0420544014919224	FCGRT
ENSG00000008394	569.68931722943	0.350676174641049	0.113405658142788	3.09222820434159	0.00198660063574212	0.0421926002037015	MGST1
ENSG00000158691	313.820790826342	-0.274031047325621	0.0886762424542504	-3.09024198298658	0.00199993483553346	0.0423653296109753	ZSCAN12
ENSG00000147533	2819.96532878207	0.139435700451994	0.045119085896863	3.09039284995107	0.00199891913738521	0.0423653296109753	GOLGA7
ENSG00000050130	1861.51717158677	0.142556441597794	0.046150852019525	3.08892328872895	0.00200883301019833	0.0424985580988712	JKAMP
ENSG00000224914	19.9256308683545	-0.444825145736289	0.144040927430486	-3.08818579324243	0.00201382524783172	0.0425075916759683	LINC00863
ENSG00000101160	11326.7677365917	0.252680250020223	0.0818241380477597	3.08808935906831	0.00201447886886725	0.0425075916759683	CTSZ
ENSG00000126768	1078.86928810086	0.204412500752422	0.0662040933835087	3.08761120809096	0.00201772260429844	0.042520958892654	TIMM17B
ENSG00000184574	359.207301867431	-0.280696495171245	0.0909417427047402	-3.08655285046142	0.00202491946485534	0.042617491062653	LPAR5
ENSG00000103035	2481.13233675059	0.13358492275121	0.0432938789908323	3.08553832239189	0.00203184038797395	0.0427079740904459	PSMD7
ENSG00000133895	742.114921102484	-0.151223460933267	0.0490201293708834	-3.08492578200108	0.00203602952711405	0.0427089088694877	MEN1
ENSG00000154589	1899.36579492304	0.389799962139497	0.126362924073471	3.08476529011672	0.00203712843410632	0.0427089088694877	LY96
ENSG00000111664	18.2062266154614	-0.669837031428558	0.217272344650713	-3.08293737293344	0.00204968285368306	0.0427522151849296	GNB3
ENSG00000168795	624.421172022109	-0.141329299499268	0.0458471999246907	-3.08261572640025	0.00205189930248431	0.0427522151849296	ZBTB5
ENSG00000141452	1365.10483788572	0.10312112207937	0.0334494378301731	3.08289552138152	0.00204997112609159	0.0427522151849296	C18orf8
ENSG00000242299	64.8030737515168	0.442044537691529	0.143401983671666	3.08255525044645	0.00205231628450675	0.0427522151849296	RP11-234A1.1
ENSG00000128271	10.0651640311386	0.858060644637671	0.278246520082655	3.08381446920801	0.0020436499879232	0.0427522151849296	ADORA2A
ENSG00000177868	489.179644456664	0.207788062435404	0.067462743648235	3.08004168224843	0.00206971627012374	0.0430596143554479	SVBP
ENSG00000115129	212.437026101442	0.334334190610375	0.108592682446266	3.07879115865666	0.00207842324200862	0.0431856053728576	TP53I3
ENSG00000115590	3406.00663231056	0.453116210985818	0.147214882164285	3.07792394576088	0.00208448106688592	0.0432563013752505	IL1R2
ENSG00000270647	4448.77588085915	-0.13561094543998	0.0440684831773202	-3.07727735702444	0.00208900827914936	0.0432573333060821	TAF15
ENSG00000163541	1596.32673870844	0.155400989372664	0.0505076710933894	3.07677994270069	0.00209249715440102	0.0432573333060821	SUCLG1
ENSG00000072110	13064.284169017	0.303601540259732	0.0986636144354644	3.07713782833607	0.00208998639770039	0.0432573333060821	ACTN1
ENSG00000131378	1601.11337305955	-0.166023998821377	0.0539825416130064	-3.07551282063709	0.00210140893842955	0.0432768035486945	RFTN1
ENSG00000151948	5950.58205135304	0.280409019021336	0.0911607046666821	3.07598564586153	0.00209807945265806	0.0432768035486945	GLT1D1
ENSG00000272758	129.054663785581	0.35310197238701	0.114802344668087	3.07573833450777	0.00209982033706147	0.0432768035486945	RP11-299J3.8
ENSG00000119801	7433.35357305844	0.231289621428183	0.0752315480092655	3.0743700953714	0.00210947566600188	0.0433880790393568	YPEL5
ENSG00000136866	99.4117922717651	-0.414819743475258	0.135052296546056	-3.07154897831593	0.00212951224382055	0.0436440294102917	ZFP37
ENSG00000111011	3987.47705725664	0.0911672635732873	0.0296801319234893	3.07165964788506	0.00212872295184548	0.0436440294102917	RSRC2
ENSG00000078369	13657.7021556695	0.109393104063897	0.0356200390041762	3.07111129359154	0.00213263642790621	0.0436440294102917	GNB1
ENSG00000112303	34345.7504771542	0.35544674639511	0.11573324963862	3.07125867030435	0.00213158398710492	0.0436440294102917	VNN2
ENSG00000113966	106.592987187104	-0.273905607743931	0.0892230468095828	-3.06989749328436	0.00214132251026758	0.0437119595141089	ARL6
ENSG00000172890	4325.80130725778	0.149873644011244	0.0488163997734915	3.0701494724449	0.0021395166574329	0.0437119595141089	NADSYN1
ENSG00000125741	607.672519469738	-0.117591280089871	0.0383148378586852	-3.06907941313957	0.00214719506353588	0.0437501131850145	OPA3
ENSG00000275560	139.638468560712	0.322027216663758	0.104932827695846	3.06888915256504	0.00214856295567904	0.0437501131850145	RP11-180M15.7
ENSG00000087086	82403.996007614	0.275386289775107	0.0897526006718766	3.06828200758084	0.002152933413035	0.0437843761527343	FTL
ENSG00000167770	2529.32697477345	0.187738619707685	0.0612204889619707	3.06659784805551	0.00216509932215795	0.0439768927156522	OTUB1
ENSG00000147234	87.0581891672613	-0.537001335728042	0.175163825116363	-3.06570911757212	0.00217154464260244	0.0440295024457338	FRMPD3
ENSG00000134283	2388.44704047475	0.127895021809012	0.0417208292051901	3.06549568274405	0.00217309514833456	0.0440295024457338	PPHLN1
ENSG00000147117	13.1642771206579	-0.628797897697485	0.205214046434692	-3.06410749469626	0.00218320448627387	0.0441619981900419	ZNF157
ENSG00000177042	597.886420394325	0.248716216488517	0.0811775728299539	3.06385381846182	0.0021850565095871	0.0441619981900419	TMEM80
ENSG00000136827	1601.50928637341	0.159935822099895	0.0522097435260521	3.06333284361163	0.00218886452613164	0.0441841426650364	TOR1A
ENSG00000135144	213.55871233935	-0.373433846039004	0.121980694581246	-3.061417606458	0.00220291611747685	0.0441939698937167	DTX1
ENSG00000197223	359.275539988555	0.232032744438502	0.0757873347427739	3.06162956153601	0.00220135700038954	0.0441939698937167	C1D
ENSG00000110931	5238.53079047705	0.235375289143489	0.0768654142478741	3.0621742099048	0.00219735526720446	0.0441939698937167	CAMKK2
ENSG00000183688	5627.12996161414	0.325372406159417	0.106253790219842	3.06221929105977	0.0021970243382322	0.0441939698937167	FAM101B
ENSG00000073737	1232.59122517592	0.433956888545202	0.141736598616969	3.06171371953077	0.00220073822445101	0.0441939698937167	DHRS9
ENSG00000071794	653.175062991568	-0.203193690957094	0.0663970424361776	-3.06028225809017	0.00221128485264125	0.0443072942798598	HLTF
ENSG00000051009	2455.92941798402	0.200076336302337	0.0654058097372045	3.05899945442505	0.00222077554399717	0.0444427931347838	FAM160A2
ENSG00000214748	79.5330283393503	-0.411909170856348	0.134685360297283	-3.0583069306654	0.00222591461171739	0.0444909803986211	RP11-332E4.1
ENSG00000103723	32.892527462272	-1.41049844692187	0.461662532575585	-3.05525865192653	0.00224866503437642	0.0445094888160037	AP3B2
ENSG00000196169	47.2602025462674	-0.721215445302863	0.235959825564863	-3.05651796265041	0.00223924063192682	0.0445094888160037	KIF19
ENSG00000185915	17.0742825289083	-0.56231404735696	0.184160754341381	-3.05338696818429	0.00226273946402267	0.0445094888160037	KLHL34
ENSG00000152767	10.9756943556637	-0.539964677287568	0.177134200955872	-3.04833665307857	0.0023011197714254	0.0445094888160037	FARP1
ENSG00000253293	20.8657772602528	-0.465124888111096	0.15255278095991	-3.04894401258623	0.00229647275343868	0.0445094888160037	HOXA10
ENSG00000173482	233.253945212827	-0.424267144842913	0.139241923230806	-3.0469784889401	0.00231154251309633	0.0445094888160037	PTPRM
ENSG00000143842	180.806243037085	-0.386923885945976	0.126941465163397	-3.0480496301814	0.00230331883133483	0.0445094888160037	SOX13
ENSG00000182107	72.0764715865073	-0.341633662132329	0.112057893165213	-3.04872465903531	0.00229815007477154	0.0445094888160037	TMEM30B
ENSG00000133056	619.616961353761	-0.262723467531542	0.0860715532202991	-3.05238441392018	0.00227031148316202	0.0445094888160037	PIK3C2B
ENSG00000100351	3391.24105936126	-0.236277065573876	0.0773694120428681	-3.05388213940364	0.00225900811312598	0.0445094888160037	GRAP2
ENSG00000143515	3828.62879259666	-0.233121983509613	0.0763076057394023	-3.0550294593929	0.00225038416459098	0.0445094888160037	ATP8B2
ENSG00000182318	126.037153207381	-0.223110368267428	0.0731740775817499	-3.04903560988753	0.00229577267225556	0.0445094888160037	ZSCAN22
ENSG00000104814	1985.46919165337	-0.17827199475575	0.0583818068739277	-3.05355391176429	0.00226148083417833	0.0445094888160037	MAP4K1
ENSG00000143321	4850.05651200235	0.126760303044219	0.0415203382477938	3.05296893988947	0.00226589390097999	0.0445094888160037	HDGF
ENSG00000140319	3621.89433741278	0.133933823726038	0.0438242313296768	3.05615910792576	0.00224192252713233	0.0445094888160037	SRP14
ENSG00000075415	7318.17506864522	0.166558436840764	0.0545895638803056	3.0511040023321	0.00228001583781174	0.0445094888160037	SLC25A3
ENSG00000184009	49384.3908802348	0.174542919440616	0.0572801520631567	3.0471797499449	0.00230999528395821	0.0445094888160037	ACTG1
ENSG00000140264	8990.43844837864	0.188252390660925	0.0617104263290946	3.05057673166924	0.00228402310407745	0.0445094888160037	SERF2
ENSG00000198898	8310.14675983431	0.205879690079794	0.067525701850042	3.0489085553972	0.00229674380639428	0.0445094888160037	CAPZA2
ENSG00000135821	30335.7127178126	0.230807917927603	0.0755891921740512	3.05345131081896	0.00226225429264857	0.0445094888160037	GLUL
ENSG00000027697	14802.9017943828	0.234110957294021	0.0766577155200422	3.05397774647762	0.00225828831794969	0.0445094888160037	IFNGR1
ENSG00000174744	1744.07282321794	0.2346107064722	0.0767893928461278	3.05524887978106	0.00224873830884095	0.0445094888160037	BRMS1
ENSG00000100055	17074.3523724141	0.244618678399254	0.0802157415677604	3.04950965506712	0.00229215265220662	0.0445094888160037	CYTH4
ENSG00000086300	6283.56613734546	0.260804414913878	0.0855938293932539	3.04700019572244	0.00231137559276133	0.0445094888160037	SNX10
ENSG00000120709	6855.30526314237	0.264222175733804	0.0865686705960402	3.05216857223969	0.00227194471038144	0.0445094888160037	FAM53C
ENSG00000064225	1260.99606277976	0.274370631953728	0.0900457672941904	3.04701309343421	0.00231127641745119	0.0445094888160037	ST3GAL6
ENSG00000102032	863.708090913983	0.307017756209479	0.100417903481637	3.05740057862911	0.00223265691724176	0.0445094888160037	RENBP
ENSG00000012779	12348.2774815853	0.328376947122349	0.107535635331466	3.05365701434845	0.00226070383816208	0.0445094888160037	ALOX5
ENSG00000197956	20276.662109877	0.332391112529168	0.108879130064529	3.05284504323438	0.00226682959748163	0.0445094888160037	S100A6
ENSG00000226742	195.410795867235	0.387804394904298	0.127215156814637	3.04841344863775	0.00230053171934368	0.0445094888160037	HSBP1L1
ENSG00000250995	17.1810731856095	0.592966473135993	0.194427534132405	3.04980709538899	0.00228988393586956	0.0445094888160037	RP13-128O4.3
ENSG00000165886	334.574347712236	0.416998441810367	0.136889633235209	3.04623828667774	0.00231724111564819	0.0445665381037886	UBTD1
ENSG00000067829	1402.06550746068	0.177826369438322	0.0584092517742711	3.04448976894194	0.00233075357764273	0.0447735563441039	IDH3G
ENSG00000131459	14.8912986764044	-0.82870462188884	0.272239482885712	-3.04402804877769	0.00233433375224641	0.0447895133381554	GFPT2
ENSG00000110442	1323.47275937279	0.183625913989239	0.0603383214163256	3.04327183254316	0.00234020832728411	0.0448494042958331	COMMD9
ENSG00000253967	18.5051813697401	-1.42928273032718	0.46989010407491	-3.04173830845205	0.00235216290882846	0.0449573289515874	RP11-333A23.4
ENSG00000104312	953.653661073979	0.22814774027213	0.0750094120737498	3.04158816826632	0.00235333632635807	0.0449573289515874	RIPK2
ENSG00000128594	2103.6370534467	0.300264181334165	0.0987227888361354	3.04148803811203	0.0023541191894232	0.0449573289515874	LRRC4
ENSG00000120306	1507.57888227069	0.429509583965321	0.141265688446717	3.04043811832853	0.00236234231064911	0.0450615412651921	CYSTM1
ENSG00000172456	102.980945727442	0.245459284027307	0.0807881270312982	3.03830888333645	0.00237909958745742	0.0452223247137472	FGGY
ENSG00000102879	54742.4319651248	0.260490941545496	0.0857289713462664	3.03854038436261	0.00237727239457684	0.0452223247137472	CORO1A
ENSG00000161960	280.249938871159	0.51794260792538	0.17046684178315	3.03837744928865	0.00237855827567653	0.0452223247137472	EIF4A1
ENSG00000102572	4442.36287671284	0.133161411336476	0.0438435527912154	3.03719481791532	0.00238791068547222	0.0453369056717278	STK24
ENSG00000158321	440.069756075761	-0.396567025862434	0.130611608123378	-3.03623109431307	0.0023955568236762	0.0454057298211932	AUTS2
ENSG00000167291	88.8487195216885	-0.299511072183275	0.0986520280389497	-3.0360356308643	0.00239711035274562	0.0454057298211932	TBC1D16
ENSG00000054116	1722.85316563686	0.135644367220003	0.0447093003924259	3.03391835768877	0.00241399748294174	0.0455210313376689	TRAPPC3
ENSG00000161011	7760.65875105967	0.185166257855287	0.061032999731335	3.03387116265597	0.00241437514277139	0.0455210313376689	SQSTM1
ENSG00000144040	889.937625564375	0.272430599508859	0.0897763407390485	3.03454782480753	0.00240896558531342	0.0455210313376689	SFXN5
ENSG00000067836	812.841765860873	0.353025651718067	0.116341927594189	3.03438028764188	0.00241030392233398	0.0455210313376689	ROGDI
ENSG00000156110	677.274669775359	0.282731303309904	0.0932127682333324	3.03318213447072	0.00241989498359454	0.0455723575523179	ADK
ENSG00000113141	4167.57106018805	0.134946461310718	0.044498890290644	3.03258037288834	0.00242472517331217	0.0456105924633432	IK
ENSG00000234506	875.820998166902	0.463658668115496	0.152951507729098	3.03140959510324	0.00243414800742257	0.0456930945839124	LINC01506
ENSG00000102837	329.514507222775	1.12087140957069	0.369761212544816	3.03133852752291	0.00243472106192977	0.0456930945839124	OLFM4
ENSG00000163607	352.680927132325	-0.148870243270526	0.0491395455724978	-3.02954049607339	0.00244926065723707	0.0459130680165614	GTPBP8
ENSG00000157077	95.6060904488806	-0.275372035309428	0.0909351722291385	-3.02822360764375	0.00245995990010097	0.0460606284743043	ZFYVE9
ENSG00000104635	227.478512839135	-0.246584218390522	0.0814586464224666	-3.02710920473279	0.00246904741217019	0.046071915629155	SLC39A14
ENSG00000111052	2629.23564044354	0.289654664513269	0.0956791742550862	3.02735330617542	0.00246705423881791	0.046071915629155	LIN7A
ENSG00000030582	20454.5843522678	0.385605118605593	0.127382234860018	3.02714989283505	0.0024687150773363	0.046071915629155	GRN
ENSG00000050393	473.039353710445	-0.198572482648173	0.0656149596032226	-3.02632942013456	0.00247542450090089	0.0461380607776608	MCUR1
ENSG00000183784	69.9478264314356	0.309455208567578	0.1022661746927	3.02597813497437	0.00247830223629239	0.046138906776232	C9orf66
ENSG00000173391	88.79815752281	1.10068204440355	0.363842623091163	3.02515971068009	0.00248501866197678	0.0462111347073079	OLR1
ENSG00000230149	39.9218151244808	0.454862307774557	0.150384391529607	3.02466434945814	0.00248909194605785	0.046234102395989	RP3-508I15.19
ENSG00000113312	1680.22407718206	0.147863781106924	0.0489135721796056	3.02296018299346	0.00250315176087283	0.0464423031715471	TTC1
ENSG00000197771	3764.97029064089	0.175238110300628	0.0579834833927784	3.02220736056112	0.00250938584637766	0.046452153906241	MCMBP
ENSG00000138678	2062.21039948802	0.309100605722323	0.102275763103351	3.02222732290907	0.00250922035600985	0.046452153906241	GPAT3
ENSG00000174996	251.920273004241	-0.203882958962511	0.0674765732891407	-3.02153694273806	0.00251494949591035	0.0465023011218837	KLC2
ENSG00000136068	1259.37492724424	-0.260916283730083	0.0863660608261793	-3.02105110774016	0.00251898838222623	0.0465241731819335	FLNB
ENSG00000147439	1614.75771357608	0.193159246705585	0.0639525481018324	3.02035262767038	0.00252480544566807	0.0465729484038905	BIN3
ENSG00000158578	387.125702064999	0.952785620838562	0.315486924923499	3.02004788651573	0.00252734723075747	0.0465729484038905	ALAS2
ENSG00000172197	849.269701379393	0.256669127580923	0.0850126522267413	3.01918738985285	0.00253453710222438	0.0466526659833165	MBOAT1
ENSG00000122694	8922.00655898137	0.224404828619816	0.074371204279401	3.01736177051486	0.00254985303469646	0.0468336966942802	GLIPR2
ENSG00000135636	11433.513913104	0.427414078765428	0.141653086901922	3.01732978866434	0.00255012209747247	0.0468336966942802	DYSF
ENSG00000134480	1079.19568001203	0.134852908261532	0.0447125479025064	3.01599695359729	0.0025613583331186	0.0469870802325472	CCNH
ENSG00000186132	241.470842664399	0.216852157619241	0.0719197908436513	3.01519449758499	0.00256814511659549	0.0470396606398702	C2orf76
ENSG00000124588	1876.43394180531	0.474857419388628	0.157499593066816	3.01497553195061	0.00256999987535202	0.0470396606398702	NQO2
ENSG00000131437	341.231313970017	-0.273596427382935	0.0908341580695325	-3.01204341183523	0.00259495484290881	0.0471478716923433	KIF3A
ENSG00000117020	1061.83640341724	-0.23491497419091	0.0779951360596699	-3.01191825617419	0.00259602494347516	0.0471478716923433	AKT3
ENSG00000188917	823.824578718109	-0.165500490812793	0.0549611855521056	-3.01122490627302	0.00260196050653264	0.0471478716923433	TRMT2B
ENSG00000156232	742.260777407453	-0.120853237882468	0.0401271820900283	-3.0117549149433	0.00259742214356869	0.0471478716923433	WHAMM
ENSG00000079459	2595.94332931372	0.151897049415275	0.0504072746933913	3.01339539459748	0.00258342086052444	0.0471478716923433	FDFT1
ENSG00000155959	1652.66007724292	0.156856316092388	0.0520765904433948	3.01203121703762	0.00259505909260746	0.0471478716923433	VBP1
ENSG00000025039	994.040332545461	0.263634562267123	0.0875377404536018	3.01166743510884	0.00259817071761971	0.0471478716923433	RRAGD
ENSG00000105767	157.671860444126	0.348004605738547	0.115527357981195	3.01231337598141	0.00259264798014222	0.0471478716923433	CADM4
ENSG00000251194	12.1561065961804	0.588725282839081	0.19550005640265	3.01138165211855	0.00260061756737749	0.0471478716923433	RP1-68D18.2
ENSG00000101182	3864.9431379231	0.184664334641345	0.0613402573011967	3.01049168630961	0.00260825088180845	0.0472093409607329	PSMA7
ENSG00000138758	1021.05964945851	-0.232811238950778	0.0773511312651885	-3.00979746699003	0.00261421947680702	0.0472648560235143	sept.11
ENSG00000185825	4034.96915627088	0.194156968014347	0.0645622739268443	3.00728205816213	0.00263595060352275	0.047604917218831	BCAP31
ENSG00000177917	959.106567948889	0.191092627354588	0.0635641496685587	3.00629566117063	0.00264451726632294	0.0477067400535998	ARL6IP6
ENSG00000196172	216.561123493644	-0.314379524223477	0.104593934854891	-3.00571466844262	0.00264957497462205	0.0477451065670279	ZNF681
ENSG00000166483	282.611361271267	-0.276195026275957	0.0919745008876653	-3.00295216185291	0.00267374456618337	0.0479146438593709	WEE1
ENSG00000165609	2179.94721768087	0.190437491159987	0.0634170494903711	3.00293836894606	0.00267386574633033	0.0479146438593709	NUDT5
ENSG00000110200	840.761117714398	0.208757272274821	0.0695106011639673	3.00324366037905	0.00267118472532073	0.0479146438593709	ANAPC15
ENSG00000104324	2825.93771763685	0.245264406689828	0.0816500556985986	3.00384861457036	0.00266587936968305	0.0479146438593709	CPQ
ENSG00000119471	2996.76891640642	0.268561161325435	0.0893984618621784	3.00409152161324	0.00266375182323669	0.0479146438593709	HSDL2
ENSG00000148841	5003.37867723384	0.278748560966545	0.0928349956540241	3.00262373044515	0.00267663142492495	0.0479146438593709	ITPRIP
ENSG00000239306	1308.3413011989	-0.115503449043865	0.0384721774107633	-3.00225921217422	0.00267983881637251	0.0479194010084612	RBM14
ENSG00000003147	128.349246664562	0.25404002468438	0.0846303286738313	3.00176105499318	0.00268422777489764	0.0479452526897835	ICA1
ENSG00000197933	167.056867518008	-0.217808543938652	0.0725801152845244	-3.00093962492084	0.00269147924160486	0.048022121408262	ZNF823
ENSG00000137161	8633.41325165485	0.237497956722564	0.0791548986909534	3.00042019698406	0.00269607391124518	0.0480258655478939	CNPY3
ENSG00000006534	1735.67384132134	0.321086443352069	0.107019914168076	3.00024949419972	0.00269758544974358	0.0480258655478939	ALDH3B1
ENSG00000154174	1535.4740379879	-0.147825412997995	0.0492877375469972	-2.99923308220507	0.00270660161536296	0.0480289110177154	TOMM70
ENSG00000105583	2142.88417854751	0.14450757744446	0.048180882711498	2.99927210362159	0.00270625496505777	0.0480289110177154	WDR83OS
ENSG00000198356	1505.78575497809	0.171734076874236	0.0572527478332149	2.99957789579849	0.00270353983671284	0.0480289110177154	ASNA1
ENSG00000188487	29.549550982068	0.722863927813078	0.241059346074106	2.99869695817915	0.00271136843182098	0.0480611444552381	INSC
ENSG00000163026	400.491395012535	-0.221818032777654	0.0740532701879856	-2.99538470366757	0.00274098902346081	0.0483481795757824	WDCP
ENSG00000138092	217.572677139716	-0.172496223236329	0.0575659063387703	-2.99649973755653	0.00273098473103948	0.0483481795757824	CENPO
ENSG00000139644	28439.6204804961	0.135110381503118	0.0451067803258483	2.99534527907091	0.00274134336034581	0.0483481795757824	TMBIM6
ENSG00000161203	6309.92717881189	0.138770798264498	0.0463194775639011	2.99594912470792	0.00273592075556536	0.0483481795757824	AP2M1
ENSG00000141562	3598.64358077487	0.24616420526802	0.0821854759619682	2.99522759206181	0.00274240134610331	0.0483481795757824	NARF
ENSG00000169019	991.949360650572	0.186542822579731	0.0622957397506139	2.99447158548097	0.00274920661322051	0.0484157575452563	COMMD8
ENSG00000179981	962.567520551339	-0.204337471387957	0.0682894518083999	-2.9922259730722	0.00276951178078646	0.0487206770075717	TSHZ1
ENSG00000160703	922.90971557536	0.282879284362616	0.094590833276441	2.99055706101989	0.00278469096748098	0.0489348606906851	NLRX1
ENSG00000138433	4782.0903304457	0.190661928794533	0.063773922287375	2.98965348148702	0.00279294092692612	0.0490269479521837	CIR1
ENSG00000100027	643.886444088492	-0.26877187270325	0.0899369549590005	-2.9884475500174	0.00280398622900606	0.0490638792686892	YPEL1
ENSG00000115561	2646.63552041971	0.151897958705398	0.0508262741829084	2.98857158324773	0.0028028483529069	0.0490638792686892	CHMP3
ENSG00000279649	13.1494523691454	0.453504705448546	0.151753128407973	2.98843727444844	0.00280408051560158	0.0490638792686892	RP11-96D1.8
ENSG00000111652	1190.28003411192	0.131717370905446	0.0440840329486763	2.98787025812257	0.00280928783589732	0.04910225198151	COPS7A
ENSG00000108950	22.6045192088202	0.956611665646895	0.320221648214212	2.98734227052311	0.00281414466579997	0.049134422943067	FAM20A
ENSG00000214654	68.8011524275305	-0.290661823073088	0.0973391477836202	-2.98607322635713	0.00282584967471307	0.0491806529926024	RP11-27I1.4
ENSG00000093010	1276.11617487168	0.266834150157233	0.0893503288911238	2.98638128665849	0.00282300420654467	0.0491806529926024	COMT
ENSG00000086288	257.905221109089	0.303526767291128	0.101631667155441	2.98653732430561	0.00282156392822915	0.0491806529926024	NME8
ENSG00000010310	95.0551490528871	-0.311673039033965	0.104399467100551	-2.98538917572999	0.00283217742855817	0.0492381753588181	GIPR
ENSG00000204745	22.5816676578141	-0.719951320701888	0.241363513514607	-2.98285068119178	0.00285577281914664	0.0495954575947748	AC083899.3
ENSG00000123689	1215.95744330152	1.39011869521281	0.46619821862316	2.98181897673977	0.00286541373396951	0.0497098932123146	G0S2
ENSG00000185252	247.000007486833	-0.194700305659791	0.0653084244235246	-2.98124334461296	0.00287080571854605	0.0497504522926756	ZNF74
ENSG00000143612	4104.76910406922	0.126281264303985	0.0423748335786611	2.98010053702199	0.00288153793154846	0.0498833718437029	C1orf43
ENSG00000026103	4143.63248830499	0.249031000134486	0.0835814044325807	2.97950246020767	0.00288716911416861	0.0499061629886179	FAS
ENSG00000124469	370.451130623485	1.10240215476304	0.370019262625498	2.97931017682934	0.00288898168804583	0.0499061629886179	CEACAM8
ENSG00000148680	20.3045901612884	0.446338065685747	0.149856487672609	2.9784367204766	0.00289722847402522	0.0499956057646936	HTR7
ENSG00000157152	19.5196877363132	0.678703853789393	0.227928681802151	2.97770271131795	0.00290417527119095	0.0500624499129107	SYN2
ENSG00000198932	797.615223637492	-0.325088304190929	0.109208745441113	-2.97676072440756	0.00291311268233557	0.0501104599738611	GPRASP1
ENSG00000175294	185.75407410329	0.280769741532066	0.0943169068500731	2.9768760544531	0.00291201710357842	0.0501104599738611	CATSPER1
ENSG00000147010	7428.60626596809	0.108605290528137	0.0364914689682796	2.97618302575167	0.00291860619961839	0.0501519989364806	SH3KBP1
ENSG00000116459	2999.61910936036	0.14316366547138	0.048117507625615	2.9752926229115	0.00292709183769992	0.0502201105298702	ATP5F1
ENSG00000176597	1302.89871753949	0.388984344784024	0.130745748860418	2.97512040104108	0.00292873572764743	0.0502201105298702	B3GNT5
ENSG00000102245	728.90408506681	-0.28445378599346	0.0956553030627754	-2.97373775301076	0.0029419639275533	0.050384974800414	CD40LG
[truncated: 15,339 more rows]

## Sheet: miRNA_female
ID	baseMean	log2FoldChange	lfcSE	stat	pvalue	padj
[truncated: 735 more rows]

[truncated: 1 more sheets: miRNA_male]
