# Supplementary material for: Sex-specific and multiomic integration enhance accuracy of peripheral blood biomarkers of major depressive disorder
Source: Research Square preprint supplement (doi:10.21203/rs.3.rs-3978037/v1), 2024-02-23
Supplement: Supplementary file 3 [file 5c187e7de5f0b8579736a5a0.xlsx]

## Sheet: female
	ONTOLOGY	Description	N	DE	P.DE	FDR
hsa01100	KEGG	Metabolic pathways	1455	1142	0.000486063039937984	0.0156865799252713
hsa01200	KEGG	Carbon metabolism	105	91	0.00268400846441481	0.0328559656850779
hsa01522	KEGG	Endocrine resistance	95	86	0.00135107623239305	0.0252437927631333
hsa04010	KEGG	MAPK signaling pathway	288	246	0.000906148616606834	0.0189225152291427
hsa04012	KEGG	ErbB signaling pathway	80	76	6.79752244998192e-05	0.00603280117435895
hsa04015	KEGG	Rap1 signaling pathway	207	182	0.00027542048373417	0.0120567030064719
hsa04020	KEGG	Calcium signaling pathway	241	207	0.000811115557210726	0.0184418134229521
hsa04022	KEGG	cGMP-PKG signaling pathway	161	143	0.00016558482702216	0.0117565227185734
hsa04064	KEGG	NF-kappa B signaling pathway	93	81	0.00426344727568701	0.0472976182146527
hsa04070	KEGG	Phosphatidylinositol signaling system	92	84	0.000754933404525213	0.0184418134229521
hsa04072	KEGG	Phospholipase D signaling pathway	144	127	0.00192520947986704	0.031065880243309
hsa04140	KEGG	Autophagy - animal	157	136	0.00246143153276079	0.032758388225118
hsa04144	KEGG	Endocytosis	240	204	0.00203788676636445	0.031454339219973
hsa04150	KEGG	mTOR signaling pathway	151	132	0.00134426329256526	0.0252437927631333
hsa04310	KEGG	Wnt signaling pathway	168	149	0.000264891473491291	0.0120567030064719
hsa04360	KEGG	Axon guidance	175	155	0.000740377877431393	0.0184418134229521
hsa04390	KEGG	Hippo signaling pathway	154	137	0.000425992816511873	0.0151227449861715
hsa04510	KEGG	Focal adhesion	195	173	0.000219909220835837	0.0120567030064719
hsa04668	KEGG	TNF signaling pathway	110	96	0.00233187145130563	0.032758388225118
hsa04810	KEGG	Regulation of actin cytoskeleton	218	187	0.00162376423522753	0.0274493477859891
hsa04911	KEGG	Insulin secretion	83	75	0.00249148304810757	0.032758388225118
hsa04919	KEGG	Thyroid hormone signaling pathway	117	109	1.5469615571633e-05	0.00274585676396486
hsa04928	KEGG	Parathyroid hormone synthesis, secretion and action	105	94	0.0021827414459017	0.0322863838872959
hsa04929	KEGG	GnRH secretion	62	57	0.00366789871594084	0.0434034681386333
hsa04934	KEGG	Cushing syndrome	153	135	0.000614766050995805	0.0181868290086259
hsa05017	KEGG	Spinocerebellar ataxia	139	124	0.000305662893121824	0.0120567030064719
hsa05022	KEGG	Pathways of neurodegeneration - multiple diseases	449	368	0.000831180323287983	0.0184418134229521
hsa05031	KEGG	Amphetamine addiction	66	60	0.00407055218035465	0.0466143878718033
hsa05200	KEGG	Pathways in cancer	506	425	5.41178640753046e-05	0.00603280117435895
hsa05205	KEGG	Proteoglycans in cancer	199	182	1.70368959358183e-07	6.04809805721549e-05
hsa05211	KEGG	Renal cell carcinoma	65	60	0.00260804808307185	0.0328559656850779
hsa05231	KEGG	Choline metabolism in cancer	95	86	0.0014417140454669	0.0255904243070374
GO:0000003	BP	reproduction	1394	1096	0.00026605796618506	0.00947166359618812
GO:0000049	MF	tRNA binding	70	63	0.00169563464417996	0.0452381027318457
GO:0000122	BP	negative regulation of transcription by RNA polymerase II	873	724	7.61512421873043e-07	4.76656566482292e-05
GO:0000139	CC	Golgi membrane	633	529	3.6927014561572e-06	0.000206212034257563
GO:0000151	CC	ubiquitin ligase complex	294	247	0.000726041900434097	0.0222639820450747
GO:0000165	BP	MAPK cascade	748	604	0.000491836771017938	0.0158053723425567
GO:0000166	MF	nucleotide binding	2029	1725	1.59283618525575e-22	1.45164718579468e-19
GO:0000209	BP	protein polyubiquitination	237	208	3.89884938116808e-06	0.000215610156069256
GO:0000226	BP	microtubule cytoskeleton organization	616	509	9.17023714571328e-05	0.00375781804186927
GO:0000278	BP	mitotic cell cycle	913	734	0.000519058391959924	0.0165865727944108
GO:0000775	CC	chromosome, centromeric region	236	197	0.00119727737761061	0.0337894221632683
GO:0000776	CC	kinetochore	156	134	0.00119829060340242	0.0337894221632683
GO:0000785	CC	chromatin	1203	960	0.000723050769615835	0.0222321035559071
GO:0000902	BP	cell morphogenesis	971	859	3.16722599813875e-17	1.11018580217836e-14
GO:0000904	BP	cell morphogenesis involved in differentiation	688	609	2.03827037985595e-12	3.77560588086487e-10
GO:0000910	BP	cytokinesis	176	152	0.00062801215881909	0.0197360400365988
GO:0001501	BP	skeletal system development	520	446	3.26752013802081e-07	2.15165256718688e-05
GO:0001503	BP	ossification	409	345	4.97493461228912e-05	0.00219243540051055
GO:0001505	BP	regulation of neurotransmitter levels	209	185	6.12688623204684e-05	0.00262890726762628
GO:0001650	CC	fibrillar center	139	122	0.00105156076561356	0.030443151821778
GO:0001654	BP	eye development	379	322	0.000114238392317802	0.00453450789297699
GO:0001659	BP	temperature homeostasis	176	158	1.25197641224968e-05	0.000632484048263783
GO:0001701	BP	in utero embryonic development	380	322	7.51345636061173e-05	0.00313528552601058
GO:0001726	CC	ruffle	173	154	0.00024451438127091	0.00881489820075381
GO:0001763	BP	morphogenesis of a branching structure	196	176	1.23967360509573e-05	0.000627660520411138
GO:0001764	BP	neuron migration	167	148	0.000443058691000938	0.0145038063444905
GO:0001772	CC	immunological synapse	45	43	0.000969449869775745	0.0284272147142478
GO:0001822	BP	kidney development	300	255	0.00126656466605307	0.0354078642347892
GO:0001885	BP	endothelial cell development	61	57	0.00133882621802887	0.0371544659580632
GO:0001932	BP	regulation of protein phosphorylation	1059	862	9.75819436679897e-07	5.99128273833329e-05
GO:0001934	BP	positive regulation of protein phosphorylation	701	576	1.59068469079136e-05	0.000789589542374515
GO:0002009	BP	morphogenesis of an epithelium	504	435	1.55061277822722e-07	1.08705112428089e-05
GO:0002062	BP	chondrocyte differentiation	111	102	0.000125158510664113	0.0048996761288164
GO:0002064	BP	epithelial cell development	202	178	0.000140843520107629	0.00544818125998679
GO:0002376	BP	immune system process	2434	1869	0.000433677320476299	0.0142581588307821
GO:0002520	BP	immune system development	981	782	0.000849241109174548	0.0253925320622479
GO:0003002	BP	regionalization	350	301	2.48533976546462e-05	0.00116754600446074
GO:0003006	BP	developmental process involved in reproduction	883	703	0.000951938603946852	0.0280219239694122
GO:0003007	BP	heart morphogenesis	255	224	5.48175063488185e-06	0.000295962574561962
GO:0003013	BP	circulatory system process	583	488	1.90128756249606e-06	0.000109391252080582
GO:0003018	BP	vascular process in circulatory system	262	228	8.65979822227542e-06	0.000450467677388866
GO:0003179	BP	heart valve morphogenesis	54	51	0.0016232610115793	0.0436136543488475
GO:0003674	MF	molecular_function	16813	12854	1.12733622611397e-19	5.46494225016612e-17
GO:0003677	MF	DNA binding	2341	1815	0.00118360757519627	0.0335832067164033
GO:0003682	MF	chromatin binding	550	453	0.000460340756913581	0.0149771699740283
GO:0003712	MF	transcription coregulator activity	463	400	2.40638704389137e-07	1.61731924507436e-05
GO:0003713	MF	transcription coactivator activity	258	223	0.00015229107106756	0.00584141374276648
GO:0003714	MF	transcription corepressor activity	174	156	2.7420317514434e-05	0.00128548253960672
GO:0003774	MF	cytoskeletal motor activity	109	99	0.000400905848976968	0.0133152170015907
GO:0003779	MF	actin binding	414	359	1.75182130661118e-06	0.000101561060177682
GO:0003824	MF	catalytic activity	5121	4113	2.37845720183492e-21	1.69346152770646e-18
GO:0004386	MF	helicase activity	147	129	0.000800906602299797	0.024169345730859
GO:0004672	MF	protein kinase activity	539	475	6.25262288703071e-10	7.05246335931226e-08
GO:0004674	MF	protein serine/threonine kinase activity	407	360	1.78228907801944e-08	1.54401803625836e-06
GO:0004713	MF	protein tyrosine kinase activity	136	122	0.00101643739447062	0.029538915300534
GO:0004842	MF	ubiquitin-protein transferase activity	406	343	1.129242517204e-05	0.000574300480178036
GO:0005085	MF	guanyl-nucleotide exchange factor activity	216	187	0.00111060023753173	0.0318055442997575
GO:0005096	MF	GTPase activator activity	242	213	2.07912875473832e-05	0.000997281464167536
GO:0005178	MF	integrin binding	153	134	0.00183277493540211	0.0483869572748571
GO:0005215	MF	transporter activity	1155	961	2.42751631077961e-10	2.86572702719185e-08
GO:0005216	MF	ion channel activity	424	373	1.98745023869984e-09	1.9773828051763e-07
GO:0005244	MF	voltage-gated ion channel activity	190	168	9.09023588276203e-05	0.00373174656491622
GO:0005261	MF	cation channel activity	333	296	9.15406084643371e-09	8.3761494909697e-07
GO:0005262	MF	calcium channel activity	116	111	1.00894505462487e-07	7.43941881054141e-06
GO:0005488	MF	binding	15274	11838	2.92435082394239e-31	1.11047348621172e-27
GO:0005496	MF	steroid binding	96	86	0.000418469862689188	0.0138179961616094
GO:0005515	MF	protein binding	13047	10326	4.07099766879307e-46	4.63768054428906e-42
GO:0005516	MF	calmodulin binding	193	168	0.000678524666705284	0.0210907312499498
GO:0005524	MF	ATP binding	1402	1222	5.22720756061661e-22	4.11570625064837e-19
GO:0005543	MF	phospholipid binding	441	375	4.42297442260282e-05	0.00197594214205064
GO:0005575	CC	cellular_component	17754	13254	2.13210782712532e-05	0.00102054505742066
GO:0005622	CC	intracellular anatomical structure	14178	11029	2.59656024069633e-33	1.47900071310063e-29
GO:0005634	CC	nucleus	7421	5716	1.45810948862113e-11	2.24470044518539e-09
GO:0005635	CC	nuclear envelope	460	377	0.00150036227804381	0.0408902561518543
GO:0005654	CC	nucleoplasm	3907	3210	4.12197536405587e-24	5.52441686439112e-21
GO:0005667	CC	transcription regulator complex	480	413	1.66131536026819e-07	1.15400637708386e-05
GO:0005694	CC	chromosome	1748	1405	3.88688012883653e-07	2.5230392266499e-05
GO:0005737	CC	cytoplasm	11280	9022	3.09270618364672e-49	7.04642176882068e-45
GO:0005739	CC	mitochondrion	1568	1230	9.31656757987385e-05	0.0038109277511642
GO:0005765	CC	lysosomal membrane	396	328	0.000784195855231775	0.0238228244874677
GO:0005768	CC	endosome	963	822	1.21279465834756e-12	2.34172148269414e-10
GO:0005769	CC	early endosome	392	346	6.76739139686521e-09	6.37141510686681e-07
GO:0005770	CC	late endosome	269	231	2.24976175491559e-05	0.00107011632200411
GO:0005774	CC	vacuolar membrane	439	361	0.0011940382717232	0.0337894221632683
GO:0005783	CC	endoplasmic reticulum	1896	1536	1.10996834009558e-10	1.42878636501343e-08
GO:0005789	CC	endoplasmic reticulum membrane	1098	893	1.02429048199179e-07	7.52820462635511e-06
GO:0005794	CC	Golgi apparatus	1547	1261	7.91272770073084e-08	5.93038118202143e-06
GO:0005813	CC	centrosome	599	510	3.09312601465968e-08	2.5533979390582e-06
GO:0005814	CC	centriole	151	133	0.000185608123726681	0.00693261555899788
GO:0005815	CC	microtubule organizing center	801	686	2.74884234729832e-11	3.89003876030093e-09
GO:0005819	CC	spindle	402	338	3.60089021330971e-05	0.00164414193627352
GO:0005829	CC	cytosol	5130	4177	8.60614678309508e-27	2.17869387006709e-23
GO:0005856	CC	cytoskeleton	2255	1854	8.61765991825586e-15	2.13418221279936e-12
GO:0005874	CC	microtubule	445	376	7.42192785632756e-06	0.000391437972867054
GO:0005886	CC	plasma membrane	5180	4057	4.43135638227946e-13	8.93486936405799e-11
GO:0005887	CC	integral component of plasma membrane	1579	1246	5.60830712404092e-05	0.00243389846693616
GO:0005901	CC	caveola	81	75	0.000381796250735101	0.0127549058310096
GO:0005911	CC	cell-cell junction	478	413	2.57712177413471e-07	1.71187004378674e-05
GO:0005912	CC	adherens junction	170	162	1.90798741848098e-09	1.92352147533941e-07
GO:0005925	CC	focal adhesion	408	358	7.26212004280028e-08	5.51533810183872e-06
GO:0005929	CC	cilium	693	571	1.25460160841115e-06	7.40539975286002e-05
GO:0005938	CC	cell cortex	302	263	3.71820970371684e-05	0.00169431379778969
GO:0005975	BP	carbohydrate metabolic process	562	456	0.00139339646900158	0.0384348004234044
GO:0005996	BP	monosaccharide metabolic process	237	202	0.000353461452906334	0.0120018863532309
GO:0006091	BP	generation of precursor metabolites and energy	464	372	0.00149494250824312	0.0407913414464805
GO:0006139	BP	nucleobase-containing compound metabolic process	5584	4263	5.60163202175407e-07	3.54521066621236e-05
GO:0006163	BP	purine nucleotide metabolic process	438	358	0.000363896185248461	0.0122561071492218
GO:0006164	BP	purine nucleotide biosynthetic process	218	182	0.00182190709694323	0.048155836771177
GO:0006259	BP	DNA metabolic process	997	805	4.79951739609984e-05	0.00211922876652595
GO:0006281	BP	DNA repair	551	457	3.01835273799069e-05	0.00140922436029467
GO:0006351	BP	DNA-templated transcription	3265	2612	2.04979196089988e-11	3.03262727513915e-09
GO:0006355	BP	regulation of DNA-templated transcription	3156	2521	1.5378142103005e-10	1.88600059665715e-08
GO:0006357	BP	regulation of transcription by RNA polymerase II	2386	1901	1.57138688261475e-07	1.09487702548912e-05
GO:0006366	BP	transcription by RNA polymerase II	2467	1968	5.07989216201843e-08	3.97732862609718e-06
GO:0006468	BP	protein phosphorylation	1493	1235	1.26644736083127e-10	1.57676156662184e-08
GO:0006486	BP	protein glycosylation	221	186	0.00101632729943515	0.029538915300534
GO:0006508	BP	proteolysis	1682	1313	0.000392536226197987	0.0130562706243722
GO:0006511	BP	ubiquitin-dependent protein catabolic process	631	542	4.42274658938452e-10	5.06371147198678e-08
GO:0006605	BP	protein targeting	305	253	0.000822038047794614	0.0246763041909782
GO:0006629	BP	lipid metabolic process	1351	1069	3.21970711191907e-05	0.0014879879683157
GO:0006725	BP	cellular aromatic compound metabolic process	5799	4438	1.85575260411473e-08	1.58952884707331e-06
GO:0006753	BP	nucleoside phosphate metabolic process	562	461	4.13466585876272e-05	0.0018654302361594
GO:0006793	BP	phosphorus metabolic process	2671	2198	4.14506605470567e-17	1.4309270453093e-14
GO:0006796	BP	phosphate-containing compound metabolic process	2646	2180	1.8442781530104e-17	6.66984657749032e-15
GO:0006807	BP	nitrogen compound metabolic process	9448	7255	1.30110822193828e-13	2.74485645635572e-11
GO:0006810	BP	transport	4270	3480	3.25684693537213e-23	3.71020002877593e-20
GO:0006811	BP	ion transport	1489	1224	1.18985633819737e-10	1.50609371163827e-08
GO:0006812	BP	cation transport	1148	951	1.88372148565718e-09	1.90749823685392e-07
GO:0006813	BP	potassium ion transport	238	204	0.000298238786064716	0.0104218903400284
GO:0006814	BP	sodium ion transport	242	213	1.01953399068976e-05	0.000524358068710507
GO:0006816	BP	calcium ion transport	420	349	0.000142469172092689	0.00550172477450819
GO:0006821	BP	chloride transport	109	97	0.00111118386861864	0.0318055442997575
GO:0006836	BP	neurotransmitter transport	202	178	0.000204827272280888	0.00757594897994766
GO:0006886	BP	intracellular protein transport	825	683	2.45314997799767e-07	1.6438990911382e-05
GO:0006887	BP	exocytosis	347	291	0.000644685469039482	0.0201488528485536
GO:0006892	BP	post-Golgi vesicle-mediated transport	101	93	0.000119900284910226	0.00472870232455018
GO:0006897	BP	endocytosis	564	483	3.73871213996628e-08	3.04224347846399e-06
GO:0006898	BP	receptor-mediated endocytosis	246	215	6.82789812863204e-06	0.000360943923347453
GO:0006914	BP	autophagy	525	440	7.56926538895261e-06	0.000395546198674074
GO:0006915	BP	apoptotic process	1822	1440	7.77736240253641e-05	0.00323356614925893
GO:0006950	BP	response to stress	3729	2901	3.29979535936226e-08	2.70440782257948e-06
GO:0006974	BP	cellular response to DNA damage stimulus	827	687	1.70525883615005e-07	1.18093061771558e-05
GO:0006984	BP	ER-nucleus signaling pathway	46	44	0.000810880027835153	0.0244056678390966
GO:0006996	BP	organelle organization	3373	2756	1.02695264270693e-18	4.499632502199e-16
GO:0007010	BP	cytoskeleton organization	1431	1194	4.63682015922252e-11	6.28841133974559e-09
GO:0007015	BP	actin filament organization	428	364	6.50225033406428e-05	0.00277949852929307
GO:0007017	BP	microtubule-based process	887	729	2.99387970020789e-06	0.000169682972859544
GO:0007018	BP	microtubule-based movement	400	329	0.00125689621848322	0.0351807413291422
GO:0007034	BP	vacuolar transport	156	136	0.000706420936324212	0.0218683350722973
GO:0007049	BP	cell cycle	1726	1381	3.53197026865841e-06	0.000197720910567845
GO:0007098	BP	centrosome cycle	132	116	0.000477833444995738	0.0154206192787293
GO:0007099	BP	centriole replication	41	39	0.00146146449099051	0.040099547467626
GO:0007154	BP	cell communication	6111	4756	5.25067133488027e-12	8.99483426270015e-10
GO:0007155	BP	cell adhesion	1470	1200	1.40760696335159e-08	1.2478956051752e-06
GO:0007156	BP	homophilic cell adhesion via plasma membrane adhesion molecules	164	139	0.00125193589493961	0.035085002989304
GO:0007163	BP	establishment or maintenance of cell polarity	228	205	1.04157591873562e-06	6.29476544627912e-05
GO:0007165	BP	signal transduction	5573	4315	4.70267939919507e-10	5.35729237156302e-08
GO:0007166	BP	cell surface receptor signaling pathway	2635	2124	1.71536434826712e-11	2.58826896098795e-09
GO:0007167	BP	enzyme-linked receptor protein signaling pathway	966	803	5.9207190799508e-08	4.57280215313895e-06
GO:0007169	BP	transmembrane receptor protein tyrosine kinase signaling pathway	619	520	1.39140717345804e-06	8.19168502327339e-05
GO:0007254	BP	JNK cascade	162	145	4.37232675886628e-05	0.00195715310165048
GO:0007264	BP	small GTPase mediated signal transduction	474	413	7.19858504548091e-08	5.48536995572699e-06
GO:0007265	BP	Ras protein signal transduction	329	286	5.7362046887829e-06	0.000307514559127599
GO:0007267	BP	cell-cell signaling	1588	1301	7.69266928184836e-09	7.15386844561767e-07
GO:0007268	BP	chemical synaptic transmission	696	583	1.5643722618506e-06	9.13914297794974e-05
GO:0007272	BP	ensheathment of neurons	141	124	0.00131153711460206	0.0364860337229468
GO:0007275	BP	multicellular organism development	4685	3817	5.01906122565045e-22	4.11570625064837e-19
GO:0007389	BP	pattern specification process	455	394	1.56381685541147e-07	1.09294488446917e-05
GO:0007399	BP	nervous system development	2376	2008	1.2664094369177e-20	7.39842887454687e-18
GO:0007405	BP	neuroblast proliferation	66	62	0.000552911239557564	0.0175209035912094
GO:0007409	BP	axonogenesis	417	366	4.44502679378637e-07	2.85085643538289e-05
GO:0007411	BP	axon guidance	229	201	0.000298149908728236	0.0104218903400284
GO:0007417	BP	central nervous system development	1002	855	1.01930744756511e-10	1.33470694743238e-08
GO:0007420	BP	brain development	721	623	6.1838449639631e-10	7.00958824173808e-08
GO:0007423	BP	sensory organ development	560	468	0.00010205899300756	0.00414370998719936
GO:0007507	BP	heart development	589	501	2.40470354908383e-07	1.61731924507436e-05
GO:0007517	BP	muscle organ development	337	284	0.000436993819434138	0.0143464944985409
GO:0007610	BP	behavior	609	517	1.96399102835282e-07	1.35189038036226e-05
GO:0007611	BP	learning or memory	263	232	4.09259360930667e-06	0.000225231045397206
GO:0007612	BP	learning	145	130	0.000216132491822756	0.00792973058565166
GO:0007613	BP	memory	117	106	0.000225829136620687	0.00824565873199636
GO:0007626	BP	locomotory behavior	193	167	0.00109660810898184	0.031546867620003
GO:0008015	BP	blood circulation	501	411	0.000405649861547378	0.0134336140196155
GO:0008017	MF	microtubule binding	257	219	0.000865252316968568	0.0257938535388141
GO:0008022	MF	protein C-terminus binding	177	161	2.47389182320659e-06	0.000141266043358243
GO:0008047	MF	enzyme activator activity	516	437	1.21563518330417e-06	7.23160104866898e-05
GO:0008092	MF	cytoskeletal protein binding	947	812	5.15809779304088e-11	6.95397042110316e-09
GO:0008104	BP	protein localization	2343	1943	8.90034716609851e-17	2.9821398504763e-14
GO:0008134	MF	transcription factor binding	567	501	4.18537288269702e-12	7.4499637312007e-10
GO:0008150	BP	biological_process	16958	12706	2.09097720601587e-08	1.7644749874765e-06
GO:0008152	BP	metabolic process	11278	8468	1.05260052177898e-06	6.33095379369027e-05
GO:0008173	MF	RNA methyltransferase activity	60	54	0.00155060585047428	0.0421084668619858
GO:0008219	BP	cell death	2038	1608	4.02716072061474e-05	0.00182053233846203
GO:0008283	BP	cell population proliferation	1949	1527	0.000178369860413717	0.00669518764360152
GO:0008289	MF	lipid binding	786	646	1.68946365396902e-05	0.000829584911466166
GO:0008324	MF	cation transmembrane transporter activity	621	537	2.60676901942937e-10	3.04577565839378e-08
GO:0008328	CC	ionotropic glutamate receptor complex	36	36	0.000257428898217534	0.00922210694495014
GO:0008360	BP	regulation of cell shape	148	130	0.00170749404020263	0.0455012213005574
GO:0008361	BP	regulation of cell size	172	156	1.92634998414366e-05	0.000928399879918542
GO:0008366	BP	axon ensheathment	141	124	0.00131153711460206	0.0364860337229468
GO:0008406	BP	gonad development	213	180	0.00157770424579791	0.0427933494479281
GO:0008509	MF	anion transmembrane transporter activity	286	241	0.000696722438944882	0.0215974476856057
GO:0008610	BP	lipid biosynthetic process	695	567	5.37903372629741e-05	0.0023388531377855
GO:0009056	BP	catabolic process	2431	1990	1.51920233152521e-15	4.27327233598401e-13
GO:0009057	BP	macromolecule catabolic process	1296	1069	1.58026762290153e-09	1.65920818065385e-07
GO:0009058	BP	biosynthetic process	5517	4388	6.92549810267219e-19	3.09393232884869e-16
GO:0009059	BP	macromolecule biosynthetic process	4438	3519	1.4404990640617e-13	2.98366642505289e-11
GO:0009101	BP	glycoprotein biosynthetic process	311	256	0.00115243556273356	0.0328624428802522
GO:0009117	BP	nucleotide metabolic process	554	454	5.8492751510513e-05	0.00251927949038852
GO:0009150	BP	purine ribonucleotide metabolic process	411	338	0.000218535918020962	0.00800501986525658
GO:0009165	BP	nucleotide biosynthetic process	279	232	0.000909397582713935	0.0269087201617588
GO:0009259	BP	ribonucleotide metabolic process	429	350	0.000653702933575747	0.0203469503259424
GO:0009314	BP	response to radiation	433	359	0.000219669769357302	0.00803363727935277
GO:0009605	BP	response to external stimulus	2613	2006	0.000797665275880512	0.0241034557634769
GO:0009612	BP	response to mechanical stimulus	206	176	0.00123292083572713	0.0346876779617184
GO:0009628	BP	response to abiotic stimulus	1094	901	7.78782271006126e-08	5.85603143980316e-06
GO:0009653	BP	anatomical structure morphogenesis	2673	2221	9.9674460974541e-18	3.72292281777695e-15
GO:0009719	BP	response to endogenous stimulus	1567	1282	1.57230678372185e-09	1.65849248890364e-07
GO:0009725	BP	response to hormone	831	684	4.96381686518384e-06	0.000270563644632413
GO:0009790	BP	embryo development	1096	934	5.15242176187998e-12	8.89339222899042e-10
GO:0009792	BP	embryo development ending in birth or egg hatching	657	562	2.4295370328915e-08	2.03509454990441e-06
GO:0009799	BP	specification of symmetry	136	120	0.000460805659752187	0.0149771699740283
GO:0009855	BP	determination of bilateral symmetry	135	119	0.000525355750342427	0.0167380995607487
GO:0009887	BP	animal organ morphogenesis	1025	875	2.16325152206925e-11	3.15945658197602e-09
GO:0009888	BP	tissue development	1906	1559	1.20994029082547e-10	1.52305412078273e-08
GO:0009889	BP	regulation of biosynthetic process	3903	3092	2.01995419150219e-11	3.02780501968328e-09
GO:0009890	BP	negative regulation of biosynthetic process	1558	1242	1.58414520490688e-05	0.000789589542374515
GO:0009891	BP	positive regulation of biosynthetic process	1966	1615	2.12866271867936e-11	3.12899686338004e-09
GO:0009893	BP	positive regulation of metabolic process	3670	2958	1.85494671195024e-14	4.3570212252654e-12
GO:0009894	BP	regulation of catabolic process	942	798	2.558945480451e-11	3.66685621550915e-09
GO:0009896	BP	positive regulation of catabolic process	503	430	8.04936789540007e-08	5.9933594159737e-06
GO:0009966	BP	regulation of signal transduction	2913	2372	5.72390599888509e-15	1.44903860309553e-12
GO:0009967	BP	positive regulation of signal transduction	1497	1212	1.44592807477385e-07	1.01679090295208e-05
GO:0009968	BP	negative regulation of signal transduction	1255	1008	1.74211788421922e-05	0.000849944622570677
GO:0009987	BP	cellular process	15712	11981	6.80224254381132e-20	3.44405098040438e-17
GO:0010008	CC	endosome membrane	503	427	8.47508135864569e-07	5.23296080421093e-05
GO:0010033	BP	response to organic substance	2958	2320	1.46397135655271e-06	8.59668128548893e-05
GO:0010232	BP	vascular transport	84	78	0.000295255792494151	0.0103493968864411
GO:0010243	BP	response to organonitrogen compound	1003	831	2.21368079985972e-08	1.86112558464959e-06
GO:0010256	BP	endomembrane system organization	558	465	2.18959776682605e-05	0.00104367773053064
GO:0010498	BP	proteasomal protein catabolic process	498	419	4.44763498374958e-06	0.000243420156443938
GO:0010506	BP	regulation of autophagy	326	276	0.000137957060684866	0.00535470812716181
GO:0010508	BP	positive regulation of autophagy	137	119	0.00158309227634877	0.0428374993163067
GO:0010556	BP	regulation of macromolecule biosynthetic process	3682	2916	1.81128572260988e-10	2.17201757389176e-08
GO:0010557	BP	positive regulation of macromolecule biosynthetic process	1822	1505	1.65552722320279e-11	2.52582802892621e-09
GO:0010558	BP	negative regulation of macromolecule biosynthetic process	1467	1172	1.9273751018323e-05	0.000928399879918542
GO:0010562	BP	positive regulation of phosphorus metabolic process	854	707	2.12848866368971e-07	1.45097171761301e-05
GO:0010604	BP	positive regulation of macromolecule metabolic process	3365	2703	6.89494663544575e-12	1.13836568218838e-09
GO:0010638	BP	positive regulation of organelle organization	496	409	0.000514323413972936	0.016458349247134
GO:0010646	BP	regulation of cell communication	3287	2675	7.8804257769456e-16	2.24434526127411e-13
GO:0010647	BP	positive regulation of cell communication	1684	1355	3.83377440143793e-07	2.49567759892462e-05
GO:0010648	BP	negative regulation of cell communication	1357	1089	1.60069076104197e-05	0.000792829093469135
GO:0010941	BP	regulation of cell death	1585	1253	7.05860075428807e-05	0.00297820665899443
GO:0010975	BP	regulation of neuron projection development	424	379	1.54613782958535e-09	1.63847461903594e-07
GO:0010976	BP	positive regulation of neuron projection development	149	131	0.00115196110177999	0.0328624428802522
GO:0010977	BP	negative regulation of neuron projection development	135	122	0.000210816495520921	0.00775968179959395
GO:0012501	BP	programmed cell death	1879	1480	0.00014425667893548	0.00556132685764126
GO:0012505	CC	endomembrane system	4447	3598	5.92164649454008e-21	4.088448294897e-18
GO:0012506	CC	vesicle membrane	1145	954	1.63569618304805e-09	1.70547627909545e-07
GO:0014033	BP	neural crest cell differentiation	94	86	0.000502077003581112	0.0161068340874782
GO:0014069	CC	postsynaptic density	307	274	2.56134276035293e-07	1.70636355122459e-05
GO:0014070	BP	response to organic cyclic compound	887	717	0.000153916767533692	0.00588395911323431
GO:0015031	BP	protein transport	1486	1208	5.96515330224067e-08	4.59155583913012e-06
GO:0015075	MF	ion transmembrane transporter activity	806	691	1.38090108453096e-11	2.15157437882778e-09
GO:0015085	MF	calcium ion transmembrane transporter activity	131	125	3.89579832127855e-08	3.14758400539044e-06
GO:0015103	MF	inorganic anion transmembrane transporter activity	149	133	9.41253054273396e-05	0.00384328128827331
GO:0015108	MF	chloride transmembrane transporter activity	100	89	0.00187818990289237	0.0494713049104044
GO:0015267	MF	channel activity	466	397	6.04332469559332e-07	3.80362181945851e-05
GO:0015276	MF	ligand-gated ion channel activity	138	124	0.000120168479894424	0.00472870232455018
GO:0015291	MF	secondary active transmembrane transporter activity	234	202	0.000210076628409207	0.0077575136169779
GO:0015318	MF	inorganic molecular entity transmembrane transporter activity	700	605	1.6628959108977e-11	2.52582802892621e-09
GO:0015485	MF	cholesterol binding	50	47	0.00105813828965237	0.0305692762765444
GO:0015629	CC	actin cytoskeleton	486	413	1.67344760992036e-05	0.000823495255819123
GO:0015630	CC	microtubule cytoskeleton	1299	1106	3.07392428805746e-16	9.33817213054683e-14
GO:0015631	MF	tubulin binding	352	296	0.00062780153273793	0.0197360400365988
GO:0015698	BP	inorganic anion transport	174	154	7.43641434054538e-05	0.00310883053825662
GO:0016020	CC	membrane	8664	6809	5.37026581237009e-26	1.01963446890867e-22
GO:0016021	CC	integral component of membrane	4925	3718	9.06845667971492e-05	0.00373174656491622
GO:0016032	BP	viral process	401	329	0.000523145753866233	0.0166937715071264
GO:0016043	BP	cellular component organization	5932	4854	4.23751547507338e-33	1.93095105168144e-29
GO:0016050	BP	vesicle organization	338	282	0.00086605942578971	0.0257938535388141
GO:0016055	BP	Wnt signaling pathway	435	375	8.98601234793291e-07	5.53344068473793e-05
GO:0016070	BP	RNA metabolic process	4548	3432	0.000939888380318533	0.0277221967812838
GO:0016071	BP	mRNA metabolic process	677	543	0.00163144570525623	0.0437472190863095
GO:0016192	BP	vesicle-mediated transport	1470	1240	9.27009830935016e-15	2.27107440731435e-12
GO:0016197	BP	endosomal transport	230	206	4.46697571730903e-07	2.85085643538289e-05
GO:0016236	BP	macroautophagy	303	259	3.49556280409445e-05	0.00160570368807435
GO:0016301	MF	kinase activity	690	605	7.54228872489963e-12	1.23628421804398e-09
GO:0016310	BP	phosphorylation	1750	1463	4.94261643578251e-15	1.26530980756032e-12
GO:0016358	BP	dendrite development	223	207	4.35785869138656e-09	4.17182573212401e-07
GO:0016462	MF	pyrophosphatase activity	686	554	0.000324649596059511	0.0111434446479901
GO:0016477	BP	cell migration	1509	1199	0.000102926708294265	0.00416533236550008
GO:0016482	BP	cytosolic transport	160	141	0.000325525196971806	0.0111530317109859
GO:0016567	BP	protein ubiquitination	761	636	7.66750472943317e-08	5.78464992567568e-06
GO:0016570	BP	histone modification	442	370	0.000232210195626682	0.00843808149467036
GO:0016604	CC	nuclear body	800	657	1.8329096243295e-05	0.00088853218895156
GO:0016740	MF	transferase activity	2089	1728	4.53122613724712e-15	1.17317563989816e-12
GO:0016772	MF	transferase activity, transferring phosphorus-containing groups	827	710	1.5396598972008e-10	1.88600059665715e-08
GO:0016773	MF	phosphotransferase activity, alcohol group as acceptor	641	565	1.00245006472493e-11	1.59719036885964e-09
GO:0016787	MF	hydrolase activity	2185	1730	2.50369312614907e-07	1.67284880311379e-05
GO:0016817	MF	hydrolase activity, acting on acid anhydrides	687	555	0.000306355034926073	0.0106402334081641
GO:0016818	MF	hydrolase activity, acting on acid anhydrides, in phosphorus-containing anhydrides	687	555	0.000306355034926073	0.0106402334081641
GO:0016922	MF	nuclear receptor binding	134	122	4.17270780127239e-05	0.00187887301470731
GO:0017076	MF	purine nucleotide binding	1796	1531	1.00771758798001e-20	6.37773264570462e-18
GO:0018130	BP	heterocycle biosynthetic process	3754	3018	3.93204883607954e-15	1.02974483541651e-12
GO:0018193	BP	peptidyl-amino acid modification	1215	976	0.000238813228056619	0.00865043018766615
GO:0019207	MF	kinase regulator activity	234	207	1.73918222782198e-06	0.000101085530302796
GO:0019216	BP	regulation of lipid metabolic process	333	274	0.00130597159105932	0.0364201428772283
GO:0019219	BP	regulation of nucleobase-containing compound metabolic process	3749	2997	1.40820922668351e-12	2.65162305956671e-10
GO:0019220	BP	regulation of phosphate metabolic process	1342	1103	1.86850542901947e-09	1.90053695065981e-07
GO:0019222	BP	regulation of metabolic process	6703	5090	3.79643109361853e-05	0.00171963988145138
GO:0019438	BP	aromatic compound biosynthetic process	3767	3030	1.89357827260949e-15	5.19798642929334e-13
GO:0019538	BP	protein metabolic process	5145	4083	6.31480464004872e-16	1.844570627165e-13
GO:0019637	BP	organophosphate metabolic process	974	799	1.17312686424153e-07	8.4930752761623e-06
GO:0019693	BP	ribose phosphate metabolic process	436	357	0.000366608753742146	0.0123016404201194
GO:0019725	BP	cellular homeostasis	732	593	0.00022665801078728	0.00826268178844381
GO:0019787	MF	ubiquitin-like protein transferase activity	428	357	0.000109139262302292	0.00437017390561587
GO:0019887	MF	protein kinase regulator activity	207	182	2.37419759126763e-05	0.00111995275195531
GO:0019898	CC	extrinsic component of membrane	301	256	0.000336291067875329	0.0115045881238311
GO:0019899	MF	enzyme binding	1977	1655	2.9576093377101e-16	9.10623934464687e-14
GO:0019900	MF	kinase binding	738	646	1.60080138763563e-13	3.25648739427591e-11
GO:0019901	MF	protein kinase binding	659	574	2.53194145959469e-11	3.65112368451933e-09
GO:0019904	MF	protein domain specific binding	653	555	2.1334073270732e-07	1.45097171761301e-05
GO:0019941	BP	modification-dependent protein catabolic process	641	549	7.57753590922679e-10	8.38090185222443e-08
GO:0021537	BP	telencephalon development	244	216	8.87153967034993e-06	0.0004604308880393
GO:0021543	BP	pallium development	165	146	0.000311136912659414	0.0107898682161828
GO:0021675	BP	nerve development	83	77	0.000316692990573348	0.0109160863800653
GO:0021987	BP	cerebral cortex development	110	101	0.000107476178140664	0.00431876056923615
GO:0022008	BP	neurogenesis	1606	1378	6.90259796953836e-18	2.66557274810105e-15
GO:0022402	BP	cell cycle process	1201	963	0.000110037161777317	0.00439069473543675
GO:0022407	BP	regulation of cell-cell adhesion	470	381	0.00188694884905465	0.0496280488516397
GO:0022414	BP	reproductive process	1385	1088	0.00035960812516714	0.0121562485516441
GO:0022603	BP	regulation of anatomical structure morphogenesis	938	764	0.000121907181194212	0.0047888503729809
GO:0022604	BP	regulation of cell morphogenesis	296	260	5.75039898477337e-06	0.000307551855561212
GO:0022607	BP	cellular component assembly	2796	2271	1.31542185608034e-13	2.74959372192059e-11
GO:0022803	MF	passive transmembrane transporter activity	467	398	5.41763994967011e-07	3.43831500315554e-05
GO:0022804	MF	active transmembrane transporter activity	386	327	2.93091085711796e-05	0.00137120889052516
GO:0022832	MF	voltage-gated channel activity	190	168	9.09023588276203e-05	0.00373174656491622
GO:0022834	MF	ligand-gated channel activity	138	124	0.000120168479894424	0.00472870232455018
GO:0022836	MF	gated channel activity	321	284	1.28508197743511e-07	9.14978367933796e-06
GO:0022843	MF	voltage-gated cation channel activity	147	130	0.000778611034903677	0.0237164088492585
GO:0022853	MF	active ion transmembrane transporter activity	259	221	0.000345020514365201	0.0117327573123832
GO:0022857	MF	transmembrane transporter activity	1049	873	1.74414094676576e-09	1.79002285275275e-07
GO:0022890	MF	inorganic cation transmembrane transporter activity	574	498	3.69355362091578e-10	4.25019826762349e-08
GO:0023051	BP	regulation of signaling	3299	2687	3.38249312474141e-16	1.01403583360669e-13
GO:0023052	BP	signaling	6053	4712	5.01945743793792e-12	8.73002429511278e-10
GO:0023056	BP	positive regulation of signaling	1688	1359	3.03617322290457e-07	2.00510639741037e-05
GO:0023057	BP	negative regulation of signaling	1363	1094	1.53651979266059e-05	0.000771102796387202
GO:0030001	BP	metal ion transport	867	725	1.20011851437139e-08	1.074849317142e-06
GO:0030010	BP	establishment of cell polarity	146	131	0.000277695313522963	0.00979413316301423
GO:0030027	CC	lamellipodium	196	173	0.00023069957338662	0.00839658000006511
GO:0030029	BP	actin filament-based process	781	667	6.21801522266395e-09	5.87847547025624e-07
GO:0030030	BP	cell projection organization	1478	1276	6.83059660144485e-19	3.09393232884869e-16
GO:0030031	BP	cell projection assembly	546	470	2.96801864821866e-08	2.46800499565745e-06
GO:0030036	BP	actin cytoskeleton organization	695	597	8.64419463253179e-09	7.9415052624034e-07
GO:0030054	CC	cell junction	2007	1723	7.36966098991477e-23	7.54198355470886e-20
GO:0030055	CC	cell-substrate junction	416	364	1.19031541003667e-07	8.55525119945601e-06
GO:0030100	BP	regulation of endocytosis	203	173	0.00146254933047741	0.040099547467626
GO:0030111	BP	regulation of Wnt signaling pathway	322	278	2.15006112586778e-05	0.00102698097886313
GO:0030133	CC	transport vesicle	398	331	0.000997769364730348	0.0291825124595844
GO:0030135	CC	coated vesicle	292	247	0.000246088843775173	0.00885764331212251
GO:0030136	CC	clathrin-coated vesicle	197	170	0.000378692503493984	0.0126697944193934
GO:0030154	BP	cell differentiation	4072	3291	1.64281006904157e-16	5.27180064972438e-14
GO:0030155	BP	regulation of cell adhesion	768	631	2.46143077138453e-05	0.00115870327882696
GO:0030163	BP	protein catabolic process	944	791	1.53651923389162e-09	1.63589038434517e-07
GO:0030177	BP	positive regulation of Wnt signaling pathway	136	121	0.000632919089423682	0.0198355275562987
GO:0030182	BP	neuron differentiation	1322	1142	1.76724486014403e-16	5.53134825594614e-14
GO:0030198	BP	extracellular matrix organization	303	258	0.000318416527534939	0.0109589156546164
GO:0030234	MF	enzyme regulator activity	1171	942	4.46943153007865e-05	0.00199278919728595
GO:0030278	BP	regulation of ossification	117	105	0.000324756287142969	0.0111434446479901
GO:0030282	BP	bone mineralization	116	104	0.000250033176577267	0.00898541939295971
GO:0030424	CC	axon	617	520	4.51784529005698e-05	0.00201044115407535
GO:0030425	CC	dendrite	589	510	1.93673017590293e-08	1.64650971372285e-06
GO:0030496	CC	midbody	197	168	0.00136157711459695	0.0377398698041081
GO:0030501	BP	positive regulation of bone mineralization	44	42	0.00180320599738593	0.0477168936636945
GO:0030516	BP	regulation of axon extension	87	80	0.00136577327064718	0.0378101800709907
GO:0030522	BP	intracellular receptor signaling pathway	258	227	2.44432681229024e-06	0.000139928497716635
GO:0030554	MF	adenyl nucleotide binding	1475	1284	7.61348410104915e-23	7.54198355470886e-20
GO:0030658	CC	transport vesicle membrane	208	178	0.00176914708191738	0.0470341273213599
GO:0030659	CC	cytoplasmic vesicle membrane	1128	938	4.08236226347199e-09	3.94120939876889e-07
GO:0030674	MF	protein-macromolecule adaptor activity	329	285	3.7762757086399e-06	0.000210363485930688
GO:0030695	MF	GTPase regulator activity	447	386	1.23205936880212e-06	7.29123133994479e-05
GO:0030863	CC	cortical cytoskeleton	104	95	0.000454639885360819	0.0148402795817492
GO:0030879	BP	mammary gland development	132	119	0.000157898462138767	0.00599593093561612
GO:0030900	BP	forebrain development	366	320	8.04230885081798e-07	4.99280558193561e-05
GO:0031023	BP	microtubule organizing center organization	147	127	0.0013801038983359	0.0381605427423364
GO:0031032	BP	actomyosin structure organization	200	172	0.00163207234126418	0.0437472190863095
GO:0031090	CC	organelle membrane	3457	2818	1.68543717290023e-20	9.36609769447777e-18
GO:0031098	BP	stress-activated protein kinase signaling cascade	232	200	0.000194088366382092	0.00722476729086496
GO:0031175	BP	neuron projection development	920	800	8.55696326736224e-13	1.68070561278949e-10
GO:0031214	BP	biomineral tissue development	164	142	0.00049086241906629	0.015796340898314
GO:0031224	CC	intrinsic component of membrane	5083	3840	6.43451238544661e-05	0.00275571297349653
GO:0031226	CC	intrinsic component of plasma membrane	1656	1305	6.52998673228034e-05	0.00278612767243961
GO:0031252	CC	cell leading edge	405	357	1.31344967767601e-07	9.29367622862428e-06
GO:0031253	CC	cell projection membrane	330	282	0.000203991520128673	0.00755730535709215
GO:0031267	MF	small GTPase binding	256	226	1.03769594199218e-05	0.000531300322299994
GO:0031323	BP	regulation of cellular metabolic process	5308	4234	4.46058371658656e-18	1.78298139295979e-15
GO:0031324	BP	negative regulation of cellular metabolic process	2172	1741	1.66645658402955e-08	1.45473359427315e-06
GO:0031325	BP	positive regulation of cellular metabolic process	2958	2432	8.67643287565492e-18	3.29473077731536e-15
GO:0031326	BP	regulation of cellular biosynthetic process	3841	3041	3.96586415879052e-11	5.4106735924481e-09
GO:0031327	BP	negative regulation of cellular biosynthetic process	1532	1224	7.54778988926259e-06	0.000395546198674074
GO:0031328	BP	positive regulation of cellular biosynthetic process	1926	1581	6.66815605274255e-11	8.93689808856977e-09
GO:0031329	BP	regulation of cellular catabolic process	756	638	6.15860626559794e-09	5.84657021480764e-07
GO:0031331	BP	positive regulation of cellular catabolic process	412	357	5.6666603416263e-08	4.40645697008921e-06
GO:0031344	BP	regulation of cell projection organization	628	554	1.12474202264155e-11	1.77959182249064e-09
GO:0031345	BP	negative regulation of cell projection organization	182	160	0.000340178135155878	0.0116027225020831
GO:0031346	BP	positive regulation of cell projection organization	333	292	1.87203702170653e-06	0.000107980991145726
GO:0031399	BP	regulation of protein modification process	1492	1210	1.1854955380816e-07	8.54757289229466e-06
GO:0031401	BP	positive regulation of protein modification process	954	780	4.1861130854474e-06	0.000229822651900804
GO:0031410	CC	cytoplasmic vesicle	2351	1900	1.10143032009409e-10	1.42585161437634e-08
GO:0031503	BP	protein-containing complex localization	172	149	0.00178468214723834	0.0473918392105808
GO:0031589	BP	cell-substrate adhesion	355	307	1.77089345232435e-05	0.000862137530293972
GO:0031623	BP	receptor internalization	115	102	0.00148603209777356	0.0406455646046493
GO:0031625	MF	ubiquitin protein ligase binding	283	241	0.000364175936623208	0.0122561071492218
GO:0031641	BP	regulation of myelination	48	46	0.000601504122337834	0.0189815372899518
GO:0031647	BP	regulation of protein stability	304	254	0.000619042634219073	0.0195079770097474
GO:0031965	CC	nuclear membrane	293	245	0.00141421250028783	0.0389147555634758
GO:0031967	CC	organelle envelope	1171	929	6.68451774115976e-05	0.00284141888460045
GO:0031974	CC	membrane-enclosed lumen	5653	4362	1.6542760607448e-09	1.70547627909545e-07
GO:0031975	CC	envelope	1171	929	6.68451774115976e-05	0.00284141888460045
GO:0031981	CC	nuclear lumen	4582	3540	3.65430856620717e-08	2.9842210169342e-06
GO:0031982	CC	vesicle	3870	3020	3.88439740051744e-08	3.14758400539044e-06
GO:0031984	CC	organelle subcompartment	1389	1132	6.90455382380261e-09	6.47380058936291e-07
GO:0032279	CC	asymmetric synapse	312	279	1.3916402218809e-07	9.8164491688342e-06
GO:0032355	BP	response to estradiol	118	104	0.00158296552394922	0.0428374993163067
GO:0032434	BP	regulation of proteasomal ubiquitin-dependent protein catabolic process	133	119	8.88492150779084e-05	0.00366728354408526
GO:0032436	BP	positive regulation of proteasomal ubiquitin-dependent protein catabolic process	90	84	3.35579098741843e-05	0.00154461296681498
GO:0032446	BP	protein modification by small protein conjugation	834	691	2.39100545846905e-07	1.61651834913231e-05
GO:0032456	BP	endocytic recycling	79	75	3.78691057130031e-05	0.00171874443140451
GO:0032501	BP	multicellular organismal process	7160	5511	1.33209994330842e-09	1.43841540797815e-07
GO:0032502	BP	developmental process	6150	4945	3.74678426683631e-23	4.06508251121898e-20
GO:0032509	BP	endosome transport via multivesicular body sorting pathway	40	38	0.000921357525175982	0.0272272501343834
GO:0032535	BP	regulation of cellular component size	347	305	3.67539080931388e-07	2.39942991975379e-05
GO:0032553	MF	ribonucleotide binding	1800	1534	1.17030308273494e-20	7.20653660460346e-18
GO:0032555	MF	purine ribonucleotide binding	1783	1521	9.04622158915497e-21	5.88883179106591e-18
GO:0032559	MF	adenyl ribonucleotide binding	1463	1273	2.1070026419288e-22	1.84638262283484e-19
GO:0032588	CC	trans-Golgi network membrane	95	85	0.00139141856223045	0.0384267642689195
GO:0032774	BP	RNA biosynthetic process	3282	2626	1.38817342735114e-11	2.15157437882778e-09
GO:0032869	BP	cellular response to insulin stimulus	204	175	0.000646142110196455	0.0201667148475562
GO:0032870	BP	cellular response to hormone stimulus	574	486	2.11446055197112e-07	1.45097171761301e-05
GO:0032879	BP	regulation of localization	2042	1663	1.12261472462016e-10	1.4369468475138e-08
GO:0032880	BP	regulation of protein localization	810	665	5.13119122508318e-05	0.00224825117062106
GO:0032934	MF	sterol binding	60	57	9.94203798450068e-05	0.00405222528513173
GO:0032940	BP	secretion by cell	777	628	0.0010054077243096	0.0293682174239358
GO:0032989	BP	cellular component morphogenesis	736	652	1.12720992657552e-13	2.4228632987827e-11
GO:0032990	BP	cell part morphogenesis	634	563	5.83226429597075e-12	9.8431340532887e-10
GO:0032991	CC	protein-containing complex	5444	4222	7.03708878678435e-11	9.37620063848506e-09
GO:0033036	BP	macromolecule localization	2803	2305	1.21128435741733e-17	4.45127464506395e-15
GO:0033043	BP	regulation of organelle organization	1136	933	4.1084332144508e-07	2.6517434095764e-05
GO:0033173	BP	calcineurin-NFAT signaling cascade	46	44	0.00084595404139349	0.0253274860435076
GO:0033365	BP	protein localization to organelle	876	741	3.35508766383362e-11	4.6328677171385e-09
GO:0033554	BP	cellular response to stress	1874	1522	1.934792074857e-09	1.94195165786528e-07
GO:0033555	BP	multicellular organismal response to stress	78	72	0.000650606399363389	0.0202782711396655
GO:0033674	BP	positive regulation of kinase activity	464	403	1.85539486926229e-08	1.58952884707331e-06
GO:0034067	BP	protein localization to Golgi apparatus	29	29	0.000502631629046568	0.0161068340874782
GO:0034220	BP	ion transmembrane transport	1091	920	5.47193054084824e-12	9.30391533154375e-10
GO:0034329	BP	cell junction assembly	405	344	0.00014940575059829	0.00574040577003614
GO:0034330	BP	cell junction organization	663	567	1.13275007181719e-07	8.27198001162913e-06
GO:0034446	BP	substrate adhesion-dependent cell spreading	109	98	0.00106220857805596	0.0306346332182621
GO:0034451	CC	centriolar satellite	98	90	0.000102210543048018	0.00414370998719936
GO:0034470	BP	ncRNA processing	409	337	1.03003405083582e-05	0.000528565221041518
GO:0034504	BP	protein localization to nucleus	298	249	0.00128524012250447	0.0358859202832619
GO:0034641	BP	cellular nitrogen compound metabolic process	6407	4863	3.39488625015534e-06	0.000190514995870787
GO:0034654	BP	nucleobase-containing compound biosynthetic process	3687	2961	2.28791740092144e-14	5.26544546086809e-12
GO:0034660	BP	ncRNA metabolic process	600	497	2.30224799231439e-07	1.56114340050271e-05
GO:0034702	CC	ion channel complex	281	251	1.0989626410346e-07	8.05104977920651e-06
GO:0034703	CC	cation channel complex	213	190	6.17366910916627e-06	0.000328646908839356
GO:0034762	BP	regulation of transmembrane transport	586	486	1.30951525600185e-05	0.000660088398069607
GO:0034765	BP	regulation of ion transmembrane transport	492	415	2.13277197934847e-06	0.000122400697172483
GO:0035091	MF	phosphatidylinositol binding	259	226	0.000112001002889693	0.00446124274447335
GO:0035295	BP	tube development	1111	894	0.000162748345521822	0.00614935042183946
GO:0035329	BP	hippo signaling	42	41	0.000900833648886972	0.0266899790068151
GO:0035556	BP	intracellular signal transduction	2532	2079	6.3826891962781e-15	1.59805704008791e-12
GO:0035591	MF	signaling adaptor activity	84	78	0.00027225969173103	0.00963224350372637
GO:0035639	MF	purine ribonucleoside triphosphate binding	1715	1464	3.56060072273154e-20	1.84374379242535e-17
GO:0035725	BP	sodium ion transmembrane transport	174	155	0.000105778118893286	0.00426557285108782
GO:0036064	CC	ciliary basal body	156	135	0.000897013612713299	0.0266114038438279
GO:0036094	MF	small molecule binding	2358	1980	7.852997260116e-22	5.771699663693e-19
GO:0036211	BP	protein modification process	3406	2786	2.21881048203379e-18	9.53837321182225e-16
GO:0036293	BP	response to decreased oxygen levels	292	245	0.00116584891523118	0.0331619246999093
GO:0036477	CC	somatodendritic compartment	807	688	6.96261246121095e-09	6.50148206214059e-07
GO:0040007	BP	growth	878	717	0.000135305833727651	0.00526076470247577
GO:0040008	BP	regulation of growth	593	484	0.00149340305069594	0.0407913414464805
GO:0040011	BP	locomotion	1367	1077	0.00071698473164857	0.0221205718479617
GO:0042175	CC	nuclear outer membrane-endoplasmic reticulum membrane network	1119	911	5.80871529156653e-08	4.50155677561401e-06
GO:0042176	BP	regulation of protein catabolic process	338	290	6.73161747024865e-06	0.000357251026382154
GO:0042325	BP	regulation of phosphorylation	1194	981	1.90941672312341e-08	1.62936893706531e-06
GO:0042327	BP	positive regulation of phosphorylation	776	643	5.30690027520576e-07	3.37744178408626e-05
GO:0042391	BP	regulation of membrane potential	413	347	0.000242775404192136	0.00876607735200257
GO:0042552	BP	myelination	139	122	0.00166610420123616	0.0445267997185486
GO:0042592	BP	homeostatic process	1626	1287	0.000159531689311022	0.00604787023171769
GO:0042626	MF	ATPase-coupled transmembrane transporter activity	94	85	0.00100773367153945	0.0293984685945643
GO:0042802	MF	identical protein binding	1899	1533	3.99277353041563e-09	3.87112136668041e-07
GO:0042803	MF	protein homodimerization activity	660	534	0.000873031576205299	0.0259675606165294
GO:0042981	BP	regulation of apoptotic process	1405	1112	0.000148404265035588	0.00571155874082913
GO:0042995	CC	cell projection	2269	1915	1.25520978319373e-20	7.39842887454687e-18
GO:0043005	CC	neuron projection	1307	1106	9.26573962009335e-12	1.48669444721273e-09
GO:0043009	BP	chordate embryonic development	637	545	3.92259441129463e-08	3.15803502003311e-06
GO:0043010	BP	camera-type eye development	334	281	0.00117626161887286	0.0334163899306723
GO:0043025	CC	neuronal cell body	476	402	7.30402178306457e-05	0.00305909618208351
GO:0043062	BP	extracellular structure organization	304	259	0.000293142824625825	0.0103070464757327
GO:0043067	BP	regulation of programmed cell death	1437	1136	0.000156224489652354	0.00595220530474787
GO:0043085	BP	positive regulation of catalytic activity	1117	927	4.26606589532965e-09	4.10118334848906e-07
GO:0043087	BP	regulation of GTPase activity	342	295	1.23232263528971e-05	0.000625328261078857
GO:0043130	MF	ubiquitin binding	92	82	0.00180195162971195	0.0477168936636945
GO:0043161	BP	proteasome-mediated ubiquitin-dependent protein catabolic process	432	371	1.88476017682688e-07	1.30128411723708e-05
GO:0043167	MF	ion binding	5657	4578	1.33285649463246e-26	3.03678023737059e-23
GO:0043168	MF	anion binding	2254	1901	5.83102649788892e-22	4.42847025759671e-19
GO:0043169	MF	cation binding	4076	3260	1.53236415705666e-14	3.63681093274781e-12
GO:0043178	MF	alcohol binding	88	79	0.00123322975967586	0.0346876779617184
GO:0043197	CC	dendritic spine	167	151	5.09407287921522e-05	0.00223628817880616
GO:0043226	CC	organelle	13507	10441	1.2467097163268e-25	2.18500262898383e-22
GO:0043227	CC	membrane-bounded organelle	12731	9846	1.17117172395278e-24	1.66774853490876e-21
GO:0043228	CC	non-membrane-bounded organelle	5278	4049	1.17420940659723e-07	8.4930752761623e-06
GO:0043229	CC	intracellular organelle	12665	9856	8.45783021716447e-30	2.40879004584844e-26
GO:0043231	CC	intracellular membrane-bounded organelle	11628	9044	2.63011290793776e-26	5.44768113585946e-23
GO:0043232	CC	intracellular non-membrane-bounded organelle	5277	4048	1.22397160005006e-07	8.76948708664797e-06
GO:0043233	CC	organelle lumen	5653	4362	1.6542760607448e-09	1.70547627909545e-07
GO:0043235	CC	receptor complex	386	331	1.89411529702339e-05	0.000916253140708724
GO:0043269	BP	regulation of ion transport	684	560	8.20966594548197e-05	0.00339471921781962
GO:0043412	BP	macromolecule modification	3622	2965	8.55429702696687e-21	5.73238539595333e-18
GO:0043413	BP	macromolecule glycosylation	221	186	0.00101632729943515	0.029538915300534
GO:0043434	BP	response to peptide hormone	404	333	0.00108807032976469	0.0313408272988099
GO:0043547	BP	positive regulation of GTPase activity	257	222	7.19158567366769e-05	0.00302311970459123
GO:0043549	BP	regulation of kinase activity	742	630	3.33045032078055e-09	3.24277692772068e-07
GO:0043632	BP	modification-dependent macromolecule catabolic process	653	558	1.20058549470109e-09	1.30881052207032e-07
GO:0043933	BP	protein-containing complex organization	1695	1341	5.15459782362882e-05	0.00225417191580727
GO:0044085	BP	cellular component biogenesis	3047	2473	3.0107568960759e-15	8.07024530825804e-13
GO:0044087	BP	regulation of cellular component biogenesis	911	754	5.54039343813466e-06	0.000297717745505802
GO:0044089	BP	positive regulation of cellular component biogenesis	477	401	0.000129194075134744	0.00504898423305318
GO:0044093	BP	positive regulation of molecular function	1492	1239	7.65135004934968e-12	1.24520256803131e-09
GO:0044237	BP	cellular metabolic process	9432	7295	3.85997625003692e-18	1.57045890858645e-15
GO:0044238	BP	primary metabolic process	9929	7634	1.83921223463007e-15	5.11031848217214e-13
GO:0044242	BP	cellular lipid catabolic process	218	182	0.00190086378614938	0.0498954844511837
GO:0044248	BP	cellular catabolic process	2011	1651	1.51875028040626e-13	3.11740598097082e-11
GO:0044249	BP	cellular biosynthetic process	5373	4272	3.57724707663556e-18	1.48189086171027e-15
GO:0044260	BP	cellular macromolecule metabolic process	3076	2460	8.96653859810328e-13	1.74609927708705e-10
GO:0044265	BP	cellular macromolecule catabolic process	958	795	2.04063298518765e-08	1.72839338046526e-06
GO:0044271	BP	cellular nitrogen compound biosynthetic process	4475	3550	5.04269661896366e-14	1.1154640754026e-11
GO:0044281	BP	small molecule metabolic process	1750	1381	9.16848242601917e-06	0.00047476068998732
GO:0044297	CC	cell body	540	456	1.80291695647508e-05	0.00087585628862107
GO:0044309	CC	neuron spine	168	151	0.000109908318971281	0.00439069473543675
GO:0044389	MF	ubiquitin-like protein ligase binding	302	257	0.000194381247774764	0.00722476729086496
GO:0044782	BP	cilium organization	374	320	3.16453443758136e-06	0.000178910056143558
GO:0044853	CC	plasma membrane raft	112	103	5.16782141371514e-05	0.00225562534655337
GO:0044877	MF	protein-containing complex binding	1242	1026	7.91038689222205e-09	7.32643312814582e-07
GO:0045121	CC	membrane raft	316	278	7.71684754789859e-07	4.80384301998146e-05
GO:0045137	BP	development of primary sexual characteristics	217	184	0.00110090193344442	0.03163045353291
GO:0045178	CC	basal part of cell	259	220	0.00144514958720743	0.0397180798491365
GO:0045184	BP	establishment of protein localization	1590	1300	2.48963412164689e-09	2.45557678907372e-07
GO:0045202	CC	synapse	1268	1090	9.58220842854891e-15	2.32256422166019e-12
GO:0045211	CC	postsynaptic membrane	251	219	0.000156893590003787	0.00596771878905889
GO:0045229	BP	external encapsulating structure organization	306	261	0.000213202158260484	0.00783483544162398
GO:0045296	MF	cadherin binding	328	279	0.000459092383541141	0.0149641786360534
GO:0045595	BP	regulation of cell differentiation	1562	1252	3.2170982482633e-05	0.0014879879683157
GO:0045597	BP	positive regulation of cell differentiation	877	709	0.000630108659935536	0.0197746497354976
GO:0045732	BP	positive regulation of protein catabolic process	197	172	0.00012315059722264	0.0048293686869546
GO:0045785	BP	positive regulation of cell adhesion	467	390	5.6977154766977e-05	0.00246331592829375
GO:0045859	BP	regulation of protein kinase activity	633	530	1.06739347696737e-06	6.38306902341852e-05
GO:0045860	BP	positive regulation of protein kinase activity	389	334	1.64764951507652e-06	9.60103492365819e-05
GO:0045892	BP	negative regulation of DNA-templated transcription	1181	980	9.48832145019234e-09	8.64727663684729e-07
GO:0045893	BP	positive regulation of DNA-templated transcription	1613	1335	1.87903242186095e-10	2.22978514060832e-08
GO:0045934	BP	negative regulation of nucleobase-containing compound metabolic process	1410	1165	1.44203977089402e-09	1.54978462924761e-07
GO:0045935	BP	positive regulation of nucleobase-containing compound metabolic process	1954	1612	4.9842102021924e-12	8.73002429511278e-10
GO:0045937	BP	positive regulation of phosphate metabolic process	854	707	2.12848866368971e-07	1.45097171761301e-05
GO:0045944	BP	positive regulation of transcription by RNA polymerase II	1188	984	4.59569886803942e-08	3.64837641147771e-06
GO:0046328	BP	regulation of JNK cascade	135	119	0.000789768120159437	0.0239282936831285
GO:0046483	BP	heterocycle metabolic process	5746	4389	9.07189633509524e-08	6.73270638758339e-06
GO:0046777	BP	protein autophosphorylation	214	192	8.51045634202032e-06	0.000443712213493343
GO:0046847	BP	filopodium assembly	65	62	0.000169511825757222	0.00639430039412675
GO:0046854	BP	phosphatidylinositol phosphate biosynthetic process	64	59	0.00159910374166085	0.0430458519710934
GO:0046872	MF	metal ion binding	3992	3189	1.04090608535986e-13	2.25866707131799e-11
GO:0046873	MF	metal ion transmembrane transporter activity	420	375	1.07840792989301e-10	1.40402550141042e-08
GO:0046903	BP	secretion	906	733	0.000186366564088442	0.00694955122126196
GO:0046907	BP	intracellular transport	1495	1242	4.2896599639772e-12	7.57640407901213e-10
GO:0048016	BP	inositol phosphate-mediated signaling	58	56	5.18194140241604e-05	0.00225746372681926
GO:0048168	BP	regulation of neuronal synaptic plasticity	54	52	0.000260104339147564	0.00927420541962144
GO:0048193	BP	Golgi vesicle transport	280	243	6.09478376209112e-06	0.000325207384626426
GO:0048468	BP	cell development	2069	1738	1.63731876726534e-16	5.27180064972438e-14
GO:0048471	CC	perinuclear region of cytoplasm	699	591	6.67774764314154e-08	5.10556383561533e-06
GO:0048511	BP	rhythmic process	293	249	0.0003564835067621	0.0120864884197436
GO:0048513	BP	animal organ development	3416	2777	7.81237116007562e-16	2.24434526127411e-13
GO:0048518	BP	positive regulation of biological process	5979	4790	5.23856571580068e-22	4.11570625064837e-19
GO:0048519	BP	negative regulation of biological process	5476	4165	0.000259213568945377	0.00925693096371705
GO:0048522	BP	positive regulation of cellular process	5349	4333	5.83406592416468e-25	8.86155720107787e-22
GO:0048523	BP	negative regulation of cellular process	4616	3666	6.98347032415628e-13	1.38357728578762e-10
GO:0048534	BP	hematopoietic or lymphoid organ development	923	735	0.00153860841888161	0.0418325229305474
GO:0048562	BP	embryonic organ morphogenesis	290	247	0.000835123301713788	0.0250361175082197
GO:0048565	BP	digestive tract development	128	114	0.000806702728170045	0.0243120568235798
GO:0048568	BP	embryonic organ development	440	378	2.54447189957559e-06	0.00014457169017439
GO:0048583	BP	regulation of response to stimulus	3839	3081	2.42511123453012e-15	6.57782551994455e-13
GO:0048584	BP	positive regulation of response to stimulus	2098	1673	3.25976107990104e-08	2.68124174889767e-06
GO:0048585	BP	negative regulation of response to stimulus	1627	1279	0.000416825235615839	0.0137836664270991
GO:0048589	BP	developmental growth	622	515	0.000155326590251006	0.00592790792676534
GO:0048592	BP	eye morphogenesis	157	138	0.000858118240255507	0.0256243328780884
GO:0048598	BP	embryonic morphogenesis	601	508	6.74236048737387e-06	0.000357251026382154
GO:0048608	BP	reproductive structure development	286	239	0.00176719995123891	0.0470341273213599
GO:0048638	BP	regulation of developmental growth	314	265	0.000731205267144605	0.0223921785035251
GO:0048646	BP	anatomical structure formation involved in morphogenesis	1202	962	0.000304118249853269	0.0105948474077322
GO:0048666	BP	neuron development	1061	922	1.15535738754441e-14	2.77091186503281e-12
GO:0048667	BP	cell morphogenesis involved in neuron differentiation	536	473	2.51558676428549e-09	2.47047969127072e-07
GO:0048699	BP	generation of neurons	1391	1204	6.00450977884938e-18	2.35873708278111e-15
GO:0048705	BP	skeletal system morphogenesis	223	201	1.05312126396094e-06	6.33095379369027e-05
GO:0048729	BP	tissue morphogenesis	615	526	6.28230977279195e-08	4.81939885061589e-06
GO:0048731	BP	system development	4232	3452	2.70145685222332e-20	1.46547602192991e-17
GO:0048754	BP	branching morphogenesis of an epithelial tube	151	137	3.76619457233508e-05	0.00171275403465235
GO:0048762	BP	mesenchymal cell differentiation	244	211	0.00018183450088799	0.00680281981647283
GO:0048812	BP	neuron projection morphogenesis	595	530	8.1397538941105e-12	1.31529186328662e-09
GO:0048813	BP	dendrite morphogenesis	130	123	1.1346994597355e-06	6.76779908131244e-05
GO:0048856	BP	anatomical structure development	5630	4552	5.80347576835896e-24	7.34591066146058e-21
GO:0048858	BP	cell projection morphogenesis	616	549	3.17073496826237e-12	5.73349408864205e-10
GO:0048863	BP	stem cell differentiation	241	214	3.96127017905215e-06	0.000218531670119913
GO:0048864	BP	stem cell development	88	80	0.00160023861567399	0.0430458519710934
GO:0048869	BP	cellular developmental process	4098	3311	1.77224553495465e-16	5.53134825594614e-14
GO:0048870	BP	cell motility	1696	1349	1.70834924978089e-05	0.000837054393699092
GO:0048880	BP	sensory system development	389	332	3.51191690589573e-05	0.00160997011637683
GO:0050681	MF	nuclear androgen receptor binding	26	26	0.00187162632141994	0.0493554792907776
GO:0050767	BP	regulation of neurogenesis	361	310	0.00010617937095444	0.00427418867107058
GO:0050770	BP	regulation of axonogenesis	145	134	1.7392742532359e-05	0.000849944622570677
GO:0050773	BP	regulation of dendrite development	95	90	1.64354231595467e-05	0.000812287811859245
GO:0050789	BP	regulation of biological process	11209	8535	1.21715043232103e-11	1.9125210655174e-09
GO:0050790	BP	regulation of catalytic activity	2241	1794	2.76624223949908e-08	2.30864700310428e-06
GO:0050793	BP	regulation of developmental process	2456	1987	3.03239801581712e-10	3.52500797920293e-08
GO:0050794	BP	regulation of cellular process	10343	8036	3.31717980085159e-20	1.75764243215355e-17
GO:0050804	BP	modulation of chemical synaptic transmission	430	367	2.25774338933994e-05	0.00107036400463005
GO:0050808	BP	synapse organization	399	342	3.18892574819704e-05	0.00148195813061147
GO:0050839	MF	cell adhesion molecule binding	544	466	8.32697275843724e-07	5.15548226435418e-05
GO:0050890	BP	cognition	301	262	7.47841182404692e-06	0.000393506085448233
GO:0050896	BP	response to stimulus	8320	6389	3.61012232871278e-11	4.95500163478264e-09
GO:0050905	BP	neuromuscular process	150	131	0.00095668225349429	0.0281252238240179
GO:0051020	MF	GTPase binding	286	248	0.000117364871944861	0.00464243271248563
GO:0051049	BP	regulation of transport	1714	1390	1.20297829999654e-08	1.074849317142e-06
GO:0051050	BP	positive regulation of transport	866	702	0.000169795272903873	0.00639440578155677
GO:0051054	BP	positive regulation of DNA metabolic process	289	243	0.00073400760867862	0.0224478246391056
GO:0051056	BP	regulation of small GTPase mediated signal transduction	285	254	1.06117681233211e-06	6.36259276109864e-05
GO:0051094	BP	positive regulation of developmental process	1324	1060	0.000269340578433889	0.00954378808559521
GO:0051098	BP	regulation of binding	360	306	1.64982216698134e-05	0.00081362658555201
GO:0051099	BP	positive regulation of binding	172	148	0.00103481193845609	0.0299963806689357
GO:0051128	BP	regulation of cellular component organization	2262	1875	2.02208328136943e-14	4.70113729415521e-12
GO:0051129	BP	negative regulation of cellular component organization	672	558	1.58883291130687e-05	0.000789589542374515
GO:0051130	BP	positive regulation of cellular component organization	1006	839	5.57998249896148e-08	4.35391511151844e-06
GO:0051171	BP	regulation of nitrogen compound metabolic process	5360	4222	1.23833709811975e-12	2.37094726416475e-10
GO:0051172	BP	negative regulation of nitrogen compound metabolic process	2307	1811	5.6725479994811e-05	0.00245709759734178
GO:0051173	BP	positive regulation of nitrogen compound metabolic process	2994	2437	4.3270245875612e-14	9.66538511794062e-12
GO:0051174	BP	regulation of phosphorus metabolic process	1343	1104	1.75719205504156e-09	1.79533021444247e-07
GO:0051179	BP	localization	5025	4114	3.79836564817629e-30	1.23631375611498e-26
GO:0051216	BP	cartilage development	194	167	0.00148283721240915	0.0406069267398197
GO:0051234	BP	establishment of localization	4423	3613	2.62337864629962e-25	4.26936136266362e-22
GO:0051239	BP	regulation of multicellular organismal process	2780	2182	5.181591593876e-06	0.000281759863663176
GO:0051240	BP	positive regulation of multicellular organismal process	1493	1175	0.00139855716848823	0.0385305036600193
GO:0051246	BP	regulation of protein metabolic process	2519	1970	4.2061950975651e-05	0.00188649506108117
GO:0051247	BP	positive regulation of protein metabolic process	1424	1152	3.45665068735254e-07	2.26311290978851e-05
GO:0051252	BP	regulation of RNA metabolic process	3445	2761	2.37803291383158e-12	4.36944370231764e-10
GO:0051253	BP	negative regulation of RNA metabolic process	1287	1068	2.1228266801197e-09	2.10289056868901e-07
GO:0051254	BP	positive regulation of RNA metabolic process	1758	1453	3.15843647007966e-11	4.41483537020215e-09
GO:0051298	BP	centrosome duplication	73	66	0.0016670189676932	0.0445267997185486
GO:0051301	BP	cell division	612	514	5.96457748705374e-07	3.76445799072112e-05
GO:0051338	BP	regulation of transferase activity	862	728	6.78844920623902e-10	7.58176601543872e-08
GO:0051347	BP	positive regulation of transferase activity	552	478	1.4762495983514e-09	1.57910191778583e-07
GO:0051403	BP	stress-activated MAPK cascade	225	193	0.0004489407273097	0.0146752733587148
GO:0051489	BP	regulation of filopodium assembly	48	46	0.000983462902413175	0.0288010524017761
GO:0051493	BP	regulation of cytoskeleton organization	513	424	0.000894192833217765	0.0265623070561063
GO:0051603	BP	proteolysis involved in protein catabolic process	733	622	8.32287044715351e-10	9.16078648637419e-08
GO:0051640	BP	organelle localization	550	463	1.01627323010315e-05	0.000523863558250454
GO:0051641	BP	cellular localization	3171	2633	3.07556651951983e-23	3.68808987267051e-20
GO:0051648	BP	vesicle localization	204	181	1.57809796143324e-05	0.000788495262133661
GO:0051649	BP	establishment of localization in cell	1992	1667	2.48273580051971e-17	8.83853944985017e-15
GO:0051650	BP	establishment of vesicle localization	189	166	0.000180892237074398	0.00677869856826164
GO:0051656	BP	establishment of organelle localization	420	355	4.75198238105816e-05	0.00210640401887216
GO:0051668	BP	localization within membrane	637	549	1.06061566256616e-09	1.16178207961094e-07
GO:0051716	BP	cellular response to stimulus	7020	5432	6.08042859685597e-12	1.01865062610858e-09
GO:0051960	BP	regulation of nervous system development	436	372	4.56426245436442e-05	0.00202713753918594
GO:0055074	BP	calcium ion homeostasis	296	246	0.00153052339900484	0.0416624195017039
GO:0055085	BP	transmembrane transport	1482	1221	3.11214432118077e-11	4.37698124776436e-09
GO:0055086	BP	nucleobase-containing small molecule metabolic process	630	509	0.000268215073865586	0.00953356044142515
GO:0055123	BP	digestive system development	139	122	0.00179254616829772	0.0475452525011586
GO:0060041	BP	retina development in camera-type eye	156	137	0.00115837373406102	0.0329904839460579
GO:0060070	BP	canonical Wnt signaling pathway	297	254	0.000132838831754035	0.00518253414843139
GO:0060090	MF	molecular adaptor activity	461	401	1.51015944478037e-08	1.33362297635178e-06
GO:0060271	BP	cilium assembly	345	297	3.85272104242679e-06	0.000213577606400613
GO:0060284	BP	regulation of cell development	497	421	4.77297189201273e-05	0.00211159983665278
GO:0060322	BP	head development	766	661	3.50029368960575e-10	4.04825844791763e-08
GO:0060341	BP	regulation of cellular localization	921	752	5.81785433908956e-05	0.00251049229662532
GO:0060349	BP	bone morphogenesis	96	89	0.000112199907653144	0.00446136596155189
GO:0060429	BP	epithelium development	1158	946	4.46516877066859e-07	2.85085643538289e-05
GO:0060485	BP	mesenchyme development	296	252	0.000391896804210796	0.0130540596303198
GO:0060491	BP	regulation of cell projection assembly	191	166	0.000480303212266144	0.0154783994176405
GO:0060541	BP	respiratory system development	205	179	0.000302017050487436	0.0105377587722906
GO:0060548	BP	negative regulation of cell death	973	777	0.000285616411531175	0.0100579355801025
GO:0060560	BP	developmental growth involved in morphogenesis	219	190	0.00133276761708012	0.0370314358384798
GO:0060562	BP	epithelial tube morphogenesis	326	284	1.1237390619975e-05	0.000572780107126419
GO:0060589	MF	nucleoside-triphosphatase regulator activity	447	386	1.23205936880212e-06	7.29123133994479e-05
GO:0060627	BP	regulation of vesicle-mediated transport	518	425	0.0010191898110344	0.0295811728084175
GO:0060828	BP	regulation of canonical Wnt signaling pathway	247	209	0.00159503498657523	0.0430074285611005
GO:0060996	BP	dendritic spine development	85	79	0.000386842564116456	0.0129045695180517
GO:0061024	BP	membrane organization	773	635	2.25967822255553e-05	0.00107036400463005
GO:0061061	BP	muscle structure development	669	547	0.000359210810586721	0.0121562485516441
GO:0061136	BP	regulation of proteasomal protein catabolic process	181	159	4.1905200417086e-05	0.00188317176785579
GO:0061138	BP	morphogenesis of a branching epithelium	182	163	3.52143562058968e-05	0.0016110921521991
GO:0061351	BP	neural precursor cell proliferation	146	131	0.000152913983817333	0.00585544908788926
GO:0061448	BP	connective tissue development	266	229	0.000240392909083143	0.00869382863579418
GO:0061564	BP	axon development	463	406	8.00199306090867e-08	5.97761999671289e-06
GO:0061629	MF	RNA polymerase II-specific DNA-binding transcription factor binding	337	300	1.72278622118894e-08	1.49816646044156e-06
GO:0061630	MF	ubiquitin protein ligase activity	296	247	0.0012425580564884	0.0348650772894478
GO:0061919	BP	process utilizing autophagic mechanism	525	440	7.56926538895261e-06	0.000395546198674074
GO:0061951	BP	establishment of protein localization to plasma membrane	60	56	0.00079672577950807	0.0241034557634769
GO:0065003	BP	protein-containing complex assembly	1506	1188	0.000210814302065718	0.00775968179959395
GO:0065007	BP	biological regulation	11891	9057	1.51222674145662e-12	2.82414541617604e-10
GO:0065008	BP	regulation of biological quality	3565	2880	3.22073252973416e-15	8.53269418110036e-13
GO:0065009	BP	regulation of molecular function	2941	2355	8.03471433726834e-11	1.06431936895536e-08
GO:0070013	CC	intracellular organelle lumen	5653	4362	1.6542760607448e-09	1.70547627909545e-07
GO:0070085	BP	glycosylation	240	200	0.00188849711878387	0.0496280488516397
GO:0070161	CC	anchoring junction	1266	1105	4.64074201936719e-19	2.15785032998494e-16
GO:0070167	BP	regulation of biomineral tissue development	96	86	0.000577289383964601	0.0182680018392354
GO:0070169	BP	positive regulation of biomineral tissue development	53	51	0.000160770682614842	0.00608471633338301
GO:0070482	BP	response to oxygen levels	317	267	0.000442922339632584	0.0145038063444905
GO:0070588	BP	calcium ion transmembrane transport	329	281	1.54907706393026e-05	0.000775696084056856
GO:0070647	BP	protein modification by small protein conjugation or removal	947	787	1.6172017342974e-08	1.41716631977815e-06
GO:0070727	BP	cellular macromolecule localization	2353	1950	1.38570875953683e-16	4.5756504894619e-14
GO:0070848	BP	response to growth factor	709	580	0.000197812715373048	0.00734033372485265
GO:0070887	BP	cellular response to chemical stimulus	2960	2312	5.42518207470117e-06	0.000293604152945348
GO:0070925	BP	organelle assembly	895	755	1.67140477040957e-10	2.02560033452189e-08
GO:0071310	BP	cellular response to organic substance	2346	1853	3.94020480313437e-07	2.55038710893788e-05
GO:0071363	BP	cellular response to growth factor stimulus	683	560	0.000173799434021897	0.00653439984282987
GO:0071375	BP	cellular response to peptide hormone stimulus	296	253	6.80774240208107e-05	0.00288304094589247
GO:0071383	BP	cellular response to steroid hormone stimulus	202	172	0.00190417734556074	0.0499249443512727
GO:0071407	BP	cellular response to organic cyclic compound	557	468	9.81459328373189e-07	5.99505880366079e-05
GO:0071417	BP	cellular response to organonitrogen compound	623	525	1.23738511426578e-07	8.83780013900675e-06
GO:0071495	BP	cellular response to endogenous stimulus	1325	1100	1.17625508252885e-10	1.49719529610823e-08
GO:0071559	BP	response to transforming growth factor beta	269	227	0.000751141192137003	0.0229410200022111
GO:0071560	BP	cellular response to transforming growth factor beta stimulus	264	223	0.000716987912051474	0.0221205718479617
GO:0071702	BP	organic substance transport	2346	1897	2.66031718407865e-11	3.78829167012799e-09
GO:0071704	BP	organic substance metabolic process	10851	8130	1.4597134327581e-05	0.000734174632493612
GO:0071705	BP	nitrogen compound transport	1913	1565	3.1929862990477e-11	4.43591462423797e-09
GO:0071805	BP	potassium ion transmembrane transport	215	184	0.00072509649307464	0.0222639820450747
GO:0071840	BP	cellular component organization or biogenesis	6130	5011	1.92228328942528e-34	1.45991008220885e-30
GO:0071897	BP	DNA biosynthetic process	187	162	0.000404694791848457	0.0134214936498912
GO:0071900	BP	regulation of protein serine/threonine kinase activity	366	306	0.000368267736525165	0.0123391354543961
GO:0071902	BP	positive regulation of protein serine/threonine kinase activity	204	176	0.000476472684889979	0.0154140309420417
GO:0071944	CC	cell periphery	5641	4417	7.62417380466822e-14	1.67028053813039e-11
GO:0071985	BP	multivesicular body sorting pathway	46	43	0.00159436914528611	0.0430074285611005
GO:0072001	BP	renal system development	309	263	0.000965790170956546	0.0283563959472602
GO:0072359	BP	circulatory system development	1164	930	0.00036323753005384	0.0122561071492218
GO:0072521	BP	purine-containing compound metabolic process	469	383	0.000313433753079707	0.0108365320639879
GO:0072522	BP	purine-containing compound biosynthetic process	227	191	0.000717481679935205	0.0221205718479617
GO:0072594	BP	establishment of protein localization to organelle	426	351	0.000313279098798729	0.0108365320639879
GO:0072657	BP	protein localization to membrane	550	467	4.36685243983763e-07	2.81057531043109e-05
GO:0072659	BP	protein localization to plasma membrane	274	241	5.25326523496916e-06	0.000284977131222708
GO:0080090	BP	regulation of primary metabolic process	5514	4349	1.14741901622614e-13	2.44325185660715e-11
GO:0080134	BP	regulation of response to stress	1364	1064	0.00158957301962016	0.0429618406631385
GO:0080135	BP	regulation of cellular response to stress	693	577	1.00900818351158e-06	6.12863684458018e-05
GO:0090066	BP	regulation of anatomical structure size	484	418	7.46394529072203e-08	5.64978503334919e-06
GO:0090304	BP	nucleic acid metabolic process	5067	3843	0.000105299075556361	0.00425378393169526
GO:0090407	BP	organophosphate biosynthetic process	568	473	5.50267407109393e-06	0.000296389896065731
GO:0097060	CC	synaptic membrane	355	308	2.36048683203453e-05	0.0011157952693169
GO:0097159	MF	organic cyclic compound binding	5882	4591	4.9551430672154e-13	9.9033315476698e-11
GO:0097367	MF	carbohydrate derivative binding	2143	1785	5.97959419931383e-17	2.03341901846517e-14
GO:0097435	BP	supramolecular fiber organization	774	628	0.00112464795751175	0.0321505383487424
GO:0097447	CC	dendritic tree	591	512	1.51761143682263e-08	1.33502930411454e-06
GO:0097485	BP	neuron projection guidance	230	202	0.000268943685287497	0.00954378808559521
GO:0097659	BP	nucleic acid-templated transcription	3267	2613	2.21046708378845e-11	3.20785235904688e-09
GO:0097708	CC	intracellular vesicle	2354	1903	9.25625326949712e-11	1.21904320515735e-08
GO:0097720	BP	calcineurin-mediated signaling	49	47	0.000466793038466301	0.0151501603823593
GO:0098588	CC	bounding membrane of organelle	2016	1668	3.02807419245583e-14	6.89916424009137e-12
GO:0098590	CC	plasma membrane region	1194	1015	3.1217459327793e-12	5.69006874659548e-10
GO:0098609	BP	cell-cell adhesion	914	752	2.88554929049762e-07	1.91117311147377e-05
GO:0098655	BP	cation transmembrane transport	889	747	1.25790128271745e-09	1.36476299168736e-07
GO:0098656	BP	anion transmembrane transport	248	213	0.00023357472653829	0.00847415058829363
GO:0098657	BP	import into cell	240	207	0.000314954916035646	0.0108726254650851
GO:0098660	BP	inorganic ion transmembrane transport	873	735	6.47833842867104e-10	7.27105727876064e-08
GO:0098661	BP	inorganic anion transmembrane transport	118	105	0.000644166713680476	0.0201488528485536
GO:0098662	BP	inorganic cation transmembrane transport	785	659	9.67502825098064e-09	8.78230452869892e-07
GO:0098687	CC	chromosomal region	370	304	0.000785419424022181	0.0238282239106809
GO:0098742	BP	cell-cell adhesion via plasma-membrane adhesion molecules	270	224	0.000940539769659953	0.0277221967812838
GO:0098772	MF	molecular function regulator activity	1866	1446	0.00123471325609874	0.0346876779617184
GO:0098793	CC	presynapse	497	427	2.49353259628914e-06	0.000142031616684629
GO:0098794	CC	postsynapse	588	513	4.66955587948237e-09	4.45151301916847e-07
GO:0098796	CC	membrane protein complex	1125	926	1.27992094061691e-08	1.13912963714905e-06
GO:0098797	CC	plasma membrane protein complex	554	466	3.24035555881834e-06	0.000182683098816963
GO:0098802	CC	plasma membrane signaling receptor complex	176	152	0.0011879543781301	0.0336646176011394
GO:0098827	CC	endoplasmic reticulum subcompartment	1100	894	1.2943358957406e-07	9.18696232042174e-06
GO:0098852	CC	lytic vacuole membrane	396	328	0.000784195855231775	0.0238228244874677
GO:0098857	CC	membrane microdomain	316	278	7.71684754789859e-07	4.80384301998146e-05
GO:0098858	CC	actin-based cell projection	214	185	0.000755150666370402	0.0230326007798972
GO:0098876	BP	vesicle-mediated transport to the plasma membrane	142	131	3.79538242482416e-06	0.00021091217845657
GO:0098878	CC	neurotransmitter receptor complex	41	41	4.98778404293251e-05	0.0021938546647524
GO:0098916	BP	anterograde trans-synaptic signaling	696	583	1.5643722618506e-06	9.13914297794974e-05
GO:0098978	CC	glutamatergic synapse	306	269	1.11083192252173e-05	0.000567470729209305
GO:0098984	CC	neuron to neuron synapse	335	299	9.30135461296419e-08	6.88058647733039e-06
GO:0099094	MF	ligand-gated cation channel activity	112	101	0.00036615247981028	0.0123016404201194
GO:0099177	BP	regulation of trans-synaptic signaling	431	368	2.04189453878799e-05	0.000981487872821635
GO:0099536	BP	synaptic signaling	723	606	1.00425413435798e-06	6.11789470513693e-05
GO:0099537	BP	trans-synaptic signaling	702	589	1.01139723207608e-06	6.12863684458018e-05
GO:0099572	CC	postsynaptic specialization	326	287	1.8158959640189e-06	0.000105008562548748
GO:0099601	BP	regulation of neurotransmitter receptor activity	59	56	0.000422622168099975	0.0139349109667002
GO:0106056	BP	regulation of calcineurin-mediated signaling	42	40	0.00165990520102586	0.0444409871917429
GO:0106106	BP	cold-induced thermogenesis	145	130	8.08392075221414e-05	0.00334880091669903
GO:0106310	MF	protein serine kinase activity	343	309	2.79779930447431e-09	2.73583945721642e-07
GO:0110148	BP	biomineralization	171	147	0.000821474012767835	0.0246763041909782
GO:0110149	BP	regulation of biomineralization	98	87	0.00105860072779993	0.0305692762765444
GO:0110151	BP	positive regulation of biomineralization	54	52	0.000134693964856284	0.00524592700048816
GO:0110165	CC	cellular anatomical entity	17417	13109	2.59602316581727e-10	3.04577565839378e-08
GO:0120025	CC	plasma membrane bounded cell projection	2161	1828	1.59221317847218e-20	9.06924626457753e-18
GO:0120031	BP	plasma membrane bounded cell projection assembly	535	461	3.085896134661e-08	2.5533979390582e-06
GO:0120032	BP	regulation of plasma membrane bounded cell projection assembly	189	164	0.00059916967266921	0.0189340940667063
GO:0120035	BP	regulation of plasma membrane bounded cell projection organization	612	540	2.03620512617871e-11	3.03221552907554e-09
GO:0120036	BP	plasma membrane bounded cell projection organization	1440	1243	2.47970202276624e-18	1.04625057197604e-15
GO:0120039	BP	plasma membrane bounded cell projection morphogenesis	611	544	6.14002513921198e-12	1.02112651658252e-09
GO:0120161	BP	regulation of cold-induced thermogenesis	145	130	8.08392075221414e-05	0.00334880091669903
GO:0120163	BP	negative regulation of cold-induced thermogenesis	46	45	0.000138493768292972	0.00536639798773312
GO:0140096	MF	catalytic activity, acting on a protein	2103	1739	3.23298435164868e-14	7.29310054138252e-12
GO:0140097	MF	catalytic activity, acting on DNA	220	188	0.000533551155070437	0.0169545739429914
GO:0140098	MF	catalytic activity, acting on RNA	365	303	0.000101652014073103	0.00413578480114568
GO:0140110	MF	transcription regulator activity	1802	1416	0.000469325849269216	0.0152106972258177
GO:0140297	MF	DNA-binding transcription factor binding	450	400	1.25458726267172e-10	1.5705778127864e-08
GO:0140352	BP	export from cell	846	683	0.000476952765718899	0.0154140309420417
GO:0140513	CC	nuclear protein-containing complex	1172	949	3.24730754129522e-06	0.000182683098816963
GO:0140535	CC	intracellular protein-containing complex	838	696	4.62194654956571e-08	3.6564732703231e-06
GO:0140640	MF	catalytic activity, acting on a nucleic acid	560	469	3.45081381840721e-07	2.26311290978851e-05
GO:0140657	MF	ATP-dependent activity	524	450	3.96355467013861e-08	3.17977569029712e-06
GO:0140694	BP	non-membrane-bounded organelle assembly	370	309	7.18510889567029e-05	0.00302311970459123
GO:0150063	BP	visual system development	383	326	7.0078314594667e-05	0.00296227146516678
GO:0150104	BP	transport across blood-brain barrier	84	78	0.000295255792494151	0.0103493968864411
GO:0198738	BP	cell-cell signaling by wnt	437	377	7.44937310504963e-07	4.67566162053584e-05
GO:1900180	BP	regulation of protein localization to nucleus	132	117	0.000526004182123248	0.0167380995607487
GO:1901135	BP	carbohydrate derivative metabolic process	1051	835	0.00025898237761723	0.00925693096371705
GO:1901137	BP	carbohydrate derivative biosynthetic process	632	517	3.07498827044088e-05	0.00143273073116002
GO:1901265	MF	nucleoside phosphate binding	2030	1726	1.43959870744447e-22	1.36665903960061e-19
GO:1901293	BP	nucleoside phosphate biosynthetic process	281	234	0.000722637059259893	0.0222321035559071
GO:1901360	BP	organic cyclic compound metabolic process	6031	4613	8.10259366313823e-09	7.47406858384378e-07
GO:1901362	BP	organic cyclic compound biosynthetic process	3914	3146	4.37442809214821e-16	1.29437622924032e-13
GO:1901363	MF	heterocyclic compound binding	5814	4532	3.52696040754111e-12	6.32742251381233e-10
GO:1901564	BP	organonitrogen compound metabolic process	6122	4859	7.04515601831292e-20	3.48949640698351e-17
GO:1901565	BP	organonitrogen compound catabolic process	1279	1053	1.94350761810692e-09	1.94214375311176e-07
GO:1901566	BP	organonitrogen compound biosynthetic process	1704	1331	7.22927847857506e-05	0.00303336797156269
GO:1901575	BP	organic substance catabolic process	1996	1632	1.36570537698391e-12	2.59301927576678e-10
GO:1901576	BP	organic substance biosynthetic process	5437	4331	1.7929904922784e-19	8.51072820334813e-17
GO:1901652	BP	response to peptide	489	403	0.000273327049208675	0.00965501316150456
GO:1901653	BP	cellular response to peptide	360	305	3.31711984197411e-05	0.00152990401780442
GO:1901698	BP	response to nitrogen compound	1083	887	1.14081042248659e-07	8.30422513288642e-06
GO:1901699	BP	cellular response to nitrogen compound	674	567	5.07755985604351e-08	3.97732862609718e-06
GO:1901700	BP	response to oxygen-containing compound	1620	1280	0.000108701130738095	0.00436029324425484
GO:1901701	BP	cellular response to oxygen-containing compound	1167	927	0.000253633075472811	0.00910043463239767
GO:1901800	BP	positive regulation of proteasomal protein catabolic process	113	102	0.000117347185779071	0.00464243271248563
GO:1901981	MF	phosphatidylinositol phosphate binding	168	147	0.00110861240764834	0.0318055442997575
GO:1902494	CC	catalytic complex	1548	1265	6.84963453093572e-10	7.61278405623607e-08
GO:1902495	CC	transmembrane transporter complex	351	308	4.99149325137936e-08	3.9351620152051e-06
GO:1902531	BP	regulation of intracellular signal transduction	1675	1357	4.18935470103124e-08	3.34913184239634e-06
GO:1902533	BP	positive regulation of intracellular signal transduction	971	777	0.000425771957557527	0.014018480174842
GO:1902679	BP	negative regulation of RNA biosynthetic process	1184	982	1.03594255362108e-08	9.36623616734237e-07
GO:1902680	BP	positive regulation of RNA biosynthetic process	1619	1340	1.59366328457415e-10	1.9417125281143e-08
GO:1903047	BP	mitotic cell cycle process	759	612	0.00119539606649605	0.0337894221632683
GO:1903050	BP	regulation of proteolysis involved in protein catabolic process	212	186	9.20493221357083e-06	0.000475567291505664
GO:1903052	BP	positive regulation of proteolysis involved in protein catabolic process	129	116	6.79266389292324e-05	0.0028820121813103
GO:1903506	BP	regulation of nucleic acid-templated transcription	3158	2522	1.78111180783764e-10	2.14713499628427e-08
GO:1903507	BP	negative regulation of nucleic acid-templated transcription	1183	981	1.15646363262023e-08	1.04145720970828e-06
GO:1903508	BP	positive regulation of nucleic acid-templated transcription	1613	1335	1.87903242186095e-10	2.22978514060832e-08
GO:1903829	BP	positive regulation of protein localization	435	363	0.000338779610206165	0.0115723457855131
GO:1905114	BP	cell surface receptor signaling pathway involved in cell-cell signaling	553	478	1.82576928172276e-08	1.57569421646861e-06
GO:1990234	CC	transferase complex	776	640	9.78211542600063e-07	5.99128273833329e-05
GO:1990351	CC	transporter complex	375	328	4.50286110839451e-08	3.58717438789023e-06
GO:1990778	BP	protein localization to cell periphery	322	281	4.45515296862368e-06	0.000243420156443938
GO:1990845	BP	adaptive thermogenesis	157	140	7.52731074885398e-05	0.00313532446255739
GO:2000026	BP	regulation of multicellular organismal development	1405	1113	0.00053758657368643	0.0170590146168129
GO:2000058	BP	regulation of ubiquitin-dependent protein catabolic process	161	143	6.10582078198594e-05	0.00262481171125977
GO:2000060	BP	positive regulation of ubiquitin-dependent protein catabolic process	105	97	3.19365099249575e-05	0.00148195813061147
GO:2001020	BP	regulation of response to DNA damage stimulus	300	252	0.000682314324974573	0.0211796315806821
GO:2001022	BP	positive regulation of response to DNA damage stimulus	160	140	0.000342396574720148	0.011660932075372
GO:2001141	BP	regulation of RNA biosynthetic process	3166	2529	1.36635859524826e-10	1.69190838229002e-08

## Sheet: male
	ONTOLOGY	Description	N	DE	P.DE	FDR
hsa00340	KEGG	Histidine metabolism	20	19	0.00510726409092638	0.0355095979961388
hsa01100	KEGG	Metabolic pathways	1455	1027	0.00178178842529702	0.0225905318207301
hsa01521	KEGG	EGFR tyrosine kinase inhibitor resistance	77	70	0.000123890591385213	0.00293207732945003
hsa01522	KEGG	Endocrine resistance	95	84	9.8607855503975e-05	0.00281815828624382
hsa04010	KEGG	MAPK signaling pathway	288	229	0.00120976077239989	0.0186723945305201
hsa04012	KEGG	ErbB signaling pathway	80	74	1.33582198306571e-05	0.000948433607976657
hsa04014	KEGG	Ras signaling pathway	227	182	0.000747541475214301	0.0126370106524322
hsa04015	KEGG	Rap1 signaling pathway	207	168	0.00175078079739126	0.0225905318207301
hsa04020	KEGG	Calcium signaling pathway	241	191	0.00264122773795845	0.0253415093777094
hsa04024	KEGG	cAMP signaling pathway	218	171	0.00418986829846357	0.0323348531729254
hsa04071	KEGG	Sphingolipid signaling pathway	120	98	0.00530143294026861	0.0355095979961388
hsa04072	KEGG	Phospholipase D signaling pathway	144	128	1.24465704791587e-06	0.000220926626005067
hsa04141	KEGG	Protein processing in endoplasmic reticulum	162	126	0.00340073380224788	0.0280758255766976
hsa04144	KEGG	Endocytosis	240	194	0.000173605864956016	0.00362529894466974
hsa04150	KEGG	mTOR signaling pathway	151	123	0.00168588974165899	0.0225905318207301
hsa04151	KEGG	PI3K-Akt signaling pathway	339	268	0.000111138636640601	0.00281815828624382
hsa04152	KEGG	AMPK signaling pathway	118	98	0.00259797276508978	0.0253415093777094
hsa04211	KEGG	Longevity regulating pathway	88	75	0.00192192218228028	0.0235269784382586
hsa04261	KEGG	Adrenergic signaling in cardiomyocytes	148	119	0.00792564417998345	0.0485104083430021
hsa04310	KEGG	Wnt signaling pathway	168	137	0.00210735658476162	0.0241326318577541
hsa04330	KEGG	Notch signaling pathway	60	52	0.00440690444825945	0.0332861931730235
hsa04340	KEGG	Hedgehog signaling pathway	56	50	0.00300073672972207	0.0265040007956924
hsa04360	KEGG	Axon guidance	175	150	5.6222058919668e-05	0.00249485386456027
hsa04371	KEGG	Apelin signaling pathway	138	110	0.00562221888423556	0.0369608834056227
hsa04390	KEGG	Hippo signaling pathway	154	127	0.00158307397829262	0.0224796504917552
hsa04510	KEGG	Focal adhesion	195	168	5.84025358085892e-06	0.000691096673734972
hsa04520	KEGG	Adherens junction	92	78	0.00300597185067299	0.0265040007956924
hsa04660	KEGG	T cell receptor signaling pathway	115	94	0.00528991257331831	0.0355095979961388
hsa04662	KEGG	B cell receptor signaling pathway	78	64	0.00598229350186575	0.0379774801518345
hsa04666	KEGG	Fc gamma R-mediated phagocytosis	91	77	0.00246363374288393	0.0249882851063942
hsa04720	KEGG	Long-term potentiation	64	55	0.00665891210156534	0.0414721718606262
hsa04722	KEGG	Neurotrophin signaling pathway	114	100	3.47270225970183e-05	0.00176115614599164
hsa04725	KEGG	Cholinergic synapse	112	93	0.00374430992021372	0.029811144828208
hsa04810	KEGG	Regulation of actin cytoskeleton	218	174	0.0020065776246986	0.0237445018922668
hsa04910	KEGG	Insulin signaling pathway	131	108	0.00127312446465258	0.0188316327063194
hsa04912	KEGG	GnRH signaling pathway	91	76	0.00377887751343482	0.029811144828208
hsa04917	KEGG	Prolactin signaling pathway	70	62	0.000338442905635781	0.00632353850003696
hsa04919	KEGG	Thyroid hormone signaling pathway	117	106	1.11116991392202e-06	0.000220926626005067
hsa04926	KEGG	Relaxin signaling pathway	125	101	0.00493488076704024	0.0350376534459857
hsa04929	KEGG	GnRH secretion	62	57	0.000108094326344818	0.00281815828624382
hsa04930	KEGG	Type II diabetes mellitus	45	41	0.002311708605147	0.0248683804493086
hsa04935	KEGG	Growth hormone synthesis, secretion and action	115	99	0.000289785360529678	0.00571521127711309
hsa05100	KEGG	Bacterial invasion of epithelial cells	76	68	0.000157156258999568	0.00348690449655291
hsa05131	KEGG	Shigellosis	237	181	0.00486446942430314	0.0350376534459857
hsa05135	KEGG	Yersinia infection	130	106	0.00306102544400954	0.0265040007956924
hsa05165	KEGG	Human papillomavirus infection	319	256	2.39298259295797e-05	0.0014158480341668
hsa05200	KEGG	Pathways in cancer	506	393	9.81360046480634e-05	0.00281815828624382
hsa05202	KEGG	Transcriptional misregulation in cancer	181	142	0.00322762072185768	0.0272810799109399
hsa05205	KEGG	Proteoglycans in cancer	199	165	9.14453233569639e-05	0.00281815828624382
hsa05210	KEGG	Colorectal cancer	84	73	0.000532212805181358	0.0094467772919691
hsa05211	KEGG	Renal cell carcinoma	65	56	0.00599081377043023	0.0379774801518345
hsa05213	KEGG	Endometrial cancer	56	50	0.00222154021861056	0.0246452118002109
hsa05215	KEGG	Prostate cancer	94	85	8.04953697655746e-06	0.000714396406669474
hsa05220	KEGG	Chronic myeloid leukemia	74	64	0.00246285332770957	0.0249882851063942
hsa05221	KEGG	Acute myeloid leukemia	63	56	0.000835374345329713	0.0134799042087295
hsa05224	KEGG	Breast cancer	145	117	0.0045798669788762	0.0338719328646052
hsa05230	KEGG	Central carbon metabolism in cancer	67	58	0.00273348962998829	0.0255365478591011
hsa05231	KEGG	Choline metabolism in cancer	95	84	0.000100317799503206	0.00281815828624382
GO:0000122	BP	negative regulation of transcription by RNA polymerase II	873	659	3.77211278670055e-05	0.00283642962812493
GO:0000139	CC	Golgi membrane	633	492	3.63163559907737e-07	4.30954091090515e-05
GO:0000166	MF	nucleotide binding	2029	1541	7.17773197023889e-12	3.33749888183516e-09
GO:0000278	BP	mitotic cell cycle	913	677	7.07982979318055e-05	0.00484404930954431
GO:0000785	CC	chromatin	1203	878	0.000471231283429043	0.0237009570897292
GO:0000902	BP	cell morphogenesis	971	795	1.89566042208989e-13	1.66118180988062e-10
GO:0000904	BP	cell morphogenesis involved in differentiation	688	570	2.67868812313845e-11	9.24715609054341e-09
GO:0001221	MF	transcription coregulator binding	105	92	0.000104666854814736	0.0067941014817634
GO:0001501	BP	skeletal system development	520	399	0.000815326197181096	0.0367849348050972
GO:0001540	MF	amyloid-beta binding	78	67	0.00114698956543753	0.0483050097207552
GO:0001654	BP	eye development	379	299	0.00013949229528417	0.00863639254281125
GO:0001701	BP	in utero embryonic development	380	298	7.91711142151273e-05	0.00530539607728665
GO:0001764	BP	neuron migration	167	143	2.5906400674728e-05	0.00205662520199653
GO:0001894	BP	tissue homeostasis	261	204	0.000372426688633258	0.019825630079019
GO:0002520	BP	immune system development	981	733	7.2306750276085e-07	7.99726698199185e-05
GO:0002521	BP	leukocyte differentiation	569	421	0.000627238170590994	0.0296493661384755
GO:0003674	MF	molecular_function	16813	11400	8.73539706024526e-06	0.000765489563925493
GO:0003677	MF	DNA binding	2341	1643	0.000586769771192714	0.0280860556026361
GO:0003712	MF	transcription coregulator activity	463	362	9.52215125911144e-05	0.00628848389239406
GO:0003713	MF	transcription coactivator activity	258	204	0.00108511167968693	0.0461644689498122
GO:0003779	MF	actin binding	414	343	3.50633568670569e-08	4.9930220178689e-06
GO:0003824	MF	catalytic activity	5121	3670	3.09081213713222e-12	1.85318588769528e-09
GO:0004672	MF	protein kinase activity	539	439	4.56227531141069e-08	6.338224432633e-06
GO:0004674	MF	protein serine/threonine kinase activity	407	327	2.56133508176992e-05	0.00204047057702957
GO:0005085	MF	guanyl-nucleotide exchange factor activity	216	180	5.77235281183711e-05	0.00402193536589898
GO:0005096	MF	GTPase activator activity	242	195	0.00067024217083331	0.031421394280383
GO:0005215	MF	transporter activity	1155	849	0.00012195564943485	0.00776155730928389
GO:0005488	MF	binding	15274	10512	7.75287037624782e-13	5.35276965613425e-10
GO:0005509	MF	calcium ion binding	675	501	0.000796558270371273	0.0362975672642782
GO:0005515	MF	protein binding	13047	9169	1.0158912980521e-19	5.78651683370479e-16
GO:0005524	MF	ATP binding	1402	1104	2.72796650632863e-13	2.30199958815524e-10
GO:0005604	CC	basement membrane	94	82	0.000440518380698475	0.022549363479508
GO:0005622	CC	intracellular anatomical structure	14178	9802	5.68467903630378e-15	6.47598635815727e-12
GO:0005634	CC	nucleus	7421	5092	1.06089047742951e-06	0.000114556059894569
GO:0005654	CC	nucleoplasm	3907	2862	7.11984860446394e-13	5.06933220637832e-10
GO:0005667	CC	transcription regulator complex	480	379	1.6590509632152e-06	0.000175409541676155
GO:0005694	CC	chromosome	1748	1271	1.95555250064839e-05	0.0016027089271501
GO:0005737	CC	cytoplasm	11280	8039	2.06778556132203e-24	4.71124262291611e-20
GO:0005768	CC	endosome	963	722	5.25152045750614e-05	0.00370435424470031
GO:0005769	CC	early endosome	392	303	0.00110036546717002	0.0466866420931132
GO:0005789	CC	endoplasmic reticulum membrane	1098	803	1.71223000344302e-05	0.00143568059642096
GO:0005794	CC	Golgi apparatus	1547	1147	4.50487252797927e-06	0.000427662565322832
GO:0005815	CC	microtubule organizing center	801	597	0.000611653442239186	0.0290331500582867
GO:0005829	CC	cytosol	5130	3755	4.3855379520201e-17	8.32667472490216e-14
GO:0005856	CC	cytoskeleton	2255	1651	1.23446661316542e-07	1.56256040635339e-05
GO:0005886	CC	plasma membrane	5180	3615	1.80165692008371e-06	0.000186586142123579
GO:0005905	CC	clathrin-coated pit	69	61	0.00105543425531526	0.0452862788570674
GO:0005911	CC	cell-cell junction	478	385	3.87777382453967e-07	4.55418550609855e-05
GO:0005912	CC	adherens junction	170	149	3.62339258650895e-06	0.000352800755089829
GO:0005925	CC	focal adhesion	408	336	4.88609394996864e-08	6.70631111783648e-06
GO:0005938	CC	cell cortex	302	242	0.000529861811725756	0.0260180420654302
GO:0005975	BP	carbohydrate metabolic process	562	424	0.000123908700806857	0.00786388813143017
GO:0006139	BP	nucleobase-containing compound metabolic process	5584	3785	0.000877848934169161	0.0389849910373853
GO:0006351	BP	DNA-templated transcription	3265	2372	1.45741266820611e-10	3.53252023749022e-08
GO:0006355	BP	regulation of DNA-templated transcription	3156	2294	2.71068231324962e-10	6.05492017892936e-08
GO:0006357	BP	regulation of transcription by RNA polymerase II	2386	1744	5.62727569031263e-09	8.96586358937643e-07
GO:0006366	BP	transcription by RNA polymerase II	2467	1802	3.84896455152048e-09	6.26391488156018e-07
GO:0006468	BP	protein phosphorylation	1493	1113	5.13417362069516e-07	5.87824179768435e-05
GO:0006725	BP	cellular aromatic compound metabolic process	5799	3937	0.000307083382054378	0.0168187206171321
GO:0006793	BP	phosphorus metabolic process	2671	1967	9.47450675227633e-10	1.81400976339381e-07
GO:0006796	BP	phosphate-containing compound metabolic process	2646	1946	2.13102611161629e-09	3.67828022174739e-07
GO:0006807	BP	nitrogen compound metabolic process	9448	6473	3.81462803536265e-09	6.25269677393544e-07
GO:0006810	BP	transport	4270	3099	1.1879777365299e-11	5.20517014405717e-09
GO:0006811	BP	ion transport	1489	1083	9.1300397457279e-05	0.00604705888275188
GO:0006812	BP	cation transport	1148	845	0.00013071166475607	0.00818168837857776
GO:0006836	BP	neurotransmitter transport	202	168	0.0001180839804797	0.00757866313028023
GO:0006897	BP	endocytosis	564	429	0.000569453116129418	0.0276051485061546
GO:0006915	BP	apoptotic process	1822	1309	0.000103384931933803	0.00673006368337077
GO:0006950	BP	response to stress	3729	2584	0.000131613764530671	0.00819313664225906
GO:0006974	BP	cellular response to DNA damage stimulus	827	615	0.000124846418468707	0.00786648182529035
GO:0006996	BP	organelle organization	3373	2479	1.56598539573186e-12	9.9273615882338e-10
GO:0007010	BP	cytoskeleton organization	1431	1093	2.77542936602895e-09	4.68410242041508e-07
GO:0007015	BP	actin filament organization	428	342	1.49578572966634e-05	0.00127640382264861
GO:0007044	BP	cell-substrate junction assembly	93	82	0.000545363995083095	0.0265504838761689
GO:0007049	BP	cell cycle	1726	1259	3.29380412990196e-06	0.000324874603011629
GO:0007154	BP	cell communication	6111	4246	5.43186558551592e-06	0.00050514132857304
GO:0007155	BP	cell adhesion	1470	1088	4.61194139422828e-06	0.000436010260274262
GO:0007165	BP	signal transduction	5573	3849	4.98744780255754e-05	0.0035651380053713
GO:0007166	BP	cell surface receptor signaling pathway	2635	1913	6.47876308708362e-08	8.69432862998915e-06
GO:0007167	BP	enzyme-linked receptor protein signaling pathway	966	733	3.54514820956455e-06	0.000346663763118965
GO:0007169	BP	transmembrane receptor protein tyrosine kinase signaling pathway	619	486	2.45608025534438e-07	3.07468860097617e-05
GO:0007173	BP	epidermal growth factor receptor signaling pathway	107	93	3.68711812057023e-05	0.00278445518615277
GO:0007176	BP	regulation of epidermal growth factor-activated receptor activity	28	28	3.69077188473551e-05	0.00278445518615277
GO:0007264	BP	small GTPase mediated signal transduction	474	379	9.58805065845196e-06	0.000836989065908695
GO:0007265	BP	Ras protein signal transduction	329	263	0.000140791622217998	0.00866971978544558
GO:0007267	BP	cell-cell signaling	1588	1192	5.21423668139893e-08	7.11384242808342e-06
GO:0007268	BP	chemical synaptic transmission	696	531	0.000160666765110465	0.00965865851260379
GO:0007269	BP	neurotransmitter secretion	144	121	0.000437428184724993	0.022446765226969
GO:0007275	BP	multicellular organism development	4685	3480	2.37499991145775e-18	6.76399974783166e-15
GO:0007399	BP	nervous system development	2376	1856	6.038434353692e-19	2.75159376629037e-15
GO:0007409	BP	axonogenesis	417	348	5.38098572350823e-08	7.29764159073877e-06
GO:0007411	BP	axon guidance	229	195	4.00801809059553e-06	0.000386943577017494
GO:0007417	BP	central nervous system development	1002	791	9.81580471674584e-10	1.8587160045261e-07
GO:0007420	BP	brain development	721	567	6.59293394069063e-07	7.36340229924977e-05
GO:0007423	BP	sensory organ development	560	429	0.000514375348924746	0.0254219695225627
GO:0007517	BP	muscle organ development	337	263	0.000443948919069832	0.0226284836064587
GO:0007519	BP	skeletal muscle tissue development	157	130	0.000239215546856102	0.0135242854083609
GO:0007610	BP	behavior	609	483	4.1202985993771e-08	5.79486933877826e-06
GO:0007611	BP	learning or memory	263	218	2.97230033796547e-06	0.00029702145131669
GO:0007612	BP	learning	145	121	0.000665338633178144	0.0312558256048058
GO:0007623	BP	circadian rhythm	203	165	0.00014811035195208	0.00902285095956199
GO:0007626	BP	locomotory behavior	193	162	1.7472434466218e-05	0.00145289031707413
GO:0008017	MF	microtubule binding	257	203	0.00101808842416914	0.043990886789842
GO:0008047	MF	enzyme activator activity	516	399	5.24968790274865e-05	0.00370435424470031
GO:0008092	MF	cytoskeletal protein binding	947	760	1.28376616663208e-11	5.41654228528616e-09
GO:0008104	BP	protein localization	2343	1738	1.795496804505e-09	3.17120923983271e-07
GO:0008134	MF	transcription factor binding	567	449	4.68099227341578e-07	5.41379329733529e-05
GO:0008170	MF	N-methyltransferase activity	96	79	0.00110299355101141	0.0467111618331672
GO:0008219	BP	cell death	2038	1470	7.13229211343572e-06	0.000639772218553226
GO:0008270	MF	zinc ion binding	762	575	2.26470538570549e-06	0.000231385863264188
GO:0008283	BP	cell population proliferation	1949	1386	0.000209944721252225	0.0121098241240777
GO:0008289	MF	lipid binding	786	583	0.00068223218211222	0.0317224041576425
GO:0008324	MF	cation transmembrane transporter activity	621	472	0.000253269476680194	0.0141433621487293
GO:0008654	BP	phospholipid biosynthetic process	246	195	0.000400666595609725	0.020841981083041
GO:0009056	BP	catabolic process	2431	1731	0.00021346914452979	0.0122510856145258
GO:0009058	BP	biosynthetic process	5517	3934	4.10060353052391e-13	3.11427169464856e-10
GO:0009059	BP	macromolecule biosynthetic process	4438	3168	9.28024462252724e-11	2.43035739631794e-08
GO:0009314	BP	response to radiation	433	337	5.16468445026541e-06	0.000484695059834961
GO:0009416	BP	response to light stimulus	305	242	2.16236610459852e-05	0.00175328645292429
GO:0009605	BP	response to external stimulus	2613	1809	0.0010013458746476	0.0434565036342305
GO:0009628	BP	response to abiotic stimulus	1094	828	6.4871658492721e-08	8.69432862998915e-06
GO:0009653	BP	anatomical structure morphogenesis	2673	2012	1.81492986378719e-11	7.12954517526332e-09
GO:0009719	BP	response to endogenous stimulus	1567	1149	2.76310856578363e-05	0.00217836213020119
GO:0009725	BP	response to hormone	831	619	0.000200238569695372	0.0116980399280496
GO:0009790	BP	embryo development	1096	851	7.35924785882923e-09	1.13292637307814e-06
GO:0009792	BP	embryo development ending in birth or egg hatching	657	523	1.53236772090489e-08	2.28192589235928e-06
GO:0009887	BP	animal organ morphogenesis	1025	785	7.41330004907977e-06	0.00065721645260013
GO:0009888	BP	tissue development	1906	1393	3.53435210164061e-05	0.00269319994260133
GO:0009889	BP	regulation of biosynthetic process	3903	2795	5.47916215692498e-10	1.13488391439435e-07
GO:0009890	BP	negative regulation of biosynthetic process	1558	1128	5.63996747032269e-05	0.00395387750288714
GO:0009891	BP	positive regulation of biosynthetic process	1966	1484	1.68620393237412e-11	6.74008252547577e-09
GO:0009893	BP	positive regulation of metabolic process	3670	2677	2.51136271992258e-11	8.9404512829244e-09
GO:0009966	BP	regulation of signal transduction	2913	2121	4.27433191368503e-08	5.97462443689568e-06
GO:0009967	BP	positive regulation of signal transduction	1497	1092	7.89812814339606e-05	0.00530539607728665
GO:0009968	BP	negative regulation of signal transduction	1255	906	0.0010527256712172	0.0452552862132315
GO:0009987	BP	cellular process	15712	10623	1.2329455056017e-06	0.000132506747168062
GO:0010008	CC	endosome membrane	503	382	0.000571895815051964	0.0276060895130168
GO:0010033	BP	response to organic substance	2958	2095	2.22090995978905e-05	0.00179436923843382
GO:0010171	BP	body morphogenesis	45	43	8.52301406409074e-05	0.00569467309197195
GO:0010232	BP	vascular transport	84	74	0.000320042993111689	0.0173615703691827
GO:0010243	BP	response to organonitrogen compound	1003	753	4.36576800711566e-06	0.000416191038803863
GO:0010556	BP	regulation of macromolecule biosynthetic process	3682	2643	8.11369469086596e-10	1.60749930292774e-07
GO:0010557	BP	positive regulation of macromolecule biosynthetic process	1822	1381	5.35045227432266e-11	1.62539606157557e-08
GO:0010558	BP	negative regulation of macromolecule biosynthetic process	1467	1074	5.53814197719635e-06	0.000512931003286348
GO:0010604	BP	positive regulation of macromolecule metabolic process	3365	2462	4.43753922442998e-11	1.38499854369059e-08
GO:0010646	BP	regulation of cell communication	3287	2413	2.79250348666248e-10	6.17712615923474e-08
GO:0010647	BP	positive regulation of cell communication	1684	1234	7.19316587478379e-06	0.000642702318788525
GO:0010648	BP	negative regulation of cell communication	1357	981	0.000720651185555225	0.0332374830196159
GO:0010720	BP	positive regulation of cell development	293	236	0.000212985003844668	0.0122510856145258
GO:0010761	BP	fibroblast migration	53	49	0.000244051936759439	0.0137295785854989
GO:0010941	BP	regulation of cell death	1585	1131	0.000478766412796752	0.0240269029717207
GO:0010975	BP	regulation of neuron projection development	424	347	1.41286671742423e-06	0.000150424090139223
GO:0012501	BP	programmed cell death	1879	1349	7.00560975637418e-05	0.00482222999061116
GO:0012505	CC	endomembrane system	4447	3184	6.24620770710904e-09	9.81473078612223e-07
GO:0012506	CC	vesicle membrane	1145	856	1.71394453224412e-05	0.00143568059642096
GO:0014069	CC	postsynaptic density	307	255	2.64807461173928e-06	0.000266963415725078
GO:0014070	BP	response to organic cyclic compound	887	649	0.00108603209959179	0.0461644689498122
GO:0014074	BP	response to purine-containing compound	135	111	0.000991196855361398	0.0430981472376987
GO:0015031	BP	protein transport	1486	1088	2.60925312372675e-05	0.00206420913788161
GO:0015075	MF	ion transmembrane transporter activity	806	602	0.000459666815144698	0.0232734415916818
GO:0015629	CC	actin cytoskeleton	486	390	6.0914517589075e-07	6.90485755596758e-05
GO:0015630	CC	microtubule cytoskeleton	1299	965	1.30906245070898e-05	0.00113405623106286
GO:0015631	MF	tubulin binding	352	276	0.000249955356396053	0.0139925868307805
GO:0016020	CC	membrane	8664	6023	1.45706772177169e-10	3.53252023749022e-08
GO:0016043	BP	cellular component organization	5932	4371	8.17765352032589e-21	9.31598289035525e-17
GO:0016049	BP	cell growth	470	364	0.000376648276647702	0.0199571031049796
GO:0016055	BP	Wnt signaling pathway	435	344	4.10170185361117e-05	0.00304407736262791
GO:0016192	BP	vesicle-mediated transport	1470	1101	3.43921940416e-07	4.14598809017891e-05
GO:0016301	MF	kinase activity	690	559	9.23739507623148e-10	1.78360007980388e-07
GO:0016310	BP	phosphorylation	1750	1314	5.33442239025688e-09	8.55911829152203e-07
GO:0016358	BP	dendrite development	223	194	9.07442005254891e-08	1.17472492316633e-05
GO:0016477	BP	cell migration	1509	1105	1.32658764297579e-05	0.00114488533551366
GO:0016740	MF	transferase activity	2089	1555	5.76619528994534e-10	1.17300887041174e-07
GO:0016772	MF	transferase activity, transferring phosphorus-containing groups	827	655	3.61373618974155e-09	5.96633082225156e-07
GO:0016773	MF	phosphotransferase activity, alcohol group as acceptor	641	523	9.87116557881226e-10	1.8587160045261e-07
GO:0017076	MF	purine nucleotide binding	1796	1371	2.31671225041425e-11	8.4335422457047e-09
GO:0018108	BP	peptidyl-tyrosine phosphorylation	365	287	8.56650222233145e-05	0.00570699376121637
GO:0018130	BP	heterocycle biosynthetic process	3754	2716	4.76103567766162e-11	1.46588428216003e-08
GO:0018193	BP	peptidyl-amino acid modification	1215	903	1.92783069068615e-05	0.00158569294067124
GO:0018212	BP	peptidyl-tyrosine modification	367	289	7.06534222464837e-05	0.00484404930954431
GO:0019082	BP	viral protein processing	31	30	0.000383441025907946	0.0201297703554992
GO:0019219	BP	regulation of nucleobase-containing compound metabolic process	3749	2713	8.59910923183148e-11	2.33240600878629e-08
GO:0019220	BP	regulation of phosphate metabolic process	1342	985	4.9915687487423e-05	0.0035651380053713
GO:0019222	BP	regulation of metabolic process	6703	4555	0.000603614178383529	0.0287714339755028
GO:0019438	BP	aromatic compound biosynthetic process	3767	2723	7.09861332558285e-11	1.99596073253332e-08
GO:0019538	BP	protein metabolic process	5145	3645	2.10629569569857e-09	3.66334665120582e-07
GO:0019838	MF	growth factor binding	127	107	0.000608961030029311	0.0289656954241917
GO:0019898	CC	extrinsic component of membrane	301	243	2.01949838582851e-05	0.0016432946865256
GO:0019899	MF	enzyme binding	1977	1498	4.10837947349589e-11	1.31838475949479e-08
GO:0019900	MF	kinase binding	738	574	8.92406337033517e-07	9.72851003969936e-05
GO:0019901	MF	protein kinase binding	659	513	5.67062359542075e-06	0.000523074850194601
GO:0019904	MF	protein domain specific binding	653	527	6.74569820830728e-10	1.34819287700064e-07
GO:0022008	BP	neurogenesis	1606	1281	5.99396911404171e-17	1.05051224841789e-13
GO:0022402	BP	cell cycle process	1201	888	5.93173070974937e-06	0.000544953840689232
GO:0022603	BP	regulation of anatomical structure morphogenesis	938	708	4.45743036509635e-05	0.00326553355107252
GO:0022604	BP	regulation of cell morphogenesis	296	237	0.000681569255359447	0.0317224041576425
GO:0022607	BP	cellular component assembly	2796	2032	3.82867615078033e-08	5.41817126828442e-06
GO:0022857	MF	transmembrane transporter activity	1049	769	0.000496679482381378	0.0247081775689461
GO:0023051	BP	regulation of signaling	3299	2425	1.27782886187564e-10	3.19934646032687e-08
GO:0023052	BP	signaling	6053	4208	4.25726356940692e-06	0.000407552492291459
GO:0023056	BP	positive regulation of signaling	1688	1237	7.08669199836353e-06	0.000638558036827063
GO:0023057	BP	negative regulation of signaling	1363	987	0.000497877224090417	0.024713801031974
GO:0030001	BP	metal ion transport	867	642	0.000574954023355026	0.0276950369304882
GO:0030029	BP	actin filament-based process	781	627	5.62330856540117e-10	1.1542474085955e-07
GO:0030030	BP	cell projection organization	1478	1144	1.52052740817635e-09	2.72785011558189e-07
GO:0030036	BP	actin cytoskeleton organization	695	561	1.53414038998212e-09	2.73076989416818e-07
GO:0030054	CC	cell junction	2007	1580	3.56458224354334e-17	8.12154418368915e-14
GO:0030055	CC	cell-substrate junction	416	343	3.03090106642125e-08	4.34314779228565e-06
GO:0030097	BP	hemopoiesis	881	653	3.24507058503779e-05	0.00249337352238656
GO:0030111	BP	regulation of Wnt signaling pathway	322	254	0.000533443323281595	0.0261375756508556
GO:0030154	BP	cell differentiation	4072	3030	1.9005194488343e-18	6.18591930317724e-15
GO:0030155	BP	regulation of cell adhesion	768	577	0.000119044918093139	0.00761887475796092
GO:0030177	BP	positive regulation of Wnt signaling pathway	136	117	4.77286571414179e-05	0.00344129659591793
GO:0030182	BP	neuron differentiation	1322	1062	2.72218817513909e-15	3.4456852990205e-12
GO:0030234	MF	enzyme regulator activity	1171	875	3.26079950218192e-07	3.95181148179324e-05
GO:0030424	CC	axon	617	485	3.19890002524609e-05	0.00247903871344241
GO:0030425	CC	dendrite	589	481	2.24960214165007e-09	3.85375452596656e-07
GO:0030534	BP	adult behavior	139	115	0.000896850853427625	0.039676783935132
GO:0030554	MF	adenyl nucleotide binding	1475	1161	4.62874730683192e-14	4.79369902903902e-11
GO:0030641	BP	regulation of cellular pH	82	70	0.000674806856121834	0.0315057364956555
GO:0030659	CC	cytoplasmic vesicle membrane	1128	842	2.53617677422052e-05	0.00202751760083651
GO:0030674	MF	protein-macromolecule adaptor activity	329	256	0.000940631249580023	0.0412141199815985
GO:0030695	MF	GTPase regulator activity	447	364	3.11291611695946e-07	3.79276367961521e-05
GO:0031032	BP	actomyosin structure organization	200	165	0.000115191424085549	0.00741390227786767
GO:0031090	CC	organelle membrane	3457	2507	3.06832934709427e-11	1.04341516185367e-08
GO:0031098	BP	stress-activated protein kinase signaling cascade	232	187	0.000124457293523205	0.00786648182529035
GO:0031175	BP	neuron projection development	920	736	1.09130218029851e-09	2.02148202243262e-07
GO:0031252	CC	cell leading edge	405	330	3.82315658184354e-06	0.000370667232173291
GO:0031323	BP	regulation of cellular metabolic process	5308	3804	1.56857890263526e-12	9.9273615882338e-10
GO:0031324	BP	negative regulation of cellular metabolic process	2172	1577	6.75898197316362e-07	7.51203147690536e-05
GO:0031325	BP	positive regulation of cellular metabolic process	2958	2199	1.04040614398929e-12	6.97194517195644e-10
GO:0031326	BP	regulation of cellular biosynthetic process	3841	2753	3.52717087576444e-10	7.58142087107707e-08
GO:0031327	BP	negative regulation of cellular biosynthetic process	1532	1110	5.11640295103399e-05	0.0036428789011362
GO:0031328	BP	positive regulation of cellular biosynthetic process	1926	1459	5.74499744787118e-12	2.90875604116216e-09
GO:0031344	BP	regulation of cell projection organization	628	503	2.35679279159905e-07	2.96669430739186e-05
GO:0031346	BP	positive regulation of cell projection organization	333	264	0.00081009451460671	0.0366214155174589
GO:0031399	BP	regulation of protein modification process	1492	1080	0.000654898431800757	0.0308927657767049
GO:0031410	CC	cytoplasmic vesicle	2351	1695	1.72356760409703e-05	0.00143845290445959
GO:0031532	BP	actin cytoskeleton reorganization	108	92	0.000845690666652433	0.037855041550116
GO:0031589	BP	cell-substrate adhesion	355	286	4.01573800855118e-05	0.00299001878388334
GO:0031981	CC	nuclear lumen	4582	3153	0.000190303434406301	0.0112031046137977
GO:0031982	CC	vesicle	3870	2708	2.94542444321401e-05	0.00229823803130781
GO:0031984	CC	organelle subcompartment	1389	1020	1.76692366191958e-06	0.000184667838133834
GO:0032092	BP	positive regulation of protein binding	84	72	0.0008216286816528	0.0369230530232296
GO:0032279	CC	asymmetric synapse	312	259	2.5904462865208e-06	0.0002623143475204
GO:0032501	BP	multicellular organismal process	7160	4957	8.91722983989754e-08	1.16097236955557e-05
GO:0032502	BP	developmental process	6150	4488	9.54103189479181e-19	3.62304784484894e-15
GO:0032535	BP	regulation of cellular component size	347	275	0.000348449090962459	0.0187242077558695
GO:0032553	MF	ribonucleotide binding	1800	1376	1.13718908365211e-11	5.08033648665286e-09
GO:0032555	MF	purine ribonucleotide binding	1783	1363	1.66758414408414e-11	6.74008252547577e-09
GO:0032559	MF	adenyl ribonucleotide binding	1463	1153	3.80342960577899e-14	4.12654000657469e-11
GO:0032774	BP	RNA biosynthetic process	3282	2379	4.05845001358506e-10	8.64184346817963e-08
GO:0032868	BP	response to insulin	262	205	0.000672214675071821	0.0314491563795408
GO:0032870	BP	cellular response to hormone stimulus	574	439	7.16938352148359e-05	0.00489063575309827
GO:0032872	BP	regulation of stress-activated MAPK cascade	185	151	0.000140339962245396	0.00866532709972659
GO:0032879	BP	regulation of localization	2042	1507	2.52010185064535e-08	3.68064106186562e-06
GO:0032880	BP	regulation of protein localization	810	610	8.73593151829702e-05	0.00580289981670202
GO:0032922	BP	circadian regulation of gene expression	67	60	0.000190783207081878	0.0112031046137977
GO:0032940	BP	secretion by cell	777	585	5.18666220495613e-05	0.00368139911768599
GO:0032970	BP	regulation of actin filament-based process	386	299	0.00112785102132335	0.0475869586478356
GO:0032989	BP	cellular component morphogenesis	736	606	2.33195734497628e-11	8.4335422457047e-09
GO:0032990	BP	cell part morphogenesis	634	529	2.67721146984073e-11	9.24715609054341e-09
GO:0032991	CC	protein-containing complex	5444	3754	1.04805693733821e-05	0.000911409513752432
GO:0033036	BP	macromolecule localization	2803	2051	6.01830735514543e-09	9.52229963747454e-07
GO:0033043	BP	regulation of organelle organization	1136	842	0.000133188902422662	0.00826859932642491
GO:0033365	BP	protein localization to organelle	876	641	0.00084213859624562	0.0377702475922445
GO:0033554	BP	cellular response to stress	1874	1409	6.89836948842976e-12	3.27442605050799e-09
GO:0034220	BP	ion transmembrane transport	1091	810	7.30956594565283e-05	0.00495145669689338
GO:0034329	BP	cell junction assembly	405	316	0.00111956489902757	0.0473249845258702
GO:0034330	BP	cell junction organization	663	523	3.19174915747911e-06	0.000316177446973931
GO:0034641	BP	cellular nitrogen compound metabolic process	6407	4326	0.000524190061744117	0.0258509661618571
GO:0034654	BP	nucleobase-containing compound biosynthetic process	3687	2668	7.8143725365884e-11	2.14509233582687e-08
GO:0035556	BP	intracellular signal transduction	2532	1877	4.41476049746199e-10	9.2280645113921e-08
GO:0035639	MF	purine ribonucleoside triphosphate binding	1715	1310	7.07573368723511e-11	1.99596073253332e-08
GO:0036094	MF	small molecule binding	2358	1759	1.88057240769338e-10	4.4424713040307e-08
GO:0036211	BP	protein modification process	3406	2497	1.09061237716811e-10	2.79196768555037e-08
GO:0036477	CC	somatodendritic compartment	807	638	2.76591827096304e-08	4.01392878252369e-06
GO:0038127	BP	ERBB signaling pathway	123	104	0.000178601636913631	0.010624698943708
GO:0040007	BP	growth	878	661	0.000119400996278134	0.00762025854117926
GO:0040011	BP	locomotion	1367	994	6.09989417672278e-05	0.0042243157727189
GO:0040012	BP	regulation of locomotion	1069	776	0.000463225672523824	0.0234016268797845
GO:0042058	BP	regulation of epidermal growth factor receptor signaling pathway	72	62	0.00049980298205929	0.024755459007041
GO:0042127	BP	regulation of cell population proliferation	1667	1182	0.000686903515638108	0.0318745615077366
GO:0042175	CC	nuclear outer membrane-endoplasmic reticulum membrane network	1119	815	4.18882397770745e-05	0.00308861377048824
GO:0042325	BP	regulation of phosphorylation	1194	870	0.000766104522898738	0.0351205743455228
GO:0042383	CC	sarcolemma	133	117	6.69434884880937e-06	0.00061009617668509
GO:0042641	CC	actomyosin	77	68	0.000873840326901283	0.0389091705751711
GO:0042802	MF	identical protein binding	1899	1364	0.000111916426609669	0.00722352369369603
GO:0042995	CC	cell projection	2269	1727	3.21111697475098e-12	1.87595100391606e-09
GO:0043005	CC	neuron projection	1307	1029	6.87585448554123e-12	3.27442605050799e-09
GO:0043009	BP	chordate embryonic development	637	506	4.65566518323221e-08	6.42876821422804e-06
GO:0043010	BP	camera-type eye development	334	264	0.000249529096696518	0.0139925868307805
GO:0043085	BP	positive regulation of catalytic activity	1117	828	9.6669378748643e-05	0.00636565065147133
GO:0043087	BP	regulation of GTPase activity	342	269	0.000592874421176122	0.0283187648051924
GO:0043167	MF	ion binding	5657	4111	1.04472617266819e-16	1.70021722271943e-13
GO:0043168	MF	anion binding	2254	1698	1.60764026297749e-11	6.65972286394167e-09
GO:0043169	MF	cation binding	4076	2939	7.18349631617505e-11	1.99596073253332e-08
GO:0043197	CC	dendritic spine	167	145	8.71817665295251e-06	0.000765489563925493
GO:0043226	CC	organelle	13507	9269	4.0793330545495e-11	1.31838475949479e-08
GO:0043227	CC	membrane-bounded organelle	12731	8719	8.70469669578435e-10	1.70972249583406e-07
GO:0043229	CC	intracellular organelle	12665	8733	5.05712715912211e-12	2.67957174868461e-09
GO:0043231	CC	intracellular membrane-bounded organelle	11628	8012	3.69352870988669e-11	1.2196138858849e-08
GO:0043235	CC	receptor complex	386	306	7.32373993527505e-05	0.00495145669689338
GO:0043269	BP	regulation of ion transport	684	512	0.000220452443534212	0.0125884422894323
GO:0043412	BP	macromolecule modification	3622	2646	4.3981018541979e-11	1.38499854369059e-08
GO:0043549	BP	regulation of kinase activity	742	555	0.000804886425697021	0.0364583147576162
GO:0043933	BP	protein-containing complex organization	1695	1207	0.000466364707881902	0.0235080829742948
GO:0044085	BP	cellular component biogenesis	3047	2197	7.7045664940163e-08	1.0146869537553e-05
GO:0044087	BP	regulation of cellular component biogenesis	911	701	4.84515722464792e-07	5.57535667708981e-05
GO:0044089	BP	positive regulation of cellular component biogenesis	477	367	0.000879489351879215	0.0389849910373853
GO:0044093	BP	positive regulation of molecular function	1492	1116	7.4347793094257e-08	9.90608256058217e-06
GO:0044237	BP	cellular metabolic process	9432	6481	1.01397464135334e-09	1.89363919906512e-07
GO:0044238	BP	primary metabolic process	9929	6790	7.53821613948592e-09	1.15268937263119e-06
GO:0044249	BP	cellular biosynthetic process	5373	3835	3.79497105341121e-13	2.98153863727314e-10
GO:0044260	BP	cellular macromolecule metabolic process	3076	2166	3.33280295932903e-05	0.00254814035655545
GO:0044271	BP	cellular nitrogen compound biosynthetic process	4475	3189	1.5381585142097e-10	3.68898985134251e-08
GO:0044281	BP	small molecule metabolic process	1750	1231	0.000697155972170672	0.0322845562397085
GO:0044309	CC	neuron spine	168	146	7.09072960486513e-06	0.000638558036827063
GO:0044877	MF	protein-containing complex binding	1242	927	8.0750939577392e-06	0.000713112173384224
GO:0045017	BP	glycerolipid biosynthetic process	237	187	0.000989811895711535	0.0430981472376987
GO:0045177	CC	apical part of cell	415	319	0.000527682184568135	0.0259669781710591
GO:0045184	BP	establishment of protein localization	1590	1163	2.84055211948215e-05	0.00222402541203716
GO:0045202	CC	synapse	1268	993	6.68936213760635e-10	1.34819287700064e-07
GO:0045211	CC	postsynaptic membrane	251	205	0.000197652879492781	0.0115766663402661
GO:0045296	MF	cadherin binding	328	268	2.37977860083852e-06	0.000242057480542432
GO:0045595	BP	regulation of cell differentiation	1562	1171	9.17348814011611e-09	1.37505759068688e-06
GO:0045597	BP	positive regulation of cell differentiation	877	656	0.000155965345103438	0.00945083623094877
GO:0045664	BP	regulation of neuron differentiation	191	157	0.000264415077262598	0.0146937393179294
GO:0045892	BP	negative regulation of DNA-templated transcription	1181	897	8.41877674692401e-08	1.10237591610297e-05
GO:0045893	BP	positive regulation of DNA-templated transcription	1613	1229	1.99570604214084e-10	4.59294610748857e-08
GO:0045934	BP	negative regulation of nucleobase-containing compound metabolic process	1410	1053	1.03157574138033e-06	0.00011192105567433
GO:0045935	BP	positive regulation of nucleobase-containing compound metabolic process	1954	1478	2.00145311938817e-11	7.4755914544492e-09
GO:0045944	BP	positive regulation of transcription by RNA polymerase II	1188	917	8.96045354481475e-10	1.74491430397487e-07
GO:0046328	BP	regulation of JNK cascade	135	112	0.000534814875902315	0.0261485453488376
GO:0046474	BP	glycerophospholipid biosynthetic process	201	163	0.000278829284512134	0.0153821947174926
GO:0046483	BP	heterocycle metabolic process	5746	3894	0.000725445850532361	0.0333910267849077
GO:0046486	BP	glycerolipid metabolic process	378	288	0.000795668827467708	0.0362975672642782
GO:0046777	BP	protein autophosphorylation	214	176	0.000482817285310806	0.0241769429198273
GO:0046872	MF	metal ion binding	3992	2882	5.76382875038921e-11	1.7279351874851e-08
GO:0046903	BP	secretion	906	671	0.000203747119709703	0.0118474567196753
GO:0046907	BP	intracellular transport	1495	1083	0.000817029214650394	0.0367889202106612
GO:0046914	MF	transition metal ion binding	1024	744	6.56352513352723e-05	0.00453161686794801
GO:0048167	BP	regulation of synaptic plasticity	198	161	0.000267215347597146	0.014813222578232
GO:0048468	BP	cell development	2069	1596	8.34840043116311e-14	7.86032484856871e-11
GO:0048511	BP	rhythmic process	293	234	5.70417115291811e-05	0.00398662072233393
GO:0048513	BP	animal organ development	3416	2497	1.1021513309034e-09	2.02511418736314e-07
GO:0048518	BP	positive regulation of biological process	5979	4293	5.35005892862967e-13	3.93212072999672e-10
GO:0048519	BP	negative regulation of biological process	5476	3744	0.000984729247425291	0.0429809792592679
GO:0048522	BP	positive regulation of cellular process	5349	3893	2.16359379309425e-15	2.89972476363879e-12
GO:0048523	BP	negative regulation of cellular process	4616	3327	1.86172697130094e-11	7.18942157866449e-09
GO:0048534	BP	hematopoietic or lymphoid organ development	923	689	5.19073010005839e-06	0.000484695059834961
GO:0048583	BP	regulation of response to stimulus	3839	2738	6.44220947424299e-07	7.23050742173164e-05
GO:0048584	BP	positive regulation of response to stimulus	2098	1494	0.000163228215342583	0.00978682015359318
GO:0048589	BP	developmental growth	622	473	0.00054536632961934	0.0265504838761689
GO:0048592	BP	eye morphogenesis	157	131	0.000283506813483467	0.0156024619285201
GO:0048593	BP	camera-type eye morphogenesis	127	107	0.000584825118493367	0.0280519063152692
GO:0048646	BP	anatomical structure formation involved in morphogenesis	1202	886	9.99538619700168e-05	0.0065253547023635
GO:0048666	BP	neuron development	1061	853	3.37877353672741e-12	1.92454940651993e-09
GO:0048667	BP	cell morphogenesis involved in neuron differentiation	536	454	9.77633472193464e-12	4.45488020609118e-09
GO:0048699	BP	generation of neurons	1391	1119	2.13321349517911e-16	3.24020908494405e-13
GO:0048731	BP	system development	4232	3144	2.4830799114153e-16	3.53590579385539e-13
GO:0048786	CC	presynaptic active zone	72	65	0.000224503131252995	0.0127876983561706
GO:0048812	BP	neuron projection morphogenesis	595	500	1.22660402801334e-11	5.27300871212375e-09
GO:0048813	BP	dendrite morphogenesis	130	119	2.93417445262697e-07	3.6136340934407e-05
GO:0048856	BP	anatomical structure development	5630	4118	4.1425553789735e-17	8.32667472490216e-14
GO:0048858	BP	cell projection morphogenesis	616	516	1.94707620921536e-11	7.39369739179379e-09
GO:0048869	BP	cellular developmental process	4098	3045	5.66773931185974e-18	1.43481969423791e-14
GO:0048870	BP	cell motility	1696	1231	3.05561344028444e-05	0.00237607838305259
GO:0048871	BP	multicellular organismal homeostasis	519	393	0.000448171513025316	0.0227927226624304
GO:0048880	BP	sensory system development	389	307	0.000106135363928058	0.00686985264697978
GO:0050767	BP	regulation of neurogenesis	361	294	7.38865552646048e-06	0.00065721645260013
GO:0050769	BP	positive regulation of neurogenesis	218	178	0.000624464049876084	0.0295796027284339
GO:0050770	BP	regulation of axonogenesis	145	126	9.88789668763392e-05	0.00647373098077733
GO:0050789	BP	regulation of biological process	11209	7623	5.62917068037774e-07	6.41275123908632e-05
GO:0050790	BP	regulation of catalytic activity	2241	1648	3.13125801457593e-09	5.24577813265426e-07
GO:0050793	BP	regulation of developmental process	2456	1831	3.56202654395718e-11	1.19348842319883e-08
GO:0050794	BP	regulation of cellular process	10343	7206	6.30956043753946e-14	6.25030543516952e-11
GO:0050803	BP	regulation of synapse structure or activity	200	164	0.000397679642807474	0.020781497664508
GO:0050804	BP	modulation of chemical synaptic transmission	430	339	0.000141819987717117	0.00870950566077303
GO:0050807	BP	regulation of synapse organization	194	159	0.000484765085287721	0.0242212449631479
GO:0050808	BP	synapse organization	399	319	4.28200084631786e-05	0.00314713249298407
GO:0050839	MF	cell adhesion molecule binding	544	439	9.43876161237713e-08	1.20816148638427e-05
GO:0050890	BP	cognition	301	247	1.92685395793386e-06	0.000198649052387172
GO:0050896	BP	response to stimulus	8320	5710	1.77701585413145e-06	0.000184874562650827
GO:0051015	MF	actin filament binding	210	174	0.000158186649524545	0.00956001226198204
GO:0051017	BP	actin filament bundle assembly	154	129	0.000431621773335646	0.0222994795548285
GO:0051049	BP	regulation of transport	1714	1261	7.85321903206553e-07	8.60229530897024e-05
GO:0051050	BP	positive regulation of transport	866	641	0.000342341112964375	0.0184831751606169
GO:0051056	BP	regulation of small GTPase mediated signal transduction	285	231	0.00045953763779922	0.0232734415916818
GO:0051094	BP	positive regulation of developmental process	1324	982	1.62813447797246e-05	0.0013739042943009
GO:0051128	BP	regulation of cellular component organization	2262	1717	2.21161363121294e-12	1.3618758100961e-09
GO:0051129	BP	negative regulation of cellular component organization	672	512	5.9086758298946e-05	0.00410436799110727
GO:0051130	BP	positive regulation of cellular component organization	1006	762	1.7961360072819e-05	0.00148811501054222
GO:0051171	BP	regulation of nitrogen compound metabolic process	5360	3812	8.78224768626233e-11	2.35405566216236e-08
GO:0051172	BP	negative regulation of nitrogen compound metabolic process	2307	1657	4.03202867508905e-06	0.000387619161743582
GO:0051173	BP	positive regulation of nitrogen compound metabolic process	2994	2218	4.65307179592022e-12	2.52418066186301e-09
GO:0051174	BP	regulation of phosphorus metabolic process	1343	986	4.74834103946758e-05	0.00344129659591793
GO:0051179	BP	localization	5025	3655	8.62482975834874e-14	7.86032484856871e-11
GO:0051234	BP	establishment of localization	4423	3213	3.56047871896674e-12	1.97858407641313e-09
GO:0051239	BP	regulation of multicellular organismal process	2780	1965	0.000241489426446837	0.0136190472578335
GO:0051240	BP	positive regulation of multicellular organismal process	1493	1072	0.00100940734587802	0.0437230740845717
GO:0051246	BP	regulation of protein metabolic process	2519	1775	0.0003828100226727	0.0201297703554992
GO:0051247	BP	positive regulation of protein metabolic process	1424	1034	0.000254843903978525	0.0141964877952243
GO:0051252	BP	regulation of RNA metabolic process	3445	2499	2.2979030649723e-10	5.1837052903296e-08
GO:0051253	BP	negative regulation of RNA metabolic process	1287	966	1.99468753935543e-06	0.000204716040075108
GO:0051254	BP	positive regulation of RNA metabolic process	1758	1334	8.99173268356253e-11	2.38218183095685e-08
GO:0051301	BP	cell division	612	461	0.000228112711977616	0.0129608978296708
GO:0051403	BP	stress-activated MAPK cascade	225	181	0.000184744760770308	0.0109615224723716
GO:0051452	BP	intracellular pH reduction	47	42	0.000872894362355707	0.0389091705751711
GO:0051493	BP	regulation of cytoskeleton organization	513	394	0.000370738979762217	0.019825630079019
GO:0051640	BP	organelle localization	550	418	0.000660139475167298	0.0310756566161399
GO:0051641	BP	cellular localization	3171	2333	4.31305414292112e-10	9.09894681410323e-08
GO:0051649	BP	establishment of localization in cell	1992	1469	2.84757149495999e-07	3.52603635549828e-05
GO:0051668	BP	localization within membrane	637	483	0.000486815615489335	0.0242704747993632
GO:0051716	BP	cellular response to stimulus	7020	4871	1.81426630534553e-08	2.66685441941888e-06
GO:0051960	BP	regulation of nervous system development	436	350	6.82835887018789e-06	0.000619829994017374
GO:0051962	BP	positive regulation of nervous system development	262	212	0.000347831944853524	0.0187242077558695
GO:0055085	BP	transmembrane transport	1482	1077	9.6957467737702e-05	0.00636622174333084
GO:0060041	BP	retina development in camera-type eye	156	131	0.000186626947824638	0.011015824816675
GO:0060070	BP	canonical Wnt signaling pathway	297	233	0.000799805387298068	0.0363727863157668
GO:0060079	BP	excitatory postsynaptic potential	116	97	0.00104383227159552	0.0449577967410821
GO:0060090	MF	molecular adaptor activity	461	362	1.61210607843302e-05	0.0013705307795156
GO:0060249	BP	anatomical structure homeostasis	315	244	0.000360957998972519	0.0193507459966821
GO:0060255	BP	regulation of macromolecule metabolic process	6199	4204	0.0010696310176895	0.0457232140844981
GO:0060284	BP	regulation of cell development	497	400	3.86694975035659e-07	4.55418550609855e-05
GO:0060322	BP	head development	766	608	2.99996450577852e-08	4.32602476580113e-06
GO:0060341	BP	regulation of cellular localization	921	688	0.000131479432862012	0.00819313664225906
GO:0060429	BP	epithelium development	1158	851	0.000299609493460561	0.0164489221662781
GO:0060538	BP	skeletal muscle organ development	168	141	4.71858062881754e-05	0.00344129659591793
GO:0060560	BP	developmental growth involved in morphogenesis	219	184	3.2366696454706e-05	0.00249337352238656
GO:0060589	MF	nucleoside-triphosphatase regulator activity	447	364	3.11291611695946e-07	3.79276367961521e-05
GO:0060997	BP	dendritic spine morphogenesis	53	50	0.000148972725484905	0.00905118553986154
GO:0061024	BP	membrane organization	773	573	0.000701329189272058	0.0324119355950802
GO:0061061	BP	muscle structure development	669	506	0.000173035552304855	0.0103476168601413
GO:0061097	BP	regulation of protein tyrosine kinase activity	89	77	0.000377828922607519	0.0199732115375631
GO:0061098	BP	positive regulation of protein tyrosine kinase activity	53	48	0.000580989531996682	0.0279267204578321
GO:0061351	BP	neural precursor cell proliferation	146	122	0.000387763411401352	0.0203098886560193
GO:0061564	BP	axon development	463	382	7.48652206547358e-08	9.9170301592878e-06
GO:0061572	BP	actin filament bundle organization	157	131	0.00056922458576163	0.0276051485061546
GO:0061629	MF	RNA polymerase II-specific DNA-binding transcription factor binding	337	264	0.000802708381213262	0.0364320871664601
GO:0062197	BP	cellular response to chemical stress	331	255	0.000310111700686295	0.0169285470700599
GO:0065007	BP	biological regulation	11891	8097	1.60106443216151e-08	2.36874363781609e-06
GO:0065008	BP	regulation of biological quality	3565	2587	1.4946165589176e-09	2.70264632368085e-07
GO:0065009	BP	regulation of molecular function	2941	2150	1.32456417620252e-10	3.28031197723894e-08
GO:0070161	CC	anchoring junction	1266	1019	4.46701232511566e-15	5.35665309554922e-12
GO:0070302	BP	regulation of stress-activated protein kinase signaling cascade	188	153	0.000185706999892533	0.0109899955468869
GO:0070727	BP	cellular macromolecule localization	2353	1745	1.88471808317317e-09	3.30318590823211e-07
GO:0070887	BP	cellular response to chemical stimulus	2960	2093	1.62529609620924e-05	0.0013739042943009
GO:0071214	BP	cellular response to abiotic stimulus	318	251	4.76256540706128e-05	0.00344129659591793
GO:0071310	BP	cellular response to organic substance	2346	1672	3.98953731758479e-05	0.00298024977848694
GO:0071375	BP	cellular response to peptide hormone stimulus	296	233	0.000206660097354373	0.0119506184216295
GO:0071417	BP	cellular response to organonitrogen compound	623	477	1.34845060994642e-05	0.00115936221498186
GO:0071495	BP	cellular response to endogenous stimulus	1325	986	6.49859987792485e-06	0.000594634938227469
GO:0071702	BP	organic substance transport	2346	1682	3.7966283943438e-05	0.00284547307028714
GO:0071705	BP	nitrogen compound transport	1913	1402	3.47620378054184e-07	4.15019169922718e-05
GO:0071840	BP	cellular component organization or biogenesis	6130	4499	2.4207553165389e-20	1.83848297106741e-16
GO:0071889	MF	14-3-3 protein binding	31	30	0.000928465572482963	0.0408381459526097
GO:0071944	CC	cell periphery	5641	3927	5.17880046520522e-06	0.000484695059834961
GO:0072359	BP	circulatory system development	1164	848	0.0008985788496545	0.039676783935132
GO:0072659	BP	protein localization to plasma membrane	274	220	0.000310574643402609	0.0169285470700599
GO:0080090	BP	regulation of primary metabolic process	5514	3919	6.559077490513e-11	1.91592335312626e-08
GO:0080134	BP	regulation of response to stress	1364	970	0.000414731167471669	0.0215244531199875
GO:0080135	BP	regulation of cellular response to stress	693	534	3.47913717763515e-07	4.15019169922718e-05
GO:0090066	BP	regulation of anatomical structure size	484	371	0.000960031096834974	0.0419833944535279
GO:0090407	BP	organophosphate biosynthetic process	568	426	0.000268144531045553	0.0148286529013153
GO:0090596	BP	sensory organ morphogenesis	267	213	0.000430109361689216	0.0222718447652888
GO:0097060	CC	synaptic membrane	355	292	1.71652214059799e-06	0.000180226914522509
GO:0097061	BP	dendritic spine organization	75	68	0.000143561713953771	0.00879276906108258
GO:0097159	MF	organic cyclic compound binding	5882	4102	8.43885598645873e-09	1.28180596530317e-06
GO:0097367	MF	carbohydrate derivative binding	2143	1595	3.37673114465714e-09	5.61572572261813e-07
GO:0097435	BP	supramolecular fiber organization	774	580	0.000570854246319901	0.0276060895130168
GO:0097447	CC	dendritic tree	591	481	5.17109694082959e-09	8.35590586523839e-07
GO:0097485	BP	neuron projection guidance	230	196	3.47495030905808e-06	0.000341264085524049
GO:0097659	BP	nucleic acid-templated transcription	3267	2372	1.89132600285717e-10	4.4424713040307e-08
GO:0097708	CC	intracellular vesicle	2354	1698	1.49080315478485e-05	0.00127640382264861
GO:0098588	CC	bounding membrane of organelle	2016	1512	6.78680019410404e-11	1.95734753952489e-08
GO:0098590	CC	plasma membrane region	1194	925	8.63652656170137e-09	1.30314318663446e-06
GO:0098655	BP	cation transmembrane transport	889	661	0.000203836158449469	0.0118474567196753
GO:0098727	BP	maintenance of cell number	174	141	0.000909418704320657	0.0400777480836399
GO:0098793	CC	presynapse	497	400	1.24732532259265e-06	0.000133422817605404
GO:0098794	CC	postsynapse	588	482	2.5494795530005e-09	4.3348762787734e-07
GO:0098796	CC	membrane protein complex	1125	836	3.02449826054888e-06	0.000300917765800636
GO:0098797	CC	plasma membrane protein complex	554	429	2.40271027619214e-05	0.00192758277932259
GO:0098827	CC	endoplasmic reticulum subcompartment	1100	804	2.01371734064736e-05	0.0016432946865256
GO:0098916	BP	anterograde trans-synaptic signaling	696	531	0.000160666765110465	0.00965865851260379
GO:0098978	CC	glutamatergic synapse	306	247	0.000399206332321632	0.0208135402188011
GO:0098984	CC	neuron to neuron synapse	335	279	7.74328248641672e-07	8.52284773770621e-05
GO:0099003	BP	vesicle-mediated transport in synapse	201	168	7.74952774456901e-05	0.00522382367255208
GO:0099173	BP	postsynapse organization	150	126	0.000321113059558039	0.0173782421590745
GO:0099175	BP	regulation of postsynapse organization	80	71	0.000205300426653403	0.011902200816466
GO:0099177	BP	regulation of trans-synaptic signaling	431	340	0.000126311826664236	0.00792806793035249
GO:0099504	BP	synaptic vesicle cycle	181	150	0.00043696979545384	0.022446765226969
GO:0099536	BP	synaptic signaling	723	555	4.18668697001618e-05	0.00308861377048824
GO:0099537	BP	trans-synaptic signaling	702	536	0.000145764199591338	0.00890373062597602
GO:0099572	CC	postsynaptic specialization	326	269	2.87549411679975e-06	0.000288613471176941
GO:0099643	BP	signal release from synapse	144	121	0.000437428184724993	0.022446765226969
GO:0104004	BP	cellular response to environmental stimulus	318	251	4.76256540706128e-05	0.00344129659591793
GO:0106310	MF	protein serine kinase activity	343	272	0.000874363383711709	0.0389091705751711
GO:0120025	CC	plasma membrane bounded cell projection	2161	1640	5.95951616426413e-11	1.76339761411161e-08
GO:0120035	BP	regulation of plasma membrane bounded cell projection organization	612	489	6.31001972119442e-07	7.11720244196503e-05
GO:0120036	BP	plasma membrane bounded cell projection organization	1440	1117	1.1520208681661e-09	2.09981147682371e-07
GO:0120039	BP	plasma membrane bounded cell projection morphogenesis	611	514	5.47557877778667e-12	2.83535424711572e-09
GO:0140096	MF	catalytic activity, acting on a protein	2103	1563	7.33563421234094e-09	1.13292637307814e-06
GO:0140110	MF	transcription regulator activity	1802	1295	5.35260903401727e-05	0.00376400753799535
GO:0140297	MF	DNA-binding transcription factor binding	450	356	1.90960313010373e-05	0.00157639122160447
GO:0140352	BP	export from cell	846	629	0.000176169815661148	0.0105074687958733
GO:0140513	CC	nuclear protein-containing complex	1172	869	4.04619664458531e-07	4.72761765898624e-05
GO:0140535	CC	intracellular protein-containing complex	838	615	0.000380022295665008	0.0200426573713693
GO:0150063	BP	visual system development	383	302	0.000124985359057018	0.00786648182529035
GO:0150104	BP	transport across blood-brain barrier	84	74	0.000320042993111689	0.0173615703691827
GO:0150115	BP	cell-substrate junction organization	99	86	0.00106743294066968	0.0457150227823645
GO:0198738	BP	cell-cell signaling by wnt	437	346	3.25022795009133e-05	0.00249337352238656
GO:1901184	BP	regulation of ERBB signaling pathway	78	67	0.000441406957156802	0.022549363479508
GO:1901265	MF	nucleoside phosphate binding	2030	1542	6.57486106468194e-12	3.25655727168942e-09
GO:1901360	BP	organic cyclic compound metabolic process	6031	4080	0.000747016097953903	0.0343145459189148
GO:1901362	BP	organic cyclic compound biosynthetic process	3914	2821	9.45944927968209e-11	2.44913741350314e-08
GO:1901363	MF	heterocyclic compound binding	5814	4058	6.94038508699096e-09	1.08308036864385e-06
GO:1901564	BP	organonitrogen compound metabolic process	6122	4324	1.26169587170196e-10	3.19405319342861e-08
GO:1901566	BP	organonitrogen compound biosynthetic process	1704	1188	0.00101945173038257	0.043990886789842
GO:1901576	BP	organic substance biosynthetic process	5437	3880	3.40181878774331e-13	2.76810854499799e-10
GO:1901652	BP	response to peptide	489	370	0.00037158247554855	0.019825630079019
GO:1901653	BP	cellular response to peptide	360	279	0.000232214027878109	0.0131611055004349
GO:1901698	BP	response to nitrogen compound	1083	800	3.64854602430129e-05	0.00277094908725602
GO:1901699	BP	cellular response to nitrogen compound	674	512	2.36269568703496e-05	0.00190217874676341
GO:1901700	BP	response to oxygen-containing compound	1620	1167	7.24809588251664e-05	0.0049295706443958
GO:1901701	BP	cellular response to oxygen-containing compound	1167	865	2.65736010668076e-07	3.30848593828494e-05
GO:1902494	CC	catalytic complex	1548	1121	4.97777943002739e-05	0.0035651380053713
GO:1902531	BP	regulation of intracellular signal transduction	1675	1234	1.66294158190175e-06	0.000175409541676155
GO:1902679	BP	negative regulation of RNA biosynthetic process	1184	898	1.14588225919269e-07	1.45853527337689e-05
GO:1902680	BP	positive regulation of RNA biosynthetic process	1619	1233	2.03787189791383e-10	4.64308733220687e-08
GO:1903047	BP	mitotic cell cycle process	759	571	2.83154814698078e-05	0.00222402541203716
GO:1903506	BP	regulation of nucleic acid-templated transcription	3158	2295	2.97808115392149e-10	6.52428855874493e-08
GO:1903507	BP	negative regulation of nucleic acid-templated transcription	1183	898	9.26870121097305e-08	1.19309654458085e-05
GO:1903508	BP	positive regulation of nucleic acid-templated transcription	1613	1229	1.99570604214084e-10	4.59294610748857e-08
GO:1903829	BP	positive regulation of protein localization	435	333	0.000773446318159491	0.035385945608325
GO:1905114	BP	cell surface receptor signaling pathway involved in cell-cell signaling	553	440	4.50748413376412e-07	5.23972033182049e-05
GO:1990138	BP	neuron projection extension	162	135	0.000933975028914425	0.0410013238126903
GO:1990778	BP	protein localization to cell periphery	322	257	0.000217626775503631	0.0124583126961676
GO:2000026	BP	regulation of multicellular organismal development	1405	1018	0.000376133135793212	0.0199571031049796
GO:2000145	BP	regulation of cell motility	1025	741	0.00108499943488494	0.0461644689498122
GO:2001141	BP	regulation of RNA biosynthetic process	3166	2300	3.26285110360121e-10	7.08007614709048e-08

## Sheet: female up
	ONTOLOGY	Description	N	DE	P.DE	FDR
hsa04020	KEGG	Calcium signaling pathway	241	177	9.5670791702057e-05	0.0169815655271151
hsa05165	KEGG	Human papillomavirus infection	319	226	9.43933194409638e-05	0.0169815655271151
GO:0000902	BP	cell morphogenesis	971	693	6.24973318850312e-09	1.5821546774095e-05
GO:0000904	BP	cell morphogenesis involved in differentiation	688	492	2.28682324785176e-06	0.00130257452197636
GO:0001654	BP	eye development	379	264	0.000261523710750029	0.0377123811754978
GO:0002009	BP	morphogenesis of an epithelium	504	347	0.000260847562030509	0.0377123811754978
GO:0002064	BP	epithelial cell development	202	152	4.54218200931073e-05	0.0114977876891908
GO:0005215	MF	transporter activity	1155	736	0.000118947704898562	0.0216808360672708
GO:0005216	MF	ion channel activity	424	298	8.90780596166884e-06	0.00317117892235411
GO:0005261	MF	cation channel activity	333	239	9.59295344180508e-06	0.00331160380633465
GO:0005524	MF	ATP binding	1402	930	5.94921096871833e-06	0.00255748722096752
GO:0005543	MF	phospholipid binding	441	310	3.85601526354135e-05	0.0102049048568977
GO:0005737	CC	cytoplasm	11280	6679	1.91495875976897e-06	0.00111872872775836
GO:0005886	CC	plasma membrane	5180	3104	7.57284980154862e-07	0.000492970885367096
GO:0005911	CC	cell-cell junction	478	345	2.48057860940569e-07	0.000188391676788998
GO:0005912	CC	adherens junction	170	142	3.01937556173658e-08	3.62070804203191e-05
GO:0006793	BP	phosphorus metabolic process	2671	1662	5.5215611183773e-05	0.0132424472127482
GO:0006796	BP	phosphate-containing compound metabolic process	2646	1647	5.36931008322856e-05	0.0131542323587397
GO:0006811	BP	ion transport	1489	935	0.000136513993341449	0.023385976122493
GO:0006812	BP	cation transport	1148	736	8.14369618568376e-05	0.0176710451328208
GO:0006892	BP	post-Golgi vesicle-mediated transport	101	80	9.82188729557207e-05	0.0192915413915788
GO:0007010	BP	cytoskeleton organization	1431	924	0.000223949380748471	0.0344760992633322
GO:0007154	BP	cell communication	6111	3630	1.29544914212545e-05	0.00406527420510982
GO:0007155	BP	cell adhesion	1470	948	1.1864192809596e-05	0.00391759085469326
GO:0007165	BP	signal transduction	5573	3293	3.89671138759699e-05	0.0102049048568977
GO:0007166	BP	cell surface receptor signaling pathway	2635	1644	5.35720536103361e-06	0.00239330523423117
GO:0007167	BP	enzyme-linked receptor protein signaling pathway	966	635	8.87800561993531e-05	0.0183335637213846
GO:0007267	BP	cell-cell signaling	1588	1030	6.88660350489501e-06	0.00285280680464596
GO:0007275	BP	multicellular organism development	4685	2930	3.71457367734434e-08	4.23164233323068e-05
GO:0007399	BP	nervous system development	2376	1580	7.09084507591691e-10	4.03894535524227e-06
GO:0007409	BP	axonogenesis	417	300	0.00024332380041607	0.0359992822641541
GO:0007417	BP	central nervous system development	1002	673	6.34885022440952e-05	0.014697413359931
GO:0007610	BP	behavior	609	423	4.8107888525463e-07	0.000342528166301296
GO:0008092	MF	cytoskeletal protein binding	947	649	2.77005843781952e-06	0.00146774445226232
GO:0008134	MF	transcription factor binding	567	390	2.67349485528447e-05	0.00761411334785018
GO:0008289	MF	lipid binding	786	521	1.35128495993742e-05	0.00416049682800193
GO:0008324	MF	cation transmembrane transporter activity	621	416	0.000126335279013124	0.022313356566163
GO:0009653	BP	anatomical structure morphogenesis	2673	1754	3.73107180024618e-10	4.03894535524227e-06
GO:0009719	BP	response to endogenous stimulus	1567	992	0.0001181664760622	0.0216808360672708
GO:0009887	BP	animal organ morphogenesis	1025	697	5.0738981719356e-07	0.000350314230149638
GO:0009888	BP	tissue development	1906	1218	7.40362616606334e-06	0.00295937225557171
GO:0009893	BP	positive regulation of metabolic process	3670	2235	0.000321145890596333	0.0443453816445264
GO:0009894	BP	regulation of catabolic process	942	606	0.000253023587644502	0.0369544193646945
GO:0009966	BP	regulation of signal transduction	2913	1839	5.51980964290646e-08	5.73798382721543e-05
GO:0009968	BP	negative regulation of signal transduction	1255	790	0.000304524679824376	0.0425661981909115
GO:0010243	BP	response to organonitrogen compound	1003	658	3.36163446836539e-06	0.00166503216798341
GO:0010646	BP	regulation of cell communication	3287	2072	7.7638960368007e-08	7.07570429209868e-05
GO:0010648	BP	negative regulation of cell communication	1357	856	0.00017370300296253	0.0282153921000837
GO:0010721	BP	negative regulation of cell development	181	135	0.00015547768626233	0.0260470853220656
GO:0010975	BP	regulation of neuron projection development	424	310	9.22269207374386e-06	0.00323276640320277
GO:0014069	CC	postsynaptic density	307	224	0.000190076712254072	0.0302846700139634
GO:0015075	MF	ion transmembrane transporter activity	806	533	4.37174541699609e-05	0.0113131058351709
GO:0015267	MF	channel activity	466	318	4.41918196686363e-05	0.0113131058351709
GO:0015276	MF	ligand-gated ion channel activity	138	104	0.00030021038292164	0.0422221812622633
GO:0015318	MF	inorganic molecular entity transmembrane transporter activity	700	471	1.44540700533271e-05	0.00439095376126673
GO:0016020	CC	membrane	8664	5082	3.90696309918895e-06	0.00189396270748768
GO:0016043	BP	cellular component organization	5932	3660	2.15113087905232e-08	3.2674243965552e-05
GO:0016055	BP	Wnt signaling pathway	435	310	5.56918047551127e-06	0.00244015784527017
GO:0016310	BP	phosphorylation	1750	1113	0.000122562353919688	0.0218160989977044
GO:0016358	BP	dendrite development	223	171	1.70758011345797e-05	0.00498788529551621
GO:0022008	BP	neurogenesis	1606	1104	1.52347339622476e-10	3.47108178595849e-06
GO:0022607	BP	cellular component assembly	2796	1714	0.000354373027171569	0.0485811197522544
GO:0022803	MF	passive transmembrane transporter activity	467	319	3.78375537140547e-05	0.0101422449861297
GO:0022834	MF	ligand-gated channel activity	138	104	0.00030021038292164	0.0422221812622633
GO:0022836	MF	gated channel activity	321	231	3.37451928406475e-05	0.00940395650978834
GO:0022857	MF	transmembrane transporter activity	1049	673	8.73120638664712e-05	0.0182506244324191
GO:0022890	MF	inorganic cation transmembrane transporter activity	574	387	0.000100869436111778	0.0196428139518868
GO:0023051	BP	regulation of signaling	3299	2081	6.16145134673579e-08	6.10358728191427e-05
GO:0023052	BP	signaling	6053	3598	1.11927066909614e-05	0.00375021513598331
GO:0023057	BP	negative regulation of signaling	1363	860	0.000162206100784904	0.0267804623208932
GO:0030029	BP	actin filament-based process	781	532	0.000110864781418735	0.0209609786017337
GO:0030030	BP	cell projection organization	1478	1002	2.95716745881326e-08	3.62070804203191e-05
GO:0030054	CC	cell junction	2007	1349	3.18486776325089e-09	9.07050338973852e-06
GO:0030111	BP	regulation of Wnt signaling pathway	322	230	8.40869139987943e-05	0.0179050116686779
GO:0030154	BP	cell differentiation	4072	2535	1.4577672290895e-07	0.000121418794276257
GO:0030182	BP	neuron differentiation	1322	911	8.1444517064443e-09	1.73663205330051e-05
GO:0030198	BP	extracellular matrix organization	303	216	0.000110545162312179	0.0209609786017337
GO:0030425	CC	dendrite	589	409	0.000113512235440028	0.0211988751825049
GO:0030554	MF	adenyl nucleotide binding	1475	972	1.24045620400239e-05	0.0039806414298578
GO:0031175	BP	neuron projection development	920	642	5.26774343205898e-07	0.000353000783400094
GO:0031252	CC	cell leading edge	405	296	1.23622802829812e-05	0.0039806414298578
GO:0031325	BP	positive regulation of cellular metabolic process	2958	1832	0.000144339534830742	0.0245420295640569
GO:0031344	BP	regulation of cell projection organization	628	443	8.83056192481898e-06	0.00317117892235411
GO:0032279	CC	asymmetric synapse	312	229	9.17161085737949e-05	0.0184925647588083
GO:0032501	BP	multicellular organismal process	7160	4196	0.000122038133573603	0.0218160989977044
GO:0032502	BP	developmental process	6150	3772	2.80429616379216e-08	3.62070804203191e-05
GO:0032559	MF	adenyl ribonucleotide binding	1463	967	7.3623633330171e-06	0.00295937225557171
GO:0032989	BP	cellular component morphogenesis	736	527	2.34916221881872e-07	0.000184563144805399
GO:0032990	BP	cell part morphogenesis	634	455	7.54560371901124e-06	0.00296412129541297
GO:0034220	BP	ion transmembrane transport	1091	717	1.89019626793124e-06	0.00111872872775836
GO:0034330	BP	cell junction organization	663	467	2.55587498078199e-06	0.00138650132290802
GO:0034702	CC	ion channel complex	281	201	0.000174612459889037	0.0282153921000837
GO:0035091	MF	phosphatidylinositol binding	259	192	3.38449979723773e-05	0.00940395650978834
GO:0035556	BP	intracellular signal transduction	2532	1598	7.87210584686816e-06	0.00303996711211939
GO:0036094	MF	small molecule binding	2358	1481	6.61858946794952e-05	0.0150797942437762
GO:0036211	BP	protein modification process	3406	2100	8.34064286752116e-05	0.0179050116686779
GO:0036477	CC	somatodendritic compartment	807	548	8.69254106603835e-05	0.0182506244324191
GO:0040011	BP	locomotion	1367	859	0.00024327528818392	0.0359992822641541
GO:0042391	BP	regulation of membrane potential	413	285	0.000164432725146075	0.0269527712930085
GO:0042995	CC	cell projection	2269	1484	2.68207999848619e-08	3.62070804203191e-05
GO:0043005	CC	neuron projection	1307	869	4.65332747288717e-05	0.011524066645898
GO:0043062	BP	extracellular structure organization	304	217	9.80781395152995e-05	0.0192915413915788
GO:0043167	MF	ion binding	5657	3401	0.000298529694984399	0.0422221812622633
GO:0043168	MF	anion binding	2254	1438	4.62293498256957e-06	0.00214957042128296
GO:0043412	BP	macromolecule modification	3622	2222	5.86717036697327e-05	0.0137811968702185
GO:0044093	BP	positive regulation of molecular function	1492	948	0.000201613784592075	0.0318997810287905
GO:0045202	CC	synapse	1268	855	8.47093800934266e-06	0.00316396478040759
GO:0045211	CC	postsynaptic membrane	251	184	0.000221174362832274	0.0344760992633322
GO:0045229	BP	external encapsulating structure organization	306	217	0.000160169719600989	0.0266372765794813
GO:0045892	BP	negative regulation of DNA-templated transcription	1181	761	0.000232065331559917	0.0354331669337426
GO:0048016	BP	inositol phosphate-mediated signaling	58	50	3.77183106403619e-05	0.0101422449861297
GO:0048468	BP	cell development	2069	1379	9.30009835716862e-10	4.2378688193946e-06
GO:0048518	BP	positive regulation of biological process	5979	3593	0.000111318399350851	0.0209609786017337
GO:0048522	BP	positive regulation of cellular process	5349	3255	1.80132241789243e-05	0.00519510505940015
GO:0048523	BP	negative regulation of cellular process	4616	2789	0.000133224504492705	0.0229953568966802
GO:0048583	BP	regulation of response to stimulus	3839	2357	1.79189733278708e-06	0.0011034213197357
GO:0048592	BP	eye morphogenesis	157	120	7.8204080486244e-05	0.0172990463087241
GO:0048666	BP	neuron development	1061	736	1.49215512628828e-07	0.000121418794276257
GO:0048667	BP	cell morphogenesis involved in neuron differentiation	536	384	7.09880845207791e-05	0.0160137873041726
GO:0048699	BP	generation of neurons	1391	961	1.51739781120204e-09	4.93891310434675e-06
GO:0048729	BP	tissue morphogenesis	615	421	6.38625317166948e-05	0.014697413359931
GO:0048731	BP	system development	4232	2667	8.38437174609621e-09	1.73663205330051e-05
GO:0048812	BP	neuron projection morphogenesis	595	428	1.30251499724814e-05	0.00406527420510982
GO:0048856	BP	anatomical structure development	5630	3478	1.5738449496147e-08	2.67357008273082e-05
GO:0048858	BP	cell projection morphogenesis	616	445	3.15527072467964e-06	0.00159754862646891
GO:0048863	BP	stem cell differentiation	241	175	0.000242914575406769	0.0359992822641541
GO:0048869	BP	cellular developmental process	4098	2550	2.89066197550703e-07	0.000212454330483717
GO:0048870	BP	cell motility	1696	1064	9.71052243542137e-05	0.0192915413915788
GO:0048880	BP	sensory system development	389	274	5.71063577280771e-05	0.0135532422341303
GO:0050768	BP	negative regulation of neurogenesis	140	108	0.000116190477350854	0.0215226328126981
GO:0050839	MF	cell adhesion molecule binding	544	381	3.61836181452178e-05	0.00993262115446556
GO:0050896	BP	response to stimulus	8320	4838	4.59225192993489e-05	0.0114977876891908
GO:0051056	BP	regulation of small GTPase mediated signal transduction	285	209	0.000293044624174891	0.0419920045106964
GO:0051128	BP	regulation of cellular component organization	2262	1452	8.32704472562474e-06	0.00316205645047723
GO:0051179	BP	localization	5025	3045	0.000223562923562841	0.0344760992633322
GO:0051716	BP	cellular response to stimulus	7020	4114	8.93335072118671e-05	0.0183335637213846
GO:0051961	BP	negative regulation of nervous system development	145	111	0.000150787763525755	0.0254485066975616
GO:0055085	BP	transmembrane transport	1482	939	1.57530128480402e-05	0.00466125512636037
GO:0061564	BP	axon development	463	331	0.00012960793500607	0.0225418869555595
GO:0065008	BP	regulation of biological quality	3565	2218	7.73251112437706e-08	7.07570429209868e-05
GO:0070161	CC	anchoring junction	1266	883	5.48641037595870e-10	4.03894535524227e-06
GO:0071417	BP	cellular response to organonitrogen compound	623	424	9.42413431578571e-07	0.000596442989585727
GO:0071495	BP	cellular response to endogenous stimulus	1325	858	1.52556845968885e-05	0.00457349365599351
GO:0071840	BP	cellular component organization or biogenesis	6130	3746	3.06746901065501e-06	0.001588391225881
GO:0071944	CC	cell periphery	5641	3392	1.64281869549822e-08	2.67357008273082e-05
GO:0097060	CC	synaptic membrane	355	256	0.000106305924394029	0.0205260523846911
GO:0097447	CC	dendritic tree	591	410	0.000120590695420125	0.0218058603527946
GO:0098590	CC	plasma membrane region	1194	823	1.24094386861496e-09	4.71227751708721e-06
GO:0098609	BP	cell-cell adhesion	914	590	0.000180221799595496	0.0289167146618577
GO:0098655	BP	cation transmembrane transport	889	581	5.50766133791387e-05	0.0132424472127482
GO:0098660	BP	inorganic ion transmembrane transport	873	569	7.38104382375672e-05	0.0164872257333797
GO:0098794	CC	postsynapse	588	417	9.783679887954e-06	0.00332703526219618
GO:0098984	CC	neuron to neuron synapse	335	245	9.0122855371975e-05	0.0183335637213846
GO:0099604	MF	ligand-gated calcium channel activity	26	25	0.000316333041643562	0.0439471464683348
GO:0120025	CC	plasma membrane bounded cell projection	2161	1419	1.54909594602957e-08	2.67357008273082e-05
GO:0120035	BP	regulation of plasma membrane bounded cell projection organization	612	434	4.41683971122114e-06	0.0020965265829263
GO:0120036	BP	plasma membrane bounded cell projection organization	1440	976	5.54053915900367e-08	5.73798382721543e-05
GO:0120039	BP	plasma membrane bounded cell projection morphogenesis	611	441	5.28281727772176e-06	0.00239330523423117
GO:0140096	MF	catalytic activity, acting on a protein	2103	1325	7.9022408354283e-05	0.0173119860763845
GO:0140297	MF	DNA-binding transcription factor binding	450	309	0.000247915694055162	0.0364420075700181
GO:0150063	BP	visual system development	383	268	0.000128880472562093	0.0225418869555595
GO:0198738	BP	cell-cell signaling by wnt	437	311	6.77743541640657e-06	0.00285280680464596
GO:1901265	MF	nucleoside phosphate binding	2030	1282	0.000356085279082974	0.0485811197522544
GO:1901698	BP	response to nitrogen compound	1083	700	8.76808266111545e-06	0.00317117892235411
GO:1901699	BP	cellular response to nitrogen compound	674	454	2.35415995193746e-06	0.00130822391085227
GO:1901981	MF	phosphatidylinositol phosphate binding	168	126	0.000235962616007603	0.0356037896895181
GO:1902679	BP	negative regulation of RNA biosynthetic process	1184	763	0.000207348413464122	0.0325808707059762
GO:1903507	BP	negative regulation of nucleic acid-templated transcription	1183	762	0.000233276643261121	0.0354331669337426
GO:1905114	BP	cell surface receptor signaling pathway involved in cell-cell signaling	553	395	9.89918003102519e-08	8.67472760872608e-05

## Sheet: female down
	ONTOLOGY	Description	N	DE	P.DE	FDR
hsa01522	KEGG	Endocrine resistance	95	75	0.000402094563930727	0.023790595032568
hsa04012	KEGG	ErbB signaling pathway	80	66	0.000223520537579985	0.0165443393869383
hsa04360	KEGG	Axon guidance	175	135	0.000133017259945751	0.0165443393869383
hsa04919	KEGG	Thyroid hormone signaling pathway	117	97	1.635291117146e-06	0.00058052834658683
hsa05205	KEGG	Proteoglycans in cancer	199	146	0.000233018864604765	0.0165443393869383
hsa05223	KEGG	Non-small cell lung cancer	71	59	0.000212477062416353	0.0165443393869383
GO:0000166	MF	nucleotide binding	2029	1301	1.34467142410646e-07	0.000102123312422805
GO:0000902	BP	cell morphogenesis	971	691	1.56211116065518e-09	3.95457118715197e-06
GO:0000904	BP	cell morphogenesis involved in differentiation	688	502	3.76376709286193e-09	6.23222674033248e-06
GO:0003712	MF	transcription coregulator activity	463	317	0.000108273418962528	0.0186886483154715
GO:0004672	MF	protein kinase activity	539	379	2.20687292727592e-05	0.00613187716768959
GO:0005262	MF	calcium channel activity	116	93	2.01718077685235e-05	0.0056740057802227
GO:0005515	MF	protein binding	13047	7563	1.22532055702221e-05	0.0039320709255203
GO:0005524	MF	ATP binding	1402	928	3.97709491795768e-07	0.00022101007466036
GO:0005622	CC	intracellular anatomical structure	14178	8091	0.000152900617821513	0.0243614522828347
GO:0005634	CC	nucleus	7421	4235	0.000198014430400695	0.0289202614246759
GO:0005654	CC	nucleoplasm	3907	2455	1.43819125251611e-13	1.63838747486635e-09
GO:0005737	CC	cytoplasm	11280	6667	1.25146706708679e-10	4.07334652235793e-07
GO:0005768	CC	endosome	963	618	0.000307839865919975	0.0388543862626221
GO:0005813	CC	centrosome	599	392	0.00022240925684167	0.0316710781742537
GO:0005829	CC	cytosol	5130	3202	2.06291306104205e-15	4.70014111827821e-11
GO:0005856	CC	cytoskeleton	2255	1414	1.54223639678777e-06	0.00070576735889589
GO:0005925	CC	focal adhesion	408	290	1.4015620930935e-05	0.00431529604446518
GO:0006281	BP	DNA repair	551	356	0.000182050627597119	0.0271100751579919
GO:0006468	BP	protein phosphorylation	1493	943	0.000231898268035953	0.0326146304872294
GO:0006511	BP	ubiquitin-dependent protein catabolic process	631	422	7.20364012165277e-07	0.000364728303403859
GO:0006793	BP	phosphorus metabolic process	2671	1645	7.4670462203843e-05	0.0142965698390955
GO:0006796	BP	phosphate-containing compound metabolic process	2646	1631	6.23913186912162e-05	0.0123610765657449
GO:0006810	BP	transport	4270	2568	0.000171280193994665	0.0260163195998296
GO:0006974	BP	cellular response to DNA damage stimulus	827	533	2.51889441027304e-05	0.00659660807398403
GO:0006996	BP	organelle organization	3373	2080	4.34832479571181e-08	4.2865531304628e-05
GO:0007010	BP	cytoskeleton organization	1431	913	0.000387872835065282	0.0472582602894513
GO:0007264	BP	small GTPase mediated signal transduction	474	342	3.25605229680071e-07	0.000190220244949506
GO:0007265	BP	Ras protein signal transduction	329	238	8.79201075931115e-06	0.00312995583031477
GO:0007275	BP	multicellular organism development	4685	2864	8.18969587052722e-05	0.0150919887813963
GO:0007399	BP	nervous system development	2376	1534	5.69015136928645e-06	0.00223524842754866
GO:0007409	BP	axonogenesis	417	301	5.79426212197438e-05	0.0117143934439548
GO:0008047	MF	enzyme activator activity	516	346	0.000177977574563351	0.0268545765486847
GO:0008104	BP	protein localization	2343	1493	4.10302848950962e-09	6.23222674033248e-06
GO:0008134	MF	transcription factor binding	567	384	8.77638583807962e-05	0.0157893032347919
GO:0009056	BP	catabolic process	2431	1479	4.03090044000229e-05	0.00904875733546449
GO:0009057	BP	macromolecule catabolic process	1296	830	1.8100490553513e-07	0.000121294581403306
GO:0009653	BP	anatomical structure morphogenesis	2673	1680	0.000279429660509768	0.0369463219857643
GO:0009893	BP	positive regulation of metabolic process	3670	2219	0.00015613854041174	0.0245342103775247
GO:0009894	BP	regulation of catabolic process	942	616	1.96878141566421e-06	0.00084635312782063
GO:0009896	BP	positive regulation of catabolic process	503	339	1.55747562772008e-05	0.00466914798710187
GO:0009966	BP	regulation of signal transduction	2913	1781	0.00041112990232801	0.0497070879171278
GO:0010256	BP	endomembrane system organization	558	371	4.05097106836981e-05	0.00904875733546449
GO:0010498	BP	proteasomal protein catabolic process	498	324	0.000376400523104229	0.0461070404215417
GO:0010604	BP	positive regulation of macromolecule metabolic process	3365	2044	0.000109946628688895	0.018834766827427
GO:0010646	BP	regulation of cell communication	3287	2017	0.000193674372949577	0.0286537461901505
GO:0010975	BP	regulation of neuron projection development	424	302	0.000145867777956476	0.0235705776805699
GO:0012505	CC	endomembrane system	4447	2655	0.000284362390009037	0.0370223582512337
GO:0014069	CC	postsynaptic density	307	222	0.000213254479588227	0.0305584280687935
GO:0015085	MF	calcium ion transmembrane transporter activity	131	104	2.51255948094704e-05	0.00659660807398403
GO:0015630	CC	microtubule cytoskeleton	1299	831	1.5076058098451e-05	0.00457990543620142
GO:0016043	BP	cellular component organization	5932	3666	1.54650929174314e-11	7.04713354061512e-08
GO:0016192	BP	vesicle-mediated transport	1470	957	1.08881850272577e-07	8.85987170217994e-05
GO:0016301	MF	kinase activity	690	475	2.00226795068049e-05	0.0056740057802227
GO:0016310	BP	phosphorylation	1750	1111	2.26188222420536e-05	0.00620900296340903
GO:0016604	CC	nuclear body	800	522	1.27769575646038e-05	0.00404319723822129
GO:0016607	CC	nuclear speck	396	268	0.000101536131850049	0.017659536092149
GO:0016740	MF	transferase activity	2089	1293	0.000126799996378893	0.0210876723904869
GO:0016772	MF	transferase activity, transferring phosphorus-containing groups	827	554	4.85333944667042e-05	0.010334437939527
GO:0016773	MF	phosphotransferase activity, alcohol group as acceptor	641	444	2.95724686223956e-05	0.00737623427181129
GO:0017076	MF	purine nucleotide binding	1796	1162	1.25467432588432e-07	9.85741373825802e-05
GO:0018130	BP	heterocycle biosynthetic process	3754	2254	3.2512158236471e-05	0.00788062383548444
GO:0019219	BP	regulation of nucleobase-containing compound metabolic process	3749	2245	0.000144865273166326	0.0235705776805699
GO:0019438	BP	aromatic compound biosynthetic process	3767	2259	4.45513512158307e-05	0.00966721891525225
GO:0019899	MF	enzyme binding	1977	1284	4.08216030470812e-09	6.23222674033248e-06
GO:0019900	MF	kinase binding	738	500	6.02653746724596e-06	0.00232357789391376
GO:0019901	MF	protein kinase binding	659	444	5.66622520098166e-05	0.0116305653134384
GO:0019941	BP	modification-dependent protein catabolic process	641	427	1.55915402659342e-06	0.00070576735889589
GO:0022008	BP	neurogenesis	1606	1045	0.000334770088016598	0.0416797906304381
GO:0023051	BP	regulation of signaling	3299	2029	0.000101462973482877	0.017659536092149
GO:0030030	BP	cell projection organization	1478	1002	2.37331153830468e-09	4.91577546261217e-06
GO:0030036	BP	actin cytoskeleton organization	695	469	0.000416482109661828	0.0499427809817636
GO:0030054	CC	cell junction	2007	1353	3.58853169989464e-11	1.36268510417333e-07
GO:0030055	CC	cell-substrate junction	416	293	4.58320816879145e-05	0.00985130329412684
GO:0030163	BP	protein catabolic process	944	611	5.44680275368725e-06	0.00217719217438615
GO:0030182	BP	neuron differentiation	1322	879	3.57864495725089e-05	0.0083839799823222
GO:0030515	MF	snoRNA binding	31	26	0.000301788210399853	0.0386288909311812
GO:0030554	MF	adenyl nucleotide binding	1475	975	1.89525090741842e-07	0.000123375419070346
GO:0030674	MF	protein-macromolecule adaptor activity	329	233	1.16658958737241e-05	0.00379708245124185
GO:0030695	MF	GTPase regulator activity	447	317	2.97846538363167e-05	0.00737623427181129
GO:0031175	BP	neuron projection development	920	637	4.87454151901396e-07	0.000258282683649335
GO:0031267	MF	small GTPase binding	256	193	1.57979877561843e-06	0.00070576735889589
GO:0031323	BP	regulation of cellular metabolic process	5308	3164	4.11494289041867e-06	0.0017046337966418
GO:0031324	BP	negative regulation of cellular metabolic process	2172	1326	0.000225135332542812	0.0318601454450647
GO:0031325	BP	positive regulation of cellular metabolic process	2958	1841	7.08599866488805e-07	0.000364728303403859
GO:0031329	BP	regulation of cellular catabolic process	756	495	1.79029883452458e-05	0.00522950880074462
GO:0031331	BP	positive regulation of cellular catabolic process	412	279	7.04509864785614e-05	0.0136030108129453
GO:0031344	BP	regulation of cell projection organization	628	436	3.71783768720961e-05	0.00855628422882663
GO:0031974	CC	membrane-enclosed lumen	5653	3271	9.5782110080925e-06	0.00325716357624447
GO:0031981	CC	nuclear lumen	4582	2688	4.54528784146984e-07	0.000246571043285831
GO:0032279	CC	asymmetric synapse	312	225	0.000264143651585852	0.0361847130039333
GO:0032535	BP	regulation of cellular component size	347	245	0.000151304629316622	0.0242769343264078
GO:0032553	MF	ribonucleotide binding	1800	1164	1.49823249210732e-07	0.000107521198024566
GO:0032555	MF	purine ribonucleotide binding	1783	1154	1.51057095020866e-07	0.000107521198024566
GO:0032559	MF	adenyl ribonucleotide binding	1463	966	3.39645145981917e-07	0.0001934618751513
GO:0032989	BP	cellular component morphogenesis	736	529	1.8224876390338e-08	1.88743447126119e-05
GO:0032990	BP	cell part morphogenesis	634	466	5.60461794113672e-09	7.0942008428255e-06
GO:0033036	BP	macromolecule localization	2803	1749	4.81076815811883e-08	4.38434166858318e-05
GO:0033365	BP	protein localization to organelle	876	565	6.11897268411277e-06	0.00232357789391376
GO:0033674	BP	positive regulation of kinase activity	464	316	0.000117679380545201	0.0200090075100139
GO:0034654	BP	nucleobase-containing compound biosynthetic process	3687	2215	3.89486254566821e-05	0.00887405482405046
GO:0035556	BP	intracellular signal transduction	2532	1576	3.25131074673252e-05	0.00788062383548444
GO:0035639	MF	purine ribonucleoside triphosphate binding	1715	1110	2.96713796963655e-07	0.000177903346053156
GO:0036094	MF	small molecule binding	2358	1477	1.11521450111862e-05	0.00368247060775169
GO:0036211	BP	protein modification process	3406	2083	6.1923239765877e-05	0.0123610765657449
GO:0042176	BP	regulation of protein catabolic process	338	230	0.000195656193624277	0.0287601981647454
GO:0042995	CC	cell projection	2269	1448	1.89955994979747e-05	0.00547842707546654
GO:0043085	BP	positive regulation of catalytic activity	1117	713	0.00017009952716755	0.0260103867582917
GO:0043087	BP	regulation of GTPase activity	342	241	0.000164997101945727	0.0255734283723228
GO:0043161	BP	proteasome-mediated ubiquitin-dependent protein catabolic process	432	287	0.00013317193646102	0.0219868797125209
GO:0043167	MF	ion binding	5657	3387	2.70663122200865e-05	0.00700771429116421
GO:0043168	MF	anion binding	2254	1418	2.40995269553451e-05	0.00653670978750693
GO:0043197	CC	dendritic spine	167	127	0.000274023421266523	0.0365108165505056
GO:0043226	CC	organelle	13507	7671	0.000308665902103871	0.0388543862626221
GO:0043227	CC	membrane-bounded organelle	12731	7226	0.000207428484344215	0.0301022330401185
GO:0043229	CC	intracellular organelle	12665	7260	1.90654449892259e-06	0.00083535980506639
GO:0043231	CC	intracellular membrane-bounded organelle	11628	6653	8.12466335428742e-06	0.0029856827397433
GO:0043233	CC	organelle lumen	5653	3271	9.5782110080925e-06	0.00325716357624447
GO:0043412	BP	macromolecule modification	3622	2205	3.60617116514912e-05	0.0083839799823222
GO:0043547	BP	positive regulation of GTPase activity	257	182	0.000343762988954748	0.0425668257627444
GO:0043549	BP	regulation of kinase activity	742	485	0.000261698225744618	0.0361365598506993
GO:0043632	BP	modification-dependent macromolecule catabolic process	653	435	7.65306834920654e-07	0.000379059802757221
GO:0044085	BP	cellular component biogenesis	3047	1845	7.54492747944163e-05	0.0143253023076332
GO:0044093	BP	positive regulation of molecular function	1492	952	9.9370845852787e-06	0.00332950787045573
GO:0044248	BP	cellular catabolic process	2011	1233	5.80989492260751e-05	0.0117143934439548
GO:0044260	BP	cellular macromolecule metabolic process	3076	1839	5.19417467905939e-06	0.00211328706942302
GO:0044265	BP	cellular macromolecule catabolic process	958	623	2.44895898638527e-07	0.000150802923096762
GO:0044271	BP	cellular nitrogen compound biosynthetic process	4475	2632	0.000181741295092712	0.0271100751579919
GO:0044309	CC	neuron spine	168	127	0.000412334955070978	0.0497070879171278
GO:0045184	BP	establishment of protein localization	1590	991	9.42869721401728e-05	0.0167830810409508
GO:0045202	CC	synapse	1268	854	7.83227541744902e-07	0.000379682049172677
GO:0045732	BP	positive regulation of protein catabolic process	197	142	8.57426394000862e-05	0.0156284823687325
GO:0045893	BP	positive regulation of DNA-templated transcription	1613	1018	0.000268399600494414	0.0361847130039333
GO:0045935	BP	positive regulation of nucleobase-containing compound metabolic process	1954	1226	6.47500945901745e-05	0.0126091124371157
GO:0046907	BP	intracellular transport	1495	961	4.51532984248188e-08	4.2865531304628e-05
GO:0048468	BP	cell development	2069	1340	2.72440281140926e-06	0.00114949617879905
GO:0048518	BP	positive regulation of biological process	5979	3564	4.95188191830478e-05	0.010446636817283
GO:0048522	BP	positive regulation of cellular process	5349	3239	1.43107404696487e-06	0.000679283147625993
GO:0048666	BP	neuron development	1061	732	7.60439126392606e-08	6.41697965027005e-05
GO:0048667	BP	cell morphogenesis involved in neuron differentiation	536	392	2.44263868728643e-07	0.000150802923096762
GO:0048699	BP	generation of neurons	1391	923	3.48265159869812e-05	0.00827331056149913
GO:0048731	BP	system development	4232	2587	0.000303740850324523	0.038661628680413
GO:0048812	BP	neuron projection morphogenesis	595	440	5.4189830974928e-09	7.0942008428255e-06
GO:0048856	BP	anatomical structure development	5630	3388	0.000282156777805609	0.0369463219857643
GO:0048858	BP	cell projection morphogenesis	616	454	7.5531439588508e-09	8.60454159792284e-06
GO:0050790	BP	regulation of catalytic activity	2241	1372	0.000290090273166519	0.0375535044535567
GO:0051020	MF	GTPase binding	286	209	2.85080113874032e-05	0.00729805091517521
GO:0051056	BP	regulation of small GTPase mediated signal transduction	285	212	2.49870416049613e-05	0.00659660807398403
GO:0051128	BP	regulation of cellular component organization	2262	1431	4.42841580293929e-05	0.00966721891525225
GO:0051173	BP	positive regulation of nitrogen compound metabolic process	2994	1851	8.41431761966202e-06	0.00304304464518063
GO:0051179	BP	localization	5025	3059	6.90057527425719e-08	6.04702719417984e-05
GO:0051234	BP	establishment of localization	4423	2665	8.17452975643667e-05	0.0150919887813963
GO:0051252	BP	regulation of RNA metabolic process	3445	2074	0.000100894428882703	0.017659536092149
GO:0051254	BP	positive regulation of RNA metabolic process	1758	1109	8.21368771459422e-05	0.0150919887813963
GO:0051338	BP	regulation of transferase activity	862	556	0.000211535380685154	0.0305039374274085
GO:0051347	BP	positive regulation of transferase activity	552	375	1.37445484239507e-05	0.0042898053601547
GO:0051603	BP	proteolysis involved in protein catabolic process	733	479	6.58731072526462e-06	0.00246041455023654
GO:0051641	BP	cellular localization	3171	2023	4.50072792372457e-12	2.56361462535351e-08
GO:0051649	BP	establishment of localization in cell	1992	1282	2.0393710869042e-09	4.64650308440253e-06
GO:0051668	BP	localization within membrane	637	421	0.000317450014721739	0.0397405556891214
GO:0060090	MF	molecular adaptor activity	461	331	9.08204988819857e-09	9.85359165012935e-06
GO:0060589	MF	nucleoside-triphosphatase regulator activity	447	317	2.97846538363167e-05	0.00737623427181129
GO:0061136	BP	regulation of proteasomal protein catabolic process	181	128	0.00014412102966508	0.0235705776805699
GO:0061629	MF	RNA polymerase II-specific DNA-binding transcription factor binding	337	234	0.000267162897733643	0.0361847130039333
GO:0065009	BP	regulation of molecular function	2941	1791	6.41421741131574e-05	0.0125984077154671
GO:0070013	CC	intracellular organelle lumen	5653	3271	9.5782110080925e-06	0.00325716357624447
GO:0070161	CC	anchoring junction	1266	874	1.08920577545635e-09	3.10205804849968e-06
GO:0070727	BP	cellular macromolecule localization	2353	1498	5.33512609837198e-09	7.0942008428255e-06
GO:0071705	BP	nitrogen compound transport	1913	1175	0.000358884157220423	0.0441990088546493
GO:0071840	BP	cellular component organization or biogenesis	6130	3783	1.95411690916804e-12	1.48408665528282e-08
GO:0080135	BP	regulation of cellular response to stress	693	449	0.000233342808223368	0.0326164573163265
GO:0097367	MF	carbohydrate derivative binding	2143	1341	5.0010245459679e-05	0.010453517729847
GO:0098984	CC	neuron to neuron synapse	335	241	0.000239981949480787	0.0333399313229894
GO:0120025	CC	plasma membrane bounded cell projection	2161	1378	4.16360085320159e-05	0.00921004678051892
GO:0120035	BP	regulation of plasma membrane bounded cell projection organization	612	426	3.48594546130581e-05	0.00827331056149913
GO:0120036	BP	plasma membrane bounded cell projection organization	1440	977	3.49792285963206e-09	6.23222674033248e-06
GO:0120039	BP	plasma membrane bounded cell projection morphogenesis	611	451	6.41716303989185e-09	7.69519172109979e-06
GO:0140535	CC	intracellular protein-containing complex	838	529	0.000125095606194987	0.0209571933201955
GO:1901265	MF	nucleoside phosphate binding	2030	1301	1.55732072279261e-07	0.000107521198024566
GO:1901362	BP	organic cyclic compound biosynthetic process	3914	2337	7.70198634393042e-05	0.0145026493272819
GO:1901565	BP	organonitrogen compound catabolic process	1279	796	0.000155764974942862	0.0245342103775247
GO:1901575	BP	organic substance catabolic process	1996	1215	0.000162146051727598	0.0253036687846684
GO:1901800	BP	positive regulation of proteasomal protein catabolic process	113	85	0.000122819051379407	0.02072821678984
GO:1902494	CC	catalytic complex	1548	948	0.000167258422663248	0.0257487560943205
GO:1902680	BP	positive regulation of RNA biosynthetic process	1619	1021	0.000280790105979124	0.0369463219857643
GO:1903050	BP	regulation of proteolysis involved in protein catabolic process	212	152	1.74937340218821e-05	0.00517632773966963
GO:1903052	BP	positive regulation of proteolysis involved in protein catabolic process	129	97	5.50477624801846e-05	0.0114018929122593
GO:1903508	BP	positive regulation of nucleic acid-templated transcription	1613	1018	0.000268399600494414	0.0361847130039333
GO:2000058	BP	regulation of ubiquitin-dependent protein catabolic process	161	118	8.8010951141967e-05	0.0157893032347919
GO:2000060	BP	positive regulation of ubiquitin-dependent protein catabolic process	105	80	0.000292194564505057	0.0376122088004701
GO:2000779	BP	regulation of double-strand break repair	127	93	0.000272859986632313	0.0365108165505056

## Sheet: male down
	ONTOLOGY	Description	N	DE	P.DE	FDR
hsa01521	KEGG	EGFR tyrosine kinase inhibitor resistance	77	64	0.00021568492733468	0.0109383070291159
hsa04012	KEGG	ErbB signaling pathway	80	67	7.73579900451135e-05	0.00787384060447264
hsa04014	KEGG	Ras signaling pathway	227	161	0.000708600548682861	0.0262752738049771
hsa04020	KEGG	Calcium signaling pathway	241	170	0.00143395349589878	0.0406848566907183
hsa04072	KEGG	Phospholipase D signaling pathway	144	112	8.87193307546213e-05	0.00787384060447264
hsa04151	KEGG	PI3K-Akt signaling pathway	339	230	0.00127231125434222	0.0406848566907183
hsa04360	KEGG	Axon guidance	175	137	3.21616816746706e-05	0.00570869849725403
hsa04390	KEGG	Hippo signaling pathway	154	117	0.00015230995903773	0.0108140070916789
hsa04510	KEGG	Focal adhesion	195	143	0.00196780881691911	0.0436607581253928
hsa04550	KEGG	Signaling pathways regulating pluripotency of stem cells	139	102	0.000714113191467321	0.0262752738049771
hsa04919	KEGG	Thyroid hormone signaling pathway	117	90	0.00074014855788668	0.0262752738049771
hsa04929	KEGG	GnRH secretion	62	52	0.000207436184705561	0.0109383070291159
hsa05205	KEGG	Proteoglycans in cancer	199	150	1.19396032607572e-05	0.0042385591575688
hsa05213	KEGG	Endometrial cancer	56	46	0.00164300873032873	0.0406848566907183
hsa05230	KEGG	Central carbon metabolism in cancer	67	53	0.0015694634940765	0.0406848566907183
hsa05231	KEGG	Choline metabolism in cancer	95	73	0.00171907845172049	0.0406848566907183
GO:0000122	BP	negative regulation of transcription by RNA polymerase II	873	573	9.16522347602218e-06	0.0012890151338129
GO:0000166	MF	nucleotide binding	2029	1286	4.86398061254867e-06	0.000778513083388788
GO:0000785	CC	chromatin	1203	750	0.00038706712807209	0.0292017796224983
GO:0000902	BP	cell morphogenesis	971	702	8.64464023600131e-12	1.40685345097896e-08
GO:0000904	BP	cell morphogenesis involved in differentiation	688	506	4.09109360630081e-10	4.21125756385662e-07
GO:0001221	MF	transcription coregulator binding	105	85	3.00682171160385e-05	0.00351320132703498
GO:0001501	BP	skeletal system development	520	355	5.45715162095235e-05	0.00583735880430884
GO:0001654	BP	eye development	379	260	0.000409138454803821	0.0307650513341593
GO:0001701	BP	in utero embryonic development	380	258	0.000171106382143718	0.0152881874931861
GO:0001708	BP	cell fate specification	106	81	0.000569788103816424	0.0403169321656938
GO:0001764	BP	neuron migration	167	126	0.000220014434453807	0.0187837377764539
GO:0002009	BP	morphogenesis of an epithelium	504	345	0.000140501940824726	0.0128047848790023
GO:0002062	BP	chondrocyte differentiation	111	86	0.000489285831788157	0.0356162568417296
GO:0002520	BP	immune system development	981	626	5.31135516661103e-06	0.000834578731834936
GO:0003281	BP	ventricular septum development	74	61	0.000161337803847192	0.0145869862018032
GO:0003779	MF	actin binding	414	293	9.01267186271255e-05	0.00866433399662628
GO:0004672	MF	protein kinase activity	539	376	5.86507374998992e-05	0.00615805715759311
GO:0005515	MF	protein binding	13047	7524	3.05165073326314e-06	0.000547470947296594
GO:0005524	MF	ATP binding	1402	930	1.05935748345363e-07	3.02383818354222e-05
GO:0005604	CC	basement membrane	94	75	0.000320471552507938	0.0250055611381537
GO:0005654	CC	nucleoplasm	3907	2371	1.93211189749489e-06	0.000382793369326292
GO:0005667	CC	transcription regulator complex	480	328	1.47970480397612e-05	0.00190472283919728
GO:0005737	CC	cytoplasm	11280	6589	3.43696930763197e-08	1.22356107351698e-05
GO:0005789	CC	endoplasmic reticulum membrane	1098	680	3.14212825890185e-05	0.00365256378830713
GO:0005829	CC	cytosol	5130	3116	4.78401212467719e-09	2.86839295391171e-06
GO:0005905	CC	clathrin-coated pit	69	57	0.000235029734094763	0.0195796117876403
GO:0005911	CC	cell-cell junction	478	326	0.000448960517009479	0.033319597457798
GO:0005912	CC	adherens junction	170	133	3.80791318844158e-05	0.00427386670371689
GO:0005925	CC	focal adhesion	408	286	7.10063232631999e-05	0.007158442784198
GO:0005938	CC	cell cortex	302	214	0.000734240755598723	0.0487724238354557
GO:0006351	BP	DNA-templated transcription	3265	1986	6.21568182718682e-08	1.96691798264756e-05
GO:0006355	BP	regulation of DNA-templated transcription	3156	1918	1.75663224150249e-07	4.60035735521755e-05
GO:0006357	BP	regulation of transcription by RNA polymerase II	2386	1464	1.54710082726457e-06	0.00031193933848138
GO:0006366	BP	transcription by RNA polymerase II	2467	1508	3.23875431008543e-06	0.000576498267195206
GO:0006468	BP	protein phosphorylation	1493	952	1.12588408922355e-05	0.00154156493540632
GO:0006793	BP	phosphorus metabolic process	2671	1640	4.273313174183e-05	0.00468092150772045
GO:0006796	BP	phosphate-containing compound metabolic process	2646	1623	6.09721649541833e-05	0.0063144991196187
GO:0006810	BP	transport	4270	2590	1.07501269692293e-07	3.02383818354222e-05
GO:0006885	BP	regulation of pH	91	69	0.000384385784949425	0.0291792778873076
GO:0006915	BP	apoptotic process	1822	1118	2.26419068181798e-05	0.00277351185454521
GO:0006935	BP	chemotaxis	591	383	0.000262796030894284	0.0213840884567691
GO:0006996	BP	organelle organization	3373	2037	6.2249404439628e-05	0.00641760375906102
GO:0007010	BP	cytoskeleton organization	1431	908	0.000530162341263086	0.0382253758966397
GO:0007015	BP	actin filament organization	428	298	0.000130242999746346	0.0119174960089187
GO:0007154	BP	cell communication	6111	3544	0.000254220824876822	0.0209861133115707
GO:0007155	BP	cell adhesion	1470	931	2.80708769394902e-05	0.00336614136941761
GO:0007165	BP	signal transduction	5573	3214	0.000487420239588593	0.0355941754448285
GO:0007166	BP	cell surface receptor signaling pathway	2635	1622	2.85490908944524e-06	0.000516240068999368
GO:0007167	BP	enzyme-linked receptor protein signaling pathway	966	639	1.1620939332742e-06	0.00024515877940481
GO:0007169	BP	transmembrane receptor protein tyrosine kinase signaling pathway	619	416	3.70582783544708e-05	0.0042006756916829
GO:0007267	BP	cell-cell signaling	1588	1016	7.9288057024998e-06	0.00113616295047645
GO:0007275	BP	multicellular organism development	4685	2989	5.96717204003485e-18	6.7978023880077e-14
GO:0007389	BP	pattern specification process	455	306	0.000569663176068392	0.0403169321656938
GO:0007399	BP	nervous system development	2376	1626	4.54861567187536e-19	1.03635659468008e-14
GO:0007409	BP	axonogenesis	417	307	1.25653800049983e-06	0.000262651025719158
GO:0007411	BP	axon guidance	229	173	7.84628877564132e-05	0.00770559670104362
GO:0007417	BP	central nervous system development	1002	688	1.47890285674926e-08	6.5043467628842e-06
GO:0007420	BP	brain development	721	494	7.76914795818197e-06	0.00112033080429885
GO:0007423	BP	sensory organ development	560	375	0.000307108210366054	0.024147323710018
GO:0007610	BP	behavior	609	412	1.40965537769304e-05	0.00183529075002047
GO:0007611	BP	learning or memory	263	188	0.000206417323926205	0.0178821760773181
GO:0008092	MF	cytoskeletal protein binding	947	642	3.36456830422738e-06	0.000594250575531136
GO:0008104	BP	protein localization	2343	1461	4.85652349336473e-06	0.000778513083388788
GO:0008134	MF	transcription factor binding	567	395	2.39366006509679e-07	5.99309350804014e-05
GO:0008219	BP	cell death	2038	1252	2.75765153129589e-06	0.000506696229750368
GO:0008283	BP	cell population proliferation	1949	1192	3.55972687884667e-06	0.000614430433391231
GO:0009058	BP	biosynthetic process	5517	3259	1.62842962455026e-08	7.00040388033079e-06
GO:0009059	BP	macromolecule biosynthetic process	4438	2631	4.38447637083658e-07	0.000104058239201188
GO:0009628	BP	response to abiotic stimulus	1094	694	6.04290467549181e-05	0.00628682831627422
GO:0009653	BP	anatomical structure morphogenesis	2673	1749	4.17992881065157e-12	7.32580754014502e-09
GO:0009719	BP	response to endogenous stimulus	1567	992	3.86041498646294e-06	0.00066132101542535
GO:0009725	BP	response to hormone	831	527	0.000755954989678716	0.049923705753159
GO:0009790	BP	embryo development	1096	741	1.13966012857057e-08	5.52468433390464e-06
GO:0009792	BP	embryo development ending in birth or egg hatching	657	460	8.39618573900077e-09	4.44880688086962e-06
GO:0009887	BP	animal organ morphogenesis	1025	684	8.05265630583572e-06	0.00114669825795101
GO:0009888	BP	tissue development	1906	1192	5.77065729804885e-05	0.00608697480920115
GO:0009889	BP	regulation of biosynthetic process	3903	2337	7.01669914309983e-08	2.14503641555063e-05
GO:0009890	BP	negative regulation of biosynthetic process	1558	969	6.37384506604849e-06	0.000955405828847689
GO:0009891	BP	positive regulation of biosynthetic process	1966	1260	3.15513976077363e-09	2.11431483263137e-06
GO:0009893	BP	positive regulation of metabolic process	3670	2256	5.93355447147448e-09	3.2973196360506e-06
GO:0009966	BP	regulation of signal transduction	2913	1824	5.48634578366591e-09	3.1250225583761e-06
GO:0009967	BP	positive regulation of signal transduction	1497	928	0.000262195287734789	0.0213840884567691
GO:0009968	BP	negative regulation of signal transduction	1255	787	4.0587111149266e-05	0.00453121143536117
GO:0010033	BP	response to organic substance	2958	1761	9.37200988862416e-05	0.00897192744968121
GO:0010243	BP	response to organonitrogen compound	1003	646	1.14283577771978e-05	0.00154156493540632
GO:0010556	BP	regulation of macromolecule biosynthetic process	3682	2211	9.93605006727306e-08	2.90234570170191e-05
GO:0010557	BP	positive regulation of macromolecule biosynthetic process	1822	1172	1.37755179790482e-08	6.5043467628842e-06
GO:0010558	BP	negative regulation of macromolecule biosynthetic process	1467	923	6.22365117940385e-07	0.000143231988355088
GO:0010604	BP	positive regulation of macromolecule metabolic process	3365	2073	1.6941587130316e-08	7.01812947594764e-06
GO:0010646	BP	regulation of cell communication	3287	2069	3.58120000819355e-10	4.07970304933409e-07
GO:0010647	BP	positive regulation of cell communication	1684	1053	1.88263740721187e-05	0.0023698348445257
GO:0010648	BP	negative regulation of cell communication	1357	847	8.20289064140785e-05	0.00802123005896294
GO:0010720	BP	positive regulation of cell development	293	209	0.0002097106912703	0.0180986681435701
GO:0010941	BP	regulation of cell death	1585	969	4.50365305489599e-05	0.00490962828721293
GO:0010975	BP	regulation of neuron projection development	424	308	6.97529861731285e-06	0.00103198184218738
GO:0012501	BP	programmed cell death	1879	1148	3.18243688159103e-05	0.00368064172132843
GO:0012505	CC	endomembrane system	4447	2656	2.97065771235637e-05	0.00350691530146775
GO:0014069	CC	postsynaptic density	307	224	6.86513686573482e-05	0.0069517901488401
GO:0014074	BP	response to purine-containing compound	135	100	0.000265721054534325	0.0215451548274379
GO:0015031	BP	protein transport	1486	912	0.000667040516558591	0.0452316997894969
GO:0016043	BP	cellular component organization	5932	3639	8.87505043077577e-11	1.18946558243997e-07
GO:0016049	BP	cell growth	470	320	0.000220934829133835	0.0187837377764539
GO:0016055	BP	Wnt signaling pathway	435	305	1.43554034093662e-05	0.00185837222317613
GO:0016192	BP	vesicle-mediated transport	1470	937	2.77294864826977e-05	0.00334279693133219
GO:0016301	MF	kinase activity	690	473	2.9107794030385e-05	0.00347220931512195
GO:0016310	BP	phosphorylation	1750	1113	4.2048679442159e-06	0.000714953068962799
GO:0016358	BP	dendrite development	223	172	2.07881405237199e-06	0.000398014280413811
GO:0016477	BP	cell migration	1509	965	5.33713483171566e-08	1.73716114294014e-05
GO:0016772	MF	transferase activity, transferring phosphorus-containing groups	827	547	0.000239742623150036	0.0198628942758197
GO:0016773	MF	phosphotransferase activity, alcohol group as acceptor	641	444	2.14135692993226e-05	0.00263722574549062
GO:0017076	MF	purine nucleotide binding	1796	1152	1.14059013170133e-06	0.000242871080006383
GO:0018130	BP	heterocycle biosynthetic process	3754	2261	3.14886124864759e-07	7.71437147195556e-05
GO:0019219	BP	regulation of nucleobase-containing compound metabolic process	3749	2246	1.55575860012314e-05	0.00198024603045841
GO:0019220	BP	regulation of phosphate metabolic process	1342	842	7.23378789505674e-05	0.00726055609695915
GO:0019438	BP	aromatic compound biosynthetic process	3767	2267	6.38426340604976e-07	0.000144018868755879
GO:0019838	MF	growth factor binding	127	96	0.000637110998196838	0.0439733900659764
GO:0019898	CC	extrinsic component of membrane	301	220	5.84384442879661e-07	0.000135863419862961
GO:0019899	MF	enzyme binding	1977	1268	6.62629847373616e-08	2.06813129350143e-05
GO:0019900	MF	kinase binding	738	486	0.000410953564595422	0.030799888209678
GO:0019904	MF	protein domain specific binding	653	445	1.13599403001812e-05	0.00154156493540632
GO:0021535	BP	cell migration in hindbrain	16	16	0.000706272754151461	0.0471305449409502
GO:0022008	BP	neurogenesis	1606	1127	2.37552008387419e-16	9.02064159849826e-13
GO:0022603	BP	regulation of anatomical structure morphogenesis	938	629	1.88717641965833e-07	4.88607131198811e-05
GO:0023051	BP	regulation of signaling	3299	2076	4.251181705087e-10	4.21125756385662e-07
GO:0023052	BP	signaling	6053	3510	0.000304571507683375	0.024147323710018
GO:0023056	BP	positive regulation of signaling	1688	1057	1.31926351374622e-05	0.00174756394751128
GO:0023057	BP	negative regulation of signaling	1363	852	5.98200462751365e-05	0.00625201804739775
GO:0030004	BP	cellular monovalent inorganic cation homeostasis	106	80	0.000234520257847469	0.0195796117876403
GO:0030029	BP	actin filament-based process	781	541	2.25269054998628e-07	5.76688780796489e-05
GO:0030030	BP	cell projection organization	1478	990	4.24733845605063e-08	1.44434864750235e-05
GO:0030036	BP	actin cytoskeleton organization	695	487	1.74217035558538e-07	4.60035735521755e-05
GO:0030054	CC	cell junction	2007	1338	1.11214528657845e-09	9.38485859607538e-07
GO:0030055	CC	cell-substrate junction	416	290	0.000130111857736752	0.0119174960089187
GO:0030097	BP	hemopoiesis	881	559	3.73592922846391e-05	0.00421383225452088
GO:0030111	BP	regulation of Wnt signaling pathway	322	225	0.000296067789050393	0.0236688017744707
GO:0030154	BP	cell differentiation	4072	2562	2.30166391295105e-13	5.82679006585296e-10
GO:0030155	BP	regulation of cell adhesion	768	498	0.000165176524479368	0.0148164643060548
GO:0030177	BP	positive regulation of Wnt signaling pathway	136	103	0.000339466026479568	0.0261297092814543
GO:0030182	BP	neuron differentiation	1322	946	1.1290869729412e-16	5.14502351829845e-13
GO:0030234	MF	enzyme regulator activity	1171	729	0.000685581907272975	0.0463510331611498
GO:0030334	BP	regulation of cell migration	968	610	0.000104575415567975	0.0098456457367799
GO:0030425	CC	dendrite	589	401	0.000430421342243	0.0320481041230866
GO:0030554	MF	adenyl nucleotide binding	1475	980	1.95838797636274e-08	7.89574951255952e-06
GO:0030641	BP	regulation of cellular pH	82	65	4.76289475720581e-05	0.00514302341934489
GO:0030695	MF	GTPase regulator activity	447	312	0.000196321974553823	0.017072518581047
GO:0031090	CC	organelle membrane	3457	2074	4.68760727549798e-06	0.000762874601178185
GO:0031175	BP	neuron projection development	920	650	2.6129824176271e-09	1.80406640615806e-06
GO:0031252	CC	cell leading edge	405	289	0.000102913890268658	0.00972941940199628
GO:0031323	BP	regulation of cellular metabolic process	5308	3175	5.25237254903041e-09	3.06846297838741e-06
GO:0031324	BP	negative regulation of cellular metabolic process	2172	1345	2.37006466736659e-07	5.99309350804014e-05
GO:0031325	BP	positive regulation of cellular metabolic process	2958	1856	1.91389480940766e-09	1.40665094637239e-06
GO:0031326	BP	regulation of cellular biosynthetic process	3841	2301	5.89823353032426e-08	1.89275144725223e-05
GO:0031327	BP	negative regulation of cellular biosynthetic process	1532	954	5.36198351612656e-06	0.000836763235831696
GO:0031328	BP	positive regulation of cellular biosynthetic process	1926	1236	3.61855352305189e-09	2.29014231858929e-06
GO:0031344	BP	regulation of cell projection organization	628	440	4.57244246725932e-06	0.000754916878072727
GO:0031984	CC	organelle subcompartment	1389	868	2.80654130441605e-06	0.000511553896638522
GO:0032092	BP	positive regulation of protein binding	84	65	0.000568689387498864	0.0403169321656938
GO:0032279	CC	asymmetric synapse	312	227	8.76657801776062e-05	0.00846346243884144
GO:0032502	BP	developmental process	6150	3782	1.24513676351955e-13	3.54614950250369e-10
GO:0032535	BP	regulation of cellular component size	347	243	0.000288859634197299	0.0231738658646171
GO:0032553	MF	ribonucleotide binding	1800	1155	1.06550657535067e-06	0.000231204779169425
GO:0032555	MF	purine ribonucleotide binding	1783	1145	1.09737732333869e-06	0.000235874008820272
GO:0032559	MF	adenyl ribonucleotide binding	1463	973	2.07928796854622e-08	7.89574951255952e-06
GO:0032774	BP	RNA biosynthetic process	3282	1992	1.07182506499237e-07	3.02383818354222e-05
GO:0032870	BP	cellular response to hormone stimulus	574	374	0.000707454633506188	0.0471305449409502
GO:0032872	BP	regulation of stress-activated MAPK cascade	185	131	0.00059649396499455	0.0415612186496508
GO:0032879	BP	regulation of localization	2042	1278	1.87927034574483e-06	0.000375590311907458
GO:0032880	BP	regulation of protein localization	810	520	0.000477934990103245	0.035126680046814
GO:0032989	BP	cellular component morphogenesis	736	530	8.80533989036465e-09	4.55956509231973e-06
GO:0032990	BP	cell part morphogenesis	634	468	1.68285196067977e-09	1.27806996907093e-06
GO:0033036	BP	macromolecule localization	2803	1716	2.60031485502242e-05	0.00315136030089525
GO:0033554	BP	cellular response to stress	1874	1171	2.62055314273258e-07	6.48985682652381e-05
GO:0034330	BP	cell junction organization	663	448	0.000583044416033825	0.0407487238494315
GO:0034654	BP	nucleobase-containing compound biosynthetic process	3687	2223	4.63120982431283e-07	0.000108780911997055
GO:0035239	BP	tube morphogenesis	909	584	6.67797149917814e-05	0.00682291043216479
GO:0035295	BP	tube development	1111	711	4.25329038739184e-05	0.00468092150772045
GO:0035556	BP	intracellular signal transduction	2532	1604	3.90698831274091e-09	2.40586004641862e-06
GO:0035639	MF	purine ribonucleoside triphosphate binding	1715	1099	5.67838850661512e-06	0.000874164890099453
GO:0036094	MF	small molecule binding	2358	1455	0.00019466447793893	0.0170585979436946
GO:0036211	BP	protein modification process	3406	2084	8.89934738274706e-06	0.00125939584328266
GO:0036477	CC	somatodendritic compartment	807	536	0.000502763957482073	0.0364808089403553
GO:0040007	BP	growth	878	575	6.34446034177306e-05	0.00651135965887196
GO:0040011	BP	locomotion	1367	861	5.60331963500068e-06	0.00086847642560446
GO:0040012	BP	regulation of locomotion	1069	674	4.26670044742438e-05	0.00468092150772045
GO:0042127	BP	regulation of cell population proliferation	1667	1014	3.67153636938332e-05	0.00418261423200148
GO:0042175	CC	nuclear outer membrane-endoplasmic reticulum membrane network	1119	691	4.96634279739312e-05	0.00533741293848136
GO:0042330	BP	taxis	593	384	0.000261533275451304	0.0213840884567691
GO:0042981	BP	regulation of apoptotic process	1405	855	0.000320016831042341	0.0250055611381537
GO:0042995	CC	cell projection	2269	1439	4.07697658114923e-05	0.00453121143536117
GO:0043005	CC	neuron projection	1307	871	9.15810552347846e-07	0.000200632957929743
GO:0043009	BP	chordate embryonic development	637	447	9.7689622941854e-09	4.83860949805913e-06
GO:0043067	BP	regulation of programmed cell death	1437	873	0.00033100732922506	0.0257394914302518
GO:0043087	BP	regulation of GTPase activity	342	244	2.99656656317784e-05	0.00351320132703498
GO:0043167	MF	ion binding	5657	3378	6.08426510972609e-06	0.000930361719865766
GO:0043168	MF	anion binding	2254	1422	2.30343214781095e-06	0.000433730562444005
GO:0043197	CC	dendritic spine	167	127	0.000256177696802012	0.0210713091838882
GO:0043231	CC	intracellular membrane-bounded organelle	11628	6570	0.000336287736997914	0.025972812880544
GO:0043269	BP	regulation of ion transport	684	438	0.000580188169701341	0.0406997497673381
GO:0043412	BP	macromolecule modification	3622	2197	1.97134209793839e-05	0.00245437477373925
GO:0044087	BP	regulation of cellular component biogenesis	911	598	7.62009520128237e-05	0.00751585493792284
GO:0044093	BP	positive regulation of molecular function	1492	952	2.73747917735662e-06	0.000506696229750368
GO:0044249	BP	cellular biosynthetic process	5373	3174	2.55223459575093e-08	9.37905048864342e-06
GO:0044271	BP	cellular nitrogen compound biosynthetic process	4475	2639	4.51483959464993e-06	0.000750847484120467
GO:0044309	CC	neuron spine	168	127	0.000385488177847594	0.0291792778873076
GO:0045165	BP	cell fate commitment	275	199	1.19572019042335e-05	0.00160254640109445
GO:0045184	BP	establishment of protein localization	1590	976	0.00065800007275689	0.0448858492745299
GO:0045202	CC	synapse	1268	847	6.30711356221882e-06	0.00095315052809876
GO:0045595	BP	regulation of cell differentiation	1562	1023	1.6256783288733e-10	1.94944500237101e-07
GO:0045597	BP	positive regulation of cell differentiation	877	575	1.06163996115624e-05	0.00147490273627949
GO:0045664	BP	regulation of neuron differentiation	191	145	7.31190579894524e-06	0.00106601163551241
GO:0045892	BP	negative regulation of DNA-templated transcription	1181	775	9.2802493319307e-08	2.74598962050272e-05
GO:0045893	BP	positive regulation of DNA-templated transcription	1613	1047	2.07115424028627e-08	7.89574951255952e-06
GO:0045934	BP	negative regulation of nucleobase-containing compound metabolic process	1410	898	1.2781107687789e-05	0.00170295179858821
GO:0045935	BP	positive regulation of nucleobase-containing compound metabolic process	1954	1249	2.12507932923954e-08	7.93734548153994e-06
GO:0045944	BP	positive regulation of transcription by RNA polymerase II	1188	788	1.41074040636598e-08	6.5043467628842e-06
GO:0046683	BP	response to organophosphorus	121	89	0.000577586885949157	0.0406997497673381
GO:0046872	MF	metal ion binding	3992	2365	0.000505998413212987	0.0365989455449038
GO:0048468	BP	cell development	2069	1374	3.58419158612317e-11	5.44414807321535e-08
GO:0048513	BP	animal organ development	3416	2124	1.4844892541695e-08	6.5043467628842e-06
GO:0048518	BP	positive regulation of biological process	5979	3591	7.11419518878602e-09	3.85928150431668e-06
GO:0048519	BP	negative regulation of biological process	5476	3153	7.50861506295822e-05	0.00743809937367131
GO:0048522	BP	positive regulation of cellular process	5349	3268	1.04765396302859e-10	1.32609710520241e-07
GO:0048523	BP	negative regulation of cellular process	4616	2822	5.68597153146972e-11	8.09682346081287e-08
GO:0048534	BP	hematopoietic or lymphoid organ development	923	588	1.89338487071229e-05	0.00237026818100598
GO:0048568	BP	embryonic organ development	440	305	4.62866847356487e-05	0.00502188488103343
GO:0048583	BP	regulation of response to stimulus	3839	2322	1.29463878975764e-06	0.000265739190863406
GO:0048585	BP	negative regulation of response to stimulus	1627	986	0.000638833923447954	0.0439733900659764
GO:0048589	BP	developmental growth	622	415	0.000223270138092452	0.0188406919492534
GO:0048592	BP	eye morphogenesis	157	116	0.000555791568177003	0.0398212424193234
GO:0048598	BP	embryonic morphogenesis	601	407	0.000121917707382945	0.0112460447166519
GO:0048646	BP	anatomical structure formation involved in morphogenesis	1202	774	3.55405663535763e-06	0.000614430433391231
GO:0048666	BP	neuron development	1061	757	2.16323283943399e-12	4.107258084472e-09
GO:0048667	BP	cell morphogenesis involved in neuron differentiation	536	404	3.82977635860196e-10	4.15512497878034e-07
GO:0048699	BP	generation of neurons	1391	993	5.47835445315679e-17	3.12047069651811e-13
GO:0048706	BP	embryonic skeletal system development	126	96	0.000580557350526022	0.0406997497673381
GO:0048729	BP	tissue morphogenesis	615	409	0.00069127858146117	0.0464604460177325
GO:0048731	BP	system development	4232	2711	4.4451562275032e-17	3.12047069651811e-13
GO:0048812	BP	neuron projection morphogenesis	595	444	5.44527671281761e-10	4.96260738499346e-07
GO:0048813	BP	dendrite morphogenesis	130	107	7.3033670982567e-06	0.00106601163551241
GO:0048856	BP	anatomical structure development	5630	3491	6.01382488309475e-14	1.9574140876633e-10
GO:0048858	BP	cell projection morphogenesis	616	457	1.37905638059638e-09	1.12215787769671e-06
GO:0048863	BP	stem cell differentiation	241	178	1.49527322061726e-05	0.0019139497223901
GO:0048869	BP	cellular developmental process	4098	2574	5.29720199092497e-13	1.20691450161234e-09
GO:0048870	BP	cell motility	1696	1066	6.31416554393823e-07	0.000143861947753089
GO:0048880	BP	sensory system development	389	268	0.000213310663343235	0.0183398873721218
GO:0050767	BP	regulation of neurogenesis	361	262	4.886208344654e-06	0.000778513083388788
GO:0050769	BP	positive regulation of neurogenesis	218	159	0.000456952876372406	0.0338026439456783
GO:0050770	BP	regulation of axonogenesis	145	113	0.000416187869411529	0.031089916120237
GO:0050790	BP	regulation of catalytic activity	2241	1389	2.0265482694823e-06	0.000394861442318095
GO:0050793	BP	regulation of developmental process	2456	1588	1.98342736022933e-12	4.107258084472e-09
GO:0050794	BP	regulation of cellular process	10343	5936	9.29454508019193e-06	0.00129918352826437
GO:0050804	BP	modulation of chemical synaptic transmission	430	298	0.000222373260544249	0.0188347671681791
GO:0050890	BP	cognition	301	213	0.000121077615169709	0.0112460447166519
GO:0051049	BP	regulation of transport	1714	1069	2.36283389310454e-05	0.00287886670697828
GO:0051094	BP	positive regulation of developmental process	1324	862	4.77784444294718e-08	1.60085893806042e-05
GO:0051128	BP	regulation of cellular component organization	2262	1461	3.53678583615926e-09	2.29014231858929e-06
GO:0051129	BP	negative regulation of cellular component organization	672	437	0.000546677148138865	0.0392917733223845
GO:0051171	BP	regulation of nitrogen compound metabolic process	5360	3181	4.16673179569393e-08	1.43840632171349e-05
GO:0051172	BP	negative regulation of nitrogen compound metabolic process	2307	1411	7.532650577065e-07	0.000168258736027303
GO:0051173	BP	positive regulation of nitrogen compound metabolic process	2994	1875	2.02620659709505e-09	1.44265909713167e-06
GO:0051174	BP	regulation of phosphorus metabolic process	1343	843	6.8168964483215e-05	0.00693375753029272
GO:0051179	BP	localization	5025	3047	3.37568662331895e-08	1.22081974643967e-05
GO:0051234	BP	establishment of localization	4423	2684	7.06099592548706e-08	2.14503641555063e-05
GO:0051239	BP	regulation of multicellular organismal process	2780	1664	0.000235464081364705	0.0195796117876403
GO:0051240	BP	positive regulation of multicellular organismal process	1493	919	0.000284729505485352	0.0229232404698879
GO:0051246	BP	regulation of protein metabolic process	2519	1497	0.00036658953955393	0.0281224783474638
GO:0051252	BP	regulation of RNA metabolic process	3445	2084	2.02768560179148e-06	0.000394861442318095
GO:0051253	BP	negative regulation of RNA metabolic process	1287	830	5.09484509247336e-06	0.000806117712409118
GO:0051254	BP	positive regulation of RNA metabolic process	1758	1134	1.47487415464091e-08	6.5043467628842e-06
GO:0051345	BP	positive regulation of hydrolase activity	557	361	0.000646495438573588	0.044233489707089
GO:0051452	BP	intracellular pH reduction	47	39	0.000175902775555095	0.0155944312772268
GO:0051453	BP	regulation of intracellular pH	77	61	8.60242012400494e-05	0.00834032085554589
GO:0051641	BP	cellular localization	3171	1955	7.34567357687183e-06	0.00106601163551241
GO:0051649	BP	establishment of localization in cell	1992	1230	0.00030267873451993	0.0241127003052521
GO:0051716	BP	cellular response to stimulus	7020	4045	5.73415671691298e-05	0.00607660589014629
GO:0051960	BP	regulation of nervous system development	436	312	1.38619225150339e-06	0.000281991109448689
GO:0051962	BP	positive regulation of nervous system development	262	189	0.000232917713473877	0.0195796117876403
GO:0055067	BP	monovalent inorganic cation homeostasis	153	109	0.000690121722254098	0.0464604460177325
GO:0060070	BP	canonical Wnt signaling pathway	297	208	0.000159940218396365	0.0145182387886167
GO:0060090	MF	molecular adaptor activity	461	307	0.000662558758643211	0.0450619067370953
GO:0060284	BP	regulation of cell development	497	351	1.28658061517062e-06	0.000265739190863406
GO:0060322	BP	head development	766	529	3.60443251776514e-07	8.64456741944852e-05
GO:0060341	BP	regulation of cellular localization	921	585	0.000747574091439357	0.0495137444748672
GO:0060412	BP	ventricular septum morphogenesis	43	38	0.00011106621580809	0.0104137146542038
GO:0060429	BP	epithelium development	1158	734	0.000119417728105462	0.0111508750703067
GO:0060485	BP	mesenchyme development	296	209	9.62589688354102e-05	0.00913818477477494
GO:0060560	BP	developmental growth involved in morphogenesis	219	167	1.36783964133288e-05	0.00179108381540967
GO:0060589	MF	nucleoside-triphosphatase regulator activity	447	312	0.000196321974553823	0.017072518581047
GO:0061024	BP	membrane organization	773	493	0.000473807408197162	0.0349360129073273
GO:0061351	BP	neural precursor cell proliferation	146	110	0.000163130613855166	0.014690782237455
GO:0061564	BP	axon development	463	333	1.36068975475782e-05	0.00179108381540967
GO:0061629	MF	RNA polymerase II-specific DNA-binding transcription factor binding	337	231	0.000703161381871413	0.0471200850722302
GO:0065008	BP	regulation of biological quality	3565	2174	2.5979412912337e-06	0.000485176183438267
GO:0065009	BP	regulation of molecular function	2941	1827	1.49044829953379e-09	1.17097841574406e-06
GO:0070161	CC	anchoring junction	1266	866	9.07344214160075e-09	4.59398457231625e-06
GO:0070302	BP	regulation of stress-activated protein kinase signaling cascade	188	133	0.000646250785456858	0.044233489707089
GO:0070727	BP	cellular macromolecule localization	2353	1467	4.64044791139262e-06	0.000760632843260212
GO:0070887	BP	cellular response to chemical stimulus	2960	1758	9.51321762450336e-05	0.00906900210697425
GO:0071310	BP	cellular response to organic substance	2346	1404	0.000379206539672179	0.0288957919728794
GO:0071417	BP	cellular response to organonitrogen compound	623	407	0.000194422885562905	0.0170585979436946
GO:0071495	BP	cellular response to endogenous stimulus	1325	853	2.06266320342012e-06	0.000398014280413811
GO:0071840	BP	cellular component organization or biogenesis	6130	3735	4.8092983738649e-10	4.56562725625574e-07
GO:0072359	BP	circulatory system development	1164	738	7.36498337451052e-05	0.00732767603514619
GO:0080090	BP	regulation of primary metabolic process	5514	3267	5.20025343620338e-08	1.71713875783272e-05
GO:0080135	BP	regulation of cellular response to stress	693	446	0.00030582196577867	0.024147323710018
GO:0097367	MF	carbohydrate derivative binding	2143	1342	1.14345362571835e-05	0.00154156493540632
GO:0097447	CC	dendritic tree	591	401	0.000618203438266029	0.0428119973782772
GO:0097485	BP	neuron projection guidance	230	173	0.000121491152595606	0.0112460447166519
GO:0097659	BP	nucleic acid-templated transcription	3267	1986	7.16082414889974e-08	2.14673970274384e-05
GO:0098588	CC	bounding membrane of organelle	2016	1255	1.76086175977712e-05	0.00222885968526454
GO:0098590	CC	plasma membrane region	1194	787	2.0116347539483e-05	0.00249092859967163
GO:0098793	CC	presynapse	497	341	0.000559240850516958	0.0399427697121579
GO:0098794	CC	postsynapse	588	414	6.80149939907414e-06	0.00101284550528435
GO:0098796	CC	membrane protein complex	1125	697	0.000482867755405858	0.0353751091291546
GO:0098827	CC	endoplasmic reticulum subcompartment	1100	681	3.39102733690749e-05	0.00388247069568343
GO:0098984	CC	neuron to neuron synapse	335	245	2.96911957904174e-05	0.00350691530146775
GO:0099177	BP	regulation of trans-synaptic signaling	431	299	0.000191939824370719	0.0169502207692344
GO:0099572	CC	postsynaptic specialization	326	234	0.000172925205480417	0.0153903432877571
GO:0120025	CC	plasma membrane bounded cell projection	2161	1363	0.000270081972894014	0.0218210910298483
GO:0120035	BP	regulation of plasma membrane bounded cell projection organization	612	430	4.35893899644221e-06	0.000735659748851402
GO:0120036	BP	plasma membrane bounded cell projection organization	1440	969	1.98034509934457e-08	7.89574951255952e-06
GO:0120039	BP	plasma membrane bounded cell projection morphogenesis	611	455	6.78896965774253e-10	5.9492263339233e-07
GO:0140110	MF	transcription regulator activity	1802	1089	0.000220946353760957	0.0187837377764539
GO:0140297	MF	DNA-binding transcription factor binding	450	314	6.31696496413768e-06	0.00095315052809876
GO:0150063	BP	visual system development	383	263	0.000307352698205109	0.024147323710018
GO:0198738	BP	cell-cell signaling by wnt	437	307	1.10767451192822e-05	0.00152953067150136
GO:1901265	MF	nucleoside phosphate binding	2030	1287	4.48727426306093e-06	0.000750847484120467
GO:1901362	BP	organic cyclic compound biosynthetic process	3914	2347	7.87359685226447e-07	0.000174167020079606
GO:1901576	BP	organic substance biosynthetic process	5437	3209	3.49151399701486e-08	1.22385622935364e-05
GO:1901698	BP	response to nitrogen compound	1083	684	5.63513660140125e-05	0.00599957721151057
GO:1901699	BP	cellular response to nitrogen compound	674	435	0.000369777518985575	0.0282718489683468
GO:1901700	BP	response to oxygen-containing compound	1620	991	8.30480691966695e-05	0.00808618465203811
GO:1901701	BP	cellular response to oxygen-containing compound	1167	729	3.27922192644193e-05	0.00377342385717439
GO:1902531	BP	regulation of intracellular signal transduction	1675	1057	3.49080280377722e-06	0.000611803469855848
GO:1902532	BP	negative regulation of intracellular signal transduction	525	338	0.00033233946888404	0.0257551784321563
GO:1902679	BP	negative regulation of RNA biosynthetic process	1184	775	1.4666123016819e-07	4.02593911825546e-05
GO:1902680	BP	positive regulation of RNA biosynthetic process	1619	1051	1.67738781819927e-08	7.01812947594764e-06
GO:1903506	BP	regulation of nucleic acid-templated transcription	3158	1919	3.30276015931309e-07	8.00532845423292e-05
GO:1903507	BP	negative regulation of nucleic acid-templated transcription	1183	775	1.26441431208447e-07	3.51322142518689e-05
GO:1903508	BP	positive regulation of nucleic acid-templated transcription	1613	1047	2.07115424028627e-08	7.89574951255952e-06
GO:1905114	BP	cell surface receptor signaling pathway involved in cell-cell signaling	553	390	1.56336830637351e-07	4.24045041576359e-05
GO:1990138	BP	neuron projection extension	162	122	0.000614993468622014	0.0427195463081828
GO:2000026	BP	regulation of multicellular organismal development	1405	890	2.26631552348031e-06	0.000430297774058128
GO:2000145	BP	regulation of cell motility	1025	645	7.35919837701521e-05	0.00732767603514619
GO:2001141	BP	regulation of RNA biosynthetic process	3166	1924	1.59185331738153e-07	4.26691599802598e-05
