# Supplementary material for: Sex-specific and multiomic integration enhance accuracy of peripheral blood biomarkers of major depressive disorder
Source: Research Square preprint supplement (doi:10.21203/rs.3.rs-3978037/v1), 2024-02-23
Supplement: Supplementary file 4 [file 87f8c45e8fc04e05cc7784f5.xlsx]

## Sheet: Feuil1
Supplementary Table 7: RRHO2 best -log10(p-values) in each quadrant (UU: quadrant of upregulated features in females and males; DD: quarant of downregulated features in females and males; UD: quadrant of features upregulated in females but downregulated in males; DU: quadrant of features downregulated in females but upregulated in males
RRHO2	Best UU	Best DD	Best UD	Best DU
DNAm	410.331	193.014	16.2815	13.935
miRNA	8.53438	1.57517	2.86688	1.46456
mRNA	29.0743	3.95225	10.1671	12.4109
