# Supplementary material for: Sex-specific and multiomic integration enhance accuracy of peripheral blood biomarkers of major depressive disorder
Source: Research Square preprint supplement (doi:10.21203/rs.3.rs-3978037/v1), 2024-02-23
Supplement: Supplementary file 5 [file c8478f38721d2b9ba2323d45.xlsx]

## Sheet: Feuille1
GWAS Phenotype	MDD (excluding 23 andMe data)	BD1 and BD2	PTSD (Childhood Trauma)	BMI
First Author	Wray et al. (2018)	Stahl et al. (2019)	Dalvie et al. (2020)	Shungin et al. (2015)
N	135,458 MDD 344,901 controls	14,879 BD1 3,421 BD2 31,358 controls	124,711 samples (with available childhood maltreatment data)	224,459 samples
Article	Genome-wide association analyses identify 44 risk variants and refine the genetic architecture of major depression	Genome-wide association study identifies 30 loci associated with bipolar disorder	Genomic influences on self-reported childhood maltreatment	New genetic loci link adipose and insulin biology to body fat distribution
