# Supplementary material for: Sex-specific and multiomic integration enhance accuracy of peripheral blood biomarkers of major depressive disorder
Source: Research Square preprint supplement (doi:10.21203/rs.3.rs-3978037/v1), 2024-02-23
Supplement: Supplementary file 6 [file c913c971e1f5c73e869001dc.xlsx]

## Sheet: FemaleModules
Module					Prioritization	GSEA enrichments for RNA dysregulation			GSEA enrichments for DNAm dysregulation			Enrichments for DE miRNAs targets					Module eigengene correlation with MDD status, HDRS or CTQ						Enrichments for SNPs associated to trait or disease (using GWAS datasets)					# enrichments with FDR <0,1					Top enrichments
ID	Code	# genes	All_Genes	All_Symbols	score	NES	pval	padj	ES	pval	padj	miRNAs	module genes overlapping with miRNA targets	ORA.logODs	ORA.pvals	ORA.padj	MDD status	Pval.MDDstatus	HDRS	Pval.HDRS	CTQ	Pval.CTQ	MDD (2018 23andMe)	Trauma (Complete pgc)	BipolarDisorde 1 (pgc)	Bipolar Disorder 2 (pgc)	BMI	KEGG	Panther	Reactome	Wikipathway	geneontology_Biological_Process	KEGG	Panther	Reactome	Wikipathway	geneontology_Biological_Process
F:ME129	brown4	67	ENSG00000000419;ENSG00000034713;ENSG00000086666;ENSG00000093144;ENSG00000100410;ENSG00000103671;ENSG00000104325;ENSG00000111276;ENSG00000114784;ENSG00000115128;ENSG00000119013;ENSG00000119048;ENSG00000119878;ENSG00000120688;ENSG00000121022;ENSG00000126860;ENSG00000129055;ENSG00000130755;ENSG00000131966;ENSG00000133639;ENSG00000136810;ENSG00000137767;ENSG00000137947;ENSG00000139233;ENSG00000140932…	DPM1;GABARAPL2;ZFAND6;ECHDC1;PHF5A;TRIP4;DECR1;CDKN1B;EIF1B;SF3B6;NDUFB3;UBE2B;CRIPT;WBP4;COPS5;EVI2A;ANAPC13;GMFG;ACTR10;BTG1;TXN;SQRDL;GTF2B;LLPH;CMTM2;S100A8;DYNLT1;WTAP;PSMD4;ZNF230;ZNF222;DPY30;S100A11;S100A12;SNIP1;H2AFZ;NDUFB6;TERF2IP;FNTA;KBTBD2;NAT1;KRCC1;GLRX;GNG5;TMEM70;MRFAP1L1;NOP10;TM2D3;IFITM2;PSMD13;BLOC1S2;SIAH1;PSMD12;CARD16;AIF1;LST1;PRR13;SUPT4H1;PPP3R1;VIM-AS1;HSBP1;LINC01506…	0.419514	-2.12538	0.000407664	0.0034865	-0.295236	0.672284	0.868103	miR-124-3p/miR-532-3p/miR-92a-3p/miR-1270/miR-181d-5p/miR-4286/miR-4516/miR-5585-3p/miR-23a-5p/miR-320b/miR-550a-3p	ENSG00000034713,ENSG00000100410,ENSG00000111276,ENSG00000119048,ENSG00000120688,ENSG00000129055,ENSG00000133639,ENSG00000146425,ENSG00000146457,ENSG00000163191,ENSG00000163877,ENSG00000164032,ENSG00000166848,ENSG00000170852,ENSG00000173221,ENSG00000174021,ENSG00000205352,ENSG00000213246,ENSG00000221823,ENSG00000265241/ENSG00000111276,ENSG00000170852,ENSG00000184277,ENSG00000196470/ENSG00000034713…	2.004/2.816/1.842/2.911/2.104/2.729/3.827/3.357/2.952/1.505/1.63	0/0/0.001/0.005/0.005/0.007/0.02/0.032/0.048/0.064/0.167	2.54203384109267e-12/0.000394930739335068/0.00311404828503133/0.0105445273896513/0.0105445273896513/0.0119881864494556/0.0315864348189965/0.0439576223650431/0.0581461918618728/0.0707603323357084/0.167208756745398	-0.452482	1.25974e-06	-0.383792	5.31045e-05	-0.310435	0.00126877	0.17497	0.80585	0.27112	0.0026346	0.73253	0	1	7	1	0	hsa03050 (Proteasome)	P00013 (Cell cycle)	R-HSA-2262752 (Cellular responses to stress)	WP183 (Proteasome Degradation)	GO:0002446 (neutrophil mediated immunity)
F:ME89	bisque4	67	ENSG00000007923;ENSG00000073584;ENSG00000084693;ENSG00000100147;ENSG00000106133;ENSG00000122965;ENSG00000129197;ENSG00000135437;ENSG00000140323;ENSG00000140400;ENSG00000140650;ENSG00000142396;ENSG00000154124;ENSG00000163635;ENSG00000165646;ENSG00000166333;ENSG00000166348;ENSG00000166439;ENSG00000167196;ENSG00000177082;ENSG00000196329;ENSG00000197837;ENSG00000201217;ENSG00000203667;ENSG00000211900…	DNAJC11;SMARCE1;AGBL5;CCDC134;NSUN5P2;RBM19;RPAIN;RDH5;DISP2;MAN2C1;PMM2;ERVK3-1;OTULIN;ATXN7;SLC18A2;ILK;USP54;RNF169;FBXO22;WDR73;GIMAP5;HIST4H4;Y_RNA;COX20;IGHJ6;FAM24B;RP3-382I10.7;ZNF891;AC025171.1;AC015971.2;ANKRD10-IT1;RP11-383F6.1;MORF4L2-AS1;RP11-47G11.2;RP11-767N6.2;PARGP1;RP11-430C7.4;HYPK;STAG3L5P;CNTF;MRPS31P5;RN7SL172P;RN7SL834P;RP11-402J7.2;RP11-1277A3.2;RP11-582J16.5;RP11-395I14.2…	0.40721	1.88124	0.0010688	0.00550845	0.288984	0.943553	1	miR-124-3p/miR-92a-3p/miR-4286/miR-550a-3p	ENSG00000122965,ENSG00000129197,ENSG00000140650,ENSG00000166333,ENSG00000166348,ENSG00000167196,ENSG00000177082,ENSG00000203667/ENSG00000140650,ENSG00000154124,ENSG00000163635,ENSG00000242028/ENSG00000163635,ENSG00000166348/ENSG00000167196	1.088/1.619/2.729/1.63	0.003/0.006/0.006/0.163	0.0225858647046455/0.0225858647046455/0.0225858647046455/0.447065465500747	0.540964	2.56004e-09	0.494549	8.22331e-08	0.365735	0.000124744	0.41178	0.42086	0.62177	0.011656	0.97222	0	0	0	0	0	hsa05034 (Alcoholism)	P04375 (5HT3 type receptor mediated signaling pathway)	R-HSA-3214858 (RMTs methylate histone arginines)	WP4758 (Nephrotic syndrome)	GO:0051291 (protein heterooligomerization)
F:ME90	navajowhite2	59	ENSG00000099139;ENSG00000100902;ENSG00000104824;ENSG00000110844;ENSG00000115607;ENSG00000126746;ENSG00000139200;ENSG00000143379;ENSG00000151006;ENSG00000152767;ENSG00000161960;ENSG00000162139;ENSG00000165507;ENSG00000167220;ENSG00000169682;ENSG00000170917;ENSG00000171824;ENSG00000175592;ENSG00000178127;ENSG00000184208;ENSG00000186354;ENSG00000204152;ENSG00000205476;ENSG00000205710;ENSG00000211787…	PCSK5;PSMA6;HNRNPL;PRPF40B;IL18RAP;ZNF384;PIANP;SETDB1;PRSS53;FARP1;EIF4A1;NEU3;C10orf10;HDHD2;SPNS1;NUDT6;EXOSC10;FOSL1;NDUFV2;C22orf46;C9orf47;TIMM23B;CCDC85C;C17orf107;TRAV8-3;SEC14L1P1;SNORD63;RPL32P1;DNAJC19P5;LENG8-AS1;AC007278.3;AC003104.1;AC007278.2;OR7E140P;BMS1P4;TMEM110-MUSTN1;KRT8P33;RNU6ATAC24P;RP11-727A23.4;EBLN2;RP11-983P16.4;LINC00641;RP11-468E2.4;RP11-315D16.2;AC009133.17;RP11-32…	0.397136	1.88602	0.000547795	0.0034865	0.363699	0.181173	0.416384	miR-532-3p/miR-124-3p/miR-550a-3p/miR-320b	ENSG00000104824,ENSG00000161960/ENSG00000139200,ENSG00000152767,ENSG00000161960,ENSG00000167220,ENSG00000175592,ENSG00000178127/ENSG00000104824/ENSG00000104824	2.25/0.927/1.757/0.939	0.014/0.016/0.139/0.288	0.0889602534598392/0.0889602534598392/0.50963014198125/0.792244347046476	0.609061	5.4346e-12	0.567251	2.80657e-10	0.38318	5.47083e-05	0.65976	0.13089	0.507	0.50328	0.56884	0	0	0	0	0	hsa00511 (Other glycan degradation)	P00049 (Parkinson disease)	R-HSA-446652 (Interleukin-1 family signaling)	WP2814 (Mammary gland development pathway - Puberty (Stage 2 of 4))	GO:0046677 (response to antibiotic)
F:ME14	blue2	46	ENSG00000013441;ENSG00000034533;ENSG00000091844;ENSG00000101413;ENSG00000103160;ENSG00000105136;ENSG00000105186;ENSG00000106993;ENSG00000108733;ENSG00000112079;ENSG00000113240;ENSG00000119231;ENSG00000127993;ENSG00000135211;ENSG00000136709;ENSG00000147118;ENSG00000151657;ENSG00000152433;ENSG00000155868;ENSG00000162222;ENSG00000163166;ENSG00000165572;ENSG00000166704;ENSG00000168564;ENSG00000168806…	CLK1;ASTE1;RGS17;RPRD1B;HSDL1;ZNF419;ANKRD27;CDC37L1;PEX12;STK38;CLK4;SENP5;RBM48;TMEM60;WDR33;ZNF182;KIN;ZNF547;MED7;TTC9C;IWS1;KBTBD6;ZNF606;CDKN2AIP;LCMT2;PPID;CDK5R1;YIPF6;FANCF;FAM122A;WDR5B;ZSCAN26;ZNF830;TRIM13;PLPP6;MIR17HG;RP1-39G22.7;PAN3-AS1;LINC00909;RP11-370I10.12;RP11-154H23.3;RP11-285J16.1;RP4-758J18.13;RP11-344N10.5;CTD-2649C14.2;ZNF2	0.387495	-2.16176	0.000342583	0.0034865	-0.369642	0.0272897	0.166219	miR-124-3p/miR-92a-3p/miR-550a-3p/miR-4516/miR-5585-3p/miR-1270/miR-4286/miR-181d-5p/miR-320b	ENSG00000101413,ENSG00000013441,ENSG00000105186,ENSG00000106993,ENSG00000112079,ENSG00000113240,ENSG00000165572,ENSG00000168564,ENSG00000181704,ENSG00000187866,ENSG00000197062,ENSG00000205808,ENSG00000275111/ENSG00000013441,ENSG00000112079,ENSG00000165572,ENSG00000176749,ENSG00000197062/ENSG00000112079,ENSG00000113240/ENSG00000155868/ENSG00000176749/ENSG00000119231/ENSG00000181704/ENSG00000198783…	1.949/2.218/2.699/4.203/3.733/2.594/2.411/1.382/1.188	0/0/0.007/0.014/0.022/0.068/0.081/0.212/0.251	1.0735161877044e-07/0.000857708572043499/0.0262229582179171/0.0386206236918314/0.0492302218128534/0.125244301084701/0.12794497990181/0.29142545788864/0.307119472815201	-0.562319	4.31235e-10	-0.546604	1.61879e-09	-0.397901	2.62945e-05	0.90956	0.42807	0.77901	0.5894	0.92143	0	0	0	0	0	hsa05030 (Cocaine addiction)	P00027 (Heterotrimeric G-protein signaling pathway-Gq alpha and Go alpha mediated pathway)	R-HSA-3215018 (Processing and activation of SUMO)	WP411 (mRNA Processing)	GO:0008380 (RNA splicing)
F:ME19	powderblue	19	ENSG00000101040;ENSG00000114982;ENSG00000120253;ENSG00000120458;ENSG00000133422;ENSG00000147174;ENSG00000149346;ENSG00000156502;ENSG00000162757;ENSG00000169359;ENSG00000182700;ENSG00000186017;ENSG00000186416;ENSG00000198799;ENSG00000261087;ENSG00000261326;ENSG00000261799;ENSG00000272335;ENSG00000275764	ZMYND8;KANSL3;NUP43;MSANTD2;MORC2;ACRC;SLX4IP;SUPV3L1;C1orf74;SLC33A1;IGIP;ZNF566;NKRF;LRIG2;KB-1460A1.5;LINC01355;RP11-283I3.6;RP11-53O19.3;RP11-582E3.6	0.350959	-1.80908	0.000267094	0.0034865	-0.298806	0.836427	0.93778	miR-124-3p/miR-92a-3p/miR-320b/miR-4286/miR-550a-3p/miR-532-3p	ENSG00000120253,ENSG00000149346,ENSG00000169359,ENSG00000182700,ENSG00000186416/ENSG00000120253,ENSG00000169359,ENSG00000186017/ENSG00000186017,ENSG00000198799/ENSG00000120253/ENSG00000169359/ENSG00000198799	1.878/2.591/2.765/3.296/2.89/2.69	0.001/0.001/0.006/0.034/0.051/0.062	0.00640319185631846/0.00641153759756839/0.0227175554435406/0.0947149462869128/0.112724267484413/0.114183267006575	-0.489496	1.16394e-07	-0.473541	3.36297e-07	-0.222103	0.0227768	0.27082	0.57561	0.011431	0.48136	0.1914	0	0	0	0	0	hsa00604 (Glycosphingolipid biosynthesis)	NA (NA)	R-HSA-425397 (Transport of vitamins, nucleosides, and related molecules)	WP1984 (Integrated Breast Cancer Pathway)	GO:0043954 (cellular component maintenance)
F:ME133	lightsteelblue	50	ENSG00000006712;ENSG00000024862;ENSG00000040633;ENSG00000100711;ENSG00000101363;ENSG00000110944;ENSG00000114383;ENSG00000115325;ENSG00000117318;ENSG00000119392;ENSG00000124217;ENSG00000124688;ENSG00000125245;ENSG00000126883;ENSG00000129749;ENSG00000130772;ENSG00000134882;ENSG00000135363;ENSG00000137656;ENSG00000152804;ENSG00000160633;ENSG00000163154;ENSG00000164011;ENSG00000164967;ENSG00000166133…	PAF1;CCDC28A;PHF23;ZFYVE21;MANBAL;IL23A;TUSC2;DOK1;ID3;GLE1;MOCS3;MAD2L1BP;GPR18;NUP214;CHRNA10;MED18;UBAC2;LMO2;BUD13;HHEX;SAFB;TNFAIP8L2;ZNF691;RPP25L;RPUSD2;ZSWIM1;RNF34;ZNF408;EIF1AD;C11orf68;ORAI3;CENPBD1;TMEM11;SEPHS2;FAM43A;CIDECP;BLOC1S3;PRR3;AC002467.7;C22orf39;LINC00847;ZCCHC3;CTA-963H5.5;FNTB;RP11-55K13.1;SNAI3-AS1;RP11-290F24.6;RP11-373D23.3;NOL12;ENSG00000284602	0.326033	-2.17946	0.000351124	0.0034865	-0.364775	0.0171047	0.127335	miR-124-3p/miR-92a-3p/miR-532-3p/miR-1270/miR-181d-5p/miR-320b	ENSG00000024862,ENSG00000040633,ENSG00000100711,ENSG00000101363,ENSG00000114383,ENSG00000115325,ENSG00000117318,ENSG00000130772,ENSG00000134882,ENSG00000152804,ENSG00000160633,ENSG00000164967,ENSG00000175376,ENSG00000175573,ENSG00000175938/ENSG00000024862,ENSG00000100711,ENSG00000101363,ENSG00000114383,ENSG00000126883,ENSG00000175376,ENSG00000247315/ENSG00000040633,ENSG00000247315/ENSG00000114383…	2.009/2.471/2.415/2.51/1.298/1.104	0/0/0.012/0.073/0.224/0.265	2.20252226169183e-09/6.16300042609864e-06/0.04361917224342/0.199680759236175/0.486381152152449/0.486381152152449	-0.52187	1.13638e-08	-0.479393	2.29318e-07	-0.306638	0.00146511	0.28389	0.39406	0.84899	0.2567	0.9549	0	0	0	0	0	hsa00450 (Selenocompound metabolism)	P00044 (Nicotinic acetylcholine receptor signaling pathway)	R-HSA-2514859 (Inactivation, recovery and regulation of the phototransduction cascade)	WP2853 (Endoderm Differentiation)	GO:0030101 (natural killer cell activation)
F:ME131	palevioletred3	59	ENSG00000002919;ENSG00000059728;ENSG00000077420;ENSG00000108424;ENSG00000108788;ENSG00000108932;ENSG00000109133;ENSG00000109220;ENSG00000113369;ENSG00000119820;ENSG00000120696;ENSG00000123700;ENSG00000125735;ENSG00000126262;ENSG00000132825;ENSG00000133794;ENSG00000135083;ENSG00000135828;ENSG00000137275;ENSG00000142961;ENSG00000145860;ENSG00000146426;ENSG00000149573;ENSG00000152213;ENSG00000152684…	SNX11;MXD1;APBB1IP;KPNB1;MLX;SLC16A6;TMEM33;CHIC2;ARRDC3;YIPF4;KBTBD7;KCNJ2;TNFSF14;FFAR2;PPP1R3D;ARNTL;CCNJL;RNASEL;RIPK1;MOB3C;RNF145;TIAM2;MPZL2;ARL11;PELO;TMEM55A;SLA;KCNJ15;EYA3;IFNGR2;GPBP1L1;MPZL3;ARHGAP25;RPP14;NDEL1;CCNDBP1;CRK;CEP19;PITPNA;KCNE3;C18orf32;ZBTB18;P2RY13;CHST15;IST1;KCTD21;CSF2RA;ZNF652;HSPA1B;HSPA1L;AC009506.1;AC079630.4;RP4-666F24.3;SUMO1P1;ZNF436-AS1;CAPN10-AS1;CARD8-AS…	0.31761	-2.12634	0.000375516	0.0034865	0.349775	0.163843	0.406574	miR-124-3p/miR-92a-3p/miR-181d-5p/miR-4286/miR-550a-3p/miR-320b/miR-532-3p	ENSG00000002919,ENSG00000059728,ENSG00000108424,ENSG00000108932,ENSG00000109133,ENSG00000113369,ENSG00000132825,ENSG00000145860,ENSG00000160588,ENSG00000166946,ENSG00000175538,ENSG00000177576,ENSG00000179456,ENSG00000204388/ENSG00000109133,ENSG00000113369,ENSG00000145860,ENSG00000159592,ENSG00000163684,ENSG00000167193,ENSG00000179456/ENSG00000108932,ENSG00000113369,ENSG00000179456,ENSG00000182149…	1.775/2.306/2.742/2.856/2.45/1.632/1.556	0/0/0/0.005/0.011/0.051/0.178	2.69389139908638e-07/1.98211985778323e-05/4.38578945142033e-05/0.0139846479916196/0.0246073087940679/0.0938266159131663/0.280389679786631	-0.446174	1.83966e-06	-0.417568	9.34538e-06	-0.293476	0.00237809	0.55069	0.38314	0.90594	0.59599	0.51116	0	0	0	0	0	hsa05164 (Influenza A)	P00006 (Apoptosis signaling pathway)	R-HSA-1296065 (Inwardly rectifying K+ channels)	WP2359 (Parkin-Ubiquitin Proteasomal System pathway)	GO:0045088 (regulation of innate immune response)
F:ME87	thistle1	60	ENSG00000073756;ENSG00000087074;ENSG00000099985;ENSG00000100221;ENSG00000112149;ENSG00000113070;ENSG00000118515;ENSG00000120129;ENSG00000120738;ENSG00000122557;ENSG00000122877;ENSG00000123689;ENSG00000124882;ENSG00000125740;ENSG00000127528;ENSG00000128016;ENSG00000130066;ENSG00000135821;ENSG00000138670;ENSG00000139318;ENSG00000140379;ENSG00000141682;ENSG00000144655;ENSG00000145632;ENSG00000148842…	PTGS2;PPP1R15A;OSM;JOSD1;CD83;HBEGF;SGK1;DUSP1;EGR1;HERPUD2;EGR2;G0S2;EREG;FOSB;KLF2;ZFP36;SAT1;GLUL;RASGEF1B;DUSP6;BCL2A1;PMAIP1;CSRNP1;PLK2;CNNM2;NR4A2;DUSP2;BTG2;IER2;CXCL1;CXCL8;FOS;JUNB;TRIB1;PLK3;SFN;JUN;ZFAND2A;EGR3;TTC32;SOCS3;MAFF;MIR22HG;HEXIM1;MIR27A;MIR23A;BTBD19;LINC01353;AC006978.6;RP11-981P6.1;CTD-3247F14.2;RP11-1024P17.1;MIR24-2;LINC00936;RP1-111C20.4;RP11-434H6.6;Metazoa_SRP;RP11…	0.31758	1.89311	0.00054252	0.0034865	0.347174	0.230508	0.494268	miR-124-3p/miR-92a-3p/miR-23a-5p/miR-320b/miR-4286/miR-532-3p	ENSG00000073756,ENSG00000087074,ENSG00000122557,ENSG00000122877,ENSG00000130066,ENSG00000135821,ENSG00000140379,ENSG00000144655,ENSG00000145632,ENSG00000148842,ENSG00000153234,ENSG00000158050,ENSG00000169429,ENSG00000175793,ENSG00000179388,ENSG00000183891,ENSG00000185022/ENSG00000100221,ENSG00000122557,ENSG00000145632,ENSG00000173334/ENSG00000173334/ENSG00000135821,ENSG00000173334/ENSG00000135821…	1.952/1.729/3.062/1.615/2.146/1.54	0/0.004/0.043/0.053/0.103/0.181	3.99445300246748e-10/0.023401060260254/0.145097898982238/0.145097898982238/0.22713422904914/0.332225838171203	0.440484	2.57215e-06	0.435607	3.41187e-06	0.273601	0.00474113	0.5861	0.16169	0.025323	0.96952	0.30642	15	2	16	18	57	hsa04657 (IL-17 signaling pathway)	P06959 (CCKR signaling map)	R-HSA-6785807 (Interleukin-4 and Interleukin-13 signaling)	WP2431 (Spinal Cord Injury)	GO:0046683 (response to organophosphorus)
F:ME134	plum3	46	ENSG00000060642;ENSG00000085644;ENSG00000100804;ENSG00000105088;ENSG00000105204;ENSG00000105327;ENSG00000105617;ENSG00000105732;ENSG00000106003;ENSG00000108604;ENSG00000116863;ENSG00000119559;ENSG00000124160;ENSG00000125449;ENSG00000126882;ENSG00000130669;ENSG00000132005;ENSG00000132801;ENSG00000135482;ENSG00000138107;ENSG00000138172;ENSG00000141570;ENSG00000145945;ENSG00000149257;ENSG00000154370…	PIGV;ZNF213;PSMB5;OLFM2;DYRK1B;BBC3;LENG1;ZNF574;LFNG;SMARCD2;ADPRHL2;C19orf25;NCOA5;ARMC7;FAM78A;PAK4;RFX1;ZSWIM3;ZC3H10;ACTR1A;CALHM2;CBX8;FAM50B;SERPINH1;TRIM11;RNF25;DUSP7;CITED2;HPS6;SPRYD3;KCTD5;PWWP2B;FAM222B;ESRRA;DOLK;WDR25;FARSA;INTS5;SNAI3;ZBTB3;ZNF696;NF2;GIMAP1;COG8;B3GALT4;C9orf69	0.291882	-2.01839	0.000342583	0.0034865	-0.339709	0.0570516	0.212359	miR-124-3p/miR-92a-3p/miR-4286/miR-532-3p/miR-23a-5p/miR-1270/miR-550a-3p/miR-320b	ENSG00000105204,ENSG00000108604,ENSG00000124160,ENSG00000126882,ENSG00000132005,ENSG00000149257,ENSG00000164442,ENSG00000167778,ENSG00000173065,ENSG00000186575/ENSG00000108604,ENSG00000132005,ENSG00000166189,ENSG00000167977,ENSG00000186575/ENSG00000105732,ENSG00000108604/ENSG00000108604,ENSG00000164442/ENSG00000173065/ENSG00000164442/ENSG00000108604/ENSG00000119559	1.687/2.218/3.105/2.498/3.328/2.594/2.006/1.188	0/0/0.003/0.011/0.033/0.068/0.12/0.251	7.6040287323597e-05/0.000857708572043499/0.0118360186904439/0.0289782637328903/0.0734395450081846/0.125244301084701/0.188037755537049/0.345509406917101	-0.416452	9.92778e-06	-0.39224	3.49966e-05	-0.193241	0.0482582	0.94635	0.30367	0.79755	0.91791	0.57248	0	0	0	0	0	hsa04390 (Hippo signaling pathway)	P00045 (Notch signaling pathway)	R-HSA-8939243 (RUNX1 interacts with co-factors whose precise effect on RUNX1 targets is not known)	WP4534 (Mechanoregulation and pathology of YAP/TAZ via Hippo and non-Hippo mechanisms)	GO:0070085 (glycosylation)
F:ME68	tan	195	ENSG00000001629;ENSG00000004700;ENSG00000008311;ENSG00000008869;ENSG00000011523;ENSG00000023516;ENSG00000030066;ENSG00000033867;ENSG00000040199;ENSG00000047365;ENSG00000048405;ENSG00000051825;ENSG00000058056;ENSG00000064115;ENSG00000064313;ENSG00000064651;ENSG00000065060;ENSG00000066294;ENSG00000066933;ENSG00000069667;ENSG00000072736;ENSG00000075711;ENSG00000076770;ENSG00000078177;ENSG00000078674…	ANKIB1;RECQL;AASS;HEATR5B;CEP68;AKAP11;NUP160;SLC4A7;PHLPP2;ARAP2;ZNF800;MPHOSPH9;USP13;TM7SF3;TAF2;SLC12A2;UHRF1BP1;CD84;MYO9A;RORA;NFATC3;DLG1;MBNL3;N4BP2;PCM1;AP4E1;XPO1;DOPEY1;HACE1;TXLNG;KLHL42;TRPM7;SEC22C;SYDE2;GNPNAT1;ARHGAP5;ATP11C;ZC3H12B;EEA1;KATNAL1;LONP2;RPGRIP1L;FZD3;SLC39A14;CDK6;ZC3HAV1;FSD1L;FUBP3;FAM208B;USP46;NCOA7;PHACTR2;MAN2A1;NNT;LNPEP;ACVR2B;ITGA4;CLIP4;DCAF17;SOS1;THADA;C…	0.262659	1.73491	0.00800445	0.0268149	0.291774	0.895742	0.983848	miR-124-3p/miR-92a-3p/miR-320b/miR-1270/miR-181d-5p/miR-550a-3p/miR-532-3p/miR-5585-3p	ENSG00000115904,ENSG00000134852,ENSG00000001629,ENSG00000048405,ENSG00000051825,ENSG00000069667,ENSG00000078177,ENSG00000086712,ENSG00000093183,ENSG00000102189,ENSG00000102910,ENSG00000105939,ENSG00000111912,ENSG00000112419,ENSG00000112893,ENSG00000112992,ENSG00000115827,ENSG00000118200,ENSG00000119138,ENSG00000125384,ENSG00000129317,ENSG00000132953,ENSG00000135913,ENSG00000136925,ENSG00000139133…	1.629/1.997/1.941/2.536/1.729/1.948/1.747/2.289	0/0/0/0/0/0.002/0.004/0.091	1.1103423718376e-17/3.27837944537022e-10/1.2965591570395e-05/0.000558052548078338/0.00109380759721955/0.00363989947353111/0.0065123492563951/0.125716470869437	0.34531	0.00030898	0.287621	0.00292902	0.205008	0.0359138	0.63495	0.92739	0.94781	0.48242	0.90013	0	0	0	0	0	hsa04390 (Hippo signaling pathway)	P00002 (Alpha adrenergic receptor signaling pathway)	R-HSA-400253 (Circadian Clock)	WP3998 (Prader-Willi and Angelman Syndrome)	GO:0006814 (sodium ion transport)
F:ME21	lavenderblush3	59	ENSG00000066379;ENSG00000070761;ENSG00000077721;ENSG00000095485;ENSG00000100483;ENSG00000108651;ENSG00000115289;ENSG00000123297;ENSG00000125352;ENSG00000125871;ENSG00000127125;ENSG00000129235;ENSG00000130770;ENSG00000131351;ENSG00000138175;ENSG00000141378;ENSG00000141741;ENSG00000143443;ENSG00000144136;ENSG00000147789;ENSG00000151093;ENSG00000151465;ENSG00000152464;ENSG00000156928;ENSG00000158864…	ZNRD1;CFAP20;UBE2A;CWF19L1;VCPKMT;UTP6;PCGF1;TSFM;RNF113A;MGME1;PPCS;TXNDC17;ATPIF1;HAUS8;ARL3;PTRH2;MIEN1;C1orf56;SLC20A1;ZNF7;OXSM;CDC123;RPP38;MALSU1;NDUFS2;ATP5G1;MED8;UBE2Q1;SCNM1;LRR1;NUDT5;C16orf45;MPLKIP;RNF181;RP11-423H2.1;EXOSC1;CHCHD1;FAM192A;DLGAP1-AS1;IMP3;LINC00324;C14orf119;GDPGP1;SNRNP35;TRAPPC2;TRAPPC4;ZSCAN16;SFT2D1;PSMB8-AS1;C12orf73;NUP50-AS1;ARPC1A;TMEM199;MRPL46;SNHG19;LL21N…	0.255576	-2.14462	0.000374672	0.0034865	-0.349943	0.0845283	0.269686	miR-124-3p/miR-181d-5p/miR-532-3p/miR-92a-3p	ENSG00000066379,ENSG00000070761,ENSG00000127125,ENSG00000129235,ENSG00000130770,ENSG00000141378,ENSG00000141741,ENSG00000165501,ENSG00000166780,ENSG00000172775,ENSG00000177971/ENSG00000144136,ENSG00000196655,ENSG00000241685/ENSG00000151093,ENSG00000196655/ENSG00000127125,ENSG00000144136	1.534/2.232/2.25/1.053	0/0.003/0.016/0.133	9.03016417555768e-05/0.0174256034225797/0.0581894576117081/0.366562033139258	-0.470145	4.18627e-07	-0.414316	1.11392e-05	-0.329237	0.000604863	0.41683	0.80458	0.48791	0.33625	0.4816	0	0	0	0	0	hsa03008 (Ribosome biogenesis in eukaryotes)	P00023 (General transcription regulation)	R-HSA-6791226 (Major pathway of rRNA processing in the nucleolus and cytosol)	WP111 (Electron Transport Chain (OXPHOS system in mitochondria))	GO:0140053 (mitochondrial gene expression)
F:ME119	skyblue1	52	ENSG00000005812;ENSG00000006715;ENSG00000036054;ENSG00000076053;ENSG00000080815;ENSG00000084073;ENSG00000084733;ENSG00000086300;ENSG00000087502;ENSG00000095139;ENSG00000101343;ENSG00000101966;ENSG00000104343;ENSG00000109270;ENSG00000109458;ENSG00000113595;ENSG00000115339;ENSG00000115520;ENSG00000115762;ENSG00000116044;ENSG00000116489;ENSG00000117222;ENSG00000117505;ENSG00000118496;ENSG00000118518…	FBXL3;VPS41;TBC1D23;RBM7;PSEN1;ZMPSTE24;RAB10;SNX10;ERGIC2;ARCN1;CRNKL1;XIAP;UBE2W;LAMTOR3;GAB1;TRIM23;GALNT3;COQ10B;PLEKHB2;NFE2L2;CAPZA1;RBBP5;DR1;FBXO30;RNF146;RAB14;VPS4B;SMNDC1;TRMT1L;LRIF1;RAB22A;STAU1;HEATR5A;THAP1;PPM1B;RAB1A;NAB1;BTBD10;VPS37A;NPTN;RSPRY1;BROX;RYBP;SLU7;PAFAH1B2;CRLF3;THAP5;RMI1;ZBTB6;TOP1;PPP1CB;ZNF350	0.239632	-1.8598	0.000362845	0.0034865	0.316914	0.557462	0.811956	miR-124-3p/miR-320b/miR-92a-3p/miR-1270/miR-550a-3p/miR-532-3p/miR-181d-5p	ENSG00000104343,ENSG00000109270,ENSG00000116489,ENSG00000121486,ENSG00000124209,ENSG00000129493,ENSG00000138032,ENSG00000138386,ENSG00000168092,ENSG00000186130/ENSG00000104343,ENSG00000124209,ENSG00000162819/ENSG00000104343,ENSG00000138032,ENSG00000138386/ENSG00000186130/ENSG00000168092/ENSG00000104343/ENSG00000138386	1.565/2.164/1.585/2.471/1.883/1.683/1.259	0/0.004/0.02/0.077/0.134/0.162/0.236	0.000240299116513931/0.023205598689139/0.0745238457588395/0.211442759081022/0.295233170039931/0.296134191598381/0.370999772298002	-0.300443	0.00184538	-0.281729	0.00359676	-0.162817	0.0970159	0.49098	0.41055	0.037415	0.18259	0.24	0	0	1	0	2	hsa04144 (Endocytosis)	P00017 (DNA replication)	R-HSA-8873719 (RAB geranylgeranylation)	WP3594 (Circadian rhythm related genes)	GO:0016197 (endosomal transport)
F:ME132	skyblue2	53	ENSG00000010539;ENSG00000064763;ENSG00000064999;ENSG00000078902;ENSG00000100246;ENSG00000103150;ENSG00000103343;ENSG00000104221;ENSG00000116584;ENSG00000119669;ENSG00000122733;ENSG00000124444;ENSG00000129696;ENSG00000132604;ENSG00000133884;ENSG00000134198;ENSG00000136715;ENSG00000137094;ENSG00000140830;ENSG00000143409;ENSG00000146859;ENSG00000152518;ENSG00000157514;ENSG00000161638;ENSG00000162413…	ZNF200;FAR2;ANKS1A;TOLLIP;DNAL4;MLYCD;ZNF174;BRF2;ARHGEF2;IRF2BPL;PHF24;ZNF576;TTI2;TERF2;DPF2;TSPAN2;SAP130;DNAJB5;TXNL4B;FAM63A;TMEM140;ZFP36L2;TSC22D3;ITGA5;KLHL21;NUAK2;MID1IP1;ZFYVE1;FRAT1;NAB2;ZNF526;VPS37C;TMEM43;SPATA5L1;SH3BP5L;IP6K1;GCC1;TRAPPC5;FRAT2;TMEM252;TMEM216;SOWAHD;IER5L;MPZL1;RUNDC1;DCAF12;PPP1R10;PPME1;LINC00957;RP11-7F17.5;RP11-7F17.3;TXNIP;NATD1	0.233293	-2.00282	0.000367918	0.0034865	0.330197	0.378746	0.667788	miR-124-3p/miR-320b/miR-532-3p/miR-181d-5p/miR-4286/miR-550a-3p/miR-92a-3p	ENSG00000064999,ENSG00000100246,ENSG00000137094,ENSG00000152518,ENSG00000162413,ENSG00000165175,ENSG00000167987,ENSG00000170876,ENSG00000198876,ENSG00000265972/ENSG00000157514,ENSG00000165175,ENSG00000170876,ENSG00000265972/ENSG00000157514,ENSG00000265972/ENSG00000152518,ENSG00000163545/ENSG00000157514/ENSG00000265972/ENSG00000198876	1.545/2.432/2.357/1.933/2.27/1.864/0.467	0/0/0.014/0.031/0.093/0.137/0.449	0.000286223086489688/0.00184499739950195/0.0506743523545118/0.0840461681643071/0.205113810592233/0.250427318701699/0.706024290523656	-0.394087	3.18978e-05	-0.358322	0.000174606	-0.216966	0.026204	0.42283	0.91387	0.72842	0.94174	0.2863	0	0	0	0	0	hsa04146 (Peroxisome)	P00023 (General transcription regulation)	R-HSA-196299 (Beta-catenin phosphorylation cascade)	WP4336 (ncRNAs involved in Wnt signaling in hepatocellular carcinoma)	GO:0017145 (stem cell division)
F:ME91	sienna4	36	ENSG00000004139;ENSG00000004975;ENSG00000089094;ENSG00000090554;ENSG00000100564;ENSG00000103423;ENSG00000108963;ENSG00000110025;ENSG00000116151;ENSG00000130684;ENSG00000132600;ENSG00000135722;ENSG00000137496;ENSG00000138031;ENSG00000139625;ENSG00000140688;ENSG00000142453;ENSG00000160613;ENSG00000163013;ENSG00000167962;ENSG00000168488;ENSG00000168970;ENSG00000178199;ENSG00000178252;ENSG00000183458…	SARM1;DVL2;KDM2B;FLT3LG;PIGH;DNAJA3;DPH1;SNX15;MORN1;ZNF337;PRMT7;FBXL8;IL18BP;ADCY3;MAP3K12;C16orf58;CARM1;PCSK7;FBXO41;ZNF598;ATXN2L;JMJD7-PLA2G4B;ZC3H12D;WDR6;RP11-958N24.1;PI4KAP2;VMAC;ZNF512B;MSTO2P;TP73-AS1;RP11-122K13.12;DUSP8P5;MICAL3;PKD1P6;BAHCC1;CTC-429P9.5	0.231819	1.69837	0.00913377	0.027995	-0.31158	0.29754	0.577832	miR-124-3p/miR-320b/miR-4286/miR-532-3p/miR-92a-3p	ENSG00000100564,ENSG00000138031,ENSG00000142453,ENSG00000163013,ENSG00000168488,ENSG00000178252,ENSG00000196700/ENSG00000168488,ENSG00000178252/ENSG00000196700/ENSG00000168488/ENSG00000167962	1.576/2.126/2.657/2.05/0.854	0/0.021/0.064/0.115/0.333	0.00388629248493825/0.117184732608234/0.2357077168575/0.315613981872354/0.732630999027477	0.496928	6.96855e-08	0.440801	2.52491e-06	0.330167	0.000582386	0.61924	0.1186	0.39905	0.13024	0.615	0	0	0	0	0	hsa04913 (Ovarian steroidogenesis)	P00004 (Alzheimer disease-presenilin pathway)	R-HSA-3214858 (RMTs methylate histone arginines)	WP3892 (Development of pulmonary dendritic cells and macrophage subsets)	GO:0018195 (peptidyl-arginine modification)
F:ME128	thistle	45	ENSG00000003756;ENSG00000068745;ENSG00000072849;ENSG00000088356;ENSG00000101146;ENSG00000108799;ENSG00000112855;ENSG00000112983;ENSG00000115594;ENSG00000116350;ENSG00000124659;ENSG00000141096;ENSG00000142046;ENSG00000145428;ENSG00000156711;ENSG00000159556;ENSG00000160679;ENSG00000161217;ENSG00000161920;ENSG00000175003;ENSG00000180953;ENSG00000186529;ENSG00000196338;ENSG00000196668;ENSG00000204599…	RBM5;IP6K2;DERL2;PDRG1;RAE1;EZH1;HARS2;BRD8;IL1R1;SRSF4;TBCC;DPEP3;TMEM91;RNF175;MAPK13;ISL2;CHTOP;PCYT1A;MED11;SLC22A1;ST20;CYP4F3;NLGN3;LINC00173;TRIM39;CNEP1R1;HCG27;FGFR1OP;APTR;AC074289.1;RP5-1115A15.1;AC012146.7;RP11-46F15.2;RP11-16E12.1;RP13-516M14.1;RP11-960L18.1;MIR142;RP3-508I15.21;CWC25;RP11-670E13.6;MIR223;RP11-50I19.2;CTC-490E21.11;RP11-483E17.1;ENSG00000284930	0.22941	-2.08575	0.000333	0.0034865	-0.401018	0.00941423	0.10969	miR-124-3p/miR-181d-5p/miR-4286/miR-92a-3p	ENSG00000003756,ENSG00000068745,ENSG00000072849,ENSG00000116350,ENSG00000159556,ENSG00000161920,ENSG00000213066/ENSG00000072849,ENSG00000205423/ENSG00000068745/ENSG00000108799,ENSG00000205423	1.352/2.097/2.433/1.324	0.001/0.021/0.076/0.083	0.0119195035663952/0.113850415076155/0.228983841550035/0.228983841550035	-0.439754	2.68407e-06	-0.411154	1.31897e-05	-0.306389	0.00147894	0.18527	0.79336	0.21891	0.76345	0.78481	0	1	0	0	0	hsa04750 (Inflammatory mediator regulation of TRP channels)	P05918 (p38 MAPK pathway)	R-HSA-72203 (Processing of Capped Intron-Containing Pre-mRNA)	WP411 (mRNA Processing)	GO:0016049 (cell growth)
F:ME15	lightblue4	32	ENSG00000052802;ENSG00000100601;ENSG00000105829;ENSG00000107371;ENSG00000112029;ENSG00000115998;ENSG00000123545;ENSG00000125629;ENSG00000127989;ENSG00000132313;ENSG00000132467;ENSG00000136897;ENSG00000142065;ENSG00000143633;ENSG00000144827;ENSG00000145723;ENSG00000153140;ENSG00000153879;ENSG00000155621;ENSG00000163026;ENSG00000168301;ENSG00000169490;ENSG00000171806;ENSG00000179144;ENSG00000186272…	MSMO1;ALKBH1;BET1;EXOSC3;FBXO5;C2orf42;NDUFAF4;INSIG2;MTERF1;MRPL35;UTP3;MRPL50;ZFP14;C1orf131;ABHD10;GIN1;CETN3;CEBPG;C9orf85;WDCP;KCTD6;TM2D2;METTL18;GIMAP7;ZNF17;BCDIN3D;ZNF383;ZNF766;HYLS1;FAM200A;YAE1D1;AP001372.2	0.225349	-1.89383	0.000296209	0.0034865	-0.302826	0.715432	0.872757	miR-124-3p/miR-320b	ENSG00000052802,ENSG00000105829,ENSG00000115998,ENSG00000136897,ENSG00000143633,ENSG00000155621,ENSG00000169490/ENSG00000105829	1.693/1.551	0/0.182	0.00178787905007308/1	-0.428458	5.12167e-06	-0.394187	3.17366e-05	-0.215022	0.0276105	0.33041	0.42078	0.22377	0.18384	0.35226	0	0	0	0	0	hsa00100 (Steroid biosynthesis)	NA (NA)	R-HSA-5389840 (Mitochondrial translation elongation)	WP2895 (Differentiation of white and brown adipocyte)	GO:0140053 (mitochondrial gene expression)
F:ME30	salmon1	28	ENSG00000004961;ENSG00000037241;ENSG00000100554;ENSG00000101882;ENSG00000105171;ENSG00000108953;ENSG00000119899;ENSG00000121067;ENSG00000122687;ENSG00000128245;ENSG00000133574;ENSG00000136240;ENSG00000140259;ENSG00000143149;ENSG00000143612;ENSG00000144867;ENSG00000154781;ENSG00000161980;ENSG00000162396;ENSG00000163528;ENSG00000164117;ENSG00000167447;ENSG00000172315;ENSG00000183520;ENSG00000187626…	HCCS;RPL26L1;ATP6V1D;NKAP;POP4;YWHAE;SLC17A5;SPOP;MRM2;YWHAH;GIMAP4;KDELR2;MFAP1;ALDH9A1;C1orf43;SRPRB;CCDC174;POLR3K;PARS2;CHCHD4;FBXO8;SMG8;TP53RK;UTP11;ZKSCAN4;TSPYL1;ZNF823;SYS1	0.217488	-1.80814	0.000286779	0.0034865	0.41073	0.0476532	0.202989	miR-532-3p/miR-124-3p/miR-92a-3p/miR-550a-3p/miR-320b	ENSG00000121067,ENSG00000189241/ENSG00000100554,ENSG00000108953,ENSG00000164117,ENSG00000167447/ENSG00000108953,ENSG00000189241/ENSG00000100554/ENSG00000128245	2.995/1.267/1.798/2.502/1.684	0.004/0.02/0.039/0.075/0.161	0.0440077501955052/0.112729660830812/0.142325053053481/0.205161595388362/0.355137116619258	-0.412526	1.22597e-05	-0.360489	0.000158393	-0.183894	0.0604023	0.34676	0.41476	0.32854	0.052897	0.4443	0	0	0	1	0	hsa05110 (Vibrio cholerae infection)	P00049 (Parkinson disease)	R-HSA-75035 (Chk1/Chk2(Cds1) mediated inactivation of Cyclin B:Cdk1 complex)	WP706 (Sudden Infant Death Syndrome (SIDS) Susceptibility Pathways)	GO:0006399 (tRNA metabolic process)
F:ME121	skyblue3	81	ENSG00000008294;ENSG00000011198;ENSG00000012048;ENSG00000024048;ENSG00000043462;ENSG00000048392;ENSG00000057657;ENSG00000071967;ENSG00000072401;ENSG00000073711;ENSG00000079950;ENSG00000083223;ENSG00000093000;ENSG00000100505;ENSG00000101577;ENSG00000102755;ENSG00000106829;ENSG00000109381;ENSG00000111707;ENSG00000111802;ENSG00000111913;ENSG00000112242;ENSG00000112304;ENSG00000112308;ENSG00000113532…	SPAG9;ABHD5;BRCA1;UBR2;LCP2;RRM2B;PRDM1;CYBRD1;UBE2D1;PPP2R3A;STX7;ZCCHC6;NUP50;TRIM9;LPIN2;FLT1;TLE4;ELF2;SUDS3;TDP2;FAM65B;E2F3;ACOT13;C6orf62;ST8SIA4;ATP6V1A;SMG7;EXOC8;KDM5B;RUNX2;MOSPD2;IL13RA1;TMEM2;FAM8A1;TLR2;HECW2;APH1B;CCNG2;PPP3CA;TUFT1;MCL1;GPR107;FAM160B1;FLI1;CACUL1;ATP6V1C1;PKNOX1;DISC1;TMEM169;SENP2;KIAA0430;ZNF701;PPM1D;DCP2;MSL2;CTBP2;ZBTB34;HIST1H2BC;RELL1;C11orf54;RABIF;CCDC12…	0.217294	-1.91964	0.000442282	0.0034865	0.301591	0.745132	0.880588	miR-320b/miR-124-3p/miR-92a-3p/miR-181d-5p	ENSG00000124813,ENSG00000181826,ENSG00000186591/ENSG00000011198,ENSG00000101577,ENSG00000116903,ENSG00000124813,ENSG00000138764,ENSG00000162946,ENSG00000186591/ENSG00000011198,ENSG00000116903/ENSG00000138764	1.72/0.765/0.736/0.816	0.013/0.03/0.221/0.336	0.147094276722035/0.167109437861047/0.809840878082194/0.924011995202713	-0.247154	0.0110276	-0.241753	0.0129715	-0.139065	0.157122	0.019318	0.30935	0.48936	0.057546	0.85962	0	0	0	0	0	hsa05323 (Rheumatoid arthritis)	P02739 (De novo pyrimidine deoxyribonucleotide biosynthesis)	R-HSA-4641265 (Repression of WNT target genes)	WP4286 (Genotoxicity pathway)	GO:0032196 (transposition)
F:ME20	blue4	30	ENSG00000007545;ENSG00000091732;ENSG00000100211;ENSG00000128563;ENSG00000131779;ENSG00000141854;ENSG00000142252;ENSG00000167525;ENSG00000180089;ENSG00000188599;ENSG00000196510;ENSG00000214753;ENSG00000226862;ENSG00000240219;ENSG00000240399;ENSG00000256448;ENSG00000260257;ENSG00000260911;ENSG00000268205;ENSG00000268713;ENSG00000269918;ENSG00000269958;ENSG00000270091;ENSG00000271344;ENSG00000271971…	CRAMP1;ZC3HC1;CBY1;PRKRIP1;PEX11B;MISP3;GEMIN7;PROCA1;TMEM86B;NPIPP1;ANAPC7;HNRNPUL2;RP11-569A11.1;RP11-430C7.5;RP1-228P16.1;RP11-809N8.4;RP5-1085F17.3;RP11-196G11.2;CTC-444N24.11;CTC-444N24.8;AF131215.9;RP11-73M18.8;RP11-78O7.2;RP11-274B21.9;CTD-2006H14.2;RP11-140K17.3;RP11-434H6.7;RP11-227G15.10;CTD-2026K11.5;RP11-45A17.2	0.198701	-1.99396	0.000290444	0.0034865	0.399649	0.235518	0.494268	miR-550a-3p/miR-124-3p	ENSG00000196510/ENSG00000131779,ENSG00000196510	2.433/0.505	0.08/0.317	0.876916885329161/1	-0.418906	8.68927e-06	-0.38074	6.15672e-05	-0.27215	0.0049767	0.4974	0.67973	0.61394	0.45115	0.75737	0	0	0	0	0	hsa00565 (Ether lipid metabolism)	NA (NA)	R-HSA-1482788 (Acyl chain remodelling of PC)	WP4536 (Genes related to primary cilium development (based on CRISPR))	GO:0051260 (protein homooligomerization)
F:ME66	orangered4	77	ENSG00000000460;ENSG00000046653;ENSG00000072756;ENSG00000080854;ENSG00000081148;ENSG00000095564;ENSG00000100201;ENSG00000103064;ENSG00000103995;ENSG00000110344;ENSG00000116396;ENSG00000122126;ENSG00000122435;ENSG00000122484;ENSG00000131503;ENSG00000131791;ENSG00000133858;ENSG00000135976;ENSG00000143452;ENSG00000146281;ENSG00000151503;ENSG00000151665;ENSG00000154874;ENSG00000156042;ENSG00000157212…	C1orf112;GPM6B;TRNT1;IGSF9B;IMPG2;BTAF1;DDX17;SLC7A6;CEP152;UBE4A;KCNC4;OCRL;TRMT13;RPAP2;ANKHD1;PRKAB2;ZFC3H1;ANKRD36;HORMAD1;PM20D2;NCAPD3;PIGF;CCDC144B;CFAP70;PAXIP1;PTPDC1;MYSM1;TYW5;TMEM161B;USP49;PCF11;QSOX2;ZNF23;MAT2A;OTUD3;DPY19L2P2;ANKRD36C;ARL10;ALG10B;RP11-111M22.2;ZNF594;ZFP3;JRKL;TRIM52;ZBTB37;RNPC3;PTAR1;ZNF605;ZNF846;FAN1;ZNRD1ASP;C1orf220;DDX47;LTB4R2;AC093642.5;VDAC1P8;NONOP2;PS…	0.196684	1.74388	0.00914196	0.027995	-0.331885	0.0921953	0.287306	miR-124-3p/miR-92a-3p/miR-23a-5p/miR-320b/miR-550a-3p/miR-532-3p/miR-181d-5p	ENSG00000046653,ENSG00000103064,ENSG00000110344,ENSG00000116396,ENSG00000131503,ENSG00000131791,ENSG00000133858,ENSG00000135976,ENSG00000157212,ENSG00000165494,ENSG00000167377,ENSG00000168906,ENSG00000169914,ENSG00000175548,ENSG00000188647,ENSG00000198690,ENSG00000213782/ENSG00000116396,ENSG00000133858,ENSG00000169914,ENSG00000188647/ENSG00000110344/ENSG00000168906,ENSG00000244687/ENSG00000169914…	1.703/1.48/2.813/1.366/1.491/1.29/0.867	0/0.009/0.052/0.075/0.181/0.217/0.311	1.23094017945469e-08/0.0473014340033948/0.189913236290071/0.205835119518576/0.397059234473249/0.397059234473249/0.489365853241085	0.42553	6.03289e-06	0.365339	0.000127033	0.258395	0.00778097	0.45163	0.56831	0.23825	0.52176	0.66358	0	0	0	0	0	hsa00510 (N-Glycan biosynthesis)	P04397 (p53 pathway by glucose deprivation)	R-HSA-72306 (tRNA processing)	WP3877 (Simplified Depiction of MYD88 Distinct Input-Output Pathway)	GO:0006490 (oligosaccharide-lipid intermediate biosynthetic process)
F:ME32	darkgreen	138	ENSG00000004779;ENSG00000005075;ENSG00000011600;ENSG00000048162;ENSG00000054116;ENSG00000055950;ENSG00000068394;ENSG00000090266;ENSG00000091640;ENSG00000092841;ENSG00000099800;ENSG00000100142;ENSG00000101182;ENSG00000102265;ENSG00000103275;ENSG00000103363;ENSG00000103490;ENSG00000104904;ENSG00000105258;ENSG00000105404;ENSG00000105583;ENSG00000105755;ENSG00000106803;ENSG00000107223;ENSG00000108518…	NDUFAB1;POLR2J;TYROBP;NOP16;TRAPPC3;MRPL43;GPKOW;NDUFB2;SPAG7;MYL6;TIMM13;POLR2F;PSMA7;TIMP1;UBE2I;TCEB2;PYCARD;OAZ1;POLR2I;RABAC1;WDR83OS;ETHE1;SEC61B;EDF1;PFN1;MRPL27;NDUFS8;COX6A1;COX7A2;HSPE1;HDHD3;C19orf43;PFDN5;ATP5E;RRP36;ROMO1;HCST;COX6B1;EMG1;UQCR11;NEDD8;DAD1;ARPC1B;PPAN;NDUFA2;COQ3;LAMTOR5;TMEM258;CD63;BLOC1S1;COX5B;DCTN3;HINT2;NDUFA9;VPS33A;SERF2;SRP14;NDUFB10;ANAPC11;NDUFS6;HIGD2A;EB…	0.196007	-2.18192	0.000686342	0.00399869	-0.311581	0.163217	0.406574	miR-320b/miR-124-3p/miR-92a-3p	ENSG00000104904,ENSG00000108518/ENSG00000005075,ENSG00000103490,ENSG00000140264,ENSG00000179085,ENSG00000213619,ENSG00000249915/ENSG00000104904	0.782/0.078/-0.49	0.212/0.421/0.787	1/1/1	-0.279412	0.00389468	-0.206453	0.0345997	-0.161205	0.100414	0.67355	0.36683	0.63948	0.034228	0.26571	9	0	50	4	10	hsa04714 (Thermogenesis)	P00049 (Parkinson disease)	R-HSA-1428517 (The citric acid (TCA) cycle and respiratory electron transport)	WP4396 (Nonalcoholic fatty liver disease)	GO:0006091 (generation of precursor metabolites and energy)
F:ME38	darkslateblue	64	ENSG00000074696;ENSG00000085415;ENSG00000085721;ENSG00000096654;ENSG00000099810;ENSG00000100478;ENSG00000100883;ENSG00000101888;ENSG00000102401;ENSG00000103018;ENSG00000104064;ENSG00000104442;ENSG00000105849;ENSG00000106560;ENSG00000108094;ENSG00000110060;ENSG00000111875;ENSG00000111880;ENSG00000119523;ENSG00000120837;ENSG00000123983;ENSG00000124207;ENSG00000128590;ENSG00000131013;ENSG00000135070…	HACD3;SEH1L;RRN3;ZNF184;MTAP;AP4S1;SRP54;NXT2;ARMCX3;CYB5B;GABPB1;ARMC1;TWISTNB;GIMAP2;CUL2;PUS3;ASF1A;RNGTT;ALG2;NFYB;ACSL3;CSE1L;DNAJB9;PPIL4;ISCA1;MAP3K7;TGS1;SLC39A8;UBE2Q2;ESCO1;DUSP11;METTL14;RPL7L1;PRPS1;UTP23;HAUS6;INIP;AASDHPPT;EIF4E;RNF219;SLC30A6;FAM69A;ZCCHC10;DNAJB4;TFB2M;STK17A;PHAX;ZNF180;TMEM68;GPR183;FAM98B;TVP23B;PDIK1L;UBE2N;ZFP1;ZNF829;BLOC1S5;SMIM15;PNRC2;ZNF136;ZNF420;SACM1L…	0.185524	-1.7626	0.000794597	0.0044365	0.350646	0.177446	0.416384	miR-5585-3p/miR-181d-5p/miR-550a-3p/miR-124-3p	ENSG00000131013/ENSG00000189266,ENSG00000196646/ENSG00000131013/ENSG00000131013,ENSG00000152193,ENSG00000175087,ENSG00000189266	3.403/1.745/1.676/0.441	0.031/0.043/0.163/0.225	0.23717706311995/0.23717706311995/0.596087287334329/0.619971962637629	-0.204872	0.0360404	-0.194792	0.0464534	-0.121981	0.215122	0.02474	0.52863	0.82964	0.58901	0.34041	0	0	0	0	0	hsa03013 (RNA transport)	P05918 (p38 MAPK pathway)	R-HSA-435354 (Zinc transporters)	WP391 (Mitochondrial Gene Expression)	GO:0009451 (RNA modification)
F:ME11	pink4	35	ENSG00000048740;ENSG00000080298;ENSG00000080802;ENSG00000107929;ENSG00000116731;ENSG00000123908;ENSG00000125945;ENSG00000137992;ENSG00000139163;ENSG00000143190;ENSG00000149187;ENSG00000155961;ENSG00000156304;ENSG00000159873;ENSG00000161048;ENSG00000170325;ENSG00000172840;ENSG00000173273;ENSG00000174796;ENSG00000176438;ENSG00000178700;ENSG00000179941;ENSG00000180182;ENSG00000181904;ENSG00000185129…	CELF2;RFX3;CNOT4;LARP4B;PRDM2;AGO2;ZNF436;DBT;ETNK1;POU2F1;CELF1;RAB39B;SCAF4;CCDC117;NAPEPLD;PRDM10;PDP2;TNKS;THAP6;SYNE3;DHFR2;BBS10;MED14;C5orf24;PURA;ARID2;XPNPEP3;ZNF780A;KLHL9;CHAMP1;FBXO48;C5orf51;UTP14C;DCP1A;RP11-44F14.6	0.182143	-1.71533	0.00240746	0.00921714	0.34212	0.314497	0.602036	miR-92a-3p/miR-320b/miR-4286/miR-124-3p/miR-550a-3p/miR-181d-5p	ENSG00000137992,ENSG00000143190,ENSG00000173273,ENSG00000197782/ENSG00000048740,ENSG00000080802,ENSG00000143190/ENSG00000048740,ENSG00000143190/ENSG00000137992,ENSG00000156304,ENSG00000179941,ENSG00000198824/ENSG00000198824/ENSG00000197782	2.268/2.56/3.378/1.044/2.279/1.655	0.001/0.001/0.002/0.039/0.09/0.161	0.00592181081431527/0.0065040399565702/0.0065040399565702/0.10692119904119/0.197709390207091/0.295847269856332	-0.30251	0.00170962	-0.320738	0.000850455	-0.200028	0.04077	0.11967	0.56275	0.43113	0.35936	0.11825	0	0	0	0	0	hsa03018 (RNA degradation)	NA (NA)	R-HSA-429914 (Deadenylation-dependent mRNA decay)	WP3940 (One carbon metabolism and related pathways)	GO:0034248 (regulation of cellular amide metabolic process)
F:ME44	darkviolet	46	ENSG00000003056;ENSG00000028116;ENSG00000070214;ENSG00000080200;ENSG00000082269;ENSG00000085491;ENSG00000104205;ENSG00000104447;ENSG00000107036;ENSG00000111961;ENSG00000112305;ENSG00000114904;ENSG00000115825;ENSG00000128595;ENSG00000129534;ENSG00000134531;ENSG00000136636;ENSG00000138246;ENSG00000138604;ENSG00000139687;ENSG00000144959;ENSG00000147202;ENSG00000147649;ENSG00000148158;ENSG00000151229…	M6PR;VRK2;SLC44A1;CRYBG3;FAM135A;SLC25A24;SGK3;TRPS1;RIC1;SASH1;SMAP1;NEK4;PRKD3;CALU;MIS18BP1;EMP1;KCTD3;DNAJC13;GLCE;RB1;NCEH1;DIAPH2;MTDH;SNX30;SLC2A13;ANKRD50;WWC2;PPARGC1B;TIAM1;AHCYL2;AZI2;SGMS2;PDP1;KIAA1958;REEP3;TRIM44;SOCS6;CERS6;YPEL2;TMTC2;ACBD3;SHTN1;TMEM170B;ITSN1;HACD2;GANC	0.178632	1.64983	0.0144007	0.0393814	0.309852	0.624059	0.853305	miR-124-3p/miR-320b/miR-92a-3p/miR-532-3p	ENSG00000147649,ENSG00000003056,ENSG00000070214,ENSG00000104447,ENSG00000107036,ENSG00000111961,ENSG00000128595,ENSG00000136636,ENSG00000138246,ENSG00000138604,ENSG00000144959,ENSG00000151229,ENSG00000205269,ENSG00000206527/ENSG00000085491,ENSG00000104447,ENSG00000147649,ENSG00000165185/ENSG00000107036,ENSG00000138246,ENSG00000138604/ENSG00000151229	2.024/2.574/1.707/1.805	0/0/0.015/0.144	9.71491923701593e-09/0.00106325446492569/0.0537307900367496/0.396782131487113	0.394051	3.19556e-05	0.342763	0.000344519	0.284895	0.00322261	0.69775	0.092927	0.37134	0.33925	0.39414	0	0	0	0	0	hsa00600 (Sphingolipid metabolism)	P00035 (Interferon-gamma signaling pathway)	R-HSA-1660661 (Sphingolipid de novo biosynthesis)	WP4725 (Sphingolipid Metabolism (general overview))	GO:0006643 (membrane lipid metabolic process)
F:ME8	brown2	96	ENSG00000006194;ENSG00000041988;ENSG00000063854;ENSG00000065057;ENSG00000071859;ENSG00000079616;ENSG00000099949;ENSG00000100092;ENSG00000100124;ENSG00000100395;ENSG00000100429;ENSG00000100983;ENSG00000101189;ENSG00000101246;ENSG00000101365;ENSG00000102030;ENSG00000103245;ENSG00000103496;ENSG00000104129;ENSG00000104886;ENSG00000105254;ENSG00000105379;ENSG00000105393;ENSG00000105518;ENSG00000105618…	ZNF263;THAP3;HAGH;NTHL1;FAM50A;KIF22;LZTR1;SH3BP1;ANKRD54;L3MBTL2;HDAC10;GSS;MRGBP;ARFRP1;IDH3B;NAA10;NARFL;STX4;DNAJC17;PLEKHJ1;TBCB;ETFB;BABAM1;TMEM205;PRPF31;ARRDC2;HSPB1;MRPL2;RRP9;MPV17;AUP1;MTFR1L;NT5C;UROD;METTL26;ERAL1;MUTYH;DNAJB2;DPM2;UQCC2;C12orf10;COMMD4;SAT2;C1orf35;PYCR2;C9orf142;TUT1;B3GAT3;DCUN1D2;UBALD1;PHKG2;PSMG3;ZFAND2B;B4GALT3;CTBP1;COMTD1;FAM96B;SMIM4;SLC50A1;GUSB;ZNF747;ZNF…	0.172051	-2.15175	0.000511247	0.0034865	-0.303687	0.363983	0.667788	miR-532-3p/miR-23a-5p/miR-124-3p/miR-92a-3p	ENSG00000101246,ENSG00000204564/ENSG00000159692/ENSG00000104886,ENSG00000135924,ENSG00000149016,ENSG00000158552,ENSG00000166595,ENSG00000173914,ENSG00000204564/ENSG00000159692	1.763/2.592/0.595/-0.127	0.041/0.068/0.07/0.657	0.255634051197249/0.255634051197249/0.255634051197249/1	-0.307872	0.00139847	-0.278385	0.00403362	-0.194118	0.0472307	0.21408	0.56032	0.57611	0.66472	0.33246	0	0	0	0	0	hsa00860 (Porphyrin and chlorophyll metabolism)	P02746 (Heme biosynthesis)	R-HSA-8868766 (rRNA processing in the mitochondrion)	WP3996 (Ethanol effects on histone modifications)	GO:0031163 (metallo-sulfur cluster assembly)
F:ME100	lightsteelblue1	75	ENSG00000011009;ENSG00000064961;ENSG00000067829;ENSG00000099804;ENSG00000099817;ENSG00000100290;ENSG00000100417;ENSG00000100982;ENSG00000105229;ENSG00000105669;ENSG00000105723;ENSG00000106330;ENSG00000108774;ENSG00000109016;ENSG00000109062;ENSG00000115649;ENSG00000116586;ENSG00000117305;ENSG00000123810;ENSG00000124702;ENSG00000126005;ENSG00000126768;ENSG00000126934;ENSG00000127580;ENSG00000130313…	LYPLA2;HMG20B;IDH3G;CDC34;POLR2E;BIK;PMM1;PCIF1;PIAS4;COPE;GSK3A;MOSPD3;RAB5C;DHRS7B;SLC9A3R1;CNPPD1;LAMTOR2;HMGCL;B9D2;KLHDC3;MMP24-AS1;TIMM17B;MAP2K2;WDR24;PGLS;EMC8;VPS25;CCM2;LIMD2;SIT1;CERS5;SH3BGRL3;PRCC;JTB;GUK1;CTDSP1;ABT1;SURF1;MSRB2;RRAGA;CCAR2;FLYWCH2;PEF1;OTUB1;CDK2AP2;TADA3;POP7;TRMT112;AURKAIP1;SSNA1;BOLA1;MOB2;DDX28;RAB11B;BLOC1S4;C6orf1;RPS19BP1;RINL;LAMTOR4;PCBP2;CXorf40A;DAXX;OX…	0.1643	-1.99876	0.000434028	0.0034865	-0.335846	0.0631934	0.22284	miR-124-3p/miR-92a-3p	ENSG00000139624,ENSG00000146109,ENSG00000148450,ENSG00000173113,ENSG00000185236,ENSG00000186222,ENSG00000186577/ENSG00000105229	0.842/0.12	0.024/0.57	0.260089031635708/1	-0.314598	0.00108124	-0.27328	0.00479237	-0.195799	0.0453125	0.62615	0.74357	0.39957	0.48355	0.76227	0	0	0	0	0	hsa04150 (mTOR signaling pathway)	P00006 (Apoptosis signaling pathway)	R-HSA-166208 (mTORC1-mediated signalling)	WP2447 (Amyotrophic lateral sclerosis (ALS))	GO:0031929 (TOR signaling)
F:ME88	thistle4	29	ENSG00000011243;ENSG00000042832;ENSG00000111786;ENSG00000133026;ENSG00000149761;ENSG00000172780;ENSG00000182473;ENSG00000188277;ENSG00000188603;ENSG00000197114;ENSG00000214176;ENSG00000215375;ENSG00000216490;ENSG00000219200;ENSG00000224975;ENSG00000234290;ENSG00000254995;ENSG00000255026;ENSG00000255857;ENSG00000259642;ENSG00000261884;ENSG00000262766;ENSG00000269858;ENSG00000273599;ENSG00000279159…	AKAP8L;TG;SRSF9;MYH10;NUDT22;RAB43;EXOC7;C15orf62;CLN3;ZGPAT;PLEKHM1P1;MYL5;IFI30;RNASEK;INE1;AC116366.6;STX16-NPEPL1;RP11-326C3.2;PXN-AS1;ST20-AS1;CTC-479C5.12;RP11-196G11.4;EGLN2;RP11-59C5.3;RP3-394A18.1;RP11-463O12.5;RP5-1153D9.5;RP13-516M14.8;DGCR12	0.161103	1.60686	0.011655	0.0332292	-0.374179	0.0533151	0.210124	miR-124-3p/miR-532-3p	ENSG00000011243,ENSG00000182473,ENSG00000269858/ENSG00000111786	0.944/2.267	0.068/0.081	0.44630534629028/0.44630534629028	0.44233	2.30867e-06	0.399878	2.37666e-05	0.268967	0.00553009	0.41556	0.41861	0.42504	0.84478	0.31949	0	0	0	0	0	hsa04810 (Regulation of actin cytoskeleton)	P00030 (Hypoxia response via HIF activation)	R-HSA-5625900 (RHO GTPases activate CIT)	WP3617 (Photodynamic therapy-induced NF-kB survival signaling)	GO:0050905 (neuromuscular process)
F:ME16	sienna3	84	ENSG00000005801;ENSG00000033030;ENSG00000035141;ENSG00000047188;ENSG00000068885;ENSG00000069493;ENSG00000071575;ENSG00000075292;ENSG00000075914;ENSG00000082196;ENSG00000085465;ENSG00000087191;ENSG00000088035;ENSG00000100372;ENSG00000101361;ENSG00000101901;ENSG00000107611;ENSG00000110031;ENSG00000111731;ENSG00000113360;ENSG00000113971;ENSG00000115942;ENSG00000117569;ENSG00000124784;ENSG00000129472…	ZNF195;ZCCHC8;FAM136A;YTHDC2;IFT80;CLEC2D;TRIB2;ZNF638;EXOSC7;C1QTNF3;OVGP1;PSMC5;ALG6;SLC25A17;NOP56;ALG13;CUBN;LPXN;C2CD5;DROSHA;NPHP3;ORC2;PTBP2;RIOK1;RAB2B;PHF10;MCCC2;COQ10A;ERMN;ERP27;CUL4A;ZC3H8;SPAG16;KRBOX4;AK3;TIAL1;UBP1;ABCA5;FAM122B;DONSON;ADCY10P1;C1orf145;RYK;MSS51;ATF7IP2;MIS12;ZNF30;ZRSR2;FAM153A;ZNF131;GLMN;GOLGA8A;ZNF529;ZNF548;ZNF781;ZNF700;ZNF682;ZNF44;ZNF26;METTL10;ZNF204P;PD…	0.161032	-2.01469	0.000445831	0.0034865	-0.349757	0.0188679	0.133069	miR-550a-3p/miR-181d-5p/miR-124-3p	ENSG00000196757/ENSG00000196757/ENSG00000196757	1.404/0.78/-1.218	0.201/0.343/0.957	1/1/1	-0.236989	0.0149279	-0.238805	0.0141539	-0.141088	0.151114	0.1148	0.058144	0.52922	0.97955	0.083337	0	0	0	0	0	hsa03008 (Ribosome biogenesis in eukaryotes)	P02738 (De novo purine biosynthesis)	R-HSA-3781860 (Diseases associated with N-glycosylation of proteins)	WP4521 (Glycosylation and related congenital defects)	GO:0006490 (oligosaccharide-lipid intermediate biosynthetic process)
F:ME82	green	472	ENSG00000001084;ENSG00000004487;ENSG00000004766;ENSG00000005700;ENSG00000008405;ENSG00000008952;ENSG00000009335;ENSG00000010017;ENSG00000012174;ENSG00000015153;ENSG00000018510;ENSG00000023228;ENSG00000023697;ENSG00000025796;ENSG00000026508;ENSG00000028203;ENSG00000029725;ENSG00000031691;ENSG00000035687;ENSG00000035928;ENSG00000039123;ENSG00000040341;ENSG00000042088;ENSG00000048991;ENSG00000049167…	GCLC;KDM1A;VPS50;IBTK;CRY1;SEC62;UBE3C;RANBP9;MBTPS2;YAF2;AGPS;NDUFS1;DERA;SEC63;CD44;VEZT;RABEP1;CENPQ;ADSS;RFC1;SKIV2L2;STAU2;TDP1;R3HDM1;ERCC8;MAPK9;FAM114A2;ZFR;NDC1;BTBD1;IPO5;WDR3;ZC3H15;FAM107B;MTHFD2;THUMPD1;FECH;TRAM1;RRP15;IARS2;KIF2A;NUP133;NUCKS1;MAPK6;EXOC5;EED;LMAN1;BCAP29;TOP2B;TM9SF3;DYNC1I2;UBE2K;PCNP;MEF2C;ZNF510;WDR70;BZW1;GEMIN5;PALB2;LYRM2;ULK2;WBP11;SCAMP1;NFX1;TMED2;ZW10;MT…	0.157258	1.53902	0.0131498	0.03671	0.311034	0.40306	0.683593	miR-124-3p/miR-320b/miR-92a-3p/miR-181d-5p/miR-4516/miR-550a-3p/miR-5585-3p/miR-1270/miR-4286/miR-532-3p	ENSG00000001084,ENSG00000004487,ENSG00000009335,ENSG00000026508,ENSG00000028203,ENSG00000067167,ENSG00000068796,ENSG00000105176,ENSG00000108091,ENSG00000113448,ENSG00000116641,ENSG00000119912,ENSG00000120756,ENSG00000121864,ENSG00000122644,ENSG00000125944,ENSG00000126777,ENSG00000127022,ENSG00000128829,ENSG00000139921,ENSG00000141385,ENSG00000152484,ENSG00000153113,ENSG00000153989,ENSG00000166411…	0.72/1.257/0.765/0.999/1.875/0.776/1.405/0.265/0.083/-0.523	0/0/0.007/0.011/0.137/0.141/0.21/0.521/0.586/0.802	5.16101637687431e-05/0.000982486910825558/0.0251977287556516/0.0300613336296616/0.25886889431714/0.25886889431714/0.329498467955165/0.716180864002187/0.716809040573174/0.882352491520171	0.240293	0.0135457	0.215781	0.0270534	0.139818	0.154865	0.2982	0.79134	0.31799	0.87112	0.87728	0	0	0	0	0	hsa04141 (Protein processing in endoplasmic reticulum)	P02738 (De novo purine biosynthesis)	R-HSA-2500257 (Resolution of Sister Chromatid Cohesion)	WP2853 (Endoderm Differentiation)	GO:0009112 (nucleobase metabolic process)
F:ME112	deeppink1	19	ENSG00000070501;ENSG00000073737;ENSG00000099860;ENSG00000100342;ENSG00000125347;ENSG00000128335;ENSG00000132109;ENSG00000134470;ENSG00000135900;ENSG00000140280;ENSG00000164054;ENSG00000164430;ENSG00000167208;ENSG00000172183;ENSG00000185880;ENSG00000204264;ENSG00000204516;ENSG00000240065;ENSG00000260943	POLB;DHRS9;GADD45B;APOL1;IRF1;APOL2;TRIM21;IL15RA;MRPL44;LYSMD2;SHISA5;MB21D1;SNX20;ISG20;TRIM69;PSMB8;MICB;PSMB9;RP11-476D10.1	0.153237	-1.69794	0.00160256	0.00740495	-0.282172	0.962577	1	miR-92a-3p/miR-532-3p/miR-124-3p	ENSG00000125347,ENSG00000135900/ENSG00000070501/ENSG00000140280	2.186/2.69/0.269	0.019/0.062/0.521	0.206190402162753/0.342549801019726/1	-0.330176	0.000582161	-0.281924	0.00357255	-0.215121	0.0275371	0.52885	0.070533	0.67274	0.035532	0.35463	0	0	0	0	7	hsa03050 (Proteasome)	P00036 (Interleukin signaling pathway)	R-HSA-909733 (Interferon alpha/beta signaling)	WP4197 (The human immune response to tuberculosis)	GO:0034340 (response to type I interferon)
F:ME12	tan4	29	ENSG00000007168;ENSG00000034677;ENSG00000047346;ENSG00000082258;ENSG00000086619;ENSG00000100784;ENSG00000110066;ENSG00000114030;ENSG00000114933;ENSG00000115548;ENSG00000116266;ENSG00000117625;ENSG00000117859;ENSG00000121741;ENSG00000135049;ENSG00000135250;ENSG00000144597;ENSG00000148516;ENSG00000148634;ENSG00000151461;ENSG00000152520;ENSG00000153207;ENSG00000156313;ENSG00000158290;ENSG00000162923…	PAFAH1B1;RNF19A;FAM214A;CCNT2;ERO1B;RPS6KA5;KMT5B;KPNA1;INO80D;KDM3A;STXBP3;RCOR3;OSBPL9;ZMYM2;AGTPBP1;SRPK2;EAF1;ZEB1;HERC4;UPF2;PAN3;AHCTF1;RPGR;CUL4B;WDR26;PAPD4;AP1G1;PCMTD1;PWWP2A	0.149942	-1.63162	0.00691643	0.0237641	0.411259	0.0114602	0.10969	miR-92a-3p/miR-124-3p/miR-181d-5p/miR-320b	ENSG00000156313,ENSG00000166747,ENSG00000170234/ENSG00000100784,ENSG00000144597,ENSG00000166747/ENSG00000170234/ENSG00000166747	2.169/0.944/1.843/1.649	0.004/0.096/0.139/0.167	0.0445519202068137/0.458388461253563/0.458388461253563/0.458388461253563	-0.180302	0.0656891	-0.196679	0.0443337	-0.17927	0.0672746	0.31779	0.021028	0.71249	0.069973	0.11039	0	0	0	0	1	hsa05206 (MicroRNAs in cancer)	P00032 (Insulin/IGF pathway-mitogen activated protein kinase kinase/MAP kinase cascade)	R-HSA-5696394 (DNA Damage Recognition in GG-NER)	WP4352 (Ciliary landscape)	GO:0006997 (nucleus organization)
F:ME34	white	112	ENSG00000008018;ENSG00000008324;ENSG00000034510;ENSG00000060688;ENSG00000060762;ENSG00000069509;ENSG00000083457;ENSG00000090263;ENSG00000100028;ENSG00000100387;ENSG00000100567;ENSG00000100632;ENSG00000101608;ENSG00000106399;ENSG00000106615;ENSG00000109390;ENSG00000111231;ENSG00000111639;ENSG00000112110;ENSG00000112312;ENSG00000113583;ENSG00000114902;ENSG00000115514;ENSG00000117395;ENSG00000117748…	PSMB1;SS18L2;TMSB10;SNRNP40;MPC1;FUNDC1;ITGAE;MRPS33;SNRPD3;RBX1;PSMA3;ERH;MYL12A;RPA3;RHEB;NDUFC1;GPN3;MRPL51;MRPL18;GMNN;C5orf15;SPCS1;TXNDC9;EBNA1BP2;RPA2;MYL12B;MRPS14;PDZD11;SEC22A;CSTA;MTIF3;RPS10;NDUFA1;TTF1;MKKS;ATF4;HAT1;REEP5;COX7B;VIMP;TMEM128;SEC61G;NIP7;PCNA;NASP;POMP;FOPNL;MED6;CDK7;EMC7;ISCU;MED4;PSMB7;PPIL1;MRPL15;NDUFAF1;KYAT3;COX17;GTF2A2;PSMA5;C1orf162;MRPL24;SRP9;SNRPG;LIPT1;M…	0.149855	-1.94378	0.00057241	0.0034865	0.289857	0.925325	0.999948	miR-124-3p/miR-532-3p	ENSG00000008324,ENSG00000106399,ENSG00000134058,ENSG00000143977,ENSG00000155508,ENSG00000184076,ENSG00000189376,ENSG00000204370/ENSG00000134058	0.574/0.915	0.063/0.316	0.69808501089117/1	-0.262227	0.00688577	-0.194804	0.0464396	-0.189657	0.052652	0.55632	0.31659	0.1133	0.72921	0.57328	12	0	177	7	19	hsa04714 (Thermogenesis)	P00023 (General transcription regulation)	R-HSA-5368286 (Mitochondrial translation initiation)	WP111 (Electron Transport Chain (OXPHOS system in mitochondria))	GO:0006414 (translational elongation)
F:ME94	sienna2	23	ENSG00000005381;ENSG00000012223;ENSG00000065618;ENSG00000086548;ENSG00000096006;ENSG00000100448;ENSG00000101425;ENSG00000102837;ENSG00000118113;ENSG00000124469;ENSG00000133063;ENSG00000134827;ENSG00000148346;ENSG00000157554;ENSG00000164047;ENSG00000164821;ENSG00000172232;ENSG00000173391;ENSG00000179869;ENSG00000196415;ENSG00000197561;ENSG00000239839;ENSG00000283646	MPO;LTF;COL17A1;CEACAM6;CRISP3;CTSG;BPI;OLFM4;MMP8;CEACAM8;CHIT1;TCN1;LCN2;ERG;CAMP;DEFA4;AZU1;OLR1;ABCA13;PRTN3;ELANE;DEFA3;RP11-24F11.5	0.147501	1.33248	0.127059	0.202689	0.330068	0.619098	0.853305	NA	NA	NA	NA	NA	0.170043	0.0828794	0.190587	0.0514814	0.00592668	0.952153	0.001013	0.043284	0.1537	0.27077	0.21545	1	0	6	0	22	hsa05202 (Transcriptional misregulation in cancer)	P00004 (Alzheimer disease-presenilin pathway)	R-HSA-6798695 (Neutrophil degranulation)	WP1533 (Vitamin B12 Metabolism)	GO:0036230 (granulocyte activation)
F:ME80	yellow2	24	ENSG00000005436;ENSG00000014824;ENSG00000070950;ENSG00000072274;ENSG00000078403;ENSG00000105926;ENSG00000107077;ENSG00000111615;ENSG00000111752;ENSG00000120802;ENSG00000120910;ENSG00000121350;ENSG00000129187;ENSG00000129675;ENSG00000134283;ENSG00000138018;ENSG00000153944;ENSG00000166260;ENSG00000172175;ENSG00000176225;ENSG00000176623;ENSG00000198838;ENSG00000203668;ENSG00000235532	GCFC2;SLC30A9;RAD18;TFRC;MLLT10;MPP6;KDM4C;KRR1;PHC1;TMPO;PPP3CC;PYROXD1;DCTD;ARHGEF6;PPHLN1;EPT1;MSI2;COX11;MALT1;RTTN;RMDN1;RYR3;CHML;LINC00402	0.147226	1.53648	0.0210117	0.0521401	0.310436	0.710184	0.872757	miR-124-3p/miR-550a-3p/miR-181d-5p/miR-1270/miR-320b	ENSG00000072274,ENSG00000120802,ENSG00000121350,ENSG00000138018,ENSG00000153944,ENSG00000198838/ENSG00000120802,ENSG00000153944/ENSG00000172175,ENSG00000138018/ENSG00000107077/ENSG00000120802	1.827/3.35/2.726/3.244/1.838	0/0.002/0.007/0.036/0.14	0.00242324349062743/0.0109013117029807/0.0247105723654023/0.0996085776020604/0.308114573518513	0.442285	2.31481e-06	0.393291	3.31993e-05	0.230989	0.0177519	0.46385	0.44914	0.5063	0.83359	0.21247	0	0	0	0	0	hsa04662 (B cell receptor signaling pathway)	P04377 (Beta1 adrenergic receptor signaling pathway)	R-HSA-1483213 (Synthesis of PE)	WP2059 (Alzheimers Disease)	GO:0000041 (transition metal ion transport)
F:ME43	antiquewhite4	55	ENSG00000008394;ENSG00000019991;ENSG00000038945;ENSG00000044459;ENSG00000060749;ENSG00000067208;ENSG00000078124;ENSG00000082397;ENSG00000090382;ENSG00000100077;ENSG00000100596;ENSG00000102595;ENSG00000105967;ENSG00000107372;ENSG00000109436;ENSG00000112367;ENSG00000113494;ENSG00000114541;ENSG00000118855;ENSG00000121807;ENSG00000134243;ENSG00000134440;ENSG00000135218;ENSG00000135677;ENSG00000136783…	MGST1;HGF;MSR1;CNTLN;QSER1;EVI5;ACER3;EPB41L3;LYZ;GRK3;SPTLC2;UGGT2;TFEC;ZFAND5;TBC1D9;FIG4;PRLR;FRMD4B;MFSD1;CCR2;SORT1;NARS;CD36;GNS;NIPSNAP3A;IDH1;SCARB2;CTTNBP2NL;SETD7;MARCH1;FAM105A;LHFPL2;PLA2G7;RNF217;HNMT;FZD1;FAM198B;CYBB;ADAM9;AHCYL1;CLIC4;ZEB2;KCTD12;SLITRK4;FGD6;SLC36A4;C3orf58;AP1S2;DPYD;FUT4;TLR7;ITPRIPL2;S1PR3;SLC9A7P1;RP11-293M10.6	0.141554	1.60832	0.018625	0.0479953	0.392274	0.00958665	0.10969	miR-124-3p/miR-92a-3p	ENSG00000078124,ENSG00000090382,ENSG00000112367,ENSG00000135218,ENSG00000145569,ENSG00000146070,ENSG00000146373,ENSG00000168615/ENSG00000146373	1.285/0.43	0.001/0.462	0.0115036338940447/1	0.25577	0.00845233	0.224261	0.0214564	0.241762	0.012968	0.80617	0.34437	0.6466	0.029697	0.14482	0	0	0	0	0	hsa04142 (Lysosome)	P05911 (Angiotensin II-stimulated signaling through G proteins and beta-arrestin)	R-HSA-199992 (trans-Golgi Network Vesicle Budding)	WP408 (Oxidative Stress)	GO:0044872 (lipoprotein localization)
F:ME10	midnightblue	174	ENSG00000013288;ENSG00000023892;ENSG00000027847;ENSG00000032444;ENSG00000040487;ENSG00000063244;ENSG00000063322;ENSG00000064490;ENSG00000067606;ENSG00000068120;ENSG00000068308;ENSG00000070404;ENSG00000071655;ENSG00000072310;ENSG00000073050;ENSG00000073169;ENSG00000075399;ENSG00000076924;ENSG00000076944;ENSG00000076984;ENSG00000077463;ENSG00000078061;ENSG00000079337;ENSG00000087088;ENSG00000090581…	MAN2B2;DEF6;B4GALT7;PNPLA6;PQLC2;U2AF2;MED29;RFXANK;PRKCZ;COASY;OTUD5;FSTL3;MBD3;SREBF1;XRCC1;SELO;VPS9D1;XAB2;STXBP2;MAP2K7;SIRT6;ARAF;RAPGEF3;BAX;GNPTG;OCEL1;MADCAM1;DGCR14;HIRA;ARSA;CBX7;ASCC2;RANGAP1;EMC9;ARFGAP1;WDR13;TRADD;KAT8;GSDMD;TSTA3;CCDC61;USF2;SMG9;ADAP1;BRAT1;ABHD11;USP42;LZTS2;FBXL15;FOXRED1;SPSB2;SLC39A7;CCND3;CYB561D2;WRAP73;MIIP;ZBTB17;IPO13;PEX16;TMEM39B;PDE1B;LRRC29;NCLN;LRRC…	0.139582	-2.05777	0.000875657	0.00469352	-0.334311	0.0012987	0.087013	miR-4286/miR-320b/miR-532-3p/miR-92a-3p/miR-124-3p	ENSG00000100307/ENSG00000141569,ENSG00000161904/ENSG00000166619/ENSG00000138964,ENSG00000182872/ENSG00000100307,ENSG00000141569,ENSG00000166619,ENSG00000172819	1.081/0.55/0.475/-0.029/-0.56	0.274/0.295/0.445/0.578/0.899	1/1/1/1/1	-0.194294	0.0470268	-0.180109	0.0659819	-0.131446	0.181352	0.090589	0.46185	0.491	0.7466	0.28996	0	1	0	2	0	hsa04071 (Sphingolipid signaling pathway)	P00021 (FGF signaling pathway)	R-HSA-6804758 (Regulation of TP53 Activity through Acetylation)	WP231 (TNF alpha Signaling Pathway)	GO:0035966 (response to topologically incorrect protein)
F:ME127	blue	388	ENSG00000000938;ENSG00000004660;ENSG00000005007;ENSG00000006327;ENSG00000007516;ENSG00000008516;ENSG00000012171;ENSG00000012822;ENSG00000013364;ENSG00000013810;ENSG00000015285;ENSG00000018280;ENSG00000023839;ENSG00000026297;ENSG00000026950;ENSG00000035664;ENSG00000039523;ENSG00000051009;ENSG00000051128;ENSG00000060971;ENSG00000061273;ENSG00000063169;ENSG00000064547;ENSG00000065665;ENSG00000068400…	FGR;CAMKK1;UPF1;TNFRSF12A;BAIAP3;MMP25;SEMA3B;CALCOCO1;MVP;TACC3;WAS;SLC11A1;ABCC2;RNASET2;BTN3A1;DAPK2;FAM65A;FAM160A2;HOMER3;ACAA1;HDAC7;GLTSCR1;LPAR2;SEC61A2;GRIPAP1;PYGM;ZXDC;WIPI1;GBA2;CHFR;PANX2;SRCAP;DLGAP4;MAPRE3;SH3BP2;NSFL1C;SLC8B1;YPEL3;MAEA;STRN4;RPGRIP1;UNC13D;VNN3;SH2D3C;UPB1;GGT1;RAB36;CERK;C14orf93;MTG2;DNTTIP1;RENBP;KCND1;SLC35A2;DHRS12;GDPD3;NECAB2;TSC2;CLASRP;FCGRT;STX10;PRKD2;…	0.138568	-2.39953	0.00298507	0.0111111	-0.271822	1	1	miR-124-3p/miR-4516/miR-23a-5p/miR-532-3p/miR-4286/miR-181d-5p/miR-92a-3p/miR-550a-3p/miR-320b	ENSG00000006327,ENSG00000026297,ENSG00000090238,ENSG00000100422,ENSG00000102100,ENSG00000111652,ENSG00000114626,ENSG00000125637,ENSG00000126561,ENSG00000134222,ENSG00000141551,ENSG00000143412,ENSG00000143878,ENSG00000158480,ENSG00000169087,ENSG00000173825,ENSG00000177169,ENSG00000187837,ENSG00000203879,ENSG00000237441/ENSG00000157881/ENSG00000143878/ENSG00000088833,ENSG00000100422/ENSG00000181220…	0.248/2.071/1.195/0.366/0.279/-0.057/-0.137/-0.126/-0.252	0.089/0.111/0.247/0.369/0.508/0.587/0.617/0.655/0.692	0.61243842503068/0.61243842503068/0.845372573065814/0.845372573065814/0.845372573065814/0.845372573065814/0.845372573065814/0.845372573065814/0.845372573065814	-0.250253	0.0100314	-0.238281	0.0143736	-0.203066	0.0377468	0.26903	0.51335	0.41425	0.37584	0.14682	0	0	1	0	2	hsa00770 (Pantothenate and CoA biosynthesis)	P00026 (Heterotrimeric G-protein signaling pathway-Gi alpha and Gs alpha mediated pathway)	R-HSA-6798695 (Neutrophil degranulation)	WP4577 (Neurodegeneration with brain iron accumulation (NBIA) subtypes pathway)	GO:0002446 (neutrophil mediated immunity)
F:ME18	steelblue	96	ENSG00000004534;ENSG00000007392;ENSG00000042286;ENSG00000050426;ENSG00000063127;ENSG00000064995;ENSG00000078401;ENSG00000079974;ENSG00000088543;ENSG00000100058;ENSG00000101391;ENSG00000102901;ENSG00000103091;ENSG00000104731;ENSG00000105519;ENSG00000105717;ENSG00000106992;ENSG00000109063;ENSG00000112941;ENSG00000115211;ENSG00000124602;ENSG00000125846;ENSG00000130584;ENSG00000130714;ENSG00000132323…	RBM6;LUC7L;AIFM2;LETMD1;SLC6A16;TAF11;EDN1;RABL2B;C3orf18;CRYBB2P1;CDK5RAP1;CENPT;WDR59;KLHDC4;CAPS;PBX4;AK1;MYH3;PAPD7;EIF2B4;UNC5CL;ZNF133;ZBTB46;POMT1;ILKAP;DCAF8;C1QTNF6;AP4B1;DDX56;RSAD1;PARP6;RDH16;TMC6;PPOX;EIF2B5;PCYOX1L;TMEM138;ROBO3;SFXN2;ANKRD23;ERCC3;POLR2H;MCM7;CATSPER2;MRPL16;CNPY4;MEI1;ANKS3;WNT10B;KCNAB3;TPT1-AS1;METAP1D;FGFBP3;CLK2;DTX3;D2HGDH;ACBD4;HKR1;FAM159A;VPS33B;CCDC84;TRP…	0.134143	-1.89226	0.000511247	0.0034865	-0.30811	0.223261	0.490443	miR-124-3p	ENSG00000078401,ENSG00000176444	-0.658	0.885	1	-0.142789	0.146198	-0.142795	0.14618	-0.108519	0.27049	0.27966	0.47972	0.15932	0.51667	0.53627	0	0	0	0	0	hsa03022 (Basal transcription factors)	P00001 (Adrenaline and noradrenaline biosynthesis)	R-HSA-167161 (HIV Transcription Initiation)	WP405 (Eukaryotic Transcription Initiation)	GO:0046717 (acid secretion)
F:ME116	red	272	ENSG00000005238;ENSG00000006652;ENSG00000008083;ENSG00000008130;ENSG00000012779;ENSG00000022567;ENSG00000023330;ENSG00000033627;ENSG00000047578;ENSG00000047644;ENSG00000049249;ENSG00000064932;ENSG00000066136;ENSG00000068323;ENSG00000068383;ENSG00000069943;ENSG00000070371;ENSG00000070759;ENSG00000072694;ENSG00000074660;ENSG00000076864;ENSG00000077150;ENSG00000077157;ENSG00000078618;ENSG00000084070…	FAM214B;IFRD1;JARID2;NADK;ALOX5;SLC45A4;ALAS1;ATP6V0A1;KIAA0556;WWC3;TNFRSF9;SBNO2;NFYC;TFE3;INPP5A;PIGB;CLTCL1;TESK2;FCGR2B;SCARF1;RAP1GAP;NFKB2;PPP1R12B;NRDC;SMAP2;HAL;BCORL1;LAT2;UIMC1;GRAMD1A;ABCC6;CYTH4;MTMR3;NCF4;RBM23;NFKBIA;TPD52L2;HCK;PIM2;RUBCNL;MGRN1;USP10;CRISPLD2;RELB;DENND3;JAK3;ELL;IMPDH1;CNTNAP3;PPIF;FBXL20;UNC119;BIN2;ACSS3;GLI1;LTBR;SLC26A8;VNN2;BTNL8;HRH2;BCL6;PFKFB4;KIAA1257;I…	0.125011	-2.00724	0.0015949	0.00740495	0.276356	1	1	miR-92a-3p/miR-23a-5p/miR-532-3p/miR-181d-5p/miR-320b/miR-124-3p	ENSG00000130703,ENSG00000084070,ENSG00000114268,ENSG00000125834,ENSG00000198742/ENSG00000185650/ENSG00000084070,ENSG00000125834/ENSG00000185650/ENSG00000185650/ENSG00000084070,ENSG00000125834,ENSG00000130703,ENSG00000130939,ENSG00000142599,ENSG00000185650,ENSG00000221869	0.441/1.551/0.721/-0.395/-0.589/-0.447	0.172/0.178/0.223/0.746/0.811/0.876	0.81676655654447/0.81676655654447/0.81676655654447/1/1/1	-0.194558	0.0467225	-0.180811	0.0649174	-0.155044	0.114272	0.9923	0.30077	0.33678	0.90543	0.90923	2	0	1	2	32	hsa04380 (Osteoclast differentiation)	P00054 (Toll receptor signaling pathway)	R-HSA-6798695 (Neutrophil degranulation)	WP2324 (AGE/RAGE pathway)	GO:0036230 (granulocyte activation)
F:ME17	mediumpurple	22	ENSG00000117360;ENSG00000124222;ENSG00000139631;ENSG00000169964;ENSG00000179912;ENSG00000185917;ENSG00000187742;ENSG00000189007;ENSG00000198105;ENSG00000198556;ENSG00000228486;ENSG00000235194;ENSG00000239569;ENSG00000241170;ENSG00000245164;ENSG00000248019;ENSG00000257621;ENSG00000261490;ENSG00000267002;ENSG00000269609;ENSG00000271870;ENSG00000274020	PRPF3;STX16;CSAD;TMEM42;R3HDM2;SETD4;SECISBP2;ADAT2;ZNF248;ZNF789;LINC01125;PPP1R3E;KMT2E-AS1;RP11-147I3.1;LINC00861;FAM13A-AS1;PSMA3-AS1;RP11-448G15.3;RP11-242D8.1;RPARP-AS1;RP11-97C16.1;LINC01138	0.121131	-1.6989	0.00137855	0.00684169	-0.380655	0.116983	0.314321	NA	NA	NA	NA	NA	-0.245422	0.0116211	-0.240495	0.0134652	-0.191489	0.0503661	0.25613	0.16764	0.78532	0.10433	0.4777	0	0	0	0	0	hsa04130 (SNARE interactions in vesicular transport)	P02739 (De novo pyrimidine deoxyribonucleotide biosynthesis)	R-HSA-1614558 (Degradation of cysteine and homocysteine)	WP4504 (Cysteine and methionine catabolism)	GO:0005976 (polysaccharide metabolic process)
F:ME109	yellow	284	ENSG00000005486;ENSG00000010404;ENSG00000012211;ENSG00000015475;ENSG00000022277;ENSG00000031823;ENSG00000034152;ENSG00000052749;ENSG00000054179;ENSG00000054611;ENSG00000059377;ENSG00000060069;ENSG00000063245;ENSG00000063978;ENSG00000066322;ENSG00000066336;ENSG00000067182;ENSG00000068001;ENSG00000069399;ENSG00000070413;ENSG00000071553;ENSG00000072786;ENSG00000075624;ENSG00000081913;ENSG00000083444…	RHBDD2;IDS;PRICKLE3;BID;RTFDC1;RANBP3;MAP2K3;RRP12;ENTPD2;TBC1D22A;TBXAS1;CTDP1;EPN1;RNF4;ELOVL1;SPI1;TNFRSF1A;HYAL2;BCL3;DGCR2;ATP6AP1;STK10;ACTB;PHLPP1;PLOD1;CD82;PILRA;ITPKC;SF3B2;RFX2;EDEM2;MLF2;DTX2;ALKBH5;TINF2;CRAT;TBC1D2;KLHL22;CABIN1;TRIOBP;RSPH14;TOM1;ABHD4;RIN3;ITPK1;DNAJC5;CTSZ;HM13;MAP1LC3A;PLP2;CORO1A;PARD6A;BCKDK;CSK;VPS18;NFKBIB;CD37;MED25;LILRA1;ASF1B;VRK3;CCDC9;TGFB1;PLPPR2;FKBP…	0.119566	-2.02578	0.00181818	0.00800478	-0.28573	0.571429	0.817735	miR-1270/miR-532-3p/miR-124-3p	ENSG00000111540/ENSG00000157837/ENSG00000100439	0.773/-0.015/-2.436	0.355/0.619/1	1/1/1	-0.168439	0.0858659	-0.140101	0.154023	-0.0933781	0.343405	0.16612	0.24861	0.49424	0.97912	0.677	8	0	1	0	0	hsa04145 (Phagosome)	P00016 (Cytoskeletal regulation by Rho GTPase)	R-HSA-1236977 (Endosomal/Vacuolar pathway)	WP384 (Apoptosis Modulation by HSP70)	GO:0052192 (movement in environment of other organism involved in symbiotic interaction)
F:ME27	pink	260	ENSG00000007341;ENSG00000009790;ENSG00000010244;ENSG00000020922;ENSG00000033122;ENSG00000042980;ENSG00000052841;ENSG00000064933;ENSG00000066651;ENSG00000070718;ENSG00000074935;ENSG00000077458;ENSG00000078070;ENSG00000080822;ENSG00000082512;ENSG00000083750;ENSG00000088970;ENSG00000089022;ENSG00000089053;ENSG00000089818;ENSG00000092094;ENSG00000096093;ENSG00000100650;ENSG00000100941;ENSG00000101442…	ST7L;TRAF3IP3;ZNF207;MRE11A;LRRC7;ADAM28;TTC17;PMS1;TRMT11;AP3M2;TUBE1;FAM76B;MCCC1;CLDND1;TRAF5;RRAGB;KIZ;MAPKAPK5;ANAPC5;NECAP1;OSGEP;EFHC1;SRSF5;PNN;ACTR5;POLI;KLF8;SETD6;DTWD1;MYEF2;MRPL32;STAG3L4;EDRF1;PIGL;DDX5;LUC7L3;WSB1;FNBP4;RSRC2;DDX55;CPSF6;FBXO9;NIT2;UNC50;SF3B1;SRSF7;TIA1;SFPQ;TTF2;LGALS8;SLC35A3;RBM25;COQ6;SUPT7L;NR2C1;AKAP1;PSPC1;TTC21B;EXOSC9;SRSF6;FASTKD3;L3HYPDH;OMG;HP1BP3;PMS2…	0.118048	1.63238	0.0162411	0.0432757	0.321153	0.270703	0.541407	miR-124-3p/miR-550a-3p/miR-181d-5p/miR-532-3p/miR-1270/miR-4286/miR-320b/miR-92a-3p	ENSG00000089053,ENSG00000100650,ENSG00000108654,ENSG00000112146,ENSG00000116977,ENSG00000124193,ENSG00000127980,ENSG00000132424,ENSG00000135945,ENSG00000136527,ENSG00000137955,ENSG00000151849,ENSG00000152795,ENSG00000162613,ENSG00000163660,ENSG00000177479,ENSG00000188529,ENSG00000204271,ENSG00000205758,ENSG00000213551,ENSG00000241343/ENSG00000108654,ENSG00000132424,ENSG00000151849,ENSG00000163660…	0.697/1.66/1.036/1.172/0.862/0.679/0.149/-0.025	0.001/0.005/0.044/0.056/0.328/0.38/0.48/0.55	0.00926569208399352/0.0298793472923183/0.153827774157117/0.153827774157117/0.696156451602905/0.696156451602905/0.754756547603047/0.756592321548525	0.25647	0.0082685	0.208565	0.032752	0.0990766	0.314629	0.54694	0.48847	0.74259	0.095761	0.27163	1	0	0	1	4	hsa03040 (Spliceosome)	P00055 (Transcription regulation by bZIP transcription factor)	R-HSA-72203 (Processing of Capped Intron-Containing Pre-mRNA)	WP411 (mRNA Processing)	GO:0006397 (mRNA processing)
F:ME55	orangered3	50	ENSG00000035499;ENSG00000051341;ENSG00000065328;ENSG00000066279;ENSG00000072571;ENSG00000087586;ENSG00000088325;ENSG00000089685;ENSG00000090889;ENSG00000094804;ENSG00000101057;ENSG00000104738;ENSG00000109805;ENSG00000112742;ENSG00000112984;ENSG00000117650;ENSG00000117724;ENSG00000118193;ENSG00000121152;ENSG00000123485;ENSG00000126787;ENSG00000129173;ENSG00000131153;ENSG00000131747;ENSG00000136492…	DEPDC1B;POLQ;MCM10;ASPM;HMMR;AURKA;TPX2;BIRC5;KIF4A;CDC6;MYBL2;MCM4;NCAPG;TTK;KIF20A;NEK2;CENPF;KIF14;NCAPH;HJURP;DLGAP5;E2F8;GINS2;TOP2A;BRIP1;NUSAP1;KNL1;KIF11;CEP55;CENPE;FANCI;KIF2C;NUF2;DTL;CCNA2;MKI67;SKA1;BUB1B;CCNB2;KIF15;MELK;TK1;BUB1;CDK1;SHCBP1;RRM2;FAM46C;CDCA2;KIF18B;KIFC1	0.114089	-1.71346	0.000355366	0.0034865	-0.318289	0.236068	0.494268	NA	NA	NA	NA	NA	-0.0658526	0.504494	-0.0689262	0.484764	-0.23956	0.0138424	0.43319	0.20407	0.94474	0.58327	0.64703	5	0	53	5	33	hsa04110 (Cell cycle)	P00059 (p53 pathway)	R-HSA-69278 (Cell Cycle, Mitotic)	WP2361 (Gastric Cancer Network 1)	GO:0048285 (organelle fission)
F:ME71	orangered	22	ENSG00000001630;ENSG00000031003;ENSG00000053254;ENSG00000072803;ENSG00000081320;ENSG00000085719;ENSG00000109171;ENSG00000113712;ENSG00000114439;ENSG00000118007;ENSG00000120690;ENSG00000121274;ENSG00000122042;ENSG00000135999;ENSG00000139826;ENSG00000143324;ENSG00000163659;ENSG00000165997;ENSG00000170881;ENSG00000173744;ENSG00000180776;ENSG00000196110	CYP51A1;FAM13B;FOXN3;FBXW11;STK17B;CPNE3;SLAIN2;CSNK1A1;BBX;STAG1;ELF1;PAPD5;UBL3;EPC2;ABHD13;XPR1;TIPARP;ARL5B;RNF139;AGFG1;ZDHHC20;ZNF699	0.11315	1.41815	0.0625882	0.118124	-0.34805	0.0741027	0.254609	miR-181d-5p/miR-320b/miR-124-3p/miR-92a-3p	ENSG00000135999,ENSG00000139826,ENSG00000165997/ENSG00000165997,ENSG00000170881,ENSG00000173744/ENSG00000122042,ENSG00000139826,ENSG00000170881,ENSG00000173744,ENSG00000180776/ENSG00000053254,ENSG00000165997,ENSG00000170881	3.218/3.024/1.732/2.445	0/0/0.001/0.002	0.00185241731282929/0.00185241731282929/0.00439814221302741/0.00497093389315084	0.33226	0.000534543	0.290491	0.00264608	0.141915	0.148709	0.29615	0.15284	0.85043	0.38875	0.51056	0	1	0	0	0	hsa04340 (Hedgehog signaling pathway)	P00025 (Hedgehog signaling pathway)	R-HSA-2470946 (Cohesin Loading onto Chromatin)	WP1982 (Sterol Regulatory Element-Binding Proteins (SREBP) signalling)	GO:0045103 (intermediate filament-based process)
F:ME9	brown	311	ENSG00000004777;ENSG00000006015;ENSG00000007541;ENSG00000010295;ENSG00000011143;ENSG00000015532;ENSG00000055955;ENSG00000059122;ENSG00000061936;ENSG00000061938;ENSG00000064687;ENSG00000068831;ENSG00000069424;ENSG00000070423;ENSG00000071889;ENSG00000072778;ENSG00000072818;ENSG00000076201;ENSG00000076928;ENSG00000080189;ENSG00000086288;ENSG00000087077;ENSG00000089280;ENSG00000089820;ENSG00000090447…	ARHGAP33;C19orf60;PIGQ;IFFO1;MKS1;XYLT2;ITIH4;FLYWCH1;SFSWAP;TNK2;ABCA7;RASGRP2;KCNAB2;RNF126;FAM3A;ACADVL;ACAP1;PTPN23;ARHGEF1;SLC35C2;NME8;TRIP6;FUS;ARHGAP4;TFAP4;GOLGA3;NLRP1;AAAS;HOOK2;WHRN;MZF1;CIRBP;IZUMO4;RASSF7;MED15;TBC1D10A;GGA1;DEPDC5;PICK1;PPP6R2;LMF2;RHBDD3;TRMU;BRD1;ACIN1;PABPN1;REC8;PABPC1L;TAZ;CDK16;HSF4;ELMO3;ACD;NME3;COG4;MTHFSD;RHBDL1;KCNN4;SNRNP70;SF3A2;TBC1D17;CCDC130;PTOV1;N…	0.107686	-1.85366	0.00200803	0.00815383	-0.334099	0.0042735	0.0954416	miR-4286	ENSG00000177051	0.5	0.437	1	-0.113959	0.247058	-0.124424	0.206004	-0.108353	0.271229	0.34428	0.98259	0.94868	0.77885	0.51169	0	0	0	0	0	hsa03015 (mRNA surveillance pathway)	P04394 (Thyrotropin-releasing hormone receptor signaling pathway)	R-HSA-8854214 (TBC/RABGAPs)	WP3645 (NAD+ biosynthetic pathways)	GO:0007205 (protein kinase C-activating G protein-coupled receptor signaling pathway)
F:ME115	coral1	56	ENSG00000003402;ENSG00000028528;ENSG00000068024;ENSG00000073331;ENSG00000079277;ENSG00000101236;ENSG00000101493;ENSG00000105352;ENSG00000108349;ENSG00000108950;ENSG00000109466;ENSG00000111052;ENSG00000112062;ENSG00000116793;ENSG00000119121;ENSG00000120733;ENSG00000123643;ENSG00000124224;ENSG00000127954;ENSG00000131389;ENSG00000132334;ENSG00000134698;ENSG00000136161;ENSG00000138185;ENSG00000140443…	CFLAR;SNX1;HDAC4;ALPK1;MKNK1;RNF24;ZNF516;CEACAM4;CASC3;FAM20A;KLHL2;LIN7A;MAPK14;PHTF1;TRPM6;KDM3B;SLC36A1;PPP4R1L;STEAP4;SLC6A6;PTPRE;AGO4;RCBTB2;ENTPD1;IGF1R;MCTP2;NPEPPS;ARSG;SNX27;MBOAT2;ARHGAP26;FBXO38;CREB5;DOCK5;ZNF333;SLC22A15;RBM47;STX3;KDM2A;PPP1R3B;TLR6;MSL1;SVIL;CDC42SE1;PLCG2;C1orf132;RP11-563J2.3;UBXN2B;AC116366.5;LUCAT1;RP11-321E2.3;RP11-321E2.4;AP000640.10;MMP25-AS1;ST3GAL4-AS1;E…	0.0995619	-1.69177	0.00185185	0.00800478	0.348651	0.0470429	0.202989	miR-532-3p	ENSG00000143376	1.609	0.167	1	-0.164211	0.0941497	-0.168373	0.0859903	-0.155784	0.112534	0.86203	0.18266	0.71151	0.99033	0.13121	0	0	0	1	0	hsa04066 (HIF-1 signaling pathway)	P05918 (p38 MAPK pathway)	R-HSA-352230 (Amino acid transport across the plasma membrane)	WP4321 (Thermogenesis)	GO:0006836 (neurotransmitter transport)
F:ME22	lightpink3	41	ENSG00000006625;ENSG00000081721;ENSG00000089006;ENSG00000100442;ENSG00000105185;ENSG00000108423;ENSG00000108666;ENSG00000109180;ENSG00000111237;ENSG00000113845;ENSG00000114503;ENSG00000114956;ENSG00000115368;ENSG00000118418;ENSG00000120860;ENSG00000123562;ENSG00000128654;ENSG00000129084;ENSG00000129460;ENSG00000130935;ENSG00000132664;ENSG00000134375;ENSG00000135521;ENSG00000138050;ENSG00000148444…	GGCT;DUSP12;SNX5;FKBP3;PDCD5;TUBD1;C17orf75;OCIAD1;VPS29;TIMMDC1;NCBP2;DGUOK;WDR75;HMGN3;CCDC53;MORF4L2;MTX2;PSMA1;NGDN;NOL11;POLR3F;TIMM17A;LTV1;THUMPD2;COMMD3;MTERF3;SLC35A1;TMEM126A;ARV1;SMIM19;COA4;RPS27L;HSPA14;ZNF559;NIF3L1;AMZ2;HIBCH;DNAJC19;MCTS1;MAPKAPK5-AS1;SNHG6	0.0987147	-1.66478	0.0022981	0.0090572	0.33816	0.385452	0.670787	miR-124-3p	ENSG00000132664,ENSG00000234608	0.193	0.465	1	-0.195002	0.0462132	-0.170432	0.0821679	-0.149321	0.128434	0.648	0.58787	0.94567	0.23204	0.74291	0	0	1	0	1	hsa04144 (Endocytosis)	P00046 (Oxidative stress response)	R-HSA-1268020 (Mitochondrial protein import)	WP4792 (Purine metabolism)	GO:0022613 (ribonucleoprotein complex biogenesis)
F:ME101	thistle2	61	ENSG00000002330;ENSG00000013275;ENSG00000053372;ENSG00000057757;ENSG00000074071;ENSG00000099624;ENSG00000099795;ENSG00000100348;ENSG00000103145;ENSG00000103415;ENSG00000104823;ENSG00000105197;ENSG00000105677;ENSG00000110711;ENSG00000112667;ENSG00000117691;ENSG00000119632;ENSG00000125611;ENSG00000125835;ENSG00000125901;ENSG00000127191;ENSG00000127554;ENSG00000128524;ENSG00000128626;ENSG00000130165…	BAD;PSMC4;MRTO4;PITHD1;MRPS34;ATP5D;NDUFB7;TXN2;HCFC1R1;HMOX2;ECH1;TIMM50;TMEM147;AIP;DNPH1;NENF;IFI27L2;CHCHD5;SNRPB;MRPS26;TRAF2;GFER;ATP6V1F;MRPS12;ELOF1;MRPL34;LSM4;UCK1;EIF5A;TXNL4A;HAX1;TMEM219;BATF;RPUSD3;JOSD2;FAAP20;MRPL55;NAXE;ELP6;URM1;GPX4;TRAPPC2L;COPS6;TMEM208;STRA13;JAGN1;SCAND1;MRPL57;PPP1R14B;LINC00116;NDUFAF3;EXOSC4;SEPW1;GADD45GIP1;MRPL54;LAGE3;RNF5;C4orf48;RCC1L;CISD3;RP11-51F…	0.0978493	-1.67229	0.00192012	0.00804051	-0.287637	0.874025	0.967928	NA	NA	NA	NA	NA	-0.163321	0.0959722	-0.115293	0.24153	-0.0557676	0.572042	0.70737	0.59081	0.68372	0.43928	0.42191	0	0	5	0	3	hsa00190 (Oxidative phosphorylation)	P00030 (Hypoxia response via HIF activation)	R-HSA-5389840 (Mitochondrial translation elongation)	WP4352 (Ciliary landscape)	GO:0140053 (mitochondrial gene expression)
F:ME92	coral3	37	ENSG00000049239;ENSG00000070366;ENSG00000088888;ENSG00000100441;ENSG00000107185;ENSG00000107263;ENSG00000112640;ENSG00000116128;ENSG00000121281;ENSG00000130723;ENSG00000135392;ENSG00000139613;ENSG00000139725;ENSG00000140829;ENSG00000143641;ENSG00000143786;ENSG00000149503;ENSG00000150457;ENSG00000160294;ENSG00000165424;ENSG00000168763;ENSG00000169926;ENSG00000170734;ENSG00000176986;ENSG00000180233…	H6PD;SMG6;MAVS;KHNYN;RGP1;RAPGEF1;PPP2R5D;BCL9;ADCY7;PRRC2B;DNAJC14;SMARCC2;RHOF;DHX38;GALNT2;CNIH3;INCENP;LATS2;MCM3AP;ZCCHC24;CNNM3;KLF13;POLH;SEC24C;ZNRF2;BCOR;BTBD9;FAM83G;SLX4;POM121;ZSCAN25;AC079807.2;AC073046.25;RP11-274B21.14;CTB-133G6.1;SOCS7;RP11-429P3.8	0.0946985	1.41634	0.0583382	0.111676	-0.325998	0.11138	0.310936	miR-124-3p/miR-1270/miR-532-3p/miR-92a-3p	ENSG00000100441,ENSG00000121281,ENSG00000139613,ENSG00000139725/ENSG00000100441/ENSG00000100441/ENSG00000100441	0.989/2.811/2.023/0.826	0.047/0.054/0.115/0.333	0.296209558759958/0.296209558759958/0.420818642496471/0.915788748784346	0.297622	0.00204651	0.250821	0.00985763	0.204264	0.0366071	0.49424	0.34567	0.04267	0.036518	0.2122	0	0	0	0	0	hsa03460 (Fanconi anemia pathway)	P00057 (Wnt signaling pathway)	R-HSA-5694530 (Cargo concentration in the ER)	WP4321 (Thermogenesis)	GO:0015931 (nucleobase-containing compound transport)
F:ME79	plum1	79	ENSG00000012983;ENSG00000013375;ENSG00000018189;ENSG00000029363;ENSG00000075407;ENSG00000087470;ENSG00000101574;ENSG00000103035;ENSG00000104613;ENSG00000104756;ENSG00000106692;ENSG00000109606;ENSG00000109618;ENSG00000111554;ENSG00000111879;ENSG00000112200;ENSG00000112739;ENSG00000113597;ENSG00000113838;ENSG00000114120;ENSG00000114999;ENSG00000117533;ENSG00000118762;ENSG00000120686;ENSG00000120925…	MAP4K5;PGM3;RUFY3;BCLAF1;ZNF37A;DNM1L;METTL4;PSMD7;INTS10;KCTD9;FKTN;DHX15;SEPSECS;MDM1;FAM184A;ZNF451;PRPF4B;TRAPPC13;TBCCD1;SLC25A36;TTL;VAMP4;PKD2;UFM1;RNF170;ZC3H7A;CCDC18;MRS2;THOC2;ARMCX5;ZNF141;CAPN7;GPALPP1;NAPG;TPP2;ACTL6A;CBWD2;KIAA0368;FAM149B1;PHOSPHO2;TBCK;DDX46;RBAK;ZNF711;WDR17;GUF1;ZUFSP;AK9;USP16;AASDH;PAXBP1;ZNF382;SMC6;GNPDA2;U2SURP;TOPBP1;STARD4;PGGT1B;CCDC112;PRIMPOL;ARHGAP12…	0.0854066	1.50434	0.0308746	0.0656697	0.30476	0.715341	0.872757	miR-181d-5p/miR-92a-3p/miR-124-3p/miR-550a-3p/miR-320b/miR-532-3p	ENSG00000109606,ENSG00000114120,ENSG00000125676,ENSG00000188811/ENSG00000109606,ENSG00000114120,ENSG00000136813,ENSG00000161298,ENSG00000174799/ENSG00000018189,ENSG00000109606,ENSG00000114120,ENSG00000125676,ENSG00000134900,ENSG00000136813,ENSG00000145348,ENSG00000188811/ENSG00000125676,ENSG00000165525/ENSG00000136813,ENSG00000188811/ENSG00000125676	2.227/1.677/0.923/2.158/1.34/1.264	0.001/0.002/0.01/0.02/0.088/0.235	0.00810853938492682/0.0104843465560162/0.0372082515811601/0.0552730992196625/0.193069303550851/0.43082245693542	0.306611	0.00146664	0.258683	0.00771044	0.159268	0.104622	0.98757	0.17436	0.54237	0.50092	0.26305	0	0	0	0	0	hsa03040 (Spliceosome)	P00013 (Cell cycle)	R-HSA-6811440 (Retrograde transport at the Trans-Golgi-Network)	WP4016 (DNA IR-damage and cellular response via ATR)	GO:0006414 (translational elongation)
F:ME130	lavenderblush1	27	ENSG00000062716;ENSG00000074319;ENSG00000086589;ENSG00000091106;ENSG00000113269;ENSG00000116701;ENSG00000119729;ENSG00000119979;ENSG00000132823;ENSG00000138433;ENSG00000140350;ENSG00000140749;ENSG00000143207;ENSG00000147416;ENSG00000149269;ENSG00000151466;ENSG00000158769;ENSG00000162444;ENSG00000162704;ENSG00000163950;ENSG00000166130;ENSG00000178913;ENSG00000178935;ENSG00000183255;ENSG00000189159…	VMP1;TSG101;RBM22;NLRC4;RNF130;NCF2;RHOQ;FAM45A;OSER1;CIR1;ANP32A;IGSF6;RFWD2;ATP6V1B2;PAK1;SCLT1;F11R;RBP7;ARPC5;SLBP;IKBIP;TAF7;ZNF552;PTTG1IP;HN1;TATDN3;CCPG1	0.0847731	-1.58636	0.0111652	0.0325247	-0.318339	0.408351	0.683593	miR-1270/miR-181d-5p/miR-124-3p	ENSG00000074319/ENSG00000074319/ENSG00000074319,ENSG00000183255	3.127/1.915/0.61	0.041/0.13/0.274	0.447253379414995/0.717211492050789/1	-0.276497	0.00430072	-0.227632	0.0195246	-0.177707	0.0697363	0.098456	0.28732	0.24617	0.21835	0.46429	0	0	0	0	0	hsa05120 (Epithelial cell signaling in Helicobacter pylori infection)	P00016 (Cytoskeletal regulation by Rho GTPase)	R-HSA-1222556 (ROS, RNS production in phagocytes)	WP3945 (TYROBP Causal Network)	GO:0032970 (regulation of actin filament-based process)
F:ME126	darkseagreen2	27	ENSG00000005302;ENSG00000064225;ENSG00000103707;ENSG00000105483;ENSG00000117616;ENSG00000120051;ENSG00000134152;ENSG00000134851;ENSG00000135655;ENSG00000151743;ENSG00000151883;ENSG00000158201;ENSG00000158411;ENSG00000162869;ENSG00000163328;ENSG00000166912;ENSG00000173559;ENSG00000188021;ENSG00000198001;ENSG00000198216;ENSG00000198408;ENSG00000198673;ENSG00000236345;ENSG00000246263;ENSG00000250616…	MSL3;ST3GAL6;MTFMT;CARD8;RSRP1;CFAP58;KATNBL1;TMEM165;USP15;AMN1;PARP8;ABHD3;MITD1;PPP1R21;GPR155;MTMR10;NABP1;UBQLN2;IRAK4;CACNA1E;MGEA5;FAM19A2;RP11-59D5__B.2;UBR5-AS1;RP11-455F5.3;ZNF674;RP11-196G18.22	0.083416	-1.5897	0.0108789	0.0323949	-0.329504	0.373483	0.667788	miR-181d-5p/miR-92a-3p/miR-124-3p	ENSG00000188021/ENSG00000198408/ENSG00000158201	1.915/1.141/-0.083	0.13/0.262/0.649	1/1/1	-0.244646	0.011896	-0.238399	0.0143237	-0.170096	0.0827815	0.22559	0.076772	0.61948	0.83176	0.38081	0	0	0	0	0	hsa04621 (NOD-like receptor signaling pathway)	P00037 (Ionotropic glutamate receptor pathway)	R-HSA-5603041 (IRAK4 deficiency (TLR2/4))	WP4478 (LTF danger signal response pathway)	GO:0070085 (glycosylation)
F:ME75	plum4	29	ENSG00000086200;ENSG00000092140;ENSG00000095261;ENSG00000112144;ENSG00000115966;ENSG00000122482;ENSG00000131725;ENSG00000133561;ENSG00000134987;ENSG00000139793;ENSG00000145331;ENSG00000147124;ENSG00000155545;ENSG00000166266;ENSG00000168116;ENSG00000169018;ENSG00000169379;ENSG00000174032;ENSG00000177485;ENSG00000177888;ENSG00000178177;ENSG00000184743;ENSG00000186106;ENSG00000188419;ENSG00000196418…	IPO11;G2E3;PSMD5;ICK;ATF2;ZNF644;WDR44;GIMAP6;WDR36;MBNL2;TRMT10A;ZNF41;MIER3;CUL5;KIAA1586;FEM1B;ARL13B;SLC25A30;ZBTB33;ZBTB41;LCORL;ATL3;ANKRD46;CHM;ZNF124;SLC39A10;MAK16;ZNF627;ZNF260	0.0827661	-1.66362	0.00489914	0.0172759	-0.34462	0.15758	0.406072	miR-124-3p/miR-181d-5p	ENSG00000086200,ENSG00000186106,ENSG00000198551/ENSG00000198551	0.944/1.843	0.096/0.139	0.766501625396739/0.766501625396739	-0.0710325	0.471485	-0.110957	0.259807	-0.0381239	0.699409	0.54171	0.43429	0.14507	0.090299	0.078259	0	0	0	0	0	hsa05030 (Cocaine addiction)	P00046 (Oxidative stress response)	R-HSA-180585 (Vif-mediated degradation of APOBEC3G)	WP4536 (Genes related to primary cilium development (based on CRISPR))	GO:0043687 (post-translational protein modification)
F:ME47	lightgreen	157	ENSG00000006756;ENSG00000008441;ENSG00000010610;ENSG00000013583;ENSG00000019169;ENSG00000019582;ENSG00000030582;ENSG00000031081;ENSG00000038382;ENSG00000038427;ENSG00000055957;ENSG00000060138;ENSG00000068697;ENSG00000073060;ENSG00000076067;ENSG00000088256;ENSG00000088812;ENSG00000090659;ENSG00000092964;ENSG00000093072;ENSG00000099968;ENSG00000100095;ENSG00000100364;ENSG00000100412;ENSG00000100889…	ARSD;NFIX;CD4;HEBP1;MARCO;CD74;GRN;ARHGAP31;TRIO;VCAN;ITIH1;YBX3;LAPTM4A;SCARB1;RBMS2;GNA11;ATRN;CD209;DPYSL2;CECR1;BCL2L13;SEZ6L;KIAA0930;ACO2;PCK2;PYGB;POFUT1;SAMHD1;STS;GLA;MAN2B1;SLC1A5;CPVL;SNX8;AHR;SUSD1;TBC1D12;DUSP3;EFTUD2;MS4A4A;DAP;CD86;CCDC88A;KYNU;NID1;NRP2;DENND1A;NPC2;FLVCR2;TGFBI;SCPEP1;COPA;NLN;NCKAP1L;NR4A1;LRP1;SOX4;CDC42EP1;PUDP;SH3BP4;EMILIN2;BTBD3;RIN2;EPHB2;CTSL;GOLM1;HAVCR2…	0.0808308	1.54711	0.025344	0.0581246	-0.294018	0.183333	0.416384	miR-124-3p/miR-92a-3p/miR-181d-5p/miR-320b/miR-532-3p	ENSG00000038427,ENSG00000073060,ENSG00000101346,ENSG00000115355,ENSG00000116962,ENSG00000123358,ENSG00000136826,ENSG00000138061,ENSG00000142192,ENSG00000146535,ENSG00000153823,ENSG00000163453,ENSG00000179241/ENSG00000136826,ENSG00000099968,ENSG00000138829,ENSG00000142192/ENSG00000123384,ENSG00000163453/ENSG00000038382,ENSG00000138061/ENSG00000104774	0.722/0.767/0.847/0.653/0.578	0.007/0.099/0.194/0.258/0.414	0.0765964524351276/0.546998953190353/0.709528341679035/0.709528341679035/0.909772483565077	0.248988	0.010428	0.231318	0.0175855	0.274402	0.0046154	0.7492	0.025673	0.73865	0.28566	0.28463	18	0	7	1	29	hsa04142 (Lysosome)	P00053 (T cell activation)	R-HSA-1660662 (Glycosphingolipid metabolism)	WP4217 (Ebola Virus Pathway on Host)	GO:0070371 (ERK1 and ERK2 cascade)
F:ME83	mediumorchid	54	ENSG00000015171;ENSG00000030419;ENSG00000073849;ENSG00000078596;ENSG00000079335;ENSG00000080839;ENSG00000101544;ENSG00000101695;ENSG00000101935;ENSG00000105866;ENSG00000106771;ENSG00000107679;ENSG00000107771;ENSG00000107779;ENSG00000109452;ENSG00000111371;ENSG00000113263;ENSG00000115365;ENSG00000117155;ENSG00000117868;ENSG00000125249;ENSG00000127334;ENSG00000127995;ENSG00000131437;ENSG00000134242…	ZMYND11;IKZF2;ST6GAL1;ITM2A;CDC14A;RBL1;ADNP2;RNF125;AMMECR1;SP4;TMEM245;PLEKHA1;CCSER2;BMPR1A;INPP4B;SLC38A1;ITK;LANCL1;SSX2IP;ESYT2;RAP2A;DYRK2;CASD1;KIF3A;PTPN22;ETS1;MDFIC;CNOT6L;SLAIN1;PRKACB;GPR174;ITGB1;CD226;FBXO32;TRAT1;CFAP97;ACSL6;TC2N;IL7R;LRRC8C;RASGRP1;THEMIS;ABCD2;MBLAC2;MEX3C;ZBTB38;CD28;IKZF1;NEMP2;STYX;FAM169A;TRAV9-2;PLCXD2;RP11-284N8.3	0.0790239	1.42554	0.0517666	0.103533	-0.341026	0.0141884	0.111838	miR-181d-5p/miR-92a-3p/miR-5585-3p/miR-124-3p/miR-320b	ENSG00000127334,ENSG00000176624,ENSG00000198780/ENSG00000030419,ENSG00000127334,ENSG00000198252/ENSG00000198252/ENSG00000127334,ENSG00000176624,ENSG00000198252,ENSG00000198780/ENSG00000176624	2.32/1.547/3.573/0.61/1.027	0.003/0.022/0.026/0.149/0.288	0.0298732394505876/0.0961547719896506/0.0961547719896506/0.408866682725814/0.633795477637181	0.205561	0.035406	0.163724	0.0951427	0.0951996	0.334032	0.52653	0.013452	0.22287	0.50318	0.57706	0	0	0	1	7	hsa04660 (T cell receptor signaling pathway)	P00028 (Heterotrimeric G-protein signaling pathway-rod outer segment phototransduction)	R-HSA-392517 (Rap1 signalling)	WP2583 (T-Cell Receptor and Co-stimulatory Signaling)	GO:0002521 (leukocyte differentiation)
F:ME36	coral	39	ENSG00000023318;ENSG00000067560;ENSG00000077549;ENSG00000086061;ENSG00000092199;ENSG00000100865;ENSG00000104388;ENSG00000105058;ENSG00000106245;ENSG00000107745;ENSG00000111348;ENSG00000113141;ENSG00000113732;ENSG00000116209;ENSG00000116473;ENSG00000116954;ENSG00000117118;ENSG00000117862;ENSG00000120656;ENSG00000120727;ENSG00000125037;ENSG00000131100;ENSG00000132581;ENSG00000134996;ENSG00000136238…	ERP44;RHOA;CAPZB;DNAJA1;HNRNPC;CINP;RAB2A;FAM32A;BUD31;MICU1;ARHGDIB;IK;ATP6V0E1;TMEM59;RAP1A;RRAGC;SDHB;TXNDC12;TAF12;PAIP2;EMC3;ATP6V1E1;SDF2;OSTF1;RAC1;ANXA7;MAP1LC3B;ATG3;ZMAT2;XRCC4;ARPC2;B2M;CDC26;KCMF1;MRFAP1;RP11-332M2.1;MYCBP;AATF;HIST1H4I	0.076142	-1.60727	0.00862069	0.027995	-0.374225	0.00821355	0.10969	miR-124-3p/miR-92a-3p	ENSG00000111348,ENSG00000131100,ENSG00000214114/ENSG00000214114	0.648/0.774	0.184/0.355	1/1	-0.205149	0.0357841	-0.144323	0.141869	-0.184389	0.059702	0.63376	0.35411	0.65019	0.22331	0.39242	0	2	0	2	0	hsa04722 (Neurotrophin signaling pathway)	P00034 (Integrin signalling pathway)	R-HSA-3928662 (EPHB-mediated forward signaling)	WP4542 (Overview of leukocyte-intrinsic Hippo pathway functions)	GO:0061919 (process utilizing autophagic mechanism)
F:ME99	navajowhite1	41	ENSG00000049541;ENSG00000051523;ENSG00000077348;ENSG00000087086;ENSG00000087460;ENSG00000088832;ENSG00000100300;ENSG00000102178;ENSG00000102898;ENSG00000103502;ENSG00000108528;ENSG00000125534;ENSG00000125818;ENSG00000125970;ENSG00000126432;ENSG00000129932;ENSG00000137161;ENSG00000138629;ENSG00000142694;ENSG00000157020;ENSG00000162236;ENSG00000164713;ENSG00000169223;ENSG00000170043;ENSG00000170619…	RFC2;CYBA;EXOSC5;FTL;GNAS;FKBP1A;TSPO;UBL4A;NUTF2;CDIPT;SLC25A11;PPDPF;PSMF1;RALY;PRDX5;DOHH;CNPY3;UBL7;EVA1B;SEC13;STX5;BRI3;LMAN2;TRAPPC1;COMMD5;BCL2L1;CFL1;ZNF622;CLTB;MSRA;SWI5;RNPEP;METRNL;CCDC71;LSM10;BCAP31;TUBB;GPATCH3;OSER1-AS1;ISY1;HEIH	0.0740121	-1.59436	0.00919238	0.027995	0.267102	0.999605	1	miR-1270/miR-124-3p	ENSG00000196230/ENSG00000196230	2.709/-0.5	0.061/0.796	0.672236374729127/1	-0.194526	0.0467593	-0.14418	0.142267	-0.0908171	0.35686	0.26777	0.17016	0.56638	0.075603	0.16672	0	0	1	0	0	hsa04961 (Endocrine and other factor-regulated calcium reabsorption)	P00016 (Cytoskeletal regulation by Rho GTPase)	R-HSA-204005 (COPII-mediated vesicle transport)	WP231 (TNF alpha Signaling Pathway)	GO:0048193 (Golgi vesicle transport)
F:ME103	mediumpurple4	37	ENSG00000022840;ENSG00000076662;ENSG00000090339;ENSG00000092203;ENSG00000101084;ENSG00000102144;ENSG00000111684;ENSG00000115956;ENSG00000119801;ENSG00000120709;ENSG00000121316;ENSG00000124731;ENSG00000130830;ENSG00000132475;ENSG00000135604;ENSG00000136026;ENSG00000136689;ENSG00000142657;ENSG00000149925;ENSG00000150991;ENSG00000156026;ENSG00000165030;ENSG00000167552;ENSG00000173011;ENSG00000174574…	RNF10;ICAM3;ICAM1;TOX4;C20orf24;PGK1;LPCAT3;PLEK;YPEL5;FAM53C;PLBD1;TREM1;MPP1;H3F3B;STX11;CKAP4;IL1RN;PGD;ALDOA;UBC;MCU;NFIL3;TUBA1A;TADA2B;AKIRIN1;B3GNT5;DAZAP2;FCAR;C5AR1;ATG7;SNORD89;RP1-229K20.5;AP5B1;RP11-750H9.5;RASSF5;CTB-61M7.2;MARCKS	0.0735907	1.58815	0.0164706	0.0432757	-0.298796	0.670507	0.868103	miR-124-3p	ENSG00000111684,ENSG00000165030	0.295	0.413	1	0.220217	0.0239874	0.218453	0.0251695	0.0987477	0.316246	0.60061	0.26639	0.28042	0.70708	0.07648	0	1	0	0	2	hsa05150 (Staphylococcus aureus infection)	P00024 (Glycolysis)	R-HSA-1482788 (Acyl chain remodelling of PC)	WP4629 (Computational Model of Aerobic Glycolysis)	GO:0016051 (carbohydrate biosynthetic process)
F:ME33	turquoise	456	ENSG00000002586;ENSG00000005194;ENSG00000008382;ENSG00000008988;ENSG00000014641;ENSG00000018610;ENSG00000027001;ENSG00000047249;ENSG00000047579;ENSG00000056050;ENSG00000056972;ENSG00000057663;ENSG00000063177;ENSG00000065518;ENSG00000069345;ENSG00000070785;ENSG00000071082;ENSG00000071462;ENSG00000072506;ENSG00000073578;ENSG00000074201;ENSG00000075239;ENSG00000075884;ENSG00000078668;ENSG00000082515…	CD99;CIAPIN1;MPND;RPS20;MDH1;CXorf56;MIPEP;ATP6V1H;DTNBP1;HPF1;TRAF3IP2;ATG5;RPL18;NDUFB4;DNAJA2;EIF2B3;RPL31;WBSCR22;HSD17B10;SDHA;CLNS1A;ACAT1;ARHGAP15;VDAC3;MRPL22;RPS5;AK6;AKR1B1;SEPHS1;C14orf166;RPL6;RPLP0;PEBP1;ERP29;IGBP1;FXYD5;FH;RANBP1;SNU13;HSCB;TOMM22;SAMM50;TIMM9;PFDN4;GID8;PQBP1;PIN4;PBDC1;BEX4;CMC2;AAGAB;C19orf53;RPS16;FBL;CCDC94;RPS19;RPL18A;H2AFV;SSBP1;CHCHD2;PDAP1;NUDT1;LSM5;CREB…	0.0692401	-1.37591	0.00460829	0.0166895	-0.309962	0.00900901	0.10969	miR-181d-5p/miR-92a-3p/miR-124-3p	ENSG00000174173/ENSG00000174173/ENSG00000130921,ENSG00000149089,ENSG00000174173	-0.912/-1.685/-1.811	0.908/0.994/1	1/1/1	-0.0510675	0.604905	0.00715916	0.942218	-0.046293	0.639116	0.69138	0.62615	0.1997	0.92435	0.42141	7	0	111	5	23	hsa03010 (Ribosome)	P00060 (Ubiquitin proteasome pathway)	R-HSA-422475 (Axon guidance)	WP477 (Cytoplasmic Ribosomal Proteins)	GO:0022613 (ribonucleoprotein complex biogenesis)
F:ME76	darkorange2	68	ENSG00000019995;ENSG00000021574;ENSG00000043093;ENSG00000055917;ENSG00000062650;ENSG00000065613;ENSG00000077684;ENSG00000078589;ENSG00000083642;ENSG00000087338;ENSG00000101972;ENSG00000106799;ENSG00000109787;ENSG00000110321;ENSG00000110367;ENSG00000111647;ENSG00000112245;ENSG00000112697;ENSG00000113194;ENSG00000113384;ENSG00000113580;ENSG00000118482;ENSG00000118985;ENSG00000119314;ENSG00000119844…	ZRANB1;SPAST;DCUN1D1;PUM2;WAPL;SLK;JADE1;P2RY10;PDS5B;GMCL1;STAG2;TGFBR1;KLF3;EIF4G2;DDX6;UHRF1BP1L;PTP4A1;TMEM30A;FAF2;GOLPH3;NR3C1;PHF3;ELL2;PTBP3;AFTPH;MXI1;GNA13;NAA50;PIK3CA;ATF1;UBE2G1;AP3B1;DCTN4;KRAS;TAOK3;ADAM10;TMOD3;BNIP2;SMAD4;GOLGA7;EIF4EBP2;NEK7;HS2ST1;UBASH3B;AZIN1;CCNYL1;PPP4R2;ZNF148;WDR82;BMT2;RAD21;PRPF18;RAB8B;BAG5;CASC4;CTNNB1;USP38;SP3;UGT8;PLEKHF2;SPTY2D1;YTHDF3;MIER1;PJA2;…	0.0679218	1.15392	0.25237	0.359761	0.307829	0.653915	0.86757	NA	NA	NA	NA	NA	0.119501	0.224663	0.0975361	0.322249	0.00236675	0.980883	0.013143	0.33969	0.56526	0.19384	0.37677	18	0	4	14	0	hsa05212 (Pancreatic cancer)	P04398 (p53 pathway feedback loops 2)	R-HSA-2470946 (Cohesin Loading onto Chromatin)	WP2870 (Extracellular vesicle-mediated signaling in recipient cells)	GO:0007059 (chromosome segregation)
F:ME73	royalblue	145	ENSG00000005483;ENSG00000008513;ENSG00000009413;ENSG00000009694;ENSG00000010818;ENSG00000047056;ENSG00000050030;ENSG00000055163;ENSG00000060237;ENSG00000063601;ENSG00000065308;ENSG00000069020;ENSG00000072364;ENSG00000074356;ENSG00000078687;ENSG00000080561;ENSG00000083168;ENSG00000088854;ENSG00000090061;ENSG00000091831;ENSG00000092847;ENSG00000094916;ENSG00000095951;ENSG00000096070;ENSG00000100354…	KMT2E;ST3GAL1;REV3L;TENM1;HIVEP2;WDR37;KIAA2022;CYFIP2;WNK1;MTMR1;TRAM2;MAST4;AFF4;NCBP3;TNRC6C;MID2;KAT6A;C20orf194;CCNK;ESR1;AGO1;CBX5;HIVEP1;BRPF3;TNRC6B;KIF3B;MTMR8;ARHGEF7;NFAT5;XYLT1;PLEKHA8;PBLD;MED13;DUSP16;CHD4;GLTSCR1L;USP34;CEP104;ASH1L;INVS;GPR75;KANSL1;ACO1;MED13L;ITPR2;CNOT1;PCNX4;HELB;KLHDC10;TAF4;ZNF317;ZNF236;TBC1D5;DIAPH1;ERCC5;RNF38;SLC7A1;DOPEY2;ABL2;CDC42BPA;ASXL2;VGLL4;MGAT5…	0.0670309	1.541	0.0272898	0.0609471	-0.288851	0.515602	0.768386	miR-92a-3p/miR-181d-5p/miR-124-3p/miR-320b	ENSG00000102908,ENSG00000173214,ENSG00000175556,ENSG00000179833/ENSG00000131374,ENSG00000179833/ENSG00000102908,ENSG00000108187,ENSG00000131374,ENSG00000162924,ENSG00000179833,ENSG00000219481/ENSG00000162924	0.847/0.927/0.028/0.04	0.066/0.156/0.414/0.576	0.729109976271549/0.85569511822036/1/1	0.247357	0.0109599	0.197057	0.0439184	0.106024	0.281723	0.28976	0.083127	0.0059018	0.58989	0.66628	0	0	0	0	0	hsa00310 (Lysine degradation)	P00029 (Huntington disease)	R-HSA-3700989 (Transcriptional Regulation by TP53)	WP170 (Nuclear Receptors)	GO:0006352 (DNA-templated transcription, initiation)
F:ME40	darkolivegreen2	31	ENSG00000041357;ENSG00000058729;ENSG00000061794;ENSG00000085871;ENSG00000092108;ENSG00000101843;ENSG00000103274;ENSG00000111845;ENSG00000117450;ENSG00000118363;ENSG00000125445;ENSG00000125870;ENSG00000127884;ENSG00000130348;ENSG00000135930;ENSG00000136143;ENSG00000136521;ENSG00000139684;ENSG00000140374;ENSG00000140612;ENSG00000140740;ENSG00000148834;ENSG00000155906;ENSG00000164167;ENSG00000166794…	PSMA4;RIOK2;MRPS35;MGST2;SCFD1;PSMD10;NUBP1;PAK1IP1;PRDX1;SPCS2;MRPS7;SNRPB2;ECHS1;QRSL1;EIF4E2;SUCLA2;NDUFB5;ESD;ETFA;SEC11A;UQCRC2;GSTO1;RMND1;LSM6;PPIB;FAM96A;DNAJC7;PDHB;HSPA4;FEZ2;PSMD1	0.0549845	NA	NA	NA	-0.313795	0.426745	0.688961	NA	NA	NA	NA	NA	-0.0527881	0.592778	-0.0147529	0.881261	0.00412721	0.96667	0.029994	0.16742	0.92241	0.63373	0.55532	0	0	96	0	2	hsa01200 (Carbon metabolism)	P00060 (Ubiquitin proteasome pathway)	R-HSA-156590 (Glutathione conjugation)	WP2359 (Parkin-Ubiquitin Proteasomal System pathway)	GO:0006790 (sulfur compound metabolic process)
F:ME1	lightcyan1	75	ENSG00000010322;ENSG00000011021;ENSG00000037757;ENSG00000044446;ENSG00000058600;ENSG00000064607;ENSG00000074657;ENSG00000080947;ENSG00000081791;ENSG00000100445;ENSG00000104365;ENSG00000105486;ENSG00000108465;ENSG00000108669;ENSG00000112659;ENSG00000114735;ENSG00000114841;ENSG00000115282;ENSG00000116580;ENSG00000117385;ENSG00000118369;ENSG00000123136;ENSG00000128159;ENSG00000128596;ENSG00000131067…	NISCH;CLCN6;MRI1;PHKA2;POLR3E;SUGP2;ZNF532;CROCCP3;KIAA0141;SDR39U1;IKBKB;LIG1;CDK5RAP3;CYTH1;CUL9;HEMK1;DNAH1;TTC31;GON4L;P3H1;USP35;DDX39A;TUBGCP6;CCDC136;GGT7;ZNF767P;FBXO18;PAN2;VAMP1;RANBP10;EPHX1;SNRNP200;ACAD8;TBRG1;ZNF276;C5orf45;BDH1;NXF1;SNED1;STK36;ANKZF1;UVSSA;RELL2;METTL17;RCCD1;SGK494;LENG8;SRRM2;SF1;INO80E;CES4A;AHSA2;PIGG;PHYKPL;CTD-2368P22.1;ANKLE2;NFATC2IP;P4HTM;FAM219B;POFUT2;K…	0.0514674	1.55545	0.0245518	0.0581236	-0.327927	0.0265319	0.166219	miR-4286/miR-320b/miR-532-3p/miR-23a-5p/miR-1270/miR-124-3p/miR-181d-5p/miR-92a-3p	ENSG00000010322,ENSG00000167978/ENSG00000010322,ENSG00000167978,ENSG00000168066/ENSG00000167978,ENSG00000197774/ENSG00000168066/ENSG00000167978/ENSG00000123136,ENSG00000143819,ENSG00000164620,ENSG00000167978,ENSG00000196123/ENSG00000198563/ENSG00000168066	2.616/1.797/2.01/2.839/2.105/0.505/0.893/0.12	0.008/0.012/0.027/0.054/0.109/0.156/0.322/0.57	0.0639367081913281/0.0639367081913281/0.09735190598318/0.148220229115236/0.239923131330647/0.28642490371553/0.506096429950432/0.784205599427985	0.278124	0.0040696	0.225806	0.0205515	0.13824	0.159622	0.67916	0.51447	0.041985	0.11811	0.74084	0	0	0	0	0	hsa04623 (Cytosolic DNA-sensing pathway)	P04375 (5HT3 type receptor mediated signaling pathway)	R-HSA-72203 (Processing of Capped Intron-Containing Pre-mRNA)	WP1584 (Type II diabetes mellitus)	GO:0000075 (cell cycle checkpoint)
F:ME74	firebrick2	20	ENSG00000067955;ENSG00000075303;ENSG00000095574;ENSG00000101911;ENSG00000111711;ENSG00000115540;ENSG00000117500;ENSG00000120992;ENSG00000129128;ENSG00000134758;ENSG00000134970;ENSG00000135535;ENSG00000149084;ENSG00000153767;ENSG00000156136;ENSG00000162980;ENSG00000163743;ENSG00000168283;ENSG00000196911;ENSG00000197045	CBFB;SLC25A40;IKZF5;PRPS2;GOLT1B;MOB4;TMED5;LYPLA1;SPCS3;RNF138;TMED7;CD164;HSD17B12;GTF2E1;DCK;ARL5A;RCHY1;BMI1;KPNA5;GMFB	0.0499637	1.26364	0.190867	0.28418	0.420134	0.048475	0.202989	miR-124-3p	ENSG00000162980	0.217	0.539	1	0.219876	0.0242124	0.18764	0.0552656	0.148707	0.130029	0.85832	0.38127	0.014809	0.40149	0.23405	0	0	0	0	0	hsa00230 (Purine metabolism)	P00023 (General transcription regulation)	R-HSA-8939243 (RUNX1 interacts with co-factors whose precise effect on RUNX1 targets is not known)	WP404 (Nucleotide Metabolism)	GO:0072522 (purine-containing compound biosynthetic process)
F:ME61	darkseagreen3	39	ENSG00000007255;ENSG00000008517;ENSG00000013725;ENSG00000079462;ENSG00000101400;ENSG00000103260;ENSG00000105699;ENSG00000109943;ENSG00000110448;ENSG00000114779;ENSG00000117090;ENSG00000122224;ENSG00000125648;ENSG00000126243;ENSG00000130956;ENSG00000133935;ENSG00000136717;ENSG00000143891;ENSG00000153563;ENSG00000160185;ENSG00000160654;ENSG00000167286;ENSG00000171130;ENSG00000172116;ENSG00000173272…	TRAPPC6A;IL32;CD6;PAFAH1B3;SNTA1;METRN;LSR;CRTAM;CD5;ABHD14B;SLAMF1;LY9;SLC25A23;LRFN3;HABP4;C14orf1;BIN1;GALM;CD8A;UBASH3A;CD3G;CD3D;ATP6V0E2;CD8B;MZT2A;MPI;LCK;HMCES;RASA3;CXCR3;SELM;CD3E;TRBC1;TRBC2;ZNF853;RP11-291B21.2;LIX1L;TRAC;TRBV7-9	0.0476855	NA	NA	NA	0.313469	0.687003	0.868476	NA	NA	NA	NA	NA	-0.0438813	0.656695	-0.0380218	0.700176	-0.0168075	0.864872	0.047775	0.34414	0.43495	0.74652	0.2933	6	1	8	4	2	hsa05340 (Primary immunodeficiency)	P00053 (T cell activation)	R-HSA-202430 (Translocation of ZAP-70 to Immunological synapse)	WP4585 (Cancer immunotherapy by PD-1 blockade)	GO:0042110 (T cell activation)
F:ME13	tomato	18	ENSG00000090989;ENSG00000100519;ENSG00000110330;ENSG00000124356;ENSG00000124786;ENSG00000143315;ENSG00000145439;ENSG00000145782;ENSG00000164073;ENSG00000164074;ENSG00000164118;ENSG00000166471;ENSG00000167380;ENSG00000171448;ENSG00000171817;ENSG00000174405;ENSG00000182400;ENSG00000261136	EXOC1;PSMC6;BIRC2;STAMBP;SLC35B3;PIGM;CBR4;ATG12;MFSD8;ABHD18;CEP44;TMEM41B;ZNF226;ZBTB26;ZNF540;LIG4;TRAPPC6B;RP11-37C7.3	0.0472239	-1.45501	0.0542759	0.106955	0.346461	0.48196	0.747684	miR-124-3p	ENSG00000090989	0.323	0.502	1	-0.188563	0.0540562	-0.203419	0.0374081	-0.124758	0.204783	0.70256	0.03679	0.96175	0.8011	0.88497	0	0	0	0	0	hsa04621 (NOD-like receptor signaling pathway)	P00006 (Apoptosis signaling pathway)	R-HSA-5688426 (Deubiquitination)	WP4352 (Ciliary landscape)	GO:0007033 (vacuole organization)
F:ME86	green4	27	ENSG00000013523;ENSG00000048471;ENSG00000049618;ENSG00000064393;ENSG00000082805;ENSG00000091157;ENSG00000103404;ENSG00000109906;ENSG00000124942;ENSG00000127124;ENSG00000127463;ENSG00000130338;ENSG00000130559;ENSG00000132846;ENSG00000136068;ENSG00000151914;ENSG00000155506;ENSG00000160007;ENSG00000163125;ENSG00000163820;ENSG00000169641;ENSG00000170145;ENSG00000174437;ENSG00000179981;ENSG00000180357…	ANGEL1;SNX29;ARID1B;HIPK2;ERC1;WDR7;USP31;ZBTB16;AHNAK;HIVEP3;EMC1;TULP4;CAMSAP1;ZBED3;FLNB;DST;LARP1;ARHGAP35;RPRD2;FYCO1;LUZP1;SIK2;ATP2A2;TSHZ1;ZNF609;GPATCH8;KIF13B	0.0443384	1.24228	0.19957	0.293872	-0.307847	0.175115	0.416384	NA	NA	NA	NA	NA	0.219904	0.0241935	0.176284	0.0720395	0.149994	0.126701	0.71224	0.36538	0.83688	0.014176	0.34917	0	0	0	0	0	hsa04510 (Focal adhesion)	NA (NA)	R-HSA-8939243 (RUNX1 interacts with co-factors whose precise effect on RUNX1 targets is not known)	WP306 (Focal Adhesion)	GO:0050879 (multicellular organismal movement)
F:ME50	magenta	258	ENSG00000003436;ENSG00000004866;ENSG00000005249;ENSG00000005961;ENSG00000006638;ENSG00000010278;ENSG00000011105;ENSG00000011638;ENSG00000013016;ENSG00000022267;ENSG00000029534;ENSG00000035403;ENSG00000041353;ENSG00000047597;ENSG00000047648;ENSG00000049323;ENSG00000050393;ENSG00000054356;ENSG00000061918;ENSG00000065534;ENSG00000066697;ENSG00000070182;ENSG00000072135;ENSG00000072422;ENSG00000073792…	TFPI;ST7;PRKAR2B;ITGA2B;TBXA2R;CD9;TSPAN9;TMEM159;EHD3;FHL1;ANK1;VCL;RAB27B;XK;ARHGAP6;LTBP1;MCUR1;PTPRN;GUCY1B3;MYLK;MSANTD3;SPTB;PTPN18;RHOBTB1;IGF2BP2;MGLL;TNS1;CDC14B;ITGB5;CTTN;GP6;TMEM40;SMOX;PTGS1;PRTFDC1;MARCH2;TPTEP1;GRAP2;PVALB;SLC8A3;SLA2;TUBB1;MYL9;E2F1;TNNC2;PGRMC1;PCYT1B;SYTL4;TSC22D1;SEC14L5;HOMER2;CA2;CABP5;SERPINE1;PDLIM1;ARHGAP21;SLC6A4;ABCC3;MMD;KIAA1211;PF4V1;VWF;ACRBP;SPARC;H…	0.0386306	NA	NA	NA	0.295935	0.839803	0.93778	miR-181d-5p/miR-92a-3p/miR-124-3p	ENSG00000177119/ENSG00000180573/ENSG00000177119,ENSG00000180573	-0.342/-1.116/-1.647	0.734/0.944/0.999	1/1/1	0.0606235	0.538994	0.0757654	0.442382	0.0781888	0.427882	0.72328	0.13895	0.025527	0.67375	0.29869	10	1	88	1	42	hsa04611 (Platelet activation)	P00011 (Blood coagulation)	R-HSA-109582 (Hemostasis)	WP383 (Striated Muscle Contraction Pathway)	GO:0050878 (regulation of body fluid levels)
F:ME122	lightcyan	169	ENSG00000006459;ENSG00000015479;ENSG00000033800;ENSG00000038219;ENSG00000039319;ENSG00000048828;ENSG00000051382;ENSG00000054523;ENSG00000065243;ENSG00000065413;ENSG00000068305;ENSG00000070269;ENSG00000071189;ENSG00000073910;ENSG00000075651;ENSG00000090376;ENSG00000100697;ENSG00000101596;ENSG00000102081;ENSG00000102805;ENSG00000103226;ENSG00000103994;ENSG00000104093;ENSG00000105778;ENSG00000107099…	KDM7A;MATR3;PIAS1;BOD1L1;ZFYVE16;FAM120A;PIK3CB;KIF1B;PKN2;ANKRD44;MEF2A;TMEM260;SNX13;FRY;PLD1;IRAK3;DICER1;SMCHD1;FMR1;CLN5;NOMO3;ZNF106;DMXL2;AVL9;DOCK8;CPEB3;NUFIP2;MTMR4;AKAP10;GALNT7;KLHL5;HIPK3;SOX6;GABRR2;MED23;HECA;QKI;COL4A3BP;CPEB4;XRN1;ACAP2;SLC35F5;STAM2;TCEANC2;EDEM3;OGFRL1;SPATA1;BAZ2B;RAP2C;ZNF137P;BTN2A3P;CCDC93;RHOT1;DOCK4;MKLN1;TMOD2;MBD4;PHF20L1;ZSWIM6;CHSY1;KIAA0907;SLF1;AMPD…	0.0376128	1.1257	0.248045	0.357399	0.307374	0.574596	0.817735	miR-320b/miR-124-3p	ENSG00000213462/ENSG00000154429,ENSG00000165029,ENSG00000213462	-0.114/-0.818	0.656/0.958	1/1	0.071419	0.46907	0.0301299	0.76028	0.0112447	0.909358	0.40626	0.45499	0.028117	0.13938	0.90102	0	0	0	0	0	hsa04914 (Progesterone-mediated oocyte maturation)	P00030 (Hypoxia response via HIF activation)	R-HSA-3214842 (HDMs demethylate histones)	WP2857 (Mesodermal Commitment Pathway)	GO:0008214 (protein dealkylation)
F:ME65	mistyrose	24	ENSG00000005108;ENSG00000050628;ENSG00000105855;ENSG00000113520;ENSG00000115602;ENSG00000131016;ENSG00000133101;ENSG00000137941;ENSG00000140287;ENSG00000149516;ENSG00000149534;ENSG00000154269;ENSG00000158715;ENSG00000159216;ENSG00000163751;ENSG00000169224;ENSG00000178538;ENSG00000179348;ENSG00000179639;ENSG00000198400;ENSG00000246363;ENSG00000257156;ENSG00000260947;ENSG00000263961	THSD7A;PTGER3;ITGB8;IL4;IL1RL1;AKAP12;CCNA1;TTLL7;HDC;MS4A3;MS4A2;ENPP3;SLC45A3;RUNX1;CPA3;GCSAML;CA8;GATA2;FCER1A;NTRK1;RP11-13A1.1;RP11-13A1.3;RP11-384P7.7;C1orf186	0.0339057	1.42613	0.0580545	0.111676	0.473622	0.000408552	0.054746	NA	NA	NA	NA	NA	0.19951	0.041305	0.170501	0.0820429	0.0791158	0.422409	0.87756	0.4281	0.47946	0.038881	0.086644	3	0	0	1	0	hsa05310 (Asthma)	P04398 (p53 pathway feedback loops 2)	R-HSA-2730905 (Role of LAT2/NTAL/LAB on calcium mobilization)	WP2849 (Hematopoietic Stem Cell Differentiation)	GO:0002683 (negative regulation of immune system process)
F:ME54	mediumpurple3	75	ENSG00000048462;ENSG00000117399;ENSG00000123352;ENSG00000132465;ENSG00000133328;ENSG00000170476;ENSG00000178445;ENSG00000211592;ENSG00000211598;ENSG00000211611;ENSG00000211625;ENSG00000211637;ENSG00000211640;ENSG00000211644;ENSG00000211648;ENSG00000211649;ENSG00000211651;ENSG00000211652;ENSG00000211653;ENSG00000211659;ENSG00000211660;ENSG00000211662;ENSG00000211663;ENSG00000211666;ENSG00000211668…	TNFRSF17;CDC20;SPATS2;JCHAIN;HRASLS2;MZB1;GLDC;IGKC;IGKV4-1;IGKV6-21;IGKV3D-20;IGLV4-69;IGLV6-57;IGLV1-51;IGLV1-47;IGLV7-46;IGLV1-44;IGLV7-43;IGLV1-40;IGLV3-25;IGLV2-23;IGLV3-21;IGLV3-19;IGLV2-14;IGLV2-11;IGLV3-10;IGLV3-9;IGLV3-1;IGLC2;IGLC3;IGLC7;IGHA2;IGHG4;IGHG2;IGHA1;IGHG1;IGHG3;IGHV6-1;IGHV2-5;IGHV3-7;IGHV3-11;IGHV3-13;IGHV3-15;IGHV1-18;IGHV3-20;IGHV3-21;IGHV3-23;IGHV3-33;IGHV4-34;IGHV4-39;I…	0.0323796	-0.883444	0.708767	0.846749	NA	NA	NA	NA	NA	NA	NA	NA	-0.0340224	0.730431	-0.0332591	0.736254	-0.141299	0.150498	0.36066	0.56138	0.77963	0.028507	0.71523	0	0	0	0	0	hsa00630 (Glyoxylate and dicarboxylate metabolism)	NA (NA)	R-HSA-1482839 (Acyl chain remodelling of PE)	WP4240 (Regulation of sister chromatid separation at the metaphase-anaphase transition)	GO:0033622 (integrin activation)
F:ME49	yellow3	36	ENSG00000005022;ENSG00000031698;ENSG00000044574;ENSG00000065427;ENSG00000069849;ENSG00000075415;ENSG00000084090;ENSG00000092820;ENSG00000099783;ENSG00000101052;ENSG00000102317;ENSG00000102900;ENSG00000103544;ENSG00000115241;ENSG00000118705;ENSG00000126067;ENSG00000134684;ENSG00000135624;ENSG00000137364;ENSG00000143870;ENSG00000150753;ENSG00000153066;ENSG00000155660;ENSG00000165775;ENSG00000167004…	SLC25A5;SARS;HSPA5;KARS;ATP1B3;SLC25A3;STARD7;EZR;HNRNPM;IFT52;RBM3;NUP93;C16orf62;PPM1G;RPN2;PSMB2;YARS;CCT7;TPMT;PDIA6;CCT5;TXNDC11;PDIA4;FUNDC2;PDIA3;PHB;CALR;RCC1;KPNA2;SUMO3;DRG1;POLR3C;UROS;XRCC6;ABCF1;VDAC1	0.0314491	1.26746	0.159399	0.248366	-0.303722	0.579737	0.817735	miR-320b/miR-181d-5p/miR-124-3p/miR-4286	ENSG00000044574,ENSG00000143870,ENSG00000188690/ENSG00000044574,ENSG00000143870/ENSG00000044574,ENSG00000102317,ENSG00000167085,ENSG00000188690/ENSG00000044574	2.531/2.32/1.016/2.657	0.001/0.015/0.047/0.064	0.0161192516939766/0.0812952332484191/0.170746937572311/0.176780787643125	0.20006	0.0407367	0.216359	0.0266364	0.12918	0.18906	0.56813	0.52046	0.07186	0.72616	0.33607	3	0	2	1	3	hsa04141 (Protein processing in endoplasmic reticulum)	P02746 (Heme biosynthesis)	R-HSA-379716 (Cytosolic tRNA aminoacylation)	WP3613 (Photodynamic therapy-induced unfolded protein response)	GO:0006457 (protein folding)
F:ME81	lightskyblue4	22	ENSG00000110660;ENSG00000111728;ENSG00000115306;ENSG00000115896;ENSG00000116106;ENSG00000134460;ENSG00000143515;ENSG00000144749;ENSG00000147044;ENSG00000147324;ENSG00000147364;ENSG00000150347;ENSG00000151150;ENSG00000154122;ENSG00000168234;ENSG00000168280;ENSG00000168672;ENSG00000171791;ENSG00000177707;ENSG00000180884;ENSG00000197635;ENSG00000234332	SLC35F2;ST8SIA1;SPTBN1;PLCL1;EPHA4;IL2RA;ATP8B2;LRIG1;CASK;MFHAS1;FBXO25;ARID5B;ANK3;ANKH;TTC39C;KIF5C;FAM84B;BCL2;NECTIN3;ZNF792;DPP4;BCAS2P2	0.0299833	1.361	0.101961	0.179773	0.304358	0.749157	0.880588	miR-92a-3p/miR-124-3p	ENSG00000147044,ENSG00000180884/ENSG00000147044,ENSG00000147324	2.039/0.815	0.025/0.203	0.272523523824343/1	0.314357	0.00109135	0.293111	0.00240944	0.116896	0.235006	0.19604	0.87734	0.17238	0.80629	0.22904	0	0	0	0	3	hsa04630 (JAK-STAT signaling pathway)	P00031 (Inflammation mediated by chemokine and cytokine signaling pathway)	R-HSA-445095 (Interaction between L1 and Ankyrins)	WP4148 (Splicing factor NOVA regulated synaptic proteins)	GO:0061564 (axon development)
F:ME72	black	269	ENSG00000000457;ENSG00000001167;ENSG00000010072;ENSG00000011114;ENSG00000021776;ENSG00000023287;ENSG00000032219;ENSG00000037749;ENSG00000047410;ENSG00000048649;ENSG00000049883;ENSG00000052723;ENSG00000054267;ENSG00000054983;ENSG00000055208;ENSG00000058063;ENSG00000058272;ENSG00000062725;ENSG00000067900;ENSG00000068878;ENSG00000070961;ENSG00000071073;ENSG00000071243;ENSG00000071537;ENSG00000072415…	SCYL3;NFYA;SPRTN;BTBD7;AQR;RB1CC1;ARID4A;MFAP3;TPR;RSF1;PTCD2;SIKE1;ARID4B;GALC;TAB2;ATP11B;PPP1R12A;APPBP2;ROCK1;PSME4;ATP2B1;MGAT4A;ING3;SEL1L;MPP5;KDM5A;IPCEF1;SEMA3C;PAG1;PIK3C3;ITCH;SENP1;SMARCA2;CYLD;YTHDC1;ATRX;WDFY1;GPATCH2L;SPTLC1;PAPOLA;OSBPL8;AC013461.1;MAP3K1;JAK2;HMGXB4;SOS2;NIN;KIAA0586;TMED8;HIF1A;EIF5;PPP4R3A;ANKRD12;MIB1;RIOK3;PARP4;INTS6;CTCF;RBL2;ZDHHC2;PIK3CG;LMBR1;SETX;RAB11F…	0.0253491	1.58495	0.020085	0.050781	0.334567	0.0349902	0.185581	miR-124-3p/miR-92a-3p/miR-320b/miR-4286/miR-181d-5p/miR-550a-3p/miR-23a-5p/miR-1270/miR-532-3p	ENSG00000144802,ENSG00000001167,ENSG00000085224,ENSG00000100485,ENSG00000104219,ENSG00000116704,ENSG00000134294,ENSG00000134313,ENSG00000136536,ENSG00000136874,ENSG00000144357,ENSG00000145246,ENSG00000153187,ENSG00000153214,ENSG00000165195,ENSG00000166503,ENSG00000168172,ENSG00000173473,ENSG00000178917,ENSG00000196912,ENSG00000204406,ENSG00000215301/ENSG00000085224,ENSG00000100796,ENSG00000134294…	0.71/0.922/1.031/1.339/0.714/0.933/1.562/0.828/0.039	0.001/0.01/0.026/0.086/0.159/0.168/0.18/0.339/0.598	0.00629484886264241/0.057263869092811/0.0963177851475568/0.237330830449499/0.282816236884548/0.282816236884548/0.282816236884548/0.465705378952462/0.730560303440667	0.211807	0.0300772	0.169139	0.0845524	0.0785498	0.425746	0.56509	0.19607	0.65755	0.35296	0.19744	0	1	0	8	18	hsa04622 (RIG-I-like receptor signaling pathway)	P00047 (PDGF signaling pathway)	R-HSA-168638 (NOD1/2 Signaling Pathway)	WP437 (EGF/EGFR Signaling Pathway)	GO:0032886 (regulation of microtubule-based process)
F:ME78	magenta3	28	ENSG00000074966;ENSG00000081177;ENSG00000085788;ENSG00000100722;ENSG00000102763;ENSG00000104218;ENSG00000107890;ENSG00000119041;ENSG00000119397;ENSG00000133706;ENSG00000135905;ENSG00000135951;ENSG00000136891;ENSG00000138443;ENSG00000143971;ENSG00000153107;ENSG00000155561;ENSG00000160336;ENSG00000164953;ENSG00000169239;ENSG00000171467;ENSG00000173517;ENSG00000182670;ENSG00000196177;ENSG00000196305…	TXK;EXD2;DDHD2;ZC3H14;VWA8;CSPP1;ANKRD26;GTF3C3;CNTRL;LARS;DOCK10;TSGA10;TEX10;ABI2;ETAA1;ANAPC1;NUP205;ZNF761;TMEM67;CA5B;ZNF318;PEAK1;TTC3;ACADSB;IARS;ZNF84;CEP290;HCG18	0.0244109	1.32478	0.120952	0.200531	0.313239	0.680131	0.868103	miR-92a-3p/miR-1270/miR-550a-3p/miR-124-3p	ENSG00000085788,ENSG00000173517/ENSG00000171467/ENSG00000171467/ENSG00000085788	1.798/3.09/2.502/-0.119	0.039/0.042/0.075/0.662	0.231739194797126/0.231739194797126/0.273548793851149/1	0.262832	0.00675307	0.22093	0.0235237	0.200016	0.0407821	0.50421	0.63819	0.81542	0.32827	0.19444	0	0	0	1	0	hsa00970 (Aminoacyl-tRNA biosynthesis)	NA (NA)	R-HSA-2408517 (SeMet incorporation into proteins)	WP4656 (Joubert Syndrome)	GO:0018212 (peptidyl-tyrosine modification)
F:ME31	blue3	20	ENSG00000013561;ENSG00000088986;ENSG00000091947;ENSG00000100591;ENSG00000106400;ENSG00000113621;ENSG00000122705;ENSG00000123131;ENSG00000123595;ENSG00000143256;ENSG00000143553;ENSG00000150779;ENSG00000152147;ENSG00000158042;ENSG00000169976;ENSG00000170175;ENSG00000170291;ENSG00000175334;ENSG00000183978;ENSG00000204568	RNF14;DYNLL1;TMEM101;AHSA1;ZNHIT1;TXNDC15;CLTA;PRDX4;RAB9A;PFDN2;SNAPIN;TIMM8B;GEMIN6;MRPL17;SF3B5;CHRNB1;ELP5;BANF1;COA3;MRPS18B	0.0235192	-1.53454	0.0255922	0.0581246	-0.408921	0.0455882	0.202989	miR-181d-5p/miR-124-3p	ENSG00000113621/ENSG00000113621,ENSG00000158042	2.215/0.911	0.098/0.175	0.963376783178611/0.963376783178611	-0.305535	0.00152713	-0.250083	0.0100839	-0.116069	0.238355	0.36953	0.14087	0.11339	0.52244	0.71364	0	0	0	0	0	hsa04961 (Endocrine and other factor-regulated calcium reabsorption)	P00044 (Nicotinic acetylcholine receptor signaling pathway)	R-HSA-432722 (Golgi Associated Vesicle Biogenesis)	WP4536 (Genes related to primary cilium development (based on CRISPR))	GO:0140053 (mitochondrial gene expression)
F:ME70	lightpink2	27	ENSG00000014123;ENSG00000047315;ENSG00000048052;ENSG00000067248;ENSG00000077232;ENSG00000079819;ENSG00000083520;ENSG00000085832;ENSG00000089682;ENSG00000100815;ENSG00000102893;ENSG00000103540;ENSG00000104427;ENSG00000106034;ENSG00000113810;ENSG00000120008;ENSG00000122008;ENSG00000132294;ENSG00000136381;ENSG00000151233;ENSG00000155100;ENSG00000157483;ENSG00000164830;ENSG00000164961;ENSG00000168538…	UFL1;POLR2B;HDAC9;DHX29;DNAJC10;EPB41L2;DIS3;EPS15;RBM41;TRIP11;PHKB;CCP110;ZC2HC1A;CPED1;SMC4;WDR11;POLK;EFR3A;IREB2;GXYLT1;OTUD6B;MYO1E;OXR1;KIAA0196;TRAPPC11;CSGALNACT2;LACC1	0.0163263	1.3274	0.121217	0.200531	0.386997	0.03806	0.18889	miR-550a-3p/miR-124-3p	ENSG00000089682/ENSG00000179630	2.539/-0.083	0.072/0.649	0.79239655652538/1	0.268797	0.005561	0.216102	0.0268214	0.16699	0.0886373	0.7515	0.46796	0.7869	0.30012	0.4364	0	0	0	0	0	hsa00532 (Glycosaminoglycan biosynthesis)	P05912 (Dopamine receptor mediated signaling pathway)	R-HSA-6782210 (Gap-filling DNA repair synthesis and ligation in TC-NER)	WP4286 (Genotoxicity pathway)	GO:0009791 (post-embryonic development)
F:ME93	floralwhite	71	ENSG00000005882;ENSG00000007202;ENSG00000008710;ENSG00000010292;ENSG00000038358;ENSG00000043143;ENSG00000065989;ENSG00000070814;ENSG00000077235;ENSG00000089597;ENSG00000090975;ENSG00000097007;ENSG00000099381;ENSG00000100105;ENSG00000100403;ENSG00000101445;ENSG00000103257;ENSG00000103966;ENSG00000104885;ENSG00000105738;ENSG00000105953;ENSG00000106290;ENSG00000108557;ENSG00000110514;ENSG00000114867…	PDK2;KIAA0100;PKD1;NCAPD2;EDC4;JADE2;PDE4A;TCOF1;GTF3C1;GANAB;PITPNM2;ABL1;SETD1A;PATZ1;ZC3H7B;PPP1R16B;SLC7A5;EHD4;DOT1L;SIPA1L3;OGDH;TAF6;RAI1;MADD;EIF4G1;PRR12;AHDC1;NFATC1;ACLY;NUMA1;MAPKBP1;ITGB7;ESYT1;ANKRD52;POLG;HYOU1;PLBD2;LRRC14;ADCY9;GALNT10;FOXK1;DCHS1;MAPK7;WDR81;IRF2BP2;LETM1;HIC2;CLSTN1;FBXL14;HCFC1;DAG1;ZBTB4;PLEC;MEX3D;ZFP41;CBX6;BCL9L;TMEM201;NCOR2;MYO18A;MVB12B;FLNA;NOP9;CDC42B…	0.0154402	1.51031	0.029651	0.065135	-0.307475	0.0626374	0.22284	miR-23a-5p/miR-124-3p/miR-550a-3p/miR-532-3p/miR-92a-3p	ENSG00000007202/ENSG00000007202,ENSG00000137497,ENSG00000149428,ENSG00000196924,ENSG00000196943/ENSG00000149428/ENSG00000007202/ENSG00000043143	2.894/0.56/1.572/1.371/0.175	0.05/0.121/0.174/0.209/0.54	0.546551341420387/0.57351924897505/0.57351924897505/0.57351924897505/1	0.256117	0.00836075	0.21947	0.0244824	0.186656	0.0565793	0.30333	0.9359	0.72951	0.23084	0.39861	0	0	0	0	0	hsa05416 (Viral myocarditis)	P00008 (Axon guidance mediated by Slit/Robo)	R-HSA-3247509 (Chromatin modifying enzymes)	WP2453 (TCA Cycle and Deficiency of Pyruvate Dehydrogenase complex (PDHc))	GO:0034405 (response to fluid shear stress)
F:ME48	lightcoral	49	ENSG00000058262;ENSG00000065978;ENSG00000067225;ENSG00000070756;ENSG00000074800;ENSG00000084623;ENSG00000084754;ENSG00000090621;ENSG00000100129;ENSG00000100316;ENSG00000100353;ENSG00000102181;ENSG00000105373;ENSG00000106682;ENSG00000108828;ENSG00000108829;ENSG00000110108;ENSG00000111640;ENSG00000118816;ENSG00000119487;ENSG00000125651;ENSG00000130159;ENSG00000130811;ENSG00000133597;ENSG00000137309…	SEC61A1;YBX1;PKM;PABPC1;ENO1;EIF3I;HADHA;PABPC4;EIF3L;RPL3;EIF3D;CD99L2;GLTSCR2;EIF4H;VAT1;LRRC59;TMEM109;GAPDH;CCNI;MAPKAP1;GTF2F1;ECSIT;EIF3G;ADCK2;HMGA1;HDGF;NONO;SURF4;VPS51;PTDSS1;C12orf43;AMFR;AP2M1;EEF2;SLC25A6;ZNF581;QARS;PSMD2;P4HB;ASB13;C6orf106;ANXA6;SND1;DDRGK1;PHB2;DDOST;DYNLL2;CTD-2267D19.3;RP11-371A22.1	0.0153961	1.30217	0.122824	0.200713	-0.301693	0.476636	0.747684	miR-124-3p	ENSG00000147140,ENSG00000185624	0.014	0.549	1	0.233771	0.0163895	0.238895	0.0141165	0.159233	0.104698	0.36779	0.42898	0.22311	0.18349	0.7735	0	1	10	2	3	hsa03013 (RNA transport)	P00024 (Glycolysis)	R-HSA-72766 (Translation)	WP107 (Translation Factors)	GO:0002181 (cytoplasmic translation)
F:ME95	lightslateblue	33	ENSG00000011304;ENSG00000055070;ENSG00000068354;ENSG00000071051;ENSG00000100139;ENSG00000100242;ENSG00000100413;ENSG00000102119;ENSG00000103264;ENSG00000105323;ENSG00000108312;ENSG00000124155;ENSG00000126767;ENSG00000136877;ENSG00000141522;ENSG00000141564;ENSG00000141568;ENSG00000148339;ENSG00000154217;ENSG00000158792;ENSG00000173456;ENSG00000177733;ENSG00000182162;ENSG00000184216;ENSG00000184640…	PTBP1;SZRD1;TBC1D25;NCK2;MICALL1;SUN2;POLR3H;EMD;FBXO31;HNRNPUL1;UBTF;PIGT;ELK1;FPGS;ARHGDIA;RPTOR;FOXK2;SLC25A25;PITPNC1;SPATA2L;RNF26;HNRNPA0;P2RY8;IRAK1;sept.9;TNFAIP8L1;BCR;FAM53B;TBC1D9B;ZNF628;IFRD2;ZBTB22;RBM15B	0.0132323	1.37333	0.0866496	0.154814	0.298284	0.808653	0.918301	miR-124-3p/miR-550a-3p/miR-92a-3p	ENSG00000100242,ENSG00000102119,ENSG00000136877,ENSG00000197226/ENSG00000259956/ENSG00000071051	1.103/2.338/0.941	0.035/0.087/0.31	0.388643350209376/0.480376400213776/1	0.232657	0.0169236	0.215635	0.0271597	0.0849514	0.38889	0.47117	0.26284	0.50991	0.5434	0.3861	0	0	0	0	0	hsa05140 (Leishmaniasis)	P00054 (Toll receptor signaling pathway)	R-HSA-72163 (mRNA Splicing - Major Pathway)	WP2637 (Structural Pathway of Interleukin 1 (IL-1))	GO:0006383 (transcription by RNA polymerase III)
F:ME7	thistle3	45	ENSG00000011451;ENSG00000020129;ENSG00000062822;ENSG00000067057;ENSG00000095059;ENSG00000100023;ENSG00000103326;ENSG00000103335;ENSG00000104866;ENSG00000105662;ENSG00000107404;ENSG00000108591;ENSG00000108784;ENSG00000119403;ENSG00000124574;ENSG00000124608;ENSG00000129968;ENSG00000130511;ENSG00000130758;ENSG00000133619;ENSG00000136286;ENSG00000136699;ENSG00000141556;ENSG00000148334;ENSG00000148337…	WIZ;NCDN;POLD1;PFKP;DHPS;PPIL2;CAPN15;PIEZO1;PPP1R37;CRTC1;DVL1;DRG2;NAGLU;PHF19;ABCC10;AARS2;ABHD17A;SSBP4;MAP3K10;KRBA1;MYO1G;SMPD4;TBCD;PTGES2;CIZ1;FUK;NOL6;MFSD3;ABHD15;THOP1;ZDHHC24;ANAPC2;GTPBP6;PACS2;MROH1;SCRIB;SGSH;FBXL6;MTA1;C19orf68;DMWD;NOC2L;SPOUT1;EHMT2;SLC26A6	0.0126858	1.31245	0.115728	0.19911	-0.274784	0.990659	1	miR-124-3p/miR-181d-5p/miR-92a-3p	ENSG00000108591,ENSG00000124574,ENSG00000148334,ENSG00000182979/ENSG00000182979/ENSG00000148334	0.793/1.404/0.631	0.091/0.208/0.397	0.997123184443085/1/1	0.241703	0.012991	0.199401	0.0414175	0.143076	0.14538	0.63546	0.88555	0.60197	0.6578	0.37849	0	0	0	0	0	hsa00531 (Glycosaminoglycan degradation)	P00013 (Cell cycle)	R-HSA-2206281 (Mucopolysaccharidoses)	WP3594 (Circadian rhythm related genes)	GO:0043583 (ear development)
F:ME46	darkturquoise	132	ENSG00000006534;ENSG00000010327;ENSG00000010704;ENSG00000012061;ENSG00000014914;ENSG00000020181;ENSG00000028277;ENSG00000060558;ENSG00000068724;ENSG00000073008;ENSG00000074964;ENSG00000075240;ENSG00000082014;ENSG00000085265;ENSG00000089041;ENSG00000090776;ENSG00000092051;ENSG00000099337;ENSG00000100280;ENSG00000101220;ENSG00000101337;ENSG00000102870;ENSG00000103042;ENSG00000103066;ENSG00000103249…	ALDH3B1;STAB1;HFE;ERCC1;MTMR11;ADGRA2;POU2F2;GNA15;TTC7A;PVR;ARHGEF10L;GRAMD4;SMARCD3;FCN1;P2RX7;EFNB1;JPH4;KCNK6;AP1B1;C20orf27;TM9SF4;ZNF629;SLC38A7;PLA2G15;CLCN7;BMF;LILRB1;CD33;CLIP2;RASSF4;MS4A6A;IL10RA;CHKA;H2AFY;LOXL3;MYCL;AKR1A1;SLC46A2;SNX21;IQSEC2;CDKN1A;SH3TC1;C16orf70;PNKD;IRF5;SLC27A1;TRPM4;KCNC3;LRRC41;DLG4;AGAP3;CTIF;DAGLA;SLC37A2;TTYH3;NMT1;FAM129B;MYO7A;GALNT6;RTN1;ARHGAP17;ASGR1…	0.0124218	1.43506	0.0428437	0.0869857	0.316453	0.37592	0.667788	miR-4286/miR-92a-3p/miR-124-3p	ENSG00000124762/ENSG00000124762/ENSG00000124762,ENSG00000143390,ENSG00000143537	1.357/-0.446/-0.571	0.217/0.774/0.883	1/1/1	0.181091	0.0644959	0.157018	0.109679	0.234072	0.0162479	0.66547	0.77281	0.59581	0.1763	0.78571	1	0	1	0	0	hsa05152 (Tuberculosis)	P00053 (T cell activation)	R-HSA-2672351 (Stimuli-sensing channels)	WP2197 (Endothelin Pathways)	GO:0006898 (receptor-mediated endocytosis)
F:ME51	palevioletred2	41	ENSG00000086232;ENSG00000100225;ENSG00000100568;ENSG00000105971;ENSG00000114861;ENSG00000124098;ENSG00000130227;ENSG00000130544;ENSG00000141627;ENSG00000144580;ENSG00000153814;ENSG00000168118;ENSG00000184110;ENSG00000198695;ENSG00000198712;ENSG00000198727;ENSG00000198744;ENSG00000198763;ENSG00000198786;ENSG00000198804;ENSG00000198840;ENSG00000198886;ENSG00000198888;ENSG00000198899;ENSG00000198938…	EIF2AK1;FBXO7;VTI1B;CAV2;FOXP1;FAM210B;XPO7;ZNF557;DYM;CNOT9;JAZF1;RAB4A;EIF3C;MT-ND6;MT-CO2;MT-CYB;MTCO3P12;MT-ND2;MT-ND5;MT-CO1;MT-ND3;MT-ND4;MT-ND1;MT-ATP6;MT-CO3;MT-RNR2;MT-TP;MT-RNR1;MT-ND4L;MTND2P28;MTND1P23;MT-ATP8;MTCO2P12;MTCO1P12;MTND4P12;MTATP6P1;EEF1A1P19;MTRNR2L8;MTCO1P40;RNF115;MTRNR2L12	0.0116361	1.49922	0.0307648	0.0656697	0.401321	0.0336525	0.185581	NA	NA	NA	NA	NA	0.205751	0.0352332	0.217914	0.0255399	0.146602	0.135616	0.63508	0.89797	0.89611	0.45332	0.97553	8	0	4	3	9	hsa05012 (Parkinson disease)	P00001 (Adrenaline and noradrenaline biosynthesis)	R-HSA-163200 (Respiratory electron transport, ATP synthesis by chemiosmotic coupling, and heat production by uncoupling proteins.)	WP111 (Electron Transport Chain (OXPHOS system in mitochondria))	GO:0009141 (nucleoside triphosphate metabolic process)
F:ME45	navajowhite	28	ENSG00000001036;ENSG00000026025;ENSG00000088992;ENSG00000100097;ENSG00000100220;ENSG00000100577;ENSG00000103811;ENSG00000106605;ENSG00000107262;ENSG00000109113;ENSG00000110442;ENSG00000111275;ENSG00000112799;ENSG00000115234;ENSG00000115350;ENSG00000117362;ENSG00000131981;ENSG00000132792;ENSG00000134802;ENSG00000143545;ENSG00000148655;ENSG00000155463;ENSG00000162734;ENSG00000165475;ENSG00000170275…	FUCA2;VIM;TESC;LGALS1;RTCB;GSTZ1;CTSH;BLVRA;BAG1;RAB34;COMMD9;ALDH2;LY86;SNX17;POLE4;APH1A;LGALS3;CTNNBL1;SLC43A3;RAB13;C10orf11;OXA1L;PEA15;CRYL1;CRTAP;CCDC149;ANXA2;S100A10	0.00566629	1.17676	0.267536	0.373436	-0.40086	0.00308285	0.0954416	NA	NA	NA	NA	NA	0.177079	0.0707448	0.201697	0.0390844	0.171588	0.0800824	0.77262	0.20734	0.13319	0.54468	0.32578	0	0	0	0	1	hsa00040 (Pentose and glucuronate interconversions)	P04372 (5-Hydroxytryptamine degredation)	R-HSA-75205 (Dissolution of Fibrin Clot)	WP98 (Prostaglandin Synthesis and Regulation)	GO:1990778 (protein localization to cell periphery)
F:ME85	firebrick3	31	ENSG00000006125;ENSG00000009954;ENSG00000015676;ENSG00000047849;ENSG00000087269;ENSG00000089737;ENSG00000101868;ENSG00000103047;ENSG00000115504;ENSG00000116127;ENSG00000125355;ENSG00000128908;ENSG00000131558;ENSG00000132718;ENSG00000135372;ENSG00000138674;ENSG00000139977;ENSG00000148606;ENSG00000151779;ENSG00000154310;ENSG00000160208;ENSG00000163399;ENSG00000165434;ENSG00000166750;ENSG00000167986…	AP2B1;BAZ1B;NUDCD3;MAP4;NOP14;DDX24;POLA1;TANGO6;EHBP1;ALMS1;TMEM255A;INO80;EXOC4;SYT11;NAT10;SEC31A;NAA30;POLR3A;NBAS;TNIK;RRP1B;ATP1A1;PGM2L1;SLFN5;DDB1;PTPN9;VANGL1;CKAP5;SF3B3;LRBA;SYNRG	0.0051013	1.16514	0.277668	0.379669	0.310674	0.63995	0.866195	miR-92a-3p/miR-124-3p/miR-181d-5p	ENSG00000101868,ENSG00000173218/ENSG00000101868,ENSG00000169410,ENSG00000173218/ENSG00000173218	1.696/0.878/1.776	0.047/0.112/0.148	0.514000014693205/0.543526515677599/0.543526515677599	0.212168	0.0297916	0.182126	0.0629585	0.152779	0.119725	0.5573	0.14918	0.22335	0.49134	0.31086	0	0	0	0	0	hsa04961 (Endocrine and other factor-regulated calcium reabsorption)	P05734 (Synaptic vesicle trafficking)	R-HSA-5696394 (DNA Damage Recognition in GG-NER)	WP702 (Metapathway biotransformation Phase I and II)	GO:0104004 (cellular response to environmental stimulus)
F:ME57	orangered1	34	ENSG00000065923;ENSG00000081052;ENSG00000082438;ENSG00000091490;ENSG00000095585;ENSG00000103365;ENSG00000114446;ENSG00000116191;ENSG00000120278;ENSG00000133789;ENSG00000137265;ENSG00000139174;ENSG00000144218;ENSG00000144645;ENSG00000148429;ENSG00000152689;ENSG00000152894;ENSG00000153064;ENSG00000163534;ENSG00000164330;ENSG00000164649;ENSG00000165209;ENSG00000170456;ENSG00000177425;ENSG00000184226…	SLC9A7;COL4A4;COBLL1;SEL1L3;BLNK;GGA2;IFT57;RALGPS2;PLEKHG1;SWAP70;IRF4;PRICKLE1;AFF3;OSBPL10;USP6NL;RASGRP3;PTPRK;BANK1;FCRL1;EBF1;CDCA7L;STRBP;DENND5B;PAWR;PCDH9;BEND4;PAX5;ZNF860;RP11-693J15.5;IGKJ4;IGKJ3;MIR600HG;PEG10;MIR4496	0.00459482	1.47427	0.0365324	0.075313	0.321367	0.453849	0.723997	miR-124-3p/miR-181d-5p	ENSG00000103365,ENSG00000133789,ENSG00000164649/ENSG00000133789	0.785/1.684	0.138/0.161	0.887541809568996/0.887541809568996	0.203776	0.0370675	0.16583	0.0909061	0.0359882	0.715505	0.38394	0.14247	0.32881	0.28714	0.12996	0	0	0	1	1	hsa04662 (B cell receptor signaling pathway)	P00012 (Cadherin signaling pathway)	R-HSA-983705 (Signaling by the B Cell Receptor (BCR))	WP3995 (Prion disease pathway)	GO:0042113 (B cell activation)
F:ME102	antiquewhite1	25	ENSG00000044115;ENSG00000049245;ENSG00000049860;ENSG00000079739;ENSG00000084234;ENSG00000090487;ENSG00000100811;ENSG00000104763;ENSG00000108100;ENSG00000110880;ENSG00000112078;ENSG00000119318;ENSG00000119321;ENSG00000134516;ENSG00000135506;ENSG00000136868;ENSG00000137509;ENSG00000137815;ENSG00000147010;ENSG00000160746;ENSG00000163131;ENSG00000169896;ENSG00000187446;ENSG00000197006;ENSG00000266412	CTNNA1;VAMP3;HEXB;PGM1;APLP2;SPG21;YY1;ASAH1;CCNY;CORO1C;KCTD20;RAD23B;FKBP15;DOCK2;OS9;SLC31A1;PRCP;RTF1;SH3KBP1;ANO10;CTSS;ITGAM;CHP1;METTL9;NCOA4	0	1.1452	0.309713	0.415015	-0.333008	0.142801	0.375203	miR-23a-5p/miR-320b/miR-92a-3p/miR-124-3p	ENSG00000119318/ENSG00000119318/ENSG00000119318/ENSG00000119318	3.937/1.797/1.218/-0.006	0.018/0.145/0.245/0.621	0.200981066993971/0.7999507505738/0.898630518845679/1	0.158803	0.105652	0.159166	0.104846	0.0758792	0.441695	0.68128	0.74139	0.12934	0.25305	0.24588	0	0	1	0	2	hsa04142 (Lysosome)	P04375 (5HT3 type receptor mediated signaling pathway)	R-HSA-6798695 (Neutrophil degranulation)	WP3945 (TYROBP Causal Network)	GO:0002446 (neutrophil mediated immunity)
F:ME104	lightblue3	21	ENSG00000013563;ENSG00000075618;ENSG00000090674;ENSG00000101986;ENSG00000107521;ENSG00000109066;ENSG00000110274;ENSG00000116260;ENSG00000129250;ENSG00000130309;ENSG00000130560;ENSG00000130881;ENSG00000144589;ENSG00000160209;ENSG00000165458;ENSG00000167566;ENSG00000175866;ENSG00000182446;ENSG00000186111;ENSG00000214022;ENSG00000226137	DNASE1L1;FSCN1;MCOLN1;ABCD1;HPS1;TMEM104;CEP164;QSOX1;KIF1C;COLGALT1;UBAC1;LRP3;STK11IP;PDXK;INPPL1;NCKAP5L;BAIAP2;NPLOC4;PIP5K1C;REPIN1;BAIAP2-AS1	0	0.795873	0.735303	0.864304	-0.354443	0.0523256	0.210124	NA	NA	NA	NA	NA	0.0841039	0.393657	0.0633211	0.521052	0.0888478	0.367426	0.38695	0.083698	0.21139	0.89656	0.60077	0	0	0	0	0	hsa00562 (Inositol phosphate metabolism)	P00033 (Insulin/IGF pathway-protein kinase B signaling cascade)	R-HSA-1660499 (Synthesis of PIPs at the plasma membrane)	WP51 (Regulation of Actin Cytoskeleton)	GO:0030258 (lipid modification)
F:ME106	darkseagreen4	56	ENSG00000006062;ENSG00000011132;ENSG00000033100;ENSG00000038532;ENSG00000039650;ENSG00000054967;ENSG00000068971;ENSG00000077454;ENSG00000079313;ENSG00000079805;ENSG00000087152;ENSG00000100991;ENSG00000105221;ENSG00000105325;ENSG00000108509;ENSG00000110697;ENSG00000112658;ENSG00000116786;ENSG00000124067;ENSG00000130733;ENSG00000131188;ENSG00000135637;ENSG00000140854;ENSG00000141503;ENSG00000141582…	MAP3K14;APBA3;CHPF2;CLEC16A;PNKP;RELT;PPP2R5B;LRCH4;REXO1;DNM2;ATXN7L3;TRPC4AP;AKT2;FZR1;CAMTA2;PITPNM1;SRF;PLEKHM2;SLC12A4;YIPF2;PRR7;CCDC142;KATNB1;MINK1;CBX4;PI4KB;TEX261;C7orf26;MED22;TAOK2;SHC1;RAVER1;JMJD8;PAQR4;RNF123;MIDN;NFKBID;TAS1R3;RELA;RPS6KB2;DALRD3;ARHGAP45;ALG12;LINC01547;TANGO2;HGS;NDOR1;RAB40C;LDB1;SIPA1;ATF6B;ZSWIM8;ZNF865;RP4-591C20.9;CTD-2231E14.8;NUDT18	0	1.38755	0.0696531	0.129632	-0.318453	0.0987798	0.292268	miR-320b/miR-92a-3p/miR-124-3p	ENSG00000214655/ENSG00000146576/ENSG00000135637,ENSG00000164068	0.991/0.412/-0.119	0.297/0.468/0.634	1/1/1	0.164554	0.0934554	0.142059	0.148293	0.053788	0.585781	0.30661	0.56416	0.77873	0.93111	0.64365	27	2	0	3	0	hsa04211 (Longevity regulating pathway)	P00006 (Apoptosis signaling pathway)	R-HSA-388841 (Costimulation by the CD28 family)	WP481 (Insulin Signaling)	GO:0042303 (molting cycle)
F:ME107	indianred4	49	ENSG00000014216;ENSG00000053918;ENSG00000065000;ENSG00000070047;ENSG00000072958;ENSG00000087274;ENSG00000099995;ENSG00000100304;ENSG00000100345;ENSG00000103549;ENSG00000104853;ENSG00000105063;ENSG00000105556;ENSG00000106948;ENSG00000110497;ENSG00000114853;ENSG00000115677;ENSG00000118960;ENSG00000119574;ENSG00000121671;ENSG00000125741;ENSG00000125844;ENSG00000126461;ENSG00000127666;ENSG00000130402…	CAPN1;KCNQ1;AP3D1;PHRF1;AP1M1;ADD1;SF3A1;TTLL12;MYH9;RNF40;CLPTM1;PPP6R1;MIER2;AKNA;AMBRA1;ZBTB47;HDLBP;HS1BP3;ZBTB45;CRY2;OPA3;RRBP1;SCAF1;TICAM1;ACTN4;ZC3H4;TRAF7;TLN1;NFIC;CCDC97;AKT1;CERS2;MSN;ZC3H18;GPSM1;NACC1;PLD4;STIM1;CHST14;RAB1B;ZBTB7A;TIGD5;SUPT5H;AP2A1;ATG9A;DCTN1;CEBPA;LENG9;CTD-2561B21.8	0	NA	NA	NA	-0.304818	0.289906	0.571286	miR-23a-5p/miR-92a-3p/miR-124-3p	ENSG00000178951/ENSG00000178951/ENSG00000178951	3.265/0.545/-0.679	0.035/0.417/0.845	0.382904937056441/1/1	0.0710612	0.471306	0.0625299	0.526282	0.0704706	0.475009	0.59567	0.66931	0.93275	0.16285	0.32694	0	0	0	1	3	hsa04611 (Platelet activation)	P00029 (Huntington disease)	R-HSA-381038 (XBP1(S) activates chaperone genes)	WP2572 (Primary Focal Segmental Glomerulosclerosis FSGS)	GO:0009896 (positive regulation of catabolic process)
F:ME110	chocolate4	25	ENSG00000023171;ENSG00000025708;ENSG00000092098;ENSG00000100226;ENSG00000100897;ENSG00000105402;ENSG00000110057;ENSG00000118162;ENSG00000129667;ENSG00000130589;ENSG00000135148;ENSG00000160190;ENSG00000168394;ENSG00000168961;ENSG00000172432;ENSG00000177989;ENSG00000178685;ENSG00000185507;ENSG00000187741;ENSG00000196684;ENSG00000213928;ENSG00000234127;ENSG00000272821;ENSG00000272941;ENSG00000279861	GRAMD1B;TYMP;RNF31;GTPBP1;DCAF11;NAPA;UNC93B1;KPTN;RHBDF2;HELZ2;TRAFD1;SLC37A1;TAP1;LGALS9;GTPBP2;ODF3B;PARP10;IRF7;FANCA;HSH2D;IRF9;TRIM26;CTA-384D8.36;RP11-134L10.1;RP11-43N16.4	0	NA	NA	NA	-0.302351	0.716442	0.872757	NA	NA	NA	NA	NA	0.0371518	0.706719	0.0326754	0.740717	0.015588	0.874593	0.98782	0.26996	0.68427	0.20648	0.73967	0	0	0	0	0	hsa04621 (NOD-like receptor signaling pathway)	NA (NA)	R-HSA-877300 (Interferon gamma signaling)	WP4197 (The human immune response to tuberculosis)	GO:0034341 (response to interferon-gamma)
F:ME111	darkorange	125	ENSG00000002549;ENSG00000010030;ENSG00000013374;ENSG00000020577;ENSG00000055332;ENSG00000059378;ENSG00000067066;ENSG00000068079;ENSG00000068489;ENSG00000068784;ENSG00000078081;ENSG00000079263;ENSG00000079385;ENSG00000087237;ENSG00000088827;ENSG00000089127;ENSG00000092010;ENSG00000100336;ENSG00000100911;ENSG00000102524;ENSG00000104312;ENSG00000106785;ENSG00000107201;ENSG00000108679;ENSG00000108691…	LAP3;ETV7;NUB1;SAMD4A;EIF2AK2;PARP12;SP100;IFI35;PRR11;SRBD1;LAMP3;SP140;CEACAM1;CETP;SIGLEC1;OAS1;PSME1;APOL4;PSME2;TNFSF13B;RIPK2;TRIM14;DDX58;LGALS3BP;CCL2;DHX58;OAS3;OAS2;BTN3A3;TRIM38;FAM46A;IFIH1;STAT1;FBXO6;GBP1;MED28;IFIT3;IFIT2;CD274;TRIM6;ACOT9;TNFAIP6;ZBP1;BTN2A2;MT2A;IFI6;APOBEC3F;BST2;GCH1;TRIM5;TRIM22;XAF1;EPSTI1;CNDP2;RSAD2;CMPK2;OASL;SP110;PHF11;CALCOCO2;RTP4;TOR1B;CMTR1;DDX60;IFI…	0	NA	NA	NA	-0.311518	0.0844106	0.269686	miR-92a-3p/miR-124-3p	ENSG00000112773/ENSG00000112773,ENSG00000188313	-0.391/-0.922	0.753/0.952	1/1	0.025059	0.799693	0.0277659	0.778585	0.0314302	0.750267	0.28883	0.1978	0.9493	0.76911	0.10707	8	0	8	6	33	hsa05164 (Influenza A)	P00036 (Interleukin signaling pathway)	R-HSA-913531 (Interferon Signaling)	WP619 (Type II interferon signaling (IFNG))	GO:0098542 (defense response to other organism)
F:ME113	palevioletred1	28	ENSG00000026103;ENSG00000035681;ENSG00000050130;ENSG00000070190;ENSG00000086065;ENSG00000100938;ENSG00000102897;ENSG00000103642;ENSG00000110852;ENSG00000120280;ENSG00000121858;ENSG00000122643;ENSG00000123609;ENSG00000137752;ENSG00000137757;ENSG00000143753;ENSG00000145365;ENSG00000150337;ENSG00000162645;ENSG00000163568;ENSG00000168404;ENSG00000171155;ENSG00000182782;ENSG00000183621;ENSG00000196954…	FAS;NSMAF;JKAMP;DAPP1;CHMP5;GMPR2;LYRM1;LACTB;CLEC2B;CXorf21;TNFSF10;NT5C3A;NMI;CASP1;CASP5;DEGS1;TIFA;FCGR1A;GBP2;AIM2;MLKL;C1GALT1C1;HCAR2;ZNF438;CASP4;FCGR1B;HCAR3;FCGR1CP	0	-0.755031	0.844279	0.966952	0.455395	0.0136701	0.111838	NA	NA	NA	NA	NA	-0.127702	0.194215	-0.101246	0.304098	-0.110102	0.26352	0.78986	0.29828	0.22023	0.88204	0.52377	2	0	6	3	4	hsa04217 (Necroptosis)	P00006 (Apoptosis signaling pathway)	R-HSA-5213460 (RIPK1-mediated regulated necrosis)	WP254 (Apoptosis)	GO:0034341 (response to interferon-gamma)
F:ME114	slateblue	24	ENSG00000008438;ENSG00000059804;ENSG00000069974;ENSG00000071054;ENSG00000077984;ENSG00000100985;ENSG00000101474;ENSG00000102010;ENSG00000115507;ENSG00000115828;ENSG00000125780;ENSG00000138678;ENSG00000159339;ENSG00000159496;ENSG00000163171;ENSG00000167434;ENSG00000172367;ENSG00000172985;ENSG00000175274;ENSG00000180316;ENSG00000183688;ENSG00000186205;ENSG00000213373;ENSG00000274173	PGLYRP1;SLC2A3;RAB27A;MAP4K4;CST7;MMP9;APMAP;BMX;OTX1;QPCT;TGM3;GPAT3;PADI4;RGL4;CDC42EP3;CA4;PDZD3;SH3RF3;TP53I11;PNPLA1;FAM101B;MARC1;LINC00671;RP4-568C11.4	0	NA	NA	NA	-0.28328	0.943194	1	NA	NA	NA	NA	NA	-0.00122389	0.990114	-0.0102073	0.91769	-0.108157	0.272099	0.5583	0.91885	0.22086	0.62745	0.064279	0	0	0	0	0	hsa04964 (Proximal tubule bicarbonate reclamation)	P00004 (Alzheimer disease-presenilin pathway)	R-HSA-6798695 (Neutrophil degranulation)	WP2815 (Mammary gland development pathway - Involution (Stage 4 of 4))	GO:0002446 (neutrophil mediated immunity)
F:ME117	plum2	62	ENSG00000062282;ENSG00000072952;ENSG00000077238;ENSG00000085063;ENSG00000087157;ENSG00000092036;ENSG00000096063;ENSG00000100266;ENSG00000100296;ENSG00000100368;ENSG00000100504;ENSG00000100647;ENSG00000103005;ENSG00000103569;ENSG00000105835;ENSG00000105948;ENSG00000110080;ENSG00000113368;ENSG00000116717;ENSG00000120306;ENSG00000121060;ENSG00000125538;ENSG00000132470;ENSG00000132589;ENSG00000133800…	DGAT2;MRVI1;IL4R;CD59;PGS1;HAUS4;SRPK1;PACSIN2;THOC5;CSF2RB;PYGL;SUSD6;USB1;AQP9;NAMPT;TTC26;ST3GAL4;LMNB1;GADD45A;CYSTM1;TRIM25;IL1B;ITGB4;FLOT2;LYVE1;PHF21A;DYSF;ANXA3;SLC25A37;ADM;ACSL1;ETS2;ALPL;PROK2;DHRS13;PFKFB3;GPR27;LRG1;STAT5B;LRRN1;BASP1;MRVI1-AS1;WDFY3-AS2;LIMK2;MCEMP1;KREMEN1;TLR5;TECPR2;SLC22A4;GK;AC091878.1;NAMPTP1;RP11-196G18.3;AC138035.2;RP11-166N6.2;LINC01093;MIR3945HG;CCDC71L;R…	0	NA	NA	NA	0.38002	0.0100606	0.10969	NA	NA	NA	NA	NA	-0.0522824	0.59633	-0.0511367	0.604415	-0.0829813	0.400023	0.38549	0.5012	0.72415	0.2172	0.85181	0	0	0	0	1	hsa05321 (Inflammatory bowel disease (IBD))	P00036 (Interleukin signaling pathway)	R-HSA-8979227 (Triglyceride metabolism)	WP325 (Triacylglyceride Synthesis)	GO:0006638 (neutral lipid metabolic process)
F:ME118	skyblue	106	ENSG00000007944;ENSG00000017797;ENSG00000025039;ENSG00000033327;ENSG00000035862;ENSG00000051620;ENSG00000057704;ENSG00000058799;ENSG00000065882;ENSG00000075785;ENSG00000087589;ENSG00000092871;ENSG00000100030;ENSG00000100612;ENSG00000101265;ENSG00000101290;ENSG00000101307;ENSG00000101849;ENSG00000102921;ENSG00000102978;ENSG00000104324;ENSG00000105501;ENSG00000105993;ENSG00000107341;ENSG00000109320…	MYLIP;RALBP1;RRAGD;GAB2;TIMP2;HEBP2;TMCC3;YIPF1;TBC1D1;RAB7A;CASS4;RFFL;MAPK1;DHRS7;RASSF2;CDS2;SIRPB1;TBL1X;N4BP1;POLR2C;CPQ;SIGLEC5;DNAJB6;UBE2R2;NFKB1;BST1;HTATIP2;MANSC1;MAK;NEDD9;TREML2;GCA;SIPA1L2;AREL1;CXCL6;LRRC4;SIGLEC9;SEC14L1;ADGRE3;RTN3;MKRN1;NUMB;EGLN1;FAM129A;PLXNC1;KIF13A;WDR20;CD53;FCGR2A;RALB;PNRC1;ZNF185;NRBF2;PTPRJ;LY96;HIST1H2BD;B4GALT5;ADIPOR1;IL6R;SLC25A44;ACOX1;FCGR3B;RNF14…	0	-1.32854	0.0355795	0.0744946	0.312465	0.49772	0.757893	NA	NA	NA	NA	NA	-0.119096	0.226249	-0.103599	0.292936	-0.0993958	0.313064	0.72289	0.9473	0.097796	0.33579	0.55754	6	1	2	12	10	hsa05212 (Pancreatic cancer)	P00036 (Interleukin signaling pathway)	R-HSA-6798695 (Neutrophil degranulation)	WP2112 (IL17 signaling pathway)	GO:0002446 (neutrophil mediated immunity)
F:ME120	darkmagenta	185	ENSG00000005020;ENSG00000005893;ENSG00000012660;ENSG00000014919;ENSG00000021355;ENSG00000025293;ENSG00000027697;ENSG00000029364;ENSG00000036257;ENSG00000057252;ENSG00000058091;ENSG00000064012;ENSG00000065135;ENSG00000065559;ENSG00000065615;ENSG00000067992;ENSG00000068366;ENSG00000069329;ENSG00000073921;ENSG00000076685;ENSG00000077514;ENSG00000080371;ENSG00000081087;ENSG00000081237;ENSG00000082074…	SKAP2;LAMP2;ELOVL5;COX15;SERPINB1;PHF20;IFNGR1;SLC39A9;CUL3;SOAT1;CDK14;CASP8;GNAI3;MAP2K4;CYB5R4;PDK3;ACSL4;VPS35;PICALM;NT5C2;POLD3;RAB21;OSTM1;PTPRC;FYB;ME2;RNF13;WDR47;LPCAT2;XRN2;CMTM6;SNAP23;WAC;SH3GLB1;RAB18;PPM1A;STK4;VAPA;TLR8;RP2;STK24;DNAJC3;NBN;STK3;SNX16;GSR;HBP1;MTPN;MEGF9;SHOC2;CBX1;CPD;GOSR1;PRKAR1A;UBE2D3;RNF141;DSE;MAN1A1;SERINC1;HINT3;SOD2;HMGCR;GBE1;MOB1A;ACTR3;CHMP3;PLA2G4A;C…	0	0.887419	0.676688	0.826854	-0.297769	0.117284	0.314321	miR-4516/miR-124-3p	ENSG00000198833/ENSG00000198833	2.811/-2.007	0.056/0.999	0.610772638555396/1	0.0199916	0.839588	0.0171486	0.862156	-0.016477	0.867505	0.67787	0.82751	0.28112	0.67475	0.25705	0	0	0	0	29	hsa04130 (SNARE interactions in vesicular transport)	P00039 (Metabotropic glutamate receptor group III pathway)	R-HSA-168898 (Toll-like Receptor Cascades)	WP4718 (Cholesterol metabolism (includes both Bloch and Kandutsch-Russell pathways))	GO:0016482 (cytosolic transport)
F:ME123	mediumpurple2	50	ENSG00000008086;ENSG00000066084;ENSG00000075420;ENSG00000082701;ENSG00000084676;ENSG00000089902;ENSG00000109756;ENSG00000110395;ENSG00000110713;ENSG00000118263;ENSG00000118689;ENSG00000121957;ENSG00000124788;ENSG00000124789;ENSG00000126003;ENSG00000133812;ENSG00000135870;ENSG00000137478;ENSG00000137642;ENSG00000139436;ENSG00000140199;ENSG00000141298;ENSG00000150403;ENSG00000153094;ENSG00000153317…	CDKL5;DIP2B;FNDC3B;GSK3B;NCOA1;RCOR1;RAPGEF2;CBL;NUP98;KLF7;FOXO3;GPSM2;ATXN1;NUP153;PLAGL2;SBF2;RC3H1;FCHSD2;SORL1;GIT2;SLC12A6;SSH2;TMCO3;BCL2L11;ASAP1;CDK19;FAM126B;GNAQ;RNF111;WDFY3;RBPJ;TET2;USP32;KIAA0232;JMJD1C;SULT1B1;CAMK1D;RALGAPA2;IL1RAP;IGF2R;FAM212B;F5;CR1;RP11-288H12.3;TMEM185B;RP11-206L10.2;RP4-673D20.3;LINC01094;FAM157C;RP11-21K12.2	0	NA	NA	NA	-0.316071	0.0565056	0.212359	miR-320b/miR-124-3p	ENSG00000126003/ENSG00000126003	1.104/-0.699	0.265/0.851	1/1	0.00911806	0.926447	-0.0152452	0.877329	-0.0285961	0.772142	0.25219	0.16804	0.88564	0.15784	0.66909	0	2	0	0	2	hsa01521 (EGFR tyrosine kinase inhibitor resistance)	P00033 (Insulin/IGF pathway-protein kinase B signaling cascade)	R-HSA-3371453 (Regulation of HSF1-mediated heat shock response)	WP1541 (Energy Metabolism)	GO:0016358 (dendrite development)
F:ME124	honeydew1	58	ENSG00000005339;ENSG00000025800;ENSG00000054965;ENSG00000065526;ENSG00000065970;ENSG00000068650;ENSG00000074755;ENSG00000076108;ENSG00000084112;ENSG00000100207;ENSG00000100393;ENSG00000100731;ENSG00000101191;ENSG00000102710;ENSG00000108175;ENSG00000110400;ENSG00000117713;ENSG00000119408;ENSG00000124422;ENSG00000124496;ENSG00000124782;ENSG00000125386;ENSG00000131626;ENSG00000134250;ENSG00000135686…	CREBBP;KPNA6;FAM168A;SPEN;FOXJ2;ATP11A;ZZEF1;BAZ2A;SSH1;TCF20;EP300;PCNX1;DIDO1;SUPT20H;ZMIZ1;NECTIN1;ARID1A;NEK6;USP22;TRERF1;RREB1;FAM193A;PPFIA1;NOTCH2;KLHL36;SETD1B;PDPK1;KSR1;FAM168B;TGOLN2;ELMSAN1;SKI;SIK3;MAML1;LMTK2;ZNF592;TBC1D2B;ANKRD11;KMT2D;SETD5;MECP2;CHD7;PHF8;CHD2;SMCR8;TET3;MTF1;PHF2;SZT2;NCOA6;C6orf89;MLLT11;RP11-295P9.3;RP11-274B21.2;PRKDC;MGAM2;POM121C;NPTN-IT1	0	0.800908	0.764353	0.890637	0.298548	0.777116	0.900568	miR-92a-3p/miR-124-3p	ENSG00000139718/ENSG00000213190	0.377/-0.847	0.474/0.891	1/1	0.0242966	0.805665	-0.014048	0.886896	-0.054433	0.581287	0.099412	0.63945	0.8061	0.81233	0.78937	3	0	46	6	11	hsa04330 (Notch signaling pathway)	P00052 (TGF-beta signaling pathway)	R-HSA-3247509 (Chromatin modifying enzymes)	WP3651 (Pathways Affected in Adenoid Cystic Carcinoma)	GO:0016569 (covalent chromatin modification)
F:ME125	royalblue3	17	ENSG00000067082;ENSG00000075426;ENSG00000099942;ENSG00000114648;ENSG00000115935;ENSG00000120868;ENSG00000130119;ENSG00000140526;ENSG00000156599;ENSG00000156675;ENSG00000158195;ENSG00000169925;ENSG00000171475;ENSG00000175215;ENSG00000178996;ENSG00000204131;ENSG00000266389	KLF6;FOSL2;CRKL;KLHL18;WIPF1;APAF1;GNL3L;ABHD2;ZDHHC5;RAB11FIP1;WASF2;BRD3;WIPF2;CTDSP2;SNX18;NHSL2;CTB-41I6.1	0	1.18713	0.271491	0.375049	-0.322308	0.406694	0.683593	miR-92a-3p/miR-124-3p	ENSG00000067082/ENSG00000067082	1.604/0.38	0.174/0.483	1/1	0.0762614	0.439393	0.0612121	0.535053	0.051478	0.602002	0.5211	0.34923	0.40881	0.72375	0.58032	0	0	3	0	1	hsa05100 (Bacterial invasion of epithelial cells)	P00020 (FAS signaling pathway)	R-HSA-5663213 (RHO GTPases Activate WASPs and WAVEs)	WP384 (Apoptosis Modulation by HSP70)	GO:0030048 (actin filament-based movement)
F:ME2	plum	51	ENSG00000005448;ENSG00000008838;ENSG00000017483;ENSG00000067191;ENSG00000068028;ENSG00000071626;ENSG00000073350;ENSG00000087087;ENSG00000090006;ENSG00000090565;ENSG00000102312;ENSG00000103227;ENSG00000103253;ENSG00000104814;ENSG00000104936;ENSG00000105122;ENSG00000107331;ENSG00000107829;ENSG00000115085;ENSG00000121104;ENSG00000123159;ENSG00000132879;ENSG00000137877;ENSG00000142173;ENSG00000142303…	WDR54;MED24;SLC38A5;CACNB1;RASSF1;DAZAP1;LLGL2;SRRT;LTBP4;RAB11FIP3;PORCN;LMF1;HAGHL;MAP4K1;DMPK;RASAL3;ABCA2;FBXW4;ZAP70;FAM117A;GIPC1;FBXO44;SPTBN5;COL6A2;ADAMTS10;COPS7B;ACSS1;STARD9;ZFYVE28;RALGDS;PGAP3;TMCO4;SCNN1D;SDCCAG3;EVA1C;TMC8;CARNS1;CTSF;AIM1L;PUS1;MAMDC4;MAGED1;sept.1;SLC25A42;TSEN54;SIGIRR;RTP5;UCKL1;CSNK1E;RP11-479G22.8;LINC00869	0	NA	NA	NA	-0.269562	0.998837	1	NA	NA	NA	NA	NA	0.0146185	0.882335	-0.0047556	0.961599	-0.0341382	0.729549	0.13685	0.74618	0.64875	0.5121	0.15143	0	0	0	0	0	hsa04392 (Hippo signaling pathway)	P00049 (Parkinson disease)	R-HSA-375165 (NCAM signaling for neurite out-growth)	WP4223 (Ras Signaling)	GO:0000910 (cytokinesis)
F:ME23	salmon2	44	ENSG00000003509;ENSG00000016864;ENSG00000023041;ENSG00000053900;ENSG00000075336;ENSG00000079134;ENSG00000089335;ENSG00000096746;ENSG00000107672;ENSG00000111361;ENSG00000113593;ENSG00000120699;ENSG00000120948;ENSG00000121073;ENSG00000128694;ENSG00000128699;ENSG00000128951;ENSG00000131876;ENSG00000136450;ENSG00000138134;ENSG00000148187;ENSG00000151092;ENSG00000161547;ENSG00000162086;ENSG00000162600…	NDUFAF7;GLT8D1;ZDHHC6;ANAPC4;TIMM21;THOC1;ZNF302;HNRNPH3;NSMCE4A;EIF2B1;PPWD1;EXOSC8;TARDBP;SLC35B1;OSGEPL1;ORMDL1;DUT;SNRPA1;SRSF1;STAMBPL1;MRRF;NGLY1;SRSF2;ZNF75A;OMA1;C1orf52;HELQ;PSMD6;RFC4;POP5;CSTF3;COA5;SNORD104;SNORA33;LINC-PINT;SNHG15;ZBED5;INTS6-AS1;SNHG3;SNHG1;RP11-658F2.8;SUZ12P1;LINC01578;GGNBP2	0	-1.21229	0.170584	0.259753	0.396371	0.0309084	0.180075	NA	NA	NA	NA	NA	-0.0935999	0.342255	-0.0911684	0.354995	-0.120606	0.220377	0.64611	0.48671	0.48965	0.6702	0.26638	0	0	6	1	3	hsa03040 (Spliceosome)	P02739 (De novo pyrimidine deoxyribonucleotide biosynthesis)	R-HSA-72187 (mRNA 3'-end processing)	WP411 (mRNA Processing)	GO:0008380 (RNA splicing)
F:ME24	deeppink	30	ENSG00000011295;ENSG00000046651;ENSG00000071994;ENSG00000081870;ENSG00000101247;ENSG00000102054;ENSG00000102543;ENSG00000102738;ENSG00000111196;ENSG00000125246;ENSG00000126226;ENSG00000130177;ENSG00000134759;ENSG00000135597;ENSG00000136169;ENSG00000137871;ENSG00000148057;ENSG00000152942;ENSG00000154473;ENSG00000159593;ENSG00000167699;ENSG00000169062;ENSG00000185418;ENSG00000187676;ENSG00000203965…	TTC19;OFD1;PDCD2;HSPB11;NDUFAF5;RBBP7;CDADC1;MRPS31;MAGOHB;CLYBL;PCID2;CDC16;ELP2;REPS1;SETDB2;ZNF280D;IDNK;RAD17;BUB3;NAE1;GLOD4;UPF3A;TARSL2;B3GLCT;EFCAB7;HMGN1;SBDSP1;LINC00426;CEP95;SRSF8	0	0.931588	0.570971	0.721794	0.327968	0.51608	0.768386	NA	NA	NA	NA	NA	0.0875742	0.374361	0.0740932	0.452548	-0.00784018	0.936732	0.80886	0.37539	0.12206	0.19989	0.82902	0	0	0	0	0	hsa03015 (mRNA surveillance pathway)	NA (NA)	R-HSA-141405 (Inhibition of the proteolytic activity of APC/C required for the onset of anaphase by mitotic spindle checkpoint components)	WP4536 (Genes related to primary cilium development (based on CRISPR))	GO:1901987 (regulation of cell cycle phase transition)
F:ME25	honeydew	40	ENSG00000025156;ENSG00000055044;ENSG00000064102;ENSG00000080608;ENSG00000083535;ENSG00000085760;ENSG00000100749;ENSG00000105819;ENSG00000105821;ENSG00000109445;ENSG00000120963;ENSG00000122566;ENSG00000124596;ENSG00000125351;ENSG00000130826;ENSG00000131269;ENSG00000134453;ENSG00000134480;ENSG00000134697;ENSG00000135317;ENSG00000135336;ENSG00000136936;ENSG00000138668;ENSG00000142856;ENSG00000144029…	HSF2;NOP58;ASUN;PUM3;PIBF1;MTIF2;VRK1;PMPCB;DNAJC2;ZNF330;ZNF706;HNRNPA2B1;OARD1;UPF3B;DKC1;ABCB7;RBM17;CCNH;GNL2;SNX14;ORC3;XPA;HNRNPD;ITGB3BP;MRPS5;RARS2;RBMX;DRAM2;GNL3;AIMP1;BRD7;MFF;HNRNPA3;ADPRM;NUDCD2;CHCHD7;LARP7;PTPN2;PPIL3;TAF15	0	1.00825	0.460624	0.593496	0.344625	0.324527	0.607062	miR-550a-3p/miR-320b/miR-92a-3p/miR-124-3p	ENSG00000122566/ENSG00000122566/ENSG00000122566/ENSG00000122566	2.146/1.327/0.748/-0.476	0.105/0.222/0.362/0.788	1/1/1/1	0.0838044	0.395349	0.0898763	0.361884	-0.00147178	0.988111	0.79453	0.87476	0.8325	0.81389	0.31816	1	0	3	1	0	hsa03008 (Ribosome biogenesis in eukaryotes)	NA (NA)	R-HSA-72163 (mRNA Splicing - Major Pathway)	WP411 (mRNA Processing)	GO:0006397 (mRNA processing)
F:ME26	indianred3	31	ENSG00000006530;ENSG00000008277;ENSG00000026652;ENSG00000065802;ENSG00000070882;ENSG00000083720;ENSG00000097046;ENSG00000110583;ENSG00000111785;ENSG00000131089;ENSG00000134324;ENSG00000139537;ENSG00000141469;ENSG00000146433;ENSG00000147576;ENSG00000153898;ENSG00000154760;ENSG00000159267;ENSG00000164038;ENSG00000167984;ENSG00000172888;ENSG00000173200;ENSG00000175066;ENSG00000186104;ENSG00000205045…	AGK;ADAM22;AGPAT4;ASB1;OSBPL3;OXCT1;CDC7;NAA40;RIC8B;ARHGEF9;LPIN1;CCDC65;SLC14A1;TMEM181;ADHFE1;MCOLN2;SLFN13;HLCS;SLC9B2;NLRC3;ZNF621;PARP15;GK5;CYP2R1;SLFN12L;MIAT;AC104820.2;LINC01278;LINC00987;KLRA1P;ENSG00000284773	0	NA	NA	NA	-0.306181	0.485437	0.747684	NA	NA	NA	NA	NA	0.0458106	0.642617	0.00835582	0.932581	-0.0834128	0.397569	0.65109	0.48119	0.40085	0.56986	0.82568	1	0	0	0	0	hsa00561 (Glycerolipid metabolism)	NA (NA)	R-HSA-1483206 (Glycerophospholipid biosynthesis)	WP702 (Metapathway biotransformation Phase I and II)	GO:0044282 (small molecule catabolic process)
F:ME28	yellowgreen	81	ENSG00000059588;ENSG00000060339;ENSG00000070061;ENSG00000073605;ENSG00000076043;ENSG00000078043;ENSG00000081307;ENSG00000090686;ENSG00000105854;ENSG00000106344;ENSG00000106462;ENSG00000109689;ENSG00000110888;ENSG00000110911;ENSG00000111450;ENSG00000113649;ENSG00000114857;ENSG00000116497;ENSG00000116754;ENSG00000120662;ENSG00000122085;ENSG00000122257;ENSG00000122417;ENSG00000125354;ENSG00000125814…	TARBP1;CCAR1;IKBKAP;GSDMB;REXO2;PIAS2;UBA5;USP48;PON2;RBM28;EZH2;STIM2;CAPRIN2;SLC11A2;STX2;TCERG1;NKTR;S100PBP;SRSF11;MTRF1;MTERF4;RBBP6;ODF2L;sept.6;NAPB;ERMARD;ENOSF1;USPL1;PRPF38B;ODF2;PGBD1;SLTM;ITGA10;TTC13;ZNF514;LUC7L2;SPEF2;ZNF599;ZNF326;ACP6;TRA2A;SUN1;RP11-213G2.3;INTS6L;AGBL2;ZMAT1;ZNF83;HNRNPH1;NAA16;CCDC14;ATAD5;KNTC1;RP11-504P24.3;EP400NL;GSAP;ZNF546;GPR89B;SYCP2;ARMCX4;DZIP3;L3MBT…	0	1.07379	0.353525	0.464435	-0.345597	0.0267592	0.166219	miR-550a-3p/miR-532-3p/miR-181d-5p/miR-92a-3p	ENSG00000169045/ENSG00000169045/ENSG00000169045/ENSG00000169045	1.44/1.239/0.816/0.043	0.201/0.24/0.343/0.598	1/1/1/1	0.098316	0.318377	0.0661876	0.502323	0.0447407	0.650408	0.6154	0.50578	0.8892	0.6127	0.74091	0	0	0	0	1	hsa03040 (Spliceosome)	P05734 (Synaptic vesicle trafficking)	R-HSA-1221632 (Meiotic synapsis)	WP3584 (MECP2 and Associated Rett Syndrome)	GO:0006397 (mRNA processing)
F:ME29	indianred2	21	ENSG00000011007;ENSG00000075856;ENSG00000100335;ENSG00000101126;ENSG00000105879;ENSG00000110048;ENSG00000110917;ENSG00000117036;ENSG00000136451;ENSG00000136485;ENSG00000141034;ENSG00000145041;ENSG00000170027;ENSG00000171115;ENSG00000171940;ENSG00000174013;ENSG00000183864;ENSG00000196417;ENSG00000198093;ENSG00000213799;ENSG00000284024	TCEB3;SART3;MIEF1;ADNP;CBLL1;OSBP;MLEC;ETV3;VEZF1;DCAF7;GID4;DCAF1;YWHAG;GIMAP8;ZNF217;FBXO45;TOB2;ZNF765;ZNF649;ZNF845;ENSG00000284024	0	-1.30107	0.146474	0.230912	0.295482	0.915345	0.997205	NA	NA	NA	NA	NA	-0.137248	0.162668	-0.125732	0.20124	0.0436688	0.658252	0.49892	0.51997	0.09362	0.70613	0.66189	0	0	0	0	0	hsa03018 (RNA degradation)	P00049 (Parkinson disease)	R-HSA-75035 (Chk1/Chk2(Cds1) mediated inactivation of Cyclin B:Cdk1 complex)	WP1425 (Bone Morphogenic Protein (BMP) Signalling and Regulation)	GO:1905475 (regulation of protein localization to membrane)
F:ME3	ivory	74	ENSG00000008300;ENSG00000055483;ENSG00000056558;ENSG00000065029;ENSG00000065357;ENSG00000075826;ENSG00000078699;ENSG00000088448;ENSG00000088808;ENSG00000088899;ENSG00000090924;ENSG00000100346;ENSG00000101224;ENSG00000106479;ENSG00000109685;ENSG00000111674;ENSG00000115687;ENSG00000121310;ENSG00000124181;ENSG00000125459;ENSG00000125731;ENSG00000129351;ENSG00000130827;ENSG00000135127;ENSG00000135749…	CELSR3;USP36;TRAF1;ZNF76;DGKA;SEC31B;CBFA2T2;ANKRD10;PPP1R13B;LZTS3;PLEKHG2;CACNA1I;CDC25B;ZNF862;WHSC1;ENO2;PASK;ECHDC2;PLCG1;MSTO1;SH2D3A;ILF3;PLXNA3;BICDL1;PCNX2;IL11RA;MARCH9;ULK3;ZMYM3;PLCH2;OBSCN;GOLGA7B;RHPN1;CARMIL2;TRIM46;LTBP3;ING5;NLGN2;CHD3;ASXL1;ALS2CL;CTC1;DNHD1;SLC26A11;TSPYL2;POU6F1;WDR27;ZBTB40;UBE2G2;ANO9;MFSD14C;SYNGAP1;ADARB1;STMN3;MDS2;TPM2;GABBR1;RP11-706O15.1;GALT;TNFRSF25;…	0	1.09073	0.328327	0.435602	-0.290999	0.647358	0.86746	NA	NA	NA	NA	NA	0.0630808	0.522638	0.0344596	0.727102	0.0277879	0.778413	0.97549	0.36057	0.17661	0.14455	0.18203	0	0	0	0	0	hsa00562 (Inositol phosphate metabolism)	P02744 (Fructose galactose metabolism)	R-HSA-1855204 (Synthesis of IP3 and IP4 in the cytosol)	WP2018 (RANKL/RANK (Receptor activator of NFKB (ligand)) Signaling Pathway)	GO:0031345 (negative regulation of cell projection organization)
F:ME35	skyblue4	36	ENSG00000005175;ENSG00000008282;ENSG00000009307;ENSG00000066455;ENSG00000070831;ENSG00000073969;ENSG00000079246;ENSG00000089234;ENSG00000091140;ENSG00000091527;ENSG00000100764;ENSG00000101367;ENSG00000104765;ENSG00000106052;ENSG00000108406;ENSG00000114520;ENSG00000115165;ENSG00000115839;ENSG00000119414;ENSG00000120705;ENSG00000122884;ENSG00000131171;ENSG00000134046;ENSG00000134717;ENSG00000135241…	RPAP3;SYPL1;CSDE1;GOLGA5;CDC42;NSF;XRCC5;BRAP;DLD;CDV3;PSMC1;MAPRE1;BNIP3L;TAX1BP1;DHX40;SNX4;CYTIP;RAB3GAP1;PPP6C;ETF1;P4HA1;SH3BGRL;MBD2;BTF3L4;PNPLA8;YME1L1;TPM3;GBAS;YWHAZ;CDC40;UGP2;TMEM167A;C3orf38;MORF4L1;TRIQK;MORF4L1P1	0	1.07663	0.373306	0.48566	-0.298025	0.68023	0.868103	NA	NA	NA	NA	NA	0.129379	0.188374	0.138623	0.158458	0.0418984	0.671291	0.39142	0.1055	0.976	0.7592	0.89995	0	0	0	0	0	hsa05130 (Pathogenic Escherichia coli infection)	P05734 (Synaptic vesicle trafficking)	R-HSA-6811438 (Intra-Golgi traffic)	WP2038 (Regulation of Microtubule Cytoskeleton)	GO:0051656 (establishment of organelle localization)
F:ME37	salmon4	59	ENSG00000009844;ENSG00000010270;ENSG00000028839;ENSG00000038274;ENSG00000055211;ENSG00000057608;ENSG00000062194;ENSG00000079332;ENSG00000083937;ENSG00000091164;ENSG00000100603;ENSG00000100744;ENSG00000102172;ENSG00000103769;ENSG00000104412;ENSG00000111229;ENSG00000112335;ENSG00000113312;ENSG00000113575;ENSG00000114209;ENSG00000116030;ENSG00000116918;ENSG00000117614;ENSG00000117697;ENSG00000117758…	VTA1;STARD3NL;TBPL1;MAT2B;GINM1;GDI2;GPBP1;SAR1A;CHMP2B;TXNL1;SNW1;GSKIP;SMS;RAB11A;EMC2;ARPC3;SNX3;TTC1;PPP2CA;PDCD10;SUMO1;TSNAX;SYF2;NSL1;STX12;PCMT1;SMU1;EAPP;ITFG1;ATP6V1G1;GPR65;TIPRL;CALM2;CETN2;CWC15;VBP1;THOC7;HMGB2;UBLCP1;PEX2;MICU2;PRDX3;GHITM;R3HCC1L;YWHAB;MMADHC;ARF4;CNBP;BPGM;AP3S1;ATP6AP2;SEP15;GTF2F2;C1D;TAF13;HMGN2;SELT;SNX2;PPP2R2A	0	-1.4588	0.0247242	0.0581236	0.318779	0.544965	0.802476	miR-4286/miR-92a-3p/miR-124-3p	ENSG00000079332/ENSG00000062194/ENSG00000079332	2.163/0.36/-0.864	0.103/0.485/0.899	1/1/1	-0.123987	0.207617	-0.0750242	0.446872	-0.138093	0.160069	0.78904	0.44374	0.83249	0.75063	0.94895	0	0	0	0	0	hsa04144 (Endocytosis)	P00023 (General transcription regulation)	R-HSA-2995383 (Initiation of Nuclear Envelope Reformation)	WP500 (Glycogen Synthesis and Degradation)	GO:0016050 (vesicle organization)
F:ME39	tan3	17	ENSG00000086189;ENSG00000091009;ENSG00000104660;ENSG00000105708;ENSG00000140006;ENSG00000144034;ENSG00000151135;ENSG00000153130;ENSG00000158987;ENSG00000164284;ENSG00000164466;ENSG00000165169;ENSG00000181896;ENSG00000185305;ENSG00000186132;ENSG00000198168;ENSG00000255529	DIMT1;RBM27;LEPROTL1;ZNF14;WDR89;TPRKB;TMEM263;SCOC;RAPGEF6;GRPEL2;SFXN1;DYNLT3;ZNF101;ARL15;C2orf76;SVIP;POLR2M	0	-1.34459	0.117386	0.19911	-0.301808	0.742056	0.880588	miR-124-3p	ENSG00000185305	0.38	0.483	1	-0.127906	0.193496	-0.113683	0.24821	-0.0677651	0.492168	0.39335	0.53965	0.68286	0.094256	0.9271	0	0	0	0	0	hsa04530 (Tight junction)	NA (NA)	R-HSA-6782315 (tRNA modification in the nucleus and cytosol)	WP4532 (Intraflagellar transport proteins binding to dynein)	GO:1903828 (negative regulation of cellular protein localization)
F:ME4	lightyellow	152	ENSG00000005206;ENSG00000006025;ENSG00000009830;ENSG00000010310;ENSG00000011275;ENSG00000011478;ENSG00000028310;ENSG00000037042;ENSG00000058453;ENSG00000064201;ENSG00000066117;ENSG00000071564;ENSG00000071894;ENSG00000072071;ENSG00000072195;ENSG00000074582;ENSG00000074855;ENSG00000077044;ENSG00000085998;ENSG00000094631;ENSG00000099904;ENSG00000100197;ENSG00000101194;ENSG00000103168;ENSG00000103222…	SPPL2B;OSBPL7;POMT2;GIPR;RNF216;QPCTL;BRD9;TUBG2;CROCC;TSPAN32;SMARCD1;TCF3;CPSF1;ADGRL1;SPEG;BCS1L;ANO8;DGKD;POMGNT1;HDAC6;ZDHHC8;CYP2D6;SLC17A9;TAF1C;ABCC1;RPAP1;TRMT1;AKAP8;MEGF8;STX1A;NPDC1;KAT2A;TRIM3;C11orf21;ITFG2;HMGXB3;PLXNA1;PCSK4;ABCD4;PYROXD2;SORBS3;ZMIZ2;IDUA;FGFRL1;CHTF18;DGCR8;IVD;GTPBP3;PNPLA7;LAMA5;HIP1R;GSE1;ACAP3;C1orf159;MYBBP1A;PCED1A;FKBP11;DDB2;VILL;TMEM8B;ATAT1;SLC37A4;IFT…	0	1.09389	0.300725	0.407042	-0.329677	0.00297619	0.0954416	miR-92a-3p/miR-124-3p	ENSG00000141956/ENSG00000165138	-0.587/-1.811	0.82/0.997	1/1	0.0805798	0.413847	0.0404728	0.68186	0.0272407	0.782668	0.63724	0.3576	0.78519	0.4416	0.74415	0	0	0	0	0	hsa00515 (Mannose type O-glycan biosynthesis)	P00003 (Alzheimer disease-amyloid secretase pathway)	R-HSA-196741 (Cobalamin (Cbl, vitamin B12) transport and metabolism)	WP4656 (Joubert Syndrome)	GO:0051180 (vitamin transport)
F:ME41	grey60	158	ENSG00000004455;ENSG00000006695;ENSG00000011260;ENSG00000020426;ENSG00000038002;ENSG00000048544;ENSG00000063046;ENSG00000067334;ENSG00000070081;ENSG00000070770;ENSG00000075089;ENSG00000075188;ENSG00000082146;ENSG00000083635;ENSG00000084092;ENSG00000100104;ENSG00000100380;ENSG00000100528;ENSG00000100814;ENSG00000100823;ENSG00000101844;ENSG00000103429;ENSG00000104408;ENSG00000106049;ENSG00000106105…	AK2;COX10;UTP18;MNAT1;AGA;MRPS10;EIF4B;DNTTIP2;NUCB2;CSNK2A2;ACTR6;NUP37;STRADB;NUFIP1;NOA1;SRRD;ST13;CNIH1;CCNB1IP1;APEX1;ATG4A;BFAR;EIF3E;HIBADH;GARS;CHCHD3;LIPA;NUP88;ELP4;METAP2;ELK3;LDHB;SRSF3;MRPS27;THG1L;FXR1;MRPL3;SSR3;PDCL3;UXS1;GORASP2;COX7A2L;FARSB;CACYBP;RPL22;CD48;RPF1;DPH5;PPP1R8;MESDC2;CPSF3;CTNNAL1;SET;FCF1;ACAT2;sept.7;GLO1;DNAJC8;METTL16;DTD2;ATXN10;EIF2S3;IMMT;RPA1;GRSF1;DAP3;T…	0	1.23572	0.125429	0.202499	-0.324256	0.0108803	0.10969	NA	NA	NA	NA	NA	0.138291	0.159467	0.160584	0.101749	0.0890071	0.366565	0.26173	0.91274	0.53092	0.39476	0.33768	2	0	13	2	12	hsa03013 (RNA transport)	P02738 (De novo purine biosynthesis)	R-HSA-72766 (Translation)	WP107 (Translation Factors)	GO:0022613 (ribonucleoprotein complex biogenesis)
F:ME42	lightpink4	59	ENSG00000005059;ENSG00000006451;ENSG00000006634;ENSG00000018699;ENSG00000023734;ENSG00000055130;ENSG00000068912;ENSG00000079785;ENSG00000080824;ENSG00000083544;ENSG00000096384;ENSG00000102241;ENSG00000104131;ENSG00000106443;ENSG00000107625;ENSG00000107937;ENSG00000107949;ENSG00000108578;ENSG00000109971;ENSG00000110958;ENSG00000113013;ENSG00000113643;ENSG00000115053;ENSG00000115233;ENSG00000115484…	MCUB;RALA;DBF4;TTC27;STRAP;CUL1;ERLEC1;DDX1;HSP90AA1;TDRD3;HSP90AB1;HTATSF1;EIF3J;PHF14;DDX50;GTPBP4;BCCIP;BLMH;HSPA8;PTGES3;HSPA9;RARS;NCL;PSMD14;CCT4;NOL10;UCHL5;TCP1;NUDCD1;HSPH1;ARL1;MPHOSPH10;ATG4C;PAICS;EIF2S1;SSB;WDR12;ACP1;EBAG9;C11orf57;CWC27;NIFK;GPATCH4;RBBP4;TYW3;CWC22;METAP1;MIOS;BMS1;NOLC1;CCT2;HSP90B1;STIP1;DDX10;SKA2;HDAC2;ZNF480;TSEN15;PTMAP4	0	0.856304	0.684932	0.826854	0.325992	0.414686	0.683593	NA	NA	NA	NA	NA	0.061432	0.533584	0.0742527	0.451573	0.0498235	0.613741	0.67158	0.74062	0.46992	0.056501	0.27693	2	0	17	1	17	hsa04141 (Protein processing in endoplasmic reticulum)	P00049 (Parkinson disease)	R-HSA-3371568 (Attenuation phase)	WP2359 (Parkin-Ubiquitin Proteasomal System pathway)	GO:0006457 (protein folding)
F:ME5	blueviolet	30	ENSG00000025770;ENSG00000064545;ENSG00000065268;ENSG00000068438;ENSG00000096996;ENSG00000104872;ENSG00000115073;ENSG00000117419;ENSG00000125877;ENSG00000132153;ENSG00000132254;ENSG00000133027;ENSG00000133250;ENSG00000136270;ENSG00000139546;ENSG00000160753;ENSG00000167792;ENSG00000168005;ENSG00000169683;ENSG00000169727;ENSG00000172922;ENSG00000183828;ENSG00000184897;ENSG00000185298;ENSG00000185813…	NCAPH2;TMEM161A;WDR18;FTSJ1;IL12RB1;PIH1D1;ACTR1B;ERI3;ITPA;DHX30;ARFIP2;PEMT;ZNF414;TBRG4;TARBP2;RUSC1;NDUFV1;C11orf84;LRRC45;GPS1;RNASEH2C;NUDT14;H1FX;CCDC137;PCYT2;RNF220;TMEM203;NOXA1;NAT6;TMEM141	0	NA	NA	NA	-0.373	0.0101133	0.10969	NA	NA	NA	NA	NA	0.0152784	0.877064	0.0158041	0.872869	0.0521406	0.597328	0.73227	0.76866	0.56594	0.71284	0.41641	0	0	0	0	0	hsa00564 (Glycerophospholipid metabolism)	P00044 (Nicotinic acetylcholine receptor signaling pathway)	R-HSA-1483206 (Glycerophospholipid biosynthesis)	WP3933 (Kennedy pathway from Sphingolipids)	GO:0034470 (ncRNA processing)
F:ME52	darkolivegreen1	20	ENSG00000066827;ENSG00000090530;ENSG00000099250;ENSG00000100433;ENSG00000102174;ENSG00000105426;ENSG00000111249;ENSG00000124507;ENSG00000132386;ENSG00000142627;ENSG00000146072;ENSG00000163687;ENSG00000167634;ENSG00000198794;ENSG00000229961;ENSG00000239961;ENSG00000242258;ENSG00000248991;ENSG00000259162;ENSG00000284543	ZFAT;P3H2;NRP1;KCNK10;PHEX;PTPRS;CUX2;PACSIN1;SERPINF1;EPHA2;TNFRSF21;DNASE1L3;NLRP7;SCAMP5;RP11-71G12.1;LILRA4;LINC00996;RP11-73G16.2;RP11-203M5.6;ENSG00000284543	0	1.26232	0.190157	0.28418	0.351579	0.249526	0.513253	NA	NA	NA	NA	NA	0.143107	0.145292	0.103397	0.293885	0.153785	0.11728	0.43821	0.40654	0.55098	0.39271	0.41963	0	0	0	0	6	hsa04360 (Axon guidance)	P00007 (Axon guidance mediated by semaphorins)	R-HSA-388844 (Receptor-type tyrosine-protein phosphatases)	WP1433 (Nucleotide-binding Oligomerization Domain (NOD) pathway)	GO:0001818 (negative regulation of cytokine production)
F:ME53	pink3	23	ENSG00000100292;ENSG00000106341;ENSG00000107954;ENSG00000129757;ENSG00000136193;ENSG00000138166;ENSG00000148737;ENSG00000158186;ENSG00000165731;ENSG00000166165;ENSG00000166927;ENSG00000170873;ENSG00000171954;ENSG00000175544;ENSG00000180155;ENSG00000182853;ENSG00000183779;ENSG00000197353;ENSG00000198682;ENSG00000203747;ENSG00000204634;ENSG00000233392;ENSG00000261655	HMOX1;PPP1R17;NEURL1;CDKN1C;SCRN1;DUSP5;TCF7L2;MRAS;RET;CKB;MS4A7;MTSS1;CYP4F22;CABP4;LYNX1;VMO1;ZNF703;LYPD2;PAPSS2;FCGR3A;TBC1D8;AC104809.4;CTD-3064M3.3	0	-1.53021	0.022351	0.0544551	-0.346498	0.0966892	0.292268	NA	NA	NA	NA	NA	-0.125772	0.201098	-0.138162	0.159861	0.0158207	0.872737	0.22288	0.21128	0.52942	0.91209	0.090866	0	0	0	0	0	hsa05216 (Thyroid cancer)	P00045 (Notch signaling pathway)	R-HSA-211859 (Biological oxidations)	WP3678 (Amplification and Expansion of Oncogenic Pathways as Metastatic Traits)	GO:0050673 (epithelial cell proliferation)
F:ME56	brown1	19	ENSG00000003249;ENSG00000026559;ENSG00000035720;ENSG00000091972;ENSG00000100721;ENSG00000103647;ENSG00000104921;ENSG00000106537;ENSG00000110987;ENSG00000133424;ENSG00000147535;ENSG00000153253;ENSG00000154380;ENSG00000172548;ENSG00000183960;ENSG00000187621;ENSG00000211898;ENSG00000251513;ENSG00000257275	DBNDD1;KCNG1;STAP1;CD200;TCL1A;CORO2B;FCER2;TSPAN13;BCL7A;LARGE1;PLPP5;SCN3A;ENAH;NIPAL4;KCNH8;TCL6;IGHD;CTD-2215E18.1;RP11-164H13.1	0	-0.898301	0.606036	0.758961	0.283925	0.977415	1	NA	NA	NA	NA	NA	-0.0139806	0.887435	-0.0316744	0.748391	-0.0521724	0.597104	0.66642	0.70904	0.34189	0.34601	0.92767	0	0	0	0	0	hsa00515 (Mannose type O-glycan biosynthesis)	NA (NA)	R-HSA-1296072 (Voltage gated Potassium channels)	WP2840 (Hair Follicle Development: Cytodifferentiation (Part 3 of 3))	GO:0034765 (regulation of ion transmembrane transport)
F:ME58	yellow4	52	ENSG00000002587;ENSG00000005471;ENSG00000007312;ENSG00000012124;ENSG00000075275;ENSG00000079931;ENSG00000083454;ENSG00000101017;ENSG00000105369;ENSG00000106624;ENSG00000110777;ENSG00000112232;ENSG00000117322;ENSG00000119866;ENSG00000124225;ENSG00000124772;ENSG00000128218;ENSG00000128438;ENSG00000132185;ENSG00000132704;ENSG00000133740;ENSG00000136573;ENSG00000137101;ENSG00000143297;ENSG00000156738…	HS3ST1;ABCB4;CD79B;CD22;CELSR1;MOXD1;P2RX5;CD40;CD79A;AEBP1;POU2AF1;KHDRBS2;CR2;BCL11A;PMEPA1;CPNE5;VPREB3;TBC1D27;FCRLA;FCRL2;E2F5;BLK;CD72;FCRL5;MS4A1;SNX22;TNFRSF13C;BEND5;FAM129C;PPP1R14A;PNOC;PKIG;COL4A3;PARM1;SYNPO;TLR10;DOK7;CD19;GEN1;NXPH4;KLHL14;IGKJ1;IGHM;EML6;FAM30A;LINC00494;TNFRSF13B;HLA-DOB;LINC00926;IGLL5;MIR5195;SPIB	0	0.831505	0.714049	0.846749	-0.335565	0.0408884	0.19568	NA	NA	NA	NA	NA	0.0381807	0.698983	0.0234548	0.812272	-0.0600007	0.543179	0.66597	0.39029	0.43905	0.37335	0.73775	4	1	2	1	6	hsa04662 (B cell receptor signaling pathway)	P00010 (B cell activation)	R-HSA-983695 (Antigen activates B Cell Receptor (BCR) leading to generation of second messengers)	WP23 (B Cell Receptor Signaling Pathway)	GO:0042113 (B cell activation)
F:ME59	darkolivegreen4	47	ENSG00000001461;ENSG00000021300;ENSG00000081059;ENSG00000089012;ENSG00000100100;ENSG00000101298;ENSG00000101842;ENSG00000102760;ENSG00000107742;ENSG00000112182;ENSG00000116771;ENSG00000117643;ENSG00000126353;ENSG00000135426;ENSG00000135960;ENSG00000136997;ENSG00000138795;ENSG00000139193;ENSG00000140545;ENSG00000140577;ENSG00000140743;ENSG00000142546;ENSG00000144152;ENSG00000146904;ENSG00000147457…	NIPAL3;PLEKHB1;TCF7;SIRPG;PIK3IP1;SNPH;VSIG1;RGCC;SPOCK2;BACH2;AGMAT;MAN1C1;CCR7;TESPA1;EDAR;MYC;LEF1;CD27;MFGE8;CRTC3;CDR2;NOSIP;FBLN7;EPHA1;CHMP7;FAM171A1;BAG3;TSPAN18;LDLRAP1;CACHD1;THEM4;FCMR;AQP3;APBB1;FAM102A;AXIN2;MAL;NET1;GP5;AMIGO1;NOG;NELL2;LBH;LEF1-AS1;CCR12P;MMP28;SGK223	0	-0.814427	0.79122	0.913996	-0.301883	0.418318	0.683593	miR-124-3p	ENSG00000102760	-0.637	0.839	1	0.00746893	0.939723	0.00920138	0.925777	0.0924815	0.348079	0.68951	0.11968	0.10817	0.65528	0.84811	10	0	1	9	3	hsa05213 (Endometrial cancer)	P00011 (Blood coagulation)	R-HSA-201722 (Formation of the beta-catenin:TCF transactivating complex)	WP4155 (Endometrial cancer)	GO:1904837 (beta-catenin-TCF complex assembly)
F:ME6	orange	127	ENSG00000044090;ENSG00000048140;ENSG00000049769;ENSG00000063176;ENSG00000067836;ENSG00000069998;ENSG00000077312;ENSG00000084652;ENSG00000099899;ENSG00000100324;ENSG00000100360;ENSG00000100726;ENSG00000100949;ENSG00000100997;ENSG00000103043;ENSG00000103174;ENSG00000103254;ENSG00000104812;ENSG00000104863;ENSG00000104884;ENSG00000105298;ENSG00000105364;ENSG00000105676;ENSG00000105726;ENSG00000106397…	CUL7;TSPAN17;PPP1R3F;SPHK2;ROGDI;CECR5;SNRPA;TXLNA;TRMT2A;TAB1;IFT27;TELO2;RABGGTA;ABHD12;VAC14;NAGPA;FAM173A;GYS1;LIN7B;ERCC2;CACTIN;MRPL4;ARMC6;ATP13A1;PLOD3;ENG;SFXN3;DNAJC4;ACAD10;USP5;MOGS;STK25;FAAH;WDR34;TMEM214;CEP89;WDR83;WRNIP1;SLC25A35;AP5S1;ASL;TRAP1;CPSF3L;SMARCA4;SDF2L1;THEM6;LRRC47;TUBG1;THOC6;CLUH;DPH2;MACROD1;WDR74;IMP4;FOXP4;CDAN1;ARMC5;SCRN2;PELP1;DUS3L;EVI5L;USP21;SH3GLB2;MIGA…	0	0.95903	0.533223	0.680494	-0.313655	0.0360082	0.185581	miR-124-3p	ENSG00000172269,ENSG00000174915	-0.938	0.957	1	0.0561666	0.56929	0.03948	0.689257	0.0634031	0.520511	0.45807	0.91677	0.28266	0.26597	0.90373	0	0	1	1	0	hsa00510 (N-Glycan biosynthesis)	P00014 (Cholesterol biosynthesis)	R-HSA-3781860 (Diseases associated with N-glycosylation of proteins)	WP4521 (Glycosylation and related congenital defects)	GO:0006490 (oligosaccharide-lipid intermediate biosynthetic process)
F:ME60	magenta4	41	ENSG00000047634;ENSG00000057935;ENSG00000088387;ENSG00000089775;ENSG00000091409;ENSG00000099204;ENSG00000104689;ENSG00000111863;ENSG00000112394;ENSG00000113319;ENSG00000117602;ENSG00000120915;ENSG00000127152;ENSG00000131686;ENSG00000133131;ENSG00000136111;ENSG00000136153;ENSG00000141576;ENSG00000146021;ENSG00000151623;ENSG00000152270;ENSG00000152495;ENSG00000154027;ENSG00000154229;ENSG00000154814…	SCML1;MTA3;DOCK9;ZBTB25;ITGA6;ABLIM1;TNFRSF10A;ADTRP;SLC16A10;RASGRF2;RCAN3;EPHX2;BCL11B;CA6;MORC4;TBC1D4;LMO7;RNF157;KLHL3;NR3C2;PDE3B;CAMK4;AK5;PRKCA;OXNAD1;PLXDC1;MLLT3;PLAG1;SATB1;TRABD2A;TSPYL4;FHIT;GPRASP1;ATP10A;CHRM3-AS2;PRKCQ-AS1;LINC01550;LINC01619;RP11-799D4.4;RP11-415F23.2;RP1-47M23.3	0	1.3848	0.0733865	0.134709	-0.308548	0.202563	0.45239	miR-124-3p/miR-320b/miR-92a-3p	ENSG00000151623,ENSG00000091409,ENSG00000154229/ENSG00000091409/ENSG00000091409	0.598/1.303/0.724	0.194/0.222/0.362	1/1/1	0.185082	0.0587332	0.153063	0.11903	0.157781	0.107944	0.93831	0.099392	0.22833	0.73375	0.69099	0	0	0	0	0	hsa04960 (Aldosterone-regulated sodium reabsorption)	P00006 (Apoptosis signaling pathway)	R-HSA-112314 (Neurotransmitter receptors and postsynaptic signal transmission)	WP2636 (Common Pathways Underlying Drug Addiction)	GO:0042476 (odontogenesis)
F:ME62	maroon	59	ENSG00000005469;ENSG00000010810;ENSG00000027075;ENSG00000050405;ENSG00000050730;ENSG00000052126;ENSG00000059573;ENSG00000065675;ENSG00000072858;ENSG00000075945;ENSG00000076003;ENSG00000076248;ENSG00000078304;ENSG00000082458;ENSG00000085511;ENSG00000092470;ENSG00000101096;ENSG00000102245;ENSG00000107485;ENSG00000109680;ENSG00000112118;ENSG00000112378;ENSG00000113088;ENSG00000114423;ENSG00000116824…	CROT;FYN;PRKCH;LIMA1;TNIP3;PLEKHA5;ALDH18A1;PRKCQ;SIDT1;KIFAP3;MCM6;UNG;PPP2R5C;DLG3;MAP3K4;WDR76;NFATC2;CD40LG;GATA3;TBC1D19;MCM3;PERP;GZMK;CBLB;CD2;MREG;LAX1;OPTN;ZNF831;HS3ST3B1;ANKEF1;RRAS2;ELP3;ZNF365;SKAP1;LYAR;DCP1B;ZNF827;NMT2;CD96;CCR5;IKZF3;SLAMF6;TLR3;TSPAN5;IFFO2;S1PR1;CXCR6;GPR171;TIGIT;CADM1;ZNF197;CMC1;ZNF286A;STK39;CALM1;RP11-73O6.3;TMPRSS4-AS1;OTUD7B	0	NA	NA	NA	-0.312452	0.102512	0.292268	miR-124-3p	ENSG00000075945	-0.864	0.899	1	-0.000190721	0.998459	-0.0114559	0.907663	-0.0962397	0.328753	0.67747	0.13798	0.86685	0.68583	0.5498	6	1	37	3	17	hsa04625 (C-type lectin receptor signaling pathway)	P00018 (EGF receptor signaling pathway)	R-HSA-2514859 (Inactivation, recovery and regulation of the phototransduction cascade)	WP69 (T-Cell antigen Receptor (TCR) Signaling Pathway)	GO:0002250 (adaptive immune response)
F:ME63	purple	248	ENSG00000001561;ENSG00000005379;ENSG00000005844;ENSG00000006555;ENSG00000007264;ENSG00000007402;ENSG00000020633;ENSG00000021762;ENSG00000026751;ENSG00000027869;ENSG00000048028;ENSG00000060140;ENSG00000061676;ENSG00000067141;ENSG00000067840;ENSG00000069702;ENSG00000073861;ENSG00000074590;ENSG00000075234;ENSG00000080493;ENSG00000085563;ENSG00000087258;ENSG00000088179;ENSG00000089692;ENSG00000097021…	ENPP4;TSPOAP1;ITGAL;TTC22;MATK;CACNA2D2;RUNX3;OSBPL5;SLAMF7;SH2D2A;USP28;STYK1;NCKAP1;NEO1;PDZD4;TGFBR3;TBX21;NUAK1;TTC38;SLC4A4;ABCB1;GNAO1;PTPN4;LAG3;ACOT7;ARVCF;YPEL1;XBP1;APOBEC3H;IL2RB;MLC1;GZMH;GZMB;PROCR;SMAD7;IL21R;NCALD;FSD1;LIM2;NKG7;ATP1A3;PTGDS;RGS9;ABI3;B3GAT1;CEP126;IFNG;GNPTAB;KLRB1;ENPP5;PDGFRB;TFDP2;GNLY;ID2;DHCR24;C1orf21;UAP1;RAB29;CD160;FASLG;GPR68;ADGRB2;XPNPEP2;CD244;KIR2DL1…	0	0.885817	0.684454	0.826854	-0.310195	0.0123457	0.110288	miR-5585-3p/miR-1270/miR-4286/miR-181d-5p/miR-320b/miR-92a-3p/miR-124-3p	ENSG00000169252,ENSG00000175505/ENSG00000100385,ENSG00000196169/ENSG00000151208/ENSG00000100385/ENSG00000151208/ENSG00000151208/ENSG00000103522,ENSG00000151208	2.742/1.602/0.727/-0.303/-0.497/-1.076/-1.607	0.006/0.055/0.368/0.724/0.791/0.939/0.999	0.0664264586670922/0.300711903458321/1/1/1/1/1	0.0405455	0.68132	0.0300463	0.760925	-0.062138	0.528883	0.43838	0.45733	0.16524	0.89304	0.72639	4	0	3	1	15	hsa04650 (Natural killer cell mediated cytotoxicity)	P00012 (Cadherin signaling pathway)	R-HSA-198933 (Immunoregulatory interactions between a Lymphoid and a non-Lymphoid cell)	WP3893 (Development and heterogeneity of the ILC family)	GO:0006968 (cellular defense response)
F:ME64	darkred	142	ENSG00000005187;ENSG00000005189;ENSG00000007968;ENSG00000010671;ENSG00000040531;ENSG00000049089;ENSG00000055118;ENSG00000071242;ENSG00000072134;ENSG00000076555;ENSG00000091181;ENSG00000092067;ENSG00000099377;ENSG00000100628;ENSG00000102145;ENSG00000102471;ENSG00000103056;ENSG00000103319;ENSG00000103355;ENSG00000105205;ENSG00000105366;ENSG00000107242;ENSG00000109099;ENSG00000112715;ENSG00000112759…	ACSM3;AC004381.6;E2F2;BTK;CTNS;COL9A2;KCNH2;RPS6KA2;EPN2;ACACB;IL5RA;CEBPE;HSD3B7;ASB2;GATA1;NDFIP2;SMPD3;EEF2K;PRSS33;CLC;SIGLEC8;PIP5K1B;PMP22;VEGFA;SLC29A1;ARSB;THBS4;HES1;EPAS1;MYB;ALDH6A1;CCDC170;MYCT1;CAT;TMIGD3;FAM124B;TOX2;EFNB2;MGAT3;LRRC17;CACNG6;CEP85;IDO1;KHDRBS3;LGALS12;CAMK1;MEIS2;CD101;HRH4;HRK;ACVR1B;TEC;ENPP2;TRPC6;TUBGCP4;CDK15;SEMA7A;SORD;ZSCAN29;CACNG8;SKP2;GFOD1;VLDLR;PLIN2;D…	0	NA	NA	NA	0.318176	0.326183	0.607062	NA	NA	NA	NA	NA	0.0372768	0.705778	0.0152365	0.877399	0.0424439	0.667262	0.48671	0.3224	0.1253	0.85133	0.42115	0	0	6	4	12	hsa04080 (Neuroactive ligand-receptor interaction)	P00003 (Alzheimer disease-amyloid secretase pathway)	R-HSA-373076 (Class A/1 (Rhodopsin-like receptors))	WP455 (GPCRs, Class A Rhodopsin-like)	GO:0007187 (G protein-coupled receptor signaling pathway, coupled to cyclic nucleotide second messenger)
F:ME67	saddlebrown	102	ENSG00000005156;ENSG00000005810;ENSG00000008226;ENSG00000040933;ENSG00000048707;ENSG00000054654;ENSG00000055609;ENSG00000058668;ENSG00000061987;ENSG00000065883;ENSG00000066739;ENSG00000067369;ENSG00000072121;ENSG00000072501;ENSG00000074054;ENSG00000075151;ENSG00000075539;ENSG00000075568;ENSG00000086758;ENSG00000089057;ENSG00000090905;ENSG00000092148;ENSG00000100426;ENSG00000100523;ENSG00000100888…	LIG3;MYCBP2;DLEC1;INPP4A;VPS13D;SYNE2;KMT2C;ATP2B4;MON2;CDK13;ATG2B;TP53BP1;ZFYVE26;SMC1A;CLASP1;EIF4G3;FRYL;TMEM131;HUWE1;SLC23A2;TNRC6A;HECTD1;ZBED4;DDHD1;CHD8;DGKH;HERC1;SPG11;UBR5;ZKSCAN1;CEP85L;MDN1;PIKFYVE;BIRC6;AAK1;PRRC2C;KMT2A;YLPM1;NEK9;UTP20;ZC3H13;ATP8A1;AGO3;UBR4;MACF1;CRACR2A;AFDN;SYNE1;ANKRD17;VPS13B;SRRM1;ZCCHC11;CEP350;CDK5RAP2;MDC1;KIAA1109;ZCCHC14;NCOR1;POGZ;GABPB2;LPP;NOM1;TAF…	0	1.15883	0.229522	0.334304	0.298487	0.779596	0.900568	miR-181d-5p/miR-320b/miR-92a-3p	ENSG00000159140/ENSG00000159140/ENSG00000150995	0.585/0.391/-0.188	0.405/0.467/0.676	1/1/1	0.120203	0.221933	0.0690536	0.483955	0.0716438	0.467669	0.34226	0.62897	0.75152	0.57043	0.89881	1	0	4	8	3	hsa04070 (Phosphatidylinositol signaling system)	P04398 (p53 pathway feedback loops 2)	R-HSA-1500620 (Meiosis)	WP3878 (ATM Signaling Network in Development and Disease)	GO:0051052 (regulation of DNA metabolic process)
F:ME69	antiquewhite2	236	ENSG00000001631;ENSG00000004897;ENSG00000005889;ENSG00000006576;ENSG00000011258;ENSG00000011405;ENSG00000011454;ENSG00000011566;ENSG00000017260;ENSG00000023445;ENSG00000023572;ENSG00000033178;ENSG00000036549;ENSG00000047932;ENSG00000052795;ENSG00000053770;ENSG00000056277;ENSG00000056586;ENSG00000066427;ENSG00000066557;ENSG00000066777;ENSG00000069869;ENSG00000071794;ENSG00000074603;ENSG00000076321…	KRIT1;CDC27;ZFX;PHTF2;MBTD1;PIK3C2A;RABGAP1;MAP4K3;ATP2C1;BIRC3;GLRX2;UBA6;ZZZ3;GOPC;FNIP2;AP5M1;ZNF280C;RC3H2;ATXN3;LRRC40;ARFGEF1;NEDD4;HLTF;DPP8;KLHL20;USP33;TIGAR;RIF1;C5orf22;COL19A1;BCKDHB;REST;MYNN;TXNDC16;GPATCH2;SUCO;SIRT1;FNDC3A;ATP8B4;MTMR9;ZNF175;C1GALT1;GLCCI1;TMEM106B;SPIN1;MAPK8;SEC23IP;TNKS2;ACBD5;RPS6KB1;INTS2;CLCN3;SC5D;FBXO3;PARP11;NAA25;CNOT2;HCFC2;FGFR1OP2;ZBTB24;CNOT6;MSH3;F…	0	1.27881	0.0865198	0.154814	-0.299728	0.0843882	0.269686	miR-320b/miR-92a-3p/miR-124-3p/miR-181d-5p	ENSG00000107854,ENSG00000136051/ENSG00000082293,ENSG00000107854,ENSG00000123552/ENSG00000106392,ENSG00000107854,ENSG00000113851,ENSG00000123552,ENSG00000136051,ENSG00000163607,ENSG00000163755,ENSG00000198677/ENSG00000204130	0.246/0.072/-0.171/-0.253	0.436/0.493/0.679/0.707	1/1/1/1	0.141145	0.150948	0.0937212	0.341627	0.0848062	0.389704	0.097441	0.99453	0.41532	0.34181	0.97889	0	0	0	0	0	hsa04910 (Insulin signaling pathway)	P04397 (p53 pathway by glucose deprivation)	R-HSA-5693532 (DNA Double-Strand Break Repair)	WP481 (Insulin Signaling)	GO:0006302 (double-strand break repair)
F:ME77	lavenderblush2	40	ENSG00000059758;ENSG00000066422;ENSG00000081019;ENSG00000083312;ENSG00000100934;ENSG00000106299;ENSG00000108588;ENSG00000114796;ENSG00000115421;ENSG00000116095;ENSG00000119446;ENSG00000128989;ENSG00000134371;ENSG00000135387;ENSG00000136940;ENSG00000139505;ENSG00000139517;ENSG00000143756;ENSG00000145817;ENSG00000151292;ENSG00000152944;ENSG00000154642;ENSG00000156735;ENSG00000162928;ENSG00000165417…	CDK17;ZBTB11;RSBN1;TNPO1;SEC23A;WASL;CCDC47;KLHL24;PAPOLG;PLEKHA3;RBM18;ARPP19;CDC73;CAPRIN1;PDCL;MTMR6;LNX2;FBXO28;YIPF5;CSNK1G3;MED21;C21orf91;BAG4;PEX13;GTF2A1;CPSF2;FRS2;TMEM170A;SLC30A1;FOXN2;MSANTD4;ZNF24;LYSMD3;ELMOD2;KLHL28;RBM43;VKORC1L1;STRN3;PARG;PPP4R3B	0	-0.886864	0.657226	0.815447	-0.328672	0.169118	0.412032	miR-124-3p	ENSG00000114796	-0.476	0.788	1	0.0206974	0.834004	-0.00594394	0.952013	-0.0187922	0.849094	0.27901	0.82025	0.39106	0.78941	0.63914	0	0	0	0	0	hsa03015 (mRNA surveillance pathway)	P00023 (General transcription regulation)	R-HSA-5655302 (Signaling by FGFR1 in disease)	WP3529 (Zinc homeostasis)	GO:0043631 (RNA polyadenylation)
F:ME84	mediumpurple1	33	ENSG00000015133;ENSG00000068654;ENSG00000084774;ENSG00000089154;ENSG00000090863;ENSG00000095319;ENSG00000096433;ENSG00000107862;ENSG00000109111;ENSG00000111676;ENSG00000115568;ENSG00000120685;ENSG00000130816;ENSG00000132182;ENSG00000133030;ENSG00000133065;ENSG00000137073;ENSG00000142207;ENSG00000143126;ENSG00000143569;ENSG00000148396;ENSG00000148843;ENSG00000160299;ENSG00000160803;ENSG00000166949…	CCDC88C;POLR1A;CAD;GCN1;GLG1;NUP188;ITPR3;GBF1;SUPT6H;ATN1;ZNF142;PROSER1;DNMT1;NUP210;MPRIP;SLC41A1;UBAP2;URB1;CELSR2;UBAP2L;SEC16A;PDCD11;PCNT;UBQLN4;SMAD3;ABCA3;FASN;PRPF8;UBE2O;HTT;SPTAN1;IPO9;ACACA	0	1.17853	0.255894	0.360946	-0.359295	0.0039019	0.0954416	miR-92a-3p/miR-124-3p	ENSG00000130816,ENSG00000096433/ENSG00000096433,ENSG00000130816,ENSG00000133030	1.634/0.815	0.052/0.129	0.57529672906119/0.709402570038777	0.123698	0.208685	0.0841138	0.393601	0.117533	0.232445	0.13409	0.63701	0.49422	0.23855	0.28758	0	0	0	0	0	hsa00061 (Fatty acid biosynthesis)	P00057 (Wnt signaling pathway)	R-HSA-163685 (Integration of energy metabolism)	WP357 (Fatty Acid Biosynthesis)	GO:0051169 (nuclear transport)
F:ME96	coral2	147	ENSG00000002822;ENSG00000004142;ENSG00000004399;ENSG00000007080;ENSG00000007520;ENSG00000010256;ENSG00000013306;ENSG00000023191;ENSG00000042493;ENSG00000042753;ENSG00000049656;ENSG00000053371;ENSG00000063241;ENSG00000066044;ENSG00000068903;ENSG00000074842;ENSG00000081692;ENSG00000084207;ENSG00000087111;ENSG00000090273;ENSG00000090861;ENSG00000093010;ENSG00000099341;ENSG00000099385;ENSG00000099797…	MAD1L1;POLDIP2;PLXND1;CCDC124;TSR3;UQCRC1;SLC25A39;RNH1;CAPG;AP2S1;CLPTM1L;AKR7A2;ISOC2;ELAVL1;SIRT2;MYDGF;JMJD4;GSTP1;PIGS;NUDC;AARS;COMT;PSMD8;BCL7C;TECR;SMARCB1;PES1;MFNG;SLC25A1;CST3;AHCY;MAGED2;NPRL3;STUB1;R3HCC1;SNAPC2;IL27RA;ILVBL;GPI;PLD3;KDELR1;GRWD1;DBP;BCAT2;PPP2R1A;EIF3B;NRF1;BCL7B;YKT6;LHPP;SYNGR2;DCPS;PRPF19;ATP5B;TPI1;GMDS;SRM;PTPA;SIL1;UBIAD1;MRPS2;ACADS;PEPD;MIF4GD;CENPB;CAPNS1;P…	0	NA	NA	NA	0.306353	0.609962	0.851405	miR-124-3p	ENSG00000126457	-1.777	0.997	1	0.0409244	0.678505	0.0556381	0.572936	0.0641312	0.515723	0.90204	0.74541	0.65123	0.15392	0.57853	0	0	2	0	0	hsa00270 (Cysteine and methionine metabolism)	P00024 (Glycolysis)	R-HSA-70263 (Gluconeogenesis)	WP4290 (Metabolic reprogramming in colon cancer)	GO:0042180 (cellular ketone metabolic process)
F:ME97	violet	94	ENSG00000007376;ENSG00000078808;ENSG00000079999;ENSG00000086015;ENSG00000088247;ENSG00000089486;ENSG00000090097;ENSG00000095906;ENSG00000099364;ENSG00000099821;ENSG00000100241;ENSG00000100243;ENSG00000100297;ENSG00000100379;ENSG00000101997;ENSG00000103126;ENSG00000103152;ENSG00000103199;ENSG00000103495;ENSG00000104964;ENSG00000104980;ENSG00000106351;ENSG00000107021;ENSG00000107140;ENSG00000108106…	RPUSD1;SDF4;KEAP1;MAST2;KHSRP;CDIP1;PCBP4;NUBP2;FBXL19;POLRMT;SBF1;CYB5R3;MCM5;KCTD17;CCDC22;AXIN1;MPG;ZNF500;MAZ;AES;TIMM44;AGFG2;TBC1D13;TESK1;UBE2S;GIT1;PSMD3;CD81;SCAMP3;SLC2A1;STK11;DDX54;PKN1;ATG101;MXD4;CHPF;DNPEP;SLC2A4RG;SLC10A3;DDA1;JUND;TMEM160;LLGL1;BTBD2;MEN1;HS6ST1;LRRC8A;BAHD1;SCAMP2;SLC39A3;PFKL;RNPEPL1;MEPCE;DHX37;SLC38A10;PEX10;FBXW5;ATP13A2;PSKH1;C19orf47;TOR2A;FAM189B;MFSD12;S…	0	1.22326	0.166999	0.257216	-0.287193	0.729975	0.880588	miR-124-3p	ENSG00000108344,ENSG00000184207	-0.637	0.877	1	0.115127	0.242215	0.107079	0.276934	0.0777861	0.430273	0.8156	0.66637	0.5648	0.51811	0.31257	0	0	0	0	0	hsa04211 (Longevity regulating pathway)	P00024 (Glycolysis)	R-HSA-5619102 (SLC transporter disorders)	WP4577 (Neurodegeneration with brain iron accumulation (NBIA) subtypes pathway)	GO:0042176 (regulation of protein catabolic process)
F:ME98	coral4	25	ENSG00000004059;ENSG00000023902;ENSG00000060491;ENSG00000086504;ENSG00000101421;ENSG00000104903;ENSG00000104969;ENSG00000105671;ENSG00000107874;ENSG00000122490;ENSG00000126254;ENSG00000131165;ENSG00000149182;ENSG00000149357;ENSG00000149792;ENSG00000160446;ENSG00000163930;ENSG00000167642;ENSG00000167657;ENSG00000167671;ENSG00000169692;ENSG00000174744;ENSG00000179922;ENSG00000185475;ENSG00000204356	ARF5;PLEKHO1;OGFR;MRPL28;CHMP4B;LYL1;SGTA;DDX49;CUEDC2;PQLC1;RBM42;CHMP1A;ARFGAP2;LAMTOR1;MRPL49;ZDHHC12;BAP1;SPINT2;DAPK3;UBXN6;AGPAT2;BRMS1;ZNF784;TMEM179B;NELFE	0	-1.32654	0.116625	0.19911	-0.295622	0.803928	0.918301	NA	NA	NA	NA	NA	-0.072957	0.459528	-0.0477655	0.62848	-0.019427	0.84406	0.50175	0.36073	0.49789	0.3647	0.47558	0	0	0	0	1	hsa04144 (Endocytosis)	NA (NA)	R-HSA-1632852 (Macroautophagy)	WP325 (Triacylglyceride Synthesis)	GO:0016197 (endosomal transport)
F:ME108	cyan	174	ENSG00000002834;ENSG00000006007;ENSG00000007047;ENSG00000007237;ENSG00000011422;ENSG00000014257;ENSG00000028137;ENSG00000054118;ENSG00000064601;ENSG00000064666;ENSG00000066027;ENSG00000067365;ENSG00000067596;ENSG00000071127;ENSG00000072062;ENSG00000072110;ENSG00000072864;ENSG00000076513;ENSG00000078369;ENSG00000082641;ENSG00000083812;ENSG00000084731;ENSG00000086062;ENSG00000090013;ENSG00000090432…	LASP1;GDE1;MARK4;GAS7;PLAUR;ACPP;TNFRSF1B;THRAP3;CTSA;CNN2;PPP2R5A;METTL22;DHX8;WDR1;PRKACA;ACTN1;NDE1;ANKRD13A;GNB1;NFE2L1;ZNF324;KIF3C;B4GALT1;BLVRB;MUL1;TFIP11;POLDIP3;PRPF6;ACOT8;ELF4;MAPK3;COTL1;MEFV;CPPED1;NDRG1;EEF1D;NUCB1;PLIN3;RAB3D;IQCE;PPP1R9B;SLC15A3;SH2B3;GNAI2;MAPKAPK3;NRBP1;RTN4;RAB32;UBN1;TSHZ3;SASH3;C7orf49;ADGRE5;TUBA1B;KCNS1;ZNFX1;VASP;PANK2;CD93;SLC35E1;THEMIS2;CASZ1;RAB11FIP4…	-0.0233895	NA	NA	NA	-0.292509	0.252796	0.513253	NA	NA	NA	NA	NA	-0.00584692	0.952796	0.00676724	0.945376	0.0110318	0.911068	0.59695	0.96433	0.30694	0.42355	0.049457	3	0	2	0	8	hsa04611 (Platelet activation)	P05912 (Dopamine receptor mediated signaling pathway)	R-HSA-6798695 (Neutrophil degranulation)	WP3945 (TYROBP Causal Network)	GO:0002446 (neutrophil mediated immunity)
F:ME105	darkgrey	129	ENSG00000010361;ENSG00000012232;ENSG00000014164;ENSG00000022976;ENSG00000059145;ENSG00000070444;ENSG00000070614;ENSG00000070731;ENSG00000072518;ENSG00000074370;ENSG00000076356;ENSG00000078804;ENSG00000079432;ENSG00000079435;ENSG00000085872;ENSG00000088038;ENSG00000089159;ENSG00000089505;ENSG00000089639;ENSG00000090020;ENSG00000099308;ENSG00000099331;ENSG00000099875;ENSG00000100034;ENSG00000101216…	FUZ;EXTL3;ZC3H3;ZNF839;UNKL;MNT;NDST1;ST6GALNAC2;MARK2;ATP2A3;PLXNA2;TP53INP2;CIC;LIPE;CHERP;CNOT3;PXN;CMTM1;GMIP;SLC9A1;MAST3;MYO9B;MKNK2;PPM1F;GMEB2;SLC7A6OS;MON1B;ARHGEF18;SUFU;TSPAN14;ALOX12;CAMKK2;DUSP22;GORASP1;ARID3A;MEF2D;KIF21B;TNFRSF10B;PREX1;FRMD8;GLIS2;PLEKHG3;KDM4B;POR;WDFY4;MLLT1;KIAA1683;ZSWIM4;ARHGEF11;BHLHE40;ADAM19;ALPK3;NOV;MESDC1;ZNF710;FURIN;GLYR1;BRD4;DMRTC2;WDTC1;ADAMTSL4;I…	-0.027027	NA	NA	NA	-0.299782	0.10076	0.292268	miR-124-3p	ENSG00000143382	-1.647	0.993	1	-0.0339979	0.730618	-0.0456102	0.644073	-0.0374603	0.704397	0.45918	0.35045	0.62118	0.25635	0.030985	0	0	1	0	3	hsa00534 (Glycosaminoglycan biosynthesis)	P00004 (Alzheimer disease-presenilin pathway)	R-HSA-194840 (Rho GTPase cycle)	WP1591 (Heart Development)	GO:0051056 (regulation of small GTPase mediated signal transduction)

## Sheet: MaleModules
Module					Prioritization	GSEA enrichments for RNA dysregulation			GSEA enrichments for DNAm dysregulation			Enrichments for DE miRNAs targets					Module eigengene correlation						Enrichments for SNPs associated to trait or disease (using GWAS datasets)					Enrichment with FDR <0,1					Top enrichment
ID	Code	NumGenes	All_Genes	All_Symbols	score	NES	pval	padj	ES	pval	padj	miRNAs	module genes overlapping with miRNA targets	ORA.logODs	ORA.pvals	ORA.padj	MDD status	Pval.MDDstatus	HDRS	Pval.HDRS	CTQ	Pval.CTQ	MDD (2018 23andMe)	Trauma (Complete pgc)	BipolarDisorde 1 (pgc)	Bipolar Disorder 2 (pgc)	BMI	KEGG	Panther	Reactome	Wikipathway	geneontology_Biological_Process	KEGG	Panther	Reactome	Wikipathway	geneontology_Biological_Process
M:ME48	royalblue	185	ENSG00000006007;ENSG00000021355;ENSG00000023318;ENSG00000023902;ENSG00000026297;ENSG00000034713;ENSG00000047249;ENSG00000049245;ENSG00000049541;ENSG00000051620;ENSG00000067560;ENSG00000070010;ENSG00000070501;ENSG00000074319;ENSG00000075142;ENSG00000075884;ENSG00000078668;ENSG00000086589;ENSG00000087086;ENSG00000088832;ENSG00000090487;ENSG00000092841;ENSG00000100410;ENSG00000100603;ENSG00000100612…	GDE1;SERPINB1;ERP44;PLEKHO1;RNASET2;GABARAPL2;ATP6V1H;VAMP3;RFC2;HEBP2;RHOA;UFD1L;POLB;TSG101;SRI;ARHGAP15;VDAC3;RBM22;FTL;FKBP1A;SPG21;MYL6;PHF5A;SNW1;DHRS7;RAE1;MAPRE1;CHMP4B;MYL12A;SMS;STK24;LYRM1;POLR2C;COTL1;LACTB;TRIP4;DECR1;OAZ1;FAM32A;BUD31;MED31;YWHAE;BST1;HTATIP2;CTSC;ARPC3;ARHGDIB;CLEC4A;COX6A1;DUSP22;IK;RNF130;ATP6V0E1;TUSC2;TMEM59;SYF2;TXNDC12;MYL12B;NPC2;TAF12;PAIP2;PLBD1;GLIPR2;NMI…	0.558812	2.10455	0.00011554	0.00115248	-0.351203	0.184084	0.382061	miR-124-3p/miR-1270/miR-320b/miR-181d-5p/miR-532-3p/miR-550a-3p/miR-92a-3p/miR-4286	ENSG00000122694,ENSG00000006007,ENSG00000047249,ENSG00000049245,ENSG00000051620,ENSG00000067560,ENSG00000074319,ENSG00000087086,ENSG00000101421,ENSG00000105058,ENSG00000109861,ENSG00000111348,ENSG00000112679,ENSG00000113269,ENSG00000113732,ENSG00000117862,ENSG00000123609,ENSG00000126581,ENSG00000133318,ENSG00000136048,ENSG00000136827,ENSG00000137767,ENSG00000138279,ENSG00000141378,ENSG00000143321…	2.189/3.321/2.383/2.158/2.438/2.522/1.711/2.279	0/0/0/0/0/0.001/0.005/0.016	5.00606076333749e-26/4.08283699593895e-05/4.65831315224188e-05/0.000567234363374603/0.000673769669365072/0.00261231970659271/0.00751969422689185/0.0214461376037086	0.411919	0.000719898	0.395508	0.00121774	0.0774763	0.542849	0.021611	0.72128	0.31709	0.57095	0.25822	1	3	44	1	6	hsa05130 (Pathogenic Escherichia coli infection)	P00023 (General transcription regulation)	R-HSA-6798695 (Neutrophil degranulation)	WP2272 (Pathogenic Escherichia coli infection)	GO:0002446 (neutrophil mediated immunity)
M:ME36	coral	44	ENSG00000027075;ENSG00000050405;ENSG00000063587;ENSG00000065802;ENSG00000072858;ENSG00000073849;ENSG00000076248;ENSG00000085563;ENSG00000101096;ENSG00000101417;ENSG00000101445;ENSG00000104635;ENSG00000107485;ENSG00000110318;ENSG00000118971;ENSG00000119401;ENSG00000120093;ENSG00000124203;ENSG00000131089;ENSG00000135414;ENSG00000135622;ENSG00000135631;ENSG00000151612;ENSG00000157985;ENSG00000158321…	PRKCH;LIMA1;ZNF275;ASB1;SIDT1;ST6GAL1;UNG;ABCB1;NFATC2;PXMP4;PPP1R16B;SLC39A14;GATA3;CEP126;CCND2;TRIM32;HOXB3;ZNF831;ARHGEF9;GDF11;SEMA4F;RAB11FIP5;ZNF827;AGAP1;AUTS2;HLCS;IKZF3;SLAMF6;DENND2D;PYGO2;NLRC3;FAM84B;TSPAN5;IFFO2;TMEM182;S1PR1;PDP2;RAD51D;ARL4C;MAGEE1;RP11-539L10.2;mars2;ATXN7L3B;OTUD7B	0.530973	-2.24918	0.000341413	0.00153182	-0.381497	0.0300858	0.106756	miR-124-3p/miR-320b/miR-4286/miR-532-3p/miR-181d-5p/miR-4516/miR-5585-3p/miR-550a-3p/miR-92a-3p	ENSG00000118971,ENSG00000104635,ENSG00000107485,ENSG00000169991,ENSG00000170989,ENSG00000188042,ENSG00000247626,ENSG00000253719/ENSG00000063587,ENSG00000118971,ENSG00000158321,ENSG00000188042/ENSG00000063587,ENSG00000167984/ENSG00000063587,ENSG00000253719/ENSG00000169991,ENSG00000170989/ENSG00000118971/ENSG00000118971/ENSG00000253719/ENSG00000118971	2.041/3.413/3.716/3.181/2.678/4.757/4.757/2.86/1.761	0/0/0.001/0.003/0.007/0.008/0.008/0.053/0.15	3.82490564197018e-05/3.82490564197018e-05/0.00346514172443359/0.0076003590619155/0.0126999059759781/0.0126999059759781/0.0126999059759781/0.0724444311758496/0.183393532656278	-0.453413	0.000168193	-0.448581	0.000201168	-0.0722983	0.570218	0.92899	0.41902	0.16421	0.28573	0.53584	0	0	0	0	0	hsa04658 (Th1 and Th2 cell differentiation)	P00057 (Wnt signaling pathway)	R-HSA-8878171 (Transcriptional regulation by RUNX1)	WP399 (Wnt Signaling Pathway and Pluripotency)	GO:0001818 (negative regulation of cytokine production)
M:ME45	maroon	68	ENSG00000011523;ENSG00000023445;ENSG00000064309;ENSG00000069020;ENSG00000069188;ENSG00000078269;ENSG00000080561;ENSG00000088387;ENSG00000094916;ENSG00000101544;ENSG00000102245;ENSG00000103494;ENSG00000110723;ENSG00000111371;ENSG00000112182;ENSG00000112294;ENSG00000113263;ENSG00000115977;ENSG00000118922;ENSG00000119138;ENSG00000121406;ENSG00000122484;ENSG00000123612;ENSG00000124374;ENSG00000127804…	CEP68;BIRC3;CDON;MAST4;SDK2;SYNJ2;MID2;DOCK9;CBX5;ADNP2;CD40LG;RPGRIP1L;EXPH5;SLC38A1;BACH2;ALDH5A1;ITK;AAK1;KLF12;KLF9;ZNF549;RPAP2;ACVR1C;PAIP2B;METTL16;ETS1;TAF4B;CASK;CNKSR2;RRP1B;CCDC141;SFMBT1;ACSL6;ZNF528;TTC39C;IL7R;ZNF507;TCAF2;ZIK1;BCL2;THEMIS;ABCD2;C12orf66;ARL10;GCNT4;ZC3H12D;CD28;ZNF329;TMEM30B;XKRX;SATB1;TTC3;ZNF530;ZSCAN30;TAF9B;SLC4A5;DPP4;ZNF568;BHLHB9;ZDBF2;CFAP44;ZNF891;SNHG14;…	0.463139	-2.17541	0.00039557	0.00153182	-0.437581	0.000101092	0.00185092	miR-181d-5p/miR-124-3p/miR-532-3p/miR-92a-3p/miR-320b	ENSG00000111371,ENSG00000134954,ENSG00000160208/ENSG00000064309,ENSG00000069020,ENSG00000127804,ENSG00000134954,ENSG00000163935,ENSG00000181894/ENSG00000112294,ENSG00000163935/ENSG00000069020,ENSG00000112182/ENSG00000160208	2.648/1.318/2.746/2.019/1.592	0.001/0.004/0.006/0.026/0.175	0.0115716891650521/0.0221312249165634/0.0237666680405691/0.0715344144527363/0.385574316797022	-0.347621	0.00488513	-0.323672	0.00908113	0.0789137	0.535366	0.82281	0.32116	0.19361	0.34578	0.72014	0	0	0	0	0	hsa04064 (NF-kappa B signaling pathway)	P00006 (Apoptosis signaling pathway)	R-HSA-5676594 (TNF receptor superfamily (TNFSF) members mediating non-canonical NF-kB pathway)	WP3863 (T-Cell antigen Receptor (TCR) pathway during Staphylococcus aureus infection)	GO:0032633 (interleukin-4 production)
M:ME35	pink4	41	ENSG00000005379;ENSG00000020633;ENSG00000027869;ENSG00000067057;ENSG00000067840;ENSG00000073350;ENSG00000090097;ENSG00000090565;ENSG00000099889;ENSG00000102312;ENSG00000103522;ENSG00000104731;ENSG00000104814;ENSG00000106089;ENSG00000106327;ENSG00000106351;ENSG00000114859;ENSG00000115085;ENSG00000127418;ENSG00000129347;ENSG00000132478;ENSG00000133895;ENSG00000158292;ENSG00000159733;ENSG00000161395…	TSPOAP1;RUNX3;SH2D2A;PFKP;PDZD4;LLGL2;PCBP4;RAB11FIP3;ARVCF;PORCN;IL21R;KLHDC4;MAP4K1;STX1A;TFR2;AGFG2;CLCN2;ZAP70;FGFRL1;KRI1;UNK;MEN1;GPR153;ZFYVE28;PGAP3;CCNF;TMCO4;ABCA3;SEMA4C;CARNS1;KLC2;DTX3;SLC25A42;TSEN54;ZNF74;SBK1;FAM83G;CTBP1-AS2;CARD11;TRBJ2-3;RP11-73O6.3	0.418418	-2.07852	0.000331236	0.00153182	-0.460679	0.000102354	0.00185092	miR-124-3p/miR-550a-3p/miR-320b	ENSG00000090565,ENSG00000103522,ENSG00000132478,ENSG00000174996/ENSG00000132478/ENSG00000132478	1.418/2.93/2.098	0.013/0.049/0.11	0.141150177983163/0.270490149397267/0.401862191458388	-0.359382	0.00353972	-0.363014	0.00319677	-0.151936	0.230721	0.066411	0.5706	0.6287	0.84233	0.32753	0	0	0	0	0	hsa04658 (Th1 and Th2 cell differentiation)	P05734 (Synaptic vesicle trafficking)	R-HSA-181429 (Serotonin Neurotransmitter Release Cycle)	WP69 (T-Cell antigen Receptor (TCR) Signaling Pathway)	GO:0009914 (hormone transport)
M:ME72	navajowhite1	48	ENSG00000002919;ENSG00000023330;ENSG00000028528;ENSG00000035862;ENSG00000044115;ENSG00000066322;ENSG00000068001;ENSG00000078369;ENSG00000091106;ENSG00000104324;ENSG00000104687;ENSG00000109016;ENSG00000110931;ENSG00000111684;ENSG00000115216;ENSG00000115956;ENSG00000116701;ENSG00000124357;ENSG00000130821;ENSG00000130830;ENSG00000131042;ENSG00000131236;ENSG00000135677;ENSG00000135926;ENSG00000136167…	SNX11;ALAS1;SNX1;TIMP2;CTNNA1;ELOVL1;HYAL2;GNB1;NLRC4;CPQ;GSR;DHRS7B;CAMKK2;LPCAT3;NRBP1;PLEK;NCF2;NAGK;SLC6A8;MPP1;LILRB2;CAP1;GNS;TMBIM1;LCP1;AOAH;TLR2;IDH1;TMBIM6;ATP6V1B2;PAK1;ARL11;ADIPOR1;ANO10;ZDHHC3;PRKCD;SYK;CD300A;SIGLEC7;PGM2;C2CD2L;MYD88;MCTP1;GRB2;IST1;SERPINA1;SIRPA;RP11-180M15.7	0.401277	1.88819	0.000279681	0.00153182	-0.365593	0.16845	0.363324	miR-124-3p/miR-181d-5p/miR-320b/miR-23a-5p/miR-4286/miR-532-3p/miR-92a-3p	ENSG00000066322,ENSG00000078369,ENSG00000104324,ENSG00000104687,ENSG00000109016,ENSG00000115216,ENSG00000116701,ENSG00000131236,ENSG00000149269,ENSG00000160746,ENSG00000163812,ENSG00000169299,ENSG00000172936,ENSG00000177885/ENSG00000131236,ENSG00000163812,ENSG00000182149/ENSG00000131236,ENSG00000139644/ENSG00000137462/ENSG00000139644/ENSG00000139644/ENSG00000160746	2.513/2.996/2.633/3.977/2.935/2.401/1.674	0/0/0.008/0.018/0.049/0.082/0.163	1.55014969619391e-11/0.00208095815245853/0.0297079109556525/0.0482693929037312/0.107694341102686/0.150490170517376/0.255415634648533	0.426324	0.000443747	0.4163	0.000622792	-0.0631213	0.620238	0.71823	0.38862	0.16984	0.31936	0.081718	1	0	2	0	21	hsa04380 (Osteoclast differentiation)	P00010 (B cell activation)	R-HSA-6798695 (Neutrophil degranulation)	WP2865 (IL1 and megakaryocytes in obesity)	GO:0002446 (neutrophil mediated immunity)
M:ME34	lightsteelblue1	82	ENSG00000004139;ENSG00000005884;ENSG00000006025;ENSG00000015133;ENSG00000015676;ENSG00000019485;ENSG00000043143;ENSG00000055483;ENSG00000065491;ENSG00000066117;ENSG00000067191;ENSG00000070814;ENSG00000072071;ENSG00000087258;ENSG00000088808;ENSG00000089094;ENSG00000090924;ENSG00000096433;ENSG00000097007;ENSG00000100403;ENSG00000101224;ENSG00000102226;ENSG00000103264;ENSG00000104228;ENSG00000107742…	SARM1;ITGA3;OSBPL7;CCDC88C;NUDCD3;PRDM11;JADE2;USP36;TBC1D22B;SMARCD1;CACNB1;TCOF1;ADGRL1;GNAO1;PPP1R13B;KDM2B;PLEKHG2;ITPR3;ABL1;ZC3H7B;CDC25B;USP11;FBXO31;TRIM35;SPOCK2;CEP72;TFDP2;FAM117A;SLC25A23;CEP250;LRFN3;HIVEP3;DGCR8;CCDC136;DNMT1;PLXNA3;NUP210;ADCY3;SLC7A1;MAP3K12;BAHD1;CELSR2;CCDC120;PPRC1;CNNM2;TNKS1BP1;INCENP;OBSCN;ZNF276;PCNT;PCSK7;FMNL3;GRM2;FOXK1;NOL6;AQP3;DCHS1;TNXB;POLR3D;CDC42B…	0.396262	-2.21214	0.000433276	0.00153182	-0.399915	0.000601263	0.00472421	miR-532-3p/miR-124-3p/miR-181d-5p/miR-4286/miR-550a-3p/miR-92a-3p	ENSG00000140320,ENSG00000164916,ENSG00000174282/ENSG00000107742,ENSG00000112877,ENSG00000140320,ENSG00000174282,ENSG00000179981,ENSG00000185989/ENSG00000174282,ENSG00000179981/ENSG00000140320/ENSG00000164916/ENSG00000174282	2.964/1.13/2.055/2.4/2.237/1.139	0/0.01/0.024/0.082/0.096/0.262	0.00449588847306478/0.0546893208439371/0.0891432194605923/0.211324573808018/0.211324573808018/0.479694717508593	-0.366178	0.00292239	-0.352112	0.00432576	-0.109319	0.389845	0.78195	0.2377	0.64534	0.67017	0.93762	2	0	0	0	0	hsa04724 (Glutamatergic synapse)	P00040 (Metabotropic glutamate receptor group II pathway)	R-HSA-112043 (PLC beta mediated events)	WP2446 (Retinoblastoma Gene in Cancer)	GO:0050808 (synapse organization)
M:ME86	coral2	62	ENSG00000005381;ENSG00000011426;ENSG00000012223;ENSG00000065618;ENSG00000070371;ENSG00000086548;ENSG00000095932;ENSG00000096006;ENSG00000100448;ENSG00000101425;ENSG00000102837;ENSG00000104043;ENSG00000104918;ENSG00000112146;ENSG00000115425;ENSG00000118113;ENSG00000118513;ENSG00000118520;ENSG00000124469;ENSG00000133063;ENSG00000134627;ENSG00000134827;ENSG00000139572;ENSG00000140284;ENSG00000142583…	MPO;ANLN;LTF;COL17A1;CLTCL1;CEACAM6;SMIM24;CRISP3;CTSG;BPI;OLFM4;ATP8B4;RETN;FBXO9;PECR;MMP8;MYB;ARG1;CEACAM8;CHIT1;PIWIL4;TCN1;GPR84;SLC27A2;SLC2A5;RAB13;ITGA9;LCN2;MS4A3;AFF2;TDRD9;ERG;DZIP1L;M1AP;TFF3;PTX3;CAMP;HMGB2;KCNK5;DEFA4;RNASE2;RNASE3;AZU1;OLR1;ABCA13;HYAL3;BCL2L15;PRTN3;SLC28A3;ELANE;DNAH10;SUCNR1;PRRT4;DPY19L1P1;DEFA3;SERPINB10;HP;CLEC5A;MILR1;CD24;DOC2B;RP11-24F11.5	0.357843	2.12705	0.000134898	0.00115248	-0.335938	0.546947	0.707814	miR-124-3p/miR-550a-3p	ENSG00000065618,ENSG00000112146,ENSG00000115425,ENSG00000164047,ENSG00000257017/ENSG00000173391	1.228/2.517	0.012/0.073	0.134767960847813/0.404091566791592	0.331462	0.00746117	0.326438	0.00847392	0.22426	0.0748334	0.0047704	0.10223	0.17349	0.90362	0.21675	0	0	4	0	20	hsa05146 (Amoebiasis)	P00034 (Integrin signalling pathway)	R-HSA-6798695 (Neutrophil degranulation)	WP1533 (Vitamin B12 Metabolism)	GO:0036230 (granulocyte activation)
M:ME85	violet	105	ENSG00000005075;ENSG00000013583;ENSG00000041988;ENSG00000042753;ENSG00000071859;ENSG00000080189;ENSG00000082014;ENSG00000086504;ENSG00000088992;ENSG00000090581;ENSG00000091947;ENSG00000095380;ENSG00000100142;ENSG00000100294;ENSG00000100319;ENSG00000100802;ENSG00000101182;ENSG00000101439;ENSG00000102007;ENSG00000102030;ENSG00000102125;ENSG00000102890;ENSG00000103266;ENSG00000103363;ENSG00000104522…	POLR2J;HEBP1;THAP3;AP2S1;FAM50A;SLC35C2;SMARCD3;MRPL28;TESC;GNPTG;TMEM101;NANS;POLR2F;MCAT;ZMAT5;C14orf93;PSMA7;CST3;PLP2;NAA10;TAZ;ELMO3;STUB1;TCEB2;TSTA3;TFPT;KXD1;ZNHIT1;BAG1;PSMD9;GMDS;PCGF1;LRRC42;MAD2L2;SDHB;APH1A;PEX16;CLTA;SMUG1;KLHDC3;CHCHD5;PRDX5;TIMM17B;UQCR11;ATF4;EMC4;SAT1;UBAC1;UCK1;UBE2M;UBAC2;BLOC1S1;SMPD2;DCTN3;MTCH1;SERF2;MVB12A;PFDN2;JTB;ABT1;SURF1;GSTO1;LAMTOR1;TMEM219;TIMM8B;…	0.335771	1.85762	0.000125109	0.00115248	-0.405134	0.00151576	0.0083367	miR-124-3p/miR-92a-3p/miR-532-3p	ENSG00000126432,ENSG00000126768,ENSG00000130066,ENSG00000130725,ENSG00000137409,ENSG00000140264,ENSG00000158552,ENSG00000173928,ENSG00000174744,ENSG00000175806/ENSG00000126432,ENSG00000161526/ENSG00000137409	1.394/1.585/1.619	0/0.057/0.171	0.00129383298161991/0.314649319545166/0.627474992376265	0.311361	0.0122663	0.289397	0.0203724	0.0157833	0.901485	0.6243	0.33339	0.7979	0.45775	0.12908	0	0	11	0	0	hsa03020 (RNA polymerase)	P04397 (p53 pathway by glucose deprivation)	R-HSA-167238 (Pausing and recovery of Tat-mediated HIV elongation)	WP405 (Eukaryotic Transcription Initiation)	GO:0006383 (transcription by RNA polymerase III)
M:ME90	steelblue	113	ENSG00000004399;ENSG00000006756;ENSG00000010327;ENSG00000010610;ENSG00000014914;ENSG00000020577;ENSG00000031081;ENSG00000038427;ENSG00000068724;ENSG00000074964;ENSG00000082397;ENSG00000085265;ENSG00000092051;ENSG00000093072;ENSG00000100364;ENSG00000101337;ENSG00000103066;ENSG00000103544;ENSG00000103966;ENSG00000104081;ENSG00000104774;ENSG00000104972;ENSG00000105383;ENSG00000107551;ENSG00000108829…	PLXND1;ARSD;STAB1;CD4;MTMR11;SAMD4A;ARHGAP31;VCAN;TTC7A;ARHGEF10L;EPB41L3;FCN1;JPH4;CECR1;KIAA0930;TM9SF4;PLA2G15;C16orf62;EHD4;BMF;MAN2B1;LILRB1;CD33;RASSF4;LRRC59;EFTUD2;MS4A4A;ADGRD1;GORASP1;STEAP3;LOXL3;FKBP15;FLVCR2;TGFBI;TNFRSF8;LRP1;SLC12A4;IQSEC2;IRF5;SLC27A1;EMILIN2;DLG4;EPHB2;CTIF;SORT1;ACP2;DAGLA;SLC37A2;TNS3;FAM129B;MYO7A;MYOF;SUOX;RTN1;TTYH2;ADAM15;SLC27A3;GALNT2;KCNMB1;FGD2;SIDT2;PL…	0.331257	1.8332	0.000123609	0.00115248	-0.405787	0.00020016	0.00185092	miR-181d-5p/miR-92a-3p/miR-124-3p	ENSG00000133216/ENSG00000103066/ENSG00000111452,ENSG00000133216	1.041/0.818/-0.289	0.284/0.342/0.721	1/1/1	0.278262	0.025988	0.281095	0.0244479	-0.061867	0.627218	0.90382	0.49359	0.82266	0.59831	0.50397	1	0	0	1	0	hsa04142 (Lysosome)	P00004 (Alzheimer disease-presenilin pathway)	R-HSA-1474244 (Extracellular matrix organization)	WP3945 (TYROBP Causal Network)	GO:0042107 (cytokine metabolic process)
M:ME47	palevioletred2	49	ENSG00000004961;ENSG00000008394;ENSG00000023697;ENSG00000049860;ENSG00000050130;ENSG00000054116;ENSG00000057608;ENSG00000065154;ENSG00000068697;ENSG00000078237;ENSG00000085871;ENSG00000088986;ENSG00000101160;ENSG00000104671;ENSG00000111237;ENSG00000111843;ENSG00000115446;ENSG00000120265;ENSG00000122884;ENSG00000123595;ENSG00000128245;ENSG00000129625;ENSG00000134046;ENSG00000134056;ENSG00000134153…	HCCS;MGST1;DERA;HEXB;JKAMP;TRAPPC3;GDI2;OAT;LAPTM4A;TIGAR;MGST2;DYNLL1;CTSZ;DCTN6;VPS29;TMEM14C;UNC50;PCMT1;P4HA1;RAB9A;YWHAH;REEP5;MBD2;MRPS36;EMC7;CCNH;KDELR2;HADHB;SEC11A;C1orf162;CREG1;CALM2;IL18;C4orf33;RCAN1;AZI2;CHCHD4;PEX2;PRDX3;GHITM;FAM96A;ARF4;SMPDL3A;FUCA1;ADI1;UTP11;METTL9;SNX2;HSBP1	0.330472	1.69055	0.00139606	0.00289749	-0.427353	0.00700711	0.0321159	miR-124-3p/miR-23a-5p/miR-92a-3p/miR-1270/miR-320b	ENSG00000008394,ENSG00000049860,ENSG00000050130,ENSG00000068697,ENSG00000134480,ENSG00000140612,ENSG00000168374/ENSG00000054116,ENSG00000134046/ENSG00000068697,ENSG00000101160/ENSG00000050130/ENSG00000068697	1.799/4.649/2.347/3.263/1.919	0/0/0.014/0.036/0.13	0.000725657517381466/0.000725657517381466/0.0514797923130281/0.0976699414193659/0.285053483805193	0.354963	0.00400085	0.355293	0.00396467	0.165563	0.191064	0.49792	0.079656	0.2573	0.74698	0.42228	0	0	3	0	4	hsa04142 (Lysosome)	P00029 (Huntington disease)	R-HSA-948021 (Transport to the Golgi and subsequent modification)	WP1544 (MicroRNAs in cardiomyocyte hypertrophy)	GO:0016042 (lipid catabolic process)
M:ME71	white	121	ENSG00000006062;ENSG00000010295;ENSG00000013288;ENSG00000014216;ENSG00000033100;ENSG00000039523;ENSG00000054967;ENSG00000061273;ENSG00000063244;ENSG00000064666;ENSG00000064687;ENSG00000067365;ENSG00000073050;ENSG00000076356;ENSG00000079805;ENSG00000086544;ENSG00000087152;ENSG00000087365;ENSG00000088038;ENSG00000089639;ENSG00000090372;ENSG00000090432;ENSG00000092098;ENSG00000092929;ENSG00000099331…	MAP3K14;IFFO1;MAN2B2;CAPN1;CHPF2;FAM65A;RELT;HDAC7;U2AF2;CNN2;ABCA7;METTL22;XRCC1;PLXNA2;DNM2;ITPKC;ATXN7L3;SF3B2;CNOT3;GMIP;STRN4;MUL1;RNF31;UNC13D;MYO9B;TFIP11;GTPBP1;RIN3;DCAF11;PCIF1;RNF40;VPS18;CLPTM1;CD37;TYK2;RAB3A;OGDH;LFNG;IQCE;PPP1R9B;SASH3;IRF1;OPRL1;RRBP1;HECTD3;ZNF384;FGD3;KIF1C;RIPK3;STARD8;ZNF341;PIAS3;MICAL1;FHOD1;KLC4;GUCD1;PARVG;ZNF710;CPNE2;KATNB1;OSGIN1;GALNS;BCAS3;AKT1;SIGLEC…	0.322701	1.76919	0.000122324	0.00115248	-0.410016	0.00020016	0.00185092	miR-92a-3p/miR-181d-5p/miR-124-3p	ENSG00000138964,ENSG00000144040/ENSG00000182944/ENSG00000160703	1.443/0.973/-1.05	0.073/0.301/0.935	0.806426421626223/1/1	0.277339	0.026507	0.262121	0.0364047	-0.171073	0.176504	0.62727	0.27892	0.11513	0.63201	0.5521	0	0	0	0	0	hsa04668 (TNF signaling pathway)	P05734 (Synaptic vesicle trafficking)	R-HSA-177504 (Retrograde neurotrophin signalling)	WP2332 (Interleukin-11 Signaling Pathway)	GO:0032386 (regulation of intracellular transport)
M:ME56	darkturquoise	129	ENSG00000008018;ENSG00000037241;ENSG00000041357;ENSG00000065518;ENSG00000083457;ENSG00000091164;ENSG00000100567;ENSG00000100804;ENSG00000102309;ENSG00000103035;ENSG00000105617;ENSG00000106803;ENSG00000108826;ENSG00000109083;ENSG00000109536;ENSG00000112695;ENSG00000113312;ENSG00000113811;ENSG00000115128;ENSG00000115685;ENSG00000115944;ENSG00000116586;ENSG00000118640;ENSG00000119013;ENSG00000119705…	PSMB1;RPL26L1;PSMA4;NDUFB4;ITGAE;TXNL1;PSMA3;PSMB5;PIN4;PSMD7;LENG1;SEC61B;MRPL27;IFT20;FRG1;COX7A2;TTC1;SELK;SF3B6;PPP1R7;COX7A2L;LAMTOR2;VAMP8;NDUFB3;SLIRP;ENY2;CSTA;PFDN5;ORMDL2;ATP5E;NDUFA1;SNRPB2;DYNLRB1;EIF2S2;MMP24-AS1;COX6B1;TXNDC17;EAPP;DAD1;ELOF1;ARPC1B;EMC8;COX7B;NDUFA2;POMP;LAMTOR5;TMEM258;PRADC1;TXN;COX17;GTF2A2;SRP14;C18orf21;ANAPC11;TXNL4A;EMP3;ENSA;SNRPG;CWC15;SAP18;ATP5J;RRAGA;C1…	0.321701	1.84683	0.000121536	0.00115248	-0.422279	0.00122599	0.00709784	miR-124-3p/miR-181d-5p/miR-320b	ENSG00000041357,ENSG00000120533,ENSG00000121552,ENSG00000123353,ENSG00000132963,ENSG00000136810,ENSG00000164032,ENSG00000164167,ENSG00000177868,ENSG00000186132,ENSG00000197956/ENSG00000041357,ENSG00000120533/ENSG00000120533	1.283/1.602/0.951	0/0.055/0.307	0.00161965319571881/0.304785076268351/1	0.273707	0.0286352	0.250309	0.0460556	0.161429	0.202537	0.19573	0.74453	0.56959	0.41242	0.61816	11	0	207	5	10	hsa04714 (Thermogenesis)	P00049 (Parkinson disease)	R-HSA-1428517 (The citric acid (TCA) cycle and respiratory electron transport)	WP111 (Electron Transport Chain (OXPHOS system in mitochondria))	GO:0009141 (nucleoside triphosphate metabolic process)
M:ME26	mediumpurple3	84	ENSG00000071794;ENSG00000075407;ENSG00000081665;ENSG00000083844;ENSG00000100478;ENSG00000100592;ENSG00000101935;ENSG00000106086;ENSG00000106771;ENSG00000107779;ENSG00000108506;ENSG00000109680;ENSG00000111224;ENSG00000112144;ENSG00000113441;ENSG00000116005;ENSG00000116138;ENSG00000117020;ENSG00000119661;ENSG00000119812;ENSG00000125484;ENSG00000125630;ENSG00000127311;ENSG00000128000;ENSG00000128059…	HLTF;ZNF37A;ZNF506;ZNF264;AP4S1;DAAM1;AMMECR1;PLEKHA8;TMEM245;BMPR1A;INTS2;TBC1D19;PARP11;ICK;LNPEP;PCYOX1;DNAJC16;AKT3;DNAL1;FAM98A;GTF3C4;POLR1B;HELB;ZNF780B;PPAT;SCO1;TMEM241;USP37;NCBP1;NEK1;CNOT6L;ALG10;PHLDA1;PIGM;RHBDD1;SPATA5;G3BP1;LANCL3;RNF144A;UHMK1;GPD1L;CYP2U1;SLC26A2;ZFYVE9;CLDN12;ELK4;UBR1;DFFA;WDCP;METTL2B;PGM2L1;NEMP1;ZBTB5;ZNF562;ERCC4;PDE4DIP;KDELC2;DHFR2;PRKX;RBM43;PURA;NAP1L2…	0.31929	-2.34271	0.000430849	0.00153182	-0.320633	0.715597	0.828586	miR-124-3p/miR-320b/miR-92a-3p/miR-1270/miR-4286/miR-550a-3p/miR-532-3p	ENSG00000071794,ENSG00000100592,ENSG00000151692,ENSG00000157077,ENSG00000168795,ENSG00000184898,ENSG00000196417/ENSG00000117020,ENSG00000264364/ENSG00000119661,ENSG00000196172/ENSG00000117020/ENSG00000264364/ENSG00000119661/ENSG00000264364	1.26/2.073/1.808/2.724/2.376/2.213/1.842	0.003/0.023/0.038/0.06/0.084/0.098/0.139	0.0294948738065965/0.129160118795566/0.140613324452046/0.165475982475658/0.180191319180534/0.180191319180534/0.218962954043279	-0.396972	0.0011632	-0.382221	0.00182849	0.0252303	0.843127	0.17052	0.43405	0.54758	0.25969	0.716	0	0	0	0	0	hsa00250 (Alanine, aspartate and glutamate metabolism)	P00052 (TGF-beta signaling pathway)	R-HSA-114452 (Activation of BH3-only proteins)	WP2857 (Mesodermal Commitment Pathway)	GO:0098781 (ncRNA transcription)
M:ME77	saddlebrown	117	ENSG00000005022;ENSG00000010256;ENSG00000013275;ENSG00000042493;ENSG00000054148;ENSG00000067829;ENSG00000067836;ENSG00000069998;ENSG00000072506;ENSG00000075415;ENSG00000079459;ENSG00000084207;ENSG00000084754;ENSG00000091640;ENSG00000093010;ENSG00000094914;ENSG00000099341;ENSG00000100097;ENSG00000100321;ENSG00000100577;ENSG00000101365;ENSG00000101444;ENSG00000103274;ENSG00000103811;ENSG00000105518…	SLC25A5;UQCRC1;PSMC4;CAPG;PHPT1;IDH3G;ROGDI;CECR5;HSD17B10;SLC25A3;FDFT1;GSTP1;HADHA;SPAG7;COMT;AAAS;PSMD8;LGALS1;SYNGR1;GSTZ1;IDH3B;AHCY;NUBP1;CTSH;TMEM205;BCL7B;TBL2;CREB3;RAB34;COMMD9;ATP5B;TPI1;BYSL;PCCB;CYB561D2;SNX17;TMEM9;GALE;P3H1;AKR1A1;PRDX1;SLC46A2;MAPKAP1;EIF2B2;SIL1;SLC35B1;BATF3;DNPEP;SNX21;SERPINB6;SLC25A19;MIF4GD;SNRPB;PSMB2;RRAS;ECHS1;ATP6V1F;NDUFA10;TRPM4;EIF5A;CNDP2;AGAP3;P2RX4…	0.31697	1.77723	0.000122669	0.00115248	-0.407351	0.000401768	0.00339957	miR-124-3p/miR-4286/miR-320b/miR-92a-3p	ENSG00000042493,ENSG00000067829,ENSG00000067836,ENSG00000105518,ENSG00000109113,ENSG00000110442,ENSG00000157379/ENSG00000075415/ENSG00000075415/ENSG00000105518	0.929/2.044/1.049/0.783	0.016/0.115/0.283/0.352	0.173965486072782/0.634606396547695/0.966961927430389/0.966961927430389	0.287324	0.0213317	0.274225	0.0283229	-0.00832354	0.947953	0.32968	0.22091	0.55469	0.071869	0.45448	12	0	45	0	4	hsa01200 (Carbon metabolism)	P00014 (Cholesterol biosynthesis)	R-HSA-1428517 (The citric acid (TCA) cycle and respiratory electron transport)	WP78 (TCA Cycle (aka Krebs or citric acid cycle))	GO:0044282 (small molecule catabolic process)
M:ME82	darkolivegreen2	32	ENSG00000013563;ENSG00000079739;ENSG00000100865;ENSG00000102144;ENSG00000105402;ENSG00000105443;ENSG00000107745;ENSG00000110619;ENSG00000111640;ENSG00000111652;ENSG00000125900;ENSG00000131069;ENSG00000136026;ENSG00000136816;ENSG00000137404;ENSG00000153551;ENSG00000157020;ENSG00000158864;ENSG00000159348;ENSG00000159352;ENSG00000162517;ENSG00000164088;ENSG00000166145;ENSG00000167461;ENSG00000167565…	DNASE1L1;PGM1;CINP;PGK1;NAPA;CYTH2;MICU1;CARS;GAPDH;COPS7A;SIRPD;ACSS2;CKAP4;TOR1B;NRM;CMTM7;SEC13;NDUFS2;CYB5R1;PSMD4;PEF1;PPM1M;SPINT1;RAB8A;SERTAD3;CD2BP2;PGAM1;AGTRAP;CDC42EP4;BCAP31;ATG7;C19orf38	0.314936	1.77006	0.000892193	0.00208811	-0.365735	0.291891	0.491147	miR-124-3p/miR-92a-3p/miR-181d-5p	ENSG00000013563,ENSG00000079739,ENSG00000102144,ENSG00000107745,ENSG00000111652,ENSG00000136026,ENSG00000137404,ENSG00000158864,ENSG00000167565,ENSG00000177674/ENSG00000107745,ENSG00000167565/ENSG00000136026	2.582/2.773/2.303	0/0.006/0.09	1.22402485738164e-08/0.0338984327533183/0.33069925325992	0.435888	0.000317958	0.420919	0.000533428	-0.0401343	0.752858	0.88486	0.084485	0.37575	0.94488	0.97795	3	2	1	5	20	hsa00010 (Glycolysis / Gluconeogenesis)	P00024 (Glycolysis)	R-HSA-70263 (Gluconeogenesis)	WP1946 (Cori Cycle)	GO:0046939 (nucleotide phosphorylation)
M:ME37	pink	203	ENSG00000001561;ENSG00000007402;ENSG00000010810;ENSG00000017483;ENSG00000021762;ENSG00000026652;ENSG00000026751;ENSG00000048028;ENSG00000060140;ENSG00000069702;ENSG00000073861;ENSG00000074590;ENSG00000075234;ENSG00000080493;ENSG00000082458;ENSG00000088179;ENSG00000089692;ENSG00000099219;ENSG00000100027;ENSG00000100219;ENSG00000100298;ENSG00000100385;ENSG00000100427;ENSG00000100450;ENSG00000100453…	ENPP4;CACNA2D2;FYN;SLC38A5;OSBPL5;AGPAT4;SLAMF7;USP28;STYK1;TGFBR3;TBX21;NUAK1;TTC38;SLC4A4;DLG3;PTPN4;LAG3;ERMP1;YPEL1;XBP1;APOBEC3H;IL2RB;MLC1;GZMH;GZMB;SMAD7;NCALD;KIR3DX1;NKG7;RGS9;B3GAT1;NAA40;IFNG;GNPTAB;ENPP5;PDGFRB;CBLB;GNLY;C1orf21;UAP1;RAB29;CD160;PIK3R3;FASLG;B4GALT6;GPR68;RDH10;XPNPEP2;OPTN;BFSP1;AMOT;PALLD;EPB41L4A;RFTN1;C19orf12;C19orf57;SYT11;LGR6;RRAS2;KLRD1;PRR5L;FGFBP2;SYTL2;RMD…	0.312543	-2.52767	0.000815661	0.00199384	-0.378646	0.0007	0.00513333	miR-320b/miR-181d-5p/miR-1270/miR-550a-3p/miR-92a-3p/miR-124-3p	ENSG00000101665,ENSG00000117461,ENSG00000188636/ENSG00000101665,ENSG00000117461/ENSG00000196169/ENSG00000117461/ENSG00000101665/ENSG00000101665,ENSG00000117461	1.597/1.149/1.842/1.331/0.232/-0.875	0.02/0.12/0.14/0.222/0.529/0.943	0.214975656117873/0.512410606173941/0.512410606173941/0.610322733384701/1/1	-0.267655	0.032499	-0.275697	0.0274518	-0.108494	0.393453	0.89594	0.39292	0.84626	0.98006	0.79367	9	0	8	2	21	hsa04650 (Natural killer cell mediated cytotoxicity)	P00012 (Cadherin signaling pathway)	R-HSA-198933 (Immunoregulatory interactions between a Lymphoid and a non-Lymphoid cell)	WP3893 (Development and heterogeneity of the ILC family)	GO:0006968 (cellular defense response)
M:ME20	yellow3	43	ENSG00000048991;ENSG00000065150;ENSG00000070061;ENSG00000070950;ENSG00000078246;ENSG00000085511;ENSG00000086102;ENSG00000086712;ENSG00000087263;ENSG00000088876;ENSG00000094880;ENSG00000101868;ENSG00000103356;ENSG00000106785;ENSG00000107077;ENSG00000108433;ENSG00000113048;ENSG00000113360;ENSG00000125846;ENSG00000131844;ENSG00000133561;ENSG00000133706;ENSG00000134014;ENSG00000135108;ENSG00000135966…	R3HDM1;IPO5;IKBKAP;RAD18;TULP3;MAP3K4;NFX1;TXLNG;OGFOD1;ZNF343;CDC23;POLA1;EARS2;TRIM14;KDM4C;GOSR2;MRPS27;DROSHA;ZNF133;MCCC2;GIMAP6;LARS;ELP3;FBXO21;TGFBRAP1;EPRS;TSTD2;LRPPRC;ACKR3;MCPH1;GART;GMPS;BMS1;NOLC1;ZNF202;TSR1;PPIP5K1;DDX10;THNSL1;IARS;SFMBT2;RP11-553L6.2;ZNF280B	0.310877	-1.93749	0.000335909	0.00153182	0.301375	0.308943	0.50722	miR-124-3p/miR-92a-3p/miR-181d-5p/miR-1270/miR-532-3p/miR-320b	ENSG00000085511,ENSG00000087263,ENSG00000136925,ENSG00000144476,ENSG00000163655,ENSG00000275004/ENSG00000113360,ENSG00000134014,ENSG00000136925/ENSG00000085511,ENSG00000113360/ENSG00000163655/ENSG00000144476/ENSG00000136925	1.776/2.883/2.701/3.394/2.511/2.05	0/0.001/0.007/0.031/0.074/0.115	0.0029034744567406/0.0029034744567406/0.0260648354197786/0.0858836453855009/0.162466355718712/0.210160773699055	-0.394551	0.00125462	-0.366189	0.00292146	0.0026639	0.983332	0.75032	0.73116	0.054869	0.4899	0.381	1	0	3	0	2	hsa00970 (Aminoacyl-tRNA biosynthesis)	P02746 (Heme biosynthesis)	R-HSA-2408517 (SeMet incorporation into proteins)	WP3925 (Amino Acid metabolism)	GO:0006520 (cellular amino acid metabolic process)
M:ME29	red	219	ENSG00000003056;ENSG00000005810;ENSG00000008311;ENSG00000009335;ENSG00000009954;ENSG00000030066;ENSG00000035928;ENSG00000040199;ENSG00000047365;ENSG00000049883;ENSG00000051825;ENSG00000052126;ENSG00000053524;ENSG00000058056;ENSG00000063127;ENSG00000065183;ENSG00000066933;ENSG00000067141;ENSG00000068796;ENSG00000070882;ENSG00000072736;ENSG00000074966;ENSG00000078687;ENSG00000081177;ENSG00000081386…	M6PR;MYCBP2;AASS;UBE3C;BAZ1B;NUP160;RFC1;PHLPP2;ARAP2;PTCD2;MPHOSPH9;PLEKHA5;MCF2L2;USP13;SLC6A16;WDR3;MYO9A;NEO1;KIF2A;OSBPL3;NFATC3;TXK;TNRC6C;EXD2;ZNF510;GEMIN5;PALB2;FAM234B;DOCK3;RBM41;TNRC6A;SUPT16H;KIAA0586;MTMR8;ARHGEF7;SLC25A15;VWA8;UBFD1;KNOP1;TNFRSF10A;RBM28;HPS5;MDN1;ASCC3;EXOC2;CLIC5;PAPD7;NNT;NUP155;TBCCD1;USP9Y;ACVR2B;KANSL3;EPHA4;ALMS1;CTH;MTR;DIEXF;CASP8AP2;HEATR1;CNTRL;NEK9;GPAM…	0.300786	-2.46831	0.00087108	0.00208302	-0.316107	0.89971	0.942553	miR-1270/miR-92a-3p/miR-23a-5p/miR-4286/miR-320b/miR-181d-5p/miR-124-3p	ENSG00000058056,ENSG00000166167/ENSG00000078687,ENSG00000130338,ENSG00000166750/ENSG00000078687/ENSG00000078687/ENSG00000078687/ENSG00000078687/ENSG00000130338,ENSG00000173482	2.459/1.255/2.459/1.417/0.422/0.38/-0.951	0.011/0.047/0.078/0.206/0.464/0.478/0.958	0.119526840759402/0.257866691024141/0.286042588054404/0.565489498321561/0.876848616432887/0.876848616432887/1	-0.323794	0.00905361	-0.303904	0.014632	-0.0650544	0.609548	0.024729	0.47136	0.25045	0.57646	0.72078	2	1	1	2	0	hsa03460 (Fanconi anemia pathway)	P00059 (p53 pathway)	R-HSA-5685942 (HDR through Homologous Recombination (HRR))	WP2857 (Mesodermal Commitment Pathway)	GO:0006260 (DNA replication)
M:ME110	orangered4	85	ENSG00000005249;ENSG00000022267;ENSG00000041353;ENSG00000047597;ENSG00000050393;ENSG00000061676;ENSG00000065534;ENSG00000086232;ENSG00000099256;ENSG00000101162;ENSG00000101856;ENSG00000102362;ENSG00000102804;ENSG00000104267;ENSG00000107863;ENSG00000108960;ENSG00000113924;ENSG00000115170;ENSG00000115290;ENSG00000117586;ENSG00000119636;ENSG00000119684;ENSG00000123091;ENSG00000123739;ENSG00000124635…	PRKAR2B;FHL1;RAB27B;XK;MCUR1;NCKAP1;MYLK;EIF2AK1;PRTFDC1;TUBB1;PGRMC1;SYTL4;TSC22D1;CA2;ARHGAP21;MMD;HGD;ACVR1;GRB14;TNFSF4;BBOF1;MLH3;RNF11;PLA2G12A;HIST1H2BJ;GRHL1;SPX;IGF2BP3;HEMGN;PDE5A;STON2;MEIS1;ARHGAP18;ENKUR;ASAP2;ZNF385D;DAB2;BMP6;TMSB4Y;MAP3K7CL;CXCL5;ELOVL7;ARMC3;AVPR1A;SDPR;P2RY12;PTK2;LIMS1;KCND3;MYEOV;TRAPPC3L;C15orf54;ANO6;FAM26E;MTURN;PBX1;C2orf88;HIST1H2AG;DNM3;SH3BGRL2;ATL1;MT-…	0.299491	-2.41122	0.000437063	0.00153182	-0.314836	0.801699	0.881869	miR-124-3p/miR-320b/miR-4286/miR-550a-3p/miR-92a-3p	ENSG00000050393,ENSG00000102804,ENSG00000117586,ENSG00000185630,ENSG00000197959,ENSG00000198695,ENSG00000198948/ENSG00000185630,ENSG00000198948/ENSG00000198948/ENSG00000178033/ENSG00000050393	1.249/2.062/2.364/2.201/1.103	0.003/0.024/0.085/0.099/0.27	0.0315412518570877/0.132037805281633/0.273347219448612/0.273347219448612/0.593607674359989	-0.371078	0.00253874	-0.358311	0.00364693	-0.0766309	0.547274	0.83623	0.13868	0.50845	0.19917	0.53551	0	0	18	0	0	hsa05322 (Systemic lupus erythematosus)	P00052 (TGF-beta signaling pathway)	R-HSA-5617472 (Activation of anterior HOX genes in hindbrain development during early embryogenesis)	WP2291 (Deregulation of Rab and Rab Effector Genes in Bladder Cancer)	GO:0043270 (positive regulation of ion transport)
M:ME100	darkolivegreen	104	ENSG00000012660;ENSG00000025039;ENSG00000026103;ENSG00000027697;ENSG00000035681;ENSG00000059804;ENSG00000062716;ENSG00000065615;ENSG00000066027;ENSG00000067992;ENSG00000082996;ENSG00000100504;ENSG00000100554;ENSG00000101916;ENSG00000102580;ENSG00000103569;ENSG00000105767;ENSG00000105835;ENSG00000107341;ENSG00000108468;ENSG00000111052;ENSG00000111802;ENSG00000112096;ENSG00000112303;ENSG00000114480…	ELOVL5;RRAGD;FAS;IFNGR1;NSMAF;SLC2A3;VMP1;CYB5R4;PPP2R5A;PDK3;RNF13;PYGL;ATP6V1D;TLR8;DNAJC3;AQP9;CADM4;NAMPT;UBE2R2;CBX1;LIN7A;TDP2;SOD2;VNN2;GBE1;GCA;QPCT;IVNS1ABP;PHTF1;CD46;RSRP1;FBXL5;RHOQ;FAM45A;SRGN;TNFAIP6;NQO2;HNRNPH2;MBD4;OSER1;MKRN1;DSC2;NPL;TM6SF1;TLR4;FAM8A1;SDCBP;ENTPD1;EXOC6;CIR1;GPAT3;ANP32A;USP3;IGSF6;CMTM2;BCL10;RFWD2;FCGR2A;RIT1;MBOAT2;RALB;NRBF2;MPZL2;CTAGE5;CACUL1;HHEX;IFNGR2…	0.292873	1.928	0.000125329	0.00115248	-0.378349	0.0511312	0.160698	miR-124-3p/miR-181d-5p/miR-92a-3p/miR-550a-3p	ENSG00000025039,ENSG00000026103,ENSG00000027697,ENSG00000111052,ENSG00000112303,ENSG00000114480,ENSG00000115828,ENSG00000118564,ENSG00000132823,ENSG00000138678,ENSG00000140350,ENSG00000149573,ENSG00000150527,ENSG00000163171,ENSG00000165030,ENSG00000186205/ENSG00000025039,ENSG00000129071,ENSG00000138678,ENSG00000140350,ENSG00000163563/ENSG00000132823,ENSG00000143797/ENSG00000122862	1.874/2.734/1.594/2	0/0/0.056/0.12	1.30746912145072e-08/7.29022454765142e-05/0.206247222718457/0.330814583778575	0.351194	0.00443536	0.334446	0.00691121	0.037156	0.770677	0.19835	0.67853	0.33762	0.7367	0.38524	2	0	0	0	0	hsa05152 (Tuberculosis)	P00035 (Interferon-gamma signaling pathway)	R-HSA-6798695 (Neutrophil degranulation)	WP500 (Glycogen Synthesis and Degradation)	GO:0071496 (cellular response to external stimulus)
M:ME73	lightcyan1	82	ENSG00000011422;ENSG00000013364;ENSG00000013810;ENSG00000015285;ENSG00000015475;ENSG00000028137;ENSG00000034152;ENSG00000066136;ENSG00000066336;ENSG00000071127;ENSG00000071553;ENSG00000075624;ENSG00000076944;ENSG00000077150;ENSG00000077549;ENSG00000089060;ENSG00000100284;ENSG00000101460;ENSG00000102879;ENSG00000102882;ENSG00000103653;ENSG00000104915;ENSG00000105053;ENSG00000105355;ENSG00000105723…	PLAUR;MVP;TACC3;WAS;BID;TNFRSF1B;MAP2K3;NFYC;SPI1;WDR1;ATP6AP1;ACTB;STXBP2;NFKB2;CAPZB;SLC8B1;TOM1;MAP1LC3A;CORO1A;MAPK3;CSK;STX10;VRK3;PLIN3;GSK3A;C10orf54;SLC15A3;PTPN6;GNAI2;MAPKAPK3;CNPPD1;HS1BP3;ANXA11;ARMC7;GPR108;RTN2;TGM3;RAC2;LSP1;CHMP1A;INPP5K;WBP2;PRAM1;OS9;CCM2;CNPY3;YIPF3;FLOT1;PSTPIP1;TCF25;ARF1;CTDSP1;TNIP1;BIN3;DNAJB12;PPP4C;ATP6V0D1;ZYX;CALM3;G6PD;SHKBP1;SH2B2;SQSTM1;MTMR14;RPN1;…	0.289619	1.97862	0.000129971	0.00115248	-0.348987	0.294688	0.491147	miR-124-3p/miR-550a-3p/miR-4516/miR-23a-5p/miR-92a-3p/miR-320b	ENSG00000011422,ENSG00000071553,ENSG00000075624,ENSG00000102882,ENSG00000104915,ENSG00000105053,ENSG00000105355,ENSG00000111679,ENSG00000114353,ENSG00000137161,ENSG00000159720,ENSG00000160211,ENSG00000161011,ENSG00000163931,ENSG00000185000,ENSG00000214530/ENSG00000102882,ENSG00000185000/ENSG00000111679/ENSG00000161011/ENSG00000075624,ENSG00000148719/ENSG00000161011	2.111/2.93/4.134/3.441/1.832/1.404	0/0.004/0.015/0.03/0.037/0.207	3.20986109373741e-10/0.0246627071503997/0.0550965000121763/0.0807496194084003/0.0807496194084003/0.380267191398022	0.344655	0.00528866	0.324083	0.00898875	-0.108082	0.395264	0.16792	0.34705	0.47521	0.10512	0.56685	6	5	32	6	18	hsa05152 (Tuberculosis)	P00034 (Integrin signalling pathway)	R-HSA-76002 (Platelet activation, signaling and aggregation)	WP481 (Insulin Signaling)	GO:0007015 (actin filament organization)
M:ME84	brown	335	ENSG00000004059;ENSG00000005486;ENSG00000006712;ENSG00000007541;ENSG00000008438;ENSG00000011009;ENSG00000011600;ENSG00000023892;ENSG00000025708;ENSG00000040487;ENSG00000049089;ENSG00000051108;ENSG00000051128;ENSG00000051523;ENSG00000054611;ENSG00000060558;ENSG00000063322;ENSG00000068137;ENSG00000072818;ENSG00000073060;ENSG00000073169;ENSG00000075618;ENSG00000076924;ENSG00000077463;ENSG00000087077…	ARF5;RHBDD2;PAF1;PIGQ;PGLYRP1;LYPLA2;TYROBP;DEF6;TYMP;PQLC2;COL9A2;HERPUD1;HOMER3;CYBA;TBC1D22A;GNA15;MED29;PLEKHH3;ACAP1;SCARB1;SELO;FSCN1;XAB2;SIRT6;TRIP6;CDIP1;OCEL1;CIRBP;CDC34;GADD45B;DERL3;RNF215;GGA1;SH3BP1;TRIOBP;BIK;TSPO;SGSM3;NFKBIA;EMC9;PRPF6;MRGBP;GID8;C20orf27;ARFRP1;HM13;NKAP;WDR13;RENBP;DHRS12;ACD;PARD6A;UBE2I;HMOX2;PYCARD;STX4;CDIPT;BCKDK;GSDMD;NUCB1;NFKBIB;RELB;IL4I1;PTOV1;SGTA;T…	0.28581	1.85243	0.000107285	0.00115248	-0.397809	9.999e-05	0.00185092	miR-124-3p/miR-92a-3p	ENSG00000100106,ENSG00000100906,ENSG00000104805,ENSG00000150977,ENSG00000165233,ENSG00000169084,ENSG00000177706,ENSG00000183087,ENSG00000183688/ENSG00000177706	0.128/-0.269	0.332/0.713	1/1	0.210428	0.0951191	0.188673	0.135417	-0.0618512	0.627306	0.53873	0.66897	0.18315	0.53404	0.41508	8	0	3	0	1	hsa05169 (Epstein-Barr virus infection)	P02744 (Fructose galactose metabolism)	R-HSA-1236977 (Endosomal/Vacuolar pathway)	WP4217 (Ebola Virus Pathway on Host)	GO:0034340 (response to type I interferon)
M:ME44	cyan	143	ENSG00000021300;ENSG00000047634;ENSG00000057935;ENSG00000081059;ENSG00000089012;ENSG00000091409;ENSG00000092096;ENSG00000097096;ENSG00000099204;ENSG00000100003;ENSG00000100100;ENSG00000100316;ENSG00000101298;ENSG00000101842;ENSG00000103064;ENSG00000103351;ENSG00000105641;ENSG00000106624;ENSG00000111863;ENSG00000111879;ENSG00000112394;ENSG00000113319;ENSG00000114854;ENSG00000114861;ENSG00000115423…	PLEKHB1;SCML1;MTA3;TCF7;SIRPG;ITGA6;SLC22A17;SYDE2;ABLIM1;SEC14L2;PIK3IP1;RPL3;SNPH;VSIG1;SLC7A6;CLUAP1;SLC5A5;AEBP1;ADTRP;FAM184A;SLC16A10;RASGRF2;TNNC1;FOXP1;DNAH6;UXS1;AGMAT;CNN3;RCAN3;MAN1C1;KLHL29;EPHX2;UBIAD1;BCAS4;CCR7;BCL11B;MTUS1;SNX9;ATP8A2;C1QTNF6;TESPA1;EDAR;USP44;TBC1D4;LMO7;MYC;POLR1E;LEF1;CD27;MFGE8;CRTC3;CDR2;NKD1;GPA33;FBLN7;ANKRD31;EPHA1;CHMP7;TMEM25;FOXO1;NR3C2;BAG3;CAMK4;GRAP;…	0.277083	-2.26134	0.000593824	0.00153182	-0.407665	0.0002001	0.00185092	miR-92a-3p/miR-124-3p	ENSG00000120942/ENSG00000120942	0.583/-1.217	0.411/0.961	1/1	-0.220039	0.0806194	-0.197498	0.117748	0.14115	0.265912	0.27176	0.16395	0.19747	0.4035	0.23082	0	0	0	5	2	hsa04310 (Wnt signaling pathway)	P06959 (CCKR signaling map)	R-HSA-3000170 (Syndecan interactions)	WP399 (Wnt Signaling Pathway and Pluripotency)	GO:0042476 (odontogenesis)
M:ME25	brown2	55	ENSG00000036549;ENSG00000047230;ENSG00000049192;ENSG00000082898;ENSG00000085721;ENSG00000090470;ENSG00000092470;ENSG00000124459;ENSG00000126773;ENSG00000127995;ENSG00000131845;ENSG00000132286;ENSG00000132952;ENSG00000136866;ENSG00000137040;ENSG00000137760;ENSG00000138078;ENSG00000139173;ENSG00000142875;ENSG00000151413;ENSG00000152382;ENSG00000154511;ENSG00000160336;ENSG00000165121;ENSG00000166037…	ZZZ3;CTPS2;ADAMTS6;XPO1;RRN3;PDCD7;WDR76;ZNF45;PCNX4;CASD1;ZNF304;TIMM10B;USPL1;ZFP37;RANBP6;ALKBH8;PREPL;TMEM117;PRKACB;NUBPL;TADA1;FAM69A;ZNF761;RP11-213G2.3;CEP57;ZNF91;ZNF146;ZCCHC4;CA5B;USP47;PAQR8;ZNF131;ZNF571;PGBD4;ZFP1;XPOT;ZNF566;ZNF546;ZNF441;ZNF420;ZMYM1;ZNF682;ZNF675;ZNF461;ZNF347;ZBTB14;ZNF813;ZNF43;ZNF28;WDHD1;DCLRE1A;ZNF525;ZNF879;ZNF432;CTC-523E23.1	0.272084	-2.1663	0.000365097	0.00153182	0.320184	0.0900474	0.235838	miR-124-3p/miR-532-3p	ENSG00000082898,ENSG00000090470,ENSG00000139173,ENSG00000170915/ENSG00000082898	1.124/2.265	0.034/0.093	0.373659328976322/0.514243908965997	-0.383447	0.00176238	-0.364288	0.00308365	-0.0085415	0.946592	0.44777	0.95747	0.78863	0.33813	0.12726	0	0	0	0	0	hsa03013 (RNA transport)	P00022 (General transcription by RNA polymerase I)	R-HSA-163560 (Triglyceride catabolism)	WP3869 (Cannabinoid receptor signaling)	GO:0060976 (coronary vasculature development)
M:ME13	firebrick4	56	ENSG00000052802;ENSG00000069275;ENSG00000074266;ENSG00000074696;ENSG00000076554;ENSG00000088451;ENSG00000089335;ENSG00000100522;ENSG00000101557;ENSG00000108423;ENSG00000111875;ENSG00000112208;ENSG00000113456;ENSG00000117174;ENSG00000119965;ENSG00000121542;ENSG00000135249;ENSG00000137168;ENSG00000139291;ENSG00000140006;ENSG00000142065;ENSG00000151135;ENSG00000151611;ENSG00000154174;ENSG00000158417…	MSMO1;NUCKS1;EED;HACD3;TPD52;TGDS;ZNF302;GNPNAT1;USP14;TUBD1;ASF1A;BAG2;RAD1;ZNHIT6;C10orf88;SEC22A;RINT1;PPIL1;TMEM19;WDR89;ZFP14;TMEM263;MMAA;TOMM70;EIF5B;NOL9;PPM1K;TMEM41A;GRPEL2;ORC5;PHAX;ZNF22;MIS12;THAP2;GLMN;GIMAP7;IGIP;FANCF;LIN9;NSMCE3;AIDA;BCDIN3D;BLOC1S5;FAM3C;MAK16;TMEM57;PLPP6;TRIM59;NNT-AS1;RP11-156E6.1;LIX1L;RP11-53O19.3;RP11-140I16.3;RP11-251G23.5;RP11-513M16.8;CTC-523E23.3	0.258135	-2.09081	0.000367512	0.00153182	-0.352243	0.376445	0.55212	miR-124-3p/miR-320b/miR-92a-3p	ENSG00000117174,ENSG00000100522,ENSG00000154174,ENSG00000162408/ENSG00000117174/ENSG00000117174	1.106/1.786/1.52	0.036/0.147/0.187	0.39558698121419/0.685572515823304/0.685572515823304	-0.365872	0.00294794	-0.36312	0.00318723	0.104936	0.409245	0.52303	0.64177	0.33768	0.29399	0.70898	0	0	0	0	0	hsa00100 (Steroid biosynthesis)	NA (NA)	R-HSA-191273 (Cholesterol biosynthesis)	WP4271 (Vitamin B12 Disorders)	GO:0040029 (regulation of gene expression, epigenetic)
M:ME5	lightgreen	135	ENSG00000004766;ENSG00000013561;ENSG00000033178;ENSG00000034533;ENSG00000039123;ENSG00000055147;ENSG00000072415;ENSG00000075945;ENSG00000082213;ENSG00000086200;ENSG00000087053;ENSG00000087995;ENSG00000095261;ENSG00000096654;ENSG00000100335;ENSG00000102158;ENSG00000102401;ENSG00000103978;ENSG00000104442;ENSG00000105497;ENSG00000105708;ENSG00000107443;ENSG00000108094;ENSG00000108395;ENSG00000108671…	VPS50;RNF14;UBA6;ASTE1;SKIV2L2;FAM114A2;MPP5;KIFAP3;C5orf22;IPO11;MTMR2;METTL2A;PSMD5;ZNF184;MIEF1;MAGT1;ARMCX3;TMEM87A;ARMC1;ZNF175;ZNF14;CCNJ;CUL2;TRIM37;PSMD11;OSBP;RNGTT;SMAD5;UBE3A;ICMT;C1orf109;ALG2;SLF2;NUP43;ZFP30;ZNF644;METTL8;NCOA5;GPR18;ABCC4;ZNF227;NIP7;COG6;SUCLA2;ZNF189;PPP2R1B;DBT;RAP1GDS1;USO1;LNX2;MBNL2;ZNF614;RPL7L1;MFSD6;AP1S3;RNF219;CWF19L2;SLC30A6;SLC16A1;LSM11;RAB39B;PHF6;ZN…	0.252547	-2.31992	0.000581058	0.00153182	-0.360187	0.142382	0.348045	miR-181d-5p/miR-124-3p	ENSG00000087995/ENSG00000124160,ENSG00000175087,ENSG00000177613	0.863/-0.061	0.33/0.582	1/1	-0.351306	0.00442187	-0.350028	0.00457785	-0.0436535	0.731968	0.38383	0.38356	0.7162	0.64512	0.49482	0	0	0	0	0	hsa04120 (Ubiquitin mediated proteolysis)	P00060 (Ubiquitin proteasome pathway)	R-HSA-983168 (Antigen processing: Ubiquitination & Proteasome degradation)	WP3529 (Zinc homeostasis)	GO:0043687 (post-translational protein modification)
M:ME70	lightpink4	207	ENSG00000002834;ENSG00000005007;ENSG00000006327;ENSG00000007516;ENSG00000008516;ENSG00000010361;ENSG00000022567;ENSG00000066827;ENSG00000068024;ENSG00000068400;ENSG00000068976;ENSG00000070413;ENSG00000070444;ENSG00000072518;ENSG00000073150;ENSG00000076201;ENSG00000085644;ENSG00000087266;ENSG00000089505;ENSG00000090061;ENSG00000095370;ENSG00000099875;ENSG00000099995;ENSG00000100034;ENSG00000100605…	LASP1;UPF1;TNFRSF12A;BAIAP3;MMP25;FUZ;SLC45A4;ZFAT;HDAC4;GRIPAP1;PYGM;DGCR2;MNT;MARK2;PANX2;PTPN23;ZNF213;SH3BP2;CMTM1;CCNK;SH2D3C;MKNK2;SF3A1;PPM1F;ITPK1;MMP9;DNAJC5;MTG2;BMX;SLC35A2;MGRN1;ARHGEF18;MED25;DYRK1B;AKT2;PRKD2;CEACAM4;PLPPR2;ELL;ZNF574;AKNA;KRT23;TNFAIP1;ATG2A;NECTIN1;AMBRA1;TFEB;H2AFY;COL7A1;SCAP;ARID3A;AMPD2;TRIM62;MEF2D;ECE1;IRF2BPL;LTBP2;PTK2B;ADGRE5;ATP7B;PREX1;USP22;TBCC;FAM193…	0.252171	1.62445	0.000227273	0.00153182	-0.382089	9.999e-05	0.00185092	miR-124-3p	ENSG00000100985,ENSG00000113648,ENSG00000158825	-0.489	0.844	1	0.0998884	0.432263	0.0809523	0.524842	-0.218241	0.0831909	0.070557	0.21743	0.60506	0.97194	0.40148	0	0	0	0	0	hsa04915 (Estrogen signaling pathway)	P00004 (Alzheimer disease-presenilin pathway)	R-HSA-1592389 (Activation of Matrix Metalloproteinases)	WP4564 (Neural Crest Cell Migration during Development)	GO:0016569 (covalent chromatin modification)
M:ME64	darkslateblue	77	ENSG00000001630;ENSG00000008710;ENSG00000010322;ENSG00000011451;ENSG00000020129;ENSG00000059122;ENSG00000070047;ENSG00000074855;ENSG00000079313;ENSG00000080603;ENSG00000080854;ENSG00000088247;ENSG00000090975;ENSG00000099364;ENSG00000099814;ENSG00000100139;ENSG00000100241;ENSG00000100413;ENSG00000100425;ENSG00000101191;ENSG00000103326;ENSG00000103335;ENSG00000104885;ENSG00000105429;ENSG00000105738…	CYP51A1;PKD1;NISCH;WIZ;NCDN;FLYWCH1;PHRF1;ANO8;REXO1;SRCAP;IGSF9B;KHSRP;PITPNM2;FBXL19;CEP170B;MICALL1;SBF1;POLR3H;BRD1;DIDO1;CAPN15;PIEZO1;DOT1L;MEGF8;SIPA1L3;ABCA2;GIT1;RAI1;WFS1;OGG1;ADGRB2;MXD4;CPNE5;RREB1;PRR12;AHDC1;FAM78A;TUBGCP6;TRAF3;ACAP3;LLGL1;CLUH;CHST12;LRRC8A;FOXP4;DPP9;CARM1;ITPKB;DGKQ;MIGA2;ATP13A2;RAVER1;INTS1;KLHL26;LENG8;WDR81;HIC2;FASN;TAS1R3;FBXL14;HCFC1;PLEC;SCRIB;FAM83H;SGS…	0.231425	-1.83955	0.000422119	0.00153182	-0.399374	0.000802488	0.0052351	NA	NA	NA	NA	NA	-0.144817	0.253566	-0.142581	0.261046	-0.21452	0.088715	0.60265	0.21491	0.66844	0.63068	0.18245	0	0	0	0	0	hsa04070 (Phosphatidylinositol signaling system)	P00045 (Notch signaling pathway)	R-HSA-2426168 (Activation of gene expression by SREBF (SREBP))	WP4718 (Cholesterol metabolism (includes both Bloch and Kandutsch-Russell pathways))	GO:0099504 (synaptic vesicle cycle)
M:ME99	darkgreen	132	ENSG00000005175;ENSG00000055211;ENSG00000065135;ENSG00000070831;ENSG00000072849;ENSG00000077721;ENSG00000081320;ENSG00000083937;ENSG00000086061;ENSG00000086300;ENSG00000087253;ENSG00000087502;ENSG00000091140;ENSG00000091317;ENSG00000091527;ENSG00000092020;ENSG00000092199;ENSG00000093167;ENSG00000099246;ENSG00000100519;ENSG00000100664;ENSG00000100744;ENSG00000101084;ENSG00000101558;ENSG00000102524…	RPAP3;GINM1;GNAI3;CDC42;DERL2;UBE2A;STK17B;CHMP2B;DNAJA1;SNX10;LPCAT2;ERGIC2;DLD;CMTM6;CDV3;PPP2R3C;HNRNPC;LRRFIP2;RAB18;PSMC6;EIF5;GSKIP;C20orf24;VAPA;TNFSF13B;RAB11A;STK3;RAB2A;ASAH1;BNIP3L;TAX1BP1;CCNY;LAMTOR3;MANBA;UBE2D3;CLEC2B;PTP4A1;SNX3;PPP2CA;EIF1B;ACTR3;RTN4;COQ10B;CHMP3;RAP1A;CD58;RRAGC;CTBS;MFSD1;UBE2B;RAD23B;FAM206A;HSDL2;YPEL5;CRIPT;MXI1;WBP4;ETF1;SERP1;CXCL6;TM9SF2;RHOT1;EVI2A;FGL2…	0.230678	1.82394	0.000121065	0.00115248	-0.362145	0.100904	0.258126	miR-124-3p/miR-92a-3p/miR-1270	ENSG00000086061,ENSG00000086300,ENSG00000108100,ENSG00000115091,ENSG00000116815,ENSG00000119801,ENSG00000120705,ENSG00000126860,ENSG00000136560,ENSG00000139278,ENSG00000147533,ENSG00000153310,ENSG00000177917,ENSG00000182919,ENSG00000197223,ENSG00000198189/ENSG00000086061,ENSG00000119801,ENSG00000197771/ENSG00000197771	1.635/1.761/2.272	0/0.013/0.093	4.4047825259256e-07/0.0699443326279845/0.341179448216877	0.335099	0.00679571	0.328801	0.0079836	0.149266	0.239114	0.94714	0.72098	0.61631	0.99089	0.1275	0	0	1	0	3	hsa04144 (Endocytosis)	P00060 (Ubiquitin proteasome pathway)	R-HSA-6798695 (Neutrophil degranulation)	WP410 (Exercise-induced Circadian Regulation)	GO:0002446 (neutrophil mediated immunity)
M:ME106	blue	424	ENSG00000003402;ENSG00000003756;ENSG00000004660;ENSG00000007944;ENSG00000008083;ENSG00000010539;ENSG00000012232;ENSG00000017797;ENSG00000033327;ENSG00000033627;ENSG00000035664;ENSG00000036257;ENSG00000037637;ENSG00000054523;ENSG00000057704;ENSG00000058091;ENSG00000058866;ENSG00000059728;ENSG00000063978;ENSG00000064763;ENSG00000064999;ENSG00000068383;ENSG00000069943;ENSG00000070610;ENSG00000070614…	CFLAR;RBM5;CAMKK1;MYLIP;JARID2;ZNF200;EXTL3;RALBP1;GAB2;ATP6V0A1;DAPK2;CUL3;FBXO42;KIF1B;TMCC3;CDK14;DGKG;MXD1;RNF4;FAR2;ANKS1A;INPP5A;PIGB;GBA2;NDST1;ST6GALNAC2;TESK2;MAP4K4;CYBRD1;NDE1;MRVI1;PICALM;FOSL2;PLD1;ANKRD13A;NT5C2;NRDC;TP53INP2;PSEN1;PHLPP1;HAL;KIF3C;MAPRE3;BCORL1;B4GALT1;UIMC1;CASS4;RFX2;XRN2;BRAP;NLRP1;RPGRIP1;TOX4;VNN3;CDC5L;RSPH14;RAB36;MTMR3;CSF2RB;RBM23;SUSD6;RNF24;RASSF2;CDS2;S…	0.226583	1.87067	0.000104756	0.00115248	-0.361242	0.00309969	0.0154985	miR-124-3p/miR-320b	ENSG00000033627,ENSG00000070759,ENSG00000110934,ENSG00000115165,ENSG00000120709,ENSG00000128594,ENSG00000134769,ENSG00000163041,ENSG00000184014/ENSG00000134769	-0.107/-0.239	0.606/0.703	1/1	0.196046	0.120527	0.179445	0.155953	-0.133694	0.292246	0.30746	0.42421	0.68758	0.71944	0.70797	0	0	0	0	0	hsa05152 (Tuberculosis)	P00018 (EGF receptor signaling pathway)	R-HSA-6798695 (Neutrophil degranulation)	WP4223 (Ras Signaling)	GO:0002446 (neutrophil mediated immunity)
M:ME22	darkseagreen4	64	ENSG00000008277;ENSG00000008405;ENSG00000015171;ENSG00000064651;ENSG00000069667;ENSG00000075711;ENSG00000078403;ENSG00000080839;ENSG00000085788;ENSG00000089775;ENSG00000103037;ENSG00000104154;ENSG00000105926;ENSG00000107679;ENSG00000112365;ENSG00000115365;ENSG00000123124;ENSG00000127334;ENSG00000128915;ENSG00000131437;ENSG00000134709;ENSG00000138311;ENSG00000138380;ENSG00000138443;ENSG00000139737…	ADAM22;CRY1;ZMYND11;SLC12A2;RORA;DLG1;MLLT10;RBL1;DDHD2;ZBTB25;SETD6;SLC30A4;MPP6;PLEKHA1;ZBTB24;LANCL1;WWP1;DYRK2;ICE2;KIF3A;HOOK1;ZNF365;CARF;ABI2;SLAIN1;TBC1D32;GPR174;CD226;BICD1;JMY;HOMER1;DGKE;MSI2;TTC39B;RALGDS;DCAF16;EIF5A2;SFXN1;TC2N;CEP120;NIPA1;ZNF570;MALT1;RASGRP1;RALGAPA1;NR1D2;MTX3;GALNT11;PLAG1;GPRIN3;LYRM7;B3GLCT;ZNF33B;ZXDB;CEP290;FAM169A;CHIC1;SLFN12L;ZBTB10;SYNJ2BP;CCDC7;ZNF345…	0.215752	-2.10515	0.000387898	0.00153182	-0.328182	0.618971	0.773713	miR-532-3p/miR-124-3p	ENSG00000131437/ENSG00000064651,ENSG00000080839,ENSG00000131437	2.114/0.685	0.108/0.171	0.940313657755396/0.940313657755396	-0.31681	0.0107539	-0.302226	0.0152155	0.0721996	0.570746	0.33697	0.4531	0.84019	0.56364	0.85578	0	0	0	0	0	hsa04660 (T cell receptor signaling pathway)	P00041 (Metabotropic glutamate receptor group I pathway)	R-HSA-114508 (Effects of PIP2 hydrolysis)	WP3594 (Circadian rhythm related genes)	GO:0007200 (phospholipase C-activating G protein-coupled receptor signaling pathway)
M:ME23	lightcyan	139	ENSG00000001629;ENSG00000005100;ENSG00000012983;ENSG00000023516;ENSG00000030419;ENSG00000033867;ENSG00000047188;ENSG00000048405;ENSG00000056277;ENSG00000060339;ENSG00000066294;ENSG00000066654;ENSG00000073417;ENSG00000076321;ENSG00000076770;ENSG00000077097;ENSG00000078177;ENSG00000078674;ENSG00000081014;ENSG00000081148;ENSG00000087299;ENSG00000087448;ENSG00000089050;ENSG00000092439;ENSG00000093183…	ANKIB1;DHX33;MAP4K5;AKAP11;IKZF2;SLC4A7;YTHDC2;ZNF800;ZNF280C;CCAR1;CD84;THUMPD1;PDE8A;KLHL20;MBNL3;TOP2B;N4BP2;PCM1;AP4E1;IMPG2;L2HGDH;KLHL42;RBBP9;TRPM7;SEC22C;CDKL1;DDHD1;ARHGAP5;EEA1;KLF8;KATNAL1;CSPP1;CDK6;SP4;FKTN;SPIN1;ATE1;CCSER2;ANKRD26;INPP4B;WHSC1;SLC11A2;CEP85L;NCOA7;PHACTR2;HMGCS1;PDE4D;TTL;EHBP1;DCAF17;TRAK2;DOCK7;ESYT2;MREG;SLC16A7;WDR35;GTF3C3;PANK3;PDS5A;RECK;ATP8A1;THOC2;ATG14;K…	0.21248	-2.16453	0.00058651	0.00153182	-0.338708	0.41127	0.587529	miR-320b/miR-181d-5p/miR-124-3p	ENSG00000158691/ENSG00000179195/ENSG00000089050,ENSG00000104218,ENSG00000179195,ENSG00000213160	0.877/0.834/0.197	0.326/0.338/0.375	1/1/1	-0.25209	0.0444781	-0.226886	0.0714029	0.0416604	0.743777	0.81307	0.87337	0.26655	0.037621	0.67722	0	0	0	0	0	hsa05032 (Morphine addiction)	P00014 (Cholesterol biosynthesis)	R-HSA-3108232 (SUMO E3 ligases SUMOylate target proteins)	WP4534 (Mechanoregulation and pathology of YAP/TAZ via Hippo and non-Hippo mechanisms)	GO:0007059 (chromosome segregation)
M:ME75	plum	58	ENSG00000022277;ENSG00000058799;ENSG00000059377;ENSG00000060971;ENSG00000062282;ENSG00000075785;ENSG00000085117;ENSG00000085514;ENSG00000086730;ENSG00000088833;ENSG00000100296;ENSG00000100365;ENSG00000100938;ENSG00000101150;ENSG00000101336;ENSG00000101457;ENSG00000109103;ENSG00000114626;ENSG00000115590;ENSG00000115718;ENSG00000123405;ENSG00000132965;ENSG00000141096;ENSG00000141562;ENSG00000141968…	RTFDC1;YIPF1;TBXAS1;ACAA1;DGAT2;RAB7A;CD82;PILRA;LAT2;NSFL1C;THOC5;NCF4;GMPR2;TPD52L2;HCK;DNTTIP1;UNC119;ABTB1;IL1R2;PROC;NFE2;ALOX5AP;DPEP3;NARF;VAV1;TMEM91;SLC39A1;DYNLT1;C7orf43;MPPE1;EPHB1;DRC1;DEDD;PINK1;TMEM234;UBAP1;CCNDBP1;DPEP2;SLC16A5;CEACAM3;FPR1;NINJ2;HCLS1;CUEDC1;IFITM2;SIRT7;CASP4;SLC22A4;C5AR1;MSRB1;HSPA1A;LILRB3;LINC00694;RP5-1115A15.1;LILRA2;CCDC153;RP13-890H12.2;RP11-134L10.1	0.210109	1.86827	0.00027416	0.00153182	-0.331177	0.587423	0.751356	miR-124-3p/miR-320b/miR-92a-3p	ENSG00000101150,ENSG00000109103,ENSG00000141562,ENSG00000146425,ENSG00000198736/ENSG00000141562/ENSG00000060971	1.294/1.751/1.485	0.009/0.152/0.193	0.102528667210501/0.707568400885617/0.707568400885617	0.329201	0.00790302	0.303286	0.0148446	-0.0605587	0.634532	0.073857	0.26536	0.72152	0.80432	0.52151	0	0	4	0	1	hsa04380 (Osteoclast differentiation)	P00031 (Inflammation mediated by chemokine and cytokine signaling pathway)	R-HSA-2142753 (Arachidonic acid metabolism)	WP3937 (Microglia Pathogen Phagocytosis Pathway)	GO:0036230 (granulocyte activation)
M:ME62	turquoise	486	ENSG00000002330;ENSG00000002586;ENSG00000002822;ENSG00000004779;ENSG00000004975;ENSG00000005206;ENSG00000006015;ENSG00000006638;ENSG00000007080;ENSG00000007264;ENSG00000007376;ENSG00000007520;ENSG00000027847;ENSG00000033011;ENSG00000055950;ENSG00000058453;ENSG00000061936;ENSG00000062822;ENSG00000063176;ENSG00000063241;ENSG00000064545;ENSG00000064961;ENSG00000065054;ENSG00000065268;ENSG00000070423…	BAD;CD99;MAD1L1;NDUFAB1;DVL2;SPPL2B;C19orf60;TBXA2R;CCDC124;MATK;RPUSD1;TSR3;B4GALT7;ALG1;MRPL43;CROCC;SFSWAP;POLD1;SPHK2;ISOC2;TMEM161A;HMG20B;SLC9A3R2;WDR18;RNF126;TCF3;DAZAP1;MBD3;FAM3A;MRPS34;NOA1;GNA11;ARHGAP4;TFAP4;EFNB1;NUBP2;ACOT7;BCL7C;ATP5D;HNRNPM;NDUFB7;POLRMT;RASSF7;TBC1D10A;SLC25A1;GCAT;LMF2;RHBDD3;TELO2;TRADD;NME3;HCFC1R1;MPG;ZNF500;NARFL;HAGHL;FAM173A;METRN;MAZ;PYCRL;SNRNP70;LIN7B;…	0.206762	-1.43461	0.0027933	0.00548164	-0.378328	9.999e-05	0.00185092	NA	NA	NA	NA	NA	-0.0100482	0.937189	-0.0253298	0.842516	-0.0718006	0.572882	0.79094	0.95496	0.25781	0.3233	0.080845	5	0	8	2	5	hsa05012 (Parkinson disease)	P00041 (Metabotropic glutamate receptor group I pathway)	R-HSA-5389840 (Mitochondrial translation elongation)	WP623 (Oxidative phosphorylation)	GO:0010257 (NADH dehydrogenase complex assembly)
M:ME46	salmon1	28	ENSG00000065357;ENSG00000085465;ENSG00000100346;ENSG00000110844;ENSG00000111674;ENSG00000117090;ENSG00000130844;ENSG00000133131;ENSG00000140470;ENSG00000141576;ENSG00000148468;ENSG00000152465;ENSG00000153283;ENSG00000153896;ENSG00000154122;ENSG00000156804;ENSG00000169992;ENSG00000184205;ENSG00000184271;ENSG00000188321;ENSG00000198932;ENSG00000204282;ENSG00000204650;ENSG00000235194;ENSG00000257242…	DGKA;OVGP1;CACNA1I;PRPF40B;ENO2;SLAMF1;ZNF331;MORC4;ADAMTS17;RNF157;FAM171A1;NMT2;CD96;ZNF599;ANKH;FBXO32;NLGN2;TSPYL2;POU6F1;ZNF559;GPRASP1;TNRC6C-AS1;CRHR1-IT1;PPP1R3E;LINC01619;IPO5P1;LL0XNC01-7P3.1;XXbac-BPG283O16.9	0.205771	-1.87341	0.000590667	0.00153182	0.274808	0.951654	0.964053	miR-124-3p/miR-550a-3p	ENSG00000111674,ENSG00000130844,ENSG00000152465/ENSG00000152465	1.512/3.312	0.024/0.034	0.186124081329787/0.186124081329787	-0.337004	0.00646837	-0.317189	0.010655	0.0631066	0.62032	0.58384	0.53611	0.63668	0.85371	0.32796	0	0	0	0	0	hsa04927 (Cortisol synthesis and secretion)	NA (NA)	R-HSA-1187000 (Fertilization)	WP727 (Monoamine Transport)	GO:0008277 (regulation of G protein-coupled receptor signaling pathway)
M:ME107	paleturquoise	112	ENSG00000024862;ENSG00000040633;ENSG00000047644;ENSG00000060642;ENSG00000064547;ENSG00000068745;ENSG00000072786;ENSG00000076864;ENSG00000084070;ENSG00000089159;ENSG00000099308;ENSG00000100266;ENSG00000100307;ENSG00000100439;ENSG00000101363;ENSG00000103707;ENSG00000105339;ENSG00000108349;ENSG00000109220;ENSG00000110080;ENSG00000111732;ENSG00000113119;ENSG00000113749;ENSG00000114268;ENSG00000115507…	CCDC28A;PHF23;WWC3;PIGV;LPAR2;IP6K2;STK10;RAP1GAP;SMAP2;PXN;MAST3;PACSIN2;CBX7;ABHD4;MANBAL;MTFMT;DENND3;CASC3;CHIC2;ST3GAL4;AICDA;TMCO6;HRH2;PFKFB4;OTX1;ARHGEF2;ADPRHL2;CSF3R;MAD2L1BP;TNFSF14;STK35;STAT5A;FXR2;SLC44A2;TTI2;CHRNA10;RNF122;DPF2;MYBPC3;PHC2;CCNJL;ZC3H10;PPCDC;REM2;ITGAX;MOB3C;TUFT1;CERS2;FAM134A;CDC42EP2;PELO;BCL2L11;ZNF18;NAGS;MED11;KLHL21;INHBB;TNFAIP8L2;ARHGAP25;TMEM169;CXCR1;NU…	0.195444	1.47299	0.00913919	0.0143616	-0.415991	0.000200884	0.00185092	NA	NA	NA	NA	NA	0.101486	0.4249	0.064069	0.614987	-0.17829	0.158679	0.86037	0.42122	0.83353	0.65891	0.80975	0	0	0	0	0	hsa04213 (Longevity regulating pathway)	P00006 (Apoptosis signaling pathway)	R-HSA-1483257 (Phospholipid metabolism)	WP3932 (Focal Adhesion-PI3K-Akt-mTOR-signaling pathway)	GO:0050900 (leukocyte migration)
M:ME38	mediumorchid	60	ENSG00000073756;ENSG00000087074;ENSG00000099985;ENSG00000108691;ENSG00000112149;ENSG00000113070;ENSG00000118515;ENSG00000120738;ENSG00000121390;ENSG00000122026;ENSG00000122644;ENSG00000122877;ENSG00000123358;ENSG00000123689;ENSG00000125740;ENSG00000126861;ENSG00000128016;ENSG00000132002;ENSG00000136826;ENSG00000139318;ENSG00000140379;ENSG00000141682;ENSG00000144655;ENSG00000144802;ENSG00000153234…	PTGS2;PPP1R15A;OSM;CCL2;CD83;HBEGF;SGK1;EGR1;PSPC1;RPL21;ARL4A;EGR2;NR4A1;G0S2;FOSB;OMG;ZFP36;DNAJB1;KLF4;DUSP6;BCL2A1;PMAIP1;CSRNP1;NFKBIZ;NR4A2;FAM122C;BTG2;CXCL1;CXCL8;TRIB1;EIF1;PLK3;SFN;ZFAND2A;EGR3;MAFF;MIR22HG;UBE2FP1;LINC00852;AC003104.1;SNHG3;LINC01481;LINC00641;CTD-3247F14.2;RP11-1024P17.1;RP11-1094M14.11;MZF1-AS1;AC008982.2;LINC00936;RP11-345P4.9;RP11-434H6.6;RP11-59C5.3;Metazoa_SRP;RP…	0.193264	1.90644	0.000136203	0.00115248	-0.395129	0.0869754	0.233349	miR-124-3p	ENSG00000144802,ENSG00000179388,ENSG00000185022	0.75	0.149	1	0.194643	0.12326	0.220531	0.0799274	0.280749	0.0246319	0.72294	0.58811	0.32287	0.38703	0.14677	10	2	2	4	54	hsa05132 (Salmonella infection)	P00031 (Inflammation mediated by chemokine and cytokine signaling pathway)	R-HSA-6783783 (Interleukin-10 signaling)	WP2431 (Spinal Cord Injury)	GO:0060326 (cell chemotaxis)
M:ME80	black	209	ENSG00000007047;ENSG00000008128;ENSG00000011132;ENSG00000011243;ENSG00000011304;ENSG00000012171;ENSG00000012211;ENSG00000039650;ENSG00000040608;ENSG00000060069;ENSG00000060491;ENSG00000063169;ENSG00000063245;ENSG00000064601;ENSG00000067606;ENSG00000068831;ENSG00000071051;ENSG00000072310;ENSG00000077454;ENSG00000078061;ENSG00000079435;ENSG00000083838;ENSG00000086506;ENSG00000090661;ENSG00000092758…	MARK4;CDK11A;APBA3;AKAP8L;PTBP1;SEMA3B;PRICKLE3;PNKP;RTN4R;CTDP1;OGFR;GLTSCR1;EPN1;CTSA;PRKCZ;RASGRP2;NCK2;SREBF1;LRCH4;ARAF;LIPE;ZNF446;HBQ1;CERS4;COL9A3;CRAT;MZF1;MARCH2;KLHL22;GGT1;MFNG;PICK1;PPP6R2;CYB5R3;TTLL12;HDAC10;ARFGAP1;CLCN7;RHBDL1;LYL1;TBC1D17;CCDC130;SCN1B;BRAT1;EPHB6;SNX8;CLDN15;CLIP2;NPDC1;RECQL5;CYTH1;SLC9A3R1;EHD1;TCIRG1;CCND3;SRF;FBRSL1;DBN1;MORN1;WRAP73;DLGAP3;ID3;ZBTB45;SH3TC…	0.187311	1.41511	0.00806635	0.0130485	-0.392065	0.0002	0.00185092	miR-532-3p/miR-124-3p	ENSG00000204344/ENSG00000011243	0.93/-1.597	0.313/0.991	1/1	0.117263	0.35611	0.101708	0.423884	-0.136164	0.283339	0.82645	0.71749	0.77155	0.70071	0.24009	0	0	0	0	0	hsa04012 (ErbB signaling pathway)	P00054 (Toll receptor signaling pathway)	R-HSA-1810476 (RIP-mediated NFkB activation via ZBP1)	WP53 (ID signaling pathway)	GO:0016049 (cell growth)
M:ME1	lightyellow	134	ENSG00000002587;ENSG00000002745;ENSG00000003249;ENSG00000005471;ENSG00000007312;ENSG00000012124;ENSG00000035720;ENSG00000042980;ENSG00000065923;ENSG00000066923;ENSG00000074219;ENSG00000075340;ENSG00000082293;ENSG00000082438;ENSG00000083454;ENSG00000091490;ENSG00000091972;ENSG00000095585;ENSG00000099953;ENSG00000100721;ENSG00000101017;ENSG00000103365;ENSG00000103647;ENSG00000104432;ENSG00000104921…	HS3ST1;WNT16;DBNDD1;ABCB4;CD79B;CD22;STAP1;ADAM28;SLC9A7;STAG3;TEAD2;ADD2;COL19A1;COBLL1;P2RX5;SEL1L3;CD200;BLNK;MMP11;TCL1A;CD40;GGA2;CORO2B;IL7;FCER2;CD79A;TSPAN13;POU2AF1;BCL7A;KHDRBS2;SOBP;RALGPS2;CR2;BCL11A;MOB3B;PLEKHG1;PMEPA1;VPREB3;QRSL1;FCRLA;FCRL2;LARGE1;E2F5;SWAP70;CHL1;DTX1;NT5E;RAPGEF5;BLK;CD72;RAB30;PRICKLE1;TSPAN3;FCRL5;AFF3;OSBPL10;N4BP3;ZNF711;PLPP5;FBXO10;GPM6A;RASGRP3;PTPRK;BAN…	0.184324	-2.17843	0.00057971	0.00153182	-0.31818	0.820757	0.88513	NA	NA	NA	NA	NA	-0.189719	0.133222	-0.176785	0.162281	-0.144894	0.253311	0.42253	0.20858	0.53133	0.14707	0.42065	9	1	2	1	5	hsa04662 (B cell receptor signaling pathway)	P00010 (B cell activation)	R-HSA-983695 (Antigen activates B Cell Receptor (BCR) leading to generation of second messengers)	WP23 (B Cell Receptor Signaling Pathway)	GO:0042113 (B cell activation)
M:ME88	skyblue4	43	ENSG00000001036;ENSG00000026025;ENSG00000044459;ENSG00000065485;ENSG00000073969;ENSG00000092964;ENSG00000101310;ENSG00000102393;ENSG00000106066;ENSG00000108861;ENSG00000110077;ENSG00000111144;ENSG00000111275;ENSG00000112367;ENSG00000112799;ENSG00000114013;ENSG00000115129;ENSG00000115919;ENSG00000116990;ENSG00000121064;ENSG00000125149;ENSG00000131981;ENSG00000132669;ENSG00000134802;ENSG00000135046…	FUCA2;VIM;CNTLN;PDIA5;NSF;DPYSL2;SEC23B;GLA;CPVL;DUSP3;MS4A6A;LTA4H;ALDH2;FIG4;LY86;CD86;TP53I3;KYNU;MYCL;SCPEP1;C16orf70;LGALS3;RIN2;SLC43A3;ANXA1;EIF4E2;KCTD3;EPHX1;FAM105A;DIAPH2;C10orf11;HNMT;PID1;CACNA2D3;CD1D;PEA15;ANXA5;FOLR2;CRTAP;COQ2;AP003774.4;STAC3;RP11-568K15.1	0.180631	1.66587	0.00298932	0.00566941	-0.296775	0.922236	0.948093	miR-124-3p/miR-550a-3p/miR-320b/miR-92a-3p	ENSG00000026025,ENSG00000112367,ENSG00000115129,ENSG00000131981,ENSG00000145569/ENSG00000026025/ENSG00000026025/ENSG00000026025	1.594/2.883/2.05/1.784	0.003/0.052/0.115/0.147	0.0282339861517224/0.283356054308011/0.403971590251421/0.403971590251421	0.339869	0.00600199	0.343355	0.00547467	0.0620435	0.626233	0.66481	0.87922	0.98423	0.37095	0.90603	0	0	0	0	0	hsa00340 (Histidine metabolism)	P05734 (Synaptic vesicle trafficking)	R-HSA-6788656 (Histidine, lysine, phenylalanine, tyrosine, proline and tryptophan catabolism)	WP2431 (Spinal Cord Injury)	GO:1990778 (protein localization to cell periphery)
M:ME76	plum2	77	ENSG00000012061;ENSG00000014138;ENSG00000019582;ENSG00000055070;ENSG00000058262;ENSG00000067225;ENSG00000072135;ENSG00000074800;ENSG00000081791;ENSG00000087111;ENSG00000088682;ENSG00000099956;ENSG00000100280;ENSG00000100297;ENSG00000100325;ENSG00000100412;ENSG00000100889;ENSG00000100949;ENSG00000102900;ENSG00000103043;ENSG00000104129;ENSG00000104299;ENSG00000105220;ENSG00000105281;ENSG00000105341…	ERCC1;POLA2;CD74;SZRD1;SEC61A1;PKM;PTPN18;ENO1;KIAA0141;PIGS;COQ9;SMARCB1;AP1B1;MCM5;ASCC2;ACO2;PCK2;RABGGTA;NUP93;VAC14;DNAJC17;INTS9;GPI;SLC1A5;ATP5SL;ARMC6;SMG9;PLOD3;EIF4H;HPS1;NAGLU;ABI3;VAT1;NAT9;DCPS;CCDC86;MVK;DHDDS;PTPA;DENND1A;TMEM39B;PIGT;AAMP;LRRC41;CALHM2;RRNAD1;PI4KB;STK11IP;GMPPA;OXA1L;UBXN11;CSRP1;SHC1;TEX264;POLL;SLC27A4;PSMD2;MAN1B1;RIC8A;SHMT2;FBXL6;EXOC7;DDX41;MCRS1;C19orf54;H…	0.179512	1.54459	0.00615747	0.0105832	-0.411368	0.000809061	0.0052351	miR-23a-5p/miR-532-3p/miR-92a-3p/miR-124-3p	ENSG00000074800/ENSG00000160691/ENSG00000074800/ENSG00000160691	3.504/1.929/1.202/-0.598	0.028/0.128/0.248/0.824	0.30835387713655/0.706663961980098/0.908727552849269/1	0.224881	0.0740101	0.220115	0.0805124	-0.0856105	0.501188	0.44315	0.33357	0.85087	0.7295	0.50182	29	1	6	5	1	hsa05310 (Asthma)	P00024 (Glycolysis)	R-HSA-202430 (Translocation of ZAP-70 to Immunological synapse)	WP4290 (Metabolic reprogramming in colon cancer)	GO:0019882 (antigen processing and presentation)
M:ME33	antiquewhite4	63	ENSG00000001461;ENSG00000010803;ENSG00000012817;ENSG00000056558;ENSG00000100099;ENSG00000103044;ENSG00000103091;ENSG00000106479;ENSG00000108375;ENSG00000109063;ENSG00000115306;ENSG00000121057;ENSG00000124181;ENSG00000129351;ENSG00000130038;ENSG00000133030;ENSG00000135749;ENSG00000136068;ENSG00000140948;ENSG00000143515;ENSG00000144749;ENSG00000146021;ENSG00000147324;ENSG00000151240;ENSG00000162415…	NIPAL3;SCMH1;KDM5D;TRAF1;HPS4;HAS3;WDR59;ZNF862;RNF43;MYH3;SPTBN1;AKAP1;PLCG1;ILF3;CRACR2A;MPRIP;PCNX2;FLNB;ZCCHC14;ATP8B2;LRIG1;KLHL3;MFHAS1;DIP2C;ZSWIM5;FBXO41;TRIM46;WNT10B;CHD3;ASXL1;ANKRD36C;KCNA3;KCNA2;CTC1;DNHD1;HKR1;C22orf46;ZBTB40;SP140L;L3MBTL1;ZNF749;TRMT2B;PLEKHG4;TMEM63A;ARMCX4;ZSCAN25;SYNGAP1;ZNF783;DNASE1;AFG3L1P;COX10-AS1;RP11-902B17.1;TMPRSS4-AS1;TOMM20P2;MMP25-AS1;NBPF15;RP11-68…	0.178915	-1.93618	0.000385356	0.00153182	-0.356404	0.196365	0.400004	miR-181d-5p/miR-92a-3p/miR-124-3p	ENSG00000140948,ENSG00000143515/ENSG00000140948/ENSG00000143515,ENSG00000188917	2.319/1.402/0.295	0.015/0.208/0.411	0.162922692719007/1/1	-0.27301	0.029059	-0.255665	0.041447	-0.0364062	0.775182	0.88042	0.3143	0.72459	0.53618	0.64617	0	0	0	0	0	hsa05205 (Proteoglycans in cancer)	P00044 (Nicotinic acetylcholine receptor signaling pathway)	R-HSA-1296072 (Voltage gated Potassium channels)	WP2018 (RANKL/RANK (Receptor activator of NFKB (ligand)) Signaling Pathway)	GO:0072089 (stem cell proliferation)
M:ME74	darkolivegreen4	55	ENSG00000000938;ENSG00000005238;ENSG00000008130;ENSG00000012779;ENSG00000018280;ENSG00000022840;ENSG00000065882;ENSG00000067182;ENSG00000068323;ENSG00000072062;ENSG00000072110;ENSG00000074660;ENSG00000083444;ENSG00000090020;ENSG00000092036;ENSG00000100055;ENSG00000101474;ENSG00000105501;ENSG00000110876;ENSG00000111321;ENSG00000111424;ENSG00000111737;ENSG00000116688;ENSG00000117676;ENSG00000120306…	FGR;FAM214B;NADK;ALOX5;SLC11A1;RNF10;TBC1D1;TNFRSF1A;TFE3;PRKACA;ACTN1;SCARF1;PLOD1;SLC9A1;HAUS4;CYTH4;APMAP;SIGLEC5;SELPLG;LTBR;VDR;RAB35;MFN2;RPS6KA1;CYSTM1;TSHZ3;FKBP9;THEMIS2;FLOT2;CASP9;DYSF;ACTR1A;DEF8;PPP1R18;ITPRIP;ZFAND3;ETS2;NCF1;MPZ;NCF1C;ANPEP;LRG1;CANT1;RASGRP4;MOB3A;SH3BP5L;APOBR;ARHGAP30;SEMA4A;LTB4R;LINC01272;NFAM1;PLEKHO2;NOL12;NATD1	0.177439	1.76237	0.000275368	0.00153182	-0.357162	0.252187	0.475675	miR-124-3p/miR-4286/miR-532-3p	ENSG00000101474,ENSG00000120306,ENSG00000157557,ENSG00000148841/ENSG00000157557/ENSG00000072110	1.124/2.799/2.265	0.034/0.056/0.093	0.307446916071579/0.307446916071579/0.342829272643998	0.284674	0.0226134	0.264019	0.0350233	-0.134202	0.290398	0.44368	0.37388	0.68362	0.62395	0.10672	0	0	1	0	2	hsa04913 (Ovarian steroidogenesis)	P00028 (Heterotrimeric G-protein signaling pathway-rod outer segment phototransduction)	R-HSA-6798695 (Neutrophil degranulation)	WP384 (Apoptosis Modulation by HSP70)	GO:0002446 (neutrophil mediated immunity)
M:ME32	lavenderblush2	47	ENSG00000005156;ENSG00000006125;ENSG00000010292;ENSG00000011376;ENSG00000013523;ENSG00000047849;ENSG00000070366;ENSG00000075856;ENSG00000084652;ENSG00000084774;ENSG00000087269;ENSG00000089154;ENSG00000089597;ENSG00000095319;ENSG00000103932;ENSG00000106608;ENSG00000110514;ENSG00000111602;ENSG00000115806;ENSG00000120685;ENSG00000127463;ENSG00000133422;ENSG00000135372;ENSG00000137073;ENSG00000137337…	LIG3;AP2B1;NCAPD2;LARS2;ANGEL1;MAP4;SMG6;SART3;TXLNA;CAD;NOP14;GCN1;GANAB;NUP188;RPAP1;URGCP;MADD;TIMELESS;GORASP2;PROSER1;EMC1;MORC2;NAT10;UBAP2;MDC1;IFT172;ESYT1;FTO;MBTPS1;RANBP10;ZMYM3;POLR3A;PDCD11;HYOU1;NCAPD3;MCM3AP;UBQLN4;ATP1A1;DDB1;EDC3;GEMIN4;TDRKH;SF3B3;NOP9;HTT;SPTAN1;IPO9	0.171763	-1.85823	0.00138744	0.00289749	-0.365441	0.148862	0.355975	miR-124-3p	ENSG00000135372	-0.105	0.654	1	-0.302074	0.0152694	-0.293687	0.0185034	-0.128083	0.313152	0.78183	0.2229	0.81912	0.25056	0.099946	0	0	0	0	0	hsa04141 (Protein processing in endoplasmic reticulum)	P00029 (Huntington disease)	R-HSA-6790901 (rRNA modification in the nucleus and cytosol)	WP3925 (Amino Acid metabolism)	GO:0022613 (ribonucleoprotein complex biogenesis)
M:ME93	darkmagenta	103	ENSG00000010319;ENSG00000011590;ENSG00000048462;ENSG00000073282;ENSG00000100629;ENSG00000132465;ENSG00000133328;ENSG00000136457;ENSG00000137265;ENSG00000150967;ENSG00000170476;ENSG00000176658;ENSG00000178445;ENSG00000183508;ENSG00000197888;ENSG00000211592;ENSG00000211593;ENSG00000211594;ENSG00000211595;ENSG00000211597;ENSG00000211598;ENSG00000211599;ENSG00000211611;ENSG00000211625;ENSG00000211637…	SEMA3G;ZBTB32;TNFRSF17;TP63;CEP128;JCHAIN;HRASLS2;CHAD;IRF4;ABCB9;MZB1;MYO1D;GLDC;FAM46C;UGT2B17;IGKC;IGKJ5;IGKJ4;IGKJ3;IGKJ1;IGKV4-1;IGKV5-2;IGKV6-21;IGKV3D-20;IGLV4-69;IGLV8-61;IGLV6-57;IGLV10-54;IGLV1-51;IGLV1-47;IGLV7-46;IGLV5-45;IGLV1-44;IGLV7-43;IGLV1-40;IGLV3-25;IGLV2-23;IGLV3-21;IGLV3-19;IGLV2-18;IGLV2-14;IGLV2-11;IGLV3-10;IGLV3-9;IGLV3-1;IGLC2;IGLC3;IGLC7;IGHA2;IGHG4;IGHG2;IGHA1;IGHG1;IG…	0.1646	-2.086	0.000490196	0.00153182	0.319712	0.341352	0.518484	NA	NA	NA	NA	NA	-0.108376	0.393974	-0.112984	0.374051	-0.0398283	0.754683	0.78615	0.80577	0.031413	0.68785	0.71919	1	0	0	0	0	hsa04672 (Intestinal immune network for IgA production)	P04397 (p53 pathway by glucose deprivation)	R-HSA-5669034 (TNFs bind their physiological receptors)	WP254 (Apoptosis)	GO:0002250 (adaptive immune response)
M:ME83	lightslateblue	34	ENSG00000004142;ENSG00000068120;ENSG00000068903;ENSG00000087460;ENSG00000088298;ENSG00000092330;ENSG00000099203;ENSG00000099817;ENSG00000101473;ENSG00000106636;ENSG00000108528;ENSG00000108639;ENSG00000112977;ENSG00000123416;ENSG00000125818;ENSG00000126247;ENSG00000138073;ENSG00000138629;ENSG00000142669;ENSG00000145022;ENSG00000146556;ENSG00000148248;ENSG00000161203;ENSG00000167770;ENSG00000170043…	POLDIP2;COASY;SIRT2;GNAS;EDEM2;TINF2;TMED1;POLR2E;ACOT8;YKT6;SLC25A11;SYNGR2;DAP;TUBA1B;PSMF1;CAPNS1;PREB;UBL7;SH3BGRL3;TCTA;WASH2P;SURF4;AP2M1;OTUB1;TRAPPC1;TADA3;PPP1CA;CFL1;KAT5;DCTN2;ACTG1;TMEM222;ASNA1;E2F4	0.16398	1.64231	0.00425407	0.00767128	-0.378315	0.162492	0.363324	miR-532-3p/miR-181d-5p/miR-124-3p	ENSG00000167770/ENSG00000172757/ENSG00000145022,ENSG00000198356	2.746/2.242/0.912	0.059/0.096/0.175	0.52555342560737/0.52555342560737/0.641575277799091	0.337241	0.00642847	0.317994	0.0104476	-0.0805579	0.52687	0.59221	0.51051	0.29943	0.52725	0.31822	0	0	8	1	0	hsa04611 (Platelet activation)	P00016 (Cytoskeletal regulation by Rho GTPase)	R-HSA-190828 (Gap junction trafficking)	WP2636 (Common Pathways Underlying Drug Addiction)	GO:0032527 (protein exit from endoplasmic reticulum)
M:ME51	indianred4	56	ENSG00000005059;ENSG00000055044;ENSG00000064995;ENSG00000067334;ENSG00000071994;ENSG00000100380;ENSG00000100442;ENSG00000100749;ENSG00000101132;ENSG00000102738;ENSG00000105821;ENSG00000106049;ENSG00000106355;ENSG00000107020;ENSG00000111196;ENSG00000111832;ENSG00000113460;ENSG00000115541;ENSG00000117899;ENSG00000118418;ENSG00000123472;ENSG00000123545;ENSG00000124596;ENSG00000124767;ENSG00000126524…	MCUB;NOP58;TAF11;DNTTIP2;PDCD2;ST13;FKBP3;VRK1;PFDN4;MRPS31;DNAJC2;HIBADH;LSM5;PLGRKT;MAGOHB;RWDD1;BRIX1;HSPE1;MESDC2;HMGN3;ATPAF1;NDUFAF4;OARD1;GLO1;SBDS;COQ3;RIDA;LTV1;RNASEH2B;MRPL47;XPA;THUMPD2;ZCRB1;PRPSAP2;ACP1;RPS3A;POLR2K;RPP30;CWC27;RWDD2B;GPATCH4;RPL22L1;AIMP1;ANAPC10;MOCS2;KLHDC2;ANAPC16;SNRPD1;MRPL1;NUDT9;CHCHD7;HSPA14;OSTC;RP11-452F19.3;FLJ27354;RDH14	0.159671	NA	NA	NA	-0.445095	0.00116501	0.00709784	NA	NA	NA	NA	NA	0.0406243	0.749938	0.0516804	0.685062	0.273306	0.0288782	0.25715	0.57954	0.57866	0.22255	0.85956	0	0	0	0	1	hsa03008 (Ribosome biogenesis in eukaryotes)	P00022 (General transcription by RNA polymerase I)	R-HSA-72172 (mRNA Splicing)	WP4705 (Pathways of nucleic acid metabolism and innate immune sensing)	GO:0006457 (protein folding)
M:ME39	skyblue2	59	ENSG00000009790;ENSG00000010244;ENSG00000083750;ENSG00000089022;ENSG00000100650;ENSG00000100941;ENSG00000106591;ENSG00000108654;ENSG00000108848;ENSG00000116560;ENSG00000119760;ENSG00000127980;ENSG00000129197;ENSG00000129484;ENSG00000131368;ENSG00000131876;ENSG00000132300;ENSG00000132424;ENSG00000133624;ENSG00000134884;ENSG00000134900;ENSG00000137955;ENSG00000143499;ENSG00000152582;ENSG00000152795…	TRAF3IP3;ZNF207;RRAGB;MAPKAPK5;SRSF5;PNN;MRPL32;DDX5;LUC7L3;SFPQ;SUPT7L;PEX1;RPAIN;PARP2;MRPS25;SNRPA1;PTCD3;PNISR;ZNF767P;ARGLU1;TPP2;RABGGTB;SMYD2;SPEF2;HNRNPDL;SRSF2;ANKZF1;CCNL1;TTC14;ANKRA2;METTL17;METTL3;COX11;RIMKLB;ZNF226;TOMM5;NDUFV2;UBE2G2;GIMAP5;NOL8;DDX47;AC024560.3;SEPT7P2;DNAJC9-AS1;HCG18;AC062029.1;AC006978.6;RPL36A;BMS1P4;N4BP2L2;RAD51-AS1;TMEM161B-AS1;RRN3P1;RP11-420A23.1;RP11-66…	0.157296	1.63421	0.0031348	0.00584454	-0.349622	0.402503	0.58257	miR-550a-3p/miR-4286/miR-320b/miR-181d-5p/miR-92a-3p/miR-124-3p	ENSG00000100941,ENSG00000132424/ENSG00000010244/ENSG00000100941/ENSG00000132424/ENSG00000132424/ENSG00000100941,ENSG00000132424	3.26/2.729/1.734/1.691/1.468/0.361	0.002/0.06/0.154/0.16/0.196/0.38	0.0258458073601449/0.329163696184484/0.431103850879332/0.431103850879332/0.431103850879332/0.6963441108105	0.19347	0.125579	0.208358	0.0984936	0.291273	0.0195361	0.47475	0.5428	0.7496	0.1611	0.29565	0	0	0	1	2	hsa03040 (Spliceosome)	P00020 (FAS signaling pathway)	R-HSA-72203 (Processing of Capped Intron-Containing Pre-mRNA)	WP411 (mRNA Processing)	GO:0008380 (RNA splicing)
M:ME42	palevioletred3	71	ENSG00000005448;ENSG00000013725;ENSG00000034053;ENSG00000063180;ENSG00000065675;ENSG00000088543;ENSG00000096384;ENSG00000101464;ENSG00000103423;ENSG00000107829;ENSG00000108515;ENSG00000110448;ENSG00000120158;ENSG00000120910;ENSG00000122224;ENSG00000125354;ENSG00000133321;ENSG00000135632;ENSG00000136950;ENSG00000138363;ENSG00000138796;ENSG00000139266;ENSG00000141293;ENSG00000144199;ENSG00000144659…	WDR54;CD6;APBA2;CA11;PRKCQ;C3orf18;HSP90AB1;PIGU;DNAJA3;FBXW4;ENO3;CD5;RCL1;PPP3CC;LY9;sept.6;RARRES3;SMYD5;ARPC5L;ATIC;HADH;MARCH9;SKAP1;FAHD2B;SLC25A38;PRPS1;HIRIP3;DCP1B;PITPNC1;GOLGA7B;SFXN2;UBASH3A;BDH1;FCMR;MAD2L1;ANKS6;CNPY4;MEI1;CD3D;RHOH;HARS;C10orf35;MPI;AEN;PJA1;LCK;NIPSNAP1;MATN1-AS1;CD3E;CCDC85C;RP11-706O15.1;TRBV6-5;TRBC1;TRBJ2-7;TRBC2;TRAV4;TRAV13-2;LBH;SBDSP1;HAR1A;AC109826.1;AC01…	0.156046	-2.00003	0.00040404	0.00153182	-0.383052	0.0840292	0.23108	miR-124-3p	ENSG00000213626	-0.517	0.799	1	-0.259532	0.0383618	-0.245712	0.0503393	0.0559225	0.660729	0.35031	0.83903	0.078018	0.43861	0.72053	4	1	6	2	4	hsa04659 (Th17 cell differentiation)	P00053 (T cell activation)	R-HSA-202430 (Translocation of ZAP-70 to Immunological synapse)	WP69 (T-Cell antigen Receptor (TCR) Signaling Pathway)	GO:0042110 (T cell activation)
M:ME27	indianred3	32	ENSG00000059573;ENSG00000090861;ENSG00000100395;ENSG00000101452;ENSG00000101811;ENSG00000108592;ENSG00000110107;ENSG00000111801;ENSG00000112118;ENSG00000115053;ENSG00000118894;ENSG00000119403;ENSG00000125166;ENSG00000125746;ENSG00000132383;ENSG00000132591;ENSG00000134684;ENSG00000136861;ENSG00000137310;ENSG00000138375;ENSG00000139626;ENSG00000143374;ENSG00000143799;ENSG00000149136;ENSG00000149480…	ALDH18A1;AARS;L3MBTL2;DHX35;CSTF2;FTSJ3;PRPF19;BTN3A3;MCM3;NCL;EEF2KMT;PHF19;GOT2;EML2;RPA1;ERAL1;YARS;CDK5RAP2;TCF19;SMARCAL1;ITGB7;TARS2;PARP1;SSRP1;MTA2;MCM7;SRP68;COG7;MAGED1;MRPS18B;ABCF1;FANCG	0.155923	-1.62235	0.0170888	0.0254023	-0.406207	0.0612088	0.185811	NA	NA	NA	NA	NA	-0.246459	0.0496219	-0.242464	0.0535577	-0.0731632	0.565602	0.64904	0.81595	0.041759	0.041491	0.62988	2	0	0	2	0	hsa03030 (DNA replication)	P00020 (FAS signaling pathway)	R-HSA-68962 (Activation of the pre-replicative complex)	WP2446 (Retinoblastoma Gene in Cancer)	GO:0006520 (cellular amino acid metabolic process)
M:ME57	yellow4	59	ENSG00000064490;ENSG00000065978;ENSG00000084623;ENSG00000087884;ENSG00000089327;ENSG00000096080;ENSG00000100348;ENSG00000100417;ENSG00000102103;ENSG00000105379;ENSG00000105583;ENSG00000106268;ENSG00000107874;ENSG00000110200;ENSG00000111653;ENSG00000114388;ENSG00000115211;ENSG00000115661;ENSG00000117305;ENSG00000119929;ENSG00000124733;ENSG00000125991;ENSG00000126088;ENSG00000131143;ENSG00000131475…	RFXANK;YBX1;EIF3I;AAMDC;FXYD5;MRPS18A;TXN2;PMM1;PQBP1;ETFB;WDR83OS;NUDT1;CUEDC2;ANAPC15;ING4;NPRL2;EIF2B4;STK16;HMGCL;CUTC;MEA1;ERGIC3;UROD;COX4I1;VPS25;VIMP;VPS4A;TIMM10;ATP5G2;PSMB7;C12orf10;SAT2;PSMB6;PSMA5;INO80C;BRE;SNF8;PSMB4;SSR2;SUCLG1;POC1A;PPIB;POLR2G;COPS6;TMEM208;SF3B5;EXOSC1;HDAC3;COMMD1;PARL;SWI5;EIF3K;ALYREF;CSNK2B;LCMT1;FIS1;ISY1;TMEM141;Y_RNA	0.152819	1.69653	0.00122666	0.00269865	-0.362639	0.268763	0.475675	miR-124-3p	ENSG00000107874,ENSG00000131475,ENSG00000204435	0.766	0.144	1	0.286066	0.021932	0.268488	0.0319429	0.0785057	0.537485	0.50033	0.55901	0.36152	0.89891	0.85277	1	0	123	1	1	hsa03050 (Proteasome)	P00049 (Parkinson disease)	R-HSA-174084 (Autodegradation of Cdh1 by Cdh1:APC/C)	WP183 (Proteasome Degradation)	GO:0043687 (post-translational protein modification)
M:ME50	sienna4	43	ENSG00000009844;ENSG00000016864;ENSG00000023608;ENSG00000028839;ENSG00000058729;ENSG00000086598;ENSG00000092108;ENSG00000101843;ENSG00000102805;ENSG00000106588;ENSG00000114209;ENSG00000115514;ENSG00000115947;ENSG00000117697;ENSG00000121022;ENSG00000122033;ENSG00000123297;ENSG00000127125;ENSG00000129084;ENSG00000131732;ENSG00000131966;ENSG00000134058;ENSG00000140157;ENSG00000143183;ENSG00000144746…	VTA1;GLT8D1;SNAPC1;TBPL1;RIOK2;TMED2;SCFD1;PSMD10;CLN5;PSMA2;PDCD10;TXNDC9;ORC4;NSL1;COPS5;MTIF3;TSFM;PPCS;PSMA1;ZCCHC9;ACTR10;CDK7;NIPA2;TMCO1;ARL6IP5;COMMD3;GGPS1;SRP19;TMEM251;ZUFSP;VBP1;SLC35A1;MICU2;FAM204A;DNAJC7;COMMD8;UGP2;TEFM;SEP15;PPP1CC;C8orf76;HDAC2;SDHD	0.144014	1.46717	0.0327402	0.0439198	-0.434585	0.00766987	0.0337474	miR-181d-5p/miR-124-3p	ENSG00000155959/ENSG00000169019	2.007/-0.016	0.119/0.621	1/1	0.219165	0.0818615	0.223073	0.0764256	0.25728	0.0401344	0.2469	0.46317	0.93505	0.42044	0.036821	0	0	101	0	0	hsa04110 (Cell cycle)	P00049 (Parkinson disease)	R-HSA-68827 (CDT1 association with the CDC6:ORC:origin complex)	WP183 (Proteasome Degradation)	GO:0006354 (DNA-templated transcription, elongation)
M:ME101	thistle1	71	ENSG00000005893;ENSG00000006652;ENSG00000011198;ENSG00000064225;ENSG00000065559;ENSG00000067082;ENSG00000079257;ENSG00000092871;ENSG00000100483;ENSG00000113161;ENSG00000113532;ENSG00000116741;ENSG00000124224;ENSG00000124356;ENSG00000134152;ENSG00000135525;ENSG00000135766;ENSG00000135821;ENSG00000136044;ENSG00000139370;ENSG00000139946;ENSG00000143149;ENSG00000143384;ENSG00000150403;ENSG00000151466…	LAMP2;IFRD1;ABHD5;ST3GAL6;MAP2K4;KLF6;LXN;RFFL;VCPKMT;HMGCR;ST8SIA4;RGS2;PPP4R1L;STAMBP;KATNBL1;MAP7;EGLN1;GLUL;APPL2;SLC15A4;PELI2;ALDH9A1;MCL1;TMCO3;SCLT1;RASSF3;PPP4R1;TMEM55A;MCU;SLC22A15;PIGX;LETM2;TMEM71;HNRNPK;C7orf34;IKBIP;CLPX;SDC2;TMEM154;CEP19;CTBP2;SLC35E3;C18orf32;OAZ2;HIST1H2AC;CEP63;CCDC125;IRS2;C3orf62;MSL1;HIST2H2BF;AGER;TRIM39;ANKUB1;ARHGAP19;RP11-70C1.1;LINC01506;RP11-59D5__B.2…	0.139888	1.69123	0.000929985	0.00213122	-0.349615	0.325731	0.513588	miR-4286/miR-532-3p/miR-320b/miR-92a-3p/miR-124-3p	ENSG00000135821/ENSG00000135821/ENSG00000135821/ENSG00000165119/ENSG00000135821,ENSG00000165119	2.544/2.01/1.548/1.283/0.176	0.072/0.119/0.182/0.231/0.472	0.635026226115176/0.635026226115176/0.635026226115176/0.635026226115176/1	0.23381	0.0629591	0.211483	0.0934346	0.0251857	0.843401	0.064375	0.018387	0.19652	0.12709	0.72804	0	0	0	0	0	hsa04923 (Regulation of lipolysis in adipocytes)	P06959 (CCKR signaling map)	R-HSA-5689901 (Metalloprotease DUBs)	WP231 (TNF alpha Signaling Pathway)	GO:0009743 (response to carbohydrate)
M:ME21	skyblue	121	ENSG00000001084;ENSG00000005469;ENSG00000014123;ENSG00000028203;ENSG00000064933;ENSG00000067533;ENSG00000068885;ENSG00000069493;ENSG00000074935;ENSG00000079335;ENSG00000080819;ENSG00000085382;ENSG00000089123;ENSG00000101695;ENSG00000101901;ENSG00000104177;ENSG00000104290;ENSG00000105849;ENSG00000106460;ENSG00000107164;ENSG00000109184;ENSG00000111605;ENSG00000111615;ENSG00000111785;ENSG00000112200…	GCLC;CROT;UFL1;VEZT;PMS1;RRP15;IFT80;CLEC2D;TUBE1;CDC14A;CPOX;HACE1;TASP1;RNF125;ALG13;MYEF2;FZD3;TWISTNB;TMEM106B;FUBP3;DCUN1D4;CPSF6;KRR1;RIC8B;ZNF451;ARL6;NPHP3;SLC25A36;WDR75;TIA1;SRSF11;VAMP4;SLC35A3;ANKRD13C;HELLS;PYROXD1;TRMT13;CCDC18;USP45;MTRR;UPF3B;HNRNPR;PHF10;TXLNGY;ZRANB2;RFXAP;GPALPP1;C12orf29;DPH6;MDFIC;ABCB10;COG3;SETDB2;CREBZF;LARP1B;AEBP2;RBM26;NAA30;ETAA1;ZC3H8;FBXL17;PM20D2;TM…	0.139163	-1.94893	0.000547345	0.00153182	-0.303879	0.9091	0.943406	miR-92a-3p/miR-124-3p	ENSG00000139977/ENSG00000113966	0.75/-1.05	0.361/0.935	1/1	-0.192028	0.128478	-0.183305	0.147099	0.195672	0.121252	0.22176	0.042177	0.1676	0.93435	0.042093	0	0	0	0	0	hsa00510 (N-Glycan biosynthesis)	P00057 (Wnt signaling pathway)	R-HSA-6811440 (Retrograde transport at the Trans-Golgi-Network)	WP3 (Phytochemical activity on NRF2 transcriptional activation)	GO:0006397 (mRNA processing)
M:ME59	lavenderblush3	122	ENSG00000032389;ENSG00000034510;ENSG00000047579;ENSG00000048162;ENSG00000060688;ENSG00000068438;ENSG00000071462;ENSG00000074842;ENSG00000081692;ENSG00000085662;ENSG00000085998;ENSG00000087191;ENSG00000090266;ENSG00000091483;ENSG00000100029;ENSG00000100138;ENSG00000100823;ENSG00000100983;ENSG00000102898;ENSG00000104872;ENSG00000105171;ENSG00000105197;ENSG00000105677;ENSG00000106263;ENSG00000107223…	TSSC1;TMSB10;DTNBP1;NOP16;SNRNP40;FTSJ1;WBSCR22;MYDGF;JMJD4;AKR1B1;POMGNT1;PSMC5;NDUFB2;FH;PES1;SNU13;APEX1;GSS;NUTF2;PIH1D1;POP4;TIMM50;TMEM147;EIF3B;EDF1;ICAM2;CD81;RRP9;DGUOK;MOGS;AUP1;POLE4;MRPS15;EBNA1BP2;ERI3;NENF;NDUFA8;IFI27L2;IFT43;PRDX4;WDR83;MRPS7;ITPA;PRMT1;GFER;SUMF2;SERGEF;MPDU1;ILKAP;TOE1;CDK4;TACO1;IMP4;DPM2;UQCC2;MRPL15;ATRAID;NABP2;COMMD4;NOB1;SAE1;GEMIN7;MRPL9;SRPRB;NHP2;FARS2;…	0.13597	NA	NA	NA	-0.414981	0.000201918	0.00185092	miR-124-3p	ENSG00000197448	-1.059	0.937	1	0.069873	0.583254	0.0574537	0.65203	0.0506843	0.690823	0.65164	0.21744	0.5093	0.45716	0.60003	1	0	8	0	6	hsa03010 (Ribosome)	P02739 (De novo pyrimidine deoxyribonucleotide biosynthesis)	R-HSA-5389840 (Mitochondrial translation elongation)	WP4521 (Glycosylation and related congenital defects)	GO:0140053 (mitochondrial gene expression)
M:ME41	mediumpurple2	57	ENSG00000049769;ENSG00000058600;ENSG00000065717;ENSG00000072195;ENSG00000088899;ENSG00000100105;ENSG00000105486;ENSG00000105717;ENSG00000108474;ENSG00000111203;ENSG00000114735;ENSG00000121310;ENSG00000124228;ENSG00000125731;ENSG00000126217;ENSG00000126970;ENSG00000130590;ENSG00000130714;ENSG00000135127;ENSG00000136717;ENSG00000137070;ENSG00000137817;ENSG00000140511;ENSG00000141456;ENSG00000144504…	PPP1R3F;POLR3E;TLE2;SPEG;LZTS3;PATZ1;LIG1;PBX4;PIGL;ITFG2;HEMK1;ECHDC2;DDX27;SH2D3A;MCF2L;ZC4H2;SAMD10;POMT1;BICDL1;BIN1;IL11RA;PARP6;HAPLN3;PELP1;ANKMY1;COPS7B;DIS3L2;CARMIL2;C5orf45;PLXDC1;TMEM143;TMC8;LTBP3;SLC29A2;sept.1;SLC26A11;TMEM198B;ANO9;DDX51;TMEM120B;FBF1;EVL;LINC01089;TNFRSF25;RP11-228B15.4;DBH-AS1;TP73-AS1;SLC25A25-AS1;TMEM147-AS1;GOLGA2P5;UBAP1L;HAUS5;RP11-660L16.2;RP11-705C15.2;RP…	0.132607	-1.67712	0.00404263	0.00741149	-0.38321	0.0504658	0.160698	miR-124-3p	ENSG00000185163	-0.298	0.724	1	-0.175504	0.165396	-0.16515	0.192186	0.0693985	0.58582	0.79474	0.876	0.0017588	0.74894	0.34648	0	0	0	0	0	hsa04060 (Cytokine-cytokine receptor interaction)	P00036 (Interleukin signaling pathway)	R-HSA-6781827 (Transcription-Coupled Nucleotide Excision Repair (TC-NER))	WP4337 (ncRNAs involved in STAT3 signaling in hepatocellular carcinoma)	GO:0016072 (rRNA metabolic process)
M:ME24	darkorange2	106	ENSG00000001631;ENSG00000004700;ENSG00000005700;ENSG00000011566;ENSG00000012174;ENSG00000014824;ENSG00000025796;ENSG00000067704;ENSG00000069956;ENSG00000074695;ENSG00000087470;ENSG00000089048;ENSG00000099810;ENSG00000101624;ENSG00000101751;ENSG00000102753;ENSG00000103342;ENSG00000104331;ENSG00000104756;ENSG00000108091;ENSG00000109189;ENSG00000109618;ENSG00000111300;ENSG00000111358;ENSG00000111530…	KRIT1;RECQL;IBTK;MAP4K3;MBTPS2;SLC30A9;SEC63;IARS2;MAPK6;LMAN1;DNM1L;ESF1;MTAP;CEP76;POLI;KPNA3;GSPT1;IMPAD1;KCTD9;CCDC6;USP46;SEPSECS;NAA25;GTF2H3;CAND1;HCFC2;SMC4;DNAJC27;CLIP4;TAF1B;FAM20B;ACADM;DARS2;PKD2;IDE;SLC10A7;FYTTD1;FAM35A;RAP2A;RAB2B;GCH1;CDK8;RFC3;CEPT1;WDR36;TES;VPS36;BRIP1;BARD1;sept.11;CUL4A;INTS7;LNPK;LIMD1;RABL3;CAMK2D;USP53;MMS22L;MTDH;HAUS6;SRFBP1;USP12;MCOLN2;ANKRD40;AGPAT5;…	0.12933	-2.00235	0.000500751	0.00153182	-0.348773	0.272389	0.475675	miR-5585-3p/miR-320b/miR-181d-5p/miR-92a-3p/miR-124-3p	ENSG00000175505/ENSG00000166483/ENSG00000166483/ENSG00000166483/ENSG00000138758,ENSG00000166483	3.878/1.148/1.105/0.882/-0.225	0.019/0.26/0.269/0.325/0.688	0.21335172777182/0.892580527569104/0.892580527569104/0.892580527569104/1	-0.221281	0.0788815	-0.202621	0.108335	0.0441201	0.729213	0.73776	0.9551	0.16043	0.42826	0.71581	0	0	0	0	0	hsa03440 (Homologous recombination)	P00034 (Integrin signalling pathway)	R-HSA-5685938 (HDR through Single Strand Annealing (SSA))	WP2446 (Retinoblastoma Gene in Cancer)	GO:0006289 (nucleotide-excision repair)
M:ME12	darkorange	127	ENSG00000005436;ENSG00000006634;ENSG00000011295;ENSG00000018699;ENSG00000025156;ENSG00000034693;ENSG00000050426;ENSG00000066651;ENSG00000076043;ENSG00000079134;ENSG00000082196;ENSG00000083123;ENSG00000083544;ENSG00000083720;ENSG00000086189;ENSG00000096092;ENSG00000105176;ENSG00000105865;ENSG00000106443;ENSG00000109762;ENSG00000111364;ENSG00000112425;ENSG00000114107;ENSG00000116824;ENSG00000118420…	GCFC2;DBF4;TTC19;TTC27;HSF2;PEX3;LETMD1;TRMT11;REXO2;THOC1;C1QTNF3;BCKDHB;TDRD3;OXCT1;DIMT1;TMEM14A;URI1;DUS4L;PHF14;SNX25;DDX55;EPM2A;CEP70;CD2;UBE3D;GALNT12;ACYP1;MTRF1;SOCS2;ZNF639;MRS2;ATP5S;HS3ST3B1;ARMCX5;OSGEPL1;ERMARD;CDC16;C12orf65;HABP4;ELP2;HNRNPA1;TEX10;AMIGO2;CCDC65;HNRNPA1L2;ZNF287;RABL2A;LIPT1;TAMM41;KRBOX4;RBMX;FBXO25;KAT14;BUB3;TMEM237;NDUFAF6;NAE1;CD3G;ZNF382;ZNF75A;FXN;FAM227B;…	0.127371	-2.00189	0.000560852	0.00153182	-0.348008	0.344085	0.518484	miR-92a-3p/miR-124-3p	ENSG00000109762/ENSG00000130921	0.701/-1.099	0.375/0.943	1/1	-0.203412	0.106934	-0.187558	0.137783	0.233819	0.0629487	0.73912	0.82333	0.56529	0.12748	0.90683	0	0	0	0	2	hsa03040 (Spliceosome)	P02739 (De novo pyrimidine deoxyribonucleotide biosynthesis)	R-HSA-141405 (Inhibition of the proteolytic activity of APC/C required for the onset of anaphase by mitotic spindle checkpoint components)	WP179 (Cell Cycle)	GO:0009451 (RNA modification)
M:ME109	darkred	132	ENSG00000003436;ENSG00000005961;ENSG00000011105;ENSG00000013016;ENSG00000029534;ENSG00000035403;ENSG00000042062;ENSG00000047648;ENSG00000049323;ENSG00000061918;ENSG00000070182;ENSG00000072422;ENSG00000073792;ENSG00000074416;ENSG00000079308;ENSG00000081377;ENSG00000082781;ENSG00000085733;ENSG00000088053;ENSG00000088726;ENSG00000088826;ENSG00000095303;ENSG00000100351;ENSG00000100678;ENSG00000101082…	TFPI;ITGA2B;TSPAN9;EHD3;ANK1;VCL;FAM65C;ARHGAP6;LTBP1;GUCY1B3;SPTB;RHOBTB1;IGF2BP2;MGLL;TNS1;CDC14B;ITGB5;CTTN;GP6;TMEM40;SMOX;PTGS1;GRAP2;SLC8A3;SLA2;MYL9;TNNC2;PCYT1B;SEC14L5;CABP5;SERPINE1;DNM1;PDLIM1;SLC6A4;ALOX12;ABCC3;KIAA1211;VWF;ACRBP;SPARC;ODC1;MPL;C1orf198;CLU;CALD1;F13A1;CDKN1A;HRASLS;F2RL3;VIL1;GNG11;GNAZ;WASF3;TMCC2;SPOCD1;GMPR;MMRN1;EGF;TPM1;PCSK6;TGFB1I1;KIFC3;PTPRF;AQP10;CTDSPL;SN…	0.12705	-2.00305	0.000574053	0.00153182	-0.342022	0.330665	0.513588	miR-4286/miR-124-3p	ENSG00000149218/ENSG00000149218	1.924/-1.137	0.129/0.95	1/1	-0.155793	0.218959	-0.152313	0.229551	-0.0996549	0.433346	0.50181	0.08956	0.50017	0.60482	0.57865	6	1	25	4	19	hsa04610 (Complement and coagulation cascades)	P00011 (Blood coagulation)	R-HSA-109582 (Hemostasis)	WP558 (Complement and Coagulation Cascades)	GO:0050817 (coagulation)
M:ME31	honeydew	47	ENSG00000006432;ENSG00000010818;ENSG00000048471;ENSG00000049618;ENSG00000054654;ENSG00000067369;ENSG00000068654;ENSG00000078699;ENSG00000080503;ENSG00000086758;ENSG00000090863;ENSG00000103222;ENSG00000103657;ENSG00000114841;ENSG00000115568;ENSG00000115760;ENSG00000116128;ENSG00000116580;ENSG00000118058;ENSG00000119509;ENSG00000119596;ENSG00000124942;ENSG00000128731;ENSG00000130723;ENSG00000131149…	MAP3K9;HIVEP2;SNX29;ARID1B;SYNE2;TP53BP1;POLR1A;CBFA2T2;SMARCA2;HUWE1;GLG1;ABCC1;HERC1;DNAH1;ZNF142;BIRC6;BCL9;GON4L;KMT2A;INVS;YLPM1;AHNAK;HERC2;PRRC2B;GSE1;PIK3C2B;SLC41A1;ZCCHC11;ANKRD52;POGZ;RPRD2;C2CD3;LUZP1;SIK2;HECTD4;BCOR;EP400;AMER1;GPATCH8;TRRAP;DYNC1H1;ADARB1;JRK;MICAL3;CTC-523E23.4;SOCS7;SYNRG	0.125926	-1.85694	0.00138744	0.00289749	-0.325547	0.661525	0.795289	NA	NA	NA	NA	NA	-0.269266	0.0314305	-0.257757	0.0397531	-0.135705	0.284981	0.29561	0.2234	0.23891	0.58532	0.0057134	0	0	0	1	0	hsa04120 (Ubiquitin mediated proteolysis)	P00057 (Wnt signaling pathway)	R-HSA-3247509 (Chromatin modifying enzymes)	WP4312 (Rett syndrome causing genes)	GO:1904837 (beta-catenin-TCF complex assembly)
M:ME11	skyblue3	95	ENSG00000004897;ENSG00000006576;ENSG00000023909;ENSG00000047932;ENSG00000066557;ENSG00000078304;ENSG00000081019;ENSG00000087095;ENSG00000092140;ENSG00000104064;ENSG00000104626;ENSG00000106993;ENSG00000107758;ENSG00000108443;ENSG00000115419;ENSG00000115942;ENSG00000116497;ENSG00000117155;ENSG00000117569;ENSG00000119787;ENSG00000121644;ENSG00000126821;ENSG00000127989;ENSG00000132436;ENSG00000135341…	CDC27;PHTF2;GCLM;GOPC;LRRC40;PPP2R5C;RSBN1;NLK;G2E3;GABPB1;ERI1;CDC37L1;PPP3CB;RPS6KB1;GLS;ORC2;S100PBP;SSX2IP;PTBP2;ATL2;DESI2;SGPP1;MTERF1;FIGNL1;MAP3K7;ATAD1;DBR1;AP1AR;ETNK1;POC1B;TMTC3;SLC46A3;UBE2Q2;MTF2;METTL14;SLC30A5;ZNF92;TMEM168;UTP23;AASDHPPT;PIP4K2A;CSNK1G3;SREK1IP1;TMEM87B;PPP2R5E;TBCEL;ABCA5;C21orf91;APOOL;ZCCHC10;RASA2;SASS6;EIF4A2;RUNX1;USP1;TYW3;DUSP19;CGGBP1;LRRC58;RYK;CEP44;SL…	0.125714	-1.92741	0.000464684	0.00153182	-0.351635	0.25343	0.475675	NA	NA	NA	NA	NA	-0.202173	0.109134	-0.196656	0.119353	0.0976997	0.442468	0.8755	0.44287	0.8591	0.92733	0.32236	0	1	0	0	0	hsa04114 (Oocyte meiosis)	P00057 (Wnt signaling pathway)	R-HSA-6811558 (PI5P, PP2A and IER3 Regulate PI3K/AKT Signaling)	WP399 (Wnt Signaling Pathway and Pluripotency)	GO:0198738 (cell-cell signaling by wnt)
M:ME8	salmon	144	ENSG00000011258;ENSG00000011405;ENSG00000017260;ENSG00000031003;ENSG00000034677;ENSG00000052723;ENSG00000052795;ENSG00000053770;ENSG00000056097;ENSG00000056586;ENSG00000059758;ENSG00000060749;ENSG00000061987;ENSG00000064313;ENSG00000066422;ENSG00000067248;ENSG00000067646;ENSG00000072756;ENSG00000075292;ENSG00000077232;ENSG00000077254;ENSG00000080345;ENSG00000080802;ENSG00000082258;ENSG00000082269…	MBTD1;PIK3C2A;ATP2C1;FAM13B;RNF19A;SIKE1;FNIP2;AP5M1;ZFR;RC3H2;CDK17;QSER1;MON2;TAF2;ZBTB11;DHX29;ZFY;TRNT1;ZNF638;DNAJC10;USP33;RIF1;CNOT4;CCNT2;FAM135A;DIS3;WDFY1;EPS15;GPATCH2;SUCO;SIRT1;SEC23A;XIAP;ATP11C;FNDC3A;CCP110;MTMR9;GLCCI1;C5;SEC23IP;TNKS2;ACBD5;CLCN3;C2CD5;FBXL4;MAN2A1;CLINT1;CNOT6;FAM172A;SEC24A;TTC33;XRN1;KAT2B;ECT2;ATF2;DNAJC6;RAB3GAP2;KLHL7;FAM126A;PARD6B;CANX;RNF6;FAM63B;CCNT1;…	0.123351	-1.95581	0.000598802	0.00153182	0.301828	0.0625	0.185811	NA	NA	NA	NA	NA	-0.158993	0.209524	-0.14705	0.24624	-0.0106581	0.933385	0.59416	0.73286	0.39102	0.89611	0.25137	0	0	0	0	0	hsa03018 (RNA degradation)	P00030 (Hypoxia response via HIF activation)	R-HSA-983170 (Antigen Presentation: Folding, assembly and peptide loading of class I MHC)	WP4746 (Thyroid hormones production and their peripheral downstream signalling effects regarding congenital hypothyroidism)	GO:1990778 (protein localization to cell periphery)
M:ME87	plum1	95	ENSG00000010704;ENSG00000018189;ENSG00000019991;ENSG00000038382;ENSG00000064989;ENSG00000068489;ENSG00000080200;ENSG00000085491;ENSG00000088812;ENSG00000088854;ENSG00000089041;ENSG00000091436;ENSG00000100077;ENSG00000101347;ENSG00000104447;ENSG00000105967;ENSG00000106034;ENSG00000108239;ENSG00000109436;ENSG00000109606;ENSG00000109667;ENSG00000111961;ENSG00000113494;ENSG00000115355;ENSG00000116711…	HFE;RUFY3;HGF;TRIO;CALCRL;PRR11;CRYBG3;SLC25A24;ATRN;C20orf194;P2RX7;AC013461.1;GRK3;SAMHD1;TRPS1;TFEC;CPED1;TBC1D12;TBC1D9;DHX15;SLC2A9;SASH1;PRLR;CCDC88A;PLA2G4A;DCLRE1B;CCR2;NLN;BTN2A3P;FMO5;BTBD3;HSD17B4;NARS;CD36;CPM;CYP1B1;GLCE;SCARB2;SLC24A4;ZFHX3;APP;CTTNBP2NL;NCEH1;SETD7;MARCH1;SRD5A1;ERLIN2;SNX30;ZC3H12C;FADS1;SOGA1;ANKRD50;DST;SPOCK1;ADAMTS5;PPARGC1B;NEU3;SGMS2;TMEM144;FAM198B;ALDH1A1;…	0.114136	1.70643	0.000382166	0.00153182	0.284432	0.515152	0.674603	miR-124-3p	ENSG00000135218,ENSG00000168615,ENSG00000183723	0.29	0.355	1	0.227029	0.0712203	0.235975	0.0604909	0.0272607	0.830682	0.081904	0.99674	0.71977	0.42866	0.66642	0	0	0	0	0	hsa00600 (Sphingolipid metabolism)	P00003 (Alzheimer disease-amyloid secretase pathway)	R-HSA-2046104 (alpha-linolenic (omega3) and linoleic (omega6) acid metabolism)	WP98 (Prostaglandin Synthesis and Regulation)	GO:1990845 (adaptive thermogenesis)
M:ME79	lightblue4	34	ENSG00000006534;ENSG00000020181;ENSG00000030582;ENSG00000032444;ENSG00000053918;ENSG00000072958;ENSG00000078808;ENSG00000090013;ENSG00000090339;ENSG00000090674;ENSG00000101986;ENSG00000105223;ENSG00000105329;ENSG00000105556;ENSG00000110057;ENSG00000116786;ENSG00000126522;ENSG00000131446;ENSG00000149781;ENSG00000160255;ENSG00000160404;ENSG00000160883;ENSG00000163956;ENSG00000170265;ENSG00000170619…	ALDH3B1;ADGRA2;GRN;PNPLA6;KCNQ1;AP1M1;SDF4;BLVRB;ICAM1;MCOLN1;ABCD1;PLD3;TGFB1;MIER2;UNC93B1;PLEKHM2;ASL;MGAT1;FERMT3;ITGB2;TOR2A;HK3;LRPAP1;ZNF282;COMMD5;CORO1B;GPR35;NPLOC4;IRAK1;CA5BP1;TOR4A;FAM109A;RP11-293M10.6;BAHCC1	0.113391	1.61644	0.00689453	0.0114909	-0.3617	0.264831	0.475675	miR-124-3p	ENSG00000006534,ENSG00000030582,ENSG00000090339,ENSG00000182446	1.605	0.007	0.0729856694704659	0.257829	0.0396963	0.251968	0.0445851	-0.13054	0.303883	0.57747	0.65949	0.89974	0.74029	0.55509	0	0	0	0	0	hsa05144 (Malaria)	P00054 (Toll receptor signaling pathway)	R-HSA-6785807 (Interleukin-4 and Interleukin-13 signaling)	WP4493 (Cells and Molecules involved in local acute inflammatory response)	GO:0033627 (cell adhesion mediated by integrin)
M:ME30	coral3	245	ENSG00000005483;ENSG00000005844;ENSG00000008256;ENSG00000008513;ENSG00000008869;ENSG00000009413;ENSG00000011454;ENSG00000021776;ENSG00000023839;ENSG00000029725;ENSG00000040933;ENSG00000047315;ENSG00000047410;ENSG00000048649;ENSG00000048707;ENSG00000053254;ENSG00000057657;ENSG00000058668;ENSG00000064393;ENSG00000065457;ENSG00000065883;ENSG00000066739;ENSG00000072364;ENSG00000074054;ENSG00000075539…	KMT2E;ITGAL;CYTH3;ST3GAL1;HEATR5B;REV3L;RABGAP1;AQR;ABCC2;RABEP1;INPP4A;POLR2B;TPR;RSF1;VPS13D;FOXN3;PRDM1;ATP2B4;HIPK2;ADAT1;CDK13;ATG2B;AFF4;CLASP1;FRYL;DYNC1I2;MAGI3;ERC1;DOPEY1;CYLD;REST;ATRX;MAST2;SLC23A2;GPATCH2L;GOLGA3;WDR7;HECTD1;HMGXB4;ZBED4;TRIP11;ZMYND8;KIF3B;CEP192;RNMT;PHKB;NFAT5;USP31;RBL2;XYLT1;SPG11;UBR5;ZKSCAN1;USP42;RIC1;EIF3A;FAM208B;SMC3;MED13;PPFIBP1;PRDM4;C12orf49;MED23;GPLD…	0.110558	-1.87665	0.000976562	0.00219228	-0.324287	0.781222	0.868024	miR-92a-3p/miR-124-3p	ENSG00000090615/ENSG00000111412	0.044/-1.756	0.598/0.996	1/1	-0.17511	0.166362	-0.160114	0.206287	-0.109409	0.389453	0.94393	0.21608	0.60904	0.50629	0.18023	20	0	0	1	0	hsa04925 (Aldosterone synthesis and secretion)	P00019 (Endothelin signaling pathway)	R-HSA-3214841 (PKMTs methylate histone lysines)	WP3584 (MECP2 and Associated Rett Syndrome)	GO:0006352 (DNA-templated transcription, initiation)
M:ME40	palevioletred1	28	ENSG00000001497;ENSG00000041880;ENSG00000087087;ENSG00000089053;ENSG00000099284;ENSG00000101361;ENSG00000101391;ENSG00000102901;ENSG00000115073;ENSG00000119688;ENSG00000125450;ENSG00000125459;ENSG00000126749;ENSG00000130713;ENSG00000132879;ENSG00000134262;ENSG00000134574;ENSG00000136271;ENSG00000137700;ENSG00000143224;ENSG00000145191;ENSG00000149483;ENSG00000160124;ENSG00000163703;ENSG00000171824…	LAS1L;PARP3;SRRT;ANAPC5;H2AFY2;NOP56;CDK5RAP1;CENPT;ACTR1B;ABCD4;NUP85;MSTO1;EMG1;EXOSC2;FBXO44;AP4B1;DDB2;DDX56;SLC37A4;PPOX;EIF2B5;TMEM138;CCDC58;CRELD1;EXOSC10;CDK10;GALT;NSUN5P1	0.109779	NA	NA	NA	-0.472134	0.00190306	0.00996839	NA	NA	NA	NA	NA	-0.0155584	0.902882	-0.0126727	0.920831	0.0728481	0.567281	0.10562	0.25682	0.37746	0.48027	0.77545	0	0	3	0	2	hsa03008 (Ribosome biogenesis in eukaryotes)	P02744 (Fructose galactose metabolism)	R-HSA-6791226 (Major pathway of rRNA processing in the nucleolus and cytosol)	WP4553 (FBXL10 enhancement of MAP/ERK signaling in diffuse large B-cell lymphoma)	GO:0016072 (rRNA metabolic process)
M:ME69	blueviolet	30	ENSG00000069399;ENSG00000105722;ENSG00000123329;ENSG00000125753;ENSG00000125952;ENSG00000129911;ENSG00000135334;ENSG00000138772;ENSG00000141526;ENSG00000143862;ENSG00000145491;ENSG00000148926;ENSG00000153048;ENSG00000153487;ENSG00000163421;ENSG00000167470;ENSG00000167874;ENSG00000170892;ENSG00000170909;ENSG00000172216;ENSG00000174021;ENSG00000185262;ENSG00000185896;ENSG00000226266;ENSG00000231856…	BCL3;ERF;ARHGAP9;VASP;MAX;KLF16;AKIRIN2;ANXA3;SLC16A3;ARL8A;ROPN1L;ADM;CARHSP1;ING1;PROK2;MIDN;TMEM88;TSEN34;OSCAR;CEBPB;GNG5;UBALD2;LAMP1;AC009961.3;RP11-327P2.5;CCDC71L;INAFM1;RP11-960L18.1;RP11-580I16.2;RARA-AS1	0.108925	1.66724	0.00284048	0.00548164	-0.325027	0.700532	0.819771	miR-124-3p	ENSG00000138772	0.344	0.492	1	0.270356	0.030724	0.237576	0.0587164	0.0099555	0.937767	0.30376	0.55392	0.42065	0.43579	0.6598	0	0	0	0	0	hsa04668 (TNF signaling pathway)	P00047 (PDGF signaling pathway)	R-HSA-373080 (Class B/2 (Secretin family receptors))	WP615 (Senescence and Autophagy in Cancer)	GO:0031099 (regeneration)
M:ME95	navajowhite2	71	ENSG00000012822;ENSG00000044446;ENSG00000047578;ENSG00000051009;ENSG00000067596;ENSG00000070476;ENSG00000082641;ENSG00000084234;ENSG00000100227;ENSG00000100345;ENSG00000100441;ENSG00000100991;ENSG00000102034;ENSG00000102699;ENSG00000104974;ENSG00000107882;ENSG00000108509;ENSG00000114648;ENSG00000115677;ENSG00000120314;ENSG00000125447;ENSG00000128815;ENSG00000129933;ENSG00000131504;ENSG00000132694…	CALCOCO1;PHKA2;KIAA0556;FAM160A2;DHX8;ZXDC;NFE2L1;APLP2;POLDIP3;MYH9;KHNYN;TRPC4AP;ELF4;PARP4;LILRA1;SUFU;CAMTA2;KLHL18;HDLBP;WDR55;GGA3;WDFY4;MAU2;DIAPH1;ARHGEF11;DOCK2;TLN1;PLCB2;GLYR1;DHX38;MBD1;WDTC1;STRIP1;SETDB1;MSN;TGOLN2;LRRK1;HK1;ZDHHC5;ABR;BSDC1;NCSTN;YY1AP1;RNF123;VCP;VPS39;MARS;STIM1;ITGAM;GTPBP2;DDX23;ARID3B;COPG1;SRPRA;FCAR;CLN3;MTF1;MAML3;FCHSD1;LDB1;F5;ATG9A;DCTN1;PLEKHM1P1;ZSWIM8…	0.106298	1.70932	0.000664275	0.00166069	-0.381541	0.0282857	0.103714	miR-1270/miR-92a-3p/miR-124-3p	ENSG00000084234/ENSG00000084234/ENSG00000198734,ENSG00000269858	2.892/1.283/0.176	0.051/0.231/0.472	0.561914430518711/1/1	0.225099	0.0737229	0.219661	0.0811552	-0.19728	0.118161	0.92879	0.14812	0.16755	0.17421	0.083391	0	0	0	0	0	hsa04973 (Carbohydrate digestion and absorption)	P00016 (Cytoskeletal regulation by Rho GTPase)	R-HSA-114608 (Platelet degranulation)	WP4241 (Type 2 papillary renal cell carcinoma)	GO:0042982 (amyloid precursor protein metabolic process)
M:ME6	greenyellow	198	ENSG00000005889;ENSG00000007168;ENSG00000009307;ENSG00000010072;ENSG00000015479;ENSG00000023228;ENSG00000023287;ENSG00000025293;ENSG00000032219;ENSG00000037749;ENSG00000048828;ENSG00000051382;ENSG00000054267;ENSG00000055208;ENSG00000055917;ENSG00000057252;ENSG00000058063;ENSG00000058272;ENSG00000062650;ENSG00000065413;ENSG00000065613;ENSG00000068366;ENSG00000068878;ENSG00000069869;ENSG00000070961…	ZFX;PAFAH1B1;CSDE1;SPRTN;MATR3;NDUFS1;RB1CC1;PHF20;ARID4A;MFAP3;FAM120A;PIK3CB;ARID4B;TAB2;PUM2;SOAT1;ATP11B;PPP1R12A;WAPL;ANKRD44;SLK;ACSL4;PSME4;NEDD4;ATP2B1;SEL1L;FBXW11;DPP8;FNDC3B;ITCH;SENP1;PTPRC;FYB;BZW1;TNPO1;PDS5B;CPNE3;MAP3K1;JAK2;TMED8;HIF1A;ADNP;RPRD1B;STAG2;DMXL2;SNX16;ANKRD27;LMBR1;WASL;NUFIP2;GOSR1;SMURF2;GALNT7;KLHL5;EIF4G2;DDX6;HIPK3;CSRNP2;MCM9;MAN1A1;AIM1;HBS1L;SENP6;ERBIN;FRMD…	0.101516	-1.33237	0.0135674	0.0207002	-0.324054	0.746225	0.846235	NA	NA	NA	NA	NA	-0.0489007	0.701182	-0.0463519	0.71608	-0.0808558	0.525338	0.64798	0.004811	0.50545	0.40273	0.075933	0	2	3	1	6	hsa04024 (cAMP signaling pathway)	P00053 (T cell activation)	R-HSA-2468052 (Establishment of Sister Chromatid Cohesion)	WP437 (EGF/EGFR Signaling Pathway)	GO:0016050 (vesicle organization)
M:ME14	orangered1	37	ENSG00000005801;ENSG00000047621;ENSG00000058804;ENSG00000068912;ENSG00000088205;ENSG00000090612;ENSG00000100372;ENSG00000110031;ENSG00000113328;ENSG00000118246;ENSG00000120370;ENSG00000120805;ENSG00000123106;ENSG00000124523;ENSG00000124784;ENSG00000126261;ENSG00000128050;ENSG00000128513;ENSG00000130935;ENSG00000133739;ENSG00000134077;ENSG00000135316;ENSG00000144736;ENSG00000147419;ENSG00000147853…	ZNF195;C12orf4;NDC1;ERLEC1;DDX18;ZNF268;SLC25A17;LPXN;CCNG1;FASTKD2;GORAB;ARL1;CCDC91;SIRT5;RIOK1;UBA2;PAICS;POT1;NOL11;LRRCC1;THUMPD3;SYNCRIP;SHQ1;CCDC25;AK3;DLAT;RAD17;AASDH;HELQ;METAP1;ABCE1;MIOS;API5;ATMIN;MINA;SDAD1;HN1L	0.09982	-1.70247	0.00578964	0.0102719	-0.347859	0.458146	0.622173	miR-5585-3p/miR-4286/miR-532-3p/miR-320b/miR-181d-5p/miR-124-3p	ENSG00000206053/ENSG00000206053/ENSG00000206053/ENSG00000206053/ENSG00000206053/ENSG00000198301,ENSG00000206053	4.93/3.196/2.662/2.2/2.158/0.828	0.007/0.038/0.064/0.099/0.104/0.199	0.0747884238597222/0.208654770644538/0.227796446008955/0.227796446008955/0.227796446008955/0.365233300177701	-0.268117	0.0321892	-0.240546	0.0555362	0.137318	0.279238	0.12311	0.9353	0.52382	0.32894	0.48679	0	0	0	0	0	hsa04115 (p53 signaling pathway)	P02738 (De novo purine biosynthesis)	R-HSA-1169410 (Antiviral mechanism by IFN-stimulated genes)	WP1530 (miRNA Regulation of DNA Damage Response)	GO:0022613 (ribonucleoprotein complex biogenesis)
M:ME91	honeydew1	64	ENSG00000002549;ENSG00000010030;ENSG00000026950;ENSG00000028116;ENSG00000055130;ENSG00000059378;ENSG00000068079;ENSG00000092010;ENSG00000100336;ENSG00000100342;ENSG00000100911;ENSG00000100918;ENSG00000111335;ENSG00000115415;ENSG00000116663;ENSG00000117228;ENSG00000118162;ENSG00000120217;ENSG00000124256;ENSG00000128335;ENSG00000130303;ENSG00000130813;ENSG00000132274;ENSG00000132530;ENSG00000133106…	LAP3;ETV7;BTN3A1;VRK2;CUL1;PARP12;IFI35;PSME1;APOL4;APOL1;PSME2;REC8;OAS2;STAT1;FBXO6;GBP1;KPTN;CD274;ZBP1;APOL2;BST2;C19orf66;TRIM22;XAF1;EPSTI1;IL15RA;CMTR1;DDX60;PNPT1;PARP9;CXCL9;WARS;NLRC5;SERPING1;FCGR1A;PSTPIP2;ANKRD22;GBP5;MOV10;UBE2L6;TMEM268;GBP2;GBP4;C2;BATF2;TAP1;LGALS9;CXCL10;STAT2;PARP14;UBA7;GBP6;TRIM69;IL27;PDCD1LG2;FCGR1B;PSMB8;TAP2;APOL6;GBP1P1;PTGES3P1;PSMB9;RP11-43N16.4;BISPR	0.0922108	1.66539	0.00148168	0.00301824	-0.353866	0.358266	0.532558	NA	NA	NA	NA	NA	0.14529	0.252001	0.17747	0.160633	-0.00366891	0.977046	0.42927	0.3693	0.30979	0.66256	0.34223	5	0	128	3	26	hsa04621 (NOD-like receptor signaling pathway)	P00036 (Interleukin signaling pathway)	R-HSA-913531 (Interferon Signaling)	WP619 (Type II interferon signaling (IFNG))	GO:0034341 (response to interferon-gamma)
M:ME2	deeppink	29	ENSG00000100836;ENSG00000108774;ENSG00000115239;ENSG00000169442;ENSG00000205155;ENSG00000205542;ENSG00000214182;ENSG00000214535;ENSG00000214753;ENSG00000220842;ENSG00000223551;ENSG00000224631;ENSG00000226360;ENSG00000227615;ENSG00000228929;ENSG00000229659;ENSG00000233762;ENSG00000234912;ENSG00000235552;ENSG00000236801;ENSG00000260160;ENSG00000263266;ENSG00000267481;ENSG00000272509;ENSG00000274383…	PABPN1;RAB5C;ASB3;CD52;PSENEN;TMSB4X;PTMAP5;RPS15AP1;HNRNPUL2;RP11-572P18.1;TMSB4XP4;RPS27AP16;RPL10AP6;RP11-864N7.2;RPS13P2;RP11-345K20.2;AC007969.5;SNHG20;RPL6P27;RPL24P8;CTC-471J1.2;RPS7P1;CTC-559E9.5;RP11-347C18.5;CTD-2017F17.2;CTD-2026K11.5;RP11-196G11.5;RP11-1148L6.8;AC004381.8	0.0912533	NA	NA	NA	NA	NA	NA	NA	NA	NA	NA	NA	-0.0483072	0.704641	-0.0674353	0.596491	0.157027	0.215286	0.010977	0.92367	0.10964	0.28328	0.76062	0	0	0	0	0	hsa04962 (Vasopressin-regulated water reabsorption)	P00003 (Alzheimer disease-amyloid secretase pathway)	R-HSA-9013700 (NOTCH4 Activation and Transmission of Signal to the Nucleus)	WP4301 (Inhibition of exosome biogenesis and secretion by Manumycin A in CRPC cells)	GO:0045730 (respiratory burst)
M:ME3	brown4	79	ENSG00000004864;ENSG00000010017;ENSG00000064726;ENSG00000067167;ENSG00000067955;ENSG00000078124;ENSG00000078140;ENSG00000080822;ENSG00000093144;ENSG00000100916;ENSG00000101166;ENSG00000101888;ENSG00000104164;ENSG00000104219;ENSG00000104472;ENSG00000104695;ENSG00000106392;ENSG00000106546;ENSG00000107362;ENSG00000110696;ENSG00000111145;ENSG00000113583;ENSG00000117500;ENSG00000120686;ENSG00000120992…	SLC25A13;RANBP9;BTBD1;TRAM1;CBFB;ACER3;UBE2K;CLDND1;ECHDC1;BRMS1L;PRELID3B;NXT2;BLOC1S6;ZDHHC2;CHRAC1;PPP2CB;C1GALT1;AHR;ABHD17B;C11orf58;ELK3;C5orf15;TMED5;UFM1;LYPLA1;ZC3H7A;HNRNPA2B1;ATF1;SNRNP27;DEK;SPCS3;SH3BGRL;NAPG;RNF138;TMED7;RFK;NIPSNAP3A;GAS2L3;LPAR6;TMX1;ANP32E;VPS54;TRMT10A;RNF217;LACTB2;TERF1;C9orf72;LIN7C;CEBPG;OTUD6B;C16orf87;GATAD1;PQLC3;ARL5A;CCDC112;SPTSSA;REEP3;ARF6;TMEM68;MMG…	0.089819	1.4448	0.0205336	0.0297197	-0.367513	0.156343	0.363324	miR-4286/miR-124-3p	ENSG00000093144/ENSG00000147894	2.437/-0.624	0.079/0.832	0.872942659887319/1	0.114807	0.366344	0.12326	0.331873	0.264926	0.0343792	0.17914	0.53379	0.82988	0.27545	0.75531	0	0	0	0	0	hsa03015 (mRNA surveillance pathway)	P00060 (Ubiquitin proteasome pathway)	R-HSA-983168 (Antigen processing: Ubiquitination & Proteasome degradation)	WP2895 (Differentiation of white and brown adipocyte)	GO:1903828 (negative regulation of cellular protein localization)
M:ME89	magenta3	26	ENSG00000040531;ENSG00000068971;ENSG00000075240;ENSG00000095383;ENSG00000109066;ENSG00000110171;ENSG00000114853;ENSG00000131697;ENSG00000136286;ENSG00000136295;ENSG00000160216;ENSG00000163702;ENSG00000164889;ENSG00000165458;ENSG00000166484;ENSG00000167566;ENSG00000167670;ENSG00000172831;ENSG00000174004;ENSG00000179583;ENSG00000180061;ENSG00000181830;ENSG00000196422;ENSG00000197063;ENSG00000197226…	CTNS;PPP2R5B;GRAMD4;TBC1D2;TMEM104;TRIM3;ZBTB47;NPHP4;MYO1G;TTYH3;AGPAT3;IL17RC;SLC4A2;INPPL1;MAPK7;NCKAP5L;CHAF1A;CES2;NRROS;CIITA;TMEM150B;SLC35C1;PPP1R26;MAFG;TBC1D9B;CUX1	0.0869206	1.21085	0.215567	0.249604	-0.419262	0.00435956	0.0208501	NA	NA	NA	NA	NA	0.116152	0.360716	0.121919	0.3372	-0.20558	0.103169	0.5062	0.77244	0.37086	0.19629	0.65524	0	0	0	0	0	hsa04657 (IL-17 signaling pathway)	P00033 (Insulin/IGF pathway-protein kinase B signaling cascade)	R-HSA-425407 (SLC-mediated transmembrane transport)	WP2884 (NRF2 pathway)	GO:0030534 (adult behavior)
M:ME55	magenta4	48	ENSG00000004455;ENSG00000004487;ENSG00000031698;ENSG00000059691;ENSG00000065427;ENSG00000068394;ENSG00000072210;ENSG00000082068;ENSG00000089289;ENSG00000100220;ENSG00000100347;ENSG00000102316;ENSG00000106554;ENSG00000106605;ENSG00000109917;ENSG00000109919;ENSG00000113013;ENSG00000115241;ENSG00000116171;ENSG00000116478;ENSG00000117091;ENSG00000118705;ENSG00000130347;ENSG00000132305;ENSG00000132434…	AK2;KDM1A;SARS;GATB;KARS;GPKOW;ALDH3A2;WDR70;IGBP1;RTCB;SAMM50;MAGED2;CHCHD3;BLVRA;ZPR1;MTCH2;HSPA9;PPM1G;SCP2;HDAC1;CD48;RPN2;RTN4IP1;IMMT;LANCL2;CTNNBL1;GNL2;CCT7;COG2;ZDHHC4;UQCRC2;UTP4;AFG3L2;ILF2;HDAC8;NONO;NSDHL;ATP5A1;PTDSS1;AIFM1;CCT3;DPAGT1;FAF1;DRG1;POLR3C;POLR1D;XRCC6;CENPW	0.0770543	1.36016	0.0755139	0.0954774	-0.422615	0.00815419	0.0344985	miR-124-3p	ENSG00000106605	-0.126	0.662	1	0.179326	0.156232	0.196889	0.118908	0.108237	0.394581	0.20495	0.66729	0.089842	0.32251	0.61796	0	0	4	0	0	hsa00970 (Aminoacyl-tRNA biosynthesis)	P04372 (5-Hydroxytryptamine degredation)	R-HSA-8949613 (Cristae formation)	WP3996 (Ethanol effects on histone modifications)	GO:0007006 (mitochondrial membrane organization)
M:ME104	purple	202	ENSG00000005020;ENSG00000010404;ENSG00000013441;ENSG00000019995;ENSG00000033800;ENSG00000039319;ENSG00000048392;ENSG00000065243;ENSG00000065665;ENSG00000067208;ENSG00000069974;ENSG00000071189;ENSG00000075223;ENSG00000082212;ENSG00000084733;ENSG00000086666;ENSG00000090376;ENSG00000090989;ENSG00000092531;ENSG00000100030;ENSG00000100614;ENSG00000100784;ENSG00000101384;ENSG00000101596;ENSG00000102218…	SKAP2;IDS;CLK1;ZRANB1;PIAS1;ZFYVE16;RRM2B;PKN2;SEC61A2;EVI5;RAB27A;SNX13;SEMA3C;ME2;RAB10;ZFAND6;IRAK3;EXOC1;SNAP23;MAPK1;PPM1A;RPS6KA5;JAG1;SMCHD1;RP2;NBN;UBE2W;CARD8;AVL9;MTPN;PRKAG2;LARP4B;SHOC2;DHX40;TMEM33;ELF2;GAB1;RNF141;SUDS3;SERINC1;STK38;QKI;FAM46A;COL4A3BP;CLK4;ARRDC3;NR3C1;TRIM23;CPEB4;ACAP2;SLC35F5;STAM2;GALNT3;IL1R1;NFE2L2;FBXO30;VPS4B;YIPF4;SLC17A5;OGFRL1;PLXDC2;KBTBD7;GTDC1;AMD1;L…	0.0737556	1.47074	0.00273848	0.00547695	-0.336358	0.457037	0.622173	miR-181d-5p/miR-92a-3p/miR-124-3p	ENSG00000151012/ENSG00000151012/ENSG00000151012	0.46/0.237/-1.563	0.451/0.528/0.99	1/1/1	0.0970777	0.445392	0.0853721	0.502385	-0.0281228	0.82541	0.41023	0.69087	0.70179	0.34685	0.70775	2	0	0	12	2	hsa04010 (MAPK signaling pathway)	P00047 (PDGF signaling pathway)	R-HSA-3232118 (SUMOylation of transcription factors)	WP195 (IL-1 signaling pathway)	GO:0018209 (peptidyl-serine modification)
M:ME66	lightpink2	25	ENSG00000004777;ENSG00000090006;ENSG00000099381;ENSG00000099904;ENSG00000103168;ENSG00000111676;ENSG00000114554;ENSG00000122515;ENSG00000141258;ENSG00000141568;ENSG00000148384;ENSG00000149527;ENSG00000152117;ENSG00000158863;ENSG00000160323;ENSG00000160949;ENSG00000161996;ENSG00000162241;ENSG00000164818;ENSG00000177225;ENSG00000178188;ENSG00000182162;ENSG00000184381;ENSG00000196363;ENSG00000196700	ARHGAP33;LTBP4;SETD1A;ZDHHC8;TAF1C;ATN1;PLXNA1;ZMIZ2;SGSM2;FOXK2;INPP5E;PLCH2;AC093838.4;FAM160B2;ADAMTS13;TONSL;WDR90;SLC25A45;DNAAF5;PDDC1;SH2B1;P2RY8;PLA2G6;WDR5;ZNF512B	0.0702456	-1.67592	0.00721501	0.0118455	-0.261507	1	1	NA	NA	NA	NA	NA	-0.230421	0.0669855	-0.225576	0.0730983	-0.126539	0.31907	0.46183	0.81943	0.62643	0.45799	0.50543	0	0	0	0	0	hsa00562 (Inositol phosphate metabolism)	P00022 (General transcription by RNA polymerase I)	R-HSA-3214841 (PKMTs methylate histone lysines)	WP4723 (Omega-3/Omega-6 FA synthesis)	GO:0046486 (glycerolipid metabolic process)
M:ME105	skyblue1	58	ENSG00000062598;ENSG00000067066;ENSG00000073331;ENSG00000077420;ENSG00000079277;ENSG00000085063;ENSG00000087157;ENSG00000096063;ENSG00000100505;ENSG00000103005;ENSG00000105948;ENSG00000107566;ENSG00000108424;ENSG00000112053;ENSG00000112062;ENSG00000113368;ENSG00000113916;ENSG00000116273;ENSG00000116350;ENSG00000124201;ENSG00000128512;ENSG00000135365;ENSG00000135842;ENSG00000136715;ENSG00000137275…	ELMO2;SP100;ALPK1;APBB1IP;MKNK1;CD59;PGS1;SRPK1;TRIM9;USB1;TTC26;ERLIN1;KPNB1;SLC26A8;MAPK14;LMNB1;BCL6;PHF13;SRSF4;ZNFX1;DOCK4;PHF21A;FAM129A;SAP130;RIPK1;CASP5;MCTP2;RERE;TMEM140;SLC25A37;PTPRJ;SEC24D;ACSL1;KCNJ15;SLC37A3;B4GALT5;ADAR;SLC25A44;DHRS13;TRANK1;IRF2;PPP1R3B;STAT5B;DDX60L;LIMK2;ADGRG3;ZNF438;KREMEN1;TLR5;SELL;CACNA1E;KIAA0040;MIR3945HG;RP11-531H8.2;RP11-556I13.2;RP11-373D23.3;RP11-3…	0.0692626	1.5874	0.00589445	0.0102919	-0.366895	0.104598	0.261496	NA	NA	NA	NA	NA	0.176435	0.163128	0.153511	0.225866	-0.140633	0.267684	0.14608	0.42364	0.87219	0.52334	0.43875	0	0	0	0	0	hsa04620 (Toll-like receptor signaling pathway)	P00038 (JAK/STAT signaling pathway)	R-HSA-913531 (Interferon Signaling)	WP400 (p38 MAPK Signaling Pathway)	GO:0051169 (nuclear transport)
M:ME18	blue2	54	ENSG00000059588;ENSG00000075826;ENSG00000082512;ENSG00000101977;ENSG00000102780;ENSG00000109920;ENSG00000110888;ENSG00000113649;ENSG00000120798;ENSG00000122257;ENSG00000122417;ENSG00000125814;ENSG00000126226;ENSG00000130684;ENSG00000131791;ENSG00000132199;ENSG00000132716;ENSG00000135945;ENSG00000136527;ENSG00000137338;ENSG00000143643;ENSG00000144026;ENSG00000144580;ENSG00000151849;ENSG00000154144…	TARBP1;SEC31B;TRAF5;MCF2;DGKH;FNBP4;CAPRIN2;TCERG1;NR2C1;RBBP6;ODF2L;NAPB;PCID2;ZNF337;PRKAB2;ENOSF1;DCAF8;REV1;TRA2B;PGBD1;TTC13;ZNF514;CNOT9;CENPJ;TBRG1;PAXBP1;INTS6L;AGBL2;ZMAT1;CATSPER2;ZNF558;HNRNPH1;OTUD3;AHSA2;ZNF519;CCDC14;ARIH2;TRIM52;WDR27;PRPF39;ZNF75D;ZNF527;ACADSB;ZNF781;ZNF26;CRYGS;PPP3CB-AS1;LINC00342;ZNF37BP;LINC00987;AMY2B;POLG2;CEP95;RP11-690D19.3	0.0650599	-1.59952	0.00834846	0.0133091	-0.318683	0.740635	0.846235	NA	NA	NA	NA	NA	-0.128917	0.309985	-0.119292	0.347789	0.181854	0.150383	0.46434	0.63748	0.58782	0.4355	0.69268	0	0	0	0	0	hsa03040 (Spliceosome)	NA (NA)	R-HSA-6804115 (TP53 regulates transcription of additional cell cycle genes whose exact role in the p53 pathway remain uncertain)	WP1982 (Sterol Regulatory Element-Binding Proteins (SREBP) signalling)	GO:0006260 (DNA replication)
M:ME102	grey60	137	ENSG00000006459;ENSG00000006715;ENSG00000008086;ENSG00000008294;ENSG00000012048;ENSG00000014919;ENSG00000024048;ENSG00000029364;ENSG00000038219;ENSG00000048740;ENSG00000054118;ENSG00000064012;ENSG00000066084;ENSG00000066135;ENSG00000073910;ENSG00000077157;ENSG00000078142;ENSG00000082701;ENSG00000083223;ENSG00000084676;ENSG00000085433;ENSG00000089902;ENSG00000095139;ENSG00000099942;ENSG00000100485…	KDM7A;VPS41;CDKL5;SPAG9;BRCA1;COX15;UBR2;SLC39A9;BOD1L1;CELF2;THRAP3;CASP8;DIP2B;KDM4A;FRY;PPP1R12B;PIK3C3;GSK3B;ZCCHC6;NCOA1;WDR47;RCOR1;ARCN1;CRKL;SOS2;NIN;SPTLC2;PCNX1;SUPT20H;ZNF106;PIK3CG;DOCK8;FBXL20;CPD;AKAP10;RAPGEF2;CBL;NUP98;UHRF1BP1L;FAM65B;E2F3;ATP6V1A;WIPF1;KDM5B;KLF7;FOXO3;NEK6;KDM3B;APAF1;BAZ2B;ATXN1;MOSPD2;ZSWIM6;UBE4B;PPFIA1;SERINC3;SBF2;AGO4;AGTPBP1;SRPK2;KIAA0319;TAF8;FHDC1;FCH…	0.0630096	1.47247	0.00650759	0.0110128	-0.32985	0.611	0.772529	NA	NA	NA	NA	NA	0.107477	0.397931	0.0980341	0.4409	-0.120739	0.341932	0.14863	0.45384	0.19881	0.97204	0.22982	29	8	0	10	15	hsa05200 (Pathways in cancer)	P00033 (Insulin/IGF pathway-protein kinase B signaling cascade)	R-HSA-1989781 (PPARA activates gene expression)	WP4262 (Breast cancer pathway)	GO:0016358 (dendrite development)
M:ME19	salmon2	49	ENSG00000071575;ENSG00000099725;ENSG00000107611;ENSG00000120458;ENSG00000129167;ENSG00000136541;ENSG00000138821;ENSG00000144935;ENSG00000152763;ENSG00000164038;ENSG00000165322;ENSG00000166343;ENSG00000170074;ENSG00000175265;ENSG00000176953;ENSG00000188785;ENSG00000197857;ENSG00000197978;ENSG00000204149;ENSG00000205268;ENSG00000212127;ENSG00000222057;ENSG00000228393;ENSG00000230590;ENSG00000232593…	TRIB2;PRKY;CUBN;MSANTD2;TPH1;ERMN;SLC39A8;TRPC1;WDR78;SLC9B2;ARHGAP12;MSS51;FAM153A;GOLGA8A;NFATC2IP;ZNF548;ZNF44;GOLGA6L9;AGAP6;PDE7A;TAS2R14;RNU4-62P;LINC01004;FTX;KANTR;RP11-104L21.2;AC104820.2;LINC00861;RP11-549J18.1;RP11-890B15.3;TAS2R20;ZNF10;PWAR6;AC009120.6;RP11-747H7.3;KB-1460A1.5;LINC01355;RP11-214O1.3;CTC-444N24.11;RP11-348N5.7;RP3-368A4.6;CTD-2006H14.2;CTC-366B18.4;CTD-2035E11.5;RP5-1…	0.0620524	-1.59273	0.0102149	0.0158258	-0.289686	0.955289	0.964053	miR-124-3p	ENSG00000071575	-0.146	0.669	1	-0.205233	0.103764	-0.214408	0.0888851	0.0606448	0.63405	0.85628	0.27682	0.34065	0.27845	0.25384	1	0	0	0	0	hsa04742 (Taste transduction)	P00004 (Alzheimer disease-presenilin pathway)	R-HSA-382551 (Transport of small molecules)	WP3679 (Cell-type Dependent Selectivity of CCK2R Signaling)	GO:0009593 (detection of chemical stimulus)
M:ME10	salmon4	71	ENSG00000020922;ENSG00000029363;ENSG00000040341;ENSG00000065809;ENSG00000070367;ENSG00000077147;ENSG00000077458;ENSG00000085274;ENSG00000085365;ENSG00000086619;ENSG00000095574;ENSG00000100811;ENSG00000107560;ENSG00000108064;ENSG00000109171;ENSG00000110429;ENSG00000111790;ENSG00000116747;ENSG00000118620;ENSG00000119616;ENSG00000120063;ENSG00000121274;ENSG00000122042;ENSG00000122545;ENSG00000122741…	MRE11A;BCLAF1;STAU2;FAM107B;EXOC5;TM9SF3;FAM76B;MYNN;SCAMP1;ERO1B;IKZF5;YY1;RAB11FIP2;TFAM;SLAIN2;FBXO3;FGFR1OP2;TROVE2;ZNF430;FCF1;GNA13;PAPD5;UBL3;sept.7;DCAF10;SLC25A16;FAM199X;TWSG1;ARPP19;ZMYM5;IMPA1;PRPF38B;SLC38A2;CDC73;STK26;CD164;C2orf49;SKIL;PDCL;RB1;ABHD13;TWF1;MBNL1;MED21;GABPA;TYW5;RCHY1;DNAJB14;ABHD18;PGGT1B;GTF2A1;USP38;ZMAT3;DENND6A;C2orf69;SUZ12;SOCS4;MIGA1;ZDHHC20;TRAPPC6B;ACBD3…	0.0554477	-1.52155	0.0137374	0.0207002	-0.365457	0.167146	0.363324	NA	NA	NA	NA	NA	-0.0638204	0.616363	-0.0569874	0.654675	0.132409	0.296952	0.40678	0.072734	0.13557	0.34754	0.71964	0	0	0	0	0	hsa04115 (p53 signaling pathway)	P00023 (General transcription regulation)	R-HSA-264876 (Insulin processing)	WP2916 (Interactome of polycomb repressive complex 2 (PRC2))	GO:0007224 (smoothened signaling pathway)
M:ME9	bisque4	206	ENSG00000005812;ENSG00000008952;ENSG00000015153;ENSG00000021574;ENSG00000023572;ENSG00000036054;ENSG00000038274;ENSG00000043093;ENSG00000054219;ENSG00000054983;ENSG00000062194;ENSG00000062725;ENSG00000066427;ENSG00000068305;ENSG00000069345;ENSG00000070269;ENSG00000072401;ENSG00000075303;ENSG00000076053;ENSG00000077684;ENSG00000080371;ENSG00000081087;ENSG00000083896;ENSG00000084073;ENSG00000087338…	FBXL3;SEC62;YAF2;SPAST;GLRX2;TBC1D23;MAT2B;DCUN1D1;LY75;GALC;GPBP1;APPBP2;ATXN3;MEF2A;DNAJA2;TMEM260;UBE2D1;SLC25A40;RBM7;JADE1;RAB21;OSTM1;YTHDC1;ZMPSTE24;GMCL1;ALG6;SPTLC1;PAPOLA;USP48;OSBPL8;WAC;HNRNPH3;PPP4R3A;SRP54;METTL4;RIOK3;FMR1;CBLL1;FSD1L;ZFAND5;TRDMT1;MAPK8;SLC16A6;PRKAR1A;KLF3;KMT5B;BIRC2;RSRC2;CDKN1B;HINT3;C6orf62;HECA;TMEM30A;GOLPH3;GNB4;MOB1A;STXBP3;TSNAX;ZNF684;SLC19A2;DR1;STX12;…	0.0540541	NA	NA	NA	-0.342288	0.329165	0.513588	NA	NA	NA	NA	NA	0.0551059	0.665387	0.0522608	0.681713	0.118525	0.350921	0.43384	0.0042475	0.35277	0.42095	0.85817	0	0	0	0	0	hsa04141 (Protein processing in endoplasmic reticulum)	P00060 (Ubiquitin proteasome pathway)	R-HSA-8873719 (RAB geranylgeranylation)	WP4666 (Hepatitis B infection)	GO:0032259 (methylation)
M:ME49	mediumpurple1	35	ENSG00000000419;ENSG00000008324;ENSG00000059769;ENSG00000067064;ENSG00000100532;ENSG00000100632;ENSG00000106399;ENSG00000106615;ENSG00000109180;ENSG00000113387;ENSG00000113558;ENSG00000116030;ENSG00000116161;ENSG00000116752;ENSG00000121774;ENSG00000122565;ENSG00000131508;ENSG00000132432;ENSG00000133773;ENSG00000133997;ENSG00000137876;ENSG00000138668;ENSG00000144034;ENSG00000151332;ENSG00000153774…	DPM1;SS18L2;DNAJC25;IDI1;CGRRF1;ERH;RPA3;RHEB;OCIAD1;SUB1;SKP1;SUMO1;CACYBP;BCAS2;KHDRBS1;CBX3;UBE2D2;SEC61G;CCDC59;MED6;RSL24D1;HNRNPD;TPRKB;MBIP;CFDP1;TCEB1;MAGOH;PDIA3;PRKRA;SNRPE;SUMO2;PFDN6;ZBED5;LINC01003;LINC01578	0.0534083	1.36796	0.0821397	0.101521	-0.369927	0.288212	0.491147	NA	NA	NA	NA	NA	0.176198	0.163702	0.171988	0.174167	0.289959	0.0201188	0.15772	0.14576	0.13417	0.56045	0.78456	0	0	0	1	0	hsa04141 (Protein processing in endoplasmic reticulum)	P00059 (p53 pathway)	R-HSA-5696395 (Formation of Incision Complex in GG-NER)	WP410 (Exercise-induced Circadian Regulation)	GO:0008380 (RNA splicing)
M:ME81	floralwhite	81	ENSG00000059145;ENSG00000064932;ENSG00000068308;ENSG00000072609;ENSG00000076662;ENSG00000076984;ENSG00000078902;ENSG00000085872;ENSG00000089351;ENSG00000089693;ENSG00000090238;ENSG00000090316;ENSG00000091073;ENSG00000099866;ENSG00000100056;ENSG00000100299;ENSG00000101216;ENSG00000103510;ENSG00000104870;ENSG00000105229;ENSG00000105321;ENSG00000105327;ENSG00000105701;ENSG00000106348;ENSG00000108840…	UNKL;SBNO2;OTUD5;CHFR;ICAM3;MAP2K7;TOLLIP;CHERP;GRAMD1A;MLF2;YPEL3;MAEA;DTX2;MADCAM1;DGCR14;ARSA;GMEB2;KAT8;FCGRT;PIAS4;CCDC9;BBC3;FKBP8;IMPDH1;HDAC5;SLC22A18;HPCAL1;KIAA2013;ZBTB17;MAP7D1;ATP6V0B;PDLIM2;B9D2;COQ8B;TMEM115;SCAF1;POR;LRFN1;TST;TMEM8A;CBFA2T3;MLLT1;NINJ1;STARD3;RFX1;DCAF15;DBNL;HLX;VPS37B;CBX8;SH3GL1;SCYL1;RCN3;EFHD2;ADAM8;TRIM11;PRR14;DEDD2;SAFB;LRWD1;ZFPL1;CITED2;NAIF1;TRIM8;ANKR…	0.0495249	1.44949	0.0179524	0.0263302	-0.3542	0.216821	0.433643	miR-124-3p	ENSG00000104870	-0.649	0.84	1	0.156162	0.217856	0.129535	0.307652	-0.162779	0.198739	0.62226	0.92987	0.53172	0.52827	0.13852	0	0	0	0	0	hsa04620 (Toll-like receptor signaling pathway)	P00035 (Interferon-gamma signaling pathway)	R-HSA-3899300 (SUMOylation of transcription cofactors)	WP2637 (Structural Pathway of Interleukin 1 (IL-1))	GO:0052192 (movement in environment of other organism involved in symbiotic interaction)
M:ME67	antiquewhite2	44	ENSG00000008838;ENSG00000015532;ENSG00000079999;ENSG00000100324;ENSG00000100401;ENSG00000100994;ENSG00000101945;ENSG00000104812;ENSG00000105447;ENSG00000105726;ENSG00000107140;ENSG00000110108;ENSG00000117408;ENSG00000119777;ENSG00000125755;ENSG00000126215;ENSG00000127191;ENSG00000127616;ENSG00000130193;ENSG00000132153;ENSG00000136699;ENSG00000136878;ENSG00000137221;ENSG00000140553;ENSG00000141510…	MED24;XYLT2;KEAP1;TAB1;RANGAP1;PYGB;SUV39H1;GYS1;GRWD1;ATP13A1;TESK1;TMEM109;IPO13;TMEM214;SYMPK;XRCC3;TRAF2;SMARCA4;THEM6;DHX30;SMPD4;USP20;TJAP1;UNC45A;TP53;RPTOR;PFKL;TKFC;DHX37;FUK;CCAR2;IGSF8;EEF2;LETM1;SLC25A22;FARSA;KLHL25;sept.9;TRPV2;TMEM201;EHMT2;VARS;NUP62;HGH1	0.0485129	-1.50495	0.0225333	0.0320768	-0.337618	0.487514	0.646103	NA	NA	NA	NA	NA	-0.097524	0.443293	-0.106541	0.402076	-0.182002	0.150045	0.16555	0.73296	0.43701	0.83701	0.82867	0	0	0	1	0	hsa00051 (Fructose and mannose metabolism)	P00059 (p53 pathway)	R-HSA-71387 (Metabolism of carbohydrates)	WP1403 (AMP-activated Protein Kinase (AMPK) Signaling)	GO:0051291 (protein heterooligomerization)
M:ME92	lightpink3	47	ENSG00000013374;ENSG00000043462;ENSG00000055332;ENSG00000070190;ENSG00000078081;ENSG00000086065;ENSG00000088827;ENSG00000089127;ENSG00000107201;ENSG00000111331;ENSG00000115267;ENSG00000119917;ENSG00000119922;ENSG00000120280;ENSG00000121060;ENSG00000121236;ENSG00000121858;ENSG00000126262;ENSG00000132109;ENSG00000132256;ENSG00000134321;ENSG00000134326;ENSG00000135114;ENSG00000135148;ENSG00000135899…	NUB1;LCP2;EIF2AK2;DAPP1;LAMP3;CHMP5;SIGLEC1;OAS1;DDX58;OAS3;IFIH1;IFIT3;IFIT2;CXorf21;TRIM25;TRIM6;TNFSF10;FFAR2;TRIM21;TRIM5;RSAD2;CMPK2;OASL;TRAFD1;SP110;MRPL44;CALCOCO2;IL1RN;IFI44L;IFI44;HERC6;HERC5;ETV6;LYSMD2;ZCCHC2;IFIT5;PIK3AP1;MX1;IFI16;DTX3L;MLKL;MX2;USP18;IFIT1;TDRD7;IRF9;NRIR	0.0478185	1.4921	0.0230369	0.0320768	-0.372835	0.164292	0.363324	NA	NA	NA	NA	NA	0.188347	0.136104	0.218302	0.083102	-0.0547775	0.667264	0.55559	0.1117	0.19259	0.29456	0.55128	5	0	12	3	25	hsa05164 (Influenza A)	P00006 (Apoptosis signaling pathway)	R-HSA-913531 (Interferon Signaling)	WP4197 (The human immune response to tuberculosis)	GO:0098542 (defense response to other organism)
M:ME96	tan4	28	ENSG00000005339;ENSG00000065970;ENSG00000068650;ENSG00000092847;ENSG00000130779;ENSG00000134250;ENSG00000156030;ENSG00000160229;ENSG00000160584;ENSG00000166439;ENSG00000173120;ENSG00000176994;ENSG00000184863;ENSG00000187605;ENSG00000188167;ENSG00000188559;ENSG00000197724;ENSG00000198646;ENSG00000237094;ENSG00000238035;ENSG00000248476;ENSG00000251474;ENSG00000255423;ENSG00000262766;ENSG00000267632…	CREBBP;FOXJ2;ATP11A;AGO1;CLIP1;NOTCH2;ELMSAN1;ZNF66;SIK3;RNF169;KDM2A;SMCR8;RBM33;TET3;TMPPE;RALGAPA2;PHF2;NCOA6;RP4-669L17.10;AC138035.2;BACH1-IT1;RPL32P3;EBLN2;RP11-196G11.4;RP11-400F19.18;LINC01126;NPTN-IT1;RP11-482G13.1	0.0471355	1.49746	0.0246372	0.0338762	0.303823	0.255435	0.475675	NA	NA	NA	NA	NA	0.118906	0.349364	0.123364	0.331462	-0.156386	0.217187	0.3539	0.2596	0.39101	0.67579	0.12372	1	0	6	0	1	hsa04330 (Notch signaling pathway)	P00025 (Hedgehog signaling pathway)	R-HSA-1912408 (Pre-NOTCH Transcription and Translation)	WP268 (Notch Signaling)	GO:0070988 (demethylation)
M:ME52	thistle	50	ENSG00000029639;ENSG00000035141;ENSG00000053372;ENSG00000075914;ENSG00000081870;ENSG00000099901;ENSG00000100564;ENSG00000101247;ENSG00000102390;ENSG00000103121;ENSG00000105185;ENSG00000107672;ENSG00000111361;ENSG00000111786;ENSG00000114021;ENSG00000115875;ENSG00000120699;ENSG00000122034;ENSG00000123737;ENSG00000127922;ENSG00000128534;ENSG00000128951;ENSG00000131373;ENSG00000134453;ENSG00000136147…	TFB1M;FAM136A;MRTO4;EXOSC7;HSPB11;RANBP1;PIGH;NDUFAF5;PBDC1;CMC2;PDCD5;NSMCE4A;EIF2B1;SRSF9;NIT2;SRSF7;EXOSC8;GTF3A;EXOSC9;SHFM1;LSM8;DUT;HACL1;RBM17;PHF11;PPA2;NDUFA9;MRPL24;MRPS5;HIKESHI;RBM45;MITD1;CCDC107;POLR2H;PA2G4;ARV1;PTPN2;MRPL48;C8orf59;TRNAU1AP;METTL23;COA5;PSMG1;NR2C2AP;NDUFA12;RPS27L;NOL7;SCAMP1-AS1;PINX1;CNPY2	0.0428528	1.38645	0.0602595	0.077076	-0.407677	0.0390659	0.134289	miR-532-3p	ENSG00000111786	2.36	0.085	0.938966426305599	0.122965	0.33304	0.119582	0.346611	0.266719	0.033134	0.32633	0.18229	0.44064	0.89586	0.774	0	0	9	0	7	hsa03018 (RNA degradation)	P02739 (De novo pyrimidine deoxyribonucleotide biosynthesis)	R-HSA-429958 (mRNA decay by 3' to 5' exoribonuclease)	WP4352 (Ciliary landscape)	GO:0016072 (rRNA metabolic process)
M:ME54	thistle2	75	ENSG00000011260;ENSG00000014641;ENSG00000020426;ENSG00000023734;ENSG00000070785;ENSG00000074201;ENSG00000075188;ENSG00000087302;ENSG00000100028;ENSG00000102054;ENSG00000102317;ENSG00000105819;ENSG00000106028;ENSG00000107949;ENSG00000108010;ENSG00000112110;ENSG00000113845;ENSG00000114686;ENSG00000115233;ENSG00000115484;ENSG00000115539;ENSG00000117133;ENSG00000118939;ENSG00000119203;ENSG00000120437…	UTP18;MDH1;MNAT1;STRAP;EIF2B3;CLNS1A;NUP37;C14orf166;SNRPD3;RBBP7;RBM3;PMPCB;SSBP1;BCCIP;GLRX3;MRPL18;TIMMDC1;MRPL3;PSMD14;CCT4;PDCL3;RPF1;UCHL3;CPSF3;ACAT2;TCP1;ALG5;CCDC53;RRP36;DNAJC8;MTX2;PSMG2;ATXN10;C14orf1;TIMM17A;BZW2;NDUFB5;ATP6V1G1;APTX;TMEM14B;ESD;WDR61;EIF2A;EAF2;PYURF;BOD1;CCT6A;CETN2;POLE3;EIF3M;HAUS1;MRPL39;GTF3C6;DBI;NSMCE2;ALG8;PSMC2;TFB2M;CCT2;PDHB;TMEM126A;SLC25A33;MRPL13;NAA20…	0.0415549	1.41256	0.0313901	0.0426286	-0.311298	0.815648	0.88513	miR-320b/miR-124-3p	ENSG00000136888/ENSG00000136888	1.494/-0.572	0.191/0.816	1/1	0.130286	0.304831	0.143728	0.257192	0.206468	0.101656	0.43093	0.76232	0.69898	0.78817	0.68208	0	0	14	0	5	hsa00620 (Pyruvate metabolism)	P00013 (Cell cycle)	R-HSA-390450 (Folding of actin by CCT/TriC)	WP4753 (Nucleotide Excision Repair)	GO:0140053 (mitochondrial gene expression)
M:ME15	coral1	64	ENSG00000040275;ENSG00000056050;ENSG00000061794;ENSG00000064102;ENSG00000075239;ENSG00000079785;ENSG00000080608;ENSG00000081307;ENSG00000085231;ENSG00000085415;ENSG00000085760;ENSG00000089006;ENSG00000096872;ENSG00000102241;ENSG00000102931;ENSG00000104047;ENSG00000104231;ENSG00000104408;ENSG00000107625;ENSG00000107937;ENSG00000107951;ENSG00000108666;ENSG00000109775;ENSG00000111142;ENSG00000111845…	SPDL1;HPF1;MRPS35;ASUN;ACAT1;DDX1;PUM3;UBA5;AK6;SEH1L;MTIF2;SNX5;IFT74;HTATSF1;ARL2BP;DTWD1;ZFAND1;EIF3E;DDX50;GTPBP4;MTPAP;C17orf75;UFSP2;METAP2;PAK1IP1;RARS;NCBP2;NOL10;CEBPZ;FARSB;MPHOSPH10;GRSF1;UTP3;MTO1;PWP1;ACTL6A;FDX1;SSB;OLA1;WDR12;VWA9;COPS4;EBAG9;GUF1;NIFK;MTERF3;UTP15;PDSS2;SUGT1;HPRT1;BORCS7;LEO1;DNAJC21;TRIAP1;PLRG1;NOC3L;TOMM20;CSTF3;NAP1L1;NIF3L1;RPF2;ADH5;HIBCH;ZNF277	0.0332455	-1.35073	0.0515904	0.066764	-0.344717	0.432025	0.606739	NA	NA	NA	NA	NA	-0.10496	0.409138	-0.084325	0.50766	0.216386	0.085909	0.65319	0.53603	0.020216	0.31551	0.75124	1	0	0	1	8	hsa03008 (Ribosome biogenesis in eukaryotes)	P06959 (CCKR signaling map)	R-HSA-6790901 (rRNA modification in the nucleus and cytosol)	WP3925 (Amino Acid metabolism)	GO:0022613 (ribonucleoprotein complex biogenesis)
M:ME103	plum3	53	ENSG00000064419;ENSG00000069329;ENSG00000077514;ENSG00000079950;ENSG00000093000;ENSG00000096060;ENSG00000097033;ENSG00000105856;ENSG00000106829;ENSG00000108984;ENSG00000109466;ENSG00000112343;ENSG00000114030;ENSG00000116489;ENSG00000117153;ENSG00000117859;ENSG00000118518;ENSG00000118579;ENSG00000119392;ENSG00000123700;ENSG00000124214;ENSG00000125779;ENSG00000129083;ENSG00000130772;ENSG00000132801…	TNPO3;VPS35;POLD3;STX7;NUP50;FKBP5;SH3GLB1;HBP1;TLE4;MAP2K6;KLHL2;TRIM38;KPNA1;CAPZA1;KLHL12;OSBPL9;RNF146;MED28;GLE1;KCNJ2;STAU1;PANK2;COPB1;MED18;ZSWIM3;PPP1R3D;ARNTL;STX6;RNASEL;RCBTB2;WDR33;SLC40A1;APH1B;NPEPPS;IFNAR1;SNX27;FBXO38;BTBD10;FLI1;EYA3;IFNAR2;MPZL3;PCYT1A;SNIP1;SMG8;RNF34;EIF1AD;GPR141;DCAF12;TOP1;UBXN2B;RP11-290F24.6;KB-431C1.5	0	NA	NA	NA	-0.358434	0.24667	0.475675	NA	NA	NA	NA	NA	0.0922924	0.468245	0.0733131	0.564804	-0.117303	0.355946	0.12597	0.73338	0.55728	0.3028	0.25	1	0	0	0	0	hsa05164 (Influenza A)	P00001 (Adrenaline and noradrenaline biosynthesis)	R-HSA-913531 (Interferon Signaling)	WP585 (Interferon type I signaling pathways)	GO:0051169 (nuclear transport)
M:ME108	darkgrey	128	ENSG00000002726;ENSG00000003096;ENSG00000005187;ENSG00000005189;ENSG00000010278;ENSG00000014257;ENSG00000057294;ENSG00000062485;ENSG00000071242;ENSG00000072134;ENSG00000091181;ENSG00000092067;ENSG00000099377;ENSG00000100628;ENSG00000102145;ENSG00000103056;ENSG00000103319;ENSG00000103355;ENSG00000104312;ENSG00000105205;ENSG00000105366;ENSG00000107242;ENSG00000109099;ENSG00000112715;ENSG00000112759…	AOC1;KLHL13;ACSM3;AC004381.6;CD9;ACPP;PKP2;CS;RPS6KA2;EPN2;IL5RA;CEBPE;HSD3B7;ASB2;GATA1;SMPD3;EEF2K;PRSS33;RIPK2;CLC;SIGLEC8;PIP5K1B;PMP22;VEGFA;SLC29A1;ARSB;THBS4;HES1;IL1RL1;EPAS1;MTFR1L;MYCT1;CAT;TMIGD3;FAM124B;EFNB2;MGAT3;LRRC17;CACNG6;AKAP12;IDO1;KHDRBS3;CCNA1;LGALS12;CAMK1;MEIS2;CD101;HRH4;HILPDA;TEC;ENPP2;TRPC6;CDK15;SEMA7A;GALNT6;SORD;HDC;KSR1;CACNG8;LHFPL2;GFOD1;VLDLR;PLIN2;MS4A2;INPP1;…	0	-0.925629	0.658963	0.710646	-0.342723	0.331498	0.513588	miR-124-3p	ENSG00000104312	-1.107	0.945	1	-0.00284402	0.982206	0.0145787	0.908971	-0.0944356	0.457932	0.56867	0.83929	0.75258	0.084435	0.9281	0	0	4	2	4	hsa04080 (Neuroactive ligand-receptor interaction)	P04375 (5HT3 type receptor mediated signaling pathway)	R-HSA-373076 (Class A/1 (Rhodopsin-like receptors))	WP465 (Tryptophan metabolism)	GO:0035587 (purinergic receptor signaling pathway)
M:ME16	yellow	255	ENSG00000000457;ENSG00000006451;ENSG00000008282;ENSG00000009780;ENSG00000031691;ENSG00000038210;ENSG00000049449;ENSG00000053900;ENSG00000057663;ENSG00000065548;ENSG00000071243;ENSG00000072042;ENSG00000075089;ENSG00000075790;ENSG00000081154;ENSG00000083099;ENSG00000088448;ENSG00000088766;ENSG00000091009;ENSG00000094841;ENSG00000095209;ENSG00000100528;ENSG00000101266;ENSG00000101928;ENSG00000102471…	SCYL3;RALA;SYPL1;FAM76A;CENPQ;PI4K2B;RCN1;ANAPC4;ATG5;ZC3H15;ING3;RDH11;ACTR6;BCAP29;PCNP;LYRM2;ANKRD10;CRLS1;RBM27;UPRT;TMEM38B;CNIH1;CSNK2A1;MOSPD1;NDFIP2;CDADC1;CYB5B;EIF3J;LEPROTL1;GTPBP10;BET1;H2AFV;GAR1;ELP4;SC5D;PDHX;GTF2H1;PTGES3;CNOT2;GOLT1B;CMAS;FBXO5;SRSF3;CCNC;MRPS30;PPWD1;TRAPPC13;CRBN;FXR1;SNX4;COMMD2;MOB4;DARS;PLEKHA3;UCHL5;PPP1R8;RCN2;SPCS2;AKAP7;SET;CAAP1;TMPO;NFYB;RNF170;COIL;SM…	0	-1.19112	0.0489796	0.0641399	-0.328172	0.639448	0.785653	miR-124-3p	ENSG00000163607	-1.796	0.997	1	-0.0858744	0.499865	-0.0804019	0.527673	0.242495	0.0535269	0.94946	0.52395	0.40762	0.6669	0.61741	0	0	0	0	0	hsa04744 (Phototransduction)	P00060 (Ubiquitin proteasome pathway)	R-HSA-2162123 (Synthesis of Prostaglandins (PG) and Thromboxanes (TX))	WP4298 (Viral Acute Myocarditis)	GO:1901657 (glycosyl compound metabolic process)
M:ME17	firebrick3	32	ENSG00000067048;ENSG00000095564;ENSG00000107938;ENSG00000110172;ENSG00000110344;ENSG00000112739;ENSG00000114857;ENSG00000115524;ENSG00000119707;ENSG00000120616;ENSG00000131503;ENSG00000134444;ENSG00000135164;ENSG00000137776;ENSG00000145833;ENSG00000147162;ENSG00000147854;ENSG00000153914;ENSG00000162601;ENSG00000162613;ENSG00000163714;ENSG00000163781;ENSG00000164180;ENSG00000165195;ENSG00000165494…	DDX3Y;BTAF1;EDRF1;CHORDC1;UBE4A;PRPF4B;NKTR;SF3B1;RBM25;EPC1;ANKHD1;KIAA1468;DMTF1;SLTM;DDX46;OGT;UHRF2;SREK1;MYSM1;FUBP1;U2SURP;TOPBP1;TMEM161B;PIGA;PCF11;FAM111A;EPM2AIP1;LRRC37B;RNPC3;ZNF655;RP11-488L18.4;TUG1	0	NA	NA	NA	0.337925	0.0723751	0.209507	NA	NA	NA	NA	NA	0.0522429	0.681816	0.0663778	0.602275	0.103857	0.414105	0.91615	0.46535	0.59379	0.39771	0.47961	1	0	3	0	2	hsa03040 (Spliceosome)	NA (NA)	R-HSA-72172 (mRNA Splicing)	WP411 (mRNA Processing)	GO:0006397 (mRNA processing)
M:ME28	thistle4	29	ENSG00000028310;ENSG00000044090;ENSG00000094631;ENSG00000100023;ENSG00000103051;ENSG00000104365;ENSG00000113716;ENSG00000115282;ENSG00000119723;ENSG00000125434;ENSG00000128928;ENSG00000135473;ENSG00000136811;ENSG00000140326;ENSG00000155229;ENSG00000160285;ENSG00000160695;ENSG00000162231;ENSG00000163161;ENSG00000163482;ENSG00000165282;ENSG00000167333;ENSG00000170037;ENSG00000177084;ENSG00000198917…	BRD9;CUL7;HDAC6;PPIL2;COG4;IKBKB;HMGXB3;TTC31;COQ6;SLC25A35;IVD;PAN2;ODF2;CDAN1;MMS19;LSS;VPS11;NXF1;ERCC3;STK36;PIGO;TRIM68;CNTROB;POLE;SPOUT1;AP1G2;VPS52;LINC01278;STAG3L5P	0	-1.36845	0.0814023	0.101521	-0.31741	0.758372	0.851233	NA	NA	NA	NA	NA	-0.103055	0.41774	-0.103866	0.414064	-0.108907	0.391647	0.15534	0.89189	0.75387	0.94091	0.23397	0	0	0	0	0	hsa03420 (Nucleotide excision repair)	P00014 (Cholesterol biosynthesis)	R-HSA-5696400 (Dual Incision in GG-NER)	WP4753 (Nucleotide Excision Repair)	GO:0006289 (nucleotide-excision repair)
M:ME4	green4	25	ENSG00000018510;ENSG00000086827;ENSG00000104205;ENSG00000106560;ENSG00000111269;ENSG00000114904;ENSG00000115159;ENSG00000115364;ENSG00000117528;ENSG00000124207;ENSG00000134001;ENSG00000137364;ENSG00000139117;ENSG00000146143;ENSG00000148835;ENSG00000154059;ENSG00000163002;ENSG00000172469;ENSG00000177058;ENSG00000179630;ENSG00000180329;ENSG00000185238;ENSG00000188725;ENSG00000196678;ENSG00000197713	AGPS;ZW10;SGK3;GIMAP2;CREBL2;NEK4;GPD2;MRPL19;ABCD3;CSE1L;EIF2S1;TPMT;CPNE8;PRIM2;TAF5;IMPACT;NUP35;MANEA;SLC38A9;LACC1;CCDC43;PRMT3;SMIM15;ERI2;RPE	0	-1.22047	0.18961	0.22427	-0.348385	0.487171	0.646103	NA	NA	NA	NA	NA	-0.103008	0.417952	-0.0808694	0.525268	0.10599	0.40453	0.90426	0.060275	0.076732	0.26892	0.82054	0	0	0	0	0	hsa04146 (Peroxisome)	P00006 (Apoptosis signaling pathway)	R-HSA-2672351 (Stimuli-sensing channels)	WP299 (Nuclear Receptors in Lipid Metabolism and Toxicity)	GO:0007031 (peroxisome organization)
M:ME43	plum4	29	ENSG00000007392;ENSG00000037042;ENSG00000074582;ENSG00000101442;ENSG00000108773;ENSG00000130826;ENSG00000131067;ENSG00000132635;ENSG00000135469;ENSG00000136444;ENSG00000140474;ENSG00000148399;ENSG00000151353;ENSG00000157992;ENSG00000159899;ENSG00000165724;ENSG00000167272;ENSG00000167699;ENSG00000168395;ENSG00000174080;ENSG00000198169;ENSG00000231584;ENSG00000237489;ENSG00000256271;ENSG00000258352…	LUC7L;TUBG2;BCS1L;ACTR5;KAT2A;DKC1;GGT7;PCED1A;COQ10A;RSAD1;ULK3;DPH7;TMEM18;KRTCAP3;NPR2;ZMYND19;POP5;GLOD4;ING5;CTSF;ZNF251;FAHD2CP;LINC00959;CACNA1C-AS2;RP11-23J18.1;MIR762HG;RP5-882C2.2;CTC-448F2.6;RP3-508I15.20	0	-1.48171	0.040107	0.0531538	-0.330738	0.668109	0.795289	NA	NA	NA	NA	NA	-0.177546	0.160452	-0.178359	0.158514	0.141261	0.265531	0.44448	0.68721	0.13823	0.12042	0.83514	0	0	0	0	0	hsa03008 (Ribosome biogenesis in eukaryotes)	NA (NA)	R-HSA-3214847 (HATs acetylate histones)	WP4767 (FGFR3 signalling in chondrocyte proliferation and terminal differentiation)	GO:0051188 (cofactor biosynthetic process)
M:ME53	blue4	30	ENSG00000082515;ENSG00000089248;ENSG00000100209;ENSG00000100216;ENSG00000100387;ENSG00000105393;ENSG00000111481;ENSG00000111639;ENSG00000113068;ENSG00000113734;ENSG00000114125;ENSG00000116288;ENSG00000116459;ENSG00000124562;ENSG00000134330;ENSG00000143222;ENSG00000143575;ENSG00000149600;ENSG00000154518;ENSG00000164258;ENSG00000165629;ENSG00000165775;ENSG00000166136;ENSG00000169021;ENSG00000170310…	MRPL22;ERP29;HSCB;TOMM22;RBX1;BABAM1;COPZ1;MRPL51;PFDN1;BNIP1;RNF7;PARK7;ATP5F1;SNRPC;IAH1;UFC1;HAX1;COMMD7;ATP5G3;NDUFS4;ATP5C1;FUNDC2;NDUFB8;UQCRFS1;STX8;PPIH;COPS9;COA4;NDUFA6;RP11-629O1.2	0	1.30193	0.125579	0.150149	-0.308759	0.836754	0.89362	miR-124-3p	ENSG00000170310	0.344	0.492	1	0.164062	0.195174	0.157702	0.213294	0.130252	0.30496	0.80913	0.48808	0.28415	0.59835	0.31803	6	0	8	4	9	hsa05012 (Parkinson disease)	NA (NA)	R-HSA-163200 (Respiratory electron transport, ATP synthesis by chemiosmotic coupling, and heat production by uncoupling proteins.)	WP111 (Electron Transport Chain (OXPHOS system in mitochondria))	GO:0009141 (nucleoside triphosphate metabolic process)
M:ME58	green	227	ENSG00000006194;ENSG00000008988;ENSG00000010219;ENSG00000013392;ENSG00000070081;ENSG00000070761;ENSG00000071082;ENSG00000081721;ENSG00000083807;ENSG00000089009;ENSG00000089157;ENSG00000089220;ENSG00000090263;ENSG00000100575;ENSG00000100814;ENSG00000101546;ENSG00000102760;ENSG00000104979;ENSG00000105193;ENSG00000105202;ENSG00000105640;ENSG00000107014;ENSG00000107833;ENSG00000108298;ENSG00000108559…	ZNF263;RPS20;DYRK4;RWDD2A;NUCB2;CFAP20;RPL31;DUSP12;SLC27A5;RPL6;RPLP0;PEBP1;MRPS33;TIMM9;CCNB1IP1;RBFA;RGCC;C19orf53;RPS16;FBL;RPL18A;RLN2;NPM3;RPL19;NUP88;C1QBP;RPL34;RPS13;LDHB;SAYSD1;RPS12;FAM162A;RPL24;ABHD14B;EEF1B2;GPX7;RPL22;DPH5;RPS25;TMEM5;HDHD3;POLR3GL;RPL5;RNF113A;RPL23;SNRPD2;PDCD2L;UXT;COX7C;SPINK2;SNRPN;NGDN;RPS4Y1;RPL36;RPL27;RAN;NXT1;DAP3;TPT1;BEX2;MED10;RPS15A;ANP32B;RPL35;TMEM2…	0	-1.01008	0.409336	0.459458	-0.36907	0.0447342	0.149114	NA	NA	NA	NA	NA	-0.0279209	0.826644	-0.0339467	0.79001	0.174173	0.168678	0.97072	0.20098	0.6151	0.070039	0.64895	1	0	31	1	12	hsa03010 (Ribosome)	P02738 (De novo purine biosynthesis)	R-HSA-422475 (Axon guidance)	WP477 (Cytoplasmic Ribosomal Proteins)	GO:0022613 (ribonucleoprotein complex biogenesis)
M:ME60	lightsteelblue	56	ENSG00000007255;ENSG00000053501;ENSG00000059915;ENSG00000063177;ENSG00000072163;ENSG00000079462;ENSG00000083845;ENSG00000090971;ENSG00000092621;ENSG00000100353;ENSG00000100600;ENSG00000101400;ENSG00000104529;ENSG00000105372;ENSG00000106105;ENSG00000106211;ENSG00000106628;ENSG00000108107;ENSG00000109107;ENSG00000111678;ENSG00000112514;ENSG00000116353;ENSG00000130005;ENSG00000137309;ENSG00000137764…	TRAPPC6A;USE1;PSD;RPL18;LIMS2;PAFAH1B3;RPS5;NAT14;PHGDH;EIF3D;LGMN;SNTA1;EEF1D;RPS19;GARS;HSPB1;POLD2;RPL28;ALDOC;C12orf57;CUTA;MECR;GAMT;HMGA1;MAP2K5;RPLP1;MMAB;RPS2;RPS11;NOSIP;RPL7A;PGAP2;B3GAT3;CHCHD6;GRASP;RPL29;SMPD1;C19orf48;PRDX2;ATP6V0E2;HRAS;LINC00476;ZNF48;HMCES;TOP1MT;EEF1A1P5;C6orf48;GNL1;RACK1;RPL18AP3;TPT1P9;RP11-425L10.1;TRIM52-AS1;PXN-AS1;SNHG25;MMP28	0	-0.772338	0.91584	0.959451	-0.399417	0.0271938	0.103149	NA	NA	NA	NA	NA	-0.00151563	0.990517	-0.00855125	0.946532	-0.00328248	0.979463	0.35401	0.35612	0.077345	0.85378	0.29566	1	0	31	1	7	hsa03010 (Ribosome)	P00056 (VEGF signaling pathway)	R-HSA-156842 (Eukaryotic Translation Elongation)	WP477 (Cytoplasmic Ribosomal Proteins)	GO:0006413 (translational initiation)
M:ME61	darkseagreen3	45	ENSG00000064201;ENSG00000079616;ENSG00000100360;ENSG00000100416;ENSG00000100445;ENSG00000103227;ENSG00000104907;ENSG00000104964;ENSG00000105519;ENSG00000106133;ENSG00000116455;ENSG00000132600;ENSG00000133316;ENSG00000136877;ENSG00000141295;ENSG00000148308;ENSG00000148341;ENSG00000149809;ENSG00000154832;ENSG00000156521;ENSG00000160072;ENSG00000162572;ENSG00000165689;ENSG00000165802;ENSG00000167113…	TSPAN32;KIF22;IFT27;TRMU;SDR39U1;LMF1;TRMT1;AES;CAPS;NSUN5P2;WDR77;PRMT7;WDR74;FPGS;SCRN2;GTF3C5;SH3GLB2;TM7SF2;CXXC1;TYSND1;ATAD3B;SCNN1D;SDCCAG3;NSMF;COQ4;KIFC2;ANKS3;TMEM134;PUS1;MAMDC4;DMAP1;P4HTM;D2HGDH;ACBD4;KLHL17;STMN3;SNHG12;DXO;CDPF1;QTRT1;HAUS7;IFRD2;EPB41L4A-AS1;ACBD6;RP13-977J11.2	0	NA	NA	NA	-0.385286	0.0767384	0.216442	NA	NA	NA	NA	NA	-0.00724991	0.954659	-0.0130897	0.918234	0.0390184	0.759519	0.8503	0.89604	0.74936	0.57839	0.24843	0	0	0	0	0	hsa00100 (Steroid biosynthesis)	P00057 (Wnt signaling pathway)	R-HSA-72306 (tRNA processing)	WP4584 (Biomarkers for pyrimidine metabolism disorders)	GO:0006399 (tRNA metabolic process)
M:ME63	navajowhite	27	ENSG00000038358;ENSG00000038532;ENSG00000068354;ENSG00000077235;ENSG00000087274;ENSG00000100242;ENSG00000106290;ENSG00000107021;ENSG00000112659;ENSG00000114867;ENSG00000124574;ENSG00000136807;ENSG00000137497;ENSG00000139725;ENSG00000140521;ENSG00000141503;ENSG00000154222;ENSG00000159792;ENSG00000168066;ENSG00000168488;ENSG00000176087;ENSG00000177728;ENSG00000186716;ENSG00000196235;ENSG00000196924…	EDC4;CLEC16A;TBC1D25;GTF3C1;ADD1;SUN2;TAF6;TBC1D13;CUL9;EIF4G1;ABCC10;CDK9;NUMA1;RHOF;POLG;MINK1;CC2D1B;PSKH1;SF1;ATXN2L;SLC35A4;TMEM94;BCR;SUPT5H;FLNA;ZNF335;DENND1C	0	-1.30337	0.122838	0.148485	-0.413186	0.0200491	0.0816813	NA	NA	NA	NA	NA	-0.0879652	0.489444	-0.0927506	0.46603	-0.213817	0.0897908	0.66853	0.79655	0.33809	0.77913	0.14917	0	0	0	0	0	hsa02010 (ABC transporters)	P00023 (General transcription regulation)	R-HSA-167172 (Transcription of the HIV genome)	WP3414 (Initiation of transcription and translation elongation at the HIV-1 LTR)	GO:0098781 (ncRNA transcription)
M:ME65	orangered3	57	ENSG00000014164;ENSG00000031823;ENSG00000061938;ENSG00000065000;ENSG00000069424;ENSG00000074370;ENSG00000076928;ENSG00000077044;ENSG00000079432;ENSG00000080845;ENSG00000083812;ENSG00000099917;ENSG00000099991;ENSG00000100926;ENSG00000103126;ENSG00000103197;ENSG00000105063;ENSG00000105323;ENSG00000105325;ENSG00000106683;ENSG00000110697;ENSG00000112033;ENSG00000122678;ENSG00000127511;ENSG00000129667…	ZC3H3;RANBP3;TNK2;AP3D1;KCNAB2;ATP2A3;ARHGEF1;DGKD;CIC;DLGAP4;ZNF324;MED15;CABIN1;TM9SF1;AXIN1;TSC2;PPP6R1;HNRNPUL1;FZR1;LIMK1;PITPNM1;PPARD;POLM;SIN3B;RHBDF2;HELZ2;CASZ1;TRAF7;CC2D1A;CCDC142;MAPK8IP3;PML;CCDC97;TRIM41;FAM193B;GIGYF1;MEGF6;TEPSIN;PRSS27;SLC16A13;GAK;EHMT1;ZNF707;C19orf71;HGS;POFUT2;IFT140;NDOR1;PCNX3;MAFK;DENND4B;TECPR1;NEURL4;RP11-274B21.4;RP11-274B21.3;PTOV1-AS2;RP11-291L22.9	0	NA	NA	NA	-0.355936	0.172577	0.365066	NA	NA	NA	NA	NA	0.0278697	0.826957	0.0195335	0.878238	-0.236738	0.0596394	0.11512	0.097138	0.86999	0.37847	0.32276	0	0	0	1	0	hsa05221 (Acute myeloid leukemia)	P00016 (Cytoskeletal regulation by Rho GTPase)	R-HSA-400206 (Regulation of lipid metabolism by Peroxisome proliferator-activated receptor alpha (PPARalpha))	WP524 (G13 Signaling Pathway)	GO:0048009 (insulin-like growth factor receptor signaling pathway)
M:ME68	darkseagreen2	21	ENSG00000005882;ENSG00000007923;ENSG00000065029;ENSG00000073578;ENSG00000108591;ENSG00000108963;ENSG00000111667;ENSG00000115042;ENSG00000115204;ENSG00000122965;ENSG00000124608;ENSG00000132382;ENSG00000132768;ENSG00000132781;ENSG00000136059;ENSG00000136270;ENSG00000140688;ENSG00000148337;ENSG00000157593;ENSG00000158850;ENSG00000173456	PDK2;DNAJC11;ZNF76;SDHA;DRG2;DPH1;USP5;FAHD2A;MPV17;RBM19;AARS2;MYBBP1A;DPH2;MUTYH;VILL;TBRG4;C16orf58;CIZ1;SLC35B2;B4GALT3;RNF26	0	NA	NA	NA	-0.32738	0.672381	0.795289	NA	NA	NA	NA	NA	-0.0209731	0.869341	-0.0145177	0.90935	-0.0461292	0.717387	0.87018	0.70127	0.56813	0.38427	0.56558	0	0	0	0	0	hsa00533 (Glycosaminoglycan biosynthesis)	NA (NA)	R-HSA-163841 (Gamma carboxylation, hypusine formation and arylsulfatase activation)	WP2453 (TCA Cycle and Deficiency of Pyruvate Dehydrogenase complex (PDHc))	GO:0000959 (mitochondrial RNA metabolic process)
M:ME7	ivory	81	ENSG00000011114;ENSG00000033030;ENSG00000047346;ENSG00000071073;ENSG00000076641;ENSG00000080298;ENSG00000087301;ENSG00000101745;ENSG00000101752;ENSG00000102786;ENSG00000106799;ENSG00000107864;ENSG00000109670;ENSG00000110075;ENSG00000114302;ENSG00000114933;ENSG00000116406;ENSG00000117625;ENSG00000121741;ENSG00000124222;ENSG00000126070;ENSG00000127483;ENSG00000131375;ENSG00000132356;ENSG00000133704…	BTBD7;ZCCHC8;FAM214A;MGAT4A;PAG1;RFX3;TXNDC16;ANKRD12;MIB1;INTS6;TGFBR1;CPEB3;FBXW7;PPP6R3;PRKAR2A;INO80D;EDEM3;RCOR3;ZMYM2;STX16;AGO3;HP1BP3;CAPN7;PRKAA1;IPO8;DYNC1LI2;RNF38;ANKRD42;RP5-862P8.2;UBR3;LPP;MARCH6;PHIP;WHSC1L1;FAM188A;HERC4;CCDC82;SLX4IP;MPP7;SLC2A13;PAN3;OTULIN;TAB3;UBN2;KIAA1841;SPDYA;ARL5B;HOOK3;SNTB2;ZBTB21;CXorf23;ZNF791;C20orf197;RPS6KA3;ZNF518B;ZNF708;ZBTB37;CCDC30;GNG2;ZNF62…	0	NA	NA	NA	-0.352363	0.272432	0.475675	NA	NA	NA	NA	NA	-0.0364636	0.774836	-0.0356011	0.780027	0.0177306	0.889403	0.81056	0.61096	0.71328	0.45094	0.78469	0	0	0	0	0	hsa04914 (Progesterone-mediated oocyte maturation)	P04386 (Histamine H2 receptor mediated signaling pathway)	R-HSA-163359 (Glucagon signaling in metabolic regulation)	WP3965 (Lipid Metabolism Pathway)	GO:0032147 (activation of protein kinase activity)
M:ME78	yellowgreen	97	ENSG00000008382;ENSG00000023191;ENSG00000025770;ENSG00000049656;ENSG00000053371;ENSG00000065057;ENSG00000070404;ENSG00000077312;ENSG00000077348;ENSG00000090273;ENSG00000095059;ENSG00000099797;ENSG00000099800;ENSG00000099899;ENSG00000100379;ENSG00000100997;ENSG00000101997;ENSG00000103174;ENSG00000104679;ENSG00000104823;ENSG00000104884;ENSG00000104976;ENSG00000104980;ENSG00000105135;ENSG00000105258…	MPND;RNH1;NCAPH2;CLPTM1L;AKR7A2;NTHL1;FSTL3;SNRPA;EXOSC5;NUDC;DHPS;TECR;TIMM13;TRMT2A;KCTD17;ABHD12;CCDC22;NAGPA;R3HCC1;ECH1;ERCC2;SNAPC2;TIMM44;ILVBL;POLR2I;BCAT2;GCDH;PRPF31;DDX49;ETHE1;PSMD3;MRPL2;STK25;MRPL37;SCAMP3;SRM;MRPS2;DDX39A;PEPD;MT2A;ECSIT;TOMM40;TRIM28;EIF3G;THOC6;ARFIP2;EEFSEC;FAM127A;GRHPR;TARBP2;PEX14;SNAP47;RMND5B;HIGD2A;MDH2;PTGES2;C11orf49;TXNDC11;TSR2;SLC2A6;RUSC1;U2AF1L4;JMJ…	0	NA	NA	NA	-0.383445	0.0229316	0.0900885	NA	NA	NA	NA	NA	0.115426	0.363746	0.10341	0.416128	-0.0403929	0.751316	0.53149	0.86701	0.84066	0.28968	0.76689	0	0	0	0	0	hsa00270 (Cysteine and methionine metabolism)	P02746 (Heme biosynthesis)	R-HSA-9609507 (Protein localization)	WP497 (Urea cycle and metabolism of amino groups)	GO:0022613 (ribonucleoprotein complex biogenesis)
M:ME94	sienna3	101	ENSG00000006530;ENSG00000006744;ENSG00000007968;ENSG00000035499;ENSG00000051341;ENSG00000065328;ENSG00000066279;ENSG00000071539;ENSG00000072571;ENSG00000073111;ENSG00000075218;ENSG00000076382;ENSG00000077152;ENSG00000085840;ENSG00000087586;ENSG00000088325;ENSG00000089685;ENSG00000090889;ENSG00000091651;ENSG00000092853;ENSG00000093009;ENSG00000094804;ENSG00000100479;ENSG00000101057;ENSG00000104738…	AGK;ELAC2;E2F2;DEPDC1B;POLQ;MCM10;ASPM;TRIP13;HMMR;MCM2;GTSE1;SPAG5;UBE2T;ORC1;AURKA;TPX2;BIRC5;KIF4A;ORC6;CLSPN;CDC45;CDC6;POLE2;MYBL2;MCM4;CCNE1;NCAPG;FOXM1;RAD51AP1;CDCA3;TTK;KIF20A;CDC20;NEK2;CENPF;KIF14;NCAPH;KIF18A;ZWINT;CIT;STIL;HJURP;DLGAP5;E2F8;AAR2;GINS2;TOP2A;PCNA;CCNB1;ESPL1;ARHGEF39;NUSAP1;KNL1;KIF11;CEP55;CENPE;PIF1;FANCI;PLK4;KIF2C;NUF2;DTL;CDCA7;CCNA2;CDCA5;MKI67;CHEK1;SKA1;PDIA4;…	0	NA	NA	NA	-0.326463	0.642807	0.785653	NA	NA	NA	NA	NA	-0.0314579	0.80509	-0.0279211	0.826643	0.0557271	0.661843	0.64291	0.65812	0.43942	0.98101	0.88793	9	1	93	12	53	hsa04110 (Cell cycle)	P00059 (p53 pathway)	R-HSA-69278 (Cell Cycle, Mitotic)	WP179 (Cell Cycle)	GO:0044772 (mitotic cell cycle phase transition)
M:ME97	darkviolet	53	ENSG00000007202;ENSG00000054965;ENSG00000072121;ENSG00000072501;ENSG00000074755;ENSG00000075151;ENSG00000075568;ENSG00000100813;ENSG00000100888;ENSG00000101407;ENSG00000107862;ENSG00000109111;ENSG00000111642;ENSG00000115207;ENSG00000125107;ENSG00000125633;ENSG00000127481;ENSG00000129566;ENSG00000130119;ENSG00000131473;ENSG00000133226;ENSG00000136504;ENSG00000136813;ENSG00000139613;ENSG00000143569…	KIAA0100;FAM168A;ZFYVE26;SMC1A;ZZEF1;EIF4G3;TMEM131;ACIN1;CHD8;TTI1;GBF1;SUPT6H;CHD4;GTF3C2;CNOT1;CCDC93;UBR4;TEP1;GNL3L;ACLY;SRRM1;KAT7;KIAA0368;SMARCC2;UBAP2L;CIAO1;SNRNP200;SEC16A;UBE3B;EPG5;MIA3;YEATS2;SRRM2;NFRKB;PHF8;RNF213;PRPF8;SEC24C;KLHL11;POLR2A;MED12;ANKFY1;POMK;PIK3R4;MYO18A;SZT2;PI4KA;RP11-274B21.14;RP11-274B21.2;MSNP1;RP11-582J16.5;CTB-133G6.1;ENSG00000284828	0	NA	NA	NA	-0.303134	0.895842	0.942553	NA	NA	NA	NA	NA	-0.0497313	0.696351	-0.0464428	0.715547	-0.196562	0.119534	0.83806	0.61869	0.87182	0.68557	0.74441	0	0	0	0	0	hsa03040 (Spliceosome)	P00060 (Ubiquitin proteasome pathway)	R-HSA-72163 (mRNA Splicing - Major Pathway)	WP411 (mRNA Processing)	GO:0048193 (Golgi vesicle transport)
M:ME98	tan	151	ENSG00000001167;ENSG00000025800;ENSG00000049249;ENSG00000055609;ENSG00000060237;ENSG00000065526;ENSG00000066777;ENSG00000067900;ENSG00000073614;ENSG00000074356;ENSG00000074706;ENSG00000076108;ENSG00000076351;ENSG00000083168;ENSG00000084112;ENSG00000088888;ENSG00000095951;ENSG00000096070;ENSG00000100201;ENSG00000100207;ENSG00000100354;ENSG00000100393;ENSG00000100697;ENSG00000101109;ENSG00000101577…	NFYA;KPNA6;TNFRSF9;KMT2C;WNK1;SPEN;ARFGEF1;ROCK1;KDM5A;NCBP3;IPCEF1;BAZ2A;SLC46A1;KAT6A;SSH1;MAVS;HIVEP1;BRPF3;DDX17;TCF20;TNRC6B;EP300;DICER1;STK4;LPIN2;CTCF;SLC38A7;CASP2;SETX;MTMR4;ZBTB16;MLEC;DUSP16;KCTD20;FAM120B;GLTSCR1L;FAF2;CSNK1A1;TCEANC2;PRDM2;KIF21B;ARID1A;ARMC2;NRDE2;KANSL1;SNX19;COPA;MED13L;NCKAP1L;NCOA3;USP9X;TRERF1;NUP153;TMOD2;XPO7;PER2;AP3B1;DSTYK;BHLHE40;KIDINS220;APC;ALPK3;DCAF…	0	NA	NA	NA	-0.337618	0.435749	0.606739	NA	NA	NA	NA	NA	-0.0400317	0.753469	-0.0377665	0.767014	-0.179409	0.156038	0.32441	0.86374	0.089183	0.54462	0.74281	1	0	12	6	12	hsa04919 (Thyroid hormone signaling pathway)	P06959 (CCKR signaling map)	R-HSA-8936459 (RUNX1 regulates genes involved in megakaryocyte differentiation and platelet function)	WP3658 (Wnt/beta-catenin Signaling Pathway in Leukemia)	GO:0040029 (regulation of gene expression, epigenetic)
