# Supplementary material for: Sex-specific and multiomic integration enhance accuracy of peripheral blood biomarkers of major depressive disorder
Source: Research Square preprint supplement (doi:10.21203/rs.3.rs-3978037/v1), 2024-02-23
Supplement: Supplementary file 7 [file d1165c9c5075f27095da7544.xlsx]

## Sheet: N
		miRNA mRNA & DNAm			mRNA & DNAm		mRNA	miRNA	DNAm
		miRNA	mRNA	DNAm	mRNA	DNAm	mRNA	miRNA	DNAm
Female	JIVE	1	191	124	206	85	195	NA	NA
	RGCCA	28	198	132	301	493	347	NA	NA
Male	JIVE	1	198	0	137	0	NA	NA	NA
	RGCCA	0	438	229	0	0	NA	NA	NA
Pooled	JIVE	1	124	0	114	0	NA	NA	NA
	RGCCA	0	0	0	0	0	NA	NA	NA
NA: features stability not tested

## Sheet: mRNA
ID	Symbol	N	JIVE						RGCCA
			Pooled		Male		Female		Male	Female
			miRNAmRNADNAm	mRNADNAm	miRNAmRNADNAm	mRNADNAm	miRNAmRNADNAm	mRNADNAm	miRNAmRNADNAm	miRNAmRNADNAm	mRNADNAm
ENSG00000204482	LST1	9			Yes	Yes	Yes	Yes	Yes	Yes	Yes
ENSG00000073756	PTGS2	8	Yes	Yes			Yes	Yes		Yes	Yes
ENSG00000101413	RPRD1B	8	Yes	Yes			Yes	Yes		Yes	Yes
ENSG00000108733	PEX12	8	Yes	Yes			Yes	Yes		Yes	Yes
ENSG00000123689	G0S2	8	Yes	Yes			Yes	Yes		Yes	Yes
ENSG00000125245	GPR18	8	Yes	Yes			Yes	Yes		Yes	Yes
ENSG00000130772	MED18	8	Yes	Yes			Yes	Yes		Yes	Yes
ENSG00000133574	GIMAP4	8	Yes	Yes			Yes	Yes		Yes	Yes
ENSG00000142396	ERVK3-1	8	Yes	Yes			Yes	Yes		Yes	Yes
ENSG00000144655	CSRNP1	8	Yes	Yes			Yes	Yes		Yes	Yes
ENSG00000160321	ZNF208	8	Yes	Yes			Yes	Yes		Yes	Yes
ENSG00000161960	EIF4A1	8	Yes	Yes			Yes	Yes		Yes	Yes
ENSG00000163660	CCNL1	8	Yes	Yes			Yes	Yes		Yes	Yes
ENSG00000166333	ILK	8	Yes	Yes			Yes	Yes		Yes	Yes
ENSG00000173334	TRIB1	8	Yes	Yes			Yes	Yes		Yes	Yes
ENSG00000178127	NDUFV2	8	Yes	Yes			Yes	Yes		Yes	Yes
ENSG00000179388	EGR3	8	Yes	Yes			Yes	Yes		Yes	Yes
ENSG00000185946	RNPC3	8	Yes	Yes			Yes	Yes		Yes	Yes
ENSG00000186354	C9orf47	8	Yes	Yes			Yes	Yes		Yes	Yes
ENSG00000228363	AC015971.1	8	Yes	Yes			Yes	Yes		Yes	Yes
ENSG00000242338	BMS1P4	8	Yes	Yes			Yes	Yes		Yes	Yes
ENSG00000255423	EBLN2	8	Yes	Yes			Yes	Yes		Yes	Yes
ENSG00000258441	LINC00641	8	Yes	Yes			Yes	Yes		Yes	Yes
ENSG00000261026	AC105046.1	8	Yes	Yes			Yes	Yes		Yes	Yes
ENSG00000261468	AC096921.2	8	Yes	Yes			Yes	Yes		Yes	Yes
ENSG00000269688	AC008982.2	8	Yes	Yes			Yes	Yes		Yes	Yes
ENSG00000274008	RF00017	8	Yes	Yes			Yes	Yes		Yes	Yes
ENSG00000279838	AL356273.3	8	Yes	Yes			Yes	Yes		Yes	Yes
ENSG00000118369	USP35	7	Yes				Yes	Yes		Yes	Yes
ENSG00000129197	RPAIN	7		Yes			Yes	Yes		Yes	Yes
ENSG00000146414	SHPRH	7					Yes	Yes	Yes	Yes	Yes
ENSG00000163635	ATXN7	7	Yes				Yes	Yes		Yes	Yes
ENSG00000179456	ZBTB18	7		Yes			Yes	Yes		Yes	Yes
ENSG00000225808	DNAJC19P5	7	Yes	Yes			Yes	Yes			Yes
ENSG00000243650	RN7SL834P	7	Yes	Yes			Yes	Yes			Yes
ENSG00000258682	AL132989.1	7	Yes	Yes			Yes	Yes			Yes
ENSG00000272994	AC012360.3	7	Yes	Yes			Yes	Yes			Yes
ENSG00000273174	AC108673.2	7	Yes	Yes			Yes	Yes			Yes
ENSG00000280138	AC027290.2	7	Yes	Yes			Yes	Yes			Yes
ENSG00000281195	AC007878.1	7	Yes				Yes	Yes		Yes	Yes
ENSG00000018189	RUFY3	6					Yes	Yes		Yes	Yes
ENSG00000073584	SMARCE1	6					Yes	Yes		Yes	Yes
ENSG00000090238	YPEL3	6					Yes	Yes		Yes	Yes
ENSG00000097096	SYDE2	6					Yes	Yes		Yes	Yes
ENSG00000103490	PYCARD	6					Yes	Yes		Yes	Yes
ENSG00000106003	LFNG	6		Yes			Yes	Yes			Yes
ENSG00000110344	UBE4A	6					Yes	Yes		Yes	Yes
ENSG00000120696	KBTBD7	6					Yes	Yes		Yes	Yes
ENSG00000123700	KCNJ2	6		Yes			Yes	Yes			Yes
ENSG00000124659	TBCC	6					Yes	Yes		Yes	Yes
ENSG00000125347	IRF1	6					Yes	Yes		Yes	Yes
ENSG00000125740	FOSB	6					Yes	Yes		Yes	Yes
ENSG00000132825	PPP1R3D	6					Yes	Yes		Yes	Yes
ENSG00000135976	ANKRD36	6					Yes	Yes		Yes	Yes
ENSG00000140932	CMTM2	6					Yes	Yes		Yes	Yes
ENSG00000141854	MISP3	6					Yes	Yes		Yes	Yes
ENSG00000144802	NFKBIZ	6	Yes	Yes			Yes	Yes
ENSG00000151849	CENPJ	6					Yes	Yes		Yes	Yes
ENSG00000155926	SLA	6					Yes	Yes		Yes	Yes
ENSG00000160613	PCSK7	6					Yes	Yes		Yes	Yes
ENSG00000162601	MYSM1	6					Yes	Yes		Yes	Yes
ENSG00000163154	TNFAIP8L2	6					Yes	Yes		Yes	Yes
ENSG00000163191	S100A11	6					Yes	Yes		Yes	Yes
ENSG00000163219	ARHGAP25	6					Yes	Yes		Yes	Yes
ENSG00000163611	SPICE1	6					Yes	Yes		Yes	Yes
ENSG00000166260	COX11	6					Yes	Yes		Yes	Yes
ENSG00000173517	PEAK1	6					Yes	Yes		Yes	Yes
ENSG00000173825	TIGD3	6					Yes	Yes		Yes	Yes
ENSG00000175538	KCNE3	6					Yes	Yes		Yes	Yes
ENSG00000181631	P2RY13	6					Yes	Yes		Yes	Yes
ENSG00000182117	NOP10	6			Yes	Yes			Yes	Yes	Yes
ENSG00000184277	TM2D3	6					Yes	Yes		Yes	Yes
ENSG00000184786	TCTE3	6					Yes	Yes		Yes	Yes
ENSG00000187808	SOWAHD	6					Yes	Yes		Yes	Yes
ENSG00000188186	LAMTOR4	6					Yes	Yes		Yes	Yes
ENSG00000197992	CLEC9A	6					Yes	Yes		Yes	Yes
ENSG00000201217	RF00019	6					Yes	Yes		Yes	Yes
ENSG00000203668	CHML	6					Yes	Yes		Yes	Yes
ENSG00000204388	HSPA1B	6					Yes	Yes		Yes	Yes
ENSG00000214029	ZNF891	6					Yes	Yes		Yes	Yes
ENSG00000229124	VIM-AS1	6					Yes	Yes		Yes	Yes
ENSG00000235314	LINC00957	6					Yes	Yes		Yes	Yes
ENSG00000236525	AC007278.2	6	Yes				Yes	Yes			Yes
ENSG00000239883	PARGP1	6					Yes	Yes		Yes	Yes
ENSG00000240053	LY6G5B	6	Yes	Yes			Yes	Yes
ENSG00000243406	MRPS31P5	6					Yes	Yes		Yes	Yes
ENSG00000247287	AL359220.1	6					Yes	Yes		Yes	Yes
ENSG00000251562	MALAT1	6					Yes	Yes		Yes	Yes
ENSG00000252620	RNU6ATAC24P	6					Yes	Yes		Yes	Yes
ENSG00000260007	AC107871.1	6	Yes				Yes	Yes			Yes
ENSG00000270157	AC004918.3	6					Yes	Yes		Yes	Yes
ENSG00000274213	AC015912.3	6					Yes	Yes		Yes	Yes
ENSG00000279192	PWAR5	6					Yes	Yes	Yes		Yes
ENSG00000279811	AC093330.2	6	Yes	Yes			Yes	Yes
ENSG00000284930	AC005280.2	6					Yes	Yes		Yes	Yes
ENSG00000042832	TG	5	Yes	Yes			Yes	Yes
ENSG00000078687	TNRC6C	5	Yes	Yes	Yes	Yes			Yes
ENSG00000111961	SASH1	5	Yes	Yes			Yes	Yes
ENSG00000125735	TNFSF14	5					Yes	Yes			Yes
ENSG00000140379	BCL2A1	5	Yes	Yes			Yes	Yes
ENSG00000143452	HORMAD1	5	Yes	Yes			Yes	Yes
ENSG00000143878	RHOB	5					Yes	Yes			Yes
ENSG00000150627	WDR17	5					Yes	Yes			Yes
ENSG00000152492	CCDC50	5					Yes	Yes			Yes
ENSG00000152684	PELO	5					Yes	Yes			Yes
ENSG00000153234	NR4A2	5					Yes	Yes			Yes
ENSG00000162413	KLHL21	5					Yes	Yes			Yes
ENSG00000163545	NUAK2	5					Yes	Yes			Yes
ENSG00000170989	S1PR1	5	Yes	Yes	Yes	Yes			Yes
ENSG00000173110	HSPA6	5					Yes	Yes			Yes
ENSG00000179144	GIMAP7	5	Yes	Yes			Yes	Yes
ENSG00000180573	HIST1H2AC	5					Yes	Yes		Yes
ENSG00000181274	FRAT2	5					Yes	Yes			Yes
ENSG00000186130	ZBTB6	5	Yes	Yes			Yes	Yes
ENSG00000186594	MIR22HG	5	Yes	Yes			Yes	Yes
ENSG00000197837	HIST4H4	5					Yes	Yes			Yes
ENSG00000198563	DDX39B	5	Yes	Yes			Yes	Yes
ENSG00000204152	TIMM23B	5					Yes	Yes			Yes
ENSG00000206344	HCG27	5					Yes	Yes			Yes
ENSG00000218809	AL391903.1	5	Yes	Yes			Yes	Yes
ENSG00000224796	RPL32P1	5	Yes	Yes			Yes	Yes
ENSG00000229152	ANKRD10-IT1	5	Yes				Yes	Yes
ENSG00000229358	DPY19L1P1	5	Yes	Yes			Yes	Yes
ENSG00000236194	AC099811.1	5					Yes	Yes			Yes
ENSG00000239653	PSMD6-AS2	5	Yes	Yes			Yes	Yes
ENSG00000244687	UBE2V1	5					Yes	Yes			Yes
ENSG00000244720	AC055748.1	5					Yes	Yes			Yes
ENSG00000255163	HSPE1P18	5					Yes	Yes			Yes
ENSG00000260669	AL096870.2	5					Yes	Yes			Yes
ENSG00000260822	AC004656.1	5					Yes	Yes		Yes	Yes
ENSG00000265625	AC104564.5	5	Yes	Yes			Yes	Yes
ENSG00000266236	NARF-IT1	5	Yes	Yes			Yes	Yes
ENSG00000270060	AC090589.3	5					Yes	Yes			Yes
ENSG00000272054	AC007390.2	5					Yes	Yes			Yes
ENSG00000272072	AC004492.1	5					Yes	Yes			Yes
ENSG00000275131	AC241952.1	5					Yes	Yes			Yes
ENSG00000277791	PSMB3	5			Yes	Yes			Yes		Yes
ENSG00000279520	AC093525.8	5	Yes	Yes			Yes	Yes
ENSG00000030419	IKZF2	4					Yes	Yes
ENSG00000038382	TRIO	4					Yes			Yes	Yes
ENSG00000082014	SMARCD3	4	Yes	Yes	Yes	Yes
ENSG00000104904	OAZ1	4							Yes	Yes	Yes
ENSG00000113732	ATP6V0E1	4							Yes	Yes	Yes
ENSG00000130724	CHMP2A	4							Yes	Yes	Yes
ENSG00000135913	USP37	4							Yes	Yes	Yes
ENSG00000137767	SQOR	4			Yes	Yes			Yes	Yes
ENSG00000145088	EAF2	4	Yes	Yes				Yes
ENSG00000145632	PLK2	4					Yes	Yes
ENSG00000149925	ALDOA	4	Yes	Yes			Yes	Yes
ENSG00000151835	SACS	4			Yes				Yes		Yes
ENSG00000152518	ZFP36L2	4						Yes			Yes
ENSG00000164032	H2AFZ	4							Yes	Yes	Yes
ENSG00000165030	NFIL3	4	Yes	Yes	Yes	Yes
ENSG00000165572	KBTBD6	4	Yes	Yes				Yes
ENSG00000165879	FRAT1	4						Yes			Yes
ENSG00000166189	HPS6	4						Yes			Yes
ENSG00000168894	RNF181	4							Yes	Yes	Yes
ENSG00000169252	ADRB2	4	Yes				Yes	Yes
ENSG00000170852	KBTBD2	4					Yes			Yes	Yes
ENSG00000174501	ANKRD36C	4					Yes	Yes
ENSG00000176749	CDK5R1	4					Yes	Yes		Yes
ENSG00000185829	ARL17A	4		Yes			Yes	Yes
ENSG00000189114	BLOC1S3	4								Yes	Yes
ENSG00000198258	UBL5	4							Yes	Yes	Yes
ENSG00000198752	CDC42BPB	4					Yes	Yes		Yes
ENSG00000213782	DDX47	4						Yes			Yes
ENSG00000226091	LINC00937	4	Yes	Yes	Yes	Yes
ENSG00000235316	DUSP8P5	4					Yes	Yes
ENSG00000235532	LINC00402	4					Yes	Yes
ENSG00000241839	PLEKHO2	4						Yes			Yes
ENSG00000242294	STAG3L5P	4					Yes	Yes		Yes
ENSG00000246596	AC139795.1	4					Yes	Yes
ENSG00000002919	SNX11	3								Yes	Yes
ENSG00000005075	POLR2J	3								Yes	Yes
ENSG00000011243	AKAP8L	3	Yes	Yes					Yes
ENSG00000013441	CLK1	3					Yes	Yes
ENSG00000024862	CCDC28A	3								Yes	Yes
ENSG00000034713	GABARAPL2	3								Yes	Yes
ENSG00000038427	VCAN	3					Yes	Yes
ENSG00000042493	CAPG	3			Yes	Yes			Yes
ENSG00000049883	PTCD2	3								Yes	Yes
ENSG00000063978	RNF4	3								Yes	Yes
ENSG00000069667	RORA	3			Yes	Yes			Yes
ENSG00000069966	GNB5	3								Yes	Yes
ENSG00000071575	TRIB2	3			Yes	Yes			Yes
ENSG00000082293	COL19A1	3					Yes	Yes
ENSG00000086712	TXLNG	3								Yes	Yes
ENSG00000088179	PTPN4	3			Yes	Yes			Yes
ENSG00000089053	ANAPC5	3								Yes	Yes
ENSG00000100106	TRIOBP	3			Yes	Yes			Yes
ENSG00000100284	TOM1	3			Yes	Yes			Yes
ENSG00000100410	PHF5A	3								Yes	Yes
ENSG00000100650	SRSF5	3	Yes	Yes
ENSG00000101096	NFATC2	3			Yes	Yes			Yes
ENSG00000101363	MANBAL	3								Yes	Yes
ENSG00000102882	MAPK3	3			Yes	Yes			Yes
ENSG00000102908	NFAT5	3					Yes	Yes
ENSG00000103343	ZNF174	3								Yes	Yes
ENSG00000105355	PLIN3	3			Yes	Yes			Yes
ENSG00000105518	TMEM205	3			Yes	Yes			Yes
ENSG00000106133	NSUN5P2	3					Yes	Yes
ENSG00000110446	SLC15A3	3			Yes	Yes			Yes
ENSG00000111276	CDKN1B	3								Yes	Yes
ENSG00000111348	ARHGDIB	3								Yes	Yes
ENSG00000111371	SLC38A1	3			Yes	Yes			Yes
ENSG00000111452	ADGRD1	3	Yes	Yes		Yes
ENSG00000111540	RAB5B	3								Yes	Yes
ENSG00000111615	KRR1	3								Yes	Yes
ENSG00000113369	ARRDC3	3					Yes	Yes
ENSG00000114383	TUSC2	3								Yes	Yes
ENSG00000114423	CBLB	3			Yes	Yes			Yes
ENSG00000114784	EIF1B	3								Yes	Yes
ENSG00000116560	SFPQ	3								Yes	Yes
ENSG00000116863	ADPRHL2	3								Yes	Yes
ENSG00000116977	LGALS8	3								Yes	Yes
ENSG00000117020	AKT3	3			Yes	Yes			Yes
ENSG00000119048	UBE2B	3								Yes	Yes
ENSG00000119655	NPC2	3			Yes	Yes			Yes
ENSG00000119737	GPR75	3								Yes	Yes
ENSG00000121067	SPOP	3								Yes	Yes
ENSG00000121552	CSTA	3			Yes	Yes			Yes
ENSG00000122965	RBM19	3								Yes	Yes
ENSG00000124193	SRSF6	3								Yes	Yes
ENSG00000124203	ZNF831	3			Yes	Yes			Yes
ENSG00000127125	PPCS	3								Yes	Yes
ENSG00000129235	TXNDC17	3								Yes	Yes
ENSG00000129317	PUS7L	3							Yes		Yes
ENSG00000130338	TULP4	3			Yes	Yes			Yes
ENSG00000130755	GMFG	3								Yes	Yes
ENSG00000131100	ATP6V1E1	3								Yes	Yes
ENSG00000131981	LGALS3	3			Yes	Yes			Yes
ENSG00000132581	SDF2	3							Yes	Yes	Yes
ENSG00000133216	EPHB2	3		Yes	Yes	Yes
ENSG00000134243	SORT1	3		Yes	Yes	Yes
ENSG00000134852	CLOCK	3							Yes		Yes
ENSG00000135211	TMEM60	3								Yes	Yes
ENSG00000135404	CD63	3			Yes	Yes			Yes
ENSG00000135473	PAN2	3								Yes	Yes
ENSG00000135722	FBXL8	3					Yes	Yes
ENSG00000136026	CKAP4	3			Yes	Yes			Yes
ENSG00000136810	TXN	3			Yes	Yes			Yes
ENSG00000137955	RABGGTB	3								Yes	Yes
ENSG00000138433	CIR1	3								Yes	Yes
ENSG00000140259	MFAP1	3								Yes	Yes
ENSG00000143149	ALDH9A1	3								Yes	Yes
ENSG00000143207	COP1	3								Yes	Yes
ENSG00000143458	GABPB2	3			Yes	Yes			Yes
ENSG00000143546	S100A8	3			Yes	Yes			Yes
ENSG00000145428	RNF175	3					Yes	Yes
ENSG00000146457	WTAP	3								Yes	Yes
ENSG00000149527	PLCH2	3					Yes	Yes
ENSG00000150637	CD226	3			Yes	Yes			Yes
ENSG00000151229	SLC2A13	3					Yes				Yes
ENSG00000151612	ZNF827	3			Yes	Yes			Yes
ENSG00000154124	OTULIN	3								Yes	Yes
ENSG00000154165	GPR15	3					Yes	Yes
ENSG00000154310	TNIK	3			Yes	Yes			Yes
ENSG00000154781	CCDC174	3								Yes	Yes
ENSG00000155876	RRAGA	3								Yes	Yes
ENSG00000158869	FCER1G	3			Yes	Yes			Yes
ENSG00000159140	SON	3								Yes	Yes
ENSG00000159592	GPBP1L1	3								Yes	Yes
ENSG00000159720	ATP6V0D1	3			Yes	Yes			Yes
ENSG00000159882	ZNF230	3								Yes	Yes
ENSG00000160218	TRAPPC10	3								Yes	Yes
ENSG00000160714	UBE2Q1	3								Yes	Yes
ENSG00000161405	IKZF3	3			Yes	Yes			Yes
ENSG00000162971	TYW5	3								Yes	Yes
ENSG00000163220	S100A9	3			Yes	Yes			Yes
ENSG00000165457	FOLR2	3			Yes	Yes			Yes
ENSG00000165548	TMEM63C	3					Yes	Yes
ENSG00000166326	TRIM44	3								Yes	Yes
ENSG00000166750	SLFN5	3			Yes	Yes			Yes
ENSG00000166848	TERF2IP	3								Yes	Yes
ENSG00000167210	LOXHD1	3					Yes	Yes
ENSG00000167604	NFKBID	3	Yes	Yes		Yes
ENSG00000167778	SPRYD3	3								Yes	Yes
ENSG00000167978	SRRM2	3					Yes	Yes
ENSG00000167984	NLRC3	3			Yes	Yes			Yes
ENSG00000168528	SERINC2	3	Yes		Yes	Yes
ENSG00000168906	MAT2A	3								Yes	Yes
ENSG00000168970	JMJD7-PLA2G4B	3					Yes	Yes
ENSG00000169045	HNRNPH1	3								Yes	Yes
ENSG00000169084	DHRSX	3			Yes	Yes			Yes
ENSG00000169682	SPNS1	3	Yes	Yes
ENSG00000171456	ASXL1	3								Yes	Yes
ENSG00000172215	CXCR6	3					Yes	Yes
ENSG00000172575	RASGRP1	3			Yes	Yes			Yes
ENSG00000173113	TRMT112	3								Yes	Yes
ENSG00000174021	GNG5	3								Yes	Yes
ENSG00000175806	MSRA	3			Yes	Yes			Yes
ENSG00000177156	TALDO1	3			Yes	Yes			Yes
ENSG00000177932	ZNF354C	3								Yes	Yes
ENSG00000178988	MRFAP1L1	3								Yes	Yes
ENSG00000179010	MRFAP1	3								Yes	Yes
ENSG00000179562	GCC1	3								Yes	Yes
ENSG00000179933	C14orf119	3								Yes	Yes
ENSG00000180787	ZFP3	3								Yes	Yes
ENSG00000181722	ZBTB20	3					Yes	Yes
ENSG00000184293	CLECL1	3					Yes	Yes
ENSG00000184898	RBM43	3			Yes	Yes			Yes
ENSG00000185697	MYBL1	3			Yes	Yes			Yes
ENSG00000186017	ZNF566	3	Yes	Yes					Yes
ENSG00000188322	SBK1	3		Yes	Yes	Yes
ENSG00000196230	TUBB	3								Yes	Yes
ENSG00000197956	S100A6	3			Yes	Yes			Yes
ENSG00000198589	LRBA	3			Yes	Yes			Yes
ENSG00000198740	ZNF652	3								Yes	Yes
ENSG00000198742	SMURF1	3								Yes	Yes
ENSG00000198783	ZNF830	3								Yes	Yes
ENSG00000204186	ZDBF2	3					Yes	Yes
ENSG00000204261	PSMB8-AS1	3								Yes	Yes
ENSG00000204397	CARD16	3			Yes	Yes			Yes
ENSG00000205189	ZBTB10	3							Yes		Yes
ENSG00000205352	PRR13	3								Yes	Yes
ENSG00000205423	CNEP1R1	3								Yes	Yes
ENSG00000205476	CCDC85C	3						Yes
ENSG00000213246	SUPT4H1	3								Yes	Yes
ENSG00000213366	GSTM2	3					Yes	Yes
ENSG00000213719	CLIC1	3			Yes	Yes			Yes
ENSG00000213976	AC010615.1	3					Yes				Yes
ENSG00000214212	C19orf38	3			Yes	Yes			Yes
ENSG00000214293	APTR	3								Yes	Yes
ENSG00000214530	STARD10	3			Yes	Yes			Yes
ENSG00000221823	PPP3R1	3								Yes	Yes
ENSG00000224152	AC009506.1	3					Yes	Yes
ENSG00000225889	AC012368.1	3					Yes	Yes
ENSG00000233730	LINC01765	3					Yes	Yes
ENSG00000233937	AC008443.1	3								Yes	Yes
ENSG00000242258	LINC00996	3					Yes	Yes
ENSG00000243156	MICAL3	3					Yes	Yes
ENSG00000244682	FCGR2C	3	Yes		Yes	Yes
ENSG00000249915	PDCD6	3								Yes	Yes
ENSG00000250251	PKD1P6	3					Yes	Yes
ENSG00000256594	AC010186.2	3					Yes	Yes
ENSG00000257093	KIAA1147	3								Yes	Yes
ENSG00000260565	ERVK13-1	3					Yes	Yes
ENSG00000261326	LINC01355	3					Yes	Yes
ENSG00000266378	AC005224.3	3			Yes	Yes			Yes
ENSG00000267278	MAP3K14-AS1	3						Yes
ENSG00000268001	CARD8-AS1	3								Yes	Yes
ENSG00000278864	AC055811.4	3					Yes	Yes
ENSG00000278897	AC020951.1	3					Yes	Yes
ENSG00000279377	AC003973.3	3					Yes	Yes
ENSG00000280347	AC000123.3	3								Yes	Yes
ENSG00000001629	ANKIB1	2									Yes
ENSG00000007402	CACNA2D2	2			Yes	Yes
ENSG00000008394	MGST1	2			Yes	Yes
ENSG00000008438	PGLYRP1	2			Yes	Yes
ENSG00000011422	PLAUR	2			Yes	Yes
ENSG00000011600	TYROBP	2			Yes				Yes
ENSG00000012174	MBTPS2	2									Yes
ENSG00000015475	BID	2									Yes
ENSG00000027869	SH2D2A	2			Yes	Yes
ENSG00000030582	GRN	2			Yes				Yes
ENSG00000041353	RAB27B	2			Yes	Yes
ENSG00000048405	ZNF800	2									Yes
ENSG00000066379	ZNRD1	2									Yes
ENSG00000067836	ROGDI	2			Yes	Yes
ENSG00000072274	TFRC	2									Yes
ENSG00000083750	RRAGB	2									Yes
ENSG00000085265	FCN1	2			Yes	Yes
ENSG00000087258	GNAO1	2			Yes	Yes
ENSG00000088833	NSFL1C	2									Yes
ENSG00000090339	ICAM1	2			Yes	Yes
ENSG00000092841	MYL6	2							Yes	Yes
ENSG00000100422	CERK	2									Yes
ENSG00000100504	PYGL	2			Yes	Yes
ENSG00000100941	PNN	2	Yes	Yes
ENSG00000101425	BPI	2			Yes	Yes
ENSG00000101457	DNTTIP1	2									Yes
ENSG00000102010	BMX	2			Yes	Yes
ENSG00000102032	RENBP	2			Yes				Yes
ENSG00000103502	CDIPT	2									Yes
ENSG00000103507	BCKDK	2			Yes				Yes
ENSG00000103522	IL21R	2	Yes	Yes
ENSG00000104490	NCALD	2			Yes	Yes
ENSG00000104870	FCGRT	2			Yes				Yes
ENSG00000104918	RETN	2			Yes	Yes
ENSG00000105501	SIGLEC5	2			Yes	Yes
ENSG00000107036	RIC1	2								Yes
ENSG00000107077	KDM4C	2									Yes
ENSG00000107164	FUBP3	2									Yes
ENSG00000107485	GATA3	2			Yes	Yes
ENSG00000107679	PLEKHA1	2			Yes				Yes
ENSG00000108465	CDK5RAP3	2	Yes	Yes
ENSG00000108518	PFN1	2									Yes
ENSG00000109452	INPP4B	2			Yes				Yes
ENSG00000109743	BST1	2			Yes	Yes
ENSG00000110077	MS4A6A	2			Yes	Yes
ENSG00000110844	PRPF40B	2									Yes
ENSG00000112182	BACH2	2			Yes	Yes
ENSG00000112799	LY86	2			Yes	Yes
ENSG00000115325	DOK1	2									Yes
ENSG00000115828	QPCT	2			Yes	Yes
ENSG00000116350	SRSF4	2									Yes
ENSG00000117318	ID3	2					Yes	Yes
ENSG00000118058	KMT2A	2			Yes				Yes
ENSG00000118520	ARG1	2			Yes	Yes
ENSG00000118922	KLF12	2			Yes				Yes
ENSG00000121316	PLBD1	2			Yes	Yes
ENSG00000121350	PYROXD1	2									Yes
ENSG00000122862	SRGN	2			Yes	Yes
ENSG00000122986	HVCN1	2									Yes
ENSG00000123552	USP45	2									Yes
ENSG00000125384	PTGER2	2									Yes
ENSG00000125498	KIR2DL1	2					Yes	Yes
ENSG00000125676	THOC2	2									Yes
ENSG00000126432	PRDX5	2			Yes				Yes
ENSG00000126759	CFP	2			Yes				Yes
ENSG00000126861	OMG	2	Yes	Yes
ENSG00000126883	NUP214	2									Yes
ENSG00000127980	PEX1	2									Yes
ENSG00000128595	CALU	2									Yes
ENSG00000129245	FXR2	2									Yes
ENSG00000130066	SAT1	2	Yes	Yes
ENSG00000131375	CAPN7	2									Yes
ENSG00000131503	ANKHD1	2
ENSG00000132424	PNISR	2	Yes	Yes
ENSG00000132522	GPS2	2	Yes	Yes
ENSG00000132801	ZSWIM3	2									Yes
ENSG00000132965	ALOX5AP	2					Yes			Yes
ENSG00000134830	C5AR2	2									Yes
ENSG00000134882	UBAC2	2									Yes
ENSG00000134884	ARGLU1	2	Yes	Yes
ENSG00000135218	CD36	2			Yes	Yes
ENSG00000136238	RAC1	2									Yes
ENSG00000136280	CCM2	2									Yes
ENSG00000136527	TRA2B	2									Yes
ENSG00000136709	WDR33	2									Yes
ENSG00000137275	RIPK1	2									Yes
ENSG00000137501	SYTL2	2			Yes	Yes
ENSG00000138018	SELENOI	2									Yes
ENSG00000138772	ANXA3	2			Yes	Yes
ENSG00000139200	PIANP	2									Yes
ENSG00000139572	GPR84	2			Yes	Yes
ENSG00000139826	ABHD13	2									Yes
ENSG00000139908	TSSK4	2	Yes	Yes
ENSG00000142046	TMEM91	2					Yes
ENSG00000142185	TRPM2	2	Yes	Yes
ENSG00000143412	ANXA9	2									Yes
ENSG00000143842	SOX13	2			Yes	Yes
ENSG00000145075	CCDC39	2	Yes	Yes
ENSG00000145491	ROPN1L	2			Yes	Yes
ENSG00000145734	BDP1	2			Yes				Yes
ENSG00000147234	FRMPD3	2			Yes	Yes
ENSG00000147364	FBXO25	2									Yes
ENSG00000147649	MTDH	2									Yes
ENSG00000152969	JAKMIP1	2			Yes	Yes
ENSG00000157954	WIPI2	2									Yes
ENSG00000158321	AUTS2	2			Yes	Yes
ENSG00000158480	SPATA2	2									Yes
ENSG00000158517	NCF1	2			Yes			Yes
ENSG00000159352	PSMD4	2							Yes	Yes
ENSG00000160229	ZNF66	2						Yes
ENSG00000160633	SAFB	2									Yes
ENSG00000160791	CCR5	2	Yes	Yes
ENSG00000161298	ZNF382	2									Yes
ENSG00000161944	ASGR2	2			Yes	Yes
ENSG00000162444	RBP7	2			Yes	Yes
ENSG00000162517	PEF1	2									Yes
ENSG00000162664	ZNF326	2									Yes
ENSG00000163131	CTSS	2			Yes	Yes
ENSG00000163221	S100A12	2			Yes	Yes
ENSG00000163453	IGFBP7	2	Yes	Yes
ENSG00000163563	MNDA	2			Yes	Yes
ENSG00000163931	TKT	2			Yes	Yes
ENSG00000163958	ZDHHC19	2			Yes	Yes
ENSG00000164011	ZNF691	2									Yes
ENSG00000164047	CAMP	2			Yes	Yes
ENSG00000165819	METTL3	2	Yes	Yes
ENSG00000165886	UBTD1	2			Yes				Yes
ENSG00000166411	IDH3A	2									Yes
ENSG00000166579	NDEL1	2									Yes
ENSG00000166595	FAM96B	2									Yes
ENSG00000167552	TUBA1A	2			Yes	Yes
ENSG00000167987	VPS37C	2									Yes
ENSG00000168092	PAFAH1B2	2									Yes
ENSG00000168806	LCMT2	2	Yes	Yes
ENSG00000169031	COL4A3	2						Yes
ENSG00000169914	OTUD3	2									Yes
ENSG00000170915	PAQR8	2	Yes	Yes
ENSG00000171467	ZNF318	2								Yes
ENSG00000172175	MALT1	2									Yes
ENSG00000172315	TP53RK	2	Yes	Yes
ENSG00000172530	BANP	2									Yes
ENSG00000172869	DMXL1	2									Yes
ENSG00000173258	ZNF483	2									Yes
ENSG00000173482	PTPRM	2			Yes	Yes
ENSG00000175213	ZNF408	2									Yes
ENSG00000175938	ORAI3	2									Yes
ENSG00000176095	IP6K1	2									Yes
ENSG00000176390	CRLF3	2								Yes	Yes
ENSG00000177628	GBA	2			Yes	Yes
ENSG00000177666	PNPLA2	2			Yes				Yes
ENSG00000177674	AGTRAP	2			Yes				Yes
ENSG00000177888	ZBTB41	2			Yes				Yes
ENSG00000178719	GRINA	2			Yes				Yes
ENSG00000180530	NRIP1	2									Yes
ENSG00000180539	C9orf139	2			Yes	Yes
ENSG00000180884	ZNF792	2									Yes
ENSG00000180901	KCTD2	2									Yes
ENSG00000181215	C4orf50	2			Yes	Yes
ENSG00000182253	SYNM	2			Yes	Yes
ENSG00000182700	IGIP	2	Yes	Yes
ENSG00000183087	GAS6	2			Yes				Yes
ENSG00000183161	FANCF	2	Yes	Yes
ENSG00000183891	TTC32	2	Yes	Yes
ENSG00000185000	DGAT1	2			Yes				Yes
ENSG00000185513	L3MBTL1	2								Yes
ENSG00000186205	MARC1	2			Yes	Yes
ENSG00000186407	CD300E	2	Yes	Yes
ENSG00000186431	FCAR	2			Yes	Yes
ENSG00000186591	UBE2H	2									Yes
ENSG00000187266	EPOR	2									Yes
ENSG00000188315	C3orf62	2									Yes
ENSG00000188529	SRSF10	2									Yes
ENSG00000188997	KCTD21	2									Yes
ENSG00000196189	SEMA4A	2			Yes	Yes
ENSG00000196329	GIMAP5	2
ENSG00000196605	ZNF846	2									Yes
ENSG00000197147	LRRC8B	2	Yes	Yes
ENSG00000197249	SERPINA1	2			Yes	Yes
ENSG00000197405	C5AR1	2			Yes	Yes
ENSG00000197471	SPN	2	Yes	Yes
ENSG00000197969	VPS13A	2			Yes				Yes
ENSG00000198482	ZNF808	2									Yes
ENSG00000198695	MT-ND6	2			Yes	Yes
ENSG00000198780	FAM169A	2			Yes				Yes
ENSG00000198786	MT-ND5	2			Yes	Yes
ENSG00000203879	GDI1	2									Yes
ENSG00000204472	AIF1	2			Yes	Yes
ENSG00000205056	LINC02397	2					Yes	Yes
ENSG00000209082	MT-TL1	2			Yes	Yes
ENSG00000211891	IGHE	2					Yes	Yes
ENSG00000212907	MT-ND4L	2			Yes	Yes
ENSG00000213462	ERV3-1	2					Yes	Yes
ENSG00000213693	SEC14L1P1	2									Yes
ENSG00000216490	IFI30	2	Yes	Yes
ENSG00000219200	RNASEK	2	Yes	Yes
ENSG00000225217	HSPA7	2			Yes	Yes
ENSG00000226328	NUP50-AS1	2					Yes	Yes
ENSG00000227155	AL161725.1	2	Yes	Yes
ENSG00000229807	XIST	2	Yes	Yes
ENSG00000231628	AL133406.2	2	Yes	Yes
ENSG00000232354	VIPR1-AS1	2	Yes	Yes
ENSG00000233411	AL359962.1	2			Yes	Yes
ENSG00000234338	AC073349.2	2	Yes	Yes
ENSG00000237522	NONOP2	2									Yes
ENSG00000241343	RPL36A	2									Yes
ENSG00000243544	RN7SL172P	2						Yes
ENSG00000244462	RBM12	2									Yes
ENSG00000249667	LINC01259	2									Yes
ENSG00000254789	AC073172.1	2			Yes	Yes
ENSG00000257511	AC084824.1	2									Yes
ENSG00000259366	AC108449.2	2									Yes
ENSG00000261505	AL031714.1	2	Yes	Yes
ENSG00000263826	AC112907.3	2	Yes	Yes
ENSG00000268734	AC245128.3	2			Yes	Yes
ENSG00000269737	AL691432.1	2	Yes	Yes
ENSG00000269858	EGLN2	2	Yes	Yes
ENSG00000269954	AC022239.1	2	Yes	Yes
ENSG00000271614	ATP2B1-AS1	2						Yes
ENSG00000271993	AC126118.1	2						Yes
ENSG00000275056	AC020663.3	2	Yes	Yes
ENSG00000275180	AC048341.2	2								Yes
ENSG00000279530	AC092881.1	2	Yes	Yes
ENSG00000281106	TMEM272	2	Yes	Yes
ENSG00000283646	LINC02009	2			Yes	Yes
ENSG00000284669	AC092053.3	2	Yes	Yes
ENSG00000284977	AL160272.1	2					Yes	Yes
ENSG00000004059	ARF5	1							Yes
ENSG00000005379	TSPOAP1	1						Yes
ENSG00000005700	IBTK	1							Yes
ENSG00000006327	TNFRSF12A	1									Yes
ENSG00000009413	REV3L	1							Yes
ENSG00000009954	BAZ1B	1							Yes
ENSG00000010256	UQCRC1	1							Yes
ENSG00000010327	STAB1	1						Yes
ENSG00000012223	LTF	1			Yes
ENSG00000012779	ALOX5	1			Yes
ENSG00000012983	MAP4K5	1							Yes
ENSG00000013275	PSMC4	1							Yes
ENSG00000013563	DNASE1L1	1							Yes
ENSG00000015171	ZMYND11	1							Yes
ENSG00000023516	AKAP11	1							Yes
ENSG00000023902	PLEKHO1	1							Yes
ENSG00000030066	NUP160	1							Yes
ENSG00000033867	SLC4A7	1							Yes
ENSG00000036549	AC118549.1	1							Yes
ENSG00000040199	PHLPP2	1							Yes
ENSG00000040633	PHF23	1
ENSG00000041988	THAP3	1
ENSG00000047249	ATP6V1H	1							Yes
ENSG00000051523	CYBA	1							Yes
ENSG00000051620	HEBP2	1				Yes
ENSG00000056277	ZNF280C	1							Yes
ENSG00000056586	RC3H2	1							Yes
ENSG00000064309	CDON	1							Yes
ENSG00000064490	RFXANK	1							Yes
ENSG00000064607	SUGP2	1								Yes
ENSG00000064651	SLC12A2	1							Yes
ENSG00000065883	CDK13	1							Yes
ENSG00000066654	THUMPD1	1							Yes
ENSG00000066933	MYO9A	1							Yes
ENSG00000067829	IDH3G	1							Yes
ENSG00000069020	MAST4	1							Yes
ENSG00000069275	NUCKS1	1							Yes
ENSG00000069702	TGFBR3	1			Yes
ENSG00000070010	UFD1	1							Yes
ENSG00000072506	HSD17B10	1							Yes
ENSG00000074800	ENO1	1							Yes
ENSG00000075415	SLC25A3	1							Yes
ENSG00000075624	ACTB	1							Yes
ENSG00000076321	KLHL20	1							Yes
ENSG00000076770	MBNL3	1							Yes
ENSG00000076944	STXBP2	1							Yes
ENSG00000077097	TOP2B	1							Yes
ENSG00000077549	CAPZB	1							Yes
ENSG00000078246	TULP3	1							Yes
ENSG00000078674	PCM1	1							Yes
ENSG00000079739	PGM1	1							Yes
ENSG00000080345	RIF1	1							Yes
ENSG00000080839	RBL1	1							Yes
ENSG00000081014	AP4E1	1							Yes
ENSG00000081386	ZNF510	1							Yes
ENSG00000081985	IL12RB2	1			Yes
ENSG00000082898	XPO1	1							Yes
ENSG00000083844	ZNF264	1							Yes
ENSG00000084093	REST	1							Yes
ENSG00000084207	GSTP1	1							Yes
ENSG00000085511	MAP3K4	1							Yes
ENSG00000085514	PILRA	1			Yes
ENSG00000085721	RRN3	1							Yes
ENSG00000085871	MGST2	1				Yes
ENSG00000086504	MRPL28	1							Yes
ENSG00000087299	L2HGDH	1							Yes
ENSG00000088298	EDEM2	1							Yes
ENSG00000089050	RBBP9	1							Yes
ENSG00000090615	GOLGA3	1							Yes
ENSG00000090905	TNRC6A	1							Yes
ENSG00000092439	TRPM7	1							Yes
ENSG00000093010	COMT	1							Yes
ENSG00000096006	CRISP3	1			Yes
ENSG00000099341	PSMD8	1							Yes
ENSG00000099817	POLR2E	1							Yes
ENSG00000100142	POLR2F	1
ENSG00000100319	ZMAT5	1							Yes
ENSG00000100365	NCF4	1			Yes
ENSG00000100490	CDKL1	1
ENSG00000100578	KIAA0586	1							Yes
ENSG00000100592	DAAM1	1							Yes
ENSG00000100612	DHRS7	1				Yes
ENSG00000100852	ARHGAP5	1							Yes
ENSG00000100865	CINP	1							Yes
ENSG00000100906	NFKBIA	1				Yes
ENSG00000101182	PSMA7	1							Yes
ENSG00000101365	IDH3B	1							Yes
ENSG00000101439	CST3	1			Yes
ENSG00000101473	ACOT8	1							Yes
ENSG00000101935	AMMECR1	1							Yes
ENSG00000102144	PGK1	1							Yes
ENSG00000102781	KATNAL1	1							Yes
ENSG00000102837	OLFM4	1			Yes
ENSG00000102879	CORO1A	1							Yes
ENSG00000103187	COTL1	1							Yes
ENSG00000103363	ELOB	1							Yes
ENSG00000103811	CTSH	1			Yes
ENSG00000104218	CSPP1	1							Yes
ENSG00000104805	NUCB1	1							Yes
ENSG00000104824	HNRNPL	1
ENSG00000104915	STX10	1							Yes
ENSG00000105058	FAM32A	1							Yes
ENSG00000105583	WDR83OS	1							Yes
ENSG00000105669	COPE	1							Yes
ENSG00000105671	DDX49	1							Yes
ENSG00000105700	KXD1	1							Yes
ENSG00000105866	SP4	1							Yes
ENSG00000106086	PLEKHA8	1							Yes
ENSG00000106245	BUD31	1							Yes
ENSG00000106400	ZNHIT1	1							Yes
ENSG00000106723	SPIN1	1							Yes
ENSG00000106771	TMEM245	1							Yes
ENSG00000107874	CUEDC2	1							Yes
ENSG00000108506	INTS2	1							Yes
ENSG00000108528	SLC25A11	1							Yes
ENSG00000108639	SYNGR2	1							Yes
ENSG00000109113	RAB34	1							Yes
ENSG00000109854	HTATIP2	1									Yes
ENSG00000109920	FNBP4	1
ENSG00000110442	COMMD9	1							Yes
ENSG00000110801	PSMD9	1							Yes
ENSG00000110876	SELPLG	1
ENSG00000110955	ATP5F1B	1							Yes
ENSG00000111229	ARPC3	1				Yes
ENSG00000111450	STX2	1						Yes
ENSG00000111640	GAPDH	1							Yes
ENSG00000111679	PTPN6	1							Yes
ENSG00000112144	ICK	1							Yes
ENSG00000112159	MDN1	1			Yes
ENSG00000112294	ALDH5A1	1				Yes
ENSG00000112303	VNN2	1			Yes
ENSG00000112695	COX7A2	1							Yes
ENSG00000113269	RNF130	1			Yes
ENSG00000113360	DROSHA	1							Yes
ENSG00000113441	LNPEP	1							Yes
ENSG00000113569	NUP155	1							Yes
ENSG00000114062	UBE3A	1							Yes
ENSG00000114374	USP9Y	1							Yes
ENSG00000114738	MAPKAPK3	1							Yes
ENSG00000115234	SNX17	1							Yes
ENSG00000115365	LANCL1	1							Yes
ENSG00000115520	COQ10B	1								Yes
ENSG00000115827	DCAF17	1							Yes
ENSG00000116005	PCYOX1	1							Yes
ENSG00000116127	ALMS1	1							Yes
ENSG00000116138	DNAJC16	1							Yes
ENSG00000116667	C1orf21	1			Yes
ENSG00000116984	MTR	1							Yes
ENSG00000117118	SDHB	1							Yes
ENSG00000117308	GALE	1							Yes
ENSG00000117560	FASLG	1			Yes
ENSG00000117862	TXNDC12	1							Yes
ENSG00000118412	CASP8AP2	1							Yes
ENSG00000118620	ZNF430	1							Yes
ENSG00000118965	WDR35	1							Yes
ENSG00000119661	DNAL1	1							Yes
ENSG00000119820	YIPF4	1
ENSG00000119906	SLF2	1							Yes
ENSG00000120253	NUP43	1	Yes
ENSG00000120306	CYSTM1	1			Yes
ENSG00000121892	PDS5A	1							Yes
ENSG00000122188	LAX1	1			Yes
ENSG00000122566	HNRNPA2B1	1
ENSG00000123144	TRIR	1
ENSG00000123200	ZC3H13	1							Yes
ENSG00000123353	ORMDL2	1							Yes
ENSG00000124155	PIGT	1							Yes
ENSG00000124160	NCOA5	1
ENSG00000124469	CEACAM8	1			Yes
ENSG00000124588	NQO2	1			Yes
ENSG00000124731	TREM1	1	Yes
ENSG00000125352	RNF113A	1								Yes
ENSG00000125484	GTF3C4	1							Yes
ENSG00000125734	GPR108	1							Yes
ENSG00000125780	TGM3	1			Yes
ENSG00000125818	PSMF1	1							Yes
ENSG00000125835	SNRPB	1							Yes
ENSG00000125885	MCM8	1							Yes
ENSG00000125970	RALY	1							Yes
ENSG00000126267	COX6B1	1							Yes
ENSG00000126561	STAT5A	1
ENSG00000126768	TIMM17B	1							Yes
ENSG00000126777	KTN1	1
ENSG00000126804	ZBTB1	1							Yes
ENSG00000127334	DYRK2	1							Yes
ENSG00000127914	AKAP9	1							Yes
ENSG00000127995	CASD1	1							Yes
ENSG00000128000	ZNF780B	1							Yes
ENSG00000128340	RAC2	1									Yes
ENSG00000128463	EMC4	1							Yes
ENSG00000128524	ATP6V1F	1							Yes
ENSG00000129315	CCNT1	1							Yes
ENSG00000130560	UBAC1	1							Yes
ENSG00000130703	OSBPL2	1
ENSG00000130717	UCK1	1							Yes
ENSG00000131018	SYNE1	1			Yes
ENSG00000131023	LATS1	1							Yes
ENSG00000131437	KIF3A	1							Yes
ENSG00000131475	VPS25	1							Yes
ENSG00000131669	NINJ1	1			Yes
ENSG00000131845	ZNF304	1							Yes
ENSG00000132953	XPO4	1							Yes
ENSG00000133874	RNF122	1								Yes
ENSG00000134539	KLRD1	1			Yes
ENSG00000134744	ZCCHC11	1							Yes
ENSG00000135124	P2RX4	1							Yes
ENSG00000135441	BLOC1S1	1							Yes
ENSG00000135821	GLUL	1	Yes
ENSG00000135966	TGFBRAP1	1
ENSG00000136169	SETDB2	1
ENSG00000136490	LIMD2	1							Yes
ENSG00000136827	TOR1A	1							Yes
ENSG00000136930	PSMB7	1							Yes
ENSG00000137040	RANBP6	1							Yes
ENSG00000137100	DCTN3	1							Yes
ENSG00000137145	DENND4C	1							Yes
ENSG00000137404	NRM	1							Yes
ENSG00000137409	MTCH1	1							Yes
ENSG00000137462	TLR2	1				Yes
ENSG00000137601	NEK1	1							Yes
ENSG00000137656	BUD13	1
ENSG00000137760	ALKBH8	1							Yes
ENSG00000137947	GTF2B	1								Yes
ENSG00000137992	DBT	1							Yes
ENSG00000138078	PREPL	1							Yes
ENSG00000138629	UBL7	1							Yes
ENSG00000138758	2023-09-11	1							Yes
ENSG00000138767	CNOT6L	1							Yes
ENSG00000138964	PARVG	1							Yes
ENSG00000139116	KIF21A	1			Yes
ENSG00000139926	FRMD6	1							Yes
ENSG00000139977	NAA30	1							Yes
ENSG00000140262	TCF12	1							Yes
ENSG00000140264	SERF2	1							Yes
ENSG00000140319	SRP14	1								Yes
ENSG00000140367	UBE2Q2	1							Yes
ENSG00000140650	PMM2	1									Yes
ENSG00000140749	IGSF6	1									Yes
ENSG00000140948	ZCCHC14	1							Yes
ENSG00000141956	PRDM15	1
ENSG00000141971	MVB12A	1							Yes
ENSG00000142507	PSMB6	1							Yes
ENSG00000142556	ZNF614	1							Yes
ENSG00000142875	PRKACB	1							Yes
ENSG00000143543	JTB	1							Yes
ENSG00000143612	C1orf43	1							Yes
ENSG00000143862	ARL8A	1							Yes
ENSG00000144824	PHLDB2	1			Yes
ENSG00000145431	PDGFC	1				Yes
ENSG00000145675	PIK3R1	1							Yes
ENSG00000145907	G3BP1	1							Yes
ENSG00000146425	DYNLT1	1								Yes
ENSG00000146433	TMEM181	1							Yes
ENSG00000147854	UHRF2	1
ENSG00000147874	HAUS6	1							Yes
ENSG00000148180	GSN	1			Yes
ENSG00000148308	GTF3C5	1							Yes
ENSG00000148346	LCN2	1			Yes
ENSG00000148719	DNAJB12	1							Yes
ENSG00000148925	BTBD10	1								Yes
ENSG00000149212	SESN3	1							Yes
ENSG00000149308	NPAT	1							Yes
ENSG00000149311	ATM	1							Yes
ENSG00000149357	LAMTOR1	1							Yes
ENSG00000149923	PPP4C	1							Yes
ENSG00000151150	ANK3	1			Yes
ENSG00000151746	BICD1	1							Yes
ENSG00000152332	UHMK1	1							Yes
ENSG00000152409	JMY	1							Yes
ENSG00000152484	USP12	1
ENSG00000152642	GPD1L	1							Yes
ENSG00000155545	MIER3	1							Yes
ENSG00000155850	SLC26A2	1							Yes
ENSG00000156504	FAM122B	1							Yes
ENSG00000156531	PHF6	1							Yes
ENSG00000156650	KAT6B	1							Yes
ENSG00000157020	SEC13	1							Yes
ENSG00000157500	APPL1	1							Yes
ENSG00000157916	RER1	1							Yes
ENSG00000158552	ZFAND2B	1							Yes
ENSG00000158691	ZSCAN12	1							Yes
ENSG00000158711	ELK4	1							Yes
ENSG00000158864	NDUFS2	1							Yes
ENSG00000159210	SNF8	1							Yes
ENSG00000159377	PSMB4	1							Yes
ENSG00000159459	UBR1	1							Yes
ENSG00000159496	RGL4	1			Yes
ENSG00000159658	EFCAB14	1							Yes
ENSG00000160075	SSU72	1							Yes
ENSG00000160404	TOR2A	1							Yes
ENSG00000160783	PMF1	1							Yes
ENSG00000160948	VPS28	1							Yes
ENSG00000161010	MRNIP	1
ENSG00000161203	AP2M1	1							Yes
ENSG00000161526	SAP30BP	1							Yes
ENSG00000162139	NEU3	1
ENSG00000162236	STX5	1							Yes
ENSG00000162613	FUBP1	1
ENSG00000162688	AGL	1							Yes
ENSG00000162804	SNED1	1
ENSG00000163104	SMARCAD1	1							Yes
ENSG00000163156	SCNM1	1							Yes
ENSG00000163291	PAQR3	1							Yes
ENSG00000163479	SSR2	1							Yes
ENSG00000163508	EOMES	1			Yes
ENSG00000163719	MTMR14	1							Yes
ENSG00000163902	RPN1	1							Yes
ENSG00000163946	FAM208A	1							Yes
ENSG00000163956	LRPAP1	1							Yes
ENSG00000164088	PPM1M	1							Yes
ENSG00000164114	MAP9	1							Yes
ENSG00000164134	NAA15	1							Yes
ENSG00000164151	ICE1	1							Yes
ENSG00000164164	OTUD4	1							Yes
ENSG00000164323	CFAP97	1							Yes
ENSG00000164821	DEFA4	1			Yes
ENSG00000165178	NCF1C	1			Yes
ENSG00000165392	WRN	1							Yes
ENSG00000166167	BTRC	1							Yes
ENSG00000166439	RNF169	1	Yes
ENSG00000166860	ZBTB39	1							Yes
ENSG00000166946	CCNDBP1	1								Yes
ENSG00000167005	NUDT21	1							Yes
ENSG00000167232	ZNF91	1							Yes
ENSG00000167377	ZNF23	1								Yes
ENSG00000167434	CA4	1			Yes
ENSG00000167565	SERTAD3	1							Yes
ENSG00000167633	KIR3DL1	1						Yes
ENSG00000167635	ZNF146	1							Yes
ENSG00000167705	RILP	1							Yes
ENSG00000167770	OTUB1	1							Yes
ENSG00000168591	TMUB2	1							Yes
ENSG00000168795	ZBTB5	1							Yes
ENSG00000169223	LMAN2	1							Yes
ENSG00000169372	CRADD	1							Yes
ENSG00000169564	PCBP1	1							Yes
ENSG00000169692	AGPAT2	1							Yes
ENSG00000170113	NIPA1	1							Yes
ENSG00000170242	USP47	1							Yes
ENSG00000170909	OSCAR	1			Yes
ENSG00000171148	TADA3	1							Yes
ENSG00000171314	PGAM1	1							Yes
ENSG00000171700	RGS19	1							Yes
ENSG00000172262	ZNF131	1							Yes
ENSG00000172354	GNB2	1							Yes
ENSG00000172531	PPP1CA	1							Yes
ENSG00000172757	CFL1	1							Yes
ENSG00000173391	OLR1	1			Yes
ENSG00000173846	PLK3	1	Yes
ENSG00000173928	SWSAP1	1							Yes
ENSG00000174197	MGA	1							Yes
ENSG00000174276	ZNHIT2	1
ENSG00000174428	GTF2IRD2B	1
ENSG00000174485	DENND4A	1							Yes
ENSG00000174744	BRMS1	1							Yes
ENSG00000174953	DHX36	1							Yes
ENSG00000175054	ATR	1							Yes
ENSG00000175087	PDIK1L	1							Yes
ENSG00000175203	DCTN2	1							Yes
ENSG00000175414	ARL10	1							Yes
ENSG00000175505	CLCF1	1				Yes
ENSG00000175573	C11orf68	1
ENSG00000175595	ERCC4	1							Yes
ENSG00000175634	RPS6KB2	1							Yes
ENSG00000175793	SFN	1
ENSG00000176055	MBLAC2	1							Yes
ENSG00000176101	SSNA1	1							Yes
ENSG00000176225	RTTN	1							Yes
ENSG00000176407	KCMF1	1								Yes
ENSG00000176624	MEX3C	1							Yes
ENSG00000177311	ZBTB38	1							Yes
ENSG00000177485	ZBTB33	1							Yes
ENSG00000177707	NECTIN3	1							Yes
ENSG00000178104	PDE4DIP	1							Yes
ENSG00000178149	DALRD3	1							Yes
ENSG00000178202	KDELC2	1							Yes
ENSG00000179195	ZNF664	1							Yes
ENSG00000179632	MAF1	1							Yes
ENSG00000179918	SEPHS2	1								Yes
ENSG00000179950	PUF60	1							Yes
ENSG00000181104	F2R	1			Yes
ENSG00000181220	ZNF746	1
ENSG00000181817	LSM10	1							Yes
ENSG00000181827	RFX7	1							Yes
ENSG00000182149	IST1	1								Yes
ENSG00000182150	ERCC6L2	1
ENSG00000182310	SPACA6	1				Yes
ENSG00000182446	NPLOC4	1							Yes
ENSG00000182670	TTC3	1							Yes
ENSG00000182796	TMEM198B	1
ENSG00000183011	NAA38	1							Yes
ENSG00000183258	DDX41	1							Yes
ENSG00000183309	ZNF623	1							Yes
ENSG00000183401	CCDC159	1							Yes
ENSG00000183495	EP400	1							Yes
ENSG00000184009	ACTG1	1							Yes
ENSG00000184575	XPOT	1							Yes
ENSG00000185129	PURA	1							Yes
ENSG00000185404	SP140L	1
ENSG00000185475	TMEM179B	1							Yes
ENSG00000185624	P4HB	1							Yes
ENSG00000185670	ZBTB3	1
ENSG00000185825	BCAP31	1							Yes
ENSG00000185920	PTCH1	1			Yes
ENSG00000186001	LRCH3	1							Yes
ENSG00000186446	ZNF501	1	Yes
ENSG00000187187	ZNF546	1							Yes
ENSG00000187764	SEMA4D	1									Yes
ENSG00000188229	TUBB4B	1							Yes
ENSG00000188818	ZDHHC11	1							Yes
ENSG00000188917	TRMT2B	1							Yes
ENSG00000189077	TMEM120A	1									Yes
ENSG00000196118	CCDC189	1							Yes
ENSG00000196169	KIF19	1	Yes
ENSG00000196172	ZNF681	1							Yes
ENSG00000196323	ZBTB44	1							Yes
ENSG00000196417	ZNF765	1							Yes
ENSG00000196502	SULT1A1	1			Yes
ENSG00000196705	ZNF431	1							Yes
ENSG00000196867	ZFP28	1							Yes
ENSG00000196998	WDR45	1							Yes
ENSG00000197044	ZNF441	1							Yes
ENSG00000197056	ZMYM1	1							Yes
ENSG00000197124	ZNF682	1							Yes
ENSG00000197283	SYNGAP1	1			Yes
ENSG00000197312	DDI2	1							Yes
ENSG00000197603	C5orf42	1							Yes
ENSG00000197746	PSAP	1			Yes
ENSG00000198315	ZKSCAN8	1							Yes
ENSG00000198356	ASNA1	1							Yes
ENSG00000198521	ZNF43	1							Yes
ENSG00000198707	CEP290	1							Yes
ENSG00000198736	MSRB1	1			Yes
ENSG00000198743	SLC5A3	1							Yes
ENSG00000198799	LRIG2	1							Yes
ENSG00000198887	SMC5	1
ENSG00000204104	TRAF3IP1	1							Yes
ENSG00000204116	CHIC1	1							Yes
ENSG00000204138	PHACTR4	1							Yes
ENSG00000204344	STK19	1							Yes
ENSG00000204356	NELFE	1							Yes
ENSG00000204386	NEU1	1							Yes
ENSG00000204435	CSNK2B	1							Yes
ENSG00000204519	ZNF551	1							Yes
ENSG00000204923	FBXO48	1							Yes
ENSG00000204936	CD177	1			Yes
ENSG00000205060	SLC35B4	1							Yes
ENSG00000205220	PSMB10	1							Yes
ENSG00000205250	E2F4	1							Yes
ENSG00000205339	IPO7	1							Yes
ENSG00000205765	C5orf51	1							Yes
ENSG00000208028	MIR616	1	Yes
ENSG00000211694	TRGV10	1			Yes
ENSG00000213160	KLHL23	1							Yes
ENSG00000213373	LINC00671	1			Yes
ENSG00000213523	SRA1	1							Yes
ENSG00000213654	GPSM3	1							Yes
ENSG00000214114	MYCBP	1								Yes
ENSG00000214367	HAUS3	1							Yes
ENSG00000220804	LINC01881	1								Yes
ENSG00000222009	BTBD19	1						Yes
ENSG00000224078	SNHG14	1							Yes
ENSG00000229314	ORM1	1			Yes
ENSG00000229391	HLA-DRB6	1			Yes
ENSG00000234290	AC116366.1	1	Yes
ENSG00000239839	DEFA3	1			Yes
ENSG00000242372	EIF6	1							Yes
ENSG00000242574	HLA-DMB	1		Yes
ENSG00000247556	OIP5-AS1	1							Yes
ENSG00000248712	CCDC153	1			Yes
ENSG00000253719	ATXN7L3B	1							Yes
ENSG00000254275	LINC00824	1					Yes
ENSG00000254428	AP003392.1	1	Yes
ENSG00000254901	BORCS8	1							Yes
ENSG00000255422	AP002954.1	1			Yes
ENSG00000256087	ZNF432	1							Yes
ENSG00000257017	HP	1			Yes
ENSG00000258227	CLEC5A	1				Yes
ENSG00000260916	CCPG1	1								Yes
ENSG00000261098	AP000766.1	1							Yes
ENSG00000261609	GAN	1							Yes
ENSG00000267074	AC015911.3	1
ENSG00000271254	AC240274.1	1						Yes
ENSG00000272455	AL391244.3	1						Yes
ENSG00000274173	AL035661.1	1			Yes
ENSG00000279861	AC073548.1	1	Yes
ENSG00000280385	AP000648.3	1		Yes
ENSG00000281357	ARRDC3-AS1	1

## Sheet: miRNA
ID	N	JIVE			RGCCA
		Pooled	Male	Female	Female
		miRNAmRNADNAm	miRNAmRNADNAm	miRNAmRNADNAm	miRNAmRNADNAm
hsa-miR-124-3p	2	Yes	Yes
hsa-let-7b-5p	1				Yes
hsa-let-7d-5p	1				Yes
hsa-miR-140-5p	1				Yes
hsa-miR-142-3p	1				Yes
hsa-miR-143-3p	1				Yes
hsa-miR-145-3p	1				Yes
hsa-miR-148a-3p	1				Yes
hsa-miR-15b-5p	1				Yes
hsa-miR-21-5p	1				Yes
hsa-miR-26b-5p	1				Yes
hsa-miR-301a-3p	1				Yes
hsa-miR-30e-5p	1				Yes
hsa-miR-32-3p	1				Yes
hsa-miR-320a-3p	1				Yes
hsa-miR-340-5p	1				Yes
hsa-miR-374a-3p	1				Yes
hsa-miR-374b-3p	1				Yes
hsa-miR-424-5p	1				Yes
hsa-miR-450a-5p	1				Yes
hsa-miR-450b-5p	1				Yes
hsa-miR-486-3p	1				Yes
hsa-miR-532-3p	1				Yes
hsa-miR-542-3p	1				Yes
hsa-miR-550a-3p	1				Yes
hsa-miR-5585-3p	1			Yes
hsa-miR-590-3p	1				Yes
hsa-miR-6511a-3p	1				Yes
hsa-miR-92a-3p	1				Yes
hsa-miR-92b-3p	1				Yes

## Sheet: DNAm
ID	N	JIVE		RGCCA			Annotation
		Female		Male	Female
		miRNAmRNADNAm	mRNADNAm	miRNAmRNADNAm	miRNAmRNADNAm	mRNADNAm	Chr	Start	End	Gene symbol
cg00017931	1					Yes	chr6	157511147	157511149	ZDHHC14
cg00067751	1					Yes	chr9	101487458	101487460	TMEM246
cg00092309	4	Yes	Yes		Yes	Yes	chr4	185013642	185013644
cg00167039	1			Yes			chr7	30029473	30029475	PLEKHA8
cg00169964	1	Yes					chr10	84214415	84214417	PCDH21
cg00199007	1			Yes			chr20	62952557	62952559	SLC17A9
cg00253228	1			Yes			chr8	143951441	143951443	PLEC1
cg00320217	1			Yes			chr2	197442995	197442997
cg00336149	2	Yes	Yes				chr3	53666167	53666169	CACNA1D
cg00369241	1					Yes	chr11	299587	299589	IFITM5
cg00374672	1					Yes	chr7	100865793	100865795	SLC12A9
cg00448395	1					Yes	chr7	124930304	124930306	POT1
cg00482119	1			Yes			chr15	63491192	63491194
cg00532474	1			Yes			chr18	46072627	46072629	PSTPIP2
cg00551910	2				Yes	Yes	chr14	69571255	69571257	C14orf162
cg00554993	1					Yes	chr14	23119406	23119408	CEBPE
cg00560093	1					Yes	chr1	154714858	154714860	KCNN3
cg00648932	1					Yes	chr2	176999336	176999338	AC079305.11
cg00676294	2				Yes	Yes	chr8	68261154	68261156
cg00682263	1					Yes	chr15	65896464	65896466	MEGF11
cg00734395	1					Yes	chr10	4080458	4080460	LOC101927964
cg00747928	1					Yes	chr11	78470068	78470070	NARS2
cg00789535	1					Yes	chr5	32538906	32538908	SUB1
cg00813378	1					Yes	chr1	1539828	1539830	C1orf70
cg00814401	1			Yes			chr18	59862477	59862479
cg00898584	1					Yes	chr3	71544449	71544451	FOXP1
cg00901401	1	Yes					chr2	24049173	24049175	FKBP1B
cg00999947	1			Yes			chr7	75611755	75611757	HIP1
cg01009216	1					Yes	chr7	36261761	36261763	EEPD1
cg01023672	1					Yes	chr12	47083439	47083441	FAM113B
cg01076459	1			Yes			chr17	3004935	3004937	RAP1GAP2
cg01150497	2	Yes				Yes	chr1	2189538	2189540	FAAP20
cg01154210	1					Yes	chr21	26120992	26120994	APP
cg01176433	1					Yes	chr15	69462374	69462376	RP11-279F6.1
cg01218619	1			Yes			chr4	25088675	25088677
cg01232717	1			Yes			chr8	73958820	73958822	TCEB1
cg01254719	2				Yes	Yes	chr20	59403178	59403180
cg01255417	2	Yes				Yes	chr6	10422402	10422404
cg01290568	1					Yes	chr2	112836281	112836283	IL1B
cg01299932	1			Yes			chr6	16512261	16512263	ATXN1
cg01313002	1					Yes	chr7	38878644	38878646	VPS41
cg01329519	1					Yes	chr5	53303201	53303203
cg01339381	1			Yes			chr11	70327859	70327861	PPFIA1
cg01343146	1					Yes	chr14	61490164	61490166	PRKCH
cg01401327	1					Yes	chr7	101813894	101813896
cg01423591	1					Yes	chr4	183408904	183408906
cg01508380	1			Yes			chr14	22836375	22836377	MMP14
cg01521397	1			Yes			chr20	62015815	62015817	TAF4
cg01555000	1					Yes	chr16	1890528	1890530
cg01561957	2				Yes	Yes	chr1	115112822	115112824
cg01572694	1			Yes			chr17	48580192	48580194	MIR10A
cg01586609	1					Yes	chr11	113976214	113976216	HTR3A
cg01597480	1					Yes	chr7	120989349	120989351	C7orf58
cg01620164	1					Yes	chr2	163733761	163733763	FIGN
cg01668831	1					Yes	chr11	12137975	12137977	MICAL2
cg01676795	1			Yes			chr7	75957029	75957031	POR
cg01749779	1					Yes	chr3	192957628	192957630
cg01771416	1			Yes			chr3	101848515	101848517	NFKBIZ
cg01788836	1					Yes	chr11	1750722	1750724	IFITM10
cg01797450	1	Yes					chr6	167734079	167734081
cg01823925	1			Yes			chr5	157540892	157540894	ADAM19
cg01829672	1			Yes			chr5	157855608	157855610	CLINT1
cg01865923	4	Yes	Yes		Yes	Yes	chr20	1336955	1336957	FKBP1A-SDCBP2
cg01868616	1			Yes			chr11	75330555	75330557	ARRB1
cg01894875	4	Yes	Yes		Yes	Yes	chr1	2190081	2190083	C1orf86
cg01933228	1			Yes			chr1	99851080	99851082	AGL
cg01986936	1			Yes			chr5	169648763	169648765	DOCK2
cg02010655	2				Yes	Yes	chr6	14612211	14612213
cg02013762	1					Yes	chr20	46194117	46194119	CDH22
cg02058108	1					Yes	chr12	26195183	26195185	SSPN
cg02061804	1			Yes			chr17	182661	182663	DOC2B
cg02075432	1					Yes	chr6	18330628	18330630
cg02142483	4	Yes	Yes		Yes	Yes	chr16	84526948	84526950
cg02160684	1					Yes	chr8	125435790	125435792	TRIB1
cg02194396	3		Yes		Yes	Yes	chr19	427161	427163	SHC2
cg02233041	1					Yes	chr4	121164404	121164406	TNIP3
cg02243630	1			Yes			chr4	153465387	153465389	KIAA0922
cg02287817	1					Yes	chr2	73294776	73294778	EGR4
cg02297879	2				Yes	Yes	chr10	132331256	132331258	LRRC27
cg02311193	1			Yes			chr17	48582639	48582641	RP11-357H14.16
cg02407222	1			Yes			chr14	75259775	75259777	RP11-293M10.2
cg02428792	1			Yes			chr4	25088974	25088976
cg02465761	1					Yes	chr8	6877987	6877989	DEFB1
cg02560069	2				Yes	Yes	chr15	39133413	39133415
cg02703734	1					Yes	chr2	48601498	48601500	STON1-GTF2A1L
cg02711470	3	Yes			Yes	Yes	chr8	52566709	52566711	FAM150A
cg02713669	1	Yes					chr2	109130234	109130236	LOC100287216
cg02740091	1					Yes	chr2	8177187	8177189	LINC00299
cg02747442	1					Yes	chr20	22403792	22403794	LOC284788
cg02761839	1			Yes			chr2	160377931	160377933	RBMS1
cg02771117	3	Yes			Yes	Yes	chr8	11421842	11421844	FAM167A
cg02776283	1			Yes			chr2	219209808	219209810	ABCB6
cg02863397	1					Yes	chr11	13664330	13664332
cg02927682	1			Yes			chr1	54378750	54378752	SSBP3
cg02964632	1			Yes			chr2	170073637	170073639	UBR3
cg02989257	2				Yes	Yes	chr1	31703672	31703674	COL16A1
cg03014241	1			Yes			chr16	11254753	11254755	SOCS1
cg03054432	1			Yes			chr1	65255441	65255443	DNAJC6
cg03108005	1					Yes	chr5	148806180	148806182
cg03120555	1					Yes	chr7	590835	590837	PRKAR1B
cg03193328	2				Yes	Yes	chr7	66281864	66281866	TPST1
cg03234813	1					Yes	chr21	44391479	44391481	TRPM2
cg03249707	2				Yes	Yes	chr1	16054221	16054223	CLCNKB
cg03277268	1					Yes	chr7	151926274	151926276
cg03290827	1			Yes			chr17	77184677	77184679	SEC14L1
cg03330979	1			Yes			chr2	148782263	148782265	EPC2
cg03387494	1			Yes			chr20	34675683	34675685	PIGU
cg03388025	1					Yes	chr16	89827920	89827922	SPIRE2
cg03392759	1			Yes			chr18	801521	801523	YES1
cg03447892	1			Yes			chr10	16968781	16968783	CUBN
cg03464224	1			Yes			chr4	153518827	153518829	KIAA0922
cg03494634	1					Yes	chr19	9128281	9128283	OR7G3
cg03529189	1					Yes	chr12	63898357	63898359	SRGAP1
cg03560731	1					Yes	chr12	4170144	4170146
cg03562071	1					Yes	chr8	23854538	23854540	STC1
cg03589967	1			Yes			chr2	64223426	64223428
cg03607973	1					Yes	chr16	81437982	81437984
cg03609435	1					Yes	chr17	36609355	36609357
cg03613353	1			Yes			chr19	7630754	7630756	XAB2
cg03621504	1			Yes			chr12	116133434	116133436	MED13L
cg03667422	1	Yes					chr20	31309177	31309179	DEFB116
cg03682581	1					Yes	chr2	85605265	85605267	C2orf68
cg03685315	1					Yes	chr19	7919285	7919287	SNAPC2
cg03688134	1					Yes	chr12	94172285	94172287	PLXNC1
cg03701930	1			Yes			chr10	1939241	1939243
cg03717057	1			Yes			chr7	26365113	26365115	SNX10
cg03793277	1					Yes	chr19	44913652	44913654	APOC1
cg03826564	2				Yes	Yes	chr15	101089104	101089106
cg03830429	1			Yes			chr14	55583217	55583219	KTN1
cg03830443	1					Yes	chr8	105321719	105321721	ZFPM2
cg03834864	1			Yes			chr12	70906884	70906886	PTPRR
cg03853809	2				Yes	Yes	chr1	220690039	220690041	C1orf115
cg03891015	1			Yes			chr3	60081688	60081690	FHIT
cg03917666	1			Yes			chr10	3935415	3935417	RP11-464C19.3
cg03996151	2				Yes	Yes	chr9	121368122	121368124	STOM
cg04024514	1			Yes			chr22	38266335	38266337	TMEM184B
cg04054921	2				Yes	Yes	chr11	1897045	1897047
cg04068159	1			Yes			chr3	196247105	196247107	PCYT1A
cg04095154	1			Yes			chr1	21050970	21050972	EIF4G3
cg04111435	1					Yes	chr11	63680982	63680984	RTN3
cg04128378	1					Yes	chr21	26130389	26130391	APP
cg04152446	1			Yes			chr9	131981641	131981643	MED27
cg04164245	1					Yes	chr20	20837447	20837449
cg04164838	1					Yes	chr19	14480335	14480337	GIPC1
cg04173586	4	Yes	Yes		Yes	Yes	chr19	2167496	2167498	DOT1L
cg04284140	1			Yes			chr7	44124375	44124377	POLD2
cg04286823	2	Yes	Yes				chr2	109130546	109130548	LOC100287216
cg04360967	1			Yes			chr6	14636272	14636274
cg04387445	3	Yes			Yes	Yes	chr9	101487476	101487478	TMEM246
cg04472859	1					Yes	chr6	119467915	119467917	LOC285762
cg04518186	1			Yes			chr11	77588916	77588918	AQP11
cg04560304	1					Yes	chr3	119506800	119506802	TIMMDC1
cg04614651	2				Yes	Yes	chr20	61719881	61719883	CDH4
cg04627461	1			Yes			chr4	76278533	76278535	FAM47E
cg04664516	1			Yes			chr10	87879049	87879051	PTEN
cg04722511	3	Yes			Yes	Yes	chr1	20365728	20365730	RP4-749H3.1
cg04728446	1					Yes	chr6	10850913	10850915	SYCP2L
cg04739880	2				Yes	Yes	chr6	35050087	35050089	ANKS1A
cg04768368	1				Yes		chr10	122019846	122019848	TACC2
cg04771100	1			Yes			chr8	38974815	38974817	HTRA4
cg04837959	1					Yes	chr1	29415673	29415675
cg04971779	1					Yes	chr6	44222991	44222993	SLC29A1
cg05083852	1			Yes			chr16	81447004	81447006	CMIP
cg05086879	1					Yes	chr22	39465484	39465486	MGAT3
cg05137895	1				Yes		chr8	49251760	49251762
cg05160404	1					Yes	chr8	16604525	16604527	RP11-13N12.2
cg05169828	1					Yes	chr16	89845650	89845652	SPIRE2
cg05202729	1				Yes		chr10	132023620	132023622
cg05210364	1					Yes	chr6	34697361	34697363	C6orf106
cg05218021	1					Yes	chr1	38114428	38114430	RP5-884C9.2
cg05282260	1					Yes	chr6	156662128	156662130
cg05326737	1					Yes	chr19	3304799	3304801
cg05337761	2	Yes				Yes	chr1	2189909	2189911	C1orf86
cg05376228	1					Yes	chr19	1123235	1123237	SBNO2
cg05412028	1			Yes			chr13	95300682	95300684	ABCC4
cg05486924	1			Yes			chr3	195258835	195258837	C3orf21
cg05498680	1					Yes	chr7	7103364	7103366	Y_RNA
cg05516277	1			Yes			chr10	58477967	58477969
cg05544095	1			Yes			chr3	115113701	115113703	ZBTB20
cg05575921	1		Yes				chr5	373262	373264	AHRR
cg05604158	1			Yes			chr2	176932163	176932165
cg05620326	1					Yes	chr8	98998027	98998029	RP11-410L14.2
cg05624475	2				Yes	Yes	chr4	118888559	118888561	SYNPO2
cg05663968	4	Yes	Yes		Yes	Yes	chr16	242215	242217	ITFG3
cg05739816	2		Yes			Yes	chr6	135668256	135668258	C6orf217
cg05746807	1			Yes			chr3	196736824	196736826
cg05874443	1					Yes	chr11	93193908	93193910	SLC36A4
cg05981785	1			Yes			chr2	73983832	73983834	AC073046.25
cg06061081	1			Yes			chr11	77588914	77588916	AQP11
cg06068545	1	Yes					chr1	214362644	214362646	PTPN14
cg06096243	1			Yes			chr14	77407556	77407558	NOXRED1
cg06102690	2				Yes	Yes	chr4	24980184	24980186	CCDC149
cg06122864	4	Yes	Yes		Yes	Yes	chr6	29661409	29661411	MOG
cg06193939	1					Yes	chr14	55074451	55074453
cg06213060	1					Yes	chr3	16536218	16536220	RP11-194G10.1
cg06260865	1					Yes	chr18	24672538	24672540
cg06354780	2	Yes				Yes	chr1	76830437	76830439
cg06372145	2	Yes				Yes	chr20	31392042	31392044	DEFB119
cg06372475	1			Yes			chr10	71774528	71774530	C10orf54
cg06418238	1					Yes	chr17	80781641	80781643	RPTOR
cg06472166	3	Yes	Yes			Yes	chr7	47744004	47744006
cg06473925	4	Yes	Yes		Yes	Yes	chr9	101479212	101479214	TMEM246
cg06479433	1			Yes			chr2	189698867	189698869	ANKAR
cg06523402	1		Yes				chr9	115596659	115596661
cg06526020	1			Yes			chr6	34341102	34341104	NUDT3
cg06526676	1					Yes	chr11	45920405	45920407	GYLTL1B
cg06570358	1					Yes	chr4	148007680	148007682	ARHGAP10
cg06583921	3	Yes	Yes			Yes	chr3	193777561	193777563
cg06586734	2		Yes			Yes	chr4	61143607	61143609	RP11-16N2.1
cg06616546	1			Yes			chr9	4208059	4208061	GLIS3
cg06618497	1			Yes			chr14	101732266	101732268	C14orf72
cg06628878	1					Yes	chr12	52601640	52601642	KRT72
cg06635952	1					Yes	chr2	69798736	69798738	ANXA4
cg06650246	1			Yes			chr1	206723924	206723926	MAPKAPK2
cg06684395	2	Yes				Yes	chr15	35059075	35059077
cg06759629	1			Yes			chr4	25088575	25088577
cg06775523	1					Yes	chr1	3598356	3598358	MEGF6
cg06852314	1			Yes			chr1	179027394	179027396	FAM20B
cg06872070	1			Yes			chr2	207847615	207847617	PLEKHM3
cg06873652	4	Yes	Yes		Yes	Yes	chr11	83250232	83250234	ANKRD42
cg06917451	3	Yes	Yes			Yes	chr1	177169447	177169449	FAM5B
cg06955432	1				Yes		chr3	108880282	108880284
cg06992846	1					Yes	chr8	125436594	125436596	TRIB1
cg06998765	1			Yes			chr14	74922914	74922916	RPS6KL1
cg07016145	3	Yes	Yes			Yes	chr5	154654605	154654607
cg07019857	2				Yes	Yes	chr5	107487147	107487149	EFNA5
cg07029024	1					Yes	chr11	65481870	65481872
cg07065756	1					Yes	chr7	2079704	2079706	MAD1L1
cg07080019	2	Yes	Yes				chr10	132223299	132223301	STK32C
cg07126798	2	Yes				Yes	chr15	38566920	38566922	RASGRP1
cg07151979	1			Yes			chr8	123034522	123034524	DERL1
cg07165026	1					Yes	chr19	45323062	45323064	CKM
cg07181702	1			Yes			chr17	59841320	59841322	MIR21
cg07275437	4	Yes	Yes		Yes	Yes	chr10	27659027	27659029
cg07286341	1			Yes			chr5	177496803	177496805	PDLIM7
cg07313319	1			Yes			chr22	38318420	38318422	CSNK1E
cg07322521	1					Yes	chr18	45974478	45974480
cg07347147	1					Yes	chr2	68837227	68837229	AC097495.2
cg07356342	1					Yes	chr1	161214029	161214031	NDUFS2
cg07380906	1			Yes			chr5	102865397	102865399	PAM
cg07398577	1					Yes	chr8	89839064	89839066
cg07400503	1					Yes	chr10	132296717	132296719	STK32C
cg07425555	1					Yes	chr19	13938204	13938206	PODNL1
cg07506356	1					Yes	chr14	43042416	43042418
cg07548255	3	Yes	Yes			Yes	chr2	109130297	109130299	LOC100287216
cg07607891	1			Yes			chr5	108729120	108729122	LINC01023
cg07625849	1			Yes			chr17	48580615	48580617	MIR10A
cg07806979	3	Yes	Yes			Yes	chr10	127947326	127947328	PTPRE
cg07824907	1			Yes			chr4	183399406	183399408
cg07924503	1					Yes	chr16	89507222	89507224	SPG7
cg07926542	2				Yes	Yes	chr12	121921329	121921331	WDR66
cg07933720	1					Yes	chr4	76547033	76547035	SHROOM3
cg07981168	1			Yes			chr10	30554645	30554647	RP11-253D19.1
cg08038033	1			Yes			chr3	71304904	71304906	FOXP1
cg08078742	1					Yes	chr12	127926152	127926154	LINC00507
cg08086084	1					Yes	chr19	55437181	55437183	SHISA7
cg08096750	3	Yes			Yes	Yes	chr8	100336512	100336514	RNF19A
cg08103496	1					Yes	chr12	1797750	1797752	CACNA2D4
cg08166072	2				Yes	Yes	chr2	45986780	45986782	PRKCE
cg08169020	1			Yes			chr14	68790170	68790172	ZFP36L1
cg08189186	1					Yes	chr19	38302905	38302907	C19orf33
cg08211895	2	Yes				Yes	chr2	48601218	48601220	STON1-GTF2A1L
cg08282375	1					Yes	chr20	50267366	50267368	LINC01272
cg08284593	2	Yes	Yes				chr13	113402754	113402756
cg08288126	1					Yes	chr3	12351292	12351294	PPARG
cg08310748	1					Yes	chr14	77508470	77508472	SPTLC2
cg08322244	1	Yes					chr17	8163350	8163352	VAMP2
cg08347373	1			Yes			chr2	159797174	159797176	CD302
cg08387381	2				Yes	Yes	chr10	75410172	75410174
cg08410918	1					Yes	chr14	71198879	71198881	RP1-292L20.1
cg08463105	1					Yes	chr2	97957715	97957717	TMEM131
cg08466464	1					Yes	chr7	75928637	75928639	POR
cg08476700	1				Yes		chr1	151920473	151920475
cg08481674	4	Yes	Yes		Yes	Yes	chr5	7250878	7250880
cg08494221	1			Yes			chr8	31034962	31034964	PURG
cg08506874	1	Yes					chr19	459730	459732	SHC2
cg08617945	1					Yes	chr4	46975985	46975987	GABRA4
cg08631650	2		Yes		Yes		chr5	150290249	150290251	CAMK2A
cg08683249	1			Yes			chr6	43644889	43644891	RSPH9
cg08738570	1					Yes	chr1	1539884	1539886	C1orf70
cg08799963	4	Yes	Yes		Yes	Yes	chr1	96845555	96845557
cg08825848	1					Yes	chr22	19943278	19943280	TXNRD2
cg08829299	3	Yes	Yes			Yes	chr11	288304	288306	ATHL1
cg08903858	1					Yes	chr15	81302841	81302843	IL16
cg09021225	1					Yes	chr1	2014885	2014887	RP11-547D24.1
cg09143195	1				Yes		chr12	40692098	40692100	CNTN1
cg09159993	1			Yes			chr6	71287648	71287650	OGFRL1
cg09216442	2				Yes	Yes	chr4	6201832	6201834	JAKMIP1
cg09229620	1					Yes	chr3	173398457	173398459	NLGN1
cg09348441	1					Yes	chr12	28108705	28108707
cg09349619	1					Yes	chr15	92343916	92343918
cg09375033	1			Yes			chr3	138114791	138114793	DZIP1L
cg09391799	1					Yes	chr14	22421478	22421480	TRDV2
cg09396840	1					Yes	chr12	95996405	95996407	HAL
cg09436262	1			Yes			chr2	48146112	48146114	AC079807.4
cg09437286	1					Yes	chr16	27400814	27400816	IL21R
cg09462203	1					Yes	chr22	37791893	37791895
cg09464268	1			Yes			chr17	182474	182476	DOC2B
cg09490424	1			Yes			chr2	26032539	26032541	RAB10
cg09493140	1					Yes	chr14	70982418	70982420	PCNX
cg09506037	2	Yes	Yes				chr2	133422988	133422990	NCKAP5
cg09599862	1					Yes	chr2	138504726	138504728	SPOPL
cg09636313	1					Yes	chr16	89003616	89003618
cg09660092	1					Yes	chr6	128806572	128806574	RP11-73O6.4
cg09664186	1			Yes			chr2	47870387	47870389	FBXO11
cg09771102	2	Yes				Yes	chr11	32210620	32210622
cg09799668	1			Yes			chr10	75253805	75253807
cg10046675	4	Yes	Yes		Yes	Yes	chr1	22350302	22350304
cg10077651	1					Yes	chr3	143977653	143977655	C3orf58
cg10077978	1			Yes			chr11	35040698	35040700
cg10096378	1					Yes	chr22	39995612	39995614	FAM83F
cg10180440	1			Yes			chr10	100565728	100565730
cg10181281	4	Yes	Yes		Yes	Yes	chr2	214411248	214411250	VWC2L
cg10187559	1				Yes		chr19	54415102	54415104	TTYH1
cg10244988	1					Yes	chr13	91134602	91134604	LINC00379
cg10251229	1					Yes	chr7	590943	590945	PRKAR1B
cg10258929	1					Yes	chr1	95510103	95510105	LOC100996635
cg10261205	1	Yes					chr11	289926	289928	ATHL1
cg10305928	2				Yes	Yes	chr10	60666460	60666462	ANK3
cg10411146	2	Yes	Yes				chr11	289965	289967	ATHL1
cg10417124	1					Yes	chr2	102127919	102127921	IL1R1
cg10457997	1			Yes			chr17	66800388	66800390	PRKCA
cg10476468	1					Yes	chr12	131132391	131132393	ADGRD1
cg10533826	1					Yes	chr8	108120036	108120038
cg10538602	1			Yes			chr1	21721314	21721316	USP48
cg10552964	1			Yes			chr6	36024024	36024026	SLC26A8
cg10572688	1			Yes			chr11	75836458	75836460	UVRAG
cg10575616	1					Yes	chr12	107401276	107401278	BTBD11
cg10580599	1					Yes	chr14	39232937	39232939	MIA2
cg10588962	1			Yes			chr17	48590224	48590226	LOC404266
cg10800369	3	Yes	Yes			Yes	chr12	16608995	16608997	LMO3
cg10830603	3	Yes	Yes			Yes	chr6	9834414	9834416	OFCC1
cg10833299	3	Yes	Yes			Yes	chr2	241808680	241808682	NEU4
cg10958452	1					Yes	chr1	43648674	43648676	KDM4A
cg10963657	1					Yes	chr1	95532428	95532430	RP11-286B14.1
cg11030887	1					Yes	chr19	51391264	51391266	C19orf84
cg11061419	1			Yes			chr20	53905229	53905231
cg11093292	2				Yes	Yes	chr3	57170644	57170646	IL17RD
cg11143674	1					Yes	chr15	98525870	98525872
cg11160908	4	Yes	Yes		Yes	Yes	chr3	122993423	122993425	SEMA5B
cg11216153	1			Yes			chr4	108000147	108000149	HADH
cg11240908	1					Yes	chr20	59042174	59042176	SLMO2
cg11245200	1			Yes			chr17	182065	182067	DOC2B
cg11315464	1					Yes	chr2	38572370	38572372	HNRNPLL
cg11316386	1					Yes	chr1	247112505	247112507	C1orf229
cg11395901	1					Yes	chr1	58897485	58897487	LINC01135
cg11492723	1					Yes	chr3	16536189	16536191	RP11-194G10.1
cg11519311	4	Yes	Yes		Yes	Yes	chr5	16181423	16181425	RP11-19O2.2
cg11535403	2	Yes	Yes				chr20	43102736	43102738	PTPRT
cg11557478	1					Yes	chr9	123033208	123033210	GPR21
cg11579421	1			Yes			chr10	132398352	132398354	PWWP2B
cg11581398	1					Yes	chr19	4277373	4277375	SHD
cg11628972	1	Yes					chr5	1645524	1645526
cg11714937	4	Yes	Yes		Yes	Yes	chr19	44002220	44002222	LOC101928063
cg11721349	2	Yes				Yes	chr6	53985530	53985532	RP11-411K7.1
cg11768167	2	Yes				Yes	chr6	29723111	29723113	HLA-F
cg11787160	2				Yes	Yes	chr12	113077526	113077528	DTX1
cg11802027	2				Yes	Yes	chr19	13938628	13938630	PODNL1
cg11813672	1			Yes			chr5	116478712	116478714	SEMA6A
cg11847078	4	Yes	Yes		Yes	Yes	chr7	1183067	1183069
cg11893552	1			Yes			chr6	167644587	167644589
cg11919646	1			Yes			chr12	120225427	120225429	PXN
cg11953311	2				Yes	Yes	chr6	31903062	31903064	ZBTB12
cg12054653	1					Yes	chr18	9575665	9575667	PPP4R1
cg12058385	1					Yes	chr2	143691116	143691118	ARHGAP15
cg12076818	1					Yes	chr2	65425461	65425463	SPRED2
cg12098991	1					Yes	chr4	8105493	8105495	ABLIM2
cg12110801	1			Yes			chr19	5992272	5992274
cg12162100	2				Yes	Yes	chr8	86517418	86517420	CPNE3
cg12182643	1					Yes	chr8	100336692	100336694	RNF19A
cg12184221	1					Yes	chr3	119463992	119463994	TMEM39A
cg12238465	2				Yes	Yes	chr16	50838399	50838401
cg12278070	1					Yes	chr4	82462492	82462494
cg12284098	1					Yes	chr8	2045777	2045779	MYOM2
cg12306086	1			Yes			chr4	105196589	105196591	TET2
cg12374275	1					Yes	chr14	30558432	30558434	G2E3
cg12512771	1					Yes	chr7	17690402	17690404
cg12539787	1			Yes			chr3	185721093	185721095	IGF2BP2-AS1
cg12547959	1					Yes	chr5	14326043	14326045	TRIO
cg12549700	1					Yes	chr2	18500499	18500501
cg12549908	1					Yes	chr10	4188374	4188376
cg12628061	1					Yes	chr1	55988056	55988058
cg12644285	1			Yes			chr15	93027722	93027724	CHD2
cg12662887	2		Yes		Yes		chr10	103584162	103584164	NEURL
cg12691080	1			Yes			chr10	69049894	69049896
cg12759361	1					Yes	chr12	92191205	92191207
cg12778716	1					Yes	chr18	6995012	6995014	LAMA1
cg12799314	1			Yes			chr10	1362997	1362999	ADARB2
cg12818023	1					Yes	chr12	123585658	123585660	LOC101927415
cg12856447	1					Yes	chr5	134458380	134458382	RP11-215P8.4
cg12936709	1			Yes			chr17	3094110	3094112	OR1D2
cg12950181	1					Yes	chr5	94111942	94111944	FAM172A
cg12956311	2				Yes	Yes	chr8	12953121	12953123	KIAA1456
cg13059651	1			Yes			chr2	177165400	177165402	AC079305.11
cg13122721	1			Yes			chr10	67837722	67837724	DNAJC12
cg13200482	1	Yes					chr21	45644547	45644549	PCBP3
cg13216568	1					Yes	chr21	44370029	44370031	TRPM2
cg13246698	1					Yes	chr2	48601604	48601606	STON1-GTF2A1L
cg13358061	1			Yes			chr17	37283352	37283354	ACACA
cg13386331	1					Yes	chr1	25462003	25462005	TMEM57
cg13399544	1					Yes	chr8	143567507	143567509	C8orf73
cg13422003	1					Yes	chr14	100447768	100447770	WDR25
cg13425335	4	Yes	Yes		Yes	Yes	chr12	132343761	132343763
cg13447684	4	Yes	Yes		Yes	Yes	chr7	1856266	1856268	MAD1L1
cg13468767	4	Yes	Yes		Yes	Yes	chr17	9768706	9768708
cg13485718	1					Yes	chr14	92849142	92849144
cg13554246	4	Yes	Yes		Yes	Yes	chr20	1337101	1337103	FKBP1A-SDCBP2
cg13556639	1					Yes	chr2	96507997	96507999	NEURL3
cg13665102	1					Yes	chr11	70006053	70006055	RP11-626H12.1
cg13667516	1			Yes			chr6	134230498	134230500	SGK1
cg13679679	1					Yes	chr3	28240753	28240755	CMC1
cg13712544	3	Yes	Yes			Yes	chr7	4124023	4124025	SDK1
cg13713922	1					Yes	chr2	120868001	120868003	GLI2
cg13716020	1					Yes	chr4	108774988	108774990
cg13777292	1					Yes	chr19	496418	496420	MADCAM1
cg13780841	1					Yes	chr7	90402157	90402159	CLDN12
cg13806230	1					Yes	chr15	48535116	48535118	FBN1
cg13839829	4	Yes	Yes		Yes	Yes	chr7	57371024	57371026
cg13844341	1			Yes			chr7	2076732	2076734	MAD1L1
cg13877316	1					Yes	chr4	112186252	112186254	C4orf32
cg13958725	1					Yes	chr20	1337319	1337321	FKBP1A-SDCBP2
cg13989852	1			Yes			chr15	67967985	67967987
cg14015636	1			Yes			chr2	26012688	26012690
cg14096249	1					Yes	chr11	95737077	95737079
cg14102530	1			Yes			chr20	54064384	54064386	BCAS1
cg14115597	2				Yes	Yes	chr5	81626717	81626719	SSBP2
cg14115807	3	Yes	Yes			Yes	chr9	74960692	74960694	C9orf41-AS1
cg14144175	1					Yes	chr11	44105115	44105117	EXT2
cg14187466	1			Yes			chr15	75627446	75627448	SNUPN
cg14209784	1			Yes			chr10	86970103	86970105	AGAP11
cg14220416	1					Yes	chr8	116037313	116037315	LINC00536
cg14245034	1					Yes	chr8	123708094	123708096	ANXA13
cg14307506	3	Yes	Yes			Yes	chr19	4284363	4284365	SHD
cg14308782	1			Yes			chr8	58911255	58911257	TOX
cg14309283	1			Yes			chr6	33315112	33315114	ZBTB22
cg14315118	1					Yes	chr10	31137767	31137769
cg14321810	1			Yes			chr4	36290595	36290597	DTHD1
cg14358337	1			Yes			chr3	27293741	27293743	NEK10
cg14382428	1					Yes	chr12	40230315	40230317	LRRK2
cg14410590	1					Yes	chr8	103080953	103080955
cg14431020	1					Yes	chr7	37216629	37216631	ELMO1
cg14431490	1					Yes	chr16	89827843	89827845	SPIRE2
cg14468284	2				Yes	Yes	chr6	170096728	170096730
cg14488317	1			Yes			chr11	3160215	3160217	OSBPL5
cg14510632	1					Yes	chr6	137790380	137790382
cg14663625	1					Yes	chr16	3065645	3065647	IL32
cg14665939	1			Yes			chr18	33185206	33185208	CCDC178
cg14675361	1					Yes	chr13	75760446	75760448	LMO7
cg14679276	1			Yes			chr1	91572563	91572565
cg14721087	1					Yes	chr15	61174510	61174512	RORA
cg14734668	3	Yes	Yes			Yes	chr10	20575763	20575765
cg14807892	2				Yes	Yes	chr2	178242488	178242490	OSBPL6
cg14818391	3	Yes	Yes			Yes	chr3	40387014	40387016	ENTPD3
cg14829814	4	Yes	Yes		Yes	Yes	chr12	107901116	107901118
cg14879894	1	Yes					chr4	150326081	150326083	LRBA
cg14892768	1					Yes	chr19	41219426	41219428	AXL
cg14912143	1					Yes	chr12	3704916	3704918	CRACR2A
cg14970481	2				Yes	Yes	chr2	201407178	201407180	TRAK2
cg14973055	1					Yes	chr17	74309898	74309900	DNAI2
cg15010352	3	Yes			Yes	Yes	chr19	12838038	12838040	MAST1
cg15051989	1					Yes	chr1	3598371	3598373	MEGF6
cg15089957	1					Yes	chr12	100445406	100445408
cg15148145	3	Yes	Yes			Yes	chr2	163683232	163683234	FIGN
cg15227231	1			Yes			chr6	170152200	170152202
cg15264878	1					Yes	chr13	76426104	76426106
cg15287541	1			Yes			chr6	30016329	30016331	NCRNA00171
cg15327692	1					Yes	chr15	38566930	38566932	RASGRP1
cg15391296	1					Yes	chr8	39912855	39912857	IDO1
cg15417641	2	Yes	Yes				chr3	53666113	53666115	CACNA1D
cg15448314	1					Yes	chr16	87295866	87295868	C16orf95
cg15490177	1					Yes	chr4	150619229	150619231	LRBA
cg15497761	1			Yes			chr1	155174920	155174922	TRIM46
cg15581911	1					Yes	chr1	61606589	61606591
cg15645467	1			Yes			chr1	243253271	243253273	CEP170
cg15649236	1			Yes			chr17	48580141	48580143	MIR10A
cg15690700	1			Yes			chr2	105800568	105800570	NCK2
cg15720713	1			Yes			chr16	69299065	69299067	SNTB2
cg15724534	1			Yes			chr2	210153638	210153640	C2orf67
cg15810470	1					Yes	chr8	24384510	24384512	ADAMDEC1
cg15827169	1					Yes	chr5	124746036	124746038	ZNF608
cg15876676	1					Yes	chr13	95003261	95003263
cg15882034	1					Yes	chr19	39937767	39937769
cg15933979	1			Yes			chr1	33082881	33082883	AZIN2
cg15972391	1			Yes			chr8	28375568	28375570	ZNF395
cg16014085	1			Yes			chr16	30394800	30394802	ZNF48
cg16015295	1				Yes		chr17	80819678	80819680	RPTOR
cg16149401	2				Yes	Yes	chr8	100336518	100336520	RNF19A
cg16151795	1				Yes		chr11	1897219	1897221
cg16152753	1					Yes	chr10	23443158	23443160
cg16190478	4	Yes	Yes		Yes	Yes	chr21	44369238	44369240	TRPM2
cg16206744	1					Yes	chr6	28864496	28864498	XXbac-BPG308K3.6
cg16280762	1					Yes	chr2	118097858	118097860	INSIG2
cg16321846	1					Yes	chr7	4010481	4010483	SDK1
cg16335868	1			Yes			chr5	170353475	170353477	KCNIP1
cg16405432	1			Yes			chr14	95507372	95507374
cg16430535	1					Yes	chr20	62710811	62710813	NTSR1
cg16448636	1					Yes	chr7	21169889	21169891
cg16532938	1					Yes	chr2	163728124	163728126	FIGN
cg16545019	2				Yes	Yes	chr9	14277484	14277486	NFIB
cg16555466	1			Yes			chr14	91575988	91575990	C14orf184
cg16568681	1			Yes			chr11	33736958	33736960	CD59
cg16596295	1			Yes			chr2	119120348	119120350
cg16744741	1					Yes	chr4	81204870	81204872	PRKG2
cg16814786	1			Yes			chr10	46020057	46020059	NCOA4
cg16841325	1					Yes	chr7	129963553	129963555	Y_RNA
cg16843694	1	Yes					chr12	103794940	103794942	NT5DC3
cg16849075	1			Yes			chr7	77404083	77404085	GSAP
cg16874669	1					Yes	chr2	188372366	188372368	GULP1
cg16875632	1			Yes			chr6	20174236	20174238	MBOAT1
cg17022362	3	Yes	Yes			Yes	chr20	63453479	63453481	KCNQ2
cg17034901	1			Yes			chr3	143811104	143811106	SLC9A9
cg17169196	1			Yes			chr6	31572248	31572250	LTA
cg17200465	1					Yes	chr3	40387016	40387018	ENTPD3
cg17202488	3		Yes		Yes	Yes	chr20	1337089	1337091	FKBP1A-SDCBP2
cg17305215	2				Yes	Yes	chr12	60172798	60172800
cg17318748	1					Yes	chr2	120210556	120210558	AC012363.4
cg17330403	3	Yes			Yes	Yes	chr14	73452533	73452535	NUMB
cg17378265	1					Yes	chr10	120980897	120980899	MIR5694
cg17427732	1					Yes	chr10	77944611	77944613
cg17511274	1			Yes			chr18	23498394	23498396
cg17598923	2	Yes	Yes				chr5	101783379	101783381
cg17610333	2	Yes			Yes		chr6	167706632	167706634
cg17631924	2				Yes	Yes	chr17	28034180	28034182
cg17688837	1			Yes			chr4	25089042	25089044
cg17711402	1					Yes	chr22	17304072	17304074
cg17787387	1			Yes			chr1	35202049	35202051
cg17927824	3	Yes			Yes	Yes	chr5	117594296	117594298
cg17958950	1					Yes	chr6	14997153	14997155	RP11-146I2.1
cg18069568	1			Yes			chr18	46103955	46103957	ATP5A1
cg18084442	4	Yes	Yes		Yes	Yes	chr5	990659	990661	LOC100506688
cg18213786	1					Yes	chr2	33134453	33134455	LTBP1
cg18320790	1			Yes			chr15	89095341	89095343	ABHD2
cg18347497	1			Yes			chr8	59530169	59530171
cg18365765	1					Yes	chr3	72951375	72951377	GXYLT2
cg18391937	1					Yes	chr14	55072818	55072820
cg18396668	1					Yes	chr5	140588810	140588812	APBB3
cg18466965	1					Yes	chr12	117190783	117190785	FBXO21
cg18553228	1					Yes	chr19	50531380	50531382	LRRC4B
cg18580322	3	Yes	Yes			Yes	chr14	30558608	30558610	G2E3
cg18594671	1					Yes	chr7	116355422	116355424	AC002066.1
cg18674312	1			Yes			chr15	92694350	92694352	FAM174B
cg18727742	4	Yes	Yes		Yes	Yes	chr11	288300	288302	ATHL1
cg18749800	1			Yes			chr1	214327713	214327715	SMYD2
cg18766210	2				Yes	Yes	chr3	55491548	55491550
cg18790856	1					Yes	chr2	37524305	37524307
cg18825101	2				Yes	Yes	chr5	2656125	2656127
cg18854765	1			Yes			chr1	74199677	74199679	LRRIQ3
cg18864535	1					Yes	chr14	104903420	104903422	CTD-3051D23.3
cg18905278	1					Yes	chr6	145743479	145743481	LOC100507557
cg19048010	1					Yes	chr17	29757977	29757979	SSH2
cg19053081	1			Yes			chr2	242060329	242060331	LINC01237
cg19145477	1			Yes			chr17	75352380	75352382	GRB2
cg19147608	2		Yes			Yes	chr2	234116192	234116194
cg19149957	1			Yes			chr4	48243463	48243465	TEC
cg19169932	1					Yes	chr15	62569755	62569757	TLN2
cg19173375	1					Yes	chr6	27912338	27912340	OR2B2
cg19179910	4	Yes	Yes		Yes	Yes	chr6	30987580	30987582	MUC21
cg19235198	3	Yes			Yes	Yes	chr8	100336259	100336261	RNF19A
cg19251978	1					Yes	chr5	148121287	148121289	SPINK5
cg19312667	1			Yes			chr4	25088868	25088870
cg19380499	1			Yes			chr3	129003671	129003673	CCDC48
cg19398496	1					Yes	chr6	26323208	26323210
cg19404596	2				Yes	Yes	chr12	129771524	129771526	TMEM132D
cg19446165	2	Yes				Yes	chr17	335964	335966	RPH3AL
cg19470812	1					Yes	chr14	99146925	99146927
cg19509401	2				Yes	Yes	chr16	19375973	19375975	CTA-363E6.2
cg19614521	1					Yes	chr9	37911965	37911967	RP11-613M10.9
cg19659678	4	Yes	Yes		Yes	Yes	chr16	86241982	86241984	LINC01081
cg19675668	2				Yes	Yes	chr10	118596559	118596561	PRLHR
cg19676182	1					Yes	chr4	24980072	24980074	CCDC149
cg19679682	1					Yes	chr3	66397858	66397860	LRIG1
cg19682276	1					Yes	chr13	32079850	32079852	FRY
cg19719475	1			Yes			chr3	23807622	23807624	UBE2E1
cg19773385	1			Yes			chr1	10328587	10328589	KIF1B
cg19787097	1					Yes	chr3	29335671	29335673	RBMS3
cg19885130	1			Yes			chr11	68379363	68379365	LRP5
cg19998408	1					Yes	chr8	58595008	58595010	NSMAF
cg20019675	1			Yes			chr8	47659495	47659497	SPIDR
cg20035679	1					Yes	chr12	3454265	3454267
cg20065449	1					Yes	chr1	248143819	248143821	OR2M5
cg20090970	1			Yes			chr3	119325675	119325677	CDGAP
cg20098659	2	Yes				Yes	chr12	10030764	10030766	CLEC9A
cg20132612	2				Yes	Yes	chr9	6629027	6629029	GLDC
cg20237752	1			Yes			chr5	124744533	124744535	ZNF608
cg20252837	1	Yes					chr20	63942760	63942762	UCKL1
cg20304618	2				Yes	Yes	chr4	164876724	164876726	APELA
cg20331218	1					Yes	chr9	117345471	117345473	ASTN2
cg20332679	4	Yes	Yes		Yes	Yes	chr8	10825677	10825679	MIR1322
cg20435325	1					Yes	chr12	59737063	59737065	SLC16A7
cg20437276	2				Yes	Yes	chr6	33161307	33161309
cg20444256	1					Yes	chr19	45323082	45323084	CKM
cg20451680	1					Yes	chr5	54985507	54985509	ESM1
cg20470583	1					Yes	chr12	32485895	32485897	FGD4
cg20737242	3	Yes	Yes			Yes	chr4	125390285	125390287	FAT4
cg20741644	1			Yes			chr2	210195246	210195248	ACADL
cg20759273	1			Yes			chr11	117426571	117426573
cg20794824	1					Yes	chr3	170420416	170420418	CLDN11
cg20801278	1					Yes	chr2	169397815	169397817
cg20822254	1			Yes			chr16	89981611	89981613	AFG3L1P
cg20824844	1					Yes	chr5	14326287	14326289	TRIO
cg20969225	1			Yes			chr9	89456124	89456126	SEMA4D
cg21004565	1					Yes	chr12	93676698	93676700	CRADD
cg21074766	3	Yes	Yes			Yes	chr15	98525847	98525849
cg21116457	1					Yes	chr18	45724041	45724043	SLC14A1
cg21150327	1				Yes		chr12	96495991	96495993	CFAP54
cg21205855	1					Yes	chr8	60651306	60651308
cg21215899	2				Yes	Yes	chr5	122078729	122078731	LOX
cg21239001	1			Yes			chr5	119302922	119302924	TNFAIP8
cg21266908	3	Yes	Yes			Yes	chr6	46492733	46492735	RCAN2
cg21330944	1					Yes	chr12	26996980	26996982	TM7SF3
cg21378582	1					Yes	chr11	72759335	72759337	STARD10
cg21410051	1					Yes	chr5	52703048	52703050	CTD-2288O8.1
cg21470541	1			Yes			chr2	120219319	120219321
cg21510194	1					Yes	chr2	235263725	235263727
cg21651647	1					Yes	chr2	54274840	54274842	ACYP2
cg21668652	1					Yes	chr17	57672176	57672178	MSI2
cg21754524	1			Yes			chr6	148854199	148854201	UST
cg21821982	1			Yes			chr3	31505762	31505764
cg21836919	1					Yes	chr1	207178117	207178119	RP11-164O23.7
cg21873016	1			Yes			chr3	121836723	121836725	EAF2
cg21877182	1			Yes			chr15	38611050	38611052
cg21878650	1					Yes	chr5	65262795	65262797	ADAMTS6
cg21896567	1					Yes	chr16	56520396	56520398	BBS2
cg21922478	1					Yes	chr5	52945259	52945261	ITGA1
cg21937128	1			Yes			chr1	150999412	150999414	FAM63A
cg22001483	4	Yes	Yes		Yes	Yes	chr6	167708812	167708814
cg22005990	1			Yes			chr17	48582576	48582578	HOXB3
cg22031664	2				Yes	Yes	chr20	61719883	61719885	CDH4
cg22033758	2			Yes		Yes	chr5	76319668	76319670	SV2C
cg22152446	1			Yes			chr4	48752935	48752937	FRYL
cg22167893	1					Yes	chr7	66206563	66206565	TPST1
cg22234738	1					Yes	chr2	47193314	47193316	LOC101927043
cg22255381	1			Yes			chr3	194167058	194167060
cg22277154	4	Yes	Yes		Yes	Yes	chr13	30446330	30446332
cg22280375	1					Yes	chr3	69433265	69433267	FRMD4B
cg22359701	2				Yes	Yes	chr13	80824222	80824224
cg22447989	1					Yes	chr12	112937755	112937757	OAS3
cg22507069	2	Yes	Yes				chr4	165440732	165440734	CPE
cg22547861	2				Yes	Yes	chr6	52305099	52305101
cg22575379	1					Yes	chr3	131361390	131361392	NUDT16P
cg22706883	1			Yes			chr15	67522541	67522543	C15orf61
cg22749565	1					Yes	chr17	35900952	35900954
cg22775310	1			Yes			chr3	138114805	138114807	DZIP1L
cg22831526	1					Yes	chr3	194985438	194985440
cg22841716	1			Yes			chr5	132369099	132369101	SLC22A5
cg22932685	1			Yes			chr8	11806624	11806626	FDFT1
cg22933714	1			Yes			chr14	59482681	59482683	L3HYPDH
cg22947000	3	Yes	Yes			Yes	chr16	81238675	81238677	BCMO1
cg22954437	1					Yes	chr14	101874059	101874061	PPP2R5C
cg22989419	1					Yes	chr20	9359748	9359750	PLCB4
cg23000710	1	Yes					chr11	48210389	48210391
cg23214895	1			Yes			chr3	150738281	150738283
cg23363602	1				Yes		chr6	29966193	29966195
cg23374992	1			Yes			chr2	136114496	136114498	CXCR4
cg23415995	1					Yes	chr4	127783495	127783497	HSPA4L
cg23451443	4	Yes	Yes		Yes	Yes	chr8	100336815	100336817	RNF19A
cg23574418	1					Yes	chr7	76419440	76419442	ZP3
cg23629935	1			Yes			chr14	89701114	89701116	RP11-33N16.3
cg23634134	1	Yes					chr14	20614233	20614235
cg23649619	1					Yes	chr2	97844575	97844577	TMEM131
cg23656415	1					Yes	chr3	156594584	156594586
cg23713621	1			Yes			chr3	45684420	45684422	LIMD1-AS1
cg23846712	1			Yes			chr19	3607609	3607611	TBXA2R
cg23847017	1			Yes			chr1	28438342	28438344	PHACTR4
cg23859303	2	Yes	Yes				chr7	158450939	158450941	PTPRN2
cg23907520	1					Yes	chr1	248143868	248143870	OR2M5
cg23914842	2	Yes	Yes				chr1	9267110	9267112	H6PD
cg23926598	1					Yes	chr2	47179718	47179720
cg23949114	1			Yes			chr9	114619577	114619579	C9orf91
cg24003560	1					Yes	chr1	220690004	220690006	C1orf115
cg24034258	2				Yes	Yes	chr1	114751310	114751312	CSDE1
cg24040694	1					Yes	chr22	24486702	24486704	ADORA2A-AS1
cg24058402	1					Yes	chr22	39092808	39092810	RP4-742C19.12
cg24134897	1				Yes		chr11	859669	859671	TSPAN4
cg24158324	1					Yes	chr3	55491938	55491940
cg24165747	1					Yes	chr19	41936045	41936047
cg24186951	1			Yes			chr2	59277849	59277851	LOC101927285
cg24191225	1	Yes					chr12	9733227	9733229	CLECL1
cg24360230	1				Yes		chr12	40692081	40692083	CNTN1
cg24388310	1					Yes	chr5	170360776	170360778	KCNIP1
cg24407596	4	Yes	Yes		Yes	Yes	chr7	99121059	99121061	SMURF1
cg24419094	2				Yes	Yes	chr2	10126858	10126860	RRM2
cg24426797	2				Yes	Yes	chr10	45532794	45532796	MARCH8
cg24450239	3	Yes			Yes	Yes	chr8	100336272	100336274	KB-1991G8.1
cg24470379	1					Yes	chr12	12992780	12992782	HEBP1
cg24506197	2				Yes	Yes	chr7	158408699	158408701	PTPRN2
cg24527044	1					Yes	chr7	6591599	6591601	C7orf26
cg24553651	1					Yes	chr10	100433638	100433640
cg24617176	1					Yes	chr8	81695524	81695526	SLC10A5
cg24646748	1					Yes	chr5	82985674	82985676
cg24664957	1					Yes	chr12	122896455	122896457	VPS37B
cg24675775	1			Yes			chr11	74321633	74321635	LOC101928580
cg24677395	2				Yes	Yes	chr2	24048915	24048917	C2orf44
cg24677604	2				Yes	Yes	chr9	80379215	80379217
cg24700586	1					Yes	chr8	31299084	31299086	RP11-566H8.3
cg24731731	1					Yes	chr11	61777875	61777877	C11orf9
cg24808901	4	Yes	Yes		Yes	Yes	chr1	95233397	95233399	RWDD3
cg24834886	1			Yes			chr13	49447468	49447470	SETDB2
cg24849956	4	Yes	Yes		Yes	Yes	chr12	102822722	102822724	LINC00485
cg24891846	3	Yes	Yes			Yes	chr19	13208708	13208710	CACNA1A
cg24894657	2				Yes	Yes	chr2	241774997	241774999
cg24986840	1					Yes	chr11	112823105	112823107
cg25001190	1			Yes			chr1	61203162	61203164	NFIA
cg25038082	2				Yes	Yes	chr17	39739820	39739822	GRB7
cg25106671	1			Yes			chr7	4725730	4725732	FOXK1
cg25125298	1			Yes			chr5	72557387	72557389
cg25146434	1					Yes	chr3	16536034	16536036	RP11-194G10.1
cg25183896	2				Yes	Yes	chr19	1511129	1511131	ADAMTSL5
cg25223634	1			Yes			chr10	102776937	102776939	C10orf26
cg25257799	1			Yes			chr8	47659994	47659996	KIAA0146
cg25264268	4	Yes	Yes		Yes	Yes	chr19	427262	427264	SHC2
cg25283121	1	Yes					chr12	132327953	132327955	GALNT9
cg25308803	2	Yes	Yes				chr2	109130278	109130280	LOC100287216
cg25325699	1					Yes	chr4	139891043	139891045	MAML3
cg25371251	1			Yes			chr11	68716024	68716026	MTL5
cg25400597	1	Yes					chr5	53246493	53246495
cg25439632	2				Yes	Yes	chr8	48979649	48979651
cg25567227	1			Yes			chr1	53368778	53368780	RP11-117D22.2
cg25589001	1			Yes			chr10	96845294	96845296	LCOR
cg25594449	4	Yes	Yes		Yes	Yes	chr18	3029574	3029576
cg25638993	1				Yes		chr20	63454275	63454277	KCNQ2
cg25695450	1					Yes	chr7	41219438	41219440
cg25731655	2	Yes				Yes	chr10	14560451	14560453	FAM107B
cg25754958	1					Yes	chr1	202161563	202161565	PTPN7
cg25804044	1					Yes	chr6	31903192	31903194	ZBTB12
cg25868767	1					Yes	chr15	58229590	58229592	ALDH1A2
cg25941751	1			Yes			chr2	46386404	46386406	EPAS1
cg25956901	1					Yes	chr19	17718868	17718870	MAP1S
cg25997474	1					Yes	chr4	99352811	99352813	ADH1C
cg26081717	1					Yes	chr9	101487464	101487466	TMEM246
cg26088680	2	Yes	Yes				chr14	94893428	94893430
cg26106178	1			Yes			chr17	40203412	40203414
cg26166717	1					Yes	chr6	161439170	161439172	PARK2
cg26209441	1			Yes			chr1	12441627	12441629	VPS13D
cg26236143	1					Yes	chr3	29335668	29335670	RBMS3
cg26242531	1					Yes	chr14	103724340	103724342	ZFYVE21
cg26250585	1					Yes	chr11	60183271	60183273	MS4A6A
cg26262055	1			Yes			chr4	25088995	25088997
cg26288715	1			Yes			chr6	135185695	135185697	MYB
cg26392737	1					Yes	chr8	22059341	22059343	EPB49
cg26393275	1					Yes	chr2	156578963	156578965	GPD2
cg26407841	1					Yes	chr7	81846403	81846405
cg26468118	1			Yes			chr13	110523322	110523324	RAB20
cg26475911	1			Yes			chr17	75060091	75060093	KCTD2
cg26478401	1					Yes	chr10	88990162	88990164	FAS
cg26514961	2				Yes	Yes	chr12	94173007	94173009	PLXNC1
cg26537280	2				Yes	Yes	chr1	95233480	95233482	RWDD3
cg26545245	1					Yes	chr12	56988498	56988500
cg26551026	2			Yes		Yes	chr18	23137728	23137730	CABLES1
cg26571870	1					Yes	chr16	85689543	85689545	GINS2
cg26607031	1					Yes	chr1	9542642	9542644	SLC25A33
cg26677315	1					Yes	chr15	96494820	96494822
cg26683398	1			Yes			chr5	179793587	179793589	LTC4S
cg26690511	1					Yes	chr3	155704313	155704315	PLCH1
cg26745861	1					Yes	chr2	240737684	240737686	KIF1A
cg26858890	1					Yes	chr19	4785592	4785594
cg26878709	1					Yes	chr11	120326428	120326430	TMEM136
cg26916621	1			Yes			chr17	48579983	48579985	MIR10A
cg26981703	1					Yes	chr12	38275325	38275327	Y_RNA
cg27031974	2				Yes	Yes	chr10	14959143	14959145	MEIG1
cg27134944	1			Yes			chr13	75536970	75536972	COMMD6
cg27135057	1					Yes	chr3	71515887	71515889	FOXP1
cg27159902	2	Yes				Yes	chr8	94217330	94217332	CDH17
cg27170376	1			Yes			chr17	2242122	2242124	SMG6
cg27178187	1					Yes	chr6	157964226	157964228
cg27190410	2				Yes	Yes	chr8	100336410	100336412	RNF19A
cg27315958	2	Yes				Yes	chr8	17349309	17349311	MTMR7
cg27328431	1					Yes	chr21	44369294	44369296	TRPM2
cg27367526	3	Yes	Yes			Yes	chr7	90212377	90212379	STEAP2
cg27430293	1					Yes	chr16	89003526	89003528
cg27434890	1					Yes	chr6	135195902	135195904	MYB
cg27512469	1	Yes					chr6	29110946	29110948	OR2J3
cg27634195	1	Yes					chr16	1390419	1390421
cg27635586	1					Yes	chr2	126467599	126467601
