# Supplementary material for: Sex-specific and multiomic integration enhance accuracy of peripheral blood biomarkers of major depressive disorder
Source: Research Square preprint supplement (doi:10.21203/rs.3.rs-3978037/v1), 2024-02-23
Supplement: Supplementary file 8 [file ff315c4433bd53af887a8e37.xlsx]

## Sheet: GSEA
Supplementary Table 4: Comparison of the results of differential methylation analyses with published MDD EWAS studies using CpGSEA (GSEA applied to CpGs with 100 000 permutations)
Reference	N samples	#CpGs used for CpGSEA	CpGSEA in females			CpGSEA in males
			pval	padj	NES	pval	padj	NES
Barbu et al. 2021	15983	10 (from 10)	0.390061	0.489033	1.06741	0.653642	0.851214	0.922469
Story Jovanova et al. 2018	7948	38 (from 41)	0.658563	0.658563	0.952094	0.714183	0.851214	0.931194
Li et al. 2022	361	19 (from 19)	0.0701561	0.17539	1.23439	0.851214	0.851214	0.827034
Tao et al. 2023	9	2814 (from 3034)	0.000539995	0.00269997	1.05309	0.00573994	0.0286997	1.04041
Xiu et al. 2022	80	38 (from 74)	0.391226	0.489033	1.03675	0.720133	0.851214	0.928947
References:
Barbu MC, Shen X, Walker RM, Howard DM, Evans KL, Whalley HC, Porteous DJ, Morris SW, Deary IJ, Zeng Y, Marioni RE, Clarke TK, McIntosh AM. Epigenetic prediction of major depressive disorder. Mol Psychiatry. 2021 Sep;26(9):5112-5123. doi: 10.1038/s41380-020-0808-3. Epub 2020 Jun 10. PMID: 32523041; PMCID: PMC8589651.
Story Jovanova O, Nedeljkovic I, Spieler D, Walker RM, Liu C, Luciano M, Bressler J, Brody J, Drake AJ, Evans KL, Gondalia R, Kunze S, Kuhnel B, Lahti J, Lemaitre RN, Marioni RE, Swenson B, Himali JJ, Wu H, Li Y, McRae AF, Russ TC, Stewart J, Wang Z, Zhang G, Ladwig KH, Uitterlinden AG, Guo X, Peters A, Räikkönen K, Starr JM, Waldenberger M, Wray NR, Whitsel EA, Sotoodehnia N, Seshadri S, Porteou…
Li QS, Morrison RL, Turecki G, Drevets WC. Meta-analysis of epigenome-wide association studies of major depressive disorder. Sci Rep. 2022 Nov 1;12(1):18361. doi: 10.1038/s41598-022-22744-6. PMID: 36319817; PMCID: PMC9626569.
Tao Y, Zhang H, Jin M, Xu H, Zou S, Deng F, Huang L, Zhang H, Wang X, Tang X, Dong Z, Wang Y, Yin L. Co-expression network of mRNA and DNA methylation in first-episode and drug-naive adolescents with major depressive disorder. Front Psychiatry. 2023 Feb 23;14:1065417. doi: 10.3389/fpsyt.2023.1065417. PMID: 36911124; PMCID: PMC9995926.
Xiu J, Li J, Liu Z, Wei H, Zhu C, Han R, Liu Z, Zhu W, Shen Y, Xu Q. Elevated BICD2 DNA methylation in blood of major depressive disorder patients and reduction of depressive-like behaviors in hippocampal Bicd2-knockdown mice. Proc Natl Acad Sci U S A. 2022 Jul 26;119(30):e2201967119. doi: 10.1073/pnas.2201967119. Epub 2022 Jul 18. PMID: 35858435; PMCID: PMC9335189.
